# Supplementary material for: Staphylococcus aureus Transcriptome Data and Metabolic Modelling Investigate the Interplay of Ser/Thr Kinase PknB, Its Phosphatase Stp, the glmR/yvcK Regulon and the cdaA Operon for Metabolic Adaptation
Source: MDPI journal article supplement (doi:10.3390/microorganisms9102148), 2021-10-14
Supplement: s1 [file s1]

## Supplementary Materials

**Supplementary Materials:** The following files and data are available online at [www.mdpi.com/xxx/s1](http://www.mdpi.com/xxx/s1):

This doc file provides a supplementary material overview and contains:

-**Overall investigation and Figure S1:** Growth curve of *S. aureus* strains NewHG wt compared to its isogenic *pknB*, *stp* and *pknB/stp* mutant strains.

- **Figure S2:** Convergence plots of (A) WT, (B) *pknB*, (C) *stp* and (D) *pknBstp*.

-Additional data on **conservation of *glmR*** including **Figure S3:** Identification of residues involved in UDP-sugar binding in GlmR/YvcK protein (complete sequence alignment profile of GlmR/YvcK in different bacteria including several *S. aureus* strains).

-**Table S14.** Flux activities comparing WT and *PknB* mutant in *S.aureus* strains NewHG and NCTC8325.

-**Table S15:** qRT-PCR confirmation of microarray data

We provide the other supplementary files **Table S1-S13** not in this doc File. Apart from Suppl2 (model file in SBML format) all Supplemental files are in excel format.

Suppl1 contains **Table S1** (Genes whose transcription were significantly higher or lower expressed) and **Table S2** (Expression of Virulence factors).

Suppl2 shows the **metabolic model** in **SBML format**.

Suppl3 has **Table S3** - Enzyme activities of each mutant compared to the WT.

Suppl4 has **Table S4**, NewHG gene expression raw data.

Suppl5 contains **Table S5** (Gene expression of WT versus Double Mutant), **Table S6** (Gene expression of WT versus *pknB* knockout) and **Table S7** (Gene expression of WT versus *stp* knockout).

Suppl6 contains three tables on genome annotation regarding the specific genes for each strain: **Table S8** (Genomic comparison between *S. aureus* NCTC 8325 and Newman), **Table S9** (Genomic comparison between *S. aureus* NCTC 8325 and COL) and **Table S10** (Genomic comparison between *S. aureus* NCTC 8325 and COL).

Suppl7 Stochastic matrix and reactions involved in the condensed model of *S. aureus* NewHG – model file in cvs format-

Suppl8-**Table S11.** Stochastic matrix and reactions involved in the condensed model of *S. aureus* NewHG – model file in excel format.

Suppl9-**Table S12.** Extreme pathway modes of *S. aureus* NewHG – solution space.

Suppl10- **Table S13.** Gene identifiers of two microarray designs mapping and comparing NewHG-Agilent with NCTC 8325- Scienion, gene symbols are also added.

The overall aim of our investigations is to understand the effect of the Ser/Thr kinase *pknB*, its phosphatase *stp* and to understand antagonistic or synergistic by studying the wildtype and double knockout. The workflow focuses first on calculation of metabolic fluxes from transcriptome dataset on *S. aureus* strain NewHG and comparing it to *pknB*, *stp* and double knockout. Secondly, we validated the results by individual qRT-PCR of selected virulence and metabolic genes further we performed the global comparison with *S. aureus* strain NCTC 8325 (Figure 1). The phenotypic data was also taken into consideration to explore effects on cell wall metabolism and its correlation with the phosphorylation mechanism.

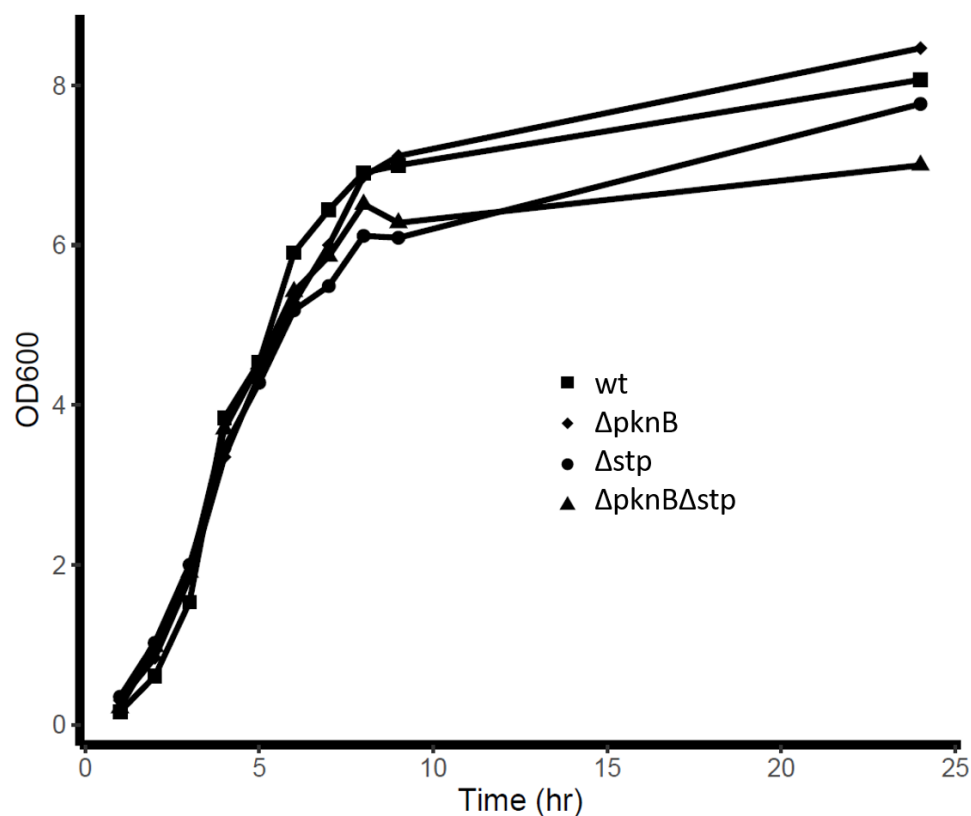

**Figure S1:** Growth curve of *S. aureus* strains NewHG wt compared to its isogenic *pknB*, *stp* and *pknB/stp* mutant strains. Growth in B-medium over a period of 24 h is shown. The generation time of *S. aureus* strain NewHG is 46 min under the applied conditions. In fact, we even measured the growth curves for wildtype and all three mutants and there were no striking differences until all strains reached an OD600 of approximately 5. Later in growth phase the double mutant and the *stp* mutant showed reduced growth rates. The figure compares the growth behavior of the mutants with the wild type strain using a medium mimicing conditions in an abscess (low glucose) using B-medium. The growth happens well for *S. aureus* in this specific medium also up to and beyond OD 5.0. Beyond it, the exponential growth stops and becomes more steady state. There are no strong differences in the growth behavior, however, the double mutant clearly achieves less as maximum growth.

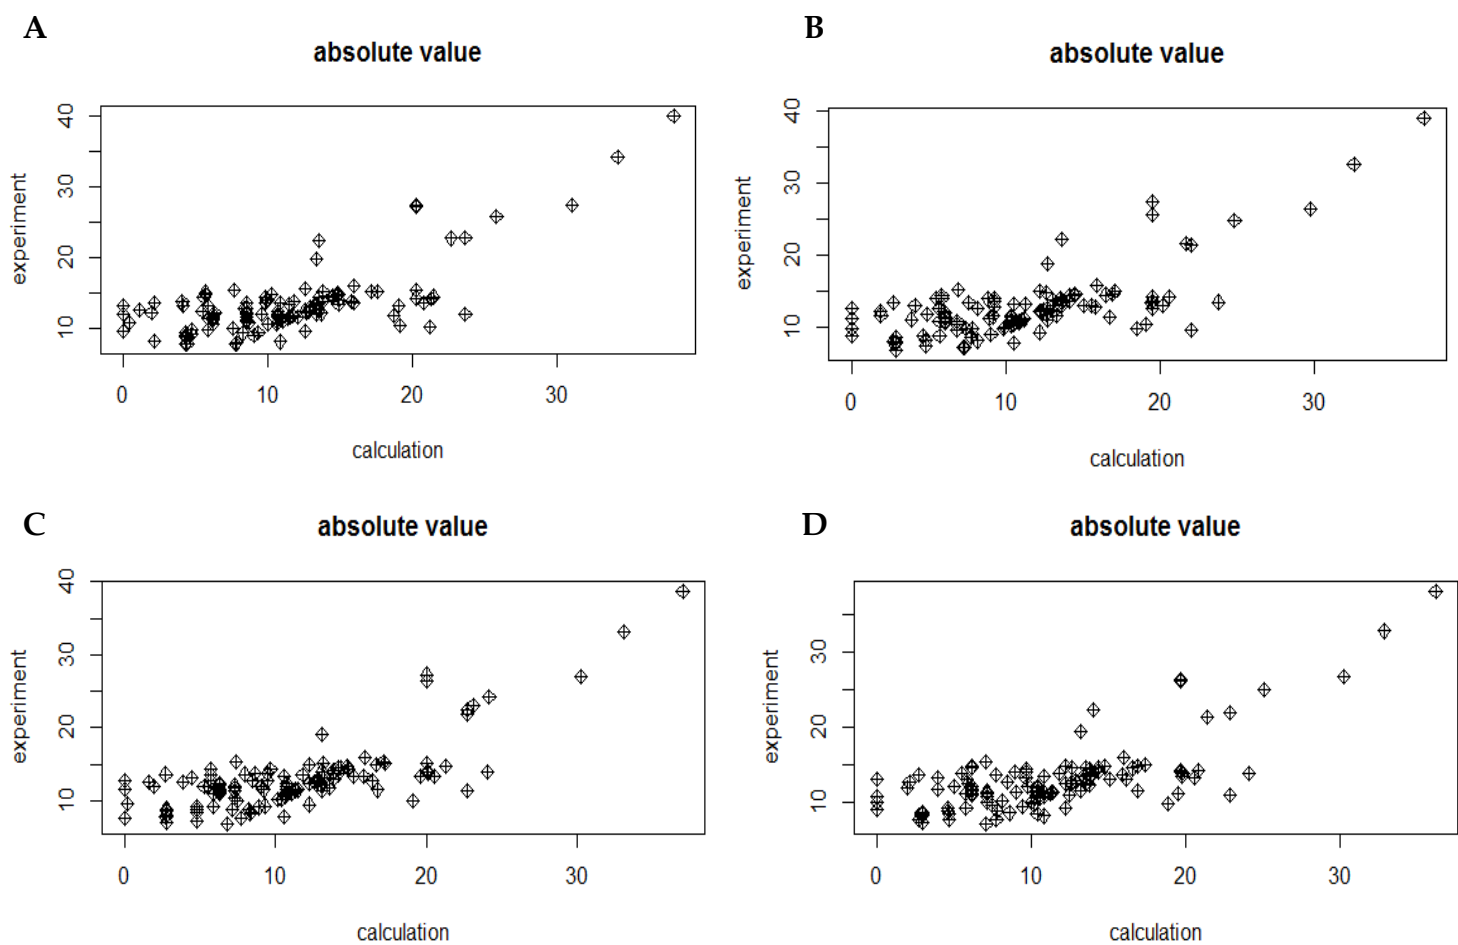

**Figure S2:** Convergence plots of (A) WT, (B) *pknB*, (C) *stp* and (D) *pknBstp*. The plots show that there is a good correlation between the measured transcriptome data (y-axis) and the flux calculation (x-axis) and we can deduct from this that the flux calculation converged well.

## Conservation of *glmR*

As depicted in Figure 6, the *glmR/yvcK* and *pknB* operons are variable between species. Based on our results of pathway analysis and the suggested role of PknB/Stp, we propose that GlmR/YvcK and proteins encoded by the *glmR/yvcK* regulon might play a role in the switch between glycolysis and gluconeogenesis, although the *glmR/yvcK* regulon is variable in different species. As mentioned before, the *glmR/yvcK* regulon seems to have three core genes, which are conserved among the studied organisms. The genes the core comprises are: *yvcJ* (RNase adaptor Rapz), *glmR/yvcK*, and *whiA* (transcription factor). The first one is known to interact with RNase E in *E. coli* to control the translation of some genes. However, RNase E does not have a homologous gene in Firmicutes (*B. subtilis*, *S. aureus*, *L. monocytogenes*) (Guillet, Hallier, & Felden, 2013),(Condon, 2003). Thus, YvcJ may interact with other RNases (Even et al., 2005) in order to regulate late competence genes (Luciano, Foulquier, Fantino, Galinier, & Pompeo, 2009). Another significant fact is that YvcJ GTPase function and subcellular localization in *B. subtilis* depend on the growth medium conditions, mainly they are influenced by the presence or absence of glucose (Pompeo, Luciano, Brochier-Armanet, & Galinier, 2011). Moreover, a *yvcJ* homologous gene in *E. coli* is known to regulate the flux through cell wall synthesis (Kalamorz, Reichenbach, März, Rak, & Görke, 2007). The other gene forming the core regulon with *glmR/yvcK* is *whiA*, which is involved in FtsZ-ring assembly in *B. subtilis* and *S. coelicolor* but not proved yet whether it is a transcription regulator (Surdova et al., 2013),(Ainsa et al., 2000). However, the relationship between these three core genes and how they function together remains to be further investigated.

Apart from the core genes, some microorganisms have other different genes inside the *glmR/yvcK* regulon. In *B. subtilis*, there are two uncharacterized enzymes (acetyltransferase and nudix hydrolase) and Crh, a protein required for carbon catabolite repression (Galinier et al., 1997). In *L. monocytogenes* EGD-e, there are several known genes involved in sugar metabolism including galactose, mannose, and fructose for the synthesis of glycoproteins and glycolipids. There are also two short genes located upstream of the core gene, but their functions remain unclear. Lastly, in *M. tuberculosis* the operon includes an extra gene coding for an endoribonuclease that fixes DNA lesions.

The identification of residues involved in UDP-sugar binding in GlmR/YvcK is shown on next page in **Figure S3**, providing the full alignment.



**Table S14. Flux activities comparing WT and PknB mutant in *S.aureus* strains NewHG and NCTC8325**

| EPM | WT (NewHG)     | PknB (NewHG)  | WT (NCTC8325) | PknB (NCTC8325) | Ratio_NewHG   | Ratio_NCTC8325 |
|-----|----------------|---------------|---------------|-----------------|---------------|----------------|
| 1   | 13.5274496796  | 13.0915648782 | 9.267258786   | 10.1246456098   | 0.9677777547  | 1.0925178463   |
| 2   | 7.7369796456   | 7.2257999745  | 9.3491371896  | 8.4923990841    | 0.9339303327  | 0.9083617998   |
| 3   | 13.348656016   | 12.7122436004 | 7.6610522535  | 6.9835599347    | 0.9523238583  | 0.9115666756   |
| 4   | 14.8567603522  | 14.507840714  | 5.0070897811  | 4.9370154652    | 0.9765144197  | 0.9860049811   |
| 5   | 25.8232973945  | 24.8555084527 | 8.9078746257  | 8.5089068668    | 0.9625226428  | 0.9552117901   |
| 6   | 7.867961062    | 7.3107693647  | 8.7186813827  | 7.8709192603    | 0.9291821994  | 0.9027648695   |
| 7   | 15.99112194    | 15.8781628798 | 15.3464909923 | 14.768208518    | 0.9929361391  | 0.9623182606   |
| 8   | 14.4769752505  | 14.1136841407 | 11.6264287919 | 10.5105343398   | 0.9749055929  | 0.9040208759   |
| 9   | 13.5198207211  | 13.0760480803 | 13.4777095944 | 12.6441545207   | 0.9671761446  | 0.9381530617   |
| 10  | 23.1328865982  | 13.6304843704 | 4.4900038975  | 7.325498436     | 0.5892254005  | 1.6315127121   |
| 11  | -13.5823568323 | 5.46374498    | 5.0070897811  | 4.9370154652    | -0.4022678131 | 0.9860049811   |
| 12  | 7.2478358552   | 7.0806790134  | 5.0070897811  | 4.9370154652    | 0.9769369995  | 0.9860049811   |
| 13  | 34.1926246932  | 32.593633919  | 8.4628229969  | 8.2631610999    | 0.953235799   | 0.9764071756   |
| 14  | 7.2478358552   | 7.0806790134  | 5.0070897811  | 4.9370154652    | 0.9769369995  | 0.9860049811   |
| 15  | 7.2478358552   | 7.0806790134  | 5.0070897811  | 4.9370154652    | 0.9769369995  | 0.9860049811   |
| 16  | 7.2478358552   | 7.0806790134  | 5.0070897811  | 4.9370154652    | 0.9769369995  | 0.9860049811   |
| 17  | 11.0054698983  | 10.508341417  | 5.9122452766  | 9.8261955363    | 0.9548289636  | 1.662007423    |
| 18  | 13.8240504159  | 13.679051662  | 11.0804838672 | 11.8410830279   | 0.9895111238  | 1.068643136    |
| 19  | 22.7048590557  | 21.6889681778 | 5.0070897811  | 4.9370154652    | 0.9552566754  | 0.9860049811   |
| 20  | 11.4265098804  | 11.1972324731 | 11.772895736  | 11.1720008305   | 0.9799346074  | 0.9489594643   |
| 21  | 11.5562502644  | 10.9915859489 | 9.7895477388  | 8.4046972379    | 0.9511377564  | 0.8585378469   |
| 22  | 11.7708198611  | 10.8318570952 | 9.2016526615  | 10.1858818041   | 0.9202296206  | 1.1069622142   |
| 23  | 7.2478358552   | 7.0806790134  | 5.0070897811  | 4.9370154652    | 0.9769369995  | 0.9860049811   |
| 24  | 12.9579258246  | 12.2710167669 | 10.9578837656 | 10.347035684    | 0.9469892738  | 0.9442549223   |
| 25  | 9.0206711284   | 8.1746761648  | 5.0070897811  | 4.9370154652    | 0.906215962   | 0.9860049811   |
| 26  | 9.3597519727   | 9.0476219     | 10.650807502  | 9.2592459952    | 0.9666518863  | 0.8693468541   |
| 27  | 10.6403453747  | 9.8548821066  | 7.8857081044  | 9.035942933     | 0.9261806605  | 1.1458632267   |
| 28  | 12.5657562539  | 12.208285124  | 10.3399015841 | 10.3643007905   | 0.9715519605  | 1.0023597136   |
| 29  | 10.8515837552  | 10.5416164139 | 8.5072289799  | 6.7369531983    | 0.9714357509  | 0.7919092356   |
| 30  | 0.0473928065   | 0.0435471597  | 1.3776462159  | 0.087540506     | 0.9188558952  | 0.0635435317   |
| 31  | 24.6955090397  | 24.2969232426 | 19.0930679352 | 18.204918112    | 0.9838599886  | 0.9534831266   |
| 32  | 15.9526644489  | 15.5476847347 | 19.5123126132 | 16.8540239658   | 0.9746136631  | 0.8637635272   |
| 33  | 9.8109583069   | 9.2800341017  | 2.6943869693  | 2.9465936518    | 0.9458845723  | 1.0936044768   |
| 34  | 13.4885148653  | 12.729146022  | 10.2773531338 | 9.7995695976    | 0.943702561   | 0.9535110325   |
| 35  | 10.7119157586  | 10.1268645264 | 10.3049040779 | 11.2408444951   | 0.9453831373  | 1.0908247578   |
| 36  | 13.2478966902  | 12.6690106983 | 9.1834331057  | 7.7076882838    | 0.9563035548  | 0.8393035802   |
| 37  | 0.6200401003   | 0.5918240622  | 0.3947099315  | 0               | 0.9544932044  | 0              |
| 39  | 13.1793476     | 12.4411135462 | 10.7012823672 | 10.7796199928   | 0.9439855389  | 1.0073203961   |
| 41  | 4.9337084168   | 3.7773701474  | 2.6709179068  | 3.302636858     | 0.7656249272  | 1.2365175468   |
| 42  | 1.2326355616   | 2.0450977035  | 3.111887636   | 2.2608725243    | 1.6591259958  | 0.7265276863   |
| 43  | 2.0977259784   | 2.0835096542  | 1.3507407487  | 0               | 0.9932229832  | 0              |
| 44  | 2.3124834959   | 0.4949688036  | 1.5601179494  | 0.8250883201    | 0.2140420913  | 0.5288627827   |
| 45  | 6.4888720118   | 6.8196337886  | 4.7848536183  | 4.0167344014    | 1.0509736941  | 0.839468607    |
| 49  | 11.726350965   | 11.1837782807 | 12.0349117486 | 10.9659888793   | 0.9537304754  | 0.911181495    |
| 50  | 14.5633871053  | 13.5365541612 | 11.4788240035 | 10.7103966149   | 0.9294921616  | 0.9330569588   |

|    |               |               |               |               |               |              |
|----|---------------|---------------|---------------|---------------|---------------|--------------|
| 51 | 0.56021387    | 0.1531324317  | 0.8100564558  | 0.8717908683  | 0.273346377   | 1.0762100124 |
| 52 | 3.4195918127  | 3.767004451   | 0.1870565511  | 1.3834935355  | 1.1015947684  | 7.3961244752 |
| 53 | 0             | 0.0059603629  | 1.8833889241  | 0             | 0             | 0            |
| 54 | 0.7094086252  | 0.4891379403  | 0.0509939568  | 0.0327158188  | 0.6895009772  | 0.6415626648 |
| 55 | 0.1929500141  | 0.2643041451  | 0.3563363075  | 0.8257867361  | 1.3698063008  | 2.3174364179 |
| 56 | 0.2560770205  | 0.2259853743  | 0.3561454958  | 0.3607368947  | 0.8824898612  | 1.0128919188 |
| 57 | 1.5954030665  | 3.6006570016  | 0.9286045084  | 1.5165842149  | 2.2568948733  | 1.6331863578 |
| 58 | 0.3185108803  | 0.3653864364  | 0.0221922091  | 0.0196243209  | 1.1471709729  | 0.884288753  |
| 59 | 0.478152061   | 0.6600135403  | 1.4775003711  | 1.3958673198  | 1.3803423518  | 0.9447492177 |
| 60 | 1.2734368797  | 1.2806982443  | 0.620940629   | 0.9215112709  | 1.0057021787  | 1.4840569739 |
| 61 | 0.0343693562  | 0.4662986499  | 0.3303158938  | 0.3436285326  | 13.5672791342 | 1.04030275   |
| 62 | 0.0824381201  | 0.4757256629  | 0.3223622406  | 0.4331750659  | 5.7707000423  | 1.3437524974 |
| 63 | 0.6048830206  | 1.3870430741  | 0.3069787047  | 0.3722353212  | 2.2930765568  | 1.2125770142 |
| 64 | 0.2584015597  | 1.1276185748  | 0.3016297874  | 0.3225590568  | 4.363822634   | 1.0693872764 |
| 65 | 0.1895292     | 0.2271635384  | 0.663348935   | 0.0666119479  | 1.1985674949  | 0.1004176601 |
| 66 | 1.9288397015  | 1.5404558847  | 0.8300936936  | 0.8225336217  | 0.7986438082  | 0.9908925077 |
| 67 | 0.6324447894  | 0.5677134117  | 0.4434377893  | 0.5632971903  | 0.8976489666  | 1.2702958654 |
| 69 | 1.4735949828  | 0.1446766307  | 0.8100764608  | 0.7065006434  | 0.0981793725  | 0.8721406899 |
| 70 | 1.3996537395  | 0.043500655   | 0.7994544834  | 0.6249505159  | 0.0310795833  | 0.7817211972 |
| 73 | 15.7959443128 | 15.0571915101 | 10.5917649197 | 10.6574571888 | 0.9532314885  | 1.0062022023 |
| 74 | 17.223540549  | 16.5312309314 | 15.6409804701 | 15.5644186316 | 0.9598044539  | 0.9951050487 |
| 75 | 17.2116572391 | 17.0788290015 | 13.5651508875 | 14.5924784187 | 0.9922826584  | 1.0757328495 |
| 76 | 38.044239692  | 37.1312416158 | 6.6014956614  | 8.2046592808  | 0.9760016737  | 1.2428485455 |
| 77 | 8.7167307371  | 7.8679456276  | 3.7776452569  | 7.1645899642  | 0.902625751   | 1.8965756383 |
| 78 | 1.3702749117  | 1.3087798896  | 1.3644299687  | 1.4275331416  | 0.955122128   | 1.0462487444 |
| 79 | 0.4155011953  | 0             | 0.5375644166  | 0.9054357979  | 0             | 1.6843298588 |
| 80 | 0.3632623226  | 0.2167608827  | 0.1486301505  | 0.4630018065  | 0.5967062072  | 3.1151270788 |
| 81 | 11.7919359482 | 11.2775261584 | 10.8761959355 | 10.3637568752 | 0.9563761377  | 0.9528843482 |
| 82 | 0.2126183491  | 0.3689632067  | 0.6504744892  | 0.2204489585  | 1.7353309735  | 0.3389048489 |
| 87 | 4.0833628122  | 3.8630530285  | 1.360591683   | 1.5719824322  | 0.9460469731  | 1.1553667804 |

Flux activity comparison between *S. aureus* NewHG mutant vs WT and NCTC8325 mutant vs WT. As we can observe from the list, the *pknB* mutations on two strains illustrate strain-specific impacts. However, the changes of central metabolism, purine, pyrimidine metabolism, and part of amino acid metabolism remain identical. Results are summarized in the manuscript Table 2.

**Table S15:** qRT-PCR confirmation of microarray data

| Gene product                   | Gene        | Newman<br>ORF | DNA microarray <sup>a</sup> |                  | qRT-PCR <sup>b</sup> |                  |
|--------------------------------|-------------|---------------|-----------------------------|------------------|----------------------|------------------|
|                                |             |               | WT/ $\Delta pknB$           | WT/ $\Delta stp$ | WT/ $\Delta pknB$    | WT/ $\Delta stp$ |
| Staphopain thiol<br>proteinase | <i>sspB</i> | NWMN_         | 0.5                         | 5.2              | 0.6±0.2              |                  |
|                                |             | 0917          |                             |                  | 5.1±0.8              |                  |
| Serine protease<br>SplB        | <i>splB</i> | NWMN_         | 0.2                         | 8.1              | 0.8                  | ±0.3             |
|                                |             | 1705          |                             |                  | 3.9±0.6              |                  |
| Alpha-hemolysin                | <i>hla</i>  | NWMN_         | 0.5                         | 2.4              | 0.6±0.3              |                  |
|                                |             | 1073          |                             |                  | 1.5±0.4              |                  |
| Lipase                         | <i>lip</i>  | NWMN_         | 0.6                         | 1.7              | 0.5±0.2              |                  |
|                                |             | 2569          |                             |                  | 2.3±0.5              |                  |

<sup>a</sup> WT/ $\Delta pknB$  and WT/ $\Delta stp$  mean fold change. The mean ratio ± standard deviation of gene expression level in the mutant strains compared to that of the isogenic wild type strain *S. aureus* NewHG of three independent experiments is shown.

<sup>b</sup> Ratio WT/ $\Delta pknB$  and WT/  $\Delta stp$ . The mean ratio ± standard deviation of the gene expression level in the mutant strains compared to that of the isogenic wild type strain *S. aureus* NewHG of three independent experiments is shown.
