# Supplementary material for: Staphylococcus aureus Transcriptome Data and Metabolic Modelling Investigate the Interplay of Ser/Thr Kinase PknB, Its Phosphatase Stp, the glmR/yvcK Regulon and the cdaA Operon for Metabolic Adaptation
Source: Microorganisms. 2021 Oct 14;9(10):2148. doi: 10.3390/microorganisms9102148 (PMC8537086; doi:10.3390/microorganisms9102148)
Supplement: Supplementary file 1 [file microorganisms-09-02148-s001.zip]

Archive with 10 entries (10 files):
- suppl1_TableS1_expressionOvervieS2_expressed_virulence factors.xlsx
- suppl10_TableS13_twoarry_IDmapping.xlsx
- suppl3_TableS3_Enzyme activities of each mutant compared to the WT .xlsx
- suppl4_TableS4_NewHG_raw_data_GenExpr.xlsx
- suppl5_TranscriptomeComparison TableS5_S6_S7.xlsx
- suppl6_ProteinAnnotation_Table_S8_S9_S10_COL_vs_8325_vs_Newman.xlsx
- suppl7_stoi_pathwayreactionsYana_Format.csv
- suppl8_TableS11_stoi_pathwayreactionsExcel_Format.xlsx
- suppl9_TableS12_EPM.xlsx
- Supplementary_Material_Overview.pdf
