# Supplementary material for: Staphylococcus aureus Transcriptome Data and Metabolic Modelling Investigate the Interplay of Ser/Thr Kinase PknB, Its Phosphatase Stp, the glmR/yvcK Regulon and the cdaA Operon for Metabolic Adaptation
Source: Microorganisms. 2021 Oct 14;9(10):2148. doi: 10.3390/microorganisms9102148 (PMC8537086; doi:10.3390/microorganisms9102148)
Supplement: Supplementary file 1 [file microorganisms-09-02148-s001.zip › suppl1_TableS1_expressionOvervieS2_expressed_virulence factors.xlsx]

## Sheet: rawdata+analysis
Table S1. Genes whose transcription were significantly higher or lower expressed
In Newman	Description	WT-1	WT-2	WT-3	STP-1	STP-2	STP-3	PKNB-1	PKNB-2	PKNB-3	STP-PKNB-1	STP-PKNB-2	STP-PKNB-3	WT	STP	PKNB	dd	STP/WT	PKNB/WT	dd/WT	COG		In Newman	Description	STP/WT	PKNB/WT	dd/WT	SA	pan.gene.symbol	symbol	Description
NWMN_0001	chromosomal replication initiation protein	21703	23701.5	7790.5	12182	17748	8649	11916	7578.1	7723	8626.65	16605	6831	22702.2	14965	9747.05	12615.8	0.659186	0.429343	0.555708	L		NWMN_1130	serine/threonine-protein kinase	1.25832	0.0069518	0.00236064	SA1063	prkC	NWMN_1130	serine/threonine-protein kinase
NWMN_0002	DNA polymerase III subunit beta	10507	17369	5589	6970	12529	6004	8860	9196	5411	11269	11861	4104	13938	9749.5	9028	11565	0.699491	0.647726	0.829746	L		NWMN_2565	intercellular adhesion protein A	0.841316	0.193988	0.00427254	SA2459	icaA	icaA	intercellular adhesion protein A
NWMN_0003	recombination protein F	17646	15862	7269	10516	16751	7719	10036	9691	7284	10983	11928	6885	16754	13633.5	9863.5	11455.5	0.813746	0.588725	0.683747	L		NWMN_1129	protein phosphatase 2C domain-containing protein	0.00747989	0.703284	0.0119115	SA1062	prpC	NWMN_1129	protein phosphatase 2C domain-containing protein
NWMN_0004	DNA gyrase B subunit	16268	15417.5	4509.5	9621	14001.5	7153	10411.5	6341	5682	7296.5	11052.5	5581.5	15842.8	11811.2	8376.25	9174.5	0.74553	0.528712	0.579098	L		NWMN_0681	7-cyano-7-deazaguanine synthase (queuosine biosynthesis)	0.542634	0.50936	0.0452491	SA0667	queC	NWMN_0681	7-cyano-7-deazaguanine synthase (queuosine biosynthesis)
NWMN_0005	DNA gyrase A subunit	3542.67	4470.67	1736	2262.33	4336.33	2162	3040.33	1871.33	1527	2903.33	3547	1661.67	4006.67	3299.33	2455.83	3225.17	0.823461	0.612937	0.80495	L		NWMN_2285	hypothetical protein	0.779766	0.438787	0.0736486	SA2173	-	NWMN_2285	hypothetical protein
NWMN_0006	hypothetical protein	378.1	238.3	124.8	247.7	298.8	209.2	236.8	172.2	147.7	538.5	209.3	162.9	308.2	273.25	204.5	373.9	0.8866	0.66353	1.21317	G		NWMN_1891	hypothetical protein	0.785745	0.396517	0.0937028		-	NWMN_1891	hypothetical protein
NWMN_0007	histidine ammonia-lyase	776.2	698.9	227.4	2330	975.6	336.6	1723	56.02	243.5	27.2	430.9	221.3	737.55	1652.8	889.51	229.05	2.24093	1.20603	0.310555	E		NWMN_0353	ParB family chromosome partioning protein	0.410462	0.0715334	0.114027	SA0348	parB	NWMN_0353	ParB family chromosome partioning protein
NWMN_0008	seryl-tRNA synthetase	1049	1111	906.7	593.8	806.3	1621	1248	560.4	1213	970.5	790.9	911.6	1080	700.05	904.2	880.7	0.648194	0.837222	0.815463	J		NWMN_1473	hypothetical protein	0.673801	0.477237	0.123676	SA1399	-	NWMN_1473	hypothetical protein
NWMN_0009	hypothetical protein	3285	2824	1430	1796	3149	1613	1768	1905	1097	2471	2354	804	3054.5	2472.5	1836.5	2412.5	0.809461	0.601244	0.789818	E		NWMN_0759	extracellular matrix and plasma binding like	0.170095	0.334373	0.151842	SA0745	vwb	NWMN_0759	extracellular matrix and plasma binding like
NWMN_0010	hypothetical protein	3312	3387	2128	2213	3570	2412	2313	2336	2062	3122	2967	1393	3349.5	2891.5	2324.5	3044.5	0.863263	0.693984	0.908942	S		NWMN_0306	phiETA ORF57-like protein	0.386109	0.191791	0.152643	NA		NWMN_0306	phiETA ORF57-like protein
NWMN_0011	homoserine O-acetyltransferase	2776	3742	1763	1521.5	2883.5	1545.5	2092	2379	1917.5	2623	3319	1875	3259	2202.5	2235.5	2971	0.675821	0.685947	0.911629	E		NWMN_0861	oligopeptide ABC transporter substrate-binding protein	0.50926	0.343402	0.153228	SA0850	oppA	NWMN_0861	oligopeptide ABC transporter substrate-binding protein
NWMN_0012	hypothetical protein	10185	12800	4546	7886	10694	6339	7397	7931	5324	10317	10600	5223	11492.5	9290	7664	10458.5	0.808353	0.66687	0.910028	S		NWMN_0600	Na+/H+ antiporter	0.571167	0.453907	0.154244	SA0585	-	NWMN_0600	Na+/H+ antiporter
NWMN_0013	hypothetical protein	10533.5	13080.3	5217.18	8486.64	12250.4	7778.55	7824.82	8752.45	5978.36	10362.2	11452.1	6246	11806.9	10368.5	8288.64	10907.1	0.878172	0.702016	0.923793	T		NWMN_0412	staphylococcal tandem lipoprotein	0.834256	0.540859	0.165184	SA0397	lpl2	lpl9nm	staphylococcal tandem lipoprotein
NWMN_0014	50S ribosomal protein L9	19867	20643	11220	13050	20694	12377	14236	13139	10014	17536	18339	11274	20255	16872	13687.5	17937.5	0.83298	0.675759	0.885584	J		NWMN_0115	hypothetical protein	0.539669	1.50321	0.171323	SA0165	srpF	NWMN_0115	hypothetical protein
NWMN_0015	replicative DNA helicase	9075	9825	4828	5359	10541	6568	6673	5815	4496	7291	6769	4147	9450	7950	6244	7030	0.84127	0.660741	0.743915	L		NWMN_1166	30S ribosomal protein S2	0.780447	0.641563	0.188908	SA1099	rpsB	rpsB	30S ribosomal protein S2
NWMN_0016	adenylosuccinate synthetase	129.526	129.343	74.2743	135.631	186.994	97.7171	116.186	82.92	85.9943	106.211	101.62	55.1471	129.434	161.313	99.5529	103.916	1.24629	0.769138	0.802845	F		NWMN_2512	metallo-beta-lactamase super	0.624017	0.743706	0.195791		-	NWMN_2512	metallo-beta-lactamase super
NWMN_0017	two-component response regulator	13335	14972.7	5132.33	11669	18550.7	8309.33	11406.3	11596.3	5896	12411.3	12254.3	5300.67	14153.8	15109.8	11501.3	12332.8	1.06754	0.812595	0.871342	T		NWMN_0996	hypothetical protein	0.828524	0.31476	0.201325		-	NWMN_0996	hypothetical protein
NWMN_0018	sensory box histidine kinase VicK	14851	17515	8103	13616	19767	13315	12198	12916	8852	15255	15943	9144	16183	16691.5	12557	15599	1.03142	0.775938	0.963913	T		NWMN_0965	ABC transporter	0.281129	0.648427	0.21075	SA0950	potA	potA	ABC transporter
NWMN_0019	hypothetical protein	5347	7020	3686	4691	7449	5868	5277	5239	5202	6027	6573	4188	6183.5	6070	5258	6300	0.981645	0.850327	1.01884	S		NWMN_1331	acetyltransferase GNAT	0.311537	0.424863	0.229388	SA1252	-	NWMN_1331	acetyltransferase GNAT
NWMN_0020	hypothetical protein	6741	9504	5135	6396	10016	7260	7297	7320	6790	8690	9095	5670	8122.5	8206	7308.5	8892.5	1.01028	0.899785	1.0948	S		NWMN_1888	hypothetical protein	0.791063	0.522563	0.24327	SA1766	-	NWMN_1888	hypothetical protein
NWMN_0021	metallo-beta-lactamase super	469.2	816.8	223.6	637.3	678.5	238.3	525.8	419.9	244.6	604.6	467.6	146.3	643	657.9	472.85	536.1	1.02317	0.735381	0.833748	R		NWMN_1630	bifunctional 3-deoxy-7-phosphoheptulonate synthase/chorismate mutase	0.604131	0.644175	0.244025	SA1558	aroA	NWMN_1630	bifunctional 3-deoxy-7-phosphoheptulonate synthase/chorismate mutase
NWMN_0022	5'-nucleotidase	1923	2501	1160	1124	1882	752.5	1566	1509	849.9	2320	2219	778.8	2212	1503	1537.5	2269.5	0.679476	0.695072	1.02599	F		NWMN_0474	chaperonin HSP33	0.339508	0.468461	0.24467	SA0470	hslO	hslO	chaperonin HSP33
NWMN_0023	cassette chromosome attachment site ORF	1840	2874	774.5	1156	2016	650.3	1961	1503	722.5	1899	1692	628.2	2357	1586	1732	1795.5	0.672889	0.734832	0.761773	S		NWMN_1289	hypothetical protein	0.298991	0.708555	0.248633	SA1210	-	NWMN_1289	hypothetical protein
NWMN_0024	hypothetical protein	5520	8537	2328	3534	4935	1286	4008	3474	1728	4463	4948	1130	7028.5	4234.5	3741	4705.5	0.602476	0.532262	0.669489			NWMN_0456	dimethyladenosine transferase	0.890247	0.737018	0.250199	SA0451	ksgA	ksgA	dimethyladenosine transferase
NWMN_0026	hypothetical protein	1659	1888	821.9	1195	1273	852.8	1166	981.6	758.9	1805	1390	759.5	1773.5	1234	1073.8	1597.5	0.695799	0.605469	0.900761	R		NWMN_1872	cell surface protein mapW2	0.258497	0.485914	0.255936	SA1751	truncated mapW	map	cell surface protein mapW2
NWMN_0027	hypothetical protein	223.2	166	102.6	139.4	173.9	112.6	179.5	154.8	89.63	185	144.9	111.5	194.6	156.65	167.15	164.95	0.804985	0.858941	0.847636	O		NWMN_2393	staphylococcal accessory regulator T	0.558733	0.0957389	0.257947	SA2286	sarT	sarT	staphylococcal accessory regulator T
NWMN_0028	metallo-beta-lactamase super	700.4	445.8	333.4	534.3	541.5	563.6	620.1	527.7	350.9	504.8	409.3	412.8	573.1	537.9	573.9	457.05	0.93858	1.0014	0.797505	R		NWMN_1952	hypothetical protein	0.868452	0.747552	0.265298	SA1850	-	NWMN_1952	hypothetical protein
NWMN_0029	hypothetical protein	10996	4102	3917	3977	3925	5786	9769	3836	4000	3480	2784	3466	7549	3951	6802.5	3132	0.523381	0.901113	0.414889	R		NWMN_2048	hypothetical protein	0.605904	0.694864	0.269457	SA1946	ylbE	NWMN_2048	hypothetical protein
NWMN_0030	hypothetical protein	2260.6	1232.52	1831.8	1335.92	1202.4	2683	1814.4	834.36	2266.6	1103.4	941.4	2244	1746.56	1269.16	1324.38	1022.4	0.726663	0.758279	0.585379	J		NWMN_1709	lantibiotic ABC transporter protein	0.622408	0.427944	0.26981		epiG	bsaG	lantibiotic ABC transporter protein
NWMN_0031	hypothetical protein	1140	1176	814.1	922.6	923.3	531.2	977.6	951.6	628.5	1044	857.2	639.3	1158	922.95	964.6	950.6	0.797021	0.832988	0.820898	K		NWMN_0755	acetyltransferase	0.529417	0.613112	0.277505	SA0741	-	NWMN_0755	acetyltransferase
NWMN_0032	hypothetical protein	534.433	509.4	412.8	337.733	430.633	437.933	354.333	362.167	389.667	540.967	379.767	271.633	521.917	384.183	358.25	460.367	0.736101	0.686412	0.882069	G		NWMN_0288	hypothetical protein	0.707492	0.514446	0.278174		-	NWMN_0288	hypothetical protein
NWMN_0033	hypothetical protein	395.1	581.2	329.9	158.9	306	260.1	195.8	359.9	282.6	407	429.9	319.2	488.15	232.45	277.85	418.45	0.476186	0.56919	0.857216			NWMN_2095	PTS system lactose-specific IIA component	0.825276	0.326457	0.279048	SA1993	lacF	lacF	PTS system lactose-specific IIA component
NWMN_0034	hypothetical protein	317.3	347.5	137	153.6	220.5	196.5	151.1	210.6	213.3	254.8	230.5	208	332.4	187.05	180.85	242.65	0.562726	0.544073	0.729994	R		NWMN_2255	transcriptional regulator TetR	0.774123	0.487559	0.286103	SA2144	-	NWMN_2255	transcriptional regulator TetR
NWMN_0035	LysR family regulatory protein	1684	2684	635.9	1344	1670	518.7	1091	1245	591.1	1621	1538	502.2	2184	1507	1168	1579.5	0.690018	0.534799	0.723214	K		NWMN_0698	integral membrane domain-containing protein	0.391025	0.50762	0.286828	SA0684	-	NWMN_0698	integral membrane domain-containing protein
NWMN_0036	hypothetical protein	258.133	141	63.5433	90.07	87.5867	129.223	123.49	57.0633	112.577	74.3	77.74	75.3767	199.567	88.8283	90.2767	76.02	0.445106	0.452363	0.380925			NWMN_2464	phytoene dehydrogenase	0.325492	0.765381	0.28718	SA2351	crtI	crtI	phytoene dehydrogenase
NWMN_0037	hypothetical protein	675.1	837.7	72.53	639.7	646.4	220.2	567.6	268.6	194.7	519.1	490.5	150	756.4	643.05	418.1	504.8	0.850145	0.55275	0.667372	K		NWMN_1466	hypothetical protein	0.803344	0.564926	0.292023	SA1392	yqfL	NWMN_1466	hypothetical protein
NWMN_0038	hypothetical protein	834.75	1047.5	455.25	842.7	919.2	451.5	766	564.9	369.3	851.3	710.75	373.1	941.125	880.95	665.45	781.025	0.936061	0.707079	0.829884			NWMN_0085	phosphonates ABC transporter permease	0.179362	0.286386	0.293801	SA0136	phnE	NWMN_0085	phosphonates ABC transporter permease
NWMN_0039	hypothetical protein	5532	5824	3059	3766	4729	3289	3171	1013	2385	2474	3899	2301	5678	4247.5	2092	3186.5	0.748063	0.36844	0.561201	L		NWMN_0382	hypothetical protein	0.513044	0.51585	0.301075	SA0377	-	NWMN_0382	hypothetical protein
NWMN_0040	hypothetical protein	1280	1248	826.9	859.9	1073	1040	1099	855.7	956.3	1569	1204	918.9	1264	966.45	977.35	1386.5	0.764597	0.77322	1.09691			NWMN_2080	aerobactin biosynthesis protein	0.473204	0.630289	0.303367	SA1981	-	NWMN_2080	aerobactin biosynthesis protein
NWMN_0041	1-phosphatidylinositol phosphodiesterase	4362	5002	4615	1106	976.9	1339	5561	3251	5982	7120	8642	7947	4682	1041.45	4406	7881	0.222437	0.941051	1.68326			NWMN_1258	exonuclease SbcC	0.895089	0.33226	0.307561	SA1181	sbcC	sbcC	exonuclease SbcC
NWMN_0042	hypothetical protein	197.1	269.5	163.3	681.3	2.43	138.9	156.3	177.4	137.3	177.7	186	114.8	233.3	341.865	166.85	181.85	1.46535	0.715174	0.779468			NWMN_0007	histidine ammonia-lyase	2.24093	1.20603	0.310555	SA0008	hutH	hutH	histidine ammonia-lyase
NWMN_0043	hypothetical protein	273.8	346.6	111.8	184.5	255.3	179.2	167.1	136.2	116.2	165	157.4	121.7	310.2	219.9	151.65	161.2	0.708897	0.488878	0.519665			NWMN_0285	hypothetical protein	0.7962	0.516278	0.315289		-	NWMN_0285	hypothetical protein
NWMN_0044	hypothetical protein	603.2	496.5	299.4	426.7	572.8	456.5	405.2	356.9	316	427.2	383.1	270.3	549.85	499.75	381.05	405.15	0.908884	0.693007	0.736837			NWMN_0650	hypothetical protein	0.260017	1.0493	0.316012	SA0636	-	NWMN_0650	hypothetical protein
NWMN_0045	hypothetical protein	795.8	633.1	386.4	561.1	706.9	596.2	569.6	404	363	531.9	476.7	342.9	714.45	634	486.8	504.3	0.887396	0.681363	0.705858			NWMN_0792	hypothetical protein	0.465563	0.720464	0.320171	SA0781	fabK	NWMN_0792	hypothetical protein
NWMN_0046	AraC family transcription regulator	4918.43	6382.43	2357.86	3901.43	5554.14	3048.57	3140.14	3117.86	1918.14	4030	3781.71	1623.43	5650.43	4727.79	3129	3905.86	0.836713	0.553763	0.69125	K		NWMN_0294	hypothetical protein	1.32987	0.680056	0.323506		-	NWMN_0294	hypothetical protein
NWMN_0047	M20/M25/M40 family peptidase	29788	15151	16604	13723	15171	27725	16152	12853	15598	13004	11600	21246	22469.5	14447	14502.5	12302	0.64296	0.64543	0.547498	R		NWMN_2274	pyridine nucleotide-disulfide oxidoreductase	0.522458	0.587898	0.327238	SA2162	trxB2	NWMN_2274	pyridine nucleotide-disulfide oxidoreductase
NWMN_0048	drug transporter	14692.4	8964.14	8091.29	7600.43	8488.14	13701.7	9861	7365	7551.86	8298.86	7049.14	10180.7	11828.3	8044.29	8613	7674	0.680089	0.72817	0.648784	G		NWMN_1039	phage protein	0.956208	0.712174	0.327969		-	NWMN_1039	phage protein
NWMN_0049	Na/Pi cotransporter	1371	1278	746.7	1524	3109	2637	584.3	691.7	508.2	605.3	572.1	300.8	1324.5	2316.5	638	588.7	1.74896	0.481691	0.44447	P		NWMN_1696	hypothetical protein	0.50259	0.701369	0.33348		-	NWMN_1696	hypothetical protein
NWMN_0050	67 kDa Myosin-crossreactive streptococcal antigen-like protein	204.3	115.4	104.5	182.8	174	267.2	172.2	88.52	98.19	130.7	78.07	106.1	159.85	178.4	130.36	104.385	1.11605	0.815515	0.653018	S		NWMN_0876	GTP pyrophosphokinase	0.765555	0.263375	0.333918	SA0864	relQ	NWMN_0876	GTP pyrophosphokinase
NWMN_0051	integral membrane domain-containing protein	154	202	63.19	107.6	175.5	119.1	244.2	104.2	67.77	109.9	144.6	72.13	178	141.55	174.2	127.25	0.795225	0.978652	0.714888	G		NWMN_0648	acetyltransferase	0.395559	0.575399	0.34125	SA0634	rimL	NWMN_0648	acetyltransferase
NWMN_0052	transcriptional regulator GntR	381	565.9	119.69	356.15	281.7	137.91	465	195.7	160.6	425.55	268.25	101.96	473.45	318.925	330.35	346.9	0.673619	0.697751	0.732707	K		NWMN_2405	GTP pyrophosphokinase like	0.730343	0.452875	0.341573	SA2297	relP	NWMN_2405	GTP pyrophosphokinase like
NWMN_0053	hypothetical protein	11951	4672	8473	3234	3740	8823	9561	3998	10171	4410	4747	8912	8311.5	3487	6779.5	4578.5	0.419539	0.815677	0.550863	R		NWMN_2515	anaerobic ribonucleoside triphosphate reductase	0.45906	1.27374	0.346051	SA2410	nrdD	NWMN_2515	anaerobic ribonucleoside triphosphate reductase
NWMN_0054	L-lactate permease	24256	17370	14423	13729	14153	13309	28715	10591	12716	14530	12983	12650	20813	13941	19653	13756.5	0.669822	0.944266	0.660957	C		NWMN_0900	hypothetical protein	0.664749	0.3943	0.349968		-	NWMN_0900	hypothetical protein
NWMN_0055	protein A	30544	35261	32875	36780	23152	18986	37901	5422	5390	31327	10841	4352	32902.5	29966	21661.5	21084	0.910751	0.658354	0.640802	M		NWMN_0754	hypothetical protein	0.443766	0.560039	0.352624	SA0740	-	NWMN_0754	hypothetical protein
NWMN_0056	staphylococcal accessory regulator S	5361	5736	2446	3180	3165	1334	5931	2319	2295	5655	2819	1555	5548.5	3172.5	4125	4237	0.571776	0.743444	0.76363	K		NWMN_1186	transcriptional regulator GntR	0.534488	0.571111	0.354328	SA1120	-	NWMN_1186	transcriptional regulator GntR
NWMN_0057	lipoprotein SirC	250.7	420.6	160.2	164.2	275.5	148.4	185	187.6	132.9	223.2	234.4	131.8	335.65	219.85	186.3	228.8	0.654998	0.555042	0.681662	P		NWMN_1076	superantigen-like protein	0.38913	0.468207	0.35782	SA1010	ssl13	NWMN_1076	superantigen-like protein
NWMN_0058	lipoprotein SirB	264.9	396	161.2	173.5	236.5	120.9	264.6	195.6	142.2	227.1	225.4	146.1	330.45	205	230.1	226.25	0.620366	0.696323	0.684672	P		NWMN_0695	hypothetical protein	0.408269	0.860468	0.358416	SA0681	dgkA1	NWMN_0695	hypothetical protein
NWMN_0059	Iron-regulated ABC transporter siderophore-binding protein	312.4	589.6	129.8	222	245.6	97.52	414.7	193.1	113.5	283.4	265.6	80.58	451	233.8	303.9	274.5	0.518404	0.673836	0.608647	P		NWMN_1918	anti repressor	0.866624	0.28144	0.361192	SA1801	-	NWMN_1918	anti repressor
NWMN_0060	O-Acetyl serine sulfhydrylase	133.715	103.685	78.885	59.665	80.595	86.835	107.66	68.425	66.645	63.34	89.21	78.545	118.7	70.13	88.0425	76.275	0.590817	0.741723	0.642586	E		NWMN_0562	hypothetical protein	0.551576	0.369885	0.361805		-	NWMN_0562	hypothetical protein
NWMN_0061	ornithine cyclodeaminase	318.7	171.5	191	86.99	142.7	180	235.7	106.9	105.9	122.6	150.2	159.4	245.1	114.845	171.3	136.4	0.468564	0.698898	0.556508	E		NWMN_0846	LysR family regulatory protein	0.289649	0.384057	0.363939	SA0836	lysR	NWMN_0846	LysR family regulatory protein
NWMN_0062	siderophore biosynthesis IucC	141.1	94.49	71.63	74.43	100.8	101.3	102.2	97.75	80.84	107.2	116	123.6	117.795	87.615	99.975	111.6	0.743792	0.84872	0.947409	Q		NWMN_0658	hypothetical protein	0.70631	0.512016	0.366254	SA0644	-	NWMN_0658	hypothetical protein
NWMN_0063	membrane transporter protein	153.1	211.2	96.98	116.2	120.1	103.1	91.74	123.1	65.99	139.8	124.1	135	182.15	118.15	107.42	131.95	0.648641	0.589734	0.724403	G		NWMN_1514	peptidase U32	0.559247	0.591188	0.367746	SA1441	-	NWMN_1514	peptidase U32
NWMN_0064	siderophore biosynthesis IucA	278	343.1	156	151.4	186	254.9	152.6	180.6	128.5	210.1	202.7	187.2	310.55	168.7	166.6	206.4	0.54323	0.536468	0.664627	Q		NWMN_0352	hypothetical protein	0.549863	0.324107	0.368688		-	NWMN_0352	hypothetical protein
NWMN_0065	siderophore biosynthesis IucC	373.414	276.143	113.269	195.714	268.529	229.929	178.571	152.086	141.657	199.071	222.414	170.814	324.779	232.121	165.329	210.743	0.714707	0.50905	0.648882	Q		NWMN_2201	NAD/NADP octopine/nopaline dehydrogenase family protein	0.345904	0.628531	0.369944	SA2095	-	NWMN_2201	NAD/NADP octopine/nopaline dehydrogenase family protein
NWMN_0066	2-dehydro-3-deoxyglucarate aldolase	437.2	499.9	260.3	313.4	388.9	455.9	383.9	323.9	282	417.1	378.6	395.8	468.55	351.15	353.9	397.85	0.74944	0.755309	0.849109	G		NWMN_0892	serine protease HtrA	0.583989	0.491345	0.371243	SA0879	htrA	htrA	serine protease HtrA
NWMN_0067	diaminopimelate decarboxylase	617.4	483.8	304.1	361.1	491	560.8	347.2	369.9	305	531.2	454.2	372.8	550.6	426.05	358.55	492.7	0.773792	0.651199	0.894842	E		NWMN_2324	biotin synthase	0.630856	0.458043	0.371914	SA2213	bioB	bioB	biotin synthase
NWMN_0068	hypothetical protein	299.171	263.043	159	235.029	277.686	228.057	295.343	226.6	182.8	298.471	245.729	162.057	281.107	256.357	260.971	272.1	0.911955	0.92837	0.967958	K		NWMN_0321	oxidoreductase	0.562037	0.908935	0.37753	SA0317	-	NWMN_0321	oxidoreductase
NWMN_0069	hypothetical protein	242.3	594.3	185.5	486.5	485.7	197.1	356.3	445.3	297.5	416.4	399.6	158	418.3	486.1	400.8	408	1.16208	0.958164	0.975377			NWMN_2514	anaerobic ribonucleotide reductase small subunit	0.496389	1.35727	0.380057	SA2409	nrdG	NWMN_2514	anaerobic ribonucleotide reductase small subunit
NWMN_0070	hypothetical protein	2041	1475.5	818.1	1124	1255	658.45	1381.5	875.85	725.7	909.45	916.2	388.6	1758.25	1189.5	1128.67	912.825	0.676525	0.641931	0.519167			NWMN_0036	hypothetical protein	0.445106	0.452363	0.380925		-	NWMN_0036	hypothetical protein
NWMN_0071	acetoin reductase	9111.57	11958.4	7981.71	5745.14	8413.43	8391.43	7177.71	6271.71	6418.29	3960.97	9561.57	7953.57	10535	7079.29	6724.71	6761.27	0.671978	0.638321	0.641791	I		NWMN_0791	CBS domain-containing protein	0.485868	0.657871	0.38172	SA0780	-	NWMN_0791	CBS domain-containing protein
NWMN_0072	NAD dependent epimerase/dehydratase	252.1	262.3	92.07	87.84	102.8	49.44	165.1	132.1	103.4	256.5	166.9	98.13	257.2	95.32	148.6	211.7	0.370607	0.57776	0.823095	M		NWMN_0868	adaptor protein	0.707311	0.595555	0.381996	SA0857	mecA2	NWMN_0868	adaptor protein
NWMN_0073	capsular polysaccharide biosynthesis glycosyltransferase	183.2	207.2	92.92	72.94	83.49	44.58	85.25	102.8	68.75	172.1	112.8	75.94	195.2	78.215	94.025	142.45	0.400692	0.481685	0.729764	M		NWMN_1338	thymidylate synthase	0.389856	0.616105	0.386322	SA1260	thyA	thyA	thymidylate synthase
NWMN_0074	glycosyl transferase group 1	177.75	152.7	90.57	77.815	46.75	68.095	122.8	93.145	92.555	125.7	103.355	74.905	165.225	62.2825	107.972	114.528	0.376956	0.653488	0.693161	M		NWMN_0373	NAD(P)H-flavin oxidoreductase	0.967182	0.62534	0.389686	SA0367	nfrA	NWMN_0373	NAD(P)H-flavin oxidoreductase
NWMN_0075	hypothetical protein	143.571	138.457	49.5429	77.8029	99.44	43.6857	130.557	65.0557	53.5686	98.9186	86.5171	38.1386	141.014	88.6214	97.8064	92.7179	0.628457	0.693592	0.657507	M		NWMN_0943	cobalt transport	0.577408	0.220936	0.393778	SA0927	ykoC	NWMN_0943	cobalt transport
NWMN_0076	polysaccharide extrusion protein	851.329	524.643	269.257	567.129	537.814	663.4	665.429	280.291	379.8	470.014	406.357	496.886	687.986	552.471	472.86	438.186	0.803027	0.68731	0.636911	R		NWMN_1312	hypothetical protein	0.300783	0.600354	0.397372	SA1233	msa	NWMN_1312	hypothetical protein
NWMN_0077	superoxide dismutase	5112	10243	2341	4742	5734	1459	5294	4377	1881	6306	5851	1186	7677.5	5238	4835.5	6078.5	0.682253	0.629827	0.791729	P		NWMN_1575	lysine-specific permease	0.461607	0.660616	0.39777	SA1505	lysP	lysP	lysine-specific permease
NWMN_0078	cell wall surface anchor	15602	16996	12494	3613	5155	4414	20854	11120	13013	25181	22144	17599	16299	4384	15987	23662.5	0.268974	0.980858	1.45178	O		NWMN_2527	transcriptional regulator	0.829151	0.484058	0.398223	SA2421	slyA	NWMN_2527	transcriptional regulator
NWMN_0079	GntR family transcriptional regulator	1566	1745	662.8	1329	1752	886	1486	1082	711.2	1522	1184	692.9	1655.5	1540.5	1284	1353	0.930535	0.775596	0.817276	K		NWMN_1982	potassium-transporting ATPase subunit A	0.782333	0.647242	0.398595	SA1881	kdpA	kdpA	potassium-transporting ATPase subunit A
NWMN_0080	purine nucleoside phosphorylase	552.8	376.2	96.42	399.2	385.1	303.4	380.4	114.4	184.7	352.9	426.2	376.4	464.5	392.15	247.4	389.55	0.844241	0.532616	0.838644	F		NWMN_0878	RNA pseudouridylate synthase	0.810041	0.407657	0.399717	SA0866	yjbO	NWMN_0878	RNA pseudouridylate synthase
NWMN_0081	tetracycline resistance protein	829.4	581.1	385.5	647.9	832.6	655.4	641.2	501.6	411	657.3	631.8	566.6	705.25	740.25	571.4	644.55	1.04963	0.810209	0.913931	G		NWMN_0998	hypothetical protein	0.978563	0.427826	0.400227		-	NWMN_0998	hypothetical protein
NWMN_0083	phosphopentomutase	10049	9481	3353	5321	8167	6509	6135	426.3	4431	4209	7062	6319	9765	6744	3280.65	5635.5	0.69063	0.33596	0.577112	G		NWMN_1038	phage holin	1.0299	0.453107	0.400361		-	NWMN_1038	phage holin
NWMN_0084	phosphonates ABC transporter permease protein CC0363	178.1	196.5	132.9	89.79	141.9	112.5	184.1	170.7	127.1	193.7	213.7	128.5	187.3	115.845	177.4	203.7	0.6185	0.947144	1.08756	P		NWMN_1895	hypothetical protein	0.830462	0.545804	0.407345		-	NWMN_1895	hypothetical protein
NWMN_0085	phosphonates ABC transporter permease	456.8	2308	207	193.5	302.4	174	456.8	335	204.7	394.8	417.5	240.4	1382.4	247.95	395.9	406.15	0.179362	0.286386	0.293801	P		NWMN_1279	anthranilate synthase component I	0.480474	0.336284	0.408308	SA1199	trpE	trpE	anthranilate synthase component I
NWMN_0086	amino acid ABC transporter ATP-binding protein	331.9	457.3	214.5	143	222.7	140.7	243	284	233.4	365.5	389.6	210.8	394.6	182.85	263.5	377.55	0.463381	0.667765	0.956792	P		NWMN_0399	restriction modification system specificity subunit	0.667892	0.497638	0.409134	SA0392	hsdS	hsdS	restriction modification system specificity subunit
NWMN_0087	hypothetical protein	487.8	401.4	250.8	199.4	274.5	300.1	250.6	281.9	222.6	280.7	247.3	260.4	444.6	236.95	266.25	264	0.532951	0.598853	0.593792			NWMN_0999	hypothetical protein	0.890462	0.447104	0.409145		-	NWMN_0999	hypothetical protein
NWMN_0088	5' nucleotidase	796.2	998	641.4	648.3	786.8	575.1	674.9	504.2	595.6	640.2	843	652.5	897.1	717.55	589.55	741.6	0.799855	0.657173	0.826664	F		NWMN_0029	hypothetical protein	0.523381	0.901113	0.414889	SA0084	-	NWMN_0029	hypothetical protein
NWMN_0090	hypothetical protein	131.5	236	77.665	118.4	137.25	93.08	113.88	123.45	104.6	143.75	129.2	84.645	183.75	127.825	118.665	136.475	0.695646	0.645796	0.742721			NWMN_2003	beta-hydroxyacyl-ACP dehydratase	0.71122	0.745051	0.417942	SA1901	fabZ	fabZ	beta-hydroxyacyl-ACP dehydratase
NWMN_0091	replication initiation protein	220.1	248	106.9	188.8	202.4	114.5	207.8	142.9	116.1	136	240.5	92.65	234.05	195.6	175.35	188.25	0.835719	0.749199	0.804315			NWMN_1778	hypothetical protein	1.02636	0.574642	0.419632		-	NWMN_1778	hypothetical protein
NWMN_0092	hypothetical protein	604.7	882.7	246.3	433.7	784.4	514.6	415.4	379.1	290.7	467.4	437.1	243.6	743.7	609.05	397.25	452.25	0.818946	0.534154	0.608108			NWMN_0213	hypothetical protein	0.484774	0.640387	0.419794	SA0268	-	NWMN_0213	hypothetical protein
NWMN_0094	bifunctional acetaldehyde-CoA/alcohol dehydrogenase	2816	1482	2874	2156	2742	5202	2065	1884	3136	2007	2037	4120	2149	2449	1974.5	2022	1.1396	0.918799	0.940903	C		NWMN_2105	MerR family transcriptional regulator	2.07672	0.438588	0.420076	SA2002	-	NWMN_2105	MerR family transcriptional regulator
NWMN_0095	capsular polysaccharide biosynthesis protein CapA	20578.9	23771.4	14355.6	18852	28599.6	57588.4	21452.4	20517.1	24517.7	6248.71	14538.9	27960.9	22175.1	23725.8	20984.8	10393.8	1.06993	0.94632	0.468713	M		NWMN_1320	branched-chain amino acid transport system II carrier protein	0.807915	0.371187	0.420956	SA1239	braB	NWMN_1320	branched-chain amino acid transport system II carrier protein
NWMN_0096	capsular polysaccharide biosynthesis protein CapB	30084	39924	37511	31004	48587	65181	35961	43479	44841	20387	27381	51177	35004	39795.5	39720	23884	1.13688	1.13473	0.682322	D		NWMN_1811	phage anti-repressor	1.05584	0.478173	0.423985		-	NWMN_1811	phage anti-repressor
NWMN_0097	capsular polysaccharide biosynthesis protein CapC	18587.3	31567.6	22279.9	25483.7	34785.3	48381.4	24998.1	30855.1	24419	16758.9	20776.4	27015.3	25077.4	30134.5	27926.6	18767.6	1.20166	1.11362	0.748388	G		NWMN_2449	hypothetical protein	0.634841	0.431041	0.423992	SAS088	-	NWMN_2449	hypothetical protein
NWMN_0098	capsular polysaccharide biosynthesis protein CapD	14258	30682	15634	25984	34081	51451	16710	29596	16522	16345	17323	22429	22470	30032.5	23153	16834	1.33656	1.0304	0.749177	M		NWMN_1517	hypothetical protein	1.04664	0.737594	0.424033	SA1444	yrrK	NWMN_1517	hypothetical protein
NWMN_0099	capsular polysaccharide biosynthesis protein CapE	7079.71	23371.4	5186.71	15376.9	20417.9	20668.9	7292.43	10927.1	8635.29	7381.29	10039.7	9559.86	15225.6	17897.4	9109.77	8710.5	1.17548	0.598321	0.572097	M		NWMN_1855	hypothetical protein	0.447499	0.834181	0.424242	SA1733	-	NWMN_1855	hypothetical protein
NWMN_0100	capsular polysaccharide biosynthesis protein CapF	10028	31757.1	8147	20220.6	28173.6	24078	8509.86	26352.9	10032.1	14398.4	14935.9	12206.9	20892.6	24197.1	17431.4	14667.1	1.15817	0.834333	0.702027	M		NWMN_2325	adenosylmethionine-8-amino-7-oxononanoate aminotransferase	0.674533	0.437121	0.425901	SA2214	bioA	bioA	adenosylmethionine-8-amino-7-oxononanoate aminotransferase
NWMN_0101	capsular polysaccharide biosynthesis protein CapG	7038.86	21013.6	5788.29	11562.7	22571.1	15760.7	6911	22932.3	7557.57	10366.9	11345.3	8820	14026.2	17066.9	14921.6	10856.1	1.21679	1.06384	0.773984	M		NWMN_1894	hypothetical protein	0.944681	0.526179	0.426364		-	NWMN_1894	hypothetical protein
NWMN_0102	capsular polysaccharide biosynthesis protein CapH	9721	22915	6855	11315	22480	19244	7797	23415	9533	9880	14474	11423	16318	16897.5	15606	12177	1.03551	0.956367	0.746231	R		NWMN_2534	arginine deiminase	0.751668	0.801115	0.427863	SA2428	arcA	arcA	arginine deiminase
NWMN_0103	capsular polysaccharide biosynthesis protein CapI	4723	10290	3671	5311	11481	9823	4050	12829	4877	4944	6857	5871	7506.5	8396	8439.5	5900.5	1.1185	1.12429	0.786052	M		NWMN_1896	hypothetical protein	0.932689	0.612607	0.428096		-	NWMN_1896	hypothetical protein
NWMN_0104	capsular polysaccharide biosynthesis protein CapJ	5045	9139	3326	5171	12223	8300	4183	9517	4408	3817	7484	4602	7092	8697	6850	5650.5	1.22631	0.965877	0.796743			NWMN_1913	hypothetical protein	0.490809	0.370829	0.432434		-	NWMN_1913	hypothetical protein
NWMN_0105	capsular polysaccharide biosynthesis protein CapK	7023	9433	4130	6959	13723	9684	4751	9882	4889	4092	9095	4977	8228	10341	7316.5	6593.5	1.25681	0.88922	0.801349			NWMN_0858	oligopeptide transport ATP-binding protein	0.730056	0.383351	0.434045	SA0847	oppD	oppD	oligopeptide transport ATP-binding protein
NWMN_0106	capsular polysaccharide biosynthesis protein CapL	4579	4947	2665	4025	10498	6933	2808	6373	3537	2904	5938	3939	4763	7261.5	4590.5	4421	1.52456	0.963783	0.928197	M		NWMN_1425	DNA repair protein RecN	0.612324	0.574649	0.437207	SA1350	recN	recN	DNA repair protein RecN
NWMN_0107	capsular polysaccharide biosynthesis protein CapM	7636	7752	4068	6885	15745	10887	4456	9130	5693	4728	8706	6128	7694	11315	6793	6717	1.47063	0.882896	0.873018	M		NWMN_2296	hypothetical protein	1.06767	0.41775	0.437719	SA2184	narH	narH	hypothetical protein
NWMN_0108	capsular polysaccharide biosynthesis protein CapN	5748.43	6474.71	3172.29	5299.14	11351.3	8436	3323	6581	3847.86	3772.71	8149.86	4113.29	6111.57	8325.21	4952	5961.29	1.36221	0.810266	0.97541	M		NWMN_2465	hypothetical protein	0.433747	0.787419	0.438646	SA2352	crtO	NWMN_2465	hypothetical protein
NWMN_0109	capsular polysaccharide biosynthesis protein CapO	5993	6818	3317	5414	14532	8686	3666	6592	3868	3918	7521	4049	6405.5	9973	5129	5719.5	1.55694	0.800718	0.892905	M		NWMN_1180	tRNA pseudouridine synthase B	0.32898	0.849537	0.439119	SA1114	truB	truB	tRNA pseudouridine synthase B
NWMN_0110	capsular polysaccharide biosynthesis protein CapP	3864	4502	2153	4025	8486	4743	2277	4095	2678	2985	5129	2509	4183	6255.5	3186	4057	1.49546	0.761654	0.969878	M		NWMN_2416	phospholipase/carboxylesterase	0.527568	0.780416	0.43917	SA2306	-	NWMN_2416	phospholipase/carboxylesterase
NWMN_0111	heme-degrading monooxygenase IsdI	71.78	118.4	36.43	55.72	126.9	89.57	56.87	62.84	41.9	63.54	75.64	29.99	95.09	91.31	59.855	69.59	0.960248	0.629456	0.731833	R		NWMN_2417	hypothetical protein	0.58831	0.657109	0.439438	SA2307	-	NWMN_2417	hypothetical protein
NWMN_0112	hypothetical protein	330.6	574.5	243.3	257.5	345.6	207.7	550.8	274.9	214.9	448.7	363.6	173.6	452.55	301.55	412.85	406.15	0.666335	0.912275	0.89747	S		NWMN_0604	iron dependent repressor	0.859096	0.555286	0.439928	SA0590	sirR	feoA	iron dependent repressor
NWMN_0113	aldehyde dehydrogenase	17684	35814	5424	19500	33142	6417	12837	20603	5075	16629	22173	3947	26749	26321	16720	19401	0.983999	0.62507	0.725298	C		NWMN_0720	hypothetical protein	0.760705	0.573787	0.440433	SA0706	comFC	NWMN_0720	hypothetical protein
NWMN_0114	cation efflux	1771	976.2	1915	735.9	863.4	2210	1913	710.9	2398	833.8	705.4	1951	1373.6	799.65	1311.95	769.6	0.582156	0.955118	0.56028	P		NWMN_0049	Na/Pi cotransporter	1.74896	0.481691	0.44447	SA0100	nptA	NWMN_0049	Na/Pi cotransporter
NWMN_0115	hypothetical protein	272.3	307.5	68.79	158.3	154.6	158.9	822.2	49.36	144.4	8.913	90.42	153.1	289.9	156.45	435.78	49.6665	0.539669	1.50321	0.171323			NWMN_0645	hypothetical protein	0.579041	0.624515	0.445326	SA0631	-	NWMN_0645	hypothetical protein
NWMN_0116	hypothetical protein	31.68	13.96	12.83	15.6	14.51	23.61	38.63	22.83	19.94	20.86	20.35	20.58	22.82	15.055	30.73	20.605	0.659728	1.34663	0.902936	P		NWMN_0477	dihydroneopterin aldolase	0.937074	0.443139	0.450227	SA0473	folB	folB	dihydroneopterin aldolase
NWMN_0117	hypothetical protein	151.3	114.8	67.27	108.8	131.4	97.39	147.7	270	77.07	127.4	108.5	116.6	133.05	120.1	208.85	117.95	0.902668	1.56971	0.886509	P		NWMN_1931	iron compound ABC transporter iron compound-binding protein	0.531611	0.445258	0.453739		fhuD1	NWMN_1931	iron compound ABC transporter iron compound-binding protein
NWMN_0118	ABC transporter permease protein	254.2	230.6	126	209.3	226.9	208.4	257	166.9	148.8	218.7	213.6	166.8	242.4	218.1	211.95	216.15	0.899752	0.874381	0.891708	P		NWMN_0179	transcriptional antiterminator BglG	0.53403	0.363642	0.455481	SA0235	bglG	NWMN_0179	transcriptional antiterminator BglG
NWMN_0119	hypothetical protein	1097	476	545	486.4	434.7	838.6	992.9	391.4	447.4	664.8	364.6	570.3	786.5	460.55	692.15	514.7	0.585569	0.880038	0.654418	I		NWMN_0553	mevalonate kinase	0.469338	0.828427	0.457618	SA0547	mvaK1	mvaK1	mevalonate kinase
NWMN_0120	hypothetical protein	2164.67	3227.67	1017.07	1536	2110.67	1224	2945.33	1840.67	1132.33	2463	1694	885.233	2696.17	1823.33	2393	2078.5	0.676269	0.887556	0.770909	S		NWMN_1187	hypothetical protein	0.529248	0.841605	0.457787	SA1121	-	NWMN_1187	hypothetical protein
NWMN_0121	formate dehydrogenase	124.85	265.9	101.84	110.15	182.3	151.5	82.975	75.655	137	196.95	139.55	104	195.375	146.225	79.315	168.25	0.748433	0.405963	0.861164	C		NWMN_0536	proline/betaine transporter	0.863384	1.25228	0.457933	SA0531	proP	NWMN_0536	proline/betaine transporter
NWMN_0122	drug transporter	3051	4209	1745	1966	2187	1611	2767	2331	1757	4219	3220	1683	3630	2076.5	2549	3719.5	0.572039	0.702204	1.02466	G		NWMN_0512	2-amino-3-ketobutyrate coenzyme A ligase	0.924071	0.651416	0.460764	SA0508	kbl	NWMN_0512	2-amino-3-ketobutyrate coenzyme A ligase
NWMN_0123	gramicidin S synthetase 2 related protein	4553	3658	2594	2042	2772	2897	3865	2843	3277	4295	4244	4259	4105.5	2407	3354	4269.5	0.586287	0.816953	1.03995	Q		NWMN_1663	hypothetical protein	0.532689	0.941615	0.461692	SA1590	-	NWMN_1663	hypothetical protein
NWMN_0124	4'-phosphopantetheinyl transferase super	4064	2751	2731	1653	2020	2803	4542	2450	3142	3966	3065	3443	3407.5	1836.5	3496	3515.5	0.538958	1.02597	1.03169	H		NWMN_0183	sorbitol dehydrogenase	0.628573	0.437972	0.462828	SA0239	gutB	NWMN_0183	sorbitol dehydrogenase
NWMN_0125	hypothetical protein	1973	2009	1593	1806	2428	1744	2289	1768	1741	1811	1890	1392	1991	2117	2028.5	1850.5	1.06328	1.01883	0.929432	S		NWMN_1732	hypothetical protein	0.730098	0.550198	0.463624	SA1658	-	NWMN_1732	hypothetical protein
NWMN_0126	acetylglutamate kinase	480.5	559.1	359.8	276.5	537.7	397.9	363.7	390.8	354.6	380.9	471.9	361.2	519.8	407.1	377.25	426.4	0.783186	0.72576	0.820316	E		NWMN_2533	ornithine carbamoyltransferase	0.752105	0.835526	0.464989	SA2427	arcB	arcB	ornithine carbamoyltransferase
NWMN_0127	bifunctional ornithine acetyltransferase/N-acetylglutamate synthase protein	470.9	632	321.3	255.6	533.6	355.7	329.5	337.8	385	356.5	485.7	319.6	551.45	394.6	333.65	421.1	0.715568	0.605041	0.763623	E		NWMN_1892	hypothetical protein	0.897256	0.583095	0.465093	NA		NWMN_1892	hypothetical protein
NWMN_0128	N-acetyl-gamma-glutamyl-phosphate reductase	408.1	563.3	219.1	174.8	411	217.3	176.1	268.2	194	258.1	389.3	172.4	485.7	292.9	222.15	323.7	0.603047	0.457381	0.666461	E		NWMN_1299	phosphate ABC transporter permease protein	1.63772	0.44322	0.467411	SA1220	pstC	NWMN_1299	phosphate ABC transporter permease protein
NWMN_0129	ornithine aminotransferase	468.15	619.15	289.1	245.1	469.6	262.7	195.3	332.45	249.95	307.9	433.95	203.2	543.65	357.35	263.875	370.925	0.657316	0.485377	0.682286	E		NWMN_0095	capsular polysaccharide biosynthesis protein CapA	1.06993	0.94632	0.468713	SA0144	capA	capA	capsular polysaccharide biosynthesis protein CapA
NWMN_0130	branched-chain amino acid transport system II carrier protein	3925.57	5091.71	1570.57	2872.29	3252.43	1097.29	3134.57	2254.29	1099.69	3866.14	2721.86	945.857	4508.64	3062.36	2694.43	3294	0.679219	0.597614	0.730597	E		NWMN_0434	hypothetical protein	0.925761	0.498806	0.468876	SA0428	-	NWMN_0434	hypothetical protein
NWMN_0131	isochorismatase	1081.85	1361.5	659.15	744.35	1032.05	684.6	890.5	876.75	601	1173.5	928.25	466.95	1221.67	888.2	883.625	1050.88	0.727035	0.72329	0.860192	Q		NWMN_2297	nitrate reductase alpha subunit	1.16254	0.386162	0.469173	SA2185	narG	narG	nitrate reductase alpha subunit
NWMN_0132	indolepyruvate decarboxylase	4463	7154	1780	3904	5579	1893	3084	4107	1372	5200	4892	1386	5808.5	4741.5	3595.5	5046	0.816304	0.619007	0.868727	G		NWMN_0801	D-isomer specific 2-hydroxyacid dehydrogenase NAD binding domain-containing protein	0.692469	0.616142	0.470645	SA0791	ghrB	NWMN_0801	D-isomer specific 2-hydroxyacid dehydrogenase NAD binding domain-containing protein
NWMN_0133	PTS enzyme II glucose-specific factor IIABC component	5593.57	6824.14	3682.43	4548.57	6704.14	4603.86	3965.14	4312.86	3165.14	4624.29	5175.29	2892.57	6208.86	5626.36	4139	4899.79	0.906182	0.666628	0.789161	G		NWMN_0649	hypothetical protein	0.363819	1.18773	0.472924	SA0635	yvdD	NWMN_0649	hypothetical protein
NWMN_0134	hypothetical protein	48835	37373	30971	20356	24519	24158	38319	32270	30347	40868	39961	34704	43104	22437.5	35294.5	40414.5	0.520543	0.818822	0.937604	S		NWMN_2558	hypothetical protein	0.593612	0.665911	0.473967	SA2452	-	NWMN_2558	hypothetical protein
NWMN_0135	N-acetylmuramic acid-6-phosphate etherase	30537	27457.5	17323	12905	13538	12942	24330.5	18046.5	16184.5	26216	27232	22549.5	28997.2	13221.5	21188.5	26724	0.455957	0.730707	0.921605	R		NWMN_0590	hypothetical protein	0.735047	0.527497	0.474371	SA0574	-	NWMN_0590	hypothetical protein
NWMN_0136	PTS system sucrose specific IIBC component	55427	49561	10131	21125	18586	17868	37460	357.8	26160	19922	42372	35324	52494	19855.5	18908.9	31147	0.378243	0.360211	0.593344	G		NWMN_1738	hypothetical protein	0.536479	0.940046	0.477791	SA1664	-	NWMN_1738	hypothetical protein
NWMN_0137	RpiR family phosphosugar-binding transcriptional regulator	13922	12158	9046.33	6170	6445	5710.67	15108.3	9087.33	8797	13129.7	12947	10937	13040	6307.5	12097.8	13038.3	0.483704	0.927748	0.999872	K		NWMN_0719	comf operon protein 1	0.504952	1.385	0.477914	SA0705	comFA	NWMN_0719	comf operon protein 1
NWMN_0138	hypothetical protein	826.7	928.4	432.7	521.1	604.9	394.9	852.9	562.9	511.6	709.9	696.1	336	877.55	563	707.9	703	0.641559	0.806678	0.801094			NWMN_0738	hypothetical protein	0.663926	0.722675	0.478147	SA0725	-	NWMN_0738	hypothetical protein
NWMN_0139	HsdR family type I site-specific deoxyribonuclease	5224	5305	3147	2923	4341	1557	4815	3761	2804	5115	4902	2368	5264.5	3632	4288	5008.5	0.689904	0.814512	0.951372	V		NWMN_0690	ABC transporter	0.598195	0.759415	0.479181	SA0677	-	NWMN_0690	ABC transporter
NWMN_0140	hypothetical protein	6094	8531	4178	4967	5966	3997	5632	4523	3959	7301	5580	3124	7312.5	5466.5	5077.5	6440.5	0.747556	0.694359	0.880752			NWMN_1893	hypothetical protein	1.02785	0.544958	0.480706		-	NWMN_1893	hypothetical protein
NWMN_0141	hypothetical protein	4943	6660	3021	3423	4381	2756	3652	3198	2854	5575	3517	2344	5801.5	3902	3425	4546	0.672585	0.590365	0.78359			NWMN_1698	hypothetical protein	0.533491	0.652466	0.48161		-	NWMN_1698	hypothetical protein
NWMN_0142	hypothetical protein	5616	7290	4159	3534	5367	3373	5349	4351	4392	6166	4160	2942	6453	4450.5	4850	5163	0.689679	0.751588	0.800093			NWMN_2531	carbamate kinase	0.732509	0.786255	0.481923	SA2425	arcC	arcC	carbamate kinase
NWMN_0143	peptide ABC transporter ATP-binding protein	900.9	745.3	429.6	513.1	811.6	554.5	588.7	485.5	315.2	415.6	656.5	390.4	823.1	662.35	537.1	536.05	0.804702	0.652533	0.651257	R		NWMN_1450	hypothetical protein	0.643859	0.614948	0.483812	SA1376	-	NWMN_1450	hypothetical protein
NWMN_0144	oligopeptide ABC transporter permease protein	91.35	167.7	15.42	71.51	87.4	28.78	78.81	50.85	18.09	57.4	80.37	15.94	129.525	79.455	64.83	68.885	0.613434	0.500521	0.531828	E		NWMN_0742	phosphoglycerate kinase	0.836921	0.309391	0.486072	SA0728	pgk	pgk	phosphoglycerate kinase
NWMN_0145	peptide ABC transporter permease protein	204.3	232.8	103.1	144.6	192.6	95.65	220.7	157.7	111.3	175.7	221.8	85.75	218.55	168.6	189.2	198.75	0.771448	0.865706	0.909403	E		NWMN_0349	bifunctional homocysteine S-methyltransferase/5,10-methylenetetrahydrofolate reductase protein	0.286392	0.545	0.49017	SA0345	metH	metH	bifunctional homocysteine S-methyltransferase/5,10-methylenetetrahydrofolate reductase protein
NWMN_0146	RGD-containing lipoprotein	411.1	403.2	252.8	274.3	364.6	221	390.8	271.5	236.8	264.6	358.9	219.8	407.15	319.45	331.15	311.75	0.7846	0.813337	0.765688	E		NWMN_2035	hypothetical protein	1.01758	0.554161	0.490319	SA1933	-	NWMN_2035	hypothetical protein
NWMN_0147	gamma-glutamyltranspeptidase	365.9	460.8	167.4	196.8	280.8	208.2	375.8	191.3	162.2	221.6	247.3	153.1	413.35	238.8	283.55	234.45	0.577719	0.68598	0.567195	E		NWMN_2463	glycosyl transferase group 2	0.47992	1.10257	0.491104	SA2350	crtQ	NWMN_2463	glycosyl transferase group 2
NWMN_0148	hypothetical protein	440.76	764.9	227.72	379.78	576.08	245.98	493.7	491.16	253.38	398.62	456.6	5541.68	602.83	477.93	492.43	427.61	0.792811	0.816864	0.709338			NWMN_2102	hypothetical protein	0.7638	0.614975	0.491147	SAS075	-	NWMN_2102	hypothetical protein
NWMN_0149	FMN-dependent NADH-azoreductase	682.8	1021	359.2	557.5	815.4	320.3	746.5	500.3	314.5	659.9	592.6	284.7	851.9	686.45	623.4	626.25	0.805787	0.731776	0.735121	I		NWMN_2532	arginine/ornithine antiporter	0.527284	0.775481	0.491971	SA2426	arcD	arcD	arginine/ornithine antiporter
NWMN_0150	M23/M37 peptidase domain-containing protein	642.171	1271.74	366	775.614	1278.1	591.271	348.929	579.114	295.057	529.214	625.271	237.829	956.957	1026.86	464.021	577.243	1.07304	0.484893	0.603207	M		NWMN_0350	trans-sulfuration enzyme	0.300632	0.464528	0.493617	SA0346	metC2	NWMN_0350	trans-sulfuration enzyme
NWMN_0151	multiple sugar-binding transport ATP-binding protein	388.3	489.6	111.7	340.3	388.1	86.12	248.5	317.5	83.25	356.4	324.8	102.2	438.95	364.2	283	340.6	0.829707	0.64472	0.775943	G		NWMN_0995	bacteriophage L54a antirepressor	1.11169	0.427907	0.494858		-	NWMN_0995	bacteriophage L54a antirepressor
NWMN_0152	maltose ABC transporter, maltose-binding protein	539.3	742.3	230.9	503.5	660.2	154.3	365.5	369.1	169.7	488.2	532	166.3	640.8	581.85	367.3	510.1	0.908006	0.57319	0.796036	G		NWMN_0941	bifunctional phosphoribosylaminoimidazolecarboxamide formyltransferase/IMP cyclohydrolase	0.736862	0.471058	0.495029	SA0925	purH	purH	bifunctional phosphoribosylaminoimidazolecarboxamide formyltransferase/IMP cyclohydrolase
NWMN_0153	maltose ABC transporter permease protein	1777	1291.95	1018.45	918.1	1371	1166.5	1191.4	867.85	920.1	1130.2	1273.5	995.5	1534.47	1144.55	1029.62	1201.85	0.74589	0.670995	0.783232	G		NWMN_0268	anti repressor	1.05684	0.476182	0.49829		-	NWMN_0268	anti repressor
NWMN_0154	maltose ABC transporter permease protein	1425	882.314	776.357	669.814	1116.8	1085.66	1040.66	681.171	753.086	812.314	996.771	797.657	1153.66	893.307	860.914	904.543	0.774326	0.746248	0.784066	G		NWMN_0430	hypothetical protein	1.06748	0.473402	0.498472	SA0424	-	NWMN_0430	hypothetical protein
NWMN_0155	hypothetical protein	2047	1709	1450	1323	1834	1880	1826	1487	1200	1556	1754	1435	1878	1578.5	1656.5	1655	0.840522	0.882055	0.881257	R		NWMN_1046	NPQTN-specific sortase B	0.406845	0.450899	0.498768	SA0982	srtB	srtB	NPQTN-specific sortase B
NWMN_0156	xylose phosphate isomerases	903.467	690.333	696.767	619.6	589.2	614.9	1085.67	455.7	658.967	770.133	808.167	694.267	796.9	604.4	770.683	789.15	0.758439	0.967102	0.990275	G		NWMN_0205	ribose transcriptional repressor RbsR	0.566211	0.82435	0.498906	SA0261	rbsR	rbsR	ribose transcriptional repressor RbsR
NWMN_0157	hypothetical protein	150.4	80.5	52.1	124.4	93.22	77.02	141.9	63.12	81.52	150.9	93.13	81.52	115.45	108.81	102.51	122.015	0.942486	0.887917	1.05686	S		NWMN_0802	hypothetical protein	1.0905	0.432395	0.49919	SA0792	dltX	NWMN_0802	hypothetical protein
NWMN_0158	sugar phosphate antiporter	352.26	329.74	152.52	299.72	274.58	152.84	324.86	152.16	147.04	273.48	223.36	140.08	341	287.15	238.51	248.42	0.842082	0.699443	0.728505	G		NWMN_1305	aspartate semialdehyde dehydrogenase	0.674764	0.26589	0.500315	SA1226	asd	asd	aspartate semialdehyde dehydrogenase
NWMN_0159	AraC family DNA-binding response regulator	1003.43	980.433	588.667	607.267	791.8	491.567	870.867	514.53	533.2	674.67	779.867	506.933	991.933	699.533	692.698	727.268	0.705222	0.698331	0.733183	T		NWMN_0901	membrane protein	0.638697	0.511722	0.500371	SA0886	-	NWMN_0901	membrane protein
NWMN_0160	sensor histidine kinase	1207	1154	619	687.4	978.1	701.1	737.7	564.9	507.9	846.1	839.2	469.1	1180.5	832.75	651.3	842.65	0.705421	0.551715	0.713808	T		NWMN_0554	mevalonate diphosphate decarboxylase	0.565082	0.995889	0.500818	SA0548	mvaD	mvaD	mevalonate diphosphate decarboxylase
NWMN_0161	lipoprotein	1398	1476	528.5	798.1	1276	617.9	793.3	841.1	440	1084	1022	320.6	1437	1037.05	817.2	1053	0.721677	0.568685	0.732777	P		NWMN_2358	hypothetical protein	0.706745	0.512663	0.502494	SA2249	-	NWMN_2358	hypothetical protein
NWMN_0162	formate acetyltransferase	65177	21000	48036	58719	31732	65149	64640	19012	26291	39094	21513	45629	43088.5	45225.5	41826	30303.5	1.0496	0.9707	0.703285	C		NWMN_0631	ABC transporter permease	0.936155	0.473754	0.50258	SA0617	vraG	vraG	ABC transporter permease
NWMN_0163	pyruvate formate-lyase 1 activating enzyme	65177	16392	43343	40154	32129	61895	65161	17910	27708	35678	17880	37585	40784.5	36141.5	41535.5	26779	0.886158	1.01841	0.656597	O		NWMN_1160	DNA topoisomerase I	0.736578	0.639819	0.503052	SA1093	topA	topA	DNA topoisomerase I
NWMN_0164	hypothetical protein	1558	1483	553.9	1436	1254	426.5	1350	796.2	340	1203	946.6	233.6	1520.5	1345	1073.1	1074.8	0.884577	0.705755	0.706873	C		NWMN_1736	DNA repair exonuclease	0.678748	0.559348	0.504324	SA1662	sbcD	NWMN_1736	DNA repair exonuclease
NWMN_0165	hypothetical protein	94.0857	73.2471	22.777	68.6457	48.2471	35.8614	112.63	50.4514	49.6663	162.583	74.4486	40.3243	83.6664	58.4464	81.5407	118.516	0.698565	0.974593	1.41653			NWMN_1910	hypothetical protein	0.549853	0.485205	0.504978	SA1793	-	NWMN_1910	hypothetical protein
NWMN_0166	staphylocoagulase	68.55	60.25	32.31	63.65	70.91	59.53	35.31	47.51	50.08	77.87	63.39	45.52	64.4	67.28	41.41	70.63	1.04472	0.643012	1.09674			NWMN_0756	clumping factor	0.545134	1.05018	0.506071	SA0742	clfA	clfA	clumping factor
NWMN_0167	acetyl-CoA acetyltransferase	2766	6588	4086	1737	7773	4306	1653	5128	3290	1994	5623	3260	4677	4755	3390.5	3808.5	1.01668	0.724931	0.814304	I		NWMN_2146	30S ribosomal protein S3	1.10705	0.278626	0.506792	SA2041	rpsC	rpsC	30S ribosomal protein S3
NWMN_0168	3-hydroxyacyl-CoA dehydrogenase FadB-like protein	3177.14	5731	2734	1370	5454.57	3982.71	991.286	3222.29	2567.71	1711.29	4780.14	2872.57	4454.07	3412.29	2106.79	3245.71	0.766105	0.473002	0.728707	I		NWMN_1314	hypothetical protein	0.780962	0.520387	0.508218	SA1235	-	NWMN_1314	hypothetical protein
NWMN_0169	glutaryl-CoA dehydrogenase FadD-like protein	6805	11692	4994	2375	11605	6458	1694	5895	4295	2900	10062	4413	9248.5	6990	3794.5	6481	0.755798	0.410283	0.700762	I		NWMN_2299	assimilatory nitrite reductase [NAD(P)H] small subunit	1.06232	0.542394	0.508353	SA2187	nasE	nirD	assimilatory nitrite reductase [NAD(P)H] small subunit
NWMN_0170	acyl-CoA synthetase FadE-like protein	6016	13683	4988	2930	13167	6773	1798	2875	4697	1075	11026	4673	9849.5	8048.5	2336.5	6050.5	0.817148	0.23722	0.614295	I		NWMN_2005	hypothetical protein	0.559912	0.732122	0.508643	SA1903	-	NWMN_2005	hypothetical protein
NWMN_0171	acetyl-CoA/acetoacetyl-CoA transferase	7487	20469	5933	4225	19844	7838	2001	9473	4757	4857	14315	4832	13978	12034.5	5737	9586	0.86096	0.410431	0.685792	I		NWMN_2328	ABC transporter ATP-binding protein membrane	0.406053	0.470788	0.508982	SA2217	-	NWMN_2328	ABC transporter ATP-binding protein membrane
NWMN_0172	hypothetical protein	783	1172	433.967	648.7	804.467	310.447	727.333	618.2	402.133	1083.87	887.4	369.2	977.5	726.583	672.767	985.633	0.743308	0.688252	1.00832	S		NWMN_2235	formimidoylglutamase	0.601056	0.987264	0.510559	SA2125	hutG	hutG	formimidoylglutamase
NWMN_0173	ABC transporter substrate-binding protein	128.95	90.37	57.28	79.39	88.85	92.46	147.35	81.565	68.31	89.65	80.11	60.19	109.66	84.12	114.457	84.88	0.767098	1.04375	0.774029	E		NWMN_0723	peptide chain release factor 2	1.00304	0.352244	0.510657	SA0709	prfB	prfB	peptide chain release factor 2
NWMN_0174	hypothetical protein	417.5	365	261.3	355.4	320.7	346.2	650	243.3	214.3	439.9	211.2	194.5	391.25	338.05	446.65	325.55	0.864026	1.1416	0.832077	S		NWMN_1181	riboflavin biosynthesis protein RibF	0.545698	0.88202	0.510909	SA1115	ribC	ribF	riboflavin biosynthesis protein RibF
NWMN_0175	globin domain-containing protein	896.1	737.1	551.8	899	1096	911.1	1104	567.9	480.1	658.6	470.7	343.5	816.6	997.5	835.95	564.65	1.22153	1.0237	0.691465	C		NWMN_1194	recombinase A	0.700026	0.772686	0.512159	SA1128	recA	recA	recombinase A
NWMN_0176	L-lactate dehydrogenase	42263	18833	32889	38024	43973	53618	37605	23120	32076	43408	22666	32396	30548	40998.5	30362.5	33037	1.3421	0.993928	1.08148	C		NWMN_0188	teichoic acid biosynthesis protein F	1.14438	0.578969	0.513628	SA0244	tagF	NWMN_0188	teichoic acid biosynthesis protein F
NWMN_0177	PTS system glucose-specific IIBC component	712.8	476.4	396.4	522.3	702.2	723.5	546.8	345.8	326.4	624	392.6	392.5	594.6	612.25	446.3	508.3	1.02968	0.750589	0.85486	G		NWMN_0902	hypothetical protein	0.535111	0.677554	0.516358	SA0887	-	NWMN_0902	hypothetical protein
NWMN_0178	inosine-uridine preferring nucleoside hydrolase	709.4	810.4	335.9	496.4	761.3	274.7	614	524	270.5	548.2	584.7	270	759.9	628.85	569	566.45	0.827543	0.748783	0.745427	F		NWMN_2058	transcriptional antiterminator BglG	0.829247	0.834428	0.516851	SA1961	bglG	NWMN_2058	transcriptional antiterminator BglG
NWMN_0179	transcriptional antiterminator BglG	101.5	195	51.62	78.38	79.96	76.2	49.63	58.19	46.32	62.96	72.09	40.4	148.25	79.17	53.91	67.525	0.53403	0.363642	0.455481	G		NWMN_2432	hypothetical protein	1.52701	0.987613	0.518463	SA2321	-	NWMN_2432	hypothetical protein
NWMN_0180	phosphoenolpyruvate-dependent sugar phosphotransferase system EIIA 2	93.32	68.71	40.24	85.55	93.18	50.28	64.23	59	60.66	70.54	73.22	48.52	81.015	89.365	61.615	71.88	1.10307	0.760538	0.887243	G		NWMN_0070	hypothetical protein	0.676525	0.641931	0.519167	SA0121	-	NWMN_0070	hypothetical protein
NWMN_0181	PTS system component	129.7	100.2	62.78	113.3	104.8	81.03	73.37	91.01	64.07	80.57	85.51	86.55	114.95	109.05	82.19	83.04	0.948673	0.715007	0.722401	G		NWMN_0043	hypothetical protein	0.708897	0.488878	0.519665	SA0093	-	NWMN_0043	hypothetical protein
NWMN_0182	PTS system component	121.5	114.4	99.28	153.2	145.2	148	109.7	217.6	85.96	114.7	117.5	96.84	117.95	149.2	163.65	116.1	1.26494	1.38745	0.984315	G		NWMN_1821	ribonuclease BN (tRNA maturation)	0.500954	1.12977	0.519673	SA1699	yihY	NWMN_1821	ribonuclease BN (tRNA maturation)
NWMN_0183	sorbitol dehydrogenase	309.771	651.771	145.3	269.829	334.571	228.871	210.386	210.743	133.6	217.529	227.5	157.386	480.771	302.2	210.564	222.514	0.628573	0.437972	0.462828	E		NWMN_0784	hypothetical protein	0.527178	0.640452	0.520578	SA0773	-	NWMN_0784	hypothetical protein
NWMN_0184	hexitol dehydrogenase	362.6	344.2	161.9	302.2	395.2	222.8	201	217.2	146.2	240.1	266.9	117.2	353.4	348.7	209.1	253.5	0.986701	0.591681	0.717317	E		NWMN_1886	phage minor structural protein	0.551394	0.828904	0.520974	SA1764	-	NWMN_1886	phage minor structural protein
NWMN_0185	2-C-methyl-D-erythritol 4-phosphate cytidylyltransferase	9201	12857	4304	8376	10685	4073	6655	6893	3683	9291	9393	3568	11029	9530.5	6774	9342	0.864131	0.614199	0.84704	I		NWMN_0737	hypothetical protein	0.478848	0.914941	0.521752	SA0724	-	NWMN_0737	hypothetical protein
NWMN_0186	zinc-containing alcohol dehydrogenase	9148	12534	4344	7055	10076	4423	7499	6265	3765	8889	8227	3452	10841	8565.5	6882	8558	0.790102	0.634812	0.789411	E		NWMN_1345	hypothetical protein	0.583392	0.309538	0.522607		ebh	ebh1	hypothetical protein
NWMN_0187	tagB protein	6986	8155	2675	4533	6488	2546	4623	4264	2584	6367	5460	2079	7570.5	5510.5	4443.5	5913.5	0.727891	0.586949	0.781124	M		NWMN_1043	hypothetical protein	0.335602	0.308959	0.522617	SA0979	isdD	isdD	hypothetical protein
NWMN_0188	teichoic acid biosynthesis protein F	1245	1470	403.1	1308	1799	562.1	896.3	675.6	294.1	536	858.5	262.5	1357.5	1553.5	785.95	697.25	1.14438	0.578969	0.513628	M		NWMN_2295	respiratory nitrate reductase delta subunit	1.02492	0.460822	0.523312	SA2183	narJ	narJ	respiratory nitrate reductase delta subunit
NWMN_0189	2-C-methyl-D-erythritol 4-phosphate cytidylyltransferase	6877.2	9866.4	3011.8	6616.8	8636.6	3468.2	5137.2	5148.6	2733.4	7157	6392.2	2725.8	8371.8	7626.7	5142.9	6774.6	0.910999	0.614312	0.809217	I		NWMN_1404	hypothetical protein	0.831733	0.55014	0.525339	SA1327	-	NWMN_1404	hypothetical protein
NWMN_0190	alcohol dehydrogenase zinc-containing	18223	24369	8993	15861	20499	12098	12148	12448	8668	18698	17823	9475	21296	18180	12298	18260.5	0.853681	0.577479	0.857461	E		NWMN_0348	5-methyltetrahydropteroyltriglutamate--homocysteine methyltransferase	0.427866	0.495781	0.526343	SA0344	metE	metE	5-methyltetrahydropteroyltriglutamate--homocysteine methyltransferase
NWMN_0191	hypothetical protein	10350	12402	6632	8076	14104	8516	8041	9325	7219	10485	10109	5449	11376	11090	8683	10297	0.974859	0.763274	0.905151	M		NWMN_1915	hypothetical protein	0.719862	0.563617	0.526421		-	NWMN_1915	hypothetical protein
NWMN_0192	glycosyl transferase group 2	18160	19730	11496	11346	20569	14297	14043	13539	11613	15424	14091	7847	18945	15957.5	13791	14757.5	0.842307	0.727949	0.778965	M		NWMN_2137	50S ribosomal protein L6	1.11322	0.517299	0.527651	SA2033	rplF	rplF	50S ribosomal protein L6
NWMN_0193	cell wall biosynthesis protein ScdA	2201	1154	1651	1573	1528	1718	2315	890	1521	1747	1129	1537	1677.5	1550.5	1602.5	1438	0.924292	0.955291	0.857228	D		NWMN_1518	hypothetical protein	0.951757	0.437622	0.529446	SA1445	-	NWMN_1518	hypothetical protein
NWMN_0194	two-component sensor histidine kinase	4250.57	5688.86	2115.57	3125	3798.86	1631.86	3255	2955.57	1882.29	5239	3967	1360.07	4969.71	3461.93	3105.29	4603	0.696605	0.624842	0.92621	T		NWMN_2004	UDP-N-acetylglucosamine 1-carboxyvinyltransferase	0.545609	0.750676	0.529831	SA1902	murA	murA	UDP-N-acetylglucosamine 1-carboxyvinyltransferase
NWMN_0195	two-component response regulator	460.4	889	187.9	316.5	422.2	86.39	388.4	396.3	182.2	624	529.7	105.8	674.7	369.35	392.35	576.85	0.547428	0.581518	0.854973	K		NWMN_2506	acetyl-CoA synthetase	0.599232	0.676962	0.5312	SA2402	acsA2	NWMN_2506	acetyl-CoA synthetase
NWMN_0196	murein hydrolase regulator LrgA	2821.71	1373.14	1772.29	1567.57	1727.29	1807.86	1924.57	592.1	1309.71	1872.71	712.314	1204.71	2097.43	1647.43	1258.34	1292.51	0.785452	0.599942	0.616238	R		NWMN_0144	oligopeptide ABC transporter permease protein	0.613434	0.500521	0.531828	SA0199	oppB	NWMN_0144	oligopeptide ABC transporter permease protein
NWMN_0197	antiholin-like protein LrgB	662.5	365.2	452.8	312.4	522.8	436.4	685	199.8	290.9	409.9	181.5	250.8	513.85	417.6	442.4	295.7	0.812689	0.860952	0.57546	M		NWMN_1635	hypothetical protein	0.65893	0.785244	0.533333	SA1563	pheT2	NWMN_1635	hypothetical protein
NWMN_0198	transcriptional regulator GntR	844.75	1606.85	629.4	762.95	1173.25	519.95	956.5	1005.75	628.2	1345.75	1307.8	485.7	1225.8	968.1	981.125	1326.78	0.78977	0.800396	1.08237	K		NWMN_2559	methionine sulfoxide reductase A	0.636995	0.660603	0.533878	SA2453	msrA	NWMN_2559	methionine sulfoxide reductase A
NWMN_0199	PTS system beta glucosides specific IIAB component	1503	1637	597.1	880.5	1420	395.3	576.2	755.6	248.1	716.5	1041	238.7	1570	1150.25	665.9	878.75	0.732643	0.42414	0.559713	G		NWMN_1967	threonine dehydratase	0.585766	0.316184	0.533987	SA1866	ilvA	ilvA	threonine dehydratase
NWMN_0200	6-phospho-beta-glucosidase	820.9	1322	451.1	635	1078	515.8	898.3	818.4	403.5	618.3	1005	396.1	1071.45	856.5	858.35	811.65	0.799384	0.801111	0.757525	G		NWMN_0587	alpha/beta fold family hydrolase	0.792045	0.860144	0.534138	SA0572	-	NWMN_0587	alpha/beta fold family hydrolase
NWMN_0201	hypothetical protein	210	342.04	114.8	154.8	230.5	90.468	249.18	277.98	90.93	203.38	237.66	82.562	276.02	192.65	263.58	220.52	0.697957	0.954931	0.798928	Q		NWMN_0387	hypothetical protein	1.09757	0.52208	0.53414	SA0381	-	NWMN_0387	hypothetical protein
NWMN_0202	ribokinase	1818.29	2136	1153.14	1253.86	1683.86	1440.71	1558.14	1499.43	1472.14	1973.57	2340.86	1785.71	1977.14	1468.86	1528.79	2157.21	0.742919	0.77323	1.09108	G		NWMN_2350	para-nitrobenzyl esterase chain A	0.516334	0.798398	0.534443	SA2240	pnbA	NWMN_2350	para-nitrobenzyl esterase chain A
NWMN_0203	D-ribose pyranase	3168	3150	636.4	1945	2884	2259	1792	174.8	1560	964.9	2784	2386	3159	2414.5	983.4	1874.45	0.764324	0.311301	0.593368	G		NWMN_2326	dethiobiotin synthase	0.717295	0.547672	0.53459	SA2215	bioD	bioD	dethiobiotin synthase
NWMN_0204	ribose transporter RbsU	1495	1490	769.1	929	1313	1202	1014	1054	965.4	1407	1713	1270	1492.5	1121	1034	1560	0.751089	0.692797	1.04523	G		NWMN_0680	6-pyruvoyl tetrahydropterin synthase (queuosine biosynthesis)	0.529917	0.710282	0.535248	SA0666	queD	NWMN_0680	6-pyruvoyl tetrahydropterin synthase (queuosine biosynthesis)
NWMN_0205	ribose transcriptional repressor RbsR	2434	1221	1514	772.5	1297	1220	1993	1020	1502	912.4	911.1	1106	1827.5	1034.75	1506.5	911.75	0.566211	0.82435	0.498906	K		NWMN_2554	hypothetical protein	0.878154	0.455829	0.535448	SA2448	-	NWMN_2554	hypothetical protein
NWMN_0208	drug transporter	158.5	166.5	84.43	131.5	158.8	91.99	90.1	101.4	98.7	130	144.9	97.95	162.5	145.15	95.75	137.45	0.893231	0.589231	0.845846	G		NWMN_2421	NAD(P)H-flavin oxidoreductase	0.738258	0.413664	0.53622	SA2311	frp	NWMN_2421	NAD(P)H-flavin oxidoreductase
NWMN_0209	choloylglycine hydrolase	1134	1165	522.6	684.5	1131	915.3	513	721.6	495.4	808.8	831.1	486.8	1149.5	907.75	617.3	819.95	0.789691	0.537016	0.71331	M		NWMN_2273	acetyltransferase	0.507303	0.687497	0.536516	SA2161	-	NWMN_2273	acetyltransferase
NWMN_0210	peptidoglycan hydrolase	390.7	590.5	240.3	474.2	932.8	430.8	229.7	297	231.1	334.3	390.1	209.7	490.6	703.5	263.35	362.2	1.43396	0.536792	0.73828	M		NWMN_2594	hypothetical protein	0.508042	0.98817	0.536887	SA2488	-	NWMN_2594	hypothetical protein
NWMN_0211	ABC transporter ATP-binding protein	393	178.143	199.1	167.143	170.514	249.143	393.929	163.786	149.3	400.671	168.214	187.5	285.571	168.829	278.857	284.443	0.591196	0.976488	0.996048	V		NWMN_1461	ATP-dependent RNA helicase DEAD/DEAH box	0.873628	0.269843	0.537538	SA1387	yqfR	NWMN_1461	ATP-dependent RNA helicase DEAD/DEAH box
NWMN_0212	hypothetical protein	673.5	325.7	318.5	337	309	397.7	622.8	242	233.7	336.3	271.8	276.2	499.6	323	432.4	304.05	0.646517	0.865492	0.608587	V		NWMN_2578	ATP phosphoribosyltransferase regulatory subunit HisZ	0.901247	0.378245	0.537578	SA2472	hisZ	hisZ	ATP phosphoribosyltransferase regulatory subunit HisZ
NWMN_0213	hypothetical protein	276.4	111.1	81.63	96.34	91.51	91.24	195.9	52.25	61.61	80.97	81.7	134.6	193.75	93.925	124.075	81.335	0.484774	0.640387	0.419794			NWMN_0922	bifunctional autolysin	1.13373	0.517677	0.538044	SA0905	atl	atl	bifunctional autolysin
NWMN_0215	hypothetical protein	103.2	150.5	57.81	71.67	93.24	44.61	60.63	66.7	49.1	82.3	74.03	32.58	126.85	82.455	63.665	78.165	0.65002	0.501892	0.6162			NWMN_0774	thioredoxin	0.799053	0.631535	0.54044	SA0758	-	NWMN_0774	thioredoxin
NWMN_0216	hypothetical protein	478.4	479.8	235.9	386.5	386.3	194.3	338.5	323.9	189	396.4	409.8	165.2	479.1	386.4	331.2	403.1	0.806512	0.691296	0.841369			NWMN_1661	riboflavin synthase subunit alpha	1.00846	0.70607	0.541242	SA1588	ribB	ribB	riboflavin synthase subunit alpha
NWMN_0217	hypothetical protein	80.31	94.03	18.27	68.95	71.58	42.82	31.88	0.756	38.94	44.58	62.59	35.32	87.17	70.265	16.318	53.585	0.806069	0.187197	0.614718			NWMN_1898	hypothetical protein	0.658707	0.545197	0.541489		-	NWMN_1898	hypothetical protein
NWMN_0218	secretory antigen SsaA-like protein	1071	2371	625.3	1129	1923	469.9	1038	1367	637.5	1288	1294	417	1721	1526	1202.5	1291	0.886694	0.698722	0.750145	R		NWMN_0390	superantigen-like protein	0.500306	0.494249	0.542435	SA0384	ssl3	set3nm	superantigen-like protein
NWMN_0219	hypothetical protein	15814	26653	22495	19256	5490	18510	30370	27227	27464	21597	27767	18664	21233.5	12373	28798.5	24682	0.582711	1.35628	1.16241	S		NWMN_0691	amino acid ABC transporter permease protein	0.593207	0.7748	0.5434	SA0678	opuBB	NWMN_0691	amino acid ABC transporter permease protein
NWMN_0220	hypothetical protein	577.014	1531.14	187.043	501.357	781.914	237.014	687.271	664.129	306.543	545.157	856.157	21266.9	1054.08	641.636	675.7	700.657	0.608717	0.641034	0.664711	S		NWMN_1671	CAAX amino terminal protease	0.636311	0.465871	0.543948	SA1598	-	NWMN_1671	CAAX amino terminal protease
NWMN_0221	hypothetical protein	132.7	209	149.3	67.55	175.9	119.6	120.5	164.3	195.5	180.6	142.8	176.5	170.85	121.725	142.4	161.7	0.712467	0.83348	0.946444			NWMN_0717	hypothetical protein	0.719834	0.59414	0.544209	SA0703	-	NWMN_0717	hypothetical protein
NWMN_0222	hypothetical protein	350.2	845.6	312.9	264.9	543.6	230.7	423.2	514.1	345.2	429.9	672.7	224.7	597.9	404.25	468.65	551.3	0.676116	0.783827	0.922061	S		NWMN_2536	zinc metalloproteinase aureolysin	0.542083	0.848884	0.544315	SA2430	aur	aur	zinc metalloproteinase aureolysin
NWMN_0223	diarrheal toxin	1621	1752	1157	750.6	1567	924.3	1077	1058	1137	1007	1493	988.6	1686.5	1158.8	1067.5	1250	0.687103	0.632968	0.74118	D		NWMN_0870	oligoendopeptidase F	0.670875	0.270376	0.544362	SA0859	pepF	NWMN_0870	oligoendopeptidase F
NWMN_0224	hypothetical protein	762.4	981.3	636.5	412	749.1	812	669.2	671.6	704.7	539.6	920.2	675.4	871.85	580.55	670.4	729.9	0.665883	0.76894	0.837185			NWMN_0330	glyoxalase	0.741589	0.641849	0.544602	SA0326	gloA	NWMN_0330	glyoxalase
NWMN_0225	hypothetical protein	1009	1246	562	595.4	1098	872.1	1028	411.5	717.1	564	1220	780	1127.5	846.7	719.75	892	0.750953	0.638359	0.791131			NWMN_2572	1-(5-phosphoribosyl)-5-[(5-phosphoribosylamino)methylideneamino] imidazole-4-carboxamide isomerase	0.631042	0.392242	0.546425	SA2466	hisA	hisA	1-(5-phosphoribosyl)-5-[(5-phosphoribosylamino)methylideneamino] imidazole-4-carboxamide isomerase
NWMN_0226	hypothetical protein	1013	1288	835.2	591.2	1031	923.8	922.9	931.5	822	718.1	1139	810.1	1150.5	811.1	927.2	928.55	0.704998	0.80591	0.807084			NWMN_2180	formate dehydrogenase accessory protein	1.07044	0.600314	0.546559	SA2075	FdhD	NWMN_2180	formate dehydrogenase accessory protein
NWMN_0227	hypothetical protein	970.2	1022	741.8	535.1	912.4	948.8	956.9	891.3	830.3	808	1128	843.8	996.1	723.75	924.1	968	0.726584	0.927718	0.97179			NWMN_0516	branched-chain amino acid aminotransferase	0.788597	0.443656	0.546784	SA0512	ilvE	ilvE	branched-chain amino acid aminotransferase
NWMN_0228	hypothetical protein	5206	6104	2456	6533	7904	4509	4232	3910	2405	5168	5315	2216	5655	7218.5	4071	5241.5	1.27648	0.719894	0.926879	S		NWMN_0047	M20/M25/M40 family peptidase	0.64296	0.64543	0.547498	SA0098	hipO	NWMN_0047	M20/M25/M40 family peptidase
NWMN_0230	hypothetical protein	281.8	338.6	129.2	233	318.4	171.6	259.6	186.7	144.3	254	210.4	93.9	310.2	275.7	223.15	232.2	0.888781	0.719375	0.748549			NWMN_0740	glycolytic operon regulator	0.928019	0.83633	0.547646	SA0726	gapR	gapR	glycolytic operon regulator
NWMN_0231	hypothetical protein	270	408.2	120.3	306.1	315.7	152.3	226.3	219.9	136	291.5	223.8	63.74	339.1	310.9	223.1	257.65	0.916839	0.657918	0.759805			NWMN_2573	imidazole glycerol phosphate synthase subunit HisH	0.632351	0.527686	0.547861	SA2467	hisH	hisH	imidazole glycerol phosphate synthase subunit HisH
NWMN_0233	hypothetical protein	1185	1675	569.5	622.1	1001	552.4	969.2	967.8	812.6	2354	1143	578.6	1430	811.55	968.5	1748.5	0.567517	0.677273	1.22273			NWMN_0845	ATP-dependent Clp protease ATP-binding subunit ClpB	0.380308	0.740769	0.548769	SA0835	clpB	NWMN_0845	ATP-dependent Clp protease ATP-binding subunit ClpB
NWMN_0234	hypothetical protein	3555	4163	2125	1907	2460	1767	2960	2632	2139	2770	3374	1646	3859	2183.5	2796	3072	0.56582	0.72454	0.796061			NWMN_0859	oligopeptide ABC transporter ATP-binding protein	0.631264	0.445892	0.54894	SA0848	oppF	oppF	oligopeptide ABC transporter ATP-binding protein
NWMN_0236	hypothetical protein	1632	1900	916.7	1089	1284	871.2	1387	1135	947	1367	1411	733.7	1766	1186.5	1261	1389	0.671857	0.714043	0.786523			NWMN_2234	fosfomycin resistance protein FosB	0.650639	0.771661	0.549826	SA2124	fosB	fofB	fosfomycin resistance protein FosB
NWMN_0244	hypothetical protein	1661	1926	932.4	1047	1294	958.3	1264	1078	983.3	1218	1342	689.6	1793.5	1170.5	1171	1280	0.652635	0.652913	0.713688			NWMN_0960	pyruvate dehydrogenase complex E1 component pyruvate dehydrogenase beta subunit	0.889161	0.562112	0.550648	SA0944	pdhB	phdB	pyruvate dehydrogenase complex E1 component pyruvate dehydrogenase beta subunit
NWMN_0245	hypothetical protein	964.8	1277	456.9	590.9	800.2	339.2	1081	793.4	555.1	860.9	910.5	373.9	1120.9	695.55	937.2	885.7	0.620528	0.836114	0.790169			NWMN_0053	hypothetical protein	0.419539	0.815677	0.550863	SA0105	-	NWMN_0053	hypothetical protein
NWMN_0246	hypothetical protein	1180	1500	846.5	796.7	872.8	598.6	2065	1087	997.3	1369	1222	811.8	1340	834.75	1576	1295.5	0.622948	1.17612	0.966791			NWMN_0686	hypothetical protein	0.674985	0.379125	0.551096	SA0673	-	NWMN_0686	hypothetical protein
NWMN_0247	formate/nitrite transporter	2840	1815	3762	2577	2934	3652	2678	1867	3304	3271	2293	2636	2327.5	2755.5	2272.5	2782	1.18389	0.976369	1.19527	P		NWMN_1653	hypothetical protein	1.2249	0.514603	0.551283	SA1581	-	NWMN_1653	hypothetical protein
NWMN_0248	branched-chain amino acid transport system II carrier protein	2490	2744	1852	1778	3037	2397	1753	1916	1765	2238	2632	1728	2617	2407.5	1834.5	2435	0.919947	0.700994	0.930455	E		NWMN_1710	lantibiotic ABC transporter protein	0.692223	0.805474	0.551944		epiE	bsaE	lantibiotic ABC transporter protein
NWMN_0249	5'-nucleotidase	4666	7146	1359	3860	4123	426.6	7012	3203	1054	5486	5304	373	5906	3991.5	5107.5	5395	0.675838	0.864799	0.913478	R		NWMN_0341	hypothetical protein	1.15097	0.448501	0.552078	SA0336	-	NWMN_0341	hypothetical protein
NWMN_0250	ABC transporter permease protein	8996	5101	5842	4303	4054	9447	10844	3933	5139	5854	3151	6015	7048.5	4178.5	7388.5	4502.5	0.592821	1.04824	0.638788	V		NWMN_2336	hypothetical protein	0.681935	0.706459	0.55265	SA2225	-	NWMN_2336	hypothetical protein
NWMN_0251	ABC transporter ATP-binding protein	7545.5	5517.5	6063.5	4360.5	4071	8827	10581.5	3986.5	4384	6020	2951.5	5203.5	6531.5	4215.75	7284	4485.75	0.645449	1.11521	0.686787	V		NWMN_1337	dihydrofolate reductase	0.590546	0.661549	0.553324	SA1259	dfrA	dfrA	dihydrofolate reductase
NWMN_0252	perfringolysin O regulator protein	19031	28642	7112	18415	21786	7421	10535	13668	4848	14218	19245	3856	23836.5	20100.5	12101.5	16731.5	0.843266	0.507688	0.701928	G		NWMN_0777	hypothetical protein	0.734701	0.559033	0.553626	SA0761	truncated-SA	NWMN_0777	hypothetical protein
NWMN_0253	PfkB family carbohydrate kinase	1176.17	823.233	488.433	1138.43	1027.33	1063.47	582.667	396.5	362.833	572.867	651.067	445.533	999.7	1082.88	489.583	611.967	1.08321	0.48973	0.61215	G		NWMN_1636	hypothetical protein	0.657772	0.767762	0.554453	SA1564	-	NWMN_1636	hypothetical protein
NWMN_0254	hypothetical protein	1787	1256	702.2	1720	1484	1582	916	505.3	589.8	1182	918	709.9	1521.5	1602	710.65	1050	1.05291	0.467072	0.690108	Q		NWMN_0789	FeS assembly protein SufB	0.597794	0.571615	0.554607	SA0778	sufB	sufB	FeS assembly protein SufB
NWMN_0255	pyrimidine nucleoside transporter	489.1	355.4	321.2	413.9	461	438.9	454	191.5	248.3	412.6	284.7	242	422.25	437.45	322.75	348.65	1.036	0.764358	0.825696	F		NWMN_2389	hypothetical protein	0.690525	0.568813	0.554831	SA2280	-	NWMN_2389	hypothetical protein
NWMN_0256	sodium:solute symporter	1663	1083	621.8	1300	1145	726.4	1139	719.9	549.1	1225	1175	645.8	1373	1222.5	929.45	1200	0.890386	0.676948	0.873999	E		NWMN_1597	DNA polymerase III alpha subunit super	0.611457	0.506233	0.555557	SA1525	dnaE	dnaE	DNA polymerase III alpha subunit super
NWMN_0257	N-acetylneuraminate lyase	2227.86	1736.86	848.443	2176.43	2011.29	885.514	1568.14	1180.14	851.457	2064.57	1744.29	787.357	1982.36	2093.86	1374.14	1904.43	1.05625	0.693186	0.960689	E		NWMN_0001	chromosomal replication initiation protein	0.659186	0.429343	0.555708	SA0001	dnaA	dnaA	chromosomal replication initiation protein
NWMN_0258	ROK	6494	7668	2955	5503	8436	4022	3393	4413	2557	4562	5921	2105	7081	6969.5	3903	5241.5	0.984254	0.551193	0.74022	K		NWMN_0780	ABC transporter ATP-binding protein	0.784369	0.594096	0.555871	SA0769	metN2	NWMN_0780	ABC transporter ATP-binding protein
NWMN_0259	hypothetical protein	3177	3924	1221	2616	3525	1821	1958	2077	1219	2736	2586	879.3	3550.5	3070.5	2017.5	2661	0.864808	0.56823	0.749472	K		NWMN_2026	aldehyde dehydrogenase	0.573211	1.0397	0.556185	SA1924	aldA	NWMN_2026	aldehyde dehydrogenase
NWMN_0260	N-acetylmannosamine-6-phosphate 2-epimerase	5905	7087	3183	4309	6968	4164	3659	4606	3228	4837	5800	2695	6496	5638.5	4132.5	5318.5	0.867996	0.636161	0.818735	G		NWMN_0061	ornithine cyclodeaminase	0.468564	0.698898	0.556508	SA0113	sbnB	sbnB	ornithine cyclodeaminase
NWMN_0261	hypothetical protein	1395	1436	728.3	1956	2121	1462	899.7	667.2	629.8	1160	894.9	458.4	1415.5	2038.5	783.45	1027.45	1.44013	0.553479	0.725857	S		NWMN_0199	PTS system beta glucosides specific IIAB component	0.732643	0.42414	0.559713	SA0255	ptbA	NWMN_0199	PTS system beta glucosides specific IIAB component
NWMN_0262	lipase	5097.43	5418.86	2330.57	3098	4972.43	3243.57	2796.57	3430	2368.71	3474.29	4489.57	2894.71	5258.14	4035.21	3113.29	3981.93	0.767422	0.592088	0.757288	R		NWMN_0513	chaperone protein HchA	0.527856	1.29232	0.55993	SA0509	hchA	NWMN_0513	chaperone protein HchA
NWMN_0263	integrase	2067	1506	1261	1339	1134	1228	1160	1436	1247	1638	1765	1433	1786.5	1236.5	1298	1701.5	0.692135	0.72656	0.952421	L		NWMN_0114	cation efflux	0.582156	0.955118	0.56028	SA0163	-	NWMN_0114	cation efflux
NWMN_0265	hypothetical protein	4697	9987	2532	4678	5286	1453	4003	4268	1892	6618	5136	1110	7342	4982	4135.5	5877	0.678562	0.563266	0.800463			NWMN_0039	hypothetical protein	0.748063	0.36844	0.561201	SA0089	-	NWMN_0039	hypothetical protein
NWMN_0266	hypothetical protein	3781	7352	1909	3566	4337	970.6	3452	3192	1340	4654	3908	853.3	5566.5	3951.5	3322	4281	0.709872	0.596784	0.769065	K		NWMN_0537	hypothetical protein	1.56884	0.825589	0.562925	SA0532	-	NWMN_0537	hypothetical protein
NWMN_0267	hypothetical protein	915.4	1188	529	770.9	867	515.9	1136	842.5	545.1	1047	963.2	375	1051.7	818.95	989.25	1005.1	0.778692	0.94062	0.955691			NWMN_1997	phosphomethylpyrimidine kinase	0.822294	0.358285	0.563673	SA1896	thiD	thiD	phosphomethylpyrimidine kinase
NWMN_0268	anti repressor	157.6	240	52.86	166	254.2	144.3	83.13	106.2	107.9	91.52	106.6	46.45	198.8	210.1	94.665	99.06	1.05684	0.476182	0.49829	K		NWMN_0547	amino acid permease	0.691627	0.924254	0.563972	SA0541	-	NWMN_0547	amino acid permease
NWMN_0285	hypothetical protein	1217	1099	293.4	819	1025	871.6	1110	85.7	520	0.01	730.2	549.9	1158	922	597.85	365.105	0.7962	0.516278	0.315289			NWMN_2203	secretory antigen SsaA	1.77309	0.379258	0.564174	SA2097	ssaA	NWMN_2203	secretory antigen SsaA
NWMN_0286	hypothetical protein	1254	940.1	665	640.4	872.6	999.4	1015	562.4	638.8	885.8	678.4	619.4	1097.05	756.5	788.7	782.1	0.689577	0.718928	0.712912			NWMN_0147	gamma-glutamyltranspeptidase	0.577719	0.68598	0.567195	SA0202	ggt	NWMN_0147	gamma-glutamyltranspeptidase
NWMN_0287	hypothetical protein	1122	736.3	681.7	724.5	857.9	877.7	1235	639.7	596	858.1	754.4	578.3	929.15	791.2	937.35	806.25	0.851531	1.00883	0.867729			NWMN_2419	acetyltransferase GNAT	0.867182	1.0988	0.569524	SA2309	-	NWMN_2419	acetyltransferase GNAT
NWMN_0288	hypothetical protein	277.2	168.6	87.11	132.1	183.3	212	160.3	69.04	133.6	0.01	124	114	222.9	157.7	114.67	62.005	0.707492	0.514446	0.278174			NWMN_0842	HAD superfamily hydrolase	0.912277	0.525498	0.569577	SA0832	yitU	NWMN_0842	HAD superfamily hydrolase
NWMN_0289	hypothetical protein	445.9	266	248.2	251.3	311	402	390	223.6	229.2	270.4	226.1	285.1	355.95	281.15	306.8	248.25	0.789858	0.861919	0.697429	R		NWMN_2420	bleomycin resistance protein	0.904863	0.611746	0.570104	SA2310	-	NWMN_2420	bleomycin resistance protein
NWMN_0290	hypothetical protein	280	125.5	130.2	150.2	199.2	256.8	217.5	118.2	140.2	169.7	152.2	158.3	202.75	174.7	167.85	160.95	0.861652	0.827867	0.793835			NWMN_2078	ABC transporter periplasmic binding protein	0.471108	0.59821	0.570174	SA1979	htsA	NWMN_2078	ABC transporter periplasmic binding protein
NWMN_0291	hypothetical protein	84.28	85.68	48.89	72.79	119.1	76	66.77	67	57.48	295	62.33	49.24	84.98	95.945	66.885	178.665	1.12903	0.787068	2.10244			NWMN_0592	integrase/recombinase	0.485452	1.05466	0.570804	SA0577	-	NWMN_0592	integrase/recombinase
NWMN_0292	hypothetical protein	13.11	12.93	8.1	22.02	16.58	29.76	19.5	16.96	31.99	171.5	8.34	21.61	13.02	19.3	18.23	89.92	1.48233	1.40015	6.9063			NWMN_2407	hypothetical protein	0.829616	0.670119	0.57122	SA2299	-	NWMN_2407	hypothetical protein
NWMN_0293	hypothetical protein	338.1	235.7	142.3	372.9	573.2	463.7	269.9	224	224.8	261.3	156.4	154.8	286.9	473.05	246.95	208.85	1.64883	0.860753	0.727954			NWMN_0903	ABC transporter ATP-binding protein	0.710421	0.407113	0.571291	SA0888	-	NWMN_0903	ABC transporter ATP-binding protein
NWMN_0294	hypothetical protein	213.5	143	43.67	204.8	269.3	234.8	167.6	74.84	92.49	20.95	94.38	94.94	178.25	237.05	121.22	57.665	1.32987	0.680056	0.323506			NWMN_0099	capsular polysaccharide biosynthesis protein CapE	1.17548	0.598321	0.572097	SA0148	capE	capE	capsular polysaccharide biosynthesis protein CapE
NWMN_0295	hypothetical protein	190.9	142	90.15	229.2	303	234.9	156.2	117.1	106.6	109.6	135.3	106.3	166.45	266.1	136.65	122.45	1.59868	0.820967	0.735656			NWMN_1328	DNA-binding response regulator ArlR	0.449891	0.88726	0.572708	SA1247	truncated-arlR	NWMN_1328	DNA-binding response regulator ArlR
NWMN_0296	hypothetical protein	284.1	198.1	102.2	286.5	418	346.4	216.4	191.3	186.3	182.4	175.4	142.4	241.1	352.25	203.85	178.9	1.46101	0.8455	0.742016			NWMN_0344	hypothetical protein	0.870221	0.535531	0.572785	SA0340	-	NWMN_0344	hypothetical protein
NWMN_0297	hypothetical protein	190.9	119.5	98.23	196.2	267.8	209.3	185.5	390.2	96.54	130.9	122.7	103.9	155.2	232	287.85	126.8	1.49485	1.8547	0.81701			NWMN_2294	respiratory nitrate reductase gamma subunit	1.07977	0.4929	0.573	SA2182	narI	narI	respiratory nitrate reductase gamma subunit
NWMN_0298	hypothetical protein	36.13	12.64	9.727	33.95	76.56	47.75	17.68	186	20.77	12.89	22.18	14.53	24.385	55.255	101.84	17.535	2.26594	4.17634	0.71909			NWMN_2330	hypothetical protein	0.479963	0.97315	0.57307	SA2219	gtrA	NWMN_2330	hypothetical protein
NWMN_0299	hypothetical protein	80.35	50.59	39.09	103	138.8	119.8	66.36	57.25	48.14	46.64	65.24	49.57	65.47	120.9	61.805	55.94	1.84665	0.94402	0.854437			NWMN_2044	hypothetical protein	0.571429	0.812876	0.574122	SA1942	-	NWMN_2044	hypothetical protein
NWMN_0300	hypothetical protein	427.3	266.3	160	242.8	311.4	255.8	221.9	184.9	171.3	202.8	232.2	162	346.8	277.1	203.4	217.5	0.79902	0.586505	0.627163	J		NWMN_0525	Ser-Asp rich fibrinogen/bone sialoprotein-binding protein SdrE	0.666602	0.585698	0.574617	SA0521	sdrE	sdrE	Ser-Asp rich fibrinogen/bone sialoprotein-binding protein SdrE
NWMN_0301	hypothetical protein	108.4	96.48	50.32	84.87	126.7	121.7	70.97	87.33	47.83	71.84	70.42	50.86	102.44	105.785	79.15	71.13	1.03265	0.772647	0.694358			NWMN_2079	hypothetical protein	0.348411	0.964023	0.574806	SA1980	-	NWMN_2079	hypothetical protein
NWMN_0302	hypothetical protein	500.75	350.6	238.5	354.25	409.7	460.9	341.75	264.95	211.25	318.95	312.05	263.25	425.675	381.975	303.35	315.5	0.89734	0.712633	0.741176	S		NWMN_0197	antiholin-like protein LrgB	0.812689	0.860952	0.57546	SA0253	lrgB	lrgB	antiholin-like protein LrgB
NWMN_0303	hypothetical protein	147.4	108.6	52.12	92.74	116.3	179.5	97.57	71.36	59.37	108.7	94.64	88.68	128	104.52	84.465	101.67	0.816562	0.659883	0.794297			NWMN_2323	8-amino-7-oxononanoate synthase	0.643047	0.684774	0.576208	SA2212	bioF	bioF	8-amino-7-oxononanoate synthase
NWMN_0304	phage minor structural protein	154.5	101.6	65.02	115.1	135.6	140.8	99.86	80.54	91.7	123.9	106.4	88.58	128.05	125.35	90.2	115.15	0.978914	0.704412	0.899258	E		NWMN_1159	hypothetical protein	0.770389	0.479916	0.576959	SA1092	smf	NWMN_1159	hypothetical protein
NWMN_0306	phiETA ORF57-like protein	7128	1424	2421	1552	1750	1087	1139	501.2	370.6	776.6	528.8	355.4	4276	1651	820.1	652.7	0.386109	0.191791	0.152643			NWMN_0083	phosphopentomutase	0.69063	0.33596	0.577112	SA0134	drm	NWMN_0083	phosphopentomutase
NWMN_0314	hypothetical protein	1764	1819	808.9	1358	1696	1033	1546	1232	624.5	1734	1179	553.4	1791.5	1527	1389	1456.5	0.852358	0.775328	0.813006	I		NWMN_0423	sodium-dependent symporter protein	0.647722	0.600162	0.578022	SA0417	-	NWMN_0423	sodium-dependent symporter protein
NWMN_0315	NADH-dependent flavin oxidoreductase Oye	2078	2305	898.5	1748	2065	1163	1385	1488	768.1	1489	1587	651.1	2191.5	1906.5	1436.5	1538	0.869952	0.655487	0.701802	C		NWMN_0004	DNA gyrase B subunit	0.74553	0.528712	0.579098	SA0005	gyrB	gyrB	DNA gyrase B subunit
NWMN_0316	hypothetical protein	1386.57	1190.51	682.171	996.8	1157.73	1030.3	1227.39	724.157	677.643	1274	1010.5	824.443	1288.54	1077.26	975.771	1142.25	0.836033	0.757267	0.886466	C		NWMN_1964	3-isopropylmalate dehydrogenase	0.522246	0.466292	0.580644	SA1863	leuB	leuB	3-isopropylmalate dehydrogenase
NWMN_0317	glycine cleavage system protein H	1745	1631	872	1197	1389	1240	1619	1027	964.2	1714	1348	1235	1688	1293	1323	1531	0.765995	0.783768	0.906991	E		NWMN_0549	hypothetical protein	0.558508	0.685641	0.581058	SA0543	-	NWMN_0549	hypothetical protein
NWMN_0318	hypothetical protein	1414.43	1044.29	736.071	995.571	1132.43	878.729	1193.14	815.343	646.429	1261.57	1057.86	858.443	1229.36	1064	1004.24	1159.71	0.865493	0.816885	0.94335	R		NWMN_2406	hypothetical protein	0.663213	0.890564	0.581195	SA2298	-	NWMN_2406	hypothetical protein
NWMN_0319	hypothetical protein	1042.23	1055.29	541	732.229	828.686	578.157	803.514	641.171	472.243	1032.84	800.529	574.671	1048.76	780.457	722.343	916.686	0.744173	0.688761	0.874069	K		NWMN_0383	hypothetical protein	0.518164	0.722055	0.58295	SA0378	-	NWMN_0383	hypothetical protein
NWMN_0320	lipoate-protein ligase A	907	827.4	347.8	616.5	657	389.1	572.9	467.8	354.9	892.6	601	420.5	867.2	636.75	520.35	746.8	0.73426	0.600035	0.861162	H		NWMN_0663	hypothetical protein	0.779618	0.71278	0.583456	SA0649	-	NWMN_0663	hypothetical protein
NWMN_0321	oxidoreductase	12496	5590	2291	4743	5422	8738	14137	2302	6816	2697	4131	6960	9043	5082.5	8219.5	3414	0.562037	0.908935	0.37753	M		NWMN_0333	hypothetical protein	0.780549	0.706871	0.583803	SA0329	yeiH	NWMN_0333	hypothetical protein
NWMN_0322	ascorbate-specific PTS system enzyme IIC	761.2	611.1	376.5	422.6	742.1	644.3	546.9	420.3	422	589.5	533.1	423.1	686.15	582.35	483.6	561.3	0.848721	0.704802	0.818043	S		NWMN_0847	2-isopropylmalate synthase	0.673924	0.582685	0.5845	SA0837	leuA2	NWMN_0847	2-isopropylmalate synthase
NWMN_0323	hypothetical protein	1537	1085	722.6	1018	1344	993.8	1009	781.9	638.7	935.1	1060	729.3	1311	1181	895.45	997.55	0.900839	0.683028	0.760908	G		NWMN_0030	hypothetical protein	0.726663	0.758279	0.585379	SA0085	dus	NWMN_0030	hypothetical protein
NWMN_0324	PTS system IIA component	1004.61	690.871	424.914	656.343	868.2	679.8	563.1	425.414	384.629	581.729	670.143	438.014	847.743	762.271	494.257	625.936	0.899178	0.583027	0.738356	G		NWMN_0765	hypothetical protein	0.475964	0.689317	0.587392	SAS018	-	NWMN_0765	hypothetical protein
NWMN_0325	BglG family transcriptional antiterminator	612.9	503.7	267	514.9	611.7	549.9	330.3	335.6	258.1	456.3	410.8	288.2	558.3	563.3	332.95	433.55	1.00896	0.596364	0.776554	G		NWMN_0409	staphylococcal tandem lipoprotein	0.735718	0.583348	0.587862	SA0399	lpl13	lpl6nm	staphylococcal tandem lipoprotein
NWMN_0326	MarR family regulatory protein	315	299.1	169.1	326.6	175	114.3	328.8	180.5	146.3	381.7	245.5	138.3	307.05	250.8	254.65	313.6	0.816805	0.829344	1.02133	K		NWMN_1922	exonuclease	0.629518	0.593372	0.588771	SA1806	-	NWMN_1922	exonuclease
NWMN_0327	MATE efflux	111.667	115.767	79.62	95.8	132.833	85.2333	129.533	55.6733	82.84	118.1	119.9	96.58	113.717	114.317	92.6033	119	1.00528	0.814334	1.04646	V		NWMN_0470	hypothetical protein	0.716488	0.575362	0.589679	SA0466	-	NWMN_0470	hypothetical protein
NWMN_0328	hypothetical protein	322.1	323	154.2	304.1	256.2	154.5	279.2	299	161.8	329.7	240.9	118.7	322.55	280.15	289.1	285.3	0.868548	0.896295	0.884514	S		NWMN_0401	hypothetical protein	0.529732	0.98768	0.589986	SA0394	-	NWMN_0401	hypothetical protein
NWMN_0329	glycerol-3-phosphate transporter	229.8	210.4	104.4	161.8	257.6	263.8	203.3	144.2	152.8	198.2	179.6	163.8	220.1	209.7	173.75	188.9	0.952749	0.789414	0.858246	G		NWMN_2596	N-acetyltransferase	0.761692	0.530112	0.590982	SA2490	-	NWMN_2596	N-acetyltransferase
NWMN_0330	glyoxalase	15950	12524	8709	8218	12898	17082	10118	8158	6835	7534	7973	8389	14237	10558	9138	7753.5	0.741589	0.641849	0.544602	E		NWMN_2392	surface protein G	0.750803	0.570216	0.592015		-	NWMN_2392	surface protein G
NWMN_0331	luciferase-like monooxygenase	8523	8351	5501	5939	7582	9419	6145	5838	5424	5166	5188	5909	8437	6760.5	5991.5	5177	0.801292	0.710146	0.613607	C		NWMN_0644	hypothetical protein	0.810682	0.617584	0.592112	SA0630	-	NWMN_0644	hypothetical protein
NWMN_0332	NADPH-dependent FMN reductase	1393.14	1484.71	1051.69	1059	1315.43	1466.71	1381.14	1105.77	866.2	915.857	879.886	963.229	1438.93	1187.21	1243.46	897.871	0.825068	0.864155	0.623986	R		NWMN_0375	hypothetical protein	0.515377	0.708412	0.592361	SA0370	-	NWMN_0375	hypothetical protein
NWMN_0333	hypothetical protein	493.786	717.029	254.014	398.086	547.014	144	655.143	200.747	242.529	179.549	527.329	119.169	605.407	472.55	427.945	353.439	0.780549	0.706871	0.583803	S		NWMN_0630	ABC transporter ATP-binding protein	0.973659	0.519514	0.592635	SA0616	vraF	vraF	ABC transporter ATP-binding protein
NWMN_0334	hypothetical protein	545.3	892.5	420.6	457.3	681.8	421.9	496.7	550	360.2	537.4	507.2	357.3	718.9	569.55	523.35	522.3	0.792252	0.727987	0.726527			NWMN_2556	hypothetical protein	0.709636	0.748693	0.592739	SA2450	-	NWMN_2556	hypothetical protein
NWMN_0335	hypothetical protein	11323	16132	6371	9560	12532	9062	6521	7918	4713	10232	10163	3361	13727.5	11046	7219.5	10197.5	0.804662	0.525915	0.742852	J		NWMN_0136	PTS system sucrose specific IIBC component	0.378243	0.360211	0.593344	SA0186	murP	NWMN_0136	PTS system sucrose specific IIBC component
NWMN_0336	lipoprotein	1708	3077	1272	1249	2163	1087	1082	1451	812.9	1514	1624	562.5	2392.5	1706	1266.5	1569	0.713062	0.529363	0.655799	P		NWMN_0203	D-ribose pyranase	0.764324	0.311301	0.593368	SA0259	rbsD	rbsD	D-ribose pyranase
NWMN_0337	Dyp-type peroxidase	1834	2463	1599	1138	2329	1389	1267	1649	1007	1599	1836	883.4	2148.5	1733.5	1458	1717.5	0.806842	0.678613	0.799395	P		NWMN_0087	hypothetical protein	0.532951	0.598853	0.593792	SA0139	-	NWMN_0087	hypothetical protein
NWMN_0338	hypothetical protein	659.9	893	523.4	308	607.2	541.7	474	545.4	456.4	810.5	640.2	343.1	776.45	457.6	509.7	725.35	0.589349	0.656449	0.934188	P		NWMN_1999	transglycosylase SceD protein	4.38967	0.487842	0.594529	SA1898	sceD	NWMN_1999	transglycosylase SceD protein
NWMN_0339	Sec-independent protein translocase TatC	3953	5589	2316	2114	3754	2340	2017	3124	2242	3344	4594	2128	4771	2934	2570.5	3969	0.614965	0.538776	0.831901	U		NWMN_1511	transcription elongation factor	0.812011	0.577758	0.594581	SA1438	greA	greA	transcription elongation factor
NWMN_0340	mttA/Hcf106 -related protein	3498	4567	1373	2116	3941	1660	1908	2337	1373	2606	3253	1288	4032.5	3028.5	2122.5	2929.5	0.751023	0.526348	0.726472	U		NWMN_2353	ABC transporter ATP-binding protein	0.448465	0.942369	0.594682	SA2243	-	NWMN_2353	ABC transporter ATP-binding protein
NWMN_0341	hypothetical protein	1474	2328	617.5	1493	2883	1190	691.2	1014	489	1059	1040	348.1	1901	2188	852.6	1049.5	1.15097	0.448501	0.552078	R		NWMN_0567	hypothetical protein	0.589693	0.469259	0.594752		-	NWMN_0567	hypothetical protein
NWMN_0342	hypothetical protein	816.1	1495	587.4	798.2	1108	726.8	960.5	1049	590.4	1283	1178	597.1	1155.55	953.1	1004.75	1230.5	0.824802	0.869499	1.06486			NWMN_1253	hypothetical protein	0.720257	0.50711	0.595162	SA1176	-	NWMN_1253	hypothetical protein
NWMN_0343	ABC transporter ATP-binding protein	1223	1402	761.7	832	1268	792.1	1523	1066	826	1430	1332	743.2	1312.5	1050	1294.5	1381	0.8	0.986286	1.05219	V		NWMN_2568	intercellular adhesion protein C	0.629303	0.470251	0.595198	SA2462	icaC	icaC	intercellular adhesion protein C
NWMN_0344	hypothetical protein	1177	1674	563.3	1004	1477	818.7	1411	115.8	951.4	0.01	1633	942.8	1425.5	1240.5	763.4	816.505	0.870221	0.535531	0.572785			NWMN_0376	hypothetical protein	0.508757	0.602401	0.595909	SA0371	-	NWMN_0376	hypothetical protein
NWMN_0345	hypothetical protein	704.2	673.8	253.7	675.9	660	321.8	612.7	427.8	287.1	600.5	471.2	170.7	689	667.95	520.25	535.85	0.969448	0.75508	0.777721	S		NWMN_0848	Sua5/YciO/YrdC/YwlC	0.665094	0.733409	0.596449	SA0838	-	NWMN_0848	Sua5/YciO/YrdC/YwlC
NWMN_0346	acetyl-CoA acetyltransferase	4216	4302.5	2236.5	5002	4624	2954.5	4213.5	2962.5	2048.5	5892.5	4451	2562.5	4259.25	4813	3588	5171.75	1.13001	0.842402	1.21424	I		NWMN_1239	aspartate kinase (lysC1/ThrA)	0.700865	0.544223	0.596527	SA1163	thrA	thrA	aspartate kinase (lysC1/ThrA)
NWMN_0347	hypothetical protein	2672.5	3390.5	2385.5	1182	1920	1248	2070	1874.5	1827.5	1860.5	2260.5	1390	3031.5	1551	1972.25	2060.5	0.511628	0.650586	0.679697	R		NWMN_2059	PTS system mannitol-specific IIA component	0.732847	0.830778	0.597121	SA1962	mtlA	mtlA	PTS system mannitol-specific IIA component
NWMN_0348	5-methyltetrahydropteroyltriglutamate--homocysteine methyltransferase	4276	5442	3836	1468	2690	1947	2948	1870	2696	1387	3728	2241	4859	2079	2409	2557.5	0.427866	0.495781	0.526343	E		NWMN_0849	hypothetical protein	0.722867	0.535167	0.597729	SA0839	-	NWMN_0849	hypothetical protein
NWMN_0349	bifunctional homocysteine S-methyltransferase/5,10-methylenetetrahydrofolate reductase protein	1659.43	1774.57	1214.86	322.143	661.329	620.871	955.343	916.186	930.143	638.243	1045	755.657	1717	491.736	935.764	841.621	0.286392	0.545	0.49017	E		NWMN_0361	integrase-like protein	0.699547	0.55793	0.598075		-	NWMN_0361	integrase-like protein
NWMN_0350	trans-sulfuration enzyme	1351	1657	1044	305.4	598.9	483.1	600.4	796.9	793.3	540.9	943.9	607.2	1504	452.15	698.65	742.4	0.300632	0.464528	0.493617	E		NWMN_1136	DAK2 domain-containing protein	0.918945	0.735069	0.598211	SA1069	vfrB	NWMN_1136	DAK2 domain-containing protein
NWMN_0351	Cys/Met metabolism PLP-dependent enzyme	2207	3287	2443	602.8	1051	1264	1287	1784	1677	1408	2020	1334	2747	826.9	1535.5	1714	0.301019	0.558973	0.623953	E		NWMN_1286	methicillin resistance factor FemA	0.58389	0.868249	0.598292	SA1206	femA	femA	methicillin resistance factor FemA
NWMN_0352	hypothetical protein	595.9	350.7	95	159.8	360.7	208.2	165.7	141.1	117.4	202.7	146.3	97.24	473.3	260.25	153.4	174.5	0.549863	0.324107	0.368688			NWMN_1617	D-3-phosphoglycerate dehydrogenase	0.772755	0.592757	0.598909	SA1545	serA	serA	D-3-phosphoglycerate dehydrogenase
NWMN_0353	ParB family chromosome partioning protein	59518	18823	6203	13734	18422	6318	3727	1877	1059	6407	2526	884.7	39170.5	16078	2802	4466.5	0.410462	0.0715334	0.114027	K		NWMN_1327	two-component sensor histidine kinase	0.444466	0.956376	0.598965	SA1246	arlS	NWMN_1327	two-component sensor histidine kinase
NWMN_0354	hypothetical protein	4620	6266	2721	4623	5166	2689	4175	3409	2176	5649	5151	2084	5443	4894.5	3792	5400	0.899228	0.696675	0.9921	M		NWMN_2548	preprotein translocase subunit SecA	0.735372	0.870739	0.599122	SA2442	azi	NWMN_2548	preprotein translocase subunit SecA
NWMN_0355	translation-associated GTPase	3501.67	4055	2199.67	3142	3690.67	2526.67	3547.67	2557	1972	4647.67	3723.33	1918	3778.33	3416.33	3052.33	4185.5	0.904191	0.807852	1.10776	J		NWMN_1295	oligoendopeptidase F	0.655671	0.538897	0.599208	SA1216	pepF	pepF	oligoendopeptidase F
NWMN_0356	hypothetical protein	611.3	521.6	395.5	525	712.7	562.6	713.1	497.6	439.8	680.5	613.2	385.5	566.45	618.85	605.35	646.85	1.09251	1.06867	1.14194			NWMN_0692	histidinol-phosphate aminotransferase HisC1	0.774325	0.593026	0.600376	SA0679	hisC	hisC	histidinol-phosphate aminotransferase HisC1
NWMN_0357	30S ribosomal protein S6	11379	6716	5163	10922	11667	9759	7655	7793	6034	11046	10273	8099	9047.5	11294.5	7724	10659.5	1.24836	0.853716	1.17817	J		NWMN_0448	DNA polymerase III delta prime subunit	0.782099	0.581389	0.600595	SA0442	holB	holB	DNA polymerase III delta prime subunit
NWMN_0358	bacteriophage L54a single-stranded DNA binding protein	12900	6874	5091	10555	11599	9722	7413	8249	6470	11726	10502	8185	9887	11077	7831	11114	1.12036	0.79205	1.1241	L		NWMN_0912	hypothetical protein	0.788498	0.323347	0.600905	SA0895	menF	NWMN_0912	hypothetical protein
NWMN_0359	30S ribosomal protein S18	577.05	435.1	282.145	492.15	597.1	478.05	504.75	399.25	326.34	568.65	500.15	368.545	506.075	544.625	452	534.4	1.07617	0.893148	1.05597	J		NWMN_1045	iron compound ABC transporter permease protein	0.393572	0.522007	0.601032	SA0981	isdF	isdF	iron compound ABC transporter permease protein
NWMN_0360	hypothetical protein	322.4	356.5	146.1	262.6	228.9	89.72	272.3	191.4	112.7	287	202.7	74.96	339.45	245.75	231.85	244.85	0.723965	0.683017	0.721314			NWMN_1525	luciferase	1.05871	0.564823	0.601791	SA1451	-	NWMN_1525	luciferase
NWMN_0361	integrase-like protein	717.56	680.86	257.92	395.82	582.44	245.5	394.56	385.66	208.02	433.3	403.06	135.08	699.21	489.13	390.11	418.18	0.699547	0.55793	0.598075	L		NWMN_0863	oligopeptide ABC transporter ATP-binding protein	0.743971	0.624491	0.602098	SA0852	appF	NWMN_0863	oligopeptide ABC transporter ATP-binding protein
NWMN_0362	exotoxin 2	2018	2274.5	1222.5	772.5	955.3	555.35	2257	1404	1280.5	2916.5	2788	1848	2146.25	863.9	1830.5	2852.25	0.402516	0.852883	1.32895			NWMN_0923	acetyltransferase GNAT	1.01939	0.512926	0.602287	SA0906	-	NWMN_0923	acetyltransferase GNAT
NWMN_0363	hypothetical protein	266.2	248.3	127.8	196.6	246.7	140.9	302	188.1	114.4	226.7	203.4	106.5	257.25	221.65	245.05	215.05	0.861613	0.952575	0.835957	S		NWMN_0673	glycosyl transferase group 2	0.496147	0.991236	0.602871	SA0659	csbB	NWMN_0673	glycosyl transferase group 2
NWMN_0364	hypothetical protein	15996	23490	32768	22354	15525	13081	58914	32351	30360	29697	29344	28738	19743	18939.5	45632.5	29520.5	0.959302	2.31133	1.49524	S		NWMN_0150	M23/M37 peptidase domain-containing protein	1.07304	0.484893	0.603207	SA0205	-	NWMN_0150	M23/M37 peptidase domain-containing protein
NWMN_0365	hypothetical protein	1041	877	750.1	640.1	1119	770.4	1094	1027	990.6	736.1	711.2	336	959	879.55	1060.5	723.65	0.917153	1.10584	0.754588	K		NWMN_2310	fmhA protein	0.546829	0.481415	0.603334	SA2199	fmhA	fmhA	fmhA protein
NWMN_0366	hypothetical protein	710.1	610.8	1005	917.2	835	508.9	1507	1203	945.1	1073	938.8	727.9	660.45	876.1	1355	1005.9	1.32652	2.05163	1.52305	S		NWMN_2257	teicoplanin resistance associated protein A	0.717438	1.0068	0.603535	SA2146	tcaA	tcaA	teicoplanin resistance associated protein A
NWMN_0367	phosphoglycerate mutase	893.4	1601	446.9	1052	1040	278.1	740.1	843.6	442.4	1139	994.2	306.1	1247.2	1046	791.85	1066.6	0.838679	0.634902	0.855196	G		NWMN_1912	hypothetical protein	0.605479	0.611636	0.603952		-	NWMN_1912	hypothetical protein
NWMN_0368	hypothetical protein	1065	1452	785.8	1116	1174	810.5	970.8	816.8	805.8	1353	1197	692.6	1258.5	1145	893.8	1275	0.909813	0.710211	1.01311			NWMN_2223	hypothetical protein	1.11278	0.820011	0.60397	SA2113	-	NWMN_2223	hypothetical protein
NWMN_0369	hypothetical protein	4314.71	6089.43	2882.14	3191.14	3935.14	1178.66	4212.29	3374.14	2271.14	3638.14	4051	1842.86	5202.07	3563.14	3793.21	3844.57	0.684947	0.729174	0.739046			NWMN_2530	transcriptional regulator Crp/Fnr	0.808303	1.20405	0.605484	SA2424	arcR	NWMN_2530	transcriptional regulator Crp/Fnr
NWMN_0370	hypothetical protein	2126	4580	1511	2052	3020	610.3	2107	2262	1286	2271	2256	742.9	3353	2536	2184.5	2263.5	0.756338	0.651506	0.675067			NWMN_0540	hypothetical protein	0.751399	0.66981	0.606634	SA0535	vraC	vraC	hypothetical protein
NWMN_0371	alkyl hydroperoxide reductase subunit F	41007	34974	26879	26319	39406	32301	30944	34275	27566	32268	35682	28997	37990.5	32862.5	32609.5	33975	0.865019	0.858359	0.894303	O		NWMN_0934	phosphoribosylaminoimidazole carboxylase ATPase subunit	1.00863	0.512803	0.606886	SA0917	purK	purK	phosphoribosylaminoimidazole carboxylase ATPase subunit
NWMN_0372	alkyl hydroperoxide reductase subunit C	63267	63572.5	33819.5	53087.5	62855.5	54122.5	53602	43832	44027.5	43796	57844.5	51134	63419.8	57971.5	48717	50820.2	0.914092	0.768168	0.801332	O		NWMN_1711	ABC transporter	0.642294	0.7936	0.607216		epiF	bsaF	ABC transporter
NWMN_0373	NAD(P)H-flavin oxidoreductase	1576	2690	770.5	1538	2588	1326	1736	931.7	887.5	112.4	1550	785.2	2133	2063	1333.85	831.2	0.967182	0.62534	0.389686	C		NWMN_0961	branched-chain alpha-keto acid dehydrogenase subunit E2	0.88541	0.53266	0.607352	SA0945	pdhC	pdhC	branched-chain alpha-keto acid dehydrogenase subunit E2
NWMN_0374	sodium:dicarboxylate symporter	1623	2520	1548	578.7	870.2	984.8	1843	3870	2619	1789	4127	3545	2071.5	724.45	2856.5	2958	0.349722	1.37895	1.42795	R		NWMN_2305	hypothetical protein	0.965815	0.597885	0.607823	SA2193	-	NWMN_2305	hypothetical protein
NWMN_0375	hypothetical protein	8777.5	9025	1786.5	4326.5	4848.5	1425.1	8542	4069.5	2552.5	5587	4958.5	1535.15	8901.25	4587.5	6305.75	5272.75	0.515377	0.708412	0.592361			NWMN_0092	hypothetical protein	0.818946	0.534154	0.608108		-	NWMN_0092	hypothetical protein
NWMN_0376	hypothetical protein	23331	24574	12358	9611	14761	14095	16461	12397	11989	14351	14196	8748	23952.5	12186	14429	14273.5	0.508757	0.602401	0.595909			NWMN_1088	cell division protein MraZ	0.64097	0.356321	0.60837	SA1021	mraZ	NWMN_1088	cell division protein MraZ
NWMN_0377	hypothetical protein	4120	5742	6467	4568	4188	2609	11910	6910	7760	6410	6297	5361	4931	4378	9410	6353.5	0.887852	1.90834	1.28848			NWMN_0212	hypothetical protein	0.646517	0.865492	0.608587	SA0267	-	NWMN_0212	hypothetical protein
NWMN_0378	xanthine phosphoribosyltransferase	36951	39059	16129	23800	39267	17597	23106	24494	14612	26856	30440	10191	38005	31533.5	23800	28648	0.82972	0.626233	0.753796	F		NWMN_0059	Iron-regulated ABC transporter siderophore-binding protein	0.518404	0.673836	0.608647	SA0111	sirA	sirA	Iron-regulated ABC transporter siderophore-binding protein
NWMN_0379	xanthine permease	48405	52695	21096	30365	41916	25647	26564	31738	17957	30332	37611	12248	50550	36140.5	29151	33971.5	0.714946	0.576677	0.672038	F		NWMN_0672	aldo/keto reductase	0.503504	0.83812	0.610564	SA0658	yvgN	NWMN_0672	aldo/keto reductase
NWMN_0380	inosine-5'-monophosphate dehydrogenase	63748	65157	42424	41046	65185	44461	46087	53792	36822	47792	64194	33353	64452.5	53115.5	49939.5	55993	0.824103	0.774826	0.868748	F		NWMN_0586	hypothetical protein	0.562033	0.692645	0.610856	SA0571	-	NWMN_0586	hypothetical protein
NWMN_0381	bifunctional GMP synthase/glutamine amidotransferase protein	31476	31900	23979	19408	29448	20674	28501	26433	20369	23995	33420	17500	31688	24428	27467	28707.5	0.770891	0.866795	0.905942	F		NWMN_2098	galactose-6-phosphate isomerase subunit LacB	0.65103	0.575081	0.611318	SA1996	lacB	lacB	galactose-6-phosphate isomerase subunit LacB
NWMN_0382	hypothetical protein	822.4	852.7	295.8	338.7	520.7	227.6	580.4	283.7	292.7	21.43	482.9	254.4	837.55	429.7	432.05	252.165	0.513044	0.51585	0.301075			NWMN_0253	PfkB family carbohydrate kinase	1.08321	0.48973	0.61215	SA0299	-	NWMN_0253	PfkB family carbohydrate kinase
NWMN_0383	hypothetical protein	270.55	294.85	117.97	137.375	155.595	78.495	264.4	143.85	111.45	169.45	160.15	73.73	282.7	146.485	204.125	164.8	0.518164	0.722055	0.58295	T		NWMN_2104	aldo/keto reductase	1.22194	0.852916	0.612234	SA2001	akr5F	NWMN_2104	aldo/keto reductase
NWMN_0384	transposase	350.8	474.7	259.9	157	182.6	114.8	290.5	240.8	221.3	318.2	291.4	183.7	412.75	169.8	265.65	304.8	0.411387	0.64361	0.738462	L		NWMN_0976	hypothetical protein	0.813664	0.598163	0.612381	SA0960	-	NWMN_0976	hypothetical protein
NWMN_0386	hypothetical protein	543	783.4	416.3	546.8	793.9	559.6	400.7	406.2	331.1	391.4	439.6	326.2	663.2	670.35	403.45	415.5	1.01078	0.608338	0.626508	S		NWMN_1282	indole-3-glycerol-phosphate synthase	0.552938	0.621078	0.613328	SA1202	trpC	trpC	indole-3-glycerol-phosphate synthase
NWMN_0387	hypothetical protein	1292.13	1389	643.4	1077.07	1865.67	1095.27	632.467	767.3	496.167	634.367	797.733	510.6	1340.57	1471.37	699.883	716.05	1.09757	0.52208	0.53414	M		NWMN_2268	L-lactate permease	1.01537	0.809765	0.613506	SA2156	lctP	NWMN_2268	L-lactate permease
NWMN_0388	superantigen-like protein	3071	1654	3410	1502	2386	4613	2042	1644	4351	1921	1802	2667	2362.5	1944	1843	1861.5	0.822857	0.780106	0.787937			NWMN_0331	luciferase-like monooxygenase	0.801292	0.710146	0.613607	SA0327	-	NWMN_0331	luciferase-like monooxygenase
NWMN_0389	superantigen-like protein	105	71.49	66.04	66.63	89.3	96.62	95.37	93.65	59.32	78.09	71.46	63.81	88.245	77.965	94.51	74.775	0.883506	1.071	0.847357			NWMN_0170	acyl-CoA synthetase FadE-like protein	0.817148	0.23722	0.614295	SA0226	fadE	fadE	acyl-CoA synthetase FadE-like protein
NWMN_0390	superantigen-like protein	902.6	566.7	398.1	324.3	410.8	397.9	383.6	342.6	270.8	423.2	373.8	336.9	734.65	367.55	363.1	398.5	0.500306	0.494249	0.542435			NWMN_0580	endonuclease III	0.997751	0.51946	0.6146	SA0565	-	NWMN_0580	endonuclease III
NWMN_0391	superantigen-like protein	146.4	108.8	81.04	96.6	122	73.2	80.03	98.04	77.13	99.37	95	102.1	127.6	109.3	89.035	97.185	0.856583	0.697766	0.761638			NWMN_0217	hypothetical protein	0.806069	0.187197	0.614718		-	NWMN_0217	hypothetical protein
NWMN_0392	superantigen-like protein 5	37.14	36.95	15.62	37.99	31.62	14.23	94.11	25.14	23.75	43.29	27.75	20.55	37.045	34.805	59.625	35.52	0.939533	1.60953	0.958834			NWMN_2390	hypothetical protein	0.439082	0.6967	0.614938	SA2281	-	NWMN_2390	hypothetical protein
NWMN_0393	superantigen-like protein	79.55	49.78	18.77	44.39	49.93	34.33	151.6	32.47	26.79	51.64	40.65	24.02	64.665	47.16	92.035	46.145	0.729297	1.42326	0.713601			NWMN_0786	FeS assembly protein SufD	0.517506	0.790473	0.615039	SA0775	sufD	sufD	FeS assembly protein SufD
NWMN_0394	superantigen-like protein 7	80.95	79.84	31.1	81.48	88.3	35.06	61.71	56.08	43.2	84.47	74.85	40.37	80.395	84.89	58.895	79.66	1.05591	0.73257	0.990858			NWMN_2538	hypothetical protein	0.445692	0.374171	0.61569	SA2432	-	NWMN_2538	hypothetical protein
NWMN_0395	superantigen-like protein	147.4	175.3	76.37	128	136.1	81.01	203.2	102.9	108	188.4	140.4	73.65	161.35	132.05	153.05	164.4	0.818407	0.948559	1.0189			NWMN_0860	oligopeptide ABC transporter substrate-binding protein	0.660408	0.538166	0.615827	SA0849	oppA	NWMN_0860	oligopeptide ABC transporter substrate-binding protein
NWMN_0396	superantigen-like protein	92.86	106.8	50.42	76.18	78.51	39.08	59.39	59.12	41.17	97.76	70.22	37.26	99.83	77.345	59.255	83.99	0.774767	0.593559	0.84133			NWMN_1598	hypothetical protein	0.648357	0.614588	0.616089	SA1526	-	NWMN_1598	hypothetical protein
NWMN_0397	superantigen-like protein	443.3	391.2	174.1	381.2	331.1	156	486.7	259.1	1207	371	249.1	166.9	417.25	356.15	372.9	310.05	0.853565	0.893709	0.74308			NWMN_0215	hypothetical protein	0.65002	0.501892	0.6162	SA0269	-	NWMN_0215	hypothetical protein
NWMN_0398	type I restriction-modification system M subunit	4537	5654	914.7	3812	3814	605.5	2864	2624	877.4	3904	3289	486.5	5095.5	3813	2744	3596.5	0.748307	0.538514	0.705819	V		NWMN_0196	murein hydrolase regulator LrgA	0.785452	0.599942	0.616238	SA0252	lrgA	lrgA	murein hydrolase regulator LrgA
NWMN_0399	restriction modification system specificity subunit	2845	2870	841.8	1894	1923	520.8	1840	1004	569.7	119.2	2219	387.1	2857.5	1908.5	1422	1169.1	0.667892	0.497638	0.409134	V		NWMN_0444	recombination protein RecR	0.749097	0.499904	0.617697	SA0438	recR	recR	recombination protein RecR
NWMN_0400	superantigen-like protein	202.9	118.2	56.15	116	99.13	67.97	228.7	92.46	81.74	374.3	150.7	98.03	160.55	107.565	160.58	262.5	0.669978	1.00019	1.635			NWMN_1330	N-acetylglucosaminyl transferase	0.713987	0.691024	0.61835	SA1251	murG	murG	N-acetylglucosaminyl transferase
NWMN_0401	hypothetical protein	710.34	301.04	272.9	222.64	313.12	250.06	668.34	330.58	272.04	344.84	251.86	243.06	505.69	267.88	499.46	298.35	0.529732	0.98768	0.589986			NWMN_1686	o-succinylbenzoic acid--coa ligase	0.772005	0.54428	0.618573	SA1615	menE	memE	o-succinylbenzoic acid--coa ligase
NWMN_0402	hypothetical protein	2445.43	3876.57	3608.71	1843.86	2751.29	2323.43	3595.71	3950.71	3827.29	2660.14	3674	2712	3161	2297.57	3773.21	3167.07	0.72685	1.19368	1.00192			NWMN_1390	ATP-dependent DNA helicase RecQ	0.696441	0.672102	0.61874	SA1313	recQ2	NWMN_1390	ATP-dependent DNA helicase RecQ
NWMN_0403	hypothetical protein	321.5	352.9	112	271.5	332.7	106.6	198.7	183.9	101.8	285.5	184.8	55.5	337.2	302.1	191.3	235.15	0.895907	0.567319	0.697361			NWMN_1662	riboflavin biosynthesis protein RibD	1.03701	0.52685	0.618858	SA1589	ribD	ribD	riboflavin biosynthesis protein RibD
NWMN_0404	staphylococcal tandem lipoprotein	785.9	767.1	366.8	589.4	689.1	422.3	597.7	424.9	334.2	675.6	464.9	262	776.5	639.25	511.3	570.25	0.823245	0.658467	0.734385			NWMN_2267	malate:quinone oxidoreductase	0.773111	0.542813	0.618898	SA2155	mqo1	mqo	malate:quinone oxidoreductase
NWMN_0405	staphylococcal tandem lipoprotein	409.3	613.4	351.4	274.6	405	303.1	373.2	292	262.8	369.4	306	192.4	511.35	339.8	332.6	337.7	0.664515	0.650435	0.660409			NWMN_1102	hypothetical protein	0.967914	0.560273	0.621321	SA1035	-	NWMN_1102	hypothetical protein
NWMN_0406	staphylococcal tandem lipoprotein	211.4	177	120.9	127.9	152.8	113.2	133.5	309.7	71.1	134	128.3	73.58	194.2	140.35	221.6	131.15	0.722709	1.14109	0.675335			NWMN_0679	radical activating enzyme	0.610206	0.792449	0.621512	SA0665	queE	NWMN_0679	radical activating enzyme
NWMN_0408	staphylococcal tandem lipoprotein	591	568.1	194.5	382.5	366.5	210.9	394.3	276.7	181	1154	264.8	124.1	579.55	374.5	335.5	709.4	0.646191	0.578897	1.22405			NWMN_0857	oligopeptide ABC transporter permease protein	0.774274	0.451131	0.62174	SA0846	oppC	oppC	oligopeptide ABC transporter permease protein
NWMN_0409	staphylococcal tandem lipoprotein	554.1	597.7	153.3	384.1	463.3	202.9	385.4	286.5	189	358.4	318.7	123.1	575.9	423.7	335.95	338.55	0.735718	0.583348	0.587862			NWMN_2520	hypothetical protein	0.48842	0.581025	0.621858		-	NWMN_2520	hypothetical protein
NWMN_0410	staphylococcal tandem lipoprotein	1850	1509	716.7	1158	1239	1014	1565	780.8	584.2	1271	846.1	576.3	1679.5	1198.5	1172.9	1058.55	0.713605	0.698363	0.630277			NWMN_2200	Na+/H+ antiporter NhaC	0.641362	0.902713	0.622165	SA2094	nhaC	nhaC	Na+/H+ antiporter NhaC
NWMN_0412	staphylococcal tandem lipoprotein	5942	9232	1577	5894	6765	3902	5717	2490	3643	322.5	2184	2999	7587	6329.5	4103.5	1253.25	0.834256	0.540859	0.165184			NWMN_1631	hypothetical protein	0.557417	1.20791	0.622845	SA1559	-	NWMN_1631	hypothetical protein
NWMN_0413	hypothetical protein	6470	10098	4160	5547	7127	4375	5645	6389	4137	7239	6844	3095	8284	6337	6017	7041.5	0.764969	0.72634	0.850012	U		NWMN_0840	hypothetical protein	0.683826	0.869336	0.623197	SA0830	-	NWMN_0840	hypothetical protein
NWMN_0414	hypothetical protein	6891	11152	4920	7269	9074	5251	6153	7068	4949	7859	7797	3563	9021.5	8171.5	6610.5	7828	0.905781	0.73275	0.867705			NWMN_2519	glutathione peroxidase	0.631174	0.676306	0.623336	SA2414	gpxA2	NWMN_2519	glutathione peroxidase
NWMN_0415	hypothetical protein	3323	5638	2276	3811	4395	2363	3412	3597	2771	4639	4412	2022	4480.5	4103	3504.5	4525.5	0.915746	0.782167	1.01004			NWMN_0428	ABC transporter substrate-binding protein	0.60417	0.840166	0.623869	SA0422	-	NWMN_0428	ABC transporter substrate-binding protein
NWMN_0416	hypothetical protein	1425	2152	1286	1121	1725	1320	1268	1829	1459	1899	1918	1205	1788.5	1423	1548.5	1908.5	0.795639	0.865809	1.0671			NWMN_0351	Cys/Met metabolism PLP-dependent enzyme	0.301019	0.558973	0.623953	SA0347	metB	NWMN_0351	Cys/Met metabolism PLP-dependent enzyme
NWMN_0417	cobalamin synthesis protein	104.7	128.2	93.06	99.5	128.9	89.33	71.65	108.2	110.3	114.7	121.6	76.93	116.45	114.2	89.925	118.15	0.980678	0.77222	1.0146	R		NWMN_0332	NADPH-dependent FMN reductase	0.825068	0.864155	0.623986	SA0328	-	NWMN_0332	NADPH-dependent FMN reductase
NWMN_0418	NADH dehydrogenase subunit 5	3578	3258	472.8	2033	3569	2692	2241	1379	1415	1433	3227	1711	3418	2801	1810	2330	0.819485	0.529549	0.681685	C		NWMN_1586	alkaline phosphatase synthesis transcriptional regulatory protein	0.723182	0.764829	0.62457	SA1516	phoP	phoP	alkaline phosphatase synthesis transcriptional regulatory protein
NWMN_0419	hypothetical protein	2840	2230.5	1248	1598.5	2844.5	2668.5	1505.5	1781.5	1554.5	1464.5	2309.5	1728.5	2535.25	2221.5	1643.5	1887	0.876245	0.64826	0.744305	S		NWMN_1851	nicotinate phosphoribosyltransferase	0.711837	0.560805	0.62468	SA1729	pncB	nadC	nicotinate phosphoribosyltransferase
NWMN_0420	hypothetical protein	3852	5068	2709	3305	4316	3010	3470	3087	2886	3525	3788	2180	4460	3810.5	3278.5	3656.5	0.854372	0.73509	0.819843	S		NWMN_2300	assimilatory nitrite reductase [NAD(P)H] large subunit	1.38808	0.527716	0.625371	SA2188	nasD	nirB	assimilatory nitrite reductase [NAD(P)H] large subunit
NWMN_0421	hypothetical protein	1781	1988	760.3	1226	1507	560.4	1307	1086	706.9	1576	1379	599.3	1884.5	1366.5	1196.5	1477.5	0.725126	0.634916	0.784028	I		NWMN_0678	hypothetical protein	0.757516	0.869952	0.626045	SA0664	-	NWMN_0678	hypothetical protein
NWMN_0422	hypothetical protein	1476.71	1587.57	678.029	1012.17	1246.86	564.9	1331.43	817.029	651.6	1114.14	1289	593.771	1532.14	1129.51	1074.23	1201.57	0.737212	0.701128	0.784242	R		NWMN_0386	hypothetical protein	1.01078	0.608338	0.626508	SA0380	-	NWMN_0386	hypothetical protein
NWMN_0423	sodium-dependent symporter protein	54.78	105.335	21.565	49.775	53.935	30.55	55.46	40.635	30.605	49.35	43.2	32.785	80.0575	51.855	48.0475	46.275	0.647722	0.600162	0.578022	R		NWMN_1962	ketol-acid reductoisomerase	0.173459	0.533728	0.626543	SA1861	ilvC	ilvC	ketol-acid reductoisomerase
NWMN_0424	cysteine synthase	138.8	88.14	63.19	103.9	96.51	94.17	116.6	89.57	51.86	90.83	90.3	91.26	113.47	100.205	103.085	90.565	0.883097	0.908478	0.79814	E		NWMN_0524	sdrD protein	0.361646	0.512785	0.62691	SA0520	sdrD	sdrD	sdrD protein
NWMN_0425	trans-sulfuration enzyme	198.9	188.4	99.86	173.1	190.8	120.6	227.7	113.7	88.57	173.8	152.7	99.27	193.65	181.95	170.7	163.25	0.939582	0.881487	0.843016	E		NWMN_2276	hypothetical protein	0.729915	0.894444	0.626923	SA2164	yhgE	NWMN_2276	hypothetical protein
NWMN_0426	ABC transporter ATP-binding protein	227.7	282.8	104.8	170	227.1	164.7	211.7	375.2	126.5	216	235.2	105.1	255.25	198.55	293.45	225.6	0.777865	1.14966	0.883839	P		NWMN_1716	gallidermin superfamily epiA protein	0.667711	0.610602	0.626988		epiA	bsaA2	gallidermin superfamily epiA protein
NWMN_0427	ABC transporter permease protein	577.256	580.267	396.722	323.9	461.656	538.367	566.4	356.778	317.411	412.172	494.989	311.778	578.761	392.778	461.589	453.581	0.678653	0.797546	0.783709	P		NWMN_0300	hypothetical protein	0.79902	0.586505	0.627163		-	NWMN_0300	hypothetical protein
NWMN_0428	ABC transporter substrate-binding protein	1719	1662	1181	867.7	1175	1063	1852	988.6	909.5	974.3	1135	977.1	1690.5	1021.35	1420.3	1054.65	0.60417	0.840166	0.623869	P		NWMN_0609	tagB protein	0.713235	0.453343	0.627493		tagB	tagB	tagB protein
NWMN_0429	secretory antigen SsaA-like protein	17301	19698	5547	17849	26323	8913	6753	7769	3025	16376	10984	2919	18499.5	22086	7261	13680	1.19387	0.392497	0.739479	M		NWMN_2258	teicoplanin resistance operon transcriptional regulator TcaR	0.558634	1.0857	0.628196	SA2147	tcaR	tcaR	teicoplanin resistance operon transcriptional regulator TcaR
NWMN_0430	hypothetical protein	310.1	475.3	66.9	269.7	568.7	225.5	371.8	0.01	131.4	228.2	163.3	107.4	392.7	419.2	185.905	195.75	1.06748	0.473402	0.498472			NWMN_0913	2-succinyl-6-hydroxy-2,4-cyclohexadiene-1-carboxylic acid synthase/2-oxoglutarate decarboxylase	0.661898	0.75429	0.628322	SA0896	menD	memD	2-succinyl-6-hydroxy-2,4-cyclohexadiene-1-carboxylic acid synthase/2-oxoglutarate decarboxylase
NWMN_0431	MutT/nudix	1271	1835	864.4	1336	1560	924.5	1451	1065	804.6	1822	1437	787.6	1553	1448	1258	1629.5	0.932389	0.810045	1.04926	L		NWMN_2349	amino acid permease	0.515966	0.517262	0.628606	SA2239	-	NWMN_2349	amino acid permease
NWMN_0432	hypothetical protein	531.9	623.5	264.7	352.7	537.7	432.7	554.2	286.5	325	489	428	635.8	577.7	445.2	420.35	458.5	0.770642	0.727627	0.793665	K		NWMN_0555	phosphomevalonate kinase	0.696855	1.13497	0.628783	SA0549	mvaK2	mvaK2	phosphomevalonate kinase
NWMN_0433	hypothetical protein	1552	2550	1058	1578	2768	1204	1326	1422	889.2	1653	1995	615.8	2051	2173	1374	1824	1.05948	0.669917	0.889322	S		NWMN_1637	thioredoxin-like protein	0.727677	0.814083	0.629054	SA1565	-	NWMN_1637	thioredoxin-like protein
NWMN_0434	hypothetical protein	1687	2583	326	1798	2155	305.9	1246	883.9	289.1	1056	946.1	119.7	2135	1976.5	1064.95	1001.05	0.925761	0.498806	0.468876	S		NWMN_0856	oligopeptide transport system permease protein	0.852081	0.503354	0.629397	SA0845	oppB	NWMN_0856	oligopeptide transport system permease protein
NWMN_0435	LysR family transcriptional regulator	332.3	491	61.5	252.3	304.2	52.36	182	191.2	65.91	290.2	233.6	35.37	411.65	278.25	186.6	261.9	0.675938	0.453298	0.63622	K		NWMN_0940	phosphoribosylglycinamide formyltransferase	0.738155	0.560154	0.62971	SA0924	purN	purN	phosphoribosylglycinamide formyltransferase
NWMN_0436	glutamate synthase large subunit	391.6	469.7	230.7	190.4	436.3	292.2	217.9	316.3	214.4	296.3	361.4	236.2	430.65	313.35	267.1	328.85	0.727621	0.620225	0.763613	E		NWMN_1887	phi PVL orfs 18-19-like protein	0.795675	0.653255	0.630077	SA1765	-	NWMN_1887	phi PVL orfs 18-19-like protein
NWMN_0437	glutamate synthase subunit beta	657.3	718.314	389.529	323.343	655.243	670.129	388.957	537.357	420.086	447.629	550.329	401.014	687.807	489.293	463.157	498.979	0.711381	0.673382	0.725463	E		NWMN_2487	hypothetical protein	0.718301	1.01317	0.630259	SA2374	-	NWMN_2487	hypothetical protein
NWMN_0438	PTS system trehalose-specific IIBC component	1416	650.4	695.5	872.1	653.1	697.5	1904	629.7	671	1424	736.9	911	1033.2	762.6	1266.85	1080.45	0.738095	1.22614	1.04573	G		NWMN_2545	LPXTG cell wall surface anchor	0.642133	0.689038	0.630276	SA2439	sasF	NWMN_2545	LPXTG cell wall surface anchor
NWMN_0439	alpha amylase	730.9	432.4	389.1	487.6	560.2	604.6	801.9	369.3	317.6	648.8	388.9	396.9	581.65	523.9	585.6	518.85	0.900713	1.00679	0.892031	G		NWMN_0410	staphylococcal tandem lipoprotein	0.713605	0.698363	0.630277	SA0405	lpl7nm	lpl7nm	staphylococcal tandem lipoprotein
NWMN_0440	trehalose operon repressor	488.9	400.7	288	444.1	434.4	391.1	626.5	278.1	278.4	519	327.4	306	444.8	439.25	452.3	423.2	0.987522	1.01686	0.951439	K		NWMN_1493	hypothetical protein	0.730314	0.624693	0.631088	SA1419	ubiE	NWMN_1493	hypothetical protein
NWMN_0441	acetyltransferase GNAT	2083	1865.57	719.143	1627.29	1907.71	858.357	1411.86	1134.57	700.171	2262.43	1468.71	588.343	1974.29	1767.5	1273.21	1865.57	0.89526	0.644899	0.944935	R		NWMN_2404	transcriptional regulator MerR	0.517517	0.721535	0.631474	SA2296	-	NWMN_2404	transcriptional regulator MerR
NWMN_0442	DNA polymerase III gamma subunit	5978	7024	2215	4991	7470	3146	3471	3878	1885	5664	4511	1506	6501	6230.5	3674.5	5087.5	0.958391	0.565221	0.782572	L		NWMN_1674	CrcB-like protein	0.754009	0.587005	0.631655	SA1601	crcB	NWMN_1674	CrcB-like protein
NWMN_0443	hypothetical protein	20367	23235	13626	16440	24180	16130	16053	18404	12586	22458	20905	11274	21801	20310	17228.5	21681.5	0.931609	0.790262	0.994519	S		NWMN_0447	hypothetical protein	0.765801	0.666634	0.632337	SA0441	-	NWMN_0447	hypothetical protein
NWMN_0444	recombination protein RecR	3960	5454	854.7	3081	3971	2127	4466	240.1	2222	2495	3320	1919	4707	3526	2353.05	2907.5	0.749097	0.499904	0.617697	L		NWMN_1116	orotate phosphoribosyltransferase	0.877846	0.509338	0.632662	SA1048	pyrE	pyrE	orotate phosphoribosyltransferase
NWMN_0445	Orn/Lys/Arg decarboxylase	689.1	786	293	609.9	686.5	289.4	763.5	452.6	309.9	754.6	520	213.4	737.55	648.2	608.05	637.3	0.878856	0.824419	0.864077	E		NWMN_2412	ABC transporter ATP-binding protein	0.753371	0.371239	0.632902	SA2302	-	NWMN_2412	ABC transporter ATP-binding protein
NWMN_0446	thymidylate kinase	1108	1255	2753	995.3	1226	633.7	1045	776.1	526.3	1085	833.7	343.8	1181.5	1110.65	910.55	959.35	0.940034	0.770673	0.811976	F		NWMN_2231	imidazolonepropionase	0.851153	0.797275	0.634172	SA2121	hutI	hutI	imidazolonepropionase
NWMN_0447	hypothetical protein	5904	4301	3013	3803	4012	3167	4157	2646	2471	3832	2621	2175	5102.5	3907.5	3401.5	3226.5	0.765801	0.666634	0.632337	S		NWMN_1216	glutamine synthetase repressor	0.678183	0.629234	0.634536	SA1149	glnR	glnR	glutamine synthetase repressor
NWMN_0448	DNA polymerase III delta prime subunit	4292	6121	1725	3449	4695	686.5	3139	2915	1210	3428	2826	561.9	5206.5	4072	3027	3127	0.782099	0.581389	0.600595	L		NWMN_1646	ribosomal small subunit pseudouridine synthase A	0.959655	0.645776	0.635086	SA1574	rsuA	NWMN_1646	ribosomal small subunit pseudouridine synthase A
NWMN_0449	hypothetical protein	4177	6224	2399	3467	4062	1388	3709	3395	1977	4194	3217	1008	5200.5	3764.5	3552	3705.5	0.723873	0.683011	0.712528	S		NWMN_1306	dihydrodipicolinate synthase	0.690455	0.505004	0.635724	SA1227	dapA	dapA	dihydrodipicolinate synthase
NWMN_0450	DNA replication intiation control protein YabA	757.8	1111	425.8	706.8	796	282.7	868.1	569.1	385.9	789.1	708.1	259.9	934.4	751.4	718.6	748.6	0.804152	0.76905	0.801156	S		NWMN_1143	ribonuclease III	0.887521	0.391197	0.635897	SA1076	rnc	rnc	ribonuclease III
NWMN_0451	hypothetical protein	179.5	105	38.14	104.5	104.3	58.44	81.07	83.12	41.19	140.8	67.26	31.33	142.25	104.4	82.095	104.03	0.733919	0.577118	0.731318	R		NWMN_0435	LysR family transcriptional regulator	0.675938	0.453298	0.63622	SA0429	gltC	gltC	LysR family transcriptional regulator
NWMN_0452	tetrapyrrole methylase	575.9	449.8	172	483.7	430.7	173.8	379.4	245.2	154.6	484.9	356.8	126.3	512.85	457.2	312.3	420.85	0.891489	0.60895	0.82061	R		NWMN_1673	hypothetical protein	0.784878	0.662584	0.636493	SA1600	-	NWMN_1673	hypothetical protein
NWMN_0453	methionyl-tRNA synthetase	4576	5253	836.6	5058	4861	734.9	3873	2597	869.8	4540	3558	571.2	4914.5	4959.5	3235	4049	1.00916	0.658256	0.823888	R		NWMN_0530	hypothetical protein	0.605578	0.459838	0.636737	SA0525	bshB2	NWMN_0530	hypothetical protein
NWMN_0454	TatD related DNase	4140	4786	2593	3972	4889	2916	3736	3611	2500	5254	4592	2215	4463	4430.5	3673.5	4923	0.992718	0.823101	1.10307	L		NWMN_0076	polysaccharide extrusion protein	0.803027	0.68731	0.636911	SA0127	-	NWMN_0076	polysaccharide extrusion protein
NWMN_0455	hypothetical protein	2606.57	3123.86	1455.57	2674.71	3419.14	1618.29	2076.86	1925.43	1444.71	2656.43	2240.57	1198.57	2865.21	3046.93	2001.14	2448.5	1.06342	0.698427	0.854561	L		NWMN_1224	hypothetical protein	0.793268	0.541692	0.637002		-	NWMN_1224	hypothetical protein
NWMN_0456	dimethyladenosine transferase	1818	1945	360.5	1237	2113	838.2	1779	994.4	888.4	137.9	803.6	657.3	1881.5	1675	1386.7	470.75	0.890247	0.737018	0.250199	J		NWMN_1374	hypothetical protein	0.706473	0.389836	0.637202	SA1296	-	NWMN_1374	hypothetical protein
NWMN_0457	hypothetical protein	1754	1405	2059	1992	1297	1126	4331	2143	2435	2024	1901	1885	1579.5	1644.5	3237	1962.5	1.04115	2.04938	1.24248	S		NWMN_2394	staphylococcal accessory regulator U	0.622329	0.824374	0.637409	SA2287	sarH2	sarU	staphylococcal accessory regulator U
NWMN_0458	4-diphosphocytidyl-2-C-methyl-D-erythritol kinase	8195	8274	3023	6047	7285	2970	6620	6285	2813	8901	6752	2687	8234.5	6666	6452.5	7826.5	0.809521	0.783593	0.950452	I		NWMN_2435	hypothetical protein	0.910609	0.561608	0.637653	SA2324	-	NWMN_2435	hypothetical protein
NWMN_0459	purine operon repressor	65177	65170	65161	65183	65182	65177	65162	65180	65181	65171	65181	65180	65173.5	65182.5	65171	65176	1.00014	0.999962	1.00004	F		NWMN_0250	ABC transporter permease protein	0.592821	1.04824	0.638788	SA0296	-	NWMN_0250	ABC transporter permease protein
NWMN_0460	endoribonuclease L-PSP	65178	65172	65170	65178	65183	65178	65158	65179	65181	65169	65185	65181	65175	65180.5	65168.5	65177	1.00008	0.9999	1.00003	J		NWMN_0910	acetyltransferase	0.938018	0.700358	0.639224	SA0893	-	NWMN_0910	acetyltransferase
NWMN_0461	regulatory protein SpoVG	13695	14923	18094	12516	11773	11951	29271	18297	17714	17424	13868	14367	14309	12144.5	23784	15646	0.848732	1.66217	1.09344	M		NWMN_1825	ORF-X	0.848935	0.441108	0.639389	SA1703	-	NWMN_1825	ORF-X
NWMN_0462	UDP-N-acetylglucosamine pyrophosphorylase	16650	13136	6679	13678	18323	10665	9079	9341	5515	14716	12012	6982	14893	16000.5	9210	13364	1.07436	0.618411	0.897334	M		NWMN_0651	hypothetical protein	0.424811	0.797035	0.640025	SA0637	-	NWMN_0651	hypothetical protein
NWMN_0463	ribose-phosphate pyrophosphokinase	18548	13268	7656	11891	20208	12155	11765	11313	6947	14814	13646	7882	15908	16049.5	11539	14230	1.00889	0.725358	0.894518	F		NWMN_0803	D-alanine--D-alanyl carrier protein ligase	1.00678	0.544117	0.640282	SA0793	dltA	dltA	D-alanine--D-alanyl carrier protein ligase
NWMN_0464	50S ribosomal protein L25/general stress protein Ctc	3635	3287	1807	3431	4418	2279	3108	2357	2021	4446	3305	2267	3461	3924.5	2732.5	3875.5	1.13392	0.789512	1.11976	J		NWMN_0055	protein A	0.910751	0.658354	0.640802	SA0107	spa	spa	protein A
NWMN_0465	peptidyl-tRNA hydrolase	6038	8461	2118	6194	6974	2140	5559	4769	1892	7184	5442	1404	7249.5	6584	5164	6313	0.908201	0.712325	0.870819	J		NWMN_2439	hypothetical protein	0.983747	0.729889	0.64091	SA2328	cidB	cidB	hypothetical protein
NWMN_0466	transcription-repair coupling factor	2568.67	3490.33	1323.33	2017.67	3015	1342.67	2060.67	2205.33	1342	2872.67	2559.33	1070	3029.5	2516.33	2133	2716	0.83061	0.704077	0.896518	L		NWMN_1229	hypothetical protein	0.847321	0.454064	0.640966		-	NWMN_1229	hypothetical protein
NWMN_0467	hypothetical protein	5646	4304	2798	2217	4286	3932	3506	2805	3199	4297	4404	3194	4975	3251.5	3155.5	4350.5	0.653568	0.634271	0.874472	R		NWMN_0830	glycerophosphoryl diester phosphodiesterase	1.75437	0.515479	0.641212	SA0820	glpQ	glpQ	glycerophosphoryl diester phosphodiesterase
NWMN_0468	tetrapyrrole methylase	14344	13351	8183	9327	15162	12708	11062	9463	7901	12318	12306	8044	13847.5	12244.5	10262.5	12312	0.884239	0.741109	0.889114	R		NWMN_2045	hypothetical protein	0.760621	0.520374	0.641293	SA1943	-	NWMN_2045	hypothetical protein
NWMN_0470	hypothetical protein	2970	3386	1548	2157	2397	1497	3181	476	1595	1363	2385	1268	3178	2277	1828.5	1874	0.716488	0.575362	0.589679	J		NWMN_0071	acetoin reductase	0.671978	0.638321	0.641791	SA0122	butA	NWMN_0071	acetoin reductase
NWMN_0471	hypothetical protein	9329	14023	4100	8140	11944	4348	6836	9703	5194	10251	12428	4006	11676	10042	8269.5	11339.5	0.860055	0.708248	0.97118	D		NWMN_1300	phosphate ABC transporter phosphate-binding protein PstS	1.2371	0.733188	0.641792	SA1221	pstS	pstS	phosphate ABC transporter phosphate-binding protein PstS
NWMN_0472	hypoxanthine phosphoribosyltransferase	7690	9976	3257	6388	8992	3363	5668	7136	3888	7732	10595	3445	8833	7690	6402	9163.5	0.870599	0.724782	1.03742	F		NWMN_0647	hypothetical protein	0.56507	0.976919	0.641834	SA0633	-	NWMN_0647	hypothetical protein
NWMN_0473	ATP-dependent metalloprotease FtsH	14241	18378	6702	9987	17487	7986	10420	13117	6780	13347	17003	6100	16309.5	13737	11768.5	15175	0.84227	0.721573	0.930439	O		NWMN_2591	hypothetical protein	0.836785	1.63967	0.641921	SA2485	-	NWMN_2591	hypothetical protein
NWMN_0474	chaperonin HSP33	20304	9389	7562	3760	6321	5693	10078	3832	3203	3753	3512	3890	14846.5	5040.5	6955	3632.5	0.339508	0.468461	0.24467	O		NWMN_0750	SsrA-binding protein	0.990061	0.972908	0.641953	SA0736	smpB	smpB	SsrA-binding protein
NWMN_0475	cysteine synthase-like protein	5292	4842	4442	3737	5619	4953	10535	5056	4166	3583	3136	3285	5067	4678	7795.5	3359.5	0.923229	1.53848	0.663016	E		NWMN_1920	helix-turn-helix domain-containing protein	0.781782	0.65133	0.642387	SA1804	-	NWMN_1920	helix-turn-helix domain-containing protein
NWMN_0476	dihydropteroate synthase	678.8	889.9	408.8	617.4	839.3	603.9	698.8	610.6	371	680.2	549.3	302.8	784.35	728.35	654.7	614.75	0.928603	0.834704	0.78377	H		NWMN_0060	O-Acetyl serine sulfhydrylase	0.590817	0.741723	0.642586	SA0112	sbnA	sbnA	O-Acetyl serine sulfhydrylase
NWMN_0477	dihydroneopterin aldolase	1089	1549	208.8	1189	1283	872.3	1149	20	512.9	421.4	766.3	502.9	1319	1236	584.5	593.85	0.937074	0.443139	0.450227	H		NWMN_1307	dihydrodipicolinate reductase	0.743465	0.668055	0.642609	SA1228	dapB	dapB	dihydrodipicolinate reductase
NWMN_0478	2-amino-4-hydroxy-6-hydroxymethyldihydropteridine pyrophosphokinase	1784	1164	651.6	1332	1698	1153	1288	531.5	635.4	1255	1152	734.7	1474	1515	909.75	1203.5	1.02782	0.617198	0.816486	H		NWMN_0744	phosphoglyceromutase	0.804887	0.371735	0.643738	SA0730	pgm	pgm	phosphoglyceromutase
NWMN_0479	lysyl-tRNA synthetase	4987.71	6284.43	2848.57	5052.71	5423.86	3785.57	4552.71	3670.71	2759	7110	5055.57	2772.14	5636.07	5238.29	4111.71	6082.79	0.929421	0.729536	1.07926	J		NWMN_1668	RNA polymerase sigma-70	0.50726	0.556753	0.644028	SA1595	rpoE1	NWMN_1668	RNA polymerase sigma-70
NWMN_0480	GntR family regulatory protein	197.4	204.071	85.4757	161.271	126.497	71.1029	270.2	115.766	92.8386	188.386	166.586	72.3314	200.736	143.884	192.983	177.486	0.716785	0.961378	0.884176	K		NWMN_2370	AbgT family p-aminobenzoyl-glutamate transporter	1.08018	0.559888	0.644171	SA2261	-	NWMN_2370	AbgT family p-aminobenzoyl-glutamate transporter
NWMN_0481	pyridoxine biosynthesis protein	3885	3297	1496	3800	1899	1071	7068	1825	1453	3716	2566	1558	3591	2849.5	4446.5	3141	0.793512	1.23823	0.874687	H		NWMN_2502	hypothetical protein	0.714951	1.09602	0.644177	SA2398	-	NWMN_2502	hypothetical protein
NWMN_0482	glutamine amidotransferase subunit PdxT	345.3	342.2	197.5	316.1	259.6	180.1	1096	445.9	176.5	421.4	261	169	343.75	287.85	770.95	341.2	0.837382	2.24276	0.992582	H		NWMN_1745	hypothetical protein	0.379863	0.574047	0.644534		-	NWMN_1745	hypothetical protein
NWMN_0483	pyrimidine nucleoside transport protein	6112	8313	476.3	6478	5961	695.8	6242	2508	961.8	5951	4897	563.4	7212.5	6219.5	4375	5424	0.862322	0.606586	0.752028	F		NWMN_2238	hypothetical protein	0.621408	0.612734	0.64486	SA2128	-	NWMN_2238	hypothetical protein
NWMN_0484	transcription repressor of class III stress genes	4028.71	5994.57	1908.29	3271.14	4159.57	2559.71	2563.86	3312.57	1667.29	3793.43	3875	1579	5011.64	3715.36	2938.21	3834.21	0.741345	0.586278	0.765061	K		NWMN_1398	hypothetical protein	1.83138	0.59349	0.64486	SA1317	-	NWMN_1398	hypothetical protein
NWMN_0485	UvrB/UvrC motif-containing protein	10047	14720	5375	7752	11304	5978	5573	7338	4033	8373	8707	4305	12383.5	9528	6455.5	8540	0.769411	0.521299	0.689627	S		NWMN_2242	ABC transporter ATP-binding protein	0.742869	0.59943	0.644866	SA2132	-	NWMN_2242	ABC transporter ATP-binding protein
NWMN_0486	ATP:guanido phosphotransferase	6401	8438	3147	4277	6228	3481	3601	4248	2872	4793	5390	2686	7419.5	5252.5	3924.5	5091.5	0.707932	0.528944	0.686232	E		NWMN_1574	translation initiation factor IF-3	0.91817	0.593747	0.645282	SA1504	infC	infC	translation initiation factor IF-3
NWMN_0487	ATP-dependent Clp protease ATP-binding subunit ClpC	3769	3759	2662	2325	3553	2782	3298	3310	2485	3080	3354	2337	3764	2939	3304	3217	0.780818	0.87779	0.854676	O		NWMN_0688	ABC transporter ATP-binding protein	0.775955	0.5844	0.645586	SA0675	-	NWMN_0688	ABC transporter ATP-binding protein
NWMN_0488	DNA repair protein RadA	8410	9245	4360	7052	10263	6293	6097	6553	3561	10010	8175	3982	8827.5	8657.5	6325	9092.5	0.980742	0.716511	1.03002	O		NWMN_0624	lipase/esterase LipA	1.07566	0.567611	0.646403	SA0610	lipA	lipA	lipase/esterase LipA
NWMN_0489	PIN/TRAM domain-containing protein	4522	4819	2441	3700	4585	3768	3477	2950	2365	4574	4582	2594	4670.5	4142.5	3213.5	4578	0.88695	0.688042	0.980195	R		NWMN_1926	beta-hemolysin	0.56084	0.522702	0.646452	SA1811	hlb	NWMN_1926	beta-hemolysin
NWMN_0490	glutamyl-tRNA synthetase	11956	11605	5728.57	8255.14	14305.4	8550.71	7426.71	9029.86	5639	9793.29	11007.4	5161	11780.5	11280.3	8228.29	10400.4	0.957539	0.698467	0.882845	J		NWMN_1185	DNA translocase FtsK/SpoIIIE	0.298156	0.789513	0.647	SA1119	spoIIIE	ftsK	DNA translocase FtsK/SpoIIIE
NWMN_0491	serine acetyltransferase	13993	22271	9762	9670	21094	14258	6673	12915	9641	12140	15181	7660	18132	15382	9794	13660.5	0.848334	0.54015	0.753392	E		NWMN_0548	hypothetical protein	0.632997	0.81763	0.647192	SA0542	-	NWMN_0548	hypothetical protein
NWMN_0492	cysteinyl-tRNA synthetase	9953	12168	6615	5299	10297	7710	4461	7966	5978	8015	9912	5873	11060.5	7798	6213.5	8963.5	0.705031	0.561774	0.810406	J		NWMN_0591	hypothetical protein	0.680034	0.775217	0.647691	SA0575	-	NWMN_0591	hypothetical protein
NWMN_0493	hypothetical protein	15387	18377	10312	7549	16260	12034	7939	11421	8910	11282	14641	8255	16882	11904.5	9680	12961.5	0.705159	0.573392	0.76777	S		NWMN_0821	monovalent cation/H+ antiporter subunit B	0.818168	0.441932	0.64798	SA0812	mnhB	mnhB	monovalent cation/H+ antiporter subunit B
NWMN_0494	hypothetical protein	11588	13831	7988	5502	11378	8023	6692	8670	7038	7926	10527	6227	12709.5	8440	7681	9226.5	0.66407	0.604351	0.725953	J		NWMN_0989	hypothetical protein	0.669774	0.641959	0.648303	SA0974	-	NWMN_0989	hypothetical protein
NWMN_0495	hypothetical protein	10369	12311	7368	5375	10833	8133	6061	7998	7042	7310	10020	5769	11340	8104	7029.5	8665	0.714638	0.619885	0.764109	R		NWMN_0804	dltB protein	0.893143	0.55587	0.648338	SA0794	dltB	dltB	dltB protein
NWMN_0496	hypothetical protein	9991	10306	5301	4358	8094	5364	5187	7024	4789	6352	9199	4380	10148.5	6226	6105.5	7775.5	0.61349	0.601616	0.766172	K		NWMN_2384	hypothetical protein	0.719388	0.483528	0.648397		-	NWMN_2384	hypothetical protein
NWMN_0497	preprotein translocase subunit SecE	13891	15801	6017	11375	15081	6760	8349	9904	5865	11616	12273	5235	14846	13228	9126.5	11944.5	0.891014	0.614745	0.80456	U		NWMN_2352	hypothetical protein	0.513657	1.28751	0.648457	SA2242	ybbM	NWMN_2352	hypothetical protein
NWMN_0498	transcription antitermination protein	18339	21075	10126	15660	16099	9310	13099	13658	8865	17048	18708	9192	19707	15879.5	13378.5	17878	0.80578	0.67887	0.90719	K		NWMN_0048	drug transporter	0.680089	0.72817	0.648784	SA0099	norC	NWMN_0048	drug transporter
NWMN_0499	50S ribosomal protein L11	15385	14732	7334	12254	15111	8279	11458	11474	7769	13201	13807	7807	15058.5	13682.5	11466	13504	0.908623	0.76143	0.896769	J		NWMN_0065	siderophore biosynthesis IucC	0.714707	0.50905	0.648882	SA0117	sbnF	sbnF	siderophore biosynthesis IucC
NWMN_0500	50S ribosomal protein L1	3258	3397	1422	2706	0.01	1800	2914	2261	1483	3205	2738	1239	3327.5	1353.01	2587.5	2971.5	0.406613	0.777611	0.893013	J		NWMN_0806	poly D-alanine transfer protein	0.890324	0.509876	0.649038	SA0796	dltD	dltD	poly D-alanine transfer protein
NWMN_0501	50S ribosomal protein L10	5373	2697	2177	5364	5271	3930	4438	2837	2590	7710	4477	3723	4035	5317.5	3637.5	6093.5	1.31784	0.901487	1.51016	J		NWMN_1308	2,3,4,5-tetrahydropyridine-2-carboxylate N-succinyltransferase	0.701266	0.561568	0.649497	SA1229	dapD	dapD	2,3,4,5-tetrahydropyridine-2-carboxylate N-succinyltransferase
NWMN_0502	50S ribosomal protein L7/L12	1146	644	630.7	1167	1033	1055	943.1	608.2	657.8	1532	922.4	1053	895	1100	775.65	1227.2	1.22905	0.866648	1.37117	J		NWMN_1963	2-isopropylmalate synthase	0.494174	0.408856	0.649747	SA1862	leuA	leuA	2-isopropylmalate synthase
NWMN_0503	hypothetical protein	2309.5	1970.5	910.65	1598.5	2001	1262.5	1512.5	1270	951.05	1875	1782.5	1108.5	2140	1799.75	1391.25	1828.75	0.841005	0.650117	0.854556	J		NWMN_0670	N-acetylglucosamine-6-phosphate deacetylase	0.983807	0.734472	0.650621	SA0656	nagA	nagA	N-acetylglucosamine-6-phosphate deacetylase
NWMN_0504	DNA-directed RNA polymerase subunit beta	27930.9	23991.9	12973.6	17217.7	26027.3	18607.7	15607	19286.1	13007.9	22228.9	27734	17461.1	25961.4	21622.5	17446.6	24981.4	0.832872	0.672021	0.962254	K		NWMN_0933	phosphoribosylaminoimidazole carboxylase catalytic subunit	1.09376	0.538507	0.65093	SA0916	purE	purE	phosphoribosylaminoimidazole carboxylase catalytic subunit
NWMN_0505	DNA-directed RNA polymerase subunit beta	46873	35841	21063	23128	37557	28716	22405	30986	25040	32421	43607	30103	41357	30342.5	26695.5	38014	0.733673	0.645489	0.919167	K		NWMN_0143	peptide ABC transporter ATP-binding protein	0.804702	0.652533	0.651257	SA0198	oppF	NWMN_0143	peptide ABC transporter ATP-binding protein
NWMN_0506	ribosomal protein L7Ae-like	47402	32657	21997	35237	44702	42107	26524	28203	21925	36419	40630	31779	40029.5	39969.5	27363.5	38524.5	0.998501	0.683583	0.962403	J		NWMN_2413	membrane spanning protein	0.667945	0.41978	0.651907	SA2303	-	NWMN_2413	membrane spanning protein
NWMN_0507	30S ribosomal protein S12	39132	28317	17224	28738	37587	31279	22158	23279	17971	29891	32621	25751	33724.5	33162.5	22718.5	31256	0.983336	0.67365	0.926804	J		NWMN_0883	Na+/alanine symporter	0.97629	0.50721	0.652489	SA0871	agcS	NWMN_0883	Na+/alanine symporter
NWMN_0508	30S ribosomal protein S7	36770	26559	16355	28350	36397	31403	20445	20954	15788	29739	34409	27592	31664.5	32373.5	20699.5	32074	1.02239	0.653713	1.01293	J		NWMN_0050	67 kDa Myosin-crossreactive streptococcal antigen-like protein	1.11605	0.815515	0.653018	SA0102	-	NWMN_0050	67 kDa Myosin-crossreactive streptococcal antigen-like protein
NWMN_0509	elongation factor G	44700.4	29331.2	19014.8	31529.4	38068.8	35613.6	23735.8	27051.6	21163	37763	41832.6	36093.6	37015.8	34799.1	25393.7	39797.8	0.940115	0.686023	1.07516	J		NWMN_1079	carbamate kinase	0.674204	0.807797	0.653401	SA1013	arcC1	arcC	carbamate kinase
NWMN_0510	elongation factor Tu	51828	54497	23326	47060	50235	34364	37682	33131	22567	39280	58733	41144	53162.5	48647.5	35406.5	49006.5	0.915072	0.666005	0.921825	J		NWMN_0119	hypothetical protein	0.585569	0.880038	0.654418	SA0169	-	NWMN_0119	hypothetical protein
NWMN_0511	M20/M25/M40 family peptidase	1485	2479	654.9	1672	2166	752.2	1390	1334	508	1811	1570	395.7	1982	1919	1362	1690.5	0.968214	0.687185	0.852926	R		NWMN_1606	hypothetical protein	0.959466	0.68203	0.654556	SA1534	-	NWMN_1606	hypothetical protein
NWMN_0512	2-amino-3-ketobutyrate coenzyme A ligase	12408	20399	5329	15470	14846	5289	14540	6831	5437	863.3	14253	3968	16403.5	15158	10685.5	7558.15	0.924071	0.651416	0.460764	H		NWMN_2441	transcriptional regulator LysR	0.583353	0.921673	0.654605	SA2330	cidR	NWMN_2441	transcriptional regulator LysR
NWMN_0513	chaperone protein HchA	30791	25391	15947	14069	15587	14464	55516	17089	20129	14122	17336	19069	28091	14828	36302.5	15729	0.527856	1.29232	0.55993	R		NWMN_0636	AraC family transcription regulator	0.61285	0.520306	0.655742	SA0622	-	NWMN_0636	AraC family transcription regulator
NWMN_0514	ribulokinase	2473	3087	476	2702	2721	486.6	2810	1337	496.4	2177	1521	301.9	2780	2711.5	2073.5	1849	0.97536	0.745863	0.665108	C		NWMN_0336	lipoprotein	0.713062	0.529363	0.655799	SA0331	efeO	NWMN_0336	lipoprotein
NWMN_0515	L threonine 3 dehydrogenase	4756.5	7317	3985.5	4473	6337.5	3519.5	5915.5	4745.5	3478.5	6985	5645	3070	6036.75	5405.25	5330.5	6315	0.895391	0.883008	1.04609	M		NWMN_0163	pyruvate formate-lyase 1 activating enzyme	0.886158	1.01841	0.656597	SA0219	pflA	NWMN_0163	pyruvate formate-lyase 1 activating enzyme
NWMN_0516	branched-chain amino acid aminotransferase	11590	18367	3682.57	9642	13982	4877.43	8161	5129.61	3931.14	5055.01	11325	2752.43	14978.5	11812	6645.31	8190.01	0.788597	0.443656	0.546784	E		NWMN_1907	endodeoxyribonuclease RusA	0.766387	0.746203	0.657074		rusA	NWMN_1907	endodeoxyribonuclease RusA
NWMN_0517	haloacid dehalogenase-like hydrolase	6354	10243	4256	4520	7657	3835	5568	5386	3486	5516	6664	2288	8298.5	6088.5	5477	6090	0.733687	0.659999	0.733868	R		NWMN_1628	acetoin utilization protein AcuC	0.86938	0.536469	0.657412	SA1556	acuC	acuC	acetoin utilization protein AcuC
NWMN_0518	deoxynucleoside kinase	2340	3197	1058	1800	2181	665.7	1681	1619	882.6	2143	1550	458.3	2768.5	1990.5	1650	1846.5	0.718981	0.595991	0.666968	F		NWMN_2555	hypothetical protein	0.583823	0.602866	0.657414	SA2449	-	NWMN_2555	hypothetical protein
NWMN_0519	deoxynucleoside kinase	804.3	1398	355.2	812.9	929.9	140.3	703.7	608.5	227.1	1111	570.3	141.8	1101.15	871.4	656.1	840.65	0.791354	0.595832	0.763429	F		NWMN_0075	hypothetical protein	0.628457	0.693592	0.657507	SA0126	cps2H	NWMN_0075	hypothetical protein
NWMN_0520	hypothetical protein	2683	3119	1004	2428	2634	747.6	2030	1390	761.2	2196	1729	455.2	2901	2531	1710	1962.5	0.872458	0.589452	0.676491	F		NWMN_2469	immunodominant antigen A	2.01047	0.564994	0.657947	SA2356	isaA	NWMN_2469	immunodominant antigen A
NWMN_0521	hydrolase haloacid dehalogenase-like	5594	10546	2229	5485	6254	1442	5064	4917	1650	7077	5151	1039	8070	5869.5	4990.5	6114	0.727323	0.618401	0.757621	R		NWMN_1284	tryptophan synthase subunit beta	0.24516	0.650469	0.658486	SA1204	trpB	trpB	tryptophan synthase subunit beta
NWMN_0522	hypothetical protein	863.5	1389.5	459.6	710.7	1023.5	361.9	1092.5	793.2	449.5	925.55	916.2	272.2	1126.5	867.1	942.85	920.875	0.769729	0.836973	0.817466	R		NWMN_2479	amidohydrolase	0.812651	0.689719	0.658775	SA2366	-	NWMN_2479	amidohydrolase
NWMN_0523	sdrC protein	124.6	130.1	39.88	71.4	84.25	50.71	87.16	89.45	51.63	106.5	74.6	35	127.35	77.825	88.305	90.55	0.611111	0.693404	0.711033	M		NWMN_2314	drug resistance transporter EmrB/QacA sub	0.855302	0.815736	0.65962	SA2203	lmrB2	NWMN_2314	drug resistance transporter EmrB/QacA sub
NWMN_0524	sdrD protein	1595	2136	657.6	578.7	770.6	377.9	1047	866.2	605.3	1254	1085	388.9	1865.5	674.65	956.6	1169.5	0.361646	0.512785	0.62691	M		NWMN_2491	hypothetical protein	1.10936	0.963962	0.659622	SA2378	phnB	NWMN_2491	hypothetical protein
NWMN_0525	Ser-Asp rich fibrinogen/bone sialoprotein-binding protein SdrE	1110	4043	1359	1033	2402	1180	927.1	2091	961.2	1050	1911	661.8	2576.5	1717.5	1509.05	1480.5	0.666602	0.585698	0.574617			NWMN_1281	anthranilate phosphoribosyltransferase	0.604845	0.673924	0.659682	SA1201	trpD	trpD	anthranilate phosphoribosyltransferase
NWMN_0526	glycosyl transferase group 1	1219	1857	805.8	1046	1340	838.6	1200	1057	787.1	1526	1268	587	1538	1193	1128.5	1397	0.775683	0.733745	0.908322	M		NWMN_1555	DNA repair protein RadC	0.523323	0.671138	0.660023	SA1485	radC	radC	DNA repair protein RadC
NWMN_0527	glycosyl transferase group 1	3884.29	5478.86	3236.14	3272.57	5271.86	3888.71	3049.29	3202.27	2934.64	3332.96	3641.57	2536.57	4681.57	4272.21	3125.78	3487.26	0.91256	0.667677	0.744892	M		NWMN_0405	staphylococcal tandem lipoprotein	0.664515	0.650435	0.660409		lpl3	NWMN_0405	staphylococcal tandem lipoprotein
NWMN_0529	GTP cyclohydrolase	2892	2664	1116	1550	1597	862.1	2535	1389	946.1	2130	1730	809.8	2778	1573.5	1962	1930	0.566415	0.706263	0.694744	S		NWMN_0833	glucose-6-phosphate isomerase	0.811156	0.668181	0.660436	SA0823	pgi	pgi	glucose-6-phosphate isomerase
NWMN_0530	hypothetical protein	6292	5647	1776	3469	3761	1629	4172	1318	1548	4005	3597	1374	5969.5	3615	2745	3801	0.605578	0.459838	0.636737	S		NWMN_2097	tagatose-6-phosphate kinase	0.6745	0.681712	0.660772	SA1995	lacC	lacC	tagatose-6-phosphate kinase
NWMN_0531	hypothetical protein	4446	4500	1101	3245	2702	1346	2876	2686	1453	3672	2924	1033	4473	2973.5	2781	3298	0.664766	0.62173	0.737313			NWMN_0785	ABC transporter ATP-binding protein	0.630443	0.945642	0.660792	SA0774	sufC	sufC	ABC transporter ATP-binding protein
NWMN_0532	glucosamine-6-phosphate isomerase	4423	5426	2493	4077	4462	2906	4225	2978	2468	5649	4239	2848	4924.5	4269.5	3601.5	4944	0.866992	0.731343	1.00396	G		NWMN_2288	nitrite transport protein	1.29276	0.589638	0.660831	SA2176	narK	NWMN_2288	nitrite transport protein
NWMN_0533	hexulose-6-phosphate synthase	13979	15602	13135	11628	12898	14115	24798	12256	12626	13017	9528	10951	14790.5	12263	18527	11272.5	0.829113	1.25263	0.762145	G		NWMN_0054	L-lactate permease	0.669822	0.944266	0.660957	SA0106	lctP	lctP	L-lactate permease
NWMN_0534	SIS domain-containing protein	13974	15854	10527	12208	12982	14616	24159	10653	10943	11309	8680	9402	14914	12595	17406	9994.5	0.844509	1.16709	0.670142	M		NWMN_1639	hypothetical protein	0.768483	0.614442	0.662174	SA1567	-	NWMN_1639	hypothetical protein
NWMN_0535	hydrolase haloacid dehalogenase-like	614.1	1467	369.4	404.2	619.7	201.6	517.5	538.2	331	732	855.7	192.2	1040.55	511.95	527.85	793.85	0.491999	0.50728	0.762914	R		NWMN_2595	high affinity nickel transporter	0.675865	1.1623	0.662301	SA2489	nixA	NWMN_2595	high affinity nickel transporter
NWMN_0536	proline/betaine transporter	1100	470.1	593.7	625.9	729.7	1328	1537	429.2	489.9	419.4	299.6	524.6	785.05	677.8	983.1	359.5	0.863384	1.25228	0.457933	G		NWMN_0597	monovalent cation/H+ antiporter subunit E	0.491337	0.761221	0.662706	SA0582	mnhE	mnhE	monovalent cation/H+ antiporter subunit E
NWMN_0537	hypothetical protein	97.38	193.6	20.89	199.7	256.8	148.3	151.9	88.33	27.73	75.68	88.12	18.28	145.49	228.25	120.115	81.9	1.56884	0.825589	0.562925			NWMN_1854	sodium-dependent transporter (huNaDC-1)	0.73521	0.712141	0.662796	SA1732	sdcS	NWMN_1854	sodium-dependent transporter (huNaDC-1)
NWMN_0538	long chain fatty acid CoA ligase vraA	153.1	243.5	120.3	122.7	172.2	53.2	79.13	121.8	39.04	142.6	122.2	38.53	198.3	147.45	100.465	132.4	0.74357	0.506631	0.667675	I		NWMN_0936	phosphoribosylformylglycinamidine synthase I	0.869434	0.583487	0.662959	SA0920	purQ	purQ	phosphoribosylformylglycinamidine synthase I
NWMN_0539	acetyl-CoA acetyltransferase	1542	1008	591.6	815.2	1124	736.4	1021	824.5	471.1	837.7	872.1	435.5	1275	969.6	922.75	854.9	0.760471	0.723725	0.67051	I		NWMN_2448	ATP-dependent Clp protease ATP-binding subunit ClpC	1.00604	0.916481	0.662979	SA2336	clpL	clpC	ATP-dependent Clp protease ATP-binding subunit ClpC
NWMN_0540	hypothetical protein	1143	1073	458.5	738.5	926.6	434.5	876.6	607.7	307.7	639.5	704.8	275	1108	832.55	742.15	672.15	0.751399	0.66981	0.606634	J		NWMN_0475	cysteine synthase-like protein	0.923229	1.53848	0.663016	SA0471	cysK	NWMN_0475	cysteine synthase-like protein
NWMN_0541	hypothetical protein	686.35	716.6	324.25	596.9	721.55	388.6	713.45	447.7	271.1	602.05	545.4	250.35	701.475	659.225	580.575	573.725	0.93977	0.827649	0.817884			NWMN_0875	hypothetical protein	0.92198	0.523255	0.663305	SA0863	-	NWMN_0875	hypothetical protein
NWMN_0542	hypothetical protein	7280.43	9250.29	6838.43	20574.6	25058.6	21073.9	24823.6	6875	8288	14334.6	10464.9	11352.6	8265.36	22816.6	15849.3	12399.7	2.76051	1.91756	1.5002			NWMN_2246	sodium/glutamate symporter	0.966375	0.468494	0.664506	SA2135	gltS	NWMN_2246	sodium/glutamate symporter
NWMN_0543	phosphomethylpyrimidine kinase	2970	4422	1501	3018	3515	1552	3565	2708	1494	3676	3087	1109	3696	3266.5	3136.5	3381.5	0.883793	0.84862	0.914908	H		NWMN_0064	siderophore biosynthesis IucA	0.54323	0.536468	0.664627	SA0116	sbnE	sbnE	siderophore biosynthesis IucA
NWMN_0544	uracil-DNA glycosylase	2950	2809	864.6	3481	3108	1087	2591	1702	876.8	3804	2122	654.9	2879.5	3294.5	2146.5	2963	1.14412	0.745442	1.029	L		NWMN_0220	hypothetical protein	0.608717	0.641034	0.664711	SA0272	esaA	NWMN_0220	hypothetical protein
NWMN_0545	hypothetical protein	2994.14	3160.14	958.329	3950	3160.57	1019.17	2873	1886.86	896.614	3714.43	2408.71	710.671	3077.14	3555.29	2379.93	3061.57	1.15539	0.773422	0.99494			NWMN_0514	ribulokinase	0.97536	0.745863	0.665108	SA0510	araB	araB	ribulokinase
NWMN_0546	hypothetical protein	274.6	327.4	124.9	365.1	346.4	332.5	295.6	233.5	131.4	407.3	262.9	122.9	301	355.75	264.55	335.1	1.18189	0.878904	1.11329	S		NWMN_1063	glutamate racemase	1.02988	0.608076	0.666189	SA0997	murI	NWMN_1063	glutamate racemase
NWMN_0547	amino acid permease	2086	1031	1080	722.8	1433	2555	1881	999.9	789.8	1076	681.9	971.1	1558.5	1077.9	1440.45	878.95	0.691627	0.924254	0.563972	E		NWMN_0128	N-acetyl-gamma-glutamyl-phosphate reductase	0.603047	0.457381	0.666461	SA0178	argC	argC	N-acetyl-gamma-glutamyl-phosphate reductase
NWMN_0548	hypothetical protein	6033	3689	3810	2582	3572	4253	5143	2806	2452	3458	2834	2548	4861	3077	3974.5	3146	0.632997	0.81763	0.647192	S		NWMN_0518	deoxynucleoside kinase	0.718981	0.595991	0.666968	SA0514	dck	NWMN_0518	deoxynucleoside kinase
NWMN_0549	hypothetical protein	5082	3122	1993	1937	2645	2693	3675	1950	1936	2494	2273	1807	4102	2291	2812.5	2383.5	0.558508	0.685641	0.581058	S		NWMN_0037	hypothetical protein	0.850145	0.55275	0.667372		-	NWMN_0037	hypothetical protein
NWMN_0550	heme peroxidase	3547	6030	1263.33	3612	5115.33	950.133	4401	3420	1381	3752	4515.67	962.933	4788.5	4363.67	3910.5	4133.83	0.91128	0.816644	0.863284	S		NWMN_1684	MutT/Nudix Hydrolase 8	0.594282	0.574559	0.667397	SA1612	ytkD	NWMN_1684	MutT/Nudix Hydrolase 8
NWMN_0551	phosphotransacetylase	7020.71	6320	3738	5988.86	7470.57	4499.29	8263.43	5065.86	3476.29	6957.57	5829.71	3109.43	6670.36	6729.71	6664.64	6393.64	1.0089	0.999143	0.958516	C		NWMN_2507	hypothetical protein	0.516557	0.859976	0.667451	SA2403	-	NWMN_2507	hypothetical protein
NWMN_0552	lipoate-protein ligase A	7405	6948	4212	6186	7538	4973	8832	4918	4132	7820	6332	3491	7176.5	6862	6875	7076	0.956176	0.957988	0.985996	H		NWMN_0538	long chain fatty acid CoA ligase vraA	0.74357	0.506631	0.667675	SA0533	vraA	vraA	long chain fatty acid CoA ligase vraA
NWMN_0553	mevalonate kinase	5583	1755	2066	1791	1653	1859	4634	1445	2513	1944	1414	1820	3669	1722	3039.5	1679	0.469338	0.828427	0.457618	I		NWMN_2013	F0F1 ATP synthase subunit A	0.949679	0.506367	0.668441	SA1911	atpB	atpB	F0F1 ATP synthase subunit A
NWMN_0554	mevalonate diphosphate decarboxylase	3823	1309	2019	1530	1370	2371	4124	986.9	1053	1622	948.2	1614	2566	1450	2555.45	1285.1	0.565082	0.995889	0.500818	I		NWMN_1457	zinc-specific metalloregulatory protein	0.785801	0.758647	0.668538	SA1383	zur	NWMN_1457	zinc-specific metalloregulatory protein
NWMN_0555	phosphomevalonate kinase	5978	2513	3600	3493	2424	4248	7678	1959	2786	3473	1866	3203	4245.5	2958.5	4818.5	2669.5	0.696855	1.13497	0.628783	I		NWMN_0625	hypothetical protein	0.620807	0.642438	0.668897	SA0611	-	NWMN_0625	hypothetical protein
NWMN_0556	hypothetical protein	544.7	323.5	357	321.6	315.7	348	573.5	264.6	259.2	379.4	234.9	348.4	434.1	318.65	419.05	307.15	0.734047	0.965331	0.707556			NWMN_2187	urea transporter	0.981829	1.0377	0.669155	SA2081	yut	NWMN_2187	urea transporter
NWMN_0557	pyridine nucleotide-disulfide oxidoreductase	783	838.7	426.5	576	566	404.9	624.9	3.761	336	485.6	666.6	355.4	810.85	571	314.33	576.1	0.704199	0.387656	0.710489	C		NWMN_0024	hypothetical protein	0.602476	0.532262	0.669489	SA0078	-	NWMN_0024	hypothetical protein
NWMN_0558	hypothetical protein	788.7	976.3	348.9	582.3	742.2	397.6	596	447.4	298.2	829.3	669.7	256.2	882.5	662.25	521.7	749.5	0.750425	0.591161	0.849292	K		NWMN_0534	SIS domain-containing protein	0.844509	1.16709	0.670142	SA0529	hxlB	NWMN_0534	SIS domain-containing protein
NWMN_0559	hypothetical protein	2873	5391	2133	2071	3295	1405	2993	3224	1600	3332	3004	1054	4132	2683	3108.5	3168	0.649322	0.752299	0.766699	L		NWMN_1832	exonuclease	0.709824	0.704292	0.670482	SA1710	polC	NWMN_1832	exonuclease
NWMN_0561	hypothetical protein	4775	4348	1905	1939	3013	1253	3465	2963	1612	3034	3174	1018	4561.5	2476	3214	3104	0.542804	0.704593	0.680478			NWMN_0539	acetyl-CoA acetyltransferase	0.760471	0.723725	0.67051	SA0534	atoB2	vraB	acetyl-CoA acetyltransferase
NWMN_0562	hypothetical protein	3144	3361	1117	1385	2203	1171	2253	153.1	1219	21.54	2332	921.9	3252.5	1794	1203.05	1176.77	0.551576	0.369885	0.361805			NWMN_0743	triosephosphate isomerase	0.898981	0.750865	0.670673	SA0729	tpiA	tpiA	triosephosphate isomerase
NWMN_0563	hypothetical protein	3169	3468.5	1838.5	1273	2159	1285.6	2634.5	2181.5	1684.5	2445	2564.5	1191.7	3318.75	1716	2408	2504.75	0.517062	0.725574	0.754727			NWMN_1238	hypothetical protein	0.777691	0.568158	0.67103	SA1162	-	NWMN_1238	hypothetical protein
NWMN_0565	hypothetical protein	1707	1999	1027	990.9	1312	681.6	1776	1294	1076	1640	1574	788.2	1853	1151.45	1535	1607	0.621398	0.828386	0.867242			NWMN_2383	hypothetical protein	0.697455	0.590135	0.671348	SA2272	-	NWMN_2383	hypothetical protein
NWMN_0566	hypothetical protein	1181	1406	597.2	629.4	825.9	274.2	1283	770	492.2	1035	961.2	274.1	1293.5	727.65	1026.5	998.1	0.562543	0.793583	0.771627			NWMN_2341	epimerase/dehydratase	1.22312	0.66191	0.67172	SA2231	-	NWMN_2341	epimerase/dehydratase
NWMN_0567	hypothetical protein	988.4	1344	377.4	600.2	775.2	177.3	929.5	165	365.1	534.4	852.8	191.9	1166.2	687.7	547.25	693.6	0.589693	0.469259	0.594752			NWMN_1249	guanosine 5'-monophosphate oxidoreductase	0.878493	0.529474	0.672021	SA1172	guaC	NWMN_1249	guanosine 5'-monophosphate oxidoreductase
NWMN_0568	hypothetical protein	1780	2123	680.9	940.5	1480	815.9	1402	1270	726.3	1794	1574	456.2	1951.5	1210.25	1336	1684	0.620164	0.684602	0.862926			NWMN_0379	xanthine permease	0.714946	0.576677	0.672038	SA0374	pbuX	pbuX	xanthine permease
NWMN_0570	hypothetical protein	2048	2411	414.2	1381	1653	885.2	1465	1226	716.6	1571	1715	594.3	2229.5	1517	1345.5	1643	0.680422	0.603499	0.736937			NWMN_2529	clumping factor B	0.395527	0.482364	0.672182	SA2423	clfB	clfB	clumping factor B
NWMN_0571	hypothetical protein	2044	2000	927.1	1284	1828	916	1404	1361	983.6	1776	1651	771	2022	1556	1382.5	1713.5	0.769535	0.683729	0.847428			NWMN_2106	hyaluronate lyase	0.841242	1.56394	0.672373	SA2003	hysA	hysA	hyaluronate lyase
NWMN_0572	aldo/keto reductase	2504	2372	1148	2064	2634	1601	1631	1538	1164	2299	1955	1032	2438	2349	1584.5	2127	0.963495	0.649918	0.872436	C		NWMN_2163	FmhB protein	0.773926	0.708163	0.672682	SA2057	fmhB	fmhB	FmhB protein
NWMN_0573	hypothetical protein	4524	5103	2137	4290	4594	2441	4060	2611	1999	4037	3690	1528	4813.5	4442	3335.5	3863.5	0.922821	0.692947	0.802638	R		NWMN_1632	hypothetical protein	0.696662	0.945373	0.673177	SA1560	-	NWMN_1632	hypothetical protein
NWMN_0574	acetyltransferase GNAT	8753	14834	2755	7043	8966	1694	6321	7077	2737	8141	8290	1296	11793.5	8004.5	6699	8215.5	0.678721	0.568025	0.696613	K		NWMN_1627	acetoin utilization protein	0.912864	0.547131	0.673199	SA1555	acuA	acuA	acetoin utilization protein
NWMN_0575	HD domain-containing protein	12065	19049	7108	6574	11743	4906	10159	11139	6657	13554	14151	4493	15557	9158.5	10649	13852.5	0.588706	0.684515	0.890435	R		NWMN_1585	histidine kinase	0.776686	1.14509	0.673609	SA1515	phoR	phoR	histidine kinase
NWMN_0576	hypothetical protein	3749	6465	3168	2669	4153	2241	4362	4049	3055	4248	5018	1975	5107	3411	4205.5	4633	0.667907	0.823478	0.907186			NWMN_0741	glyceraldehyde-3-phosphate dehydrogenase type I	0.836479	0.783101	0.674202	SA0727	gap	gapA	glyceraldehyde-3-phosphate dehydrogenase type I
NWMN_0577	alcohol dehydrogenase	4212	1614	4164	2911	2092	5533	4676	1243	4338	3656	1961	5473	2913	2501.5	2959.5	2808.5	0.858737	1.01596	0.964126	R		NWMN_1903	hypothetical protein	0.653176	0.574194	0.674414		-	NWMN_1903	hypothetical protein
NWMN_0578	hypothetical protein	12513	14468	4342	9832	10397	3664	10633	1691	5448	6174	12929	4187	13490.5	10114.5	6162	9551.5	0.74975	0.456766	0.708017	S		NWMN_1881	amidase	0.658818	0.693926	0.674662	SA1759	ami	NWMN_1881	amidase
NWMN_0579	arginyl-tRNA synthetase	6166.5	7429	2010.7	4929	5852	2150.5	5667	3276.69	2770	6926	6273.5	2188.5	6797.75	5390.5	4471.85	6599.75	0.792983	0.657842	0.970873	J		NWMN_0370	hypothetical protein	0.756338	0.651506	0.675067	SA0364	-	NWMN_0370	hypothetical protein
NWMN_0580	endonuclease III	178.6	399.5	98.58	247.4	329.4	237.1	121.4	178.9	92.94	167.1	188.2	64.05	289.05	288.4	150.15	177.65	0.997751	0.51946	0.6146	L		NWMN_2547	glycosyl transferase group 1	0.776875	0.948498	0.675306	SA2441	gftA	NWMN_2547	glycosyl transferase group 1
NWMN_0581	iron compound ABC transporter substrate-binding protein	2551	3778	695.1	2121	2278	310	2267	1687	496.5	2598	1842	377.4	3164.5	2199.5	1977	2220	0.695055	0.624743	0.701533	P		NWMN_0406	staphylococcal tandem lipoprotein	0.722709	1.14109	0.675335	SA0403	lpl7	lpl3nm	staphylococcal tandem lipoprotein
NWMN_0582	iron compound ABC transporter permease protein	3387	5570	1286	3580	4239	1318	2619	2617	1288	4032	2985	764.9	4478.5	3909.5	2618	3508.5	0.872949	0.584571	0.78341	P		NWMN_1123	hypothetical protein	0.857855	0.63887	0.675335	SA1056	-	NWMN_1123	hypothetical protein
NWMN_0583	haloacid dehalogenase-like hydrolase	4077	6211	2752	3784	4768	2539	4214	3522	2680	5584	4247	1999	5144	4276	3868	4915.5	0.83126	0.751944	0.955579	R		NWMN_2337	amino acid ABC transporter-like protein	0.779887	0.480205	0.67599	SA2226	cycA	NWMN_2337	amino acid ABC transporter-like protein
NWMN_0584	hydrolase	3972	4859	2366	3718	4195	2089	3545	3010	2320	4642	3506	1584	4415.5	3956.5	3277.5	4074	0.896048	0.742272	0.922659	R		NWMN_2184	hypothetical protein	0.947579	0.445055	0.676121		-	NWMN_2184	hypothetical protein
NWMN_0585	hypothetical protein	8496	9918	13757	6444	6855	9496	17690	10762	17640	12673	11643	13610	9207	6649.5	14226	12158	0.722222	1.54513	1.32052			NWMN_1080	hypothetical protein	0.744865	0.941469	0.676152	SA1014	arcD	NWMN_1080	hypothetical protein
NWMN_0586	hypothetical protein	10793.5	10743.5	7780	4973	7131.5	7663	8718	6199.5	8713.5	7039.5	6116.5	6638	10768.5	6052.25	7458.75	6578	0.562033	0.692645	0.610856			NWMN_1144	SMC domain-containing protein	0.718089	0.519933	0.676189	SA1077	smc	smc	SMC domain-containing protein
NWMN_0587	alpha/beta fold family hydrolase	16283	6419	9421	9392	8589	15225	15182	4345	9282	7513	4613	9019	11351	8990.5	9763.5	6063	0.792045	0.860144	0.534138	R		NWMN_0520	hypothetical protein	0.872458	0.589452	0.676491	SA0516	tadA	NWMN_0520	hypothetical protein
NWMN_0588	staphylococcal accessory regulator A	2312	2069	2590	2316	1959	1994	3836	1789	2739	1914	1666	2168	2190.5	2137.5	2812.5	1790	0.975805	1.28395	0.817165	K		NWMN_1343	hypothetical protein	0.715814	0.55702	0.677032	SA1266	rnhA	NWMN_1343	hypothetical protein
NWMN_0590	hypothetical protein	1447	2248	331.2	1031	1685	1191	1000	949.1	717.6	547.8	1205	582.8	1847.5	1358	974.55	876.4	0.735047	0.527497	0.474371	S		NWMN_2500	amino acid permease	0.909215	0.605037	0.677275	SA2396	-	NWMN_2500	amino acid permease
NWMN_0591	hypothetical protein	279.55	371.3	180.05	191.65	250.95	190.65	252.65	251.9	191.85	228.15	193.4	130.98	325.425	221.3	252.275	210.775	0.680034	0.775217	0.647691			NWMN_1222	hypothetical protein	0.863216	0.360826	0.6773	SA1153	-	NWMN_1222	hypothetical protein
NWMN_0592	integrase/recombinase	7596	4296	4613	2322	3451	4496	9130	3412	3687	3656	3132	3948	5946	2886.5	6271	3394	0.485452	1.05466	0.570804	L		NWMN_0862	oligopeptide ABC transporter ATP-binding protein	0.797557	0.599793	0.677557	SA0851	dppD	appF	oligopeptide ABC transporter ATP-binding protein
NWMN_0593	monovalent cation/H+ antiporter subunit A	3491	5174	3741	2668	3014	3939	5140	3958	3042	4342	2370	3891	4332.5	2841	4549	3356	0.655741	1.04997	0.774611	C		NWMN_0660	hypothetical protein	0.503712	0.936591	0.678008	SA0646	phrB	NWMN_0660	hypothetical protein
NWMN_0594	monovalent cation/H+ antiporter subunit B	4248	6866	3925	3676	3279	4385	4364	4971	3328	5404	3091	4631	5557	3477.5	4667.5	4247.5	0.625787	0.839932	0.764351	P		NWMN_1911	hypothetical protein	0.377494	0.459936	0.678056		recT	NWMN_1911	hypothetical protein
NWMN_0595	monovalent cation/H+ antiporter subunit C	5209	6978	4366	3922	3281	5042	4655	5136	3683	6107	3147	4977	6093.5	3601.5	4895.5	4627	0.59104	0.803397	0.759334	P		NWMN_0887	diacylglycerol glucosyltransferase	0.760502	0.623657	0.67934	SA0875	ypfP	murG	diacylglycerol glucosyltransferase
NWMN_0596	CPA3 family monovalent cation (K+ or Na+):proton (H+) antiporter-3, MnhD subunit (mnhD1)	4481	6146	2975	3081	2720	3600	3790	5223	2877	5593	2834	3862	5313.5	2900.5	4506.5	4213.5	0.545874	0.848123	0.79298	C		NWMN_1749	amino acid ABC transporter ATP-binding protein	0.536344	0.877218	0.679358	SA1674	glnQ	NWMN_1749	amino acid ABC transporter ATP-binding protein
NWMN_0597	monovalent cation/H+ antiporter subunit E	4728	7392	3053	2716	3239	4231	3778	5448	3036	5014	3018	3802	6060	2977.5	4613	4016	0.491337	0.761221	0.662706	P		NWMN_0347	hypothetical protein	0.511628	0.650586	0.679697	SA0343	-	NWMN_0347	hypothetical protein
NWMN_0598	monovalent cation/H+ antiporter subunit F	4864	7439	3203	2021	3127	4291	3839	5936	3227	5563	3223	3748	6151.5	2574	4887.5	4393	0.418435	0.794522	0.714135	P		NWMN_0699	ribonucleotide reductase stimulatory protein	0.838065	0.683491	0.679722	SA0685	nrdI	nrdI	ribonucleotide reductase stimulatory protein
NWMN_0599	monovalent cation/H+ antiporter subunit G	1146.8	1643	700.15	589.5	721.45	707.35	1017.4	1312.65	624.25	1226.25	770.4	821.7	1394.9	655.475	1165.03	998.325	0.469908	0.835203	0.715696	P		NWMN_2518	sulfite reductase (NADPH) flavoprotein alpha-component	0.584519	0.536579	0.68015	SA2413	cysJ	NWMN_2518	sulfite reductase (NADPH) flavoprotein alpha-component
NWMN_0600	Na+/H+ antiporter	5904	7775	1189	2921	4892	3197	5167	1042	3619	151.9	1958	3117	6839.5	3906.5	3104.5	1054.95	0.571167	0.453907	0.154244	P		NWMN_0561	hypothetical protein	0.542804	0.704593	0.680478		-	NWMN_0561	hypothetical protein
NWMN_0601	iron repressed lipoprotein MntC (ABC transporter substrate-binding protein)	65177.4	65172.7	65162.1	65180.3	65180.4	60895.6	65155.1	65181.1	64361.7	65171.9	65181.3	54408.3	65175.1	65180.4	65168.1	65176.6	1.00008	0.999894	1.00002	P		NWMN_1298	phosphate ABC transporter permease protein	1.18174	0.620719	0.680504	SA1219	pstA	NWMN_1298	phosphate ABC transporter permease protein
NWMN_0602	iron (chelated) ABC transporter permease protein	65176	65171	65164	65182	65181	65178	65165	65183	65180	65171	65182	65057	65173.5	65181.5	65174	65176.5	1.00012	1.00001	1.00005	P		NWMN_2000	hypothetical protein	0.778819	0.671853	0.680774		-	NWMN_2000	hypothetical protein
NWMN_0603	cation ABC transporter ATP-binding protein MntA	65177.9	65172.6	65162.6	65180.4	65181.7	65145.1	65161.6	65181.7	65180.6	65172.3	65182.1	59513.1	65175.2	65181.1	65171.6	65177.2	1.00009	0.999945	1.00003	P		NWMN_1616	aminotransferase class V	0.745503	0.587851	0.681435	SA1544	-	NWMN_1616	aminotransferase class V
NWMN_0604	iron dependent repressor	6356	9733	3628	5607	8215	4283	5397	3537	3718	256	6822	2923	8044.5	6911	4467	3539	0.859096	0.555286	0.439928	K		NWMN_2402	gluconate kinase	0.863422	0.491065	0.681608	SA2294	gntK	gntK	gluconate kinase
NWMN_0605	hypothetical protein	401.4	475	220.7	520.5	592.5	231.7	412.5	327.5	212.5	444.4	361.6	132.1	438.2	556.5	370	403	1.26997	0.844363	0.919671			NWMN_0057	lipoprotein SirC	0.654998	0.555042	0.681662	SA0109	sirC	sirC	lipoprotein SirC
NWMN_0606	teichoic acid biosynthesis protein	2410.43	3714.71	958	2068.43	2361.29	601.986	2512.86	1803.14	1003.49	2593.86	1908.43	420.814	3062.57	2214.86	2158	2251.14	0.723202	0.704637	0.73505	M		NWMN_0418	NADH dehydrogenase subunit 5	0.819485	0.529549	0.681685	SA0411	ndhF	ndhF	NADH dehydrogenase subunit 5
NWMN_0607	teichoic acids export protein ATP-binding subunit	9815.71	11282.3	3275.43	7674	9453.86	4316.57	7252.29	5936.29	3905	10053.7	7696.71	3045.57	10549	8563.93	6594.29	8875.21	0.811824	0.62511	0.841332	G		NWMN_2169	molybdopterin-guanine dinucleotide biosynthesis protein A	0.645049	0.709839	0.681827	SA2064	mobA	mobA	molybdopterin-guanine dinucleotide biosynthesis protein A
NWMN_0608	teichoic acid biosynthesis protein	1632	1908	1118	1591	1940	888.8	1996	1501	1027	2034	1290	618.5	1770	1765.5	1748.5	1662	0.997458	0.987853	0.938983	G		NWMN_0626	acetyltransferase	0.613416	0.622999	0.681829	SA0612	-	NWMN_0626	acetyltransferase
NWMN_0609	tagB protein	3732	5645	1173	2811	3877	2921	2815	1436	2882	2710	3174	2607	4688.5	3344	2125.5	2942	0.713235	0.453343	0.627493	M		NWMN_0129	ornithine aminotransferase	0.657316	0.485377	0.682286	SA0179	rocD1	argD	ornithine aminotransferase
NWMN_0610	tagX protein	7044	7974	3551	4389	5404	3036	5465	4137	3707	5341	4990	2763	7509	4896.5	4801	5165.5	0.652084	0.639366	0.687908	M		NWMN_0096	capsular polysaccharide biosynthesis protein CapB	1.13688	1.13473	0.682322	SA0145	capB	capB	capsular polysaccharide biosynthesis protein CapB
NWMN_0611	glycerol-3-phosphate cytidylyltransferase	3135	3733	1982	2155	2194	1513	3015	2172	1912	3057	2697	1429	3434	2174.5	2593.5	2877	0.633227	0.755242	0.837798	M		NWMN_0954	TrkA potassium uptake	0.78368	0.567882	0.682874	SA0939	trkA	NWMN_0954	TrkA potassium uptake
NWMN_0612	penicillin-binding protein 4	1566.26	1790.57	617.686	1279.17	1713	1082.06	1148.63	1047.31	660.729	1548.29	1332.71	535.471	1678.41	1496.09	1097.97	1440.5	0.891369	0.654172	0.858251	M		NWMN_0003	recombination protein F	0.813746	0.588725	0.683747	SA0004	recF	recF	recombination protein F
NWMN_0613	ABC transporter ATP-binding protein	23343	31102	23174	12731	18005	17938	30684	25148	24926	29414	29197	25902	27222.5	15368	27916	29305.5	0.564533	1.02548	1.07652	V		NWMN_1418	peptidase T	0.711017	0.596479	0.683918	SA1343	-	NWMN_1418	peptidase T
NWMN_0614	nucleoside permease NupC	2687	3625	1555	1587	1982	1281	2976	1745	1541	3465	2358	1060	3156	1784.5	2360.5	2911.5	0.565431	0.74794	0.922529	F		NWMN_1154	ribonuclease HII	0.805624	0.528591	0.684112	SA1087	rnhB	rnhB	ribonuclease HII
NWMN_0615	hypothetical protein	7114	7254	3538	7668	7474	4713	5690	5322	3070	8066	6098	3105	7184	7571	5506	7082	1.05387	0.766425	0.985802	S		NWMN_1897	hypothetical protein	0.976292	0.570119	0.684411		-	NWMN_1897	hypothetical protein
NWMN_0616	iron compound ABC transporter ATP-binding protein	2371	3980	1664	1308	1871	1201	2573	2016	1497	2796	2350	1355	3175.5	1589.5	2294.5	2573	0.500551	0.722563	0.810266	P		NWMN_1902	hypothetical protein	0.773997	0.787372	0.6845		-	NWMN_1902	hypothetical protein
NWMN_0617	ferrichrome transport permease fhuB	557.3	1118	483.2	377.1	659.1	447.7	556.1	615	520.6	586.1	939.6	512.7	837.65	518.1	585.55	762.85	0.618516	0.699039	0.910703	P		NWMN_0058	lipoprotein SirB	0.620366	0.696323	0.684672	SA0110	sirB	sirB	lipoprotein SirB
NWMN_0618	ferrichrome ABC transporter (permease)	784.229	1486.57	710.786	645.786	1122.14	730.671	682.857	1103.34	668.743	982.171	1201.71	676.471	1135.4	883.964	893.1	1091.94	0.778549	0.786595	0.961725	P		NWMN_1994	membrane protein oxaA	0.940085	0.679298	0.684753	SA1893	oxaI	oxaA	membrane protein oxaA
NWMN_0619	dihydroxyacetone kinase	10775.7	9651.57	3775.43	9665.43	13173.4	5486.57	5683.86	7114.71	3025	8078.29	9431.86	3763.57	10213.6	11419.4	6399.29	8755.07	1.11806	0.626543	0.857194	G		NWMN_2271	acetyltransferase GNAT	1.03251	0.590172	0.684833	SA2159	paiA	NWMN_2271	acetyltransferase GNAT
NWMN_0620	DAK2 domain-containing protein	10909	10459	5199	9540	13458	6988	6517	7486	4814	8445	9715	5017	10684	11499	7001.5	9080	1.07628	0.655326	0.849869	G		NWMN_1626	acetyl-CoA synthetase	1.01681	0.57287	0.685417	SA1554	acsA	acs	acetyl-CoA synthetase
NWMN_0621	hypothetical protein	6825	6609	3592	6091	8020	3968	4534	5291	3163	6046	7658	3701	6717	7055.5	4912.5	6852	1.05039	0.731353	1.0201	S		NWMN_0171	acetyl-CoA/acetoacetyl-CoA transferase	0.86096	0.410431	0.685792	SA0227	fadX	NWMN_0171	acetyl-CoA/acetoacetyl-CoA transferase
NWMN_0622	hypothetical protein	4035	6234	1702	3918	4512	2294	3676	2970	1824	4027	4966	1670	5134.5	4215	3323	4496.5	0.820917	0.647191	0.875743			NWMN_0771	OsmC-like protein	1.09238	1.27466	0.686226	SA0755	osmC	NWMN_0771	OsmC-like protein
NWMN_0623	hypothetical protein	2109	3053	1297	2248	3955	1703	2124	2175	1280	2272	2341	982.8	2581	3101.5	2149.5	2306.5	1.20167	0.832817	0.893646	S		NWMN_0486	ATP:guanido phosphotransferase	0.707932	0.528944	0.686232	SA0482	-	NWMN_0486	ATP:guanido phosphotransferase
NWMN_0624	lipase/esterase LipA	1305	1378	260.2	1270	1616	286.9	767.1	755.8	268.9	952.8	781.5	167	1341.5	1443	761.45	867.15	1.07566	0.567611	0.646403	I		NWMN_0251	ABC transporter ATP-binding protein	0.645449	1.11521	0.686787	SA0297	-	NWMN_0251	ABC transporter ATP-binding protein
NWMN_0625	hypothetical protein	1326	1947	693.8	722.9	1309	679.9	1198	904.7	619.5	1229	960.3	417.9	1636.5	1015.95	1051.35	1094.65	0.620807	0.642438	0.668897			NWMN_1904	phage dUTP pyrophosphatase	0.651932	0.62771	0.686993	NA		NWMN_1904	phage dUTP pyrophosphatase
NWMN_0626	acetyltransferase	3214	5030	1031	2168	2889	969.4	2456	2680	1128	3064	2557	659.6	4122	2528.5	2568	2810.5	0.613416	0.622999	0.681829	K		NWMN_2061	methicillin resistance determinant FmtB protein	0.410674	0.440568	0.687542	SA1964	fmtB	fmtB	methicillin resistance determinant FmtB protein
NWMN_0627	hypothetical protein	3530	4899	1708	2829	2898	1621	2651	2693	1924	5017	3588	1403	4214.5	2863.5	2672	4302.5	0.67944	0.634002	1.02088	M		NWMN_0895	competence transcription factor ComK-like protein	0.122642	0.539563	0.687635	SA0882	comK	comK	competence transcription factor ComK-like protein
NWMN_0628	hypothetical protein	2502	3141	1322	1814	2288	1221	2242	1701	1399	2954	2146	998	2821.5	2051	1971.5	2550	0.726918	0.698742	0.903775	T		NWMN_0610	tagX protein	0.652084	0.639366	0.687908	SA0596	tagX	tagX	tagX protein
NWMN_0629	sensor histidine kinase	1828	2092	993.8	1171	1506	951.6	1431	1257	1052	1997	1400	809.2	1960	1338.5	1344	1698.5	0.682908	0.685714	0.866582	T		NWMN_1948	sucrose-6-phosphate hydrolase	0.708265	0.533437	0.688038	SA1846	scrB	scrB	sucrose-6-phosphate hydrolase
NWMN_0630	ABC transporter ATP-binding protein	4002	7349	1967	4340	6712	2959	1377	4520	1893	2711	4016	1162	5675.5	5526	2948.5	3363.5	0.973659	0.519514	0.592635	V		NWMN_2202	hypothetical protein	0.873095	0.848784	0.688416	SA2096	-	NWMN_2202	hypothetical protein
NWMN_0631	ABC transporter permease	5086	8478	2985	3930	8768	3507	1424	5002	1935	2687	4130	1187	6782	6349	3213	3408.5	0.936155	0.473754	0.50258	V		NWMN_0485	UvrB/UvrC motif-containing protein	0.769411	0.521299	0.689627	SA0481	cstR	NWMN_0485	UvrB/UvrC motif-containing protein
NWMN_0632	hypothetical protein	4868	4992	3291	3583	4684	4280	4513	2847	3447	4368	3309	2557	4930	4133.5	3680	3838.5	0.838438	0.74645	0.7786	P		NWMN_0254	hypothetical protein	1.05291	0.467072	0.690108	SA0301	-	NWMN_0254	hypothetical protein
NWMN_0633	phosphate transporter	3670	3761	2293	3576	4171	2639	3734	2408	2113	3633	2714	1846	3715.5	3873.5	3071	3173.5	1.04252	0.826537	0.854125	P		NWMN_1119	fibronectin-binding protein A-related	0.936202	0.65888	0.690437	SA1051	fbpA	NWMN_1119	fibronectin-binding protein A-related
NWMN_0634	secretory antigen SsaA-like protein	7058	7577	2979	11030	11150	4593	5634	4262	1960	7002	3660	1214	7317.5	11090	4948	5331	1.51554	0.676187	0.728528	M		NWMN_1426	arginine repressor	0.704371	0.594167	0.690636	SA1351	ahrC	ahrC	arginine repressor
NWMN_0635	membrane protein interacting with FtsH	2595	2982	1457	1962	2502	1281	1784	2324	1528	2523	2477	1006	2788.5	2232	2054	2500	0.80043	0.736597	0.896539	R		NWMN_1961	acetolactate synthase large subunit	0.664292	0.507715	0.690683	SA1859	ilvB	ilvB	acetolactate synthase large subunit
NWMN_0636	AraC family transcription regulator	720.514	934.143	207.8	427.257	586.8	116.997	547.386	313.543	232.009	627.6	457.429	117.714	827.329	507.029	430.464	542.514	0.61285	0.520306	0.655742	K		NWMN_1537	adenine phosphoribosyltransferase	0.810098	0.765478	0.690725	SA1461	apt	apt	adenine phosphoribosyltransferase
NWMN_0637	hypothetical protein	132.1	158.2	47.16	127.8	152.3	45.62	124.1	89.99	40.45	422.9	103.4	25.16	145.15	140.05	107.045	263.15	0.964864	0.737478	1.81295	K		NWMN_0948	hypothetical protein	0.619176	1.08502	0.690771	SA0933	-	NWMN_0948	hypothetical protein
NWMN_0638	hypothetical protein	3952	6865	1906	5138	5143	2660	4958	3940	2233	7160	5384	2006	5408.5	5140.5	4449	6272	0.950448	0.822594	1.15966	S		NWMN_2424	ABC transporter ATP-binding protein	0.822239	0.534569	0.691119	SA2314	-	NWMN_2424	ABC transporter ATP-binding protein
NWMN_0639	hypothetical protein	1268.33	1864.67	764.533	1369.67	1784.33	985.833	1670.67	1294	705.167	2056.33	1556.67	565.7	1566.5	1577	1482.33	1806.5	1.0067	0.946271	1.15321	S		NWMN_0046	AraC family transcription regulator	0.836713	0.553763	0.69125	SA0097	-	NWMN_0046	AraC family transcription regulator
NWMN_0640	hypothetical protein	12694	21925	7562	12722	15885	9873	10024	10285	7163	14647	12812	5460	17309.5	14303.5	10154.5	13729.5	0.826338	0.586643	0.793177	S		NWMN_1672	translaldolase	0.799622	0.871689	0.691262	SA1599	tal	NWMN_1672	translaldolase
NWMN_0641	LysR family transcriptional regulator	7846	8715	3697	4716	5252	5255	6112	3688	4162	7821	5662	3864	8280.5	4984	4900	6741.5	0.601896	0.591752	0.814142	K		NWMN_0175	globin domain-containing protein	1.22153	1.0237	0.691465	SA0231	hmp	NWMN_0175	globin domain-containing protein
NWMN_0642	major facilitator super superfamily	3048	2522	1225	1899	1960	1181	2291	1422	1125	2915	1891	1289	2785	1929.5	1856.5	2403	0.692819	0.666607	0.862837	G		NWMN_2460	aminotransferase class I	0.859119	0.551554	0.691536	SA2347	ywfG	NWMN_2460	aminotransferase class I
NWMN_0643	hypothetical protein	1190	1233	652.8	694.7	820.7	1039	1131	659.9	586.8	1157	810.3	710.1	1211.5	757.7	895.45	983.65	0.625423	0.739125	0.811927	S		NWMN_1623	transglycosylase domain-containing protein	0.724022	0.674036	0.691562	SA1551	sgtA	NWMN_1623	transglycosylase domain-containing protein
NWMN_0644	hypothetical protein	3102	2983	793.7	2426	2507	837.3	1990	1768	777.4	2086	1517	345.7	3042.5	2466.5	1879	1801.5	0.810682	0.617584	0.592112			NWMN_0714	hypothetical protein	0.872801	0.585904	0.691719	SA0700	-	NWMN_0714	hypothetical protein
NWMN_0645	hypothetical protein	1138	487.1	378.6	477.2	463.8	520	717.1	297.8	469.2	411.3	312.4	263.2	812.55	470.5	507.45	361.85	0.579041	0.624515	0.445326	K		NWMN_1900	hypothetical protein	0.704913	0.451628	0.692332		-	NWMN_1900	hypothetical protein
NWMN_0646	hypothetical protein	3680	3239	1267	2819	2698	1717	2406	1675	1580	3541	1901	869.4	3459.5	2758.5	2040.5	2721	0.79737	0.589825	0.78653			NWMN_0729	prolipoprotein diacylglyceryl transferase	0.813979	0.552552	0.69291	SA0716	lgt	lgt	prolipoprotein diacylglyceryl transferase
NWMN_0647	hypothetical protein	5891	3814	3647	2298	3186	3212	6948	2533	4801	3117	3112	3052	4852.5	2742	4740.5	3114.5	0.56507	0.976919	0.641834			NWMN_2598	ABC transporter ATP-binding protein	0.837741	0.728597	0.692963	SA2492	vraD	vraD	ABC transporter ATP-binding protein
NWMN_0648	acetyltransferase	2161	1599	255.1	445.3	1042	631.1	1867	296.5	703.4	678.8	604.3	478.9	1880	743.65	1081.75	641.55	0.395559	0.575399	0.34125	J		NWMN_0074	glycosyl transferase group 1	0.376956	0.653488	0.693161	SA0125	cap8H	NWMN_0074	glycosyl transferase group 1
NWMN_0649	hypothetical protein	5476	2003	2051	1338	1383	2283	7579	1304	2309	2235	1302	2175	3739.5	1360.5	4441.5	1768.5	0.363819	1.18773	0.472924	R		NWMN_2335	hypothetical protein	0.653139	0.581595	0.693296	SA2224	-	NWMN_2335	hypothetical protein
NWMN_0650	hypothetical protein	10790.5	1987.5	4090	1627	1695.5	3233.5	11605.5	1802.5	5997.5	2359.5	1678.5	3888.5	6389	1661.25	6704	2019	0.260017	1.0493	0.316012	S		NWMN_2176	molybdopterin biosynthesis MoeB	0.901504	0.570438	0.69431	SA2071	moeB	moeB	molybdopterin biosynthesis MoeB
NWMN_0651	hypothetical protein	23552	10981	22850	5646	9024	15040	25719	1805	23524	10547	11555	14733	17266.5	7335	13762	11051	0.424811	0.797035	0.640025			NWMN_0301	hypothetical protein	1.03265	0.772647	0.694358		-	NWMN_0301	hypothetical protein
NWMN_0652	undecaprenyl pyrophosphate phosphatase	2401	2371.14	1215.94	2704.71	3114.57	1627.71	2924.29	1728.43	1276.51	2732.43	2172.14	1136.43	2386.07	2909.64	2326.36	2452.29	1.21943	0.974974	1.02775	V		NWMN_2577	ATP phosphoribosyltransferase catalytic subunit	0.634995	0.529705	0.694426	SA2471	hisG	hisG	ATP phosphoribosyltransferase catalytic subunit
NWMN_0653	ABC transporter ATP-binding MsbA	3365	3886	2122	2348	2742	2584	2860	2369	2075	3424	2749	1756	3625.5	2545	2614.5	3086.5	0.701972	0.721142	0.851331	C		NWMN_0529	GTP cyclohydrolase	0.566415	0.706263	0.694744	SA0524	folE2	NWMN_0529	GTP cyclohydrolase
NWMN_0654	ABC transporter ATP-binding MsbA	2499	2294	1650	1691	2556	1995	2163	1785	1688	3060	2115	1423	2396.5	2123.5	1974	2587.5	0.886084	0.823701	1.0797	C		NWMN_2327	ABC transporter ATP-binding protein	0.656819	0.756897	0.694842	SA2216	-	NWMN_2327	ABC transporter ATP-binding protein
NWMN_0655	MarR family regulatory protein	1818	2223	3659	1687	2720	2422	4829	3169	3398	1820	1715	1814	2020.5	2203.5	3999	1767.5	1.09057	1.97921	0.874783	K		NWMN_1112	dihydroorotase	1.06471	0.482107	0.695012	SA1044	pyrC	pyrC	dihydroorotase
NWMN_0656	cobalamin synthesis protein P47K	2026	1474	1035	1018	1248	1031	1737	944.5	1218	1668	1112	804.3	1750	1133	1340.75	1390	0.647429	0.766143	0.794286	R		NWMN_2170	molybdopterin converting factor subunit 1	0.736918	0.776882	0.695161	SA2065	moaD	moaD	molybdopterin converting factor subunit 1
NWMN_0657	oxidoreductase	5103	5100	1939	3976	4582	1741	4661	2935	1756	4966	3605	1306	5101.5	4279	3798	4285.5	0.838773	0.744487	0.840047	R		NWMN_2199	secretory antigen SsaA-like protein	1.8326	0.47686	0.695514	SA2093	ssaA	NWMN_2199	secretory antigen SsaA-like protein
NWMN_0658	hypothetical protein	3443	3847	1448	2466	2683	1592	2952	780.6	1408	73.99	2596	1105	3645	2574.5	1866.3	1334.99	0.70631	0.512016	0.366254			NWMN_2582	cobalt ABC transporter ATP-binding protein	0.622642	0.695185	0.695944	SA2476	mtsB	NWMN_2582	cobalt ABC transporter ATP-binding protein
NWMN_0659	anion transporter	3640	2869	1840	2113	2724	2817	2461	2044	2027	2698	2334	2360	3254.5	2418.5	2252.5	2516	0.743125	0.692119	0.773083	P		NWMN_0722	preprotein translocase subunit SecA	0.968059	0.642675	0.69639	SA0708	secA	secA	preprotein translocase subunit SecA
NWMN_0660	hypothetical protein	4203	2263	2036	1585	1672	2244	4508	1548	1983	2602	1782	2389	3233	1628.5	3028	2192	0.503712	0.936591	0.678008	L		NWMN_0574	acetyltransferase GNAT	0.678721	0.568025	0.696613	SA0559	-	NWMN_0574	acetyltransferase GNAT
NWMN_0661	hypothetical protein	635.5	692.6	332.7	429.7	661.6	406.4	486.2	412.4	366.8	782.1	467.1	247.5	664.05	545.65	449.3	624.6	0.8217	0.676606	0.940592			NWMN_1183	polynucleotide phosphorylase/polyadenylase	0.930495	0.625151	0.697228	SA1117	pnpA	pnpA	polynucleotide phosphorylase/polyadenylase
NWMN_0662	hypothetical protein	2518.14	3711.71	1515.29	2084	3540.86	1764.86	2424.57	2306.57	1544.86	2399.29	2187.71	825.871	3114.93	2812.43	2365.57	2293.5	0.902887	0.75943	0.736293	S		NWMN_0403	hypothetical protein	0.895907	0.567319	0.697361	SA0396	lpl1	lpl1nm	hypothetical protein
NWMN_0663	hypothetical protein	2006.86	2832.14	678.771	1498.86	2273.71	1110.86	1978.86	1470.29	1086.83	1193.06	1630.29	744.271	2419.5	1886.29	1724.57	1411.67	0.779618	0.71278	0.583456	R		NWMN_0289	hypothetical protein	0.789858	0.861919	0.697429	NA		NWMN_0289	hypothetical protein
NWMN_0664	quinolone resistance norA protein	11437	9928	8042	8178	9669	11542	9943	7073	7993	8598	7155	6936	10682.5	8923.5	8508	7876.5	0.835338	0.796443	0.737327	G		NWMN_1638	glutamyl-aminopeptidase	0.282745	0.695953	0.69749	SA1566	pepA1	NWMN_1638	glutamyl-aminopeptidase
NWMN_0665	hypothetical protein	3885	4937.67	1568.33	4359.67	5135.33	1832.33	3693.33	3008	1199	4792.33	2562.33	744.133	4411.33	4747.5	3350.67	3677.33	1.07621	0.759559	0.83361			NWMN_2581	cobalt transport	0.688741	0.703558	0.697681	SA2475	mtsC	NWMN_2581	cobalt transport
NWMN_0666	ebsC protein	2663.5	2383.5	1206.9	1859.5	2367.5	1503.5	1704	1200.3	1183.15	2219.4	1951	1132.9	2523.5	2113.5	1452.15	2085.2	0.837527	0.575451	0.826313	S		NWMN_1965	isopropylmalate isomerase large subunit	0.533745	0.563655	0.69782	SA1864	leuC	leuC	isopropylmalate isomerase large subunit
NWMN_0667	fructose operon transcriptional repressor	3889.14	3073.43	1439.29	2430.43	3835	2274	1866.57	2259.71	1635.29	2964.86	2905.86	1841.86	3481.29	3132.71	2063.14	2935.36	0.899873	0.592638	0.843182	K		NWMN_1066	fibrinogen-binding protein-related	0.408926	0.679131	0.698103	SA1000	efb	NWMN_1066	fibrinogen-binding protein-related
NWMN_0668	fructose 1-phosphate kinase	4744	4105	1885	2842	4646	3413	2729	2779	2211	3453	3519	2632	4424.5	3744	2754	3486	0.846197	0.622443	0.787886	G		NWMN_0823	hypothetical protein	0.898353	0.547818	0.698571	SA0814	kapB	NWMN_0823	hypothetical protein
NWMN_0669	fructose specific permease	3756	3045	1999	2461	3869	3098	2667	2588	2196	3283	3445	2535	3400.5	3165	2627.5	3364	0.930745	0.77268	0.989266	G		NWMN_1223	hypothetical protein	0.961938	0.868749	0.698707		-	NWMN_1223	hypothetical protein
NWMN_0670	N-acetylglucosamine-6-phosphate deacetylase	1976	2532	642.1	2061	2374	653	2035	1276	453.8	1226	1707	402.8	2254	2217.5	1655.5	1466.5	0.983807	0.734472	0.650621	G		NWMN_2167	hypothetical protein	0.391487	0.571807	0.698756	SA2062	sarV	sarV	hypothetical protein
NWMN_0671	hemolysin	5943	6388	3144	4513	5770	3675	4899	5159	2893	6129	4468	2169	6165.5	5141.5	5029	5298.5	0.833915	0.815668	0.859379	R		NWMN_2303	formate/nitrite transporter	0.978779	0.774042	0.699021	SA2191	nirC	NWMN_2303	formate/nitrite transporter
NWMN_0672	aldo/keto reductase	26234	20282	20552	11361	12060	21383	27982	11004	21733	13837	14564	19432	23258	11710.5	19493	14200.5	0.503504	0.83812	0.610564	R		NWMN_1283	N-(5'phosphoribosyl)anthranilate isomerase	0.629778	0.620151	0.699515	SA1203	trpF	trpF	N-(5'phosphoribosyl)anthranilate isomerase
NWMN_0673	glycosyl transferase group 2	11047	8808	9607	4714	5137	9049	15120	4561	8700	6319	5651	7039	9927.5	4925.5	9840.5	5985	0.496147	0.991236	0.602871	M		NWMN_2580	hypothetical protein	0.695736	0.668412	0.699519	SA2474	-	NWMN_2580	hypothetical protein
NWMN_0674	sensor histidine kinase SaeS	65177	65170	65168	29381	53757	33153	63473	65180	65181	65169	65184	65181	65173.5	41569	64326.5	65176.5	0.637821	0.987004	1.00005	T		NWMN_2060	mannitol-1-phosphate 5-dehydrogenase	0.825834	0.96874	0.699805	SA1963	mtlD	mtlD	mannitol-1-phosphate 5-dehydrogenase
NWMN_0675	response regulator	55627	65168	32668	13960	25790	15187	35282	51997	40506	59163	65184	51385	60397.5	19875	43639.5	62173.5	0.32907	0.722538	1.02941	T		NWMN_2053	SAP domain-containing protein	0.547005	0.613409	0.700384		-	NWMN_2053	SAP domain-containing protein
NWMN_0676	hypothetical protein	59854	65170	39454	18887	33518	19268	39119	59121	43416	65001	65188	55289	62512	26202.5	49120	65094.5	0.41916	0.785769	1.04131	S		NWMN_1764	hypothetical protein	0.776608	0.542923	0.700518	SA1689	-	NWMN_1764	hypothetical protein
NWMN_0677	hypothetical protein	16429	22370	11774	7254	8961	3338	20788	25644	15712	26535	32065	17044	19399.5	8107.5	23216	29300	0.417923	1.19673	1.51035			NWMN_0169	glutaryl-CoA dehydrogenase FadD-like protein	0.755798	0.410283	0.700762	SA0225	fadD	fadD	glutaryl-CoA dehydrogenase FadD-like protein
NWMN_0678	hypothetical protein	3432	2189	1710	1885	2373	2616	3239	1651	1766	2067	1452	1684	2810.5	2129	2445	1759.5	0.757516	0.869952	0.626045			NWMN_2173	molybdopterin biosynthesis protein moeA	0.824817	0.626207	0.701289	SA2068	moeA	moeA	molybdopterin biosynthesis protein moeA
NWMN_0679	radical activating enzyme	6748	2893	3854	2924	2959	6261	5498	2142	3430	3291	2701	5019	4820.5	2941.5	3820	2996	0.610206	0.792449	0.621512	O		NWMN_0581	iron compound ABC transporter substrate-binding protein	0.695055	0.624743	0.701533	SA0566	btuF	NWMN_0581	iron compound ABC transporter substrate-binding protein
NWMN_0680	6-pyruvoyl tetrahydropterin synthase (queuosine biosynthesis)	4255	1561	2350	1428	1654	4064	2906	1225	2554	1680	1433	3051	2908	1541	2065.5	1556.5	0.529917	0.710282	0.535248	H		NWMN_0315	NADH-dependent flavin oxidoreductase Oye	0.869952	0.655487	0.701802	SA0311	yqiG	NWMN_0315	NADH-dependent flavin oxidoreductase Oye
NWMN_0681	7-cyano-7-deazaguanine synthase (queuosine biosynthesis)	4165	1476	676.4	1416	1645	3430	2742	131.3	1991	17.55	237.7	2104	2820.5	1530.5	1436.65	127.625	0.542634	0.50936	0.0452491	R		NWMN_0252	perfringolysin O regulator protein	0.843266	0.507688	0.701928	SA0298	pfoR	NWMN_0252	perfringolysin O regulator protein
NWMN_0682	para-aminobenzoate synthase glutamine amidotransferase component II	5147	4911	1399	4168	3943	1555	4180	3091	1454	5915	3681	1251	5029	4055.5	3635.5	4798	0.806423	0.722907	0.954066	E		NWMN_0100	capsular polysaccharide biosynthesis protein CapF	1.15817	0.834333	0.702027	SA0149	capF	capF	capsular polysaccharide biosynthesis protein CapF
NWMN_0683	anthranilate/para-aminobenzoate synthase component I	16709	16463	8324	11552	11818	8664	12221	9706	6398	19256	14380	6089	16586	11685	10963.5	16818	0.70451	0.661009	1.01399	E		NWMN_0935	phosphoribosylaminoimidazole-succinocarboxamide synthase	1.05418	0.623656	0.702233	SA0918	purC	purC	phosphoribosylaminoimidazole-succinocarboxamide synthase
NWMN_0684	chorismate binding enzyme	18936	19515	11287	14376	15842	10602	12992	12323	9178	22829	17038	8346	19225.5	15109	12657.5	19933.5	0.785883	0.65837	1.03683	E		NWMN_2584	hypothetical protein	0.696418	0.557749	0.702565	SA2478	-	NWMN_2584	hypothetical protein
NWMN_0685	hypothetical protein	7595	9243	4759	6543	6440	4409	6040	5833	4741	10805	8345	4406	8419	6491.5	5936.5	9575	0.771054	0.705131	1.13731	E		NWMN_1610	aminotransferase class V	0.886447	0.694675	0.702659	SA1538	nifZ	NWMN_1610	aminotransferase class V
NWMN_0686	hypothetical protein	15511	15186	2346	9918	10802	6517	9286	2352	6676	5355	11562	6840	15348.5	10360	5819	8458.5	0.674985	0.379125	0.551096	E		NWMN_1660	riboflavin biosynthesis protein	1.03564	0.716442	0.702711	SA1587	ribA	ribA	riboflavin biosynthesis protein
NWMN_0687	sulfatase	26605	22791	13992	14307	16750	12358	22230	16850	12560	24174	22377	13883	24698	15528.5	19540	23275.5	0.628735	0.791157	0.942404	M		NWMN_1474	phosphate starvation-induced protein PhoH-like protein	0.752407	0.704657	0.702849	SA1400	phoH	phoH	phosphate starvation-induced protein PhoH-like protein
NWMN_0688	ABC transporter ATP-binding protein	4904.5	6037.5	1932	3378	5112.5	2495	2994	3400.5	1730.5	3708.5	3355.5	1356.5	5471	4245.25	3197.25	3532	0.775955	0.5844	0.645586	R		NWMN_0909	hypothetical protein	0.778328	0.595497	0.70287	SA0892	-	NWMN_0909	hypothetical protein
NWMN_0689	ATP-dependent DNA helicase RecQ	5528	7433	3672	3951	6163	4078	3590	4173	3234	4636	5527	2893	6480.5	5057	3881.5	5081.5	0.780341	0.598951	0.784122	L		NWMN_0162	formate acetyltransferase	1.0496	0.9707	0.703285	SA0218	pflB	pflB	formate acetyltransferase
NWMN_0690	ABC transporter	8225	5849	3795	3517	4902	4693	7132	3556	3048	3207	3537	3186	7037	4209.5	5344	3372	0.598195	0.759415	0.479181	E		NWMN_1296	PhoU family transcriptional regulator	0.766162	0.866575	0.703514	SA1217	phoU	phoU	PhoU family transcriptional regulator
NWMN_0691	amino acid ABC transporter permease protein	8542	5974	4355	3907	4704	5638	7489	3758	3045	3879	4009	3538	7258	4305.5	5623.5	3944	0.593207	0.7748	0.5434	E		NWMN_2229	oxidoreductase short chain dehydrogenase/reductase	0.770366	0.98531	0.70369	SA2119	gdhII	NWMN_2229	oxidoreductase short chain dehydrogenase/reductase
NWMN_0692	histidinol-phosphate aminotransferase HisC1	1206	1719	690.5	878.9	1386	684.2	896.4	838.2	477.1	709.1	1047	392.3	1462.5	1132.45	867.3	878.05	0.774325	0.593026	0.600376	E		NWMN_0805	D-alanine--poly(phosphoribitol) ligase subunit 2	0.87672	0.507979	0.704042	SA0795	dltC	dltC	D-alanine--poly(phosphoribitol) ligase subunit 2
NWMN_0693	hypothetical protein	1191	1420	770.5	821.8	1394	1025	1140	983.8	752	1225	902.6	628.7	1305.5	1107.9	1061.9	1063.8	0.84864	0.813405	0.81486	S		NWMN_2289	hypothetical protein	0.67289	0.567331	0.704287	SA2177	-	NWMN_2289	hypothetical protein
NWMN_0695	hypothetical protein	11712	4275	3514	2542	3985	6870	13333	423.3	6791	2471	3259	5362	7993.5	3263.5	6878.15	2865	0.408269	0.860468	0.358416	I		NWMN_1071	hypothetical protein	0.807081	0.625965	0.704357	SAS035	-	NWMN_1071	hypothetical protein
NWMN_0696	di-/tripeptide ABC transporter	5511.29	4388.57	2328.14	4004.71	5437.14	3091.14	5769.43	3514.71	2278.71	5223.43	4349.57	2138.71	4949.93	4720.93	4642.07	4786.5	0.953737	0.937806	0.966984	E		NWMN_2228	hypothetical protein	0.881448	0.775011	0.704408	SA2118	-	NWMN_2228	hypothetical protein
NWMN_0697	7-cyano-7-deazaguanine reductase	948.5	895.2	507.6	935.3	744.4	648.1	1116	569.7	463.3	1146	736.7	454.8	921.85	839.85	842.85	941.35	0.911048	0.914303	1.02115	R		NWMN_1273	methionine sulfoxide reductase A	0.871903	0.592286	0.704448	SA1194	msrA	msrA	methionine sulfoxide reductase A
NWMN_0698	integral membrane domain-containing protein	1885	1501	308.1	0.01	1324	1103	1180	538.8	655.7	150.5	820.7	620.8	1693	662.005	859.4	485.6	0.391025	0.50762	0.286828	G		NWMN_1609	thiamine biosynthesis protein ThiI	0.846993	0.603953	0.704471	SA1537	thiI	thiI	thiamine biosynthesis protein ThiI
NWMN_0699	ribonucleotide reductase stimulatory protein	61516	56803	30679	42936	56223	46462	40274	40596	25924	40581	39843	20326	59159.5	49579.5	40435	40212	0.838065	0.683491	0.679722	F		NWMN_2216	hypothetical protein	0.517353	0.713074	0.704626	SA2107	-	NWMN_2216	hypothetical protein
NWMN_0700	ribonucleotide-diphosphate reductase subunit alpha	50244	47498	31601	33052	35449	36638	37351	34266	27522	40506	37326	22405	48871	34250.5	35808.5	38916	0.700835	0.732715	0.7963	F		NWMN_2334	hypothetical protein	0.600269	0.888786	0.704785	SA2223	-	NWMN_2334	hypothetical protein
NWMN_0701	ribonucleotide-diphosphate reductase subunit beta	25011.6	23645.7	18162.7	17525.7	20805	16312.4	22936.7	19365.4	15338.6	23940.6	23265.9	14239.6	24328.6	19165.4	21151.1	23603.2	0.787769	0.86939	0.970182	F		NWMN_2225	hex regulon repressor	0.801315	0.797558	0.704998	SA2115	-	NWMN_2225	hex regulon repressor
NWMN_0702	ferrichrome ABC transporter permease	249.5	377.4	190.7	124.1	148.7	143.9	273	205.7	152.6	326.4	296.1	164.8	313.45	136.4	239.35	311.25	0.435157	0.763599	0.992981	P		NWMN_0398	type I restriction-modification system M subunit	0.748307	0.538514	0.705819	SA0391	hsdM	hsdM	type I restriction-modification system M subunit
NWMN_0703	iron compound ABC transporter permease protein	117.5	194.3	73.96	84.79	105.8	92.75	78.69	93.72	87.22	162.8	122.6	97.76	155.9	95.295	86.205	142.7	0.611257	0.552951	0.91533	P		NWMN_0045	hypothetical protein	0.887396	0.681363	0.705858	SA0096	-	NWMN_0045	hypothetical protein
NWMN_0704	ABC transporter ATP-binding protein	337.7	375.4	216.6	136	174.1	228	305.3	226.7	182	310.1	237.9	199.8	356.55	155.05	266	274	0.434862	0.746038	0.768476	P		NWMN_1515	O-methyltransferase	0.632424	0.538275	0.706115	SA1442	-	NWMN_1515	O-methyltransferase
NWMN_0705	ferrichrome ABC transporter lipoprotein	439.4	681	391	334.2	540.2	523	323.2	394.3	318.3	395.4	532	340.8	560.2	437.2	358.75	463.7	0.780436	0.640396	0.82774	P		NWMN_1198	pyruvate flavodoxin ferredoxin oxidoreductase alpha subunit	0.667289	0.519892	0.706689	SA1131	porA	porA	pyruvate flavodoxin ferredoxin oxidoreductase alpha subunit
NWMN_0706	hypothetical protein	5542	6532	2589	4937	6824	3232	3367	4557	2339	4868	5062	2189	6037	5880.5	3962	4965	0.974077	0.656286	0.822428	S		NWMN_1577	primosomal protein DnaI	0.703858	0.43543	0.706846	SA1507	dnaI	dnaI	primosomal protein DnaI
NWMN_0707	UDP-N-acetylenolpyruvoylglucosamine reductase	3832.43	4416.43	1410.74	3755.14	4352.86	1734.23	2472.43	2702.86	1353.11	3346	3128.43	1211.37	4124.43	4054	2587.64	3237.21	0.982924	0.627394	0.784888	M		NWMN_0164	hypothetical protein	0.884577	0.705755	0.706873	SA0220	glpQ1	NWMN_0164	hypothetical protein
NWMN_0708	hypothetical protein	605.4	465.1	225.1	555.1	417	202.2	446.5	306.3	246	618.8	359.9	209.7	535.25	486.05	376.4	489.35	0.90808	0.703223	0.914246	S		NWMN_2082	aerobactin biosynthesis protein	0.672615	0.568566	0.707344	SA1983	-	NWMN_2082	aerobactin biosynthesis protein
NWMN_0709	hypothetical protein	2226	2949	1629	2055	2192	1342	2584	2419	1813	3881	2734	1857	2587.5	2123.5	2501.5	3307.5	0.820676	0.966763	1.27826			NWMN_0556	hypothetical protein	0.734047	0.965331	0.707556	SA0550	ywzC	NWMN_0556	hypothetical protein
NWMN_0710	hypothetical protein	5804	4607	3300	4201	3740	4300	5357	2734	3837	5102	4090	3584	5205.5	3970.5	4045.5	4596	0.762751	0.777159	0.882912			NWMN_2571	imidazole glycerol phosphate synthase subunit hisF	0.833115	0.668928	0.707805	SA2465	hisF	hisF	imidazole glycerol phosphate synthase subunit hisF
NWMN_0711	glycerate kinase	1953	2103	1165	1598	1989	1728	2596	1110	993.5	2325	1639	1149	2028	1793.5	1853	1982	0.884369	0.913708	0.977318	G		NWMN_1757	hypothetical protein	0.946809	0.61896	0.707892	SA1682	-	NWMN_1757	hypothetical protein
NWMN_0712	peptidase T	5429	7152	3195	4412	5698	3433	4230	4026	3003	5504	5200	2843	6290.5	5055	4128	5352	0.803593	0.656228	0.850807	E		NWMN_0578	hypothetical protein	0.74975	0.456766	0.708017	SA0563	-	NWMN_0578	hypothetical protein
NWMN_0713	hypothetical protein	1451	1796	705.2	1279	1738	724.6	970.4	1123	599.6	1303	1502	623.2	1623.5	1508.5	1046.7	1402.5	0.929165	0.644718	0.863874	S		NWMN_2501	4-aminobutyrate aminotransferase	0.737517	0.529215	0.708262	SA2397	gabT	NWMN_2501	4-aminobutyrate aminotransferase
NWMN_0714	hypothetical protein	636.714	915.857	219.643	638.314	716.771	222.534	461.486	448.171	207.514	547.229	526.714	184.111	776.286	677.543	454.829	536.971	0.872801	0.585904	0.691719	S		NWMN_1819	low molecular weight phosphotyrosine protein phosphatase	0.714652	0.985379	0.708944	SA1697	ptpA	NWMN_1819	low molecular weight phosphotyrosine protein phosphatase
NWMN_0715	GGDEF domain-containing protein	1388	2407	759.7	1265	1590	853.7	1531	1448	955.2	1924	1557	710.3	1897.5	1427.5	1489.5	1740.5	0.752306	0.78498	0.91726	T		NWMN_0148	hypothetical protein	0.792811	0.816864	0.709338	SA0203	-	NWMN_0148	hypothetical protein
NWMN_0716	phospho-N-acetylmuramoyl-pentapeptide-transferase	4625	5322	2024	4325	4175	3016	3044	2801	2140	5470	4489	2160	4973.5	4250	2922.5	4979.5	0.854529	0.587614	1.00121	M		NWMN_2233	LysR family regulatory protein	0.845749	0.729087	0.709541	SA2123	-	NWMN_2233	LysR family regulatory protein
NWMN_0717	hypothetical protein	3093	2675	1124	1695	2457	1201	2066	1361	990.6	1263	1876	959.4	2884	2076	1713.5	1569.5	0.719834	0.59414	0.544209	S		NWMN_2540	PTS system fructose-specific IIABC component	0.826372	0.624281	0.710431	SA2434	fruA	NWMN_2540	PTS system fructose-specific IIABC component
NWMN_0718	degV	2938.75	2569.4	1223.53	2504.4	2671.75	1667.6	2987.93	1687.2	1361.03	3124.25	2005.92	1207.83	2754.07	2588.07	2337.56	2565.09	0.939726	0.848765	0.931379	S		NWMN_0937	phosphoribosylformylglycinamidine synthase II	0.976924	0.71449	0.710477	SA0921	purL	purL	phosphoribosylformylglycinamidine synthase II
NWMN_0719	comf operon protein 1	308.829	180.757	118.114	105.031	142.186	142.029	602.129	75.9486	125.449	100.843	133.137	140.274	244.793	123.609	339.039	116.99	0.504952	1.385	0.477914	L		NWMN_0557	pyridine nucleotide-disulfide oxidoreductase	0.704199	0.387656	0.710489	SA0551	merA	NWMN_0557	pyridine nucleotide-disulfide oxidoreductase
NWMN_0720	hypothetical protein	748.3	517.5	304.8	621.7	341.2	452.9	479.5	246.8	370.2	302.9	254.6	281.7	632.9	481.45	363.15	278.75	0.760705	0.573787	0.440433	R		NWMN_2212	inositol monophosphatase	0.678634	0.877088	0.710546	SA2104	suhB	NWMN_2212	inositol monophosphatase
NWMN_0721	sigma 54 modulation protein	27106	34227	29093	24183	24912	19873	35369	23449	28421	29528	28812	26835	30666.5	24547.5	29409	29170	0.800466	0.958994	0.951201	J		NWMN_0523	sdrC protein	0.611111	0.693404	0.711033	SA0519	sdrC	sdrC	sdrC protein
NWMN_0722	preprotein translocase subunit SecA	5385.86	8595.43	3257.29	3949.29	9585.43	4845.14	3907.71	5077.71	3054.57	4626.86	5109.57	2278.86	6990.64	6767.36	4492.71	4868.21	0.968059	0.642675	0.69639	U		NWMN_1862	hypothetical protein	0.73968	0.57123	0.711327	SA1739	-	NWMN_1862	hypothetical protein
NWMN_0723	peptide chain release factor 2	3407.29	3918.57	706.257	3217.57	4130.57	1702.57	1980.57	599.914	954.014	1835	1906	686.257	3662.93	3674.07	1290.24	1870.5	1.00304	0.352244	0.510657	J		NWMN_1725	uroporphyrinogen decarboxylase	0.890735	0.555319	0.711368	SA1652	hemE	hemE	uroporphyrinogen decarboxylase
NWMN_0724	secretory antigen SsaA-like protein	140.8	165.6	89.27	101.4	220.8	108.5	88.91	114.4	69.36	160.6	114.7	60.64	153.2	161.1	101.655	137.65	1.05157	0.663544	0.898499	M		NWMN_2557	hypothetical protein	0.695568	0.829617	0.712084	SA2451	-	NWMN_2557	hypothetical protein
NWMN_0725	hypothetical protein	3057	4116	771.5	3523	3362	753.9	2568	2041	686.4	2818	2396	394.4	3586.5	3442.5	2304.5	2607	0.959849	0.642548	0.726893	R		NWMN_1960	dihydroxy-acid dehydratase IlvD	0.573795	0.597227	0.712183	SA1858	ilvD	ilvD	dihydroxy-acid dehydratase IlvD
NWMN_0726	excinuclease ABC subunit B	4321.5	4089.5	1504	2988.5	3756	2037	2690.5	2629.5	1613	3958.5	3539.5	1796	4205.5	3372.25	2660	3749	0.801867	0.632505	0.891452	L		NWMN_1469	DNA repair protein RecO	0.678847	0.896633	0.712521	SA1395	recO	recO	DNA repair protein RecO
NWMN_0727	excinuclease ABC subunit A	10492	6579	5044	5698	6785	8488	7558	4941	4962	6742	6109	6240	8535.5	6241.5	6249.5	6425.5	0.73124	0.732177	0.752797	L		NWMN_0449	hypothetical protein	0.723873	0.683011	0.712528	SA0443	-	NWMN_0449	hypothetical protein
NWMN_0728	HPr kinase/phosphorylase	8537	10121	3027	7475	10071	4830	4730	6194	3643	7145	7557	3368	9329	8773	5462	7351	0.940401	0.585486	0.787973	T		NWMN_1145	signal recognition particle-docking protein FtsY	0.678	0.571714	0.712667	SA1078	ftsY	ftsY	signal recognition particle-docking protein FtsY
NWMN_0729	prolipoprotein diacylglyceryl transferase	11746	11117	4333	7515	11095	6202	6196	6437	4552	8061	7781	3758	11431.5	9305	6316.5	7921	0.813979	0.552552	0.69291	M		NWMN_0286	hypothetical protein	0.689577	0.718928	0.712912		-	NWMN_0286	hypothetical protein
NWMN_0730	acetyltransferase	4810	4687	2238	3179	4171	2433	3769	2949	2130	4115	3876	2132	4748.5	3675	3359	3995.5	0.773929	0.707381	0.841424	R		NWMN_0209	choloylglycine hydrolase	0.789691	0.537016	0.71331	SA0264	-	NWMN_0209	choloylglycine hydrolase
NWMN_0731	TPR domain-containing protein	6781	6567	3068	4457	5489	3845	4153	4207	2493	5467	5871	3094	6674	4973	4180	5669	0.74513	0.626311	0.849416	R		NWMN_0393	superantigen-like protein	0.729297	1.42326	0.713601		ssl6	set6nm	superantigen-like protein
NWMN_0732	thioredoxin reductase	20925	29807	8113	13636	17146	11039	12315	16623	9015	20628	28187	11937	25366	15391	14469	24407.5	0.606757	0.570409	0.962213	O		NWMN_0244	hypothetical protein	0.652635	0.652913	0.713688	SA0290	-	NWMN_0244	hypothetical protein
NWMN_0733	hypothetical protein	65178	64577	60907	49697	64655	65181	65156	55113	59966	56385	56670	64687	64877.5	57176	60134.5	56527.5	0.881292	0.926893	0.871296	R		NWMN_0160	sensor histidine kinase	0.705421	0.551715	0.713808	SA0216	walK	NWMN_0160	sensor histidine kinase
NWMN_0734	hypothetical protein	44394	27777	30704	22422	29946	43426	42991	27664	27410	32629	23131	34700	36085.5	26184	35327.5	27880	0.72561	0.978994	0.772609	S		NWMN_1607	thiol peroxidase	0.825829	0.751448	0.71383	SA1535	tpx	tpx	thiol peroxidase
NWMN_0735	hypothetical protein	19951	17901	15679	12981	13683	18595	24691	14296	14487	17224	12853	17048	18926	13332	19493.5	15038.5	0.704428	1.02999	0.794595	S		NWMN_1923	hypothetical protein	0.553222	0.620374	0.713866		-	NWMN_1923	hypothetical protein
NWMN_0736	ATP-dependent Clp protease proteolytic subunit ClpP	2508	3928	2139	2063	3736	1509	3668	3011	2212	2358	2514	1242	3218	2899.5	3339.5	2436	0.901025	1.03776	0.756992	O		NWMN_0598	monovalent cation/H+ antiporter subunit F	0.418435	0.794522	0.714135	SA0583	mnhF	mnhF	monovalent cation/H+ antiporter subunit F
NWMN_0737	hypothetical protein	19209	7455	11124	4896	7872	13568	16669	7727	11831	6445	7467	11019	13332	6384	12198	6956	0.478848	0.914941	0.521752	R		NWMN_2178	molybdenum ABC transporter permease protein	0.824033	0.855105	0.714437	SA2073	modB	modB	molybdenum ABC transporter permease protein
NWMN_0738	hypothetical protein	65178	52817	36818	28118	50222	65179	50238	35034	40361	28898	27521	38405	58997.5	39170	42636	28209.5	0.663926	0.722675	0.478147			NWMN_0946	hypothetical protein	0.614858	0.991107	0.714598	SA0931	-	NWMN_0946	hypothetical protein
NWMN_0740	glycolytic operon regulator	21438	12710	7760	15054	16636	17078	17234	11325	7004	11086	7615	6431	17074	15845	14279.5	9350.5	0.928019	0.83633	0.547646	K		NWMN_0051	integral membrane domain-containing protein	0.795225	0.978652	0.714888	SA0103	-	NWMN_0051	integral membrane domain-containing protein
NWMN_0741	glyceraldehyde-3-phosphate dehydrogenase type I	26180	28449	13412	22873	22823	18717	20861	21919	10731	17433	19398	13844	27314.5	22848	21390	18415.5	0.836479	0.783101	0.674202	G		NWMN_1522	hypothetical protein	0.761737	0.701373	0.715001		-	NWMN_1522	hypothetical protein
NWMN_0742	phosphoglycerate kinase	39494	44833	9190	35298	35277	30259	24135	1955	17367	14717	26272	22512	42163.5	35287.5	13045	20494.5	0.836921	0.309391	0.486072	G		NWMN_2576	histidinol dehydrogenase	0.597478	0.508793	0.715684	SA2470	hisD	hisD	histidinol dehydrogenase
NWMN_0743	triosephosphate isomerase	37167	38888	20959	29636	38736	37742	24705	32402	21200	25825	25183	22869	38027.5	34186	28553.5	25504	0.898981	0.750865	0.670673	G		NWMN_0599	monovalent cation/H+ antiporter subunit G	0.469908	0.835203	0.715696	SA0584	mnhG	mnhG	monovalent cation/H+ antiporter subunit G
NWMN_0744	phosphoglyceromutase	43026	49131	25984	28882	45294	47898	28240	6018	23992	27890	31435	26895	46078.5	37088	17129	29662.5	0.804887	0.371735	0.643738	G		NWMN_1971	serine-protein kinase RsbW	0.625832	0.790177	0.715831	SA1870	rsbW	rsbW	serine-protein kinase RsbW
NWMN_0745	enolase	17052	22713	14258	14186	17931	13805	19873	17601	11373	15362	18099	12348	19882.5	16058.5	18737	16730.5	0.80767	0.942387	0.841469	G		NWMN_1530	hypothetical protein	0.792352	0.497403	0.716017	SA1455	-	NWMN_1530	hypothetical protein
NWMN_0746	hypothetical protein	7724	7881	4581	6115	6518	5150	7270	6176	5459	10226	7925	5091	7802.5	6316.5	6723	9075.5	0.809548	0.861647	1.16315			NWMN_1998	transcriptional regulator TenA	0.82163	0.516646	0.716048	SA1897	tenA	NWMN_1998	transcriptional regulator TenA
NWMN_0747	preprotein translocase subunit SecG	17223	18609	7815	16644	2781	10884	17992	13974	10393	20633	16731	9218	17916	9712.5	15983	18682	0.542113	0.892108	1.04276	U		NWMN_2162	acriflavin resistance protein	0.659511	0.57726	0.717218	SA2056	-	NWMN_2162	acriflavin resistance protein
NWMN_0748	carboxylesterase	5973	6389	2402	4470	6440	4112	3368	3641	2466	5666	4549	2721	6181	5455	3504.5	5107.5	0.882543	0.566979	0.826323	R		NWMN_0184	hexitol dehydrogenase	0.986701	0.591681	0.717317	SA0240	gatD	NWMN_0184	hexitol dehydrogenase
NWMN_0749	ribonuclease R	9740	6008	5213	6524	6089	9498	9517	4511	3675	8551	5069	6119	7874	6306.5	7014	6810	0.800927	0.89078	0.864872	K		NWMN_2089	BCCT family osmoprotectant transporter	0.787668	1.18366	0.717717	SA1987	opuD2	NWMN_2089	BCCT family osmoprotectant transporter
NWMN_0750	SsrA-binding protein	7020	5456	4490	6336	6016	6566	8111	4027	3613	3468	4541	4912	6238	6176	6069	4004.5	0.990061	0.972908	0.641953	O		NWMN_1471	cytidine deaminase	0.666038	0.665828	0.718215	SA1397	cdd	NWMN_1471	cytidine deaminase
NWMN_0751	hypothetical protein	426.7	439	182.7	412.5	409.3	275.9	310.7	288.5	207.6	469.1	366.2	205.9	432.85	410.9	299.6	417.65	0.94929	0.692157	0.964884			NWMN_1059	hypothetical protein	0.900697	0.628485	0.718687		-	NWMN_1059	hypothetical protein
NWMN_0752	hypothetical protein	2123	3073.5	1731.5	1236.5	1692.5	971.5	2971.5	2314.5	2115.5	2758	3002	1560	2598.25	1464.5	2643	2880	0.563649	1.01722	1.10844			NWMN_2566	intercellular adhesion protein IcaD	0.868584	0.424111	0.718897	SA2460	icaD	icaD	intercellular adhesion protein IcaD
NWMN_0753	hypothetical protein	10734	17613	7655	6398	9358	4627	11551	10923	8868	10978	13753	6505	14173.5	7878	11237	12365.5	0.555826	0.792818	0.872438			NWMN_0298	hypothetical protein	2.26594	4.17634	0.71909		-	NWMN_0298	hypothetical protein
NWMN_0754	hypothetical protein	16393	6209	6951	3776	6254	14492	8332	4326	5402	3806	4164	5346	11301	5015	6329	3985	0.443766	0.560039	0.352624			NWMN_0952	cytochrome d ubiquinol oxidase subunit I	0.972876	0.610898	0.719155	SA0937	cydA	cydA	cytochrome d ubiquinol oxidase subunit I
NWMN_0755	acetyltransferase	8095	3650	1329	2802	3416	6301	4988	2213	2351	764.3	2495	3706	5872.5	3109	3600.5	1629.65	0.529417	0.613112	0.277505	R		NWMN_0798	hypothetical protein	0.979938	0.690531	0.719538	SA0788	-	NWMN_0798	hypothetical protein
NWMN_0756	clumping factor	29243	25439	28789	12592	17217	32382	35861	21565	29508	15197	12476	29327	27341	14904.5	28713	13836.5	0.545134	1.05018	0.506071	M		NWMN_2263	DNA-binding response regulator ND	0.976613	0.560632	0.719792	SA2151	hssR	NWMN_2263	DNA-binding response regulator ND
NWMN_0757	secreted von Willebrand factor-binding protein VWbp	166.25	142.936	99.7971	78.4229	108.73	109.443	114.68	157.533	79.31	134.796	103.57	91.3657	154.593	93.5764	136.106	119.183	0.605309	0.880419	0.770947			NWMN_2047	mannose-6-phosphate isomerase class I	0.727163	0.884909	0.71992	SA1945	manA	manA1	mannose-6-phosphate isomerase class I
NWMN_0758	extracellular matrix and plasma binding protein	1420	2190	1044	1033	1327	1040	1493	748.8	949.5	756	1964	1335	1805	1180	1120.9	1360	0.65374	0.620997	0.753463			NWMN_1533	histidyl-tRNA synthetase	0.731698	0.664108	0.72009	SA1457	hisS	hisS	histidyl-tRNA synthetase
NWMN_0759	extracellular matrix and plasma binding like	1932	440.2	426.3	119.5	284	226.6	609.3	183.9	131.4	187.7	172.5	263.3	1186.1	201.75	396.6	180.1	0.170095	0.334373	0.151842			NWMN_0826	FMN oxidoreductase	0.886416	0.66442	0.720103	SA0817	namA	NWMN_0826	FMN oxidoreductase
NWMN_0760	staphylococcal nuclease	16024	29150	23998	7727	14933	5690	22717	21329	15980	19156	24944	11097	22587	11330	22023	22050	0.501616	0.97503	0.976225	L		NWMN_2103	hypothetical protein	0.897876	0.548006	0.720425		-	NWMN_2103	hypothetical protein
NWMN_0761	cold-shock protein CSD	2761	5576	3736	3066	3579	2407	5178	3924	3910	4328	4294	2396	4168.5	3322.5	4551	4311	0.797049	1.09176	1.03418	K		NWMN_1573	50S ribosomal protein L35	0.929804	0.665144	0.720651	SA1503	rpmI	rpmI	50S ribosomal protein L35
NWMN_0762	hypothetical protein	2417.71	2009.71	3623.29	966.943	1565.43	3246.86	2645.86	1566.71	3848	1671.86	1780.57	2592.57	2213.71	1266.19	2106.29	1726.21	0.571973	0.951471	0.779782			NWMN_1695	transposase	0.91654	0.645946	0.721224		-	NWMN_1695	transposase
NWMN_0763	hypothetical protein	2344	1753	3035	1060	4.988	2163	2450	1726	2772	2007	1994	1830	2048.5	532.494	2088	2000.5	0.259943	1.01928	0.976568			NWMN_0360	hypothetical protein	0.723965	0.683017	0.721314	SA0355	-	NWMN_0360	hypothetical protein
NWMN_0764	hypothetical protein	748.1	1047	305.2	739.2	867	352.1	584.8	546.4	289.6	1207	610.3	213.4	897.55	803.1	565.6	908.65	0.894769	0.63016	1.01237			NWMN_2298	uroporphyrin-III C-methyltransferase	1.17246	0.884843	0.721347	SA2186	nasF	cysG	uroporphyrin-III C-methyltransferase
NWMN_0765	hypothetical protein	669.1	593.6	377.1	228.5	372.5	490.7	554.6	315.8	362.7	405.4	336.3	429.7	631.35	300.5	435.2	370.85	0.475964	0.689317	0.587392			NWMN_1058	excinuclease ABC subunit C	0.695495	0.875024	0.721393	SA0993	uvrC	uvrC	excinuclease ABC subunit C
NWMN_0766	hypothetical protein	8763	4463	3727	2376	3616	8119	4083	3335	9769	5154	4976	8462	6613	2996	3709	5065	0.453047	0.560865	0.765916			NWMN_0981	protoheme IX farnesyltransferase	0.729095	0.670039	0.721847	SA0965	ctaB	cyoD	protoheme IX farnesyltransferase
NWMN_0768	phosphoglycerate mutase	168.2	211.7	140.3	135	156.6	125.4	222.3	230.8	199.5	302.6	261.1	186.8	189.95	145.8	226.55	281.85	0.76757	1.19268	1.48381	G		NWMN_2249	hypothetical protein	0.888786	0.60079	0.722119	SA2138	-	NWMN_2249	hypothetical protein
NWMN_0769	LysE/YggA	5465	7688	3353	6330	6590	2765	6338	5380	4205	6918	5924	2739	6576.5	6460	5859	6421	0.982285	0.890899	0.976355	R		NWMN_2462	squalene desaturase	0.812133	1.09067	0.722291	SA2349	crtM	crtM	squalene desaturase
NWMN_0770	hypothetical protein	20942	26312	11634	20406	26245	20285	14022	16656	12727	19148	18033	9090	23627	23325.5	15339	18590.5	0.987239	0.649215	0.786833	K		NWMN_0181	PTS system component	0.948673	0.715007	0.722401	SA0237	gatB	NWMN_0181	PTS system component
NWMN_0771	OsmC-like protein	4694	2515	2444	4019	3856	3756	6494	2695	2324	2773	2174	1763	3604.5	3937.5	4594.5	2473.5	1.09238	1.27466	0.686226	O		NWMN_1683	Dipeptidyl aminopeptidases/acylaminoacyl-peptidases DAP2	0.718053	0.635783	0.723051	SA1611	-	NWMN_1683	Dipeptidyl aminopeptidases/acylaminoacyl-peptidases DAP2
NWMN_0772	3-dehydroquinate dehydratase	1368	2225	731.8	1561	1926	883.6	1273	1186	659.2	2211	1636	556.2	1796.5	1743.5	1229.5	1923.5	0.970498	0.684386	1.07069	E		NWMN_0035	LysR family regulatory protein	0.690018	0.534799	0.723214		-	NWMN_0035	LysR family regulatory protein
NWMN_0773	nitroreductase	3931	5502	2075	2912	4371	2720	3372	3095	2448	4818	4051	2226	4716.5	3641.5	3233.5	4434.5	0.772077	0.685572	0.94021	C		NWMN_1061	succinate dehydrogenase flavoprotein subunit	0.699475	0.382312	0.723332	SA0995	sdhA	sdhA	succinate dehydrogenase flavoprotein subunit
NWMN_0774	thioredoxin	3800	6969	1525	3263	5342	1425	4448	2353	1804	1550	4270	1016	5384.5	4302.5	3400.5	2910	0.799053	0.631535	0.54044	O		NWMN_2543	N-acetylmuramoyl-L-alanine amidase	0.551714	0.56842	0.723504	SA2437	-	NWMN_2543	N-acetylmuramoyl-L-alanine amidase
NWMN_0775	hypothetical protein	14887	20266	9215	12331	13648	6842	15597	13917	8917	17226	17375	7425	17576.5	12989.5	14757	17300.5	0.739027	0.839587	0.984297	P		NWMN_2403	gluconate operon transcriptional repressor	0.972854	0.600624	0.723844	SA2295	gntR	gntR	gluconate operon transcriptional repressor
NWMN_0776	glycine cleavage system protein H	3620	6118	3708	4104	4535	4290	5761	4493	3966	4861	4774	2918	4869	4319.5	5127	4817.5	0.887143	1.05299	0.989423	E		NWMN_0063	membrane transporter protein	0.648641	0.589734	0.724403	SA0115	sbnD	sbnD	membrane transporter protein
NWMN_0777	hypothetical protein	1034	2110	871	883.9	1426	987.5	878.2	879.4	603.3	937.7	802.9	436.9	1572	1154.95	878.8	870.3	0.734701	0.559033	0.553626	S		NWMN_1844	geranylgeranylglyceryl phosphate synthase-like protein	0.800702	0.543406	0.724838	SA1722	pcrB	pcrB	geranylgeranylglyceryl phosphate synthase-like protein
NWMN_0778	hypothetical protein	5399	3421	5242	3367	3693	5793	7630	4177	5694	4817	3161	5003	4410	3530	5903.5	3989	0.800454	1.33866	0.904535	L		NWMN_1921	helix-turn-helix domain-containing protein	0.770316	0.662595	0.725086	SA1805	-	NWMN_1921	helix-turn-helix domain-containing protein
NWMN_0779	hypothetical protein	4478	2769	3989	2274	2577	4788	5510	2435	3939	3198	2208	3697	3623.5	2425.5	3972.5	2703	0.66938	1.09632	0.745964	O		NWMN_2376	hypothetical protein	0.720148	1.14934	0.725193	SA2267	-	NWMN_2376	hypothetical protein
NWMN_0780	ABC transporter ATP-binding protein	6068	4501	1761	3051	5239	3174	3348	2931	1618	2475	3400	1772	5284.5	4145	3139.5	2937.5	0.784369	0.594096	0.555871	P		NWMN_0113	aldehyde dehydrogenase	0.983999	0.62507	0.725298	SA0162	aldA	aldA	aldehyde dehydrogenase
NWMN_0781	ABC transporter permease protein	8668	9711	5506	4494	7292	6910	4469	6287	3503	7326	7089	3773	9189.5	5893	5378	7207.5	0.641275	0.585233	0.784319	P		NWMN_0437	glutamate synthase subunit beta	0.711381	0.673382	0.725463	SA0431	gltD	gltD	glutamate synthase subunit beta
NWMN_0782	ABC transporter substrate-binding protein	5315	6792	4244.5	3210	5703.5	3993.5	3849	3523.48	4095	3912.14	5102	3211.5	6053.5	4456.75	3686.24	4507.07	0.736227	0.608944	0.74454	P		NWMN_2204	hypothetical protein	0.830641	0.659918	0.725773		-	NWMN_2204	hypothetical protein
NWMN_0784	hypothetical protein	2434	1611.5	1435	817.3	1315.4	1496.5	1435.8	1155.15	1282.4	1065.65	1040.35	835.35	2022.75	1066.35	1295.47	1053	0.527178	0.640452	0.520578	S		NWMN_0261	hypothetical protein	1.44013	0.553479	0.725857	SA0308	-	NWMN_0261	hypothetical protein
NWMN_0785	ABC transporter ATP-binding protein	37996	27772	25138	19136	22327	27350	37319	24874	21056	24015	19444	21857	32884	20731.5	31096.5	21729.5	0.630443	0.945642	0.660792	O		NWMN_2232	urocanate hydratase	1.07735	0.709382	0.725858	SA2122	hutU	hutU	urocanate hydratase
NWMN_0786	FeS assembly protein SufD	38425.4	25564.4	25085.7	16555.7	16559.4	23630.3	32192.3	18390	16681.6	22051.7	17304.6	21388	31994.9	16557.6	25291.1	19678.1	0.517506	0.790473	0.615039	O		NWMN_0494	hypothetical protein	0.66407	0.604351	0.725953	SA0490	yacO	NWMN_0494	hypothetical protein
NWMN_0787	aminotransferase	12059.3	12248.4	9493.71	7595.14	8510	10374.1	11060.7	10780.6	7344.57	12457.7	7109.29	10034	12153.9	8052.57	10920.6	9783.5	0.662553	0.898533	0.804971	E		NWMN_1377	chorismate synthase	0.897488	0.554243	0.726409	SA1299	aroC	aroC	chorismate synthase
NWMN_0788	nitrogen fixation protein NifU-like protein	20607	23914	16148	16422	16735	17291	18109	19878	14134	23255	14085	18859	22260.5	16578.5	18993.5	18670	0.74475	0.853238	0.838705	C		NWMN_0340	mttA/Hcf106 -related protein	0.751023	0.526348	0.726472	SA0335	tatA	tatA	mttA/Hcf106 -related protein
NWMN_0789	FeS assembly protein SufB	22440.5	20361	12956	10564.5	15022	11080	11026.5	13439.5	8825.5	14142	9596	11292.5	21400.8	12793.2	12233	11869	0.597794	0.571615	0.554607	O		NWMN_0334	hypothetical protein	0.792252	0.727987	0.726527		-	NWMN_0334	hypothetical protein
NWMN_0790	hypothetical protein	533	575.8	267.8	435.9	533.9	293.9	555.1	669.7	300.1	535.3	392.3	176.9	554.4	484.9	612.4	463.8	0.874639	1.10462	0.83658			NWMN_1409	short-chain oxidoreductase	0.783858	0.648317	0.726615	SA1333	-	NWMN_1409	short-chain oxidoreductase
NWMN_0791	CBS domain-containing protein	23953.7	10967.6	13681.7	6308.43	10658.7	18886.1	15540.6	7433.14	14123.4	6317.57	7012.57	11226.4	17460.6	8483.57	11486.9	6665.07	0.485868	0.657871	0.38172	P		NWMN_0725	hypothetical protein	0.959849	0.642548	0.726893	SA0711	yfbR	NWMN_0725	hypothetical protein
NWMN_0792	hypothetical protein	16744	8505	5096	4763	6992	4349	13317	4874	5245	3812	4272	3346	12624.5	5877.5	9095.5	4042	0.465563	0.720464	0.320171	R		NWMN_1480	hypothetical protein	1.00026	0.588126	0.726918	SA1406	rsmE	NWMN_1480	hypothetical protein
NWMN_0793	hypothetical protein	2510	1929	687.3	1963	2018	737.2	1862	1045	692	2001	1249	538.2	2219.5	1990.5	1453.5	1625	0.896824	0.654877	0.732147	S		NWMN_2468	acetyltransferase GNAT	2.10143	0.480154	0.727423	SA2355	-	NWMN_2468	acetyltransferase GNAT
NWMN_0794	hypothetical protein	1641.71	1620.29	737.114	1491.14	1477.43	797.686	1680.57	853.829	670.729	1927.29	1289	710.857	1631	1484.29	1267.2	1608.14	0.910046	0.776947	0.985986	R		NWMN_1580	glyceraldehyde 3-phosphate dehydrogenase 2	1.14228	1.56723	0.727455	SA1510	gapB	gapB	glyceraldehyde 3-phosphate dehydrogenase 2
NWMN_0795	5-nucleotidase	2479	2601	1446	1719	2165	1182	2034	1514	1063	2699	2011	1314	2540	1942	1774	2355	0.764567	0.698425	0.927165	F		NWMN_0293	hypothetical protein	1.64883	0.860753	0.727954		-	NWMN_0293	hypothetical protein
NWMN_0796	lipoyl synthase	4942	4853	2998	3616	4843	3529	4840	4038	3283	5054	4409	2893	4897.5	4229.5	4439	4731.5	0.863604	0.906381	0.966105	H		NWMN_2493	CocE/NonD family hydrolase	0.876175	0.717428	0.728141	SA2380	pepX	NWMN_2493	CocE/NonD family hydrolase
NWMN_0797	hypothetical protein	621.9	692.8	344.2	464.6	700.6	339.2	553.1	503.4	333.3	683.9	479.8	264.2	657.35	582.6	528.25	581.85	0.886286	0.803605	0.885145	S		NWMN_1563	uroporphyrinogen III synthase	0.852234	0.727522	0.728181	SA1493	hemD	hemD	uroporphyrinogen III synthase
NWMN_0798	hypothetical protein	703.75	1023.4	308.35	679.35	1013.15	331.6	563	629.65	332.15	569.25	673.5	192.5	863.575	846.25	596.325	621.375	0.979938	0.690531	0.719538			NWMN_0158	sugar phosphate antiporter	0.842082	0.699443	0.728505	SA0214	uhpT	uhpT	sugar phosphate antiporter
NWMN_0799	hypothetical protein	6572.8	10117.2	2998.6	4986.8	7559.2	1966	6236.6	6123	3225.8	7125.6	6960.4	2137.6	8345	6273	6179.8	7043	0.751708	0.740539	0.843978	S		NWMN_0634	secretory antigen SsaA-like protein	1.51554	0.676187	0.728528	SA0620	ssaA	NWMN_0634	secretory antigen SsaA-like protein
NWMN_0800	hydrolase	9754	14482	4478	6538	10887	3333	9856	8173	4716	8892	8999	3180	12118	8712.5	9014.5	8945.5	0.718972	0.743893	0.738199	G		NWMN_0168	3-hydroxyacyl-CoA dehydrogenase FadB-like protein	0.766105	0.473002	0.728707	SA0224	fadB	fadB	3-hydroxyacyl-CoA dehydrogenase FadB-like protein
NWMN_0801	D-isomer specific 2-hydroxyacid dehydrogenase NAD binding domain-containing protein	3091	3652.57	1527.71	1471.29	3198.43	1114.17	2671.43	1483.57	1378.29	1049.54	2124.29	821.486	3371.79	2334.86	2077.5	1586.91	0.692469	0.616142	0.470645	C		NWMN_2388	phosphoglucomutase/phosphomannomutase	0.889385	0.707231	0.729077	SA2279	manB	NWMN_2388	phosphoglucomutase/phosphomannomutase
NWMN_0802	hypothetical protein	22310	36916	6129	23747	40839	7422	7691	17918	3445	13440	16125	2511	29613	32293	12804.5	14782.5	1.0905	0.432395	0.49919			NWMN_1168	uridylate kinase	0.842043	0.674426	0.729535	SA1101	pyrH	pyrH	uridylate kinase
NWMN_0803	D-alanine--D-alanyl carrier protein ligase	13645.4	26544.4	8299.14	12982.1	27480.1	9691	5693.43	16174.6	6181.43	10607.7	15125.1	3725	20094.9	20231.1	10934	12866.4	1.00678	0.544117	0.640282	Q		NWMN_0073	capsular polysaccharide biosynthesis glycosyltransferase	0.400692	0.481685	0.729764	SA0124	cap5M	NWMN_0073	capsular polysaccharide biosynthesis glycosyltransferase
NWMN_0804	dltB protein	14622	23878	10141	10310	24076	12106	5673	15728	8886	8760	16201	4953	19250	17193	10700.5	12480.5	0.893143	0.55587	0.648338	M		NWMN_1524	aminotransferase class V	0.927318	0.656872	0.729776	SA1450	iscS2	NWMN_1524	aminotransferase class V
NWMN_0805	D-alanine--poly(phosphoribitol) ligase subunit 2	16983	27574	12186	12846	26218	14430	6880	15754	11091	11875	19495	6678	22278.5	19532	11317	15685	0.87672	0.507979	0.704042	I		NWMN_2436	hypothetical protein	1.04049	0.564236	0.729821	SA2325	-	NWMN_2436	hypothetical protein
NWMN_0806	poly D-alanine transfer protein	8725.67	15591.3	5832.67	6143	15507	9390	3985.33	8413.33	6038	5638.33	10144.3	3618	12158.5	10825	6199.33	7891.33	0.890324	0.509876	0.649038	M		NWMN_0034	hypothetical protein	0.562726	0.544073	0.729994		-	NWMN_0034	hypothetical protein
NWMN_0807	NifU domain-containing protein	2103	3618	1173	2386	77.2	1069	2651	2581	1310	2933	2502	708.5	2860.5	1231.6	2616	2717.5	0.430554	0.914525	0.950009	O		NWMN_1713	flavoprotein epiD	0.730074	0.503847	0.730074		epiD	bsaD	flavoprotein epiD
NWMN_0808	hypothetical protein	714.8	1198	538	728.9	927	462.2	1001	939	774.4	1365	1043	555	956.4	827.95	970	1204	0.865694	1.01422	1.25889	S		NWMN_2343	drug transporter	1.16021	0.719372	0.730105	SA2233	-	NWMN_2343	drug transporter
NWMN_0809	hypothetical protein	3809.43	5787.29	3395.71	3046	5482.43	3146.57	4381.14	4076.57	3052.29	3722.43	4209.71	2717.71	4798.36	4264.21	4228.86	3966.07	0.888682	0.881314	0.826548	C		NWMN_1069	fibrinogen-binding protein	0.329028	0.665443	0.730419	SA1003	efb	NWMN_1069	fibrinogen-binding protein
NWMN_0810	hypothetical protein	3005	5800	1739	3328	4050	1623	3265	3256	1659	4879	3857	1175	4402.5	3689	3260.5	4368	0.837933	0.740602	0.992164	S		NWMN_1765	recombination regulator RecX	0.839264	0.647457	0.730429	SA1690	recX	recX	recombination regulator RecX
NWMN_0811	NADH dehydrogenase	13236	9620	8512	9994	11851	11846	15004	6773	8640	9736	8747	8951	11428	10922.5	10888.5	9241.5	0.955767	0.952791	0.808672	C		NWMN_0130	branched-chain amino acid transport system II carrier protein	0.679219	0.597614	0.730597	SA0180	brnQ1	NWMN_0130	branched-chain amino acid transport system II carrier protein
NWMN_0812	cytosol aminopeptidase	1126	2110	888.9	1082	1371	766.7	1272	1210	943.2	1573	1576	776	1618	1226.5	1241	1574.5	0.758035	0.766996	0.973115	E		NWMN_2588	pyrrolidone-carboxylate peptidase	0.818207	0.650291	0.731057	SA2482	pcp	pcp	pyrrolidone-carboxylate peptidase
NWMN_0813	NhaC family sodium:proton (Na+:H+) antiporter	1466	1547	1230	518.3	1976	1908	374.4	1481	945.1	1023	1524	975.1	1506.5	1247.15	927.7	1273.5	0.827846	0.615798	0.845337	R		NWMN_1826	methionine aminopeptidase	0.817383	0.578475	0.731306	SA1704	map	map1	methionine aminopeptidase
NWMN_0814	two-component response regulator/competence factor transporting ATP-binding/permease protein	1897	2415	1265	974.9	2568	1841	932.6	1380	1059	1485	2088	1046	2156	1771.45	1156.3	1786.5	0.821637	0.536317	0.828618	Q		NWMN_0451	hypothetical protein	0.733919	0.577118	0.731318	SA0445	-	NWMN_0451	hypothetical protein
NWMN_0815	hypothetical protein	158.1	245.2	96.84	105.2	145.2	81.64	86.99	120.5	106	151.1	153.3	77.32	201.65	125.2	103.745	152.2	0.620878	0.514481	0.754773	P		NWMN_1122	primosomal protein N	0.75508	0.559527	0.731663	SA1055	priA	priA	primosomal protein N
NWMN_0816	CPA3 family monovalent cation:proton (H+) antiporter-3 subunit G (mnhG2)	4306	4144	3446	2530	3846	3708	4622	3022	3569	3726	4073	3238	4225	3188	3822	3899.5	0.754556	0.904615	0.922959	P		NWMN_2159	hypothetical protein	1.25055	0.588837	0.731714	SA2054	-	NWMN_2159	hypothetical protein
NWMN_0817	CPA3 family monovalent cation:proton (H+) antiporter-3 subunit F (mnhF2)	2461	1905	1992	1392	1899	1907	2541	1845	1696	2175	2206	1841	2183	1645.5	2193	2190.5	0.753779	1.00458	1.00344	P		NWMN_2428	hypothetical protein	0.833479	0.663247	0.731777		-	NWMN_2428	hypothetical protein
NWMN_0818	monovalent cation/H+ antiporter subunit E	8838	8354	5768	5432	8538	6491	8240	5712	6133	7450	8164	5707	8596	6985	6976	7807	0.812587	0.81154	0.908213	P		NWMN_0111	heme-degrading monooxygenase IsdI	0.960248	0.629456	0.731833	SA0160	isdI	NWMN_0111	heme-degrading monooxygenase IsdI
NWMN_0819	CPA3 family monovalent cation:proton (H+) antiporter-3 subunit D (mnhD2)	11103	9421	6127	6254	9575	7577	7260	6489	5958	8016	9207	5644	10262	7914.5	6874.5	8611.5	0.771243	0.669899	0.839164	C		NWMN_1899	hypothetical protein	0.93444	0.591869	0.731843		-	NWMN_1899	hypothetical protein
NWMN_0820	CPA3 family monovalent cation:proton (H+) antiporter-3 subunit C (mnhC2)	20344.5	20257	11614	11005	20607.5	16085	11288	12936.5	11409	14931.5	16376.5	10218.5	20300.8	15806.2	12112.2	15654	0.778604	0.596641	0.771105	P		NWMN_2480	hydrolase	0.771033	1.09053	0.731882	SA2367	-	NWMN_2480	hydrolase
NWMN_0821	monovalent cation/H+ antiporter subunit B	30143	29115	15384	18409	30074	22743	16017	10171	15578	13571	24827	15457	29629	24241.5	13094	19199	0.818168	0.441932	0.64798	P		NWMN_0793	hypothetical protein	0.896824	0.654877	0.732147	SA0782	-	NWMN_0793	hypothetical protein
NWMN_0822	monovalent cation/H+ antiporter subunit A	15778.7	15715.4	7601.71	10398.1	17362.1	11473	8247.57	10662.6	7683.43	11517	13074	6949.86	15747.1	13880.1	9455.07	12295.5	0.881443	0.600434	0.780812	C		NWMN_0052	transcriptional regulator GntR	0.673619	0.697751	0.732707	SA0104	norG	NWMN_0052	transcriptional regulator GntR
NWMN_0823	hypothetical protein	6293	6516	2371	5078	6429	2557	3627	3390	2452	4580	4368	1679	6404.5	5753.5	3508.5	4474	0.898353	0.547818	0.698571			NWMN_0161	lipoprotein	0.721677	0.568685	0.732777	SA0217	-	NWMN_0161	lipoprotein
NWMN_0824	peptidyl-prolyl cis-trans isomerase cyclophilin-type	2949	4327	1816	3262	3119	1587	3473	2506	1671	3967	2620	1012	3638	3190.5	2989.5	3293.5	0.876993	0.821743	0.905305	O		NWMN_2422	D-lactate dehydrogenase	0.402693	0.913409	0.733121	SA2312	ddh	NWMN_2422	D-lactate dehydrogenase
NWMN_0825	general stress protein 13	2647	3655	1860	2096	3021	2244	3845	2548	2600	3653	3151	1891	3151	2558.5	3196.5	3402	0.811964	1.01444	1.07966	J		NWMN_0159	AraC family DNA-binding response regulator	0.705222	0.698331	0.733183	SA0215	-	NWMN_0159	AraC family DNA-binding response regulator
NWMN_0826	FMN oxidoreductase	3023	7806	1607	3380	6219	1821	2738	4457	1251	3541	4257	845.6	5414.5	4799.5	3597.5	3899	0.886416	0.66442	0.720103	C		NWMN_1489	DNA polymerase III subunit delta	0.647432	0.589952	0.733353	SA1415	holA	holA	DNA polymerase III subunit delta
NWMN_0827	ornithine--oxo-acid transaminase	33607.4	43497	18143.1	30163.6	37528.1	23491	20982.4	25165.9	15764.4	27413.4	32892.6	16990.7	38552.2	33845.9	23074.1	30153	0.877923	0.598517	0.782134	E		NWMN_0517	haloacid dehalogenase-like hydrolase	0.733687	0.659999	0.733868	SA0513	-	NWMN_0517	haloacid dehalogenase-like hydrolase
NWMN_0828	glutamate dehydrogenase NAD-specific	26072.7	33808.6	17753	24521	31388.4	21755.9	22165.6	24477	18897.3	26019.6	28224.7	17390.7	29940.6	27954.7	23321.3	27122.1	0.933671	0.778917	0.905864	E		NWMN_0404	staphylococcal tandem lipoprotein	0.823245	0.658467	0.734385	NA		lpl2nm	staphylococcal tandem lipoprotein
NWMN_0830	glycerophosphoryl diester phosphodiesterase	2446.14	2279.29	691.7	3683	4607.14	1271.29	1249.29	1186.57	472.729	1750	1280	365.9	2362.71	4145.07	1217.93	1515	1.75437	0.515479	0.641212	C		NWMN_1294	hypothetical protein	0.921211	0.654676	0.734553	SA1215	-	NWMN_1294	hypothetical protein
NWMN_0831	argininosuccinate lyase	255.1	181.6	198.3	112.1	190.1	256.7	195.8	155.7	180.5	235.7	179.4	165.8	218.35	151.1	175.75	207.55	0.692008	0.8049	0.950538	E		NWMN_0606	teichoic acid biosynthesis protein	0.723202	0.704637	0.73505	SA0592	tagA	tagA	teichoic acid biosynthesis protein
NWMN_0832	argininosuccinate synthase	413.9	405.2	218.7	308	416	367.3	321.6	267	247	349.3	379.7	254.2	409.55	362	294.3	364.5	0.883897	0.718594	0.890001	E		NWMN_0149	FMN-dependent NADH-azoreductase	0.805787	0.731776	0.735121	SA0204	acpD	NWMN_0149	FMN-dependent NADH-azoreductase
NWMN_0833	glucose-6-phosphate isomerase	14275	22263	7844	13312	16326	7380	16273	8141	6760	8784	15347	4704	18269	14819	12207	12065.5	0.811156	0.668181	0.660436	G		NWMN_2251	esterase-like protein	0.884542	0.82306	0.735228	SA2140	-	NWMN_2251	esterase-like protein
NWMN_0834	hypothetical protein	1518	1982	882.4	1847	2252	1262	1198	1270	986.2	1930	1731	632.8	1750	2049.5	1234	1830.5	1.17114	0.705143	1.046	S		NWMN_1329	hypothetical protein	0.797805	0.74959	0.735503	SA1250	-	NWMN_1329	hypothetical protein
NWMN_0835	Signal peptidase IA	2249	2624	1100	2540	3273	1746	1857	785.8	1131	1633	2366	995.6	2436.5	2906.5	1321.4	1999.5	1.1929	0.542335	0.820644	U		NWMN_1276	ImpB/MucB/SamB family DNA-damage repair protein	0.520273	0.577964	0.735654	SA1196	dinB2	NWMN_1276	ImpB/MucB/SamB family DNA-damage repair protein
NWMN_0836	Signal peptidase IB	1590	2224	933.2	2002	2463	1589	1742	1384	1206	2398	1896	865.6	1907	2232.5	1563	2147	1.17069	0.819612	1.12585	U		NWMN_0295	hypothetical protein	1.59868	0.820967	0.735656		-	NWMN_0295	hypothetical protein
NWMN_0837	exonuclease RexB	5283.14	7059	3165.71	4189.71	5982.86	3899.71	3377.29	2904.86	2949.29	4741.14	5063.14	2565	6171.07	5086.29	3141.07	4902.14	0.824214	0.508999	0.794375	L		NWMN_0662	hypothetical protein	0.902887	0.75943	0.736293	SA0648	-	NWMN_0662	hypothetical protein
NWMN_0838	ATP-dependent nuclease subunit A	5428	6144	3623	3363	5946	4582	3903	3892	3770	5398	5196	3739	5786	4654.5	3897.5	5297	0.804442	0.673609	0.915486	L		NWMN_1113	carbamoyl phosphate synthase small subunit	0.977664	0.529508	0.73668	SA1045	carA	pyrAA	carbamoyl phosphate synthase small subunit
NWMN_0839	fumarylacetoacetate hydrolase	17542	26911	12862	15482	23966	12721	19252	19944	13043	16459	21187	10124	22226.5	19724	19598	18823	0.887409	0.88174	0.846872	Q		NWMN_1865	hypothetical protein	0.840117	0.614725	0.73671	SA1742	-	NWMN_1865	hypothetical protein
NWMN_0840	hypothetical protein	929.3	644.2	425.3	433.3	642.7	811.9	957	410.9	484.4	592.5	388.1	322.2	786.75	538	683.95	490.3	0.683826	0.869336	0.623197			NWMN_1714	epidermin biosynthesis protein EpiC authentic point mutation	0.693676	0.269122	0.736793		epiC	bsaC	epidermin biosynthesis protein EpiC authentic point mutation
NWMN_0841	coenzyme A disulfide reductase	11356	17341	6062	7151	14888	5769	7925	12534	5625	9841	12135	4277	14348.5	11019.5	10229.5	10988	0.76799	0.712932	0.765794	R		NWMN_0044	hypothetical protein	0.908884	0.693007	0.736837	SA0095	-	NWMN_0044	hypothetical protein
NWMN_0842	HAD superfamily hydrolase	6386.5	9664	1927.5	6058.5	8584	3488	4337.5	4097	1948	3651.5	5490.5	1458	8025.25	7321.25	4217.25	4571	0.912277	0.525498	0.569577	R		NWMN_0570	hypothetical protein	0.680422	0.603499	0.736937		-	NWMN_0570	hypothetical protein
NWMN_0843	hypothetical protein	42728	64289	26370	42260	61771	28508	35268	41988	25595	48948	58711	21680	53508.5	52015.5	38628	53829.5	0.972098	0.721904	1.006	R		NWMN_2488	dihydroorotate dehydrogenase 2	1.02132	0.593684	0.737037	SA2375	pyrD	pyrD	dihydroorotate dehydrogenase 2
NWMN_0844	hypothetical protein	183.8	189.1	83.92	111.9	170.5	83.8	202.8	105.7	67.19	251.3	144.8	57.12	186.45	141.2	154.25	198.05	0.757308	0.8273	1.06222	I		NWMN_1309	hippurate hydrolase	0.640485	0.550447	0.737069	SA1230	hipO	hipO	hippurate hydrolase
NWMN_0845	ATP-dependent Clp protease ATP-binding subunit ClpB	4732	1768	2382	1070	1402	3725	3368	1447	3083	1956	1611	2272	3250	1236	2407.5	1783.5	0.380308	0.740769	0.548769	O		NWMN_1857	manganese-dependent inorganic pyrophosphatase	0.73324	0.796781	0.737159	SA1735	ppaC	NWMN_1857	manganese-dependent inorganic pyrophosphatase
NWMN_0846	LysR family regulatory protein	580.086	1719	116.769	263.886	402.043	87.92	475.171	407.809	172.443	333.385	503.343	75.7571	1149.54	332.964	441.49	418.364	0.289649	0.384057	0.363939	K		NWMN_0531	hypothetical protein	0.664766	0.62173	0.737313	SA0526	-	NWMN_0531	hypothetical protein
NWMN_0847	2-isopropylmalate synthase	185.2	200.6	116.7	107.9	152.1	71.9	118.7	106.1	78.8	110	115.5	109.5	192.9	130	112.4	112.75	0.673924	0.582685	0.5845	E		NWMN_0664	quinolone resistance norA protein	0.835338	0.796443	0.737327	SA0650	norA	norA	quinolone resistance norA protein
NWMN_0848	Sua5/YciO/YrdC/YwlC	256.243	219.286	63.7629	153.043	163.229	81.8029	159.5	189.257	65.5886	155.7	127.929	52.9229	237.764	158.136	174.379	141.814	0.665094	0.733409	0.596449	J		NWMN_2379	hypothetical protein	0.797878	0.666892	0.737351	SA2269	-	NWMN_2379	hypothetical protein
NWMN_0849	hypothetical protein	956.957	1151.57	355.2	795.586	728.6	243.929	657.014	471.4	330.686	704.314	556.014	173.586	1054.26	762.093	564.207	630.164	0.722867	0.535167	0.597729	G		NWMN_2230	amino acid amidohydrolase	1.01315	0.611773	0.737609	SA2120	hipO2	NWMN_2230	amino acid amidohydrolase
NWMN_0850	hypothetical protein	1066	1309	395	636.8	802.4	234.5	983	699.3	421.9	972	929.9	263.3	1187.5	719.6	841.15	950.95	0.605979	0.708337	0.8008	R		NWMN_0800	hydrolase	0.718972	0.743893	0.738199	SA0790	pdxp	NWMN_0800	hydrolase
NWMN_0851	MHC class II analog protein	4275	7834	2932	6673	8489	6614	7664	10776	6738	7419	12021	5794	6054.5	7581	9220	9720	1.25213	1.52283	1.60542	R		NWMN_0210	peptidoglycan hydrolase	1.43396	0.536792	0.73828	SA0265	lytM	lytM	peptidoglycan hydrolase
NWMN_0852	hypothetical protein	503.6	632.7	279.3	346.9	636.7	283.6	345.4	420.8	344.4	420.3	504.4	271.1	568.15	491.8	383.1	462.35	0.865616	0.674294	0.813782			NWMN_0324	PTS system IIA component	0.899178	0.583027	0.738356	SA0320	-	NWMN_0324	PTS system IIA component
NWMN_0853	3-oxoacyl-(acyl carrier protein) synthase III	5063	4848	1545	4062	5561	2387	2887	4176	1240	4221	4040	1207	4955.5	4811.5	3531.5	4130.5	0.970941	0.712643	0.833518	I		NWMN_0384	transposase	0.411387	0.64361	0.738462	SA0379	tnp	tnp	transposase
NWMN_0854	3-oxoacyl- synthase	6357	6868	2234	5852	9673	3647	4488	5781	2510	6310	6564	2252	6612.5	7762.5	5134.5	6437	1.17391	0.776484	0.973459	I		NWMN_2397	fibronectin binding protein B	0.75364	0.47718	0.73859	SA2290	fnbB	fnbB	fibronectin binding protein B
NWMN_0855	hypothetical protein	568.6	719.8	237.2	616.2	610.7	240.3	511.6	396.9	242.1	683.4	507.4	153.8	644.2	613.45	454.25	595.4	0.952266	0.705138	0.924247			NWMN_1464	RNA polymerase sigma factor RpoD	0.585857	1.0453	0.738771	SA1390	sigA	sigA	RNA polymerase sigma factor RpoD
NWMN_0856	oligopeptide transport system permease protein	17672.4	21921.7	5486.43	13870	19867.4	6026.14	9146.86	10783	4178.57	12815.4	12105	2664.14	19797.1	16868.7	9964.93	12460.2	0.852081	0.503354	0.629397	E		NWMN_0369	hypothetical protein	0.684947	0.729174	0.739046	SA0363	-	NWMN_0369	hypothetical protein
NWMN_0857	oligopeptide ABC transporter permease protein	24823	24799	10285	15111	23310	13443	8699	13687	7905	15465	15387	6023	24811	19210.5	11193	15426	0.774274	0.451131	0.62174	E		NWMN_0992	integrase	0.592713	0.659981	0.739336	NA		int	integrase
NWMN_0858	oligopeptide transport ATP-binding protein	21809.1	17863.1	5865	10705.1	18257.9	11410.3	7476.86	7731.57	8087.86	6709.57	10510	6579.29	19836.1	14481.5	7604.21	8609.79	0.730056	0.383351	0.434045	E		NWMN_0429	secretory antigen SsaA-like protein	1.19387	0.392497	0.739479	SA0423	sle1	NWMN_0429	secretory antigen SsaA-like protein
NWMN_0859	oligopeptide ABC transporter ATP-binding protein	49715	40466	20802	19296	37632	32465	18806	21405	20380	24224	25280	15882	45090.5	28464	20105.5	24752	0.631264	0.445892	0.54894	E		NWMN_2172	molybdopterin-guanine dinucleotide biosynthesis protein MobB	0.847937	0.594196	0.73981	SA2067	mobB	mobB	molybdopterin-guanine dinucleotide biosynthesis protein MobB
NWMN_0860	oligopeptide ABC transporter substrate-binding protein	32003	23649	15019	12295	24458	20119	15344	14606	14547	16238	18034	11896	27826	18376.5	14975	17136	0.660408	0.538166	0.615827	E		NWMN_2164	hypothetical protein	0.971713	0.604535	0.739886	SA2059	-	NWMN_2164	hypothetical protein
NWMN_0861	oligopeptide ABC transporter substrate-binding protein	158.5	159	27.66	25.99	135.7	105.2	32.12	76.91	87.87	0.01	48.64	59.41	158.75	80.845	54.515	24.325	0.50926	0.343402	0.153228	E		NWMN_2375	NAD-dependent epimerase/dehydratase	0.766271	0.574482	0.740031	SA2266	bdhA	NWMN_2375	NAD-dependent epimerase/dehydratase
NWMN_0862	oligopeptide ABC transporter ATP-binding protein	132.1	109.4	105.5	90.01	102.6	113.9	67.89	76.96	88.94	76.48	87.15	68.91	120.75	96.305	72.425	81.815	0.797557	0.599793	0.677557	E		NWMN_1373	hypothetical protein	0.581213	0.531934	0.740082	SA1295	-	NWMN_1373	hypothetical protein
NWMN_0863	oligopeptide ABC transporter ATP-binding protein	414.9	223.7	214.2	220.7	254.4	278.5	242.7	156.1	153.4	216.9	167.6	177.3	319.3	237.55	199.4	192.25	0.743971	0.624491	0.602098	E		NWMN_0869	competence protein	0.794565	0.617609	0.740217	SA0858	coiA	NWMN_0869	competence protein
NWMN_0864	oligopeptide ABC transporter permease protein	276.7	235.1	152.6	199.1	242.9	263.6	241.7	170.1	112.9	206.9	178	139.7	255.9	221	205.9	192.45	0.863619	0.804611	0.752052	E		NWMN_0258	ROK	0.984254	0.551193	0.74022	SA0305	-	NWMN_0258	ROK
NWMN_0865	oligopeptide ABC transporter permease protein	538.514	671.029	390.786	468.714	615.657	506.686	403.7	546.843	290.886	569.343	481.214	303.757	604.771	542.186	475.271	525.279	0.896513	0.78587	0.868557	E		NWMN_0302	hypothetical protein	0.89734	0.712633	0.741176		-	NWMN_0302	hypothetical protein
NWMN_0866	tryptophanyl-tRNA synthetase	7610	10911	2800	8232	7778	2888	9664	5738	2399	9207	6192	1545	9260.5	8005	7701	7699.5	0.864424	0.831597	0.831435	J		NWMN_0223	diarrheal toxin	0.687103	0.632968	0.74118	SA0276	essC	NWMN_0223	diarrheal toxin
NWMN_0867	transcriptional regulator Spx	3555	4177	6698	7025	2827	3048	12280	6053	6806	7283	9983	10262	3866	4926	9166.5	8633	1.27419	2.37106	2.23306	P		NWMN_0953	cytochrome d ubiquinol oxidase subunit II	0.988483	0.745225	0.741292	SA0938	cydB	cydB	cytochrome d ubiquinol oxidase subunit II
NWMN_0868	adaptor protein	9929	16799	2154	7791	11114	5310	7986	7932	5772	1746	8464	5528	13364	9452.5	7959	5105	0.707311	0.595555	0.381996	O		NWMN_1908	hypothetical protein	0.639005	0.617766	0.741797		dnaD2	NWMN_1908	hypothetical protein
NWMN_0869	competence protein	209.1	250.9	61.19	177.3	188.2	83.17	143.9	140.2	60.13	198.9	141.6	47.45	230	182.75	142.05	170.25	0.794565	0.617609	0.740217	R		NWMN_0296	hypothetical protein	1.46101	0.8455	0.742016		-	NWMN_0296	hypothetical protein
NWMN_0870	oligoendopeptidase F	13051	30984	1151	12733	16809	1577	11878	28.02	2946	8299	15672	1275	22017.5	14771	5953.01	11985.5	0.670875	0.270376	0.544362	E		NWMN_0090	hypothetical protein	0.695646	0.645796	0.742721		-	NWMN_0090	hypothetical protein
NWMN_0872	hypothetical protein	5910	9111	3629	5709	7204	3795	4795	5084	2834	6632	4680	1857	7510.5	6456.5	4939.5	5656	0.859663	0.657679	0.753079	Q		NWMN_0335	hypothetical protein	0.804662	0.525915	0.742852	SA0330	ydaF	NWMN_0335	hypothetical protein
NWMN_0873	hypothetical protein	9930	13386	5972	9021	10513	6182	7723	7573	5157	10213	7453	3266	11658	9767	7648	8833	0.837794	0.65603	0.757677	R		NWMN_0397	superantigen-like protein	0.853565	0.893709	0.74308	SA0390	ssl10	set10nm	superantigen-like protein
NWMN_0874	hypothetical protein	3035	4928	2081	3411	3587	1622	2886	2791	2093	3909	2911	1189	3981.5	3499	2838.5	3410	0.878815	0.712922	0.856461	S		NWMN_0015	replicative DNA helicase	0.84127	0.660741	0.743915	SA0015	dnaC	dnaB	replicative DNA helicase
NWMN_0875	hypothetical protein	8577	10559	2550	8447	9196	3779	5262	4751	2448	7522	5171	1778	9568	8821.5	5006.5	6346.5	0.92198	0.523255	0.663305			NWMN_0419	hypothetical protein	0.876245	0.64826	0.744305	SA0412	-	NWMN_0419	hypothetical protein
NWMN_0876	GTP pyrophosphokinase	8172	9491	1078	6286	7236	3633	4485	167	2354	1266	4632	2123	8831.5	6761	2326	2949	0.765555	0.263375	0.333918	S		NWMN_2541	mannose-6-phosphate isomerase	0.860604	0.738096	0.74432	SA2435	pmi	NWMN_2541	mannose-6-phosphate isomerase
NWMN_0877	inorganic polyphosphate/ATP-NAD kinase	7058	8981.5	3715	5790.5	6692.5	3916.5	5461	4471.5	3172.5	5842	6174.5	2967	8019.75	6241.5	4966.25	6008.25	0.778266	0.619252	0.749182	G		NWMN_2124	cobalt transporter ATP-binding subunit	0.952651	0.581444	0.744498	SA2021	cbiO	cbiO	cobalt transporter ATP-binding subunit
NWMN_0878	RNA pseudouridylate synthase	2412	2747	1002	1678	2501	1238	1282	821.1	946.9	39.14	2023	960.8	2579.5	2089.5	1051.55	1031.07	0.810041	0.407657	0.399717	J		NWMN_0782	ABC transporter substrate-binding protein	0.736227	0.608944	0.74454	SA0771	metQ	NWMN_0782	ABC transporter substrate-binding protein
NWMN_0879	magnesium transporter	5761	6833	2869.5	4226.5	5838.5	3554.5	3252	3710	2709	5545	5336	2639	6297	5032.5	3481	5440.5	0.79919	0.552803	0.863983	P		NWMN_1667	mannosyl-glycoprotein endo-beta-N-acetylglucosamidase	1.11583	0.599891	0.744876	SA1593	-	NWMN_1667	mannosyl-glycoprotein endo-beta-N-acetylglucosamidase
NWMN_0880	monovalent cation/H+ antiporter-2 (CPA2)	6103	6750	3136	4270	6668	4238	3666	3984	2752	5499	6219	3122	6426.5	5469	3825	5859	0.851008	0.595192	0.911694	P		NWMN_0527	glycosyl transferase group 1	0.91256	0.667677	0.744892	SA0523	-	NWMN_0527	glycosyl transferase group 1
NWMN_0881	enoyl-(acyl carrier protein) reductase	13860	18844	7645	13046	14766	9424	12498	8624	7226	13960	14292	6077	16352	13906	10561	14126	0.850416	0.645854	0.86387	I		NWMN_2599	permease	0.928442	0.691921	0.745009	SA2493	vraE	vraE	permease
NWMN_0882	hypothetical protein	5898.5	6551	2597	5363.5	4896	2060	6347.5	4135.5	2278.5	7110.5	4603.5	1634.75	6224.75	5129.75	5241.5	5857	0.824089	0.842042	0.940921	R		NWMN_0178	inosine-uridine preferring nucleoside hydrolase	0.827543	0.748783	0.745427	SA0234	rihA	NWMN_0178	inosine-uridine preferring nucleoside hydrolase
NWMN_0883	Na+/alanine symporter	731.6	925.9	271.7	593.2	1025	392.4	398.7	442	171.3	547.8	533.7	127.4	828.75	809.1	420.35	540.75	0.97629	0.50721	0.652489	E		NWMN_1728	ABC transporter ATP-binding protein	0.861643	0.48161	0.745647	SA1655	ecsA	NWMN_1728	ABC transporter ATP-binding protein
NWMN_0884	hypothetical protein	942.7	1261	480.4	741	823.3	563.4	703.8	622.7	428.6	1181	749.7	329.5	1101.85	782.15	663.25	965.35	0.709852	0.601942	0.876117	P		NWMN_0779	hypothetical protein	0.66938	1.09632	0.745964	SAS023	-	NWMN_0779	hypothetical protein
NWMN_0885	hypothetical protein	14628	26720	10630	11814	15270	11689	17774	12546	12713	17769	14761	8472	20674	13542	15160	16265	0.655026	0.733288	0.786737	J		NWMN_1463	hypothetical protein	0.758848	0.779053	0.746228	SA1389	trmK	NWMN_1463	hypothetical protein
NWMN_0886	hypothetical protein	1183.5	1694.5	778.65	904.2	1475	756.95	1051.5	990.45	680.2	1188	1077	489.95	1439	1189.6	1020.98	1132.5	0.826685	0.709503	0.787005	G		NWMN_0102	capsular polysaccharide biosynthesis protein CapH	1.03551	0.956367	0.746231	SA0151	capH	capH	capsular polysaccharide biosynthesis protein CapH
NWMN_0887	diacylglycerol glucosyltransferase	3531.33	4999	1606.67	3166	3321.33	1482	2969.33	2350.67	1605	3439.67	2355.33	877.533	4265.17	3243.67	2660	2897.5	0.760502	0.623657	0.67934	M		NWMN_2567	intercellular adhesion protein B	0.688639	0.710083	0.746726	SA2461	icaB	icaB	intercellular adhesion protein B
NWMN_0888	UDP-N-acetylmuramoylalanyl-D-glutamate--2 6-diaminopimelate ligase	5816	6493	2468	5013	6181	3454	3729	3165	1917	5314	4444	1834	6154.5	5597	3447	4879	0.909416	0.560078	0.792753	M		NWMN_1508	acetyl-CoA carboxylase biotin carboxyl carrier protein	0.313741	0.447198	0.746972	SA1435	accB	accB	acetyl-CoA carboxylase biotin carboxyl carrier protein
NWMN_0889	hypothetical protein	4098	5587	2716	3820	5921	3911	3143	3218	2358	4454	4028	1792	4842.5	4870.5	3180.5	4241	1.00578	0.656789	0.875787			NWMN_1980	potassium-transporting ATPase C subunit	0.898559	0.660214	0.746979	SA1879	kdpC	kdpC	potassium-transporting ATPase C subunit
NWMN_0890	peptide chain release factor 3	448.4	615.3	345	317.8	551.8	360.3	567.8	451.4	369.6	598.8	505.2	288.3	531.85	434.8	509.6	552	0.817524	0.958165	1.03789	J		NWMN_1712	intracellular serine protease	0.683959	0.547677	0.747295		epiP	bsaP	intracellular serine protease
NWMN_0891	hypothetical protein	1300	1472	595.2	1146	1468	611.5	959.1	1149	546.1	1097	1511	524.3	1386	1307	1054.05	1304	0.943001	0.760498	0.940837	P		NWMN_0939	phosphoribosylaminoimidazole synthetase	0.819305	0.633247	0.747806	SA0923	purM	purM	phosphoribosylaminoimidazole synthetase
NWMN_0892	serine protease HtrA	2903	2181	1663	1325	1644	640.6	1482	1016	591.9	990.6	896.8	869.9	2542	1484.5	1249	943.7	0.583989	0.491345	0.371243	O		NWMN_1388	pyridine nucleotide-disulphide oxidoreductase	0.947117	0.582445	0.747854	SA1311	-	NWMN_1388	pyridine nucleotide-disulphide oxidoreductase
NWMN_0893	Na+ transporting ATP synthase	396.3	442.3	253.9	351.5	691.7	380.5	354.5	367.5	282.1	474.3	425.5	226.5	419.3	521.6	361	449.9	1.24398	0.860959	1.07298	P		NWMN_1047	heme-degrading monooxygenase IsdG	0.493533	0.624885	0.74801	SA0983	isdG	isdG	heme-degrading monooxygenase IsdG
NWMN_0894	5' nucleotidase	3227	4661	1469	2714	3051	1383	2410	2317	1318	4101	2697	1074	3944	2882.5	2363.5	3399	0.730857	0.599265	0.861815	F		NWMN_1060	succinate dehydrogenase cytochrome b-558 subunit	0.779977	0.703326	0.748082	SA0994	sdhC	sdhC	succinate dehydrogenase cytochrome b-558 subunit
NWMN_0895	competence transcription factor ComK-like protein	5822	20010	6843	718.1	2450	1446	2812	11126	8416	4723	13040	6496	12916	1584.05	6969	8881.5	0.122642	0.539563	0.687635	K		NWMN_2217	phosphosugar-binding transcriptional regulator RpiR	0.562019	0.787285	0.748115	SA2108	-	NWMN_2217	phosphosugar-binding transcriptional regulator RpiR
NWMN_0896	hypothetical protein	20028	23748	12179	21000	21687	28223	23498	21640	20483	35763	26834	19232	21888	21343.5	22569	31298.5	0.975123	1.03111	1.42994			NWMN_0097	capsular polysaccharide biosynthesis protein CapC	1.20166	1.11362	0.748388	SA0146	capC	capC	capsular polysaccharide biosynthesis protein CapC
NWMN_0897	lipoyltransferase and lipoate-protein ligase	2848.67	6350.33	931.6	3336.67	4713.67	665.6	2826.33	2825.67	889.667	3965.33	4433.67	678.933	4599.5	4025.17	2826	4199.5	0.875131	0.614415	0.913034	H		NWMN_0230	hypothetical protein	0.888781	0.719375	0.748549	SA0283	-	NWMN_0230	hypothetical protein
NWMN_0899	protease	931.843	1287	497.957	754.786	1456.29	787.271	945.686	808.157	628.729	1027.14	911.871	461.857	1109.42	1105.54	876.921	969.507	0.996498	0.790431	0.873885	R		NWMN_2179	molybdenum ABC transporter periplasmic molybdate-binding protein	0.878846	0.710376	0.748909	SA2074	modA	modA	molybdenum ABC transporter periplasmic molybdate-binding protein
NWMN_0900	hypothetical protein	197.1	428.7	43.33	161.5	254.5	50.65	237.7	9.053	52.82	77.31	141.7	29.13	312.9	208	123.376	109.505	0.664749	0.3943	0.349968			NWMN_1906	phi PVL orf 50-like protein	0.724985	0.66013	0.748919	NA		NWMN_1906	phi PVL orf 50-like protein
NWMN_0901	membrane protein	355.4	587.3	123.8	262	340.1	79.28	285	197.4	111.8	209.9	261.8	119.7	471.35	301.05	241.2	235.85	0.638697	0.511722	0.500371	J		NWMN_2304	hypothetical protein	1.06383	0.802656	0.749014	SA2192	-	NWMN_2304	hypothetical protein
NWMN_0902	hypothetical protein	407.643	370.914	230.829	179.443	237.171	243.571	338.886	188.629	230.029	225.129	176.886	167.957	389.279	208.307	263.757	201.007	0.535111	0.677554	0.516358	S		NWMN_0098	capsular polysaccharide biosynthesis protein CapD	1.33656	1.0304	0.749177	SA0147	capD	capD	capsular polysaccharide biosynthesis protein CapD
NWMN_0903	ABC transporter ATP-binding protein	721.6	524	317.7	309.1	575.8	435.7	377.2	129.9	312	330.6	381	286.3	622.8	442.45	253.55	355.8	0.710421	0.407113	0.571291	V		NWMN_0877	inorganic polyphosphate/ATP-NAD kinase	0.778266	0.619252	0.749182	SA0865	ppnK	ppnK	inorganic polyphosphate/ATP-NAD kinase
NWMN_0904	hypothetical protein	3113	4172	2294	2080	3565	4523	3560	2232	2946	2450	3585	3282	3642.5	2822.5	2896	3017.5	0.77488	0.795058	0.828415			NWMN_0259	hypothetical protein	0.864808	0.56823	0.749472	SA0306	rpiR	NWMN_0259	hypothetical protein
NWMN_0905	hypothetical protein	1730	2084	447.9	1479	1077	242.7	2528	1674	858.7	3139	1953	372.8	1907	1278	2101	2546	0.670163	1.10173	1.33508			NWMN_1272	oxacillin resistance-related FmtC protein	0.734912	0.539827	0.749838	SA1193	fmtC	fmtC	oxacillin resistance-related FmtC protein
NWMN_0906	glycosyl transferase group 1	1237.8	1424.4	436.633	879.067	852.133	267.433	1496.13	1155.13	471.3	1988.87	1207.2	336.9	1331.1	865.6	1325.63	1598.03	0.650289	0.995893	1.20054	M		NWMN_0218	secretory antigen SsaA-like protein	0.886694	0.698722	0.750145	SA0270	ssaA	NWMN_0218	secretory antigen SsaA-like protein
NWMN_0907	hypothetical protein	1065	1222	218.2	928.8	1216	241.7	976.7	644.1	395.6	767.1	1078	300.1	1143.5	1072.4	810.4	922.55	0.937822	0.708701	0.806777	S		NWMN_2342	2-dehydropantoate 2-reductase	0.845905	0.692384	0.750454	SA2232	panE	apbA	2-dehydropantoate 2-reductase
NWMN_0908	iron compound ABC transporter iron compound-binding protein	1051	1850	233.8	274.7	379.7	223	965.7	1019	760	1370	2360	978.7	1450.5	327.2	992.35	1865	0.225577	0.684143	1.28576	P		NWMN_1763	ABC transporter ATP-binding protein	0.722637	0.557552	0.750803	SA1688	tagH	NWMN_1763	ABC transporter ATP-binding protein
NWMN_0909	hypothetical protein	1740	2302	849.4	1181	1965	1096	1246	1161	849.2	1549	1292	728.8	2021	1573	1203.5	1420.5	0.778328	0.595497	0.70287	S		NWMN_0914	alpha/beta fold family hydrolase	0.76624	0.850524	0.751077	SA0897	menH	NWMN_0914	alpha/beta fold family hydrolase
NWMN_0910	acetyltransferase	3456	7160	2383	4370	5588	2491	3608	3827	2356	3384	3402	1673	5308	4979	3717.5	3393	0.938018	0.700358	0.639224	K		NWMN_2447	methylated-DNA--protein-cysteine methyltransferase	0.859427	0.908634	0.751096	SA2335	adaB	NWMN_2447	methylated-DNA--protein-cysteine methyltransferase
NWMN_0911	1,4-dihydroxy-2-naphthoate octaprenyltransferase	4576.2	4189.8	1929.8	3863.6	4783.8	3074.8	4050.6	2738.8	1814.2	5053.2	3595	1787	4383	4323.7	3394.7	4324.1	0.98647	0.774515	0.986562	H		NWMN_1621	serine protease HtrA	0.89483	0.651369	0.751589	SA1549	htrA1	NWMN_1621	serine protease HtrA
NWMN_0912	hypothetical protein	6583	8892	2706	5373	6829	3358	4759	244.8	2699	4798	4501	1957	7737.5	6101	2501.9	4649.5	0.788498	0.323347	0.600905	H		NWMN_2415	hypothetical protein	0.965187	0.716467	0.751774	SA2305	-	NWMN_2415	hypothetical protein
NWMN_0913	2-succinyl-6-hydroxy-2,4-cyclohexadiene-1-carboxylic acid synthase/2-oxoglutarate decarboxylase	17043	9940	8032	7909	9951	11659	11635	8718	6330	9492	7462	7254	13491.5	8930	10176.5	8477	0.661898	0.75429	0.628322	H		NWMN_1099	hypothetical protein	0.844079	0.635406	0.751802	SA1032	ylmF	NWMN_1099	hypothetical protein
NWMN_0914	alpha/beta fold family hydrolase	16649	17711	13091	11813	14515	15232	17471	11753	10308	14497	11310	11338	17180	13164	14612	12903.5	0.76624	0.850524	0.751077	R		NWMN_1075	superantigen-like protein	0.490552	0.834571	0.751907	SA1009	ssl12	NWMN_1075	superantigen-like protein
NWMN_0915	naphthoate synthase	3898.5	5209	3908.5	3657	4455.5	3477	6496.5	3885.5	3624.5	4945.5	4343.5	3471.5	4553.75	4056.25	5191	4644.5	0.890749	1.13994	1.01993	H		NWMN_0483	pyrimidine nucleoside transport protein	0.862322	0.606586	0.752028	SA0479	nupC	nupC	pyrimidine nucleoside transport protein
NWMN_0916	cysteine protease	3075	4915	3351	1531	2718	3564	3387	6464	7611	3623	7890	7926	3995	2124.5	4925.5	5756.5	0.53179	1.23292	1.44093			NWMN_0864	oligopeptide ABC transporter permease protein	0.863619	0.804611	0.752052	SA0853	appB	NWMN_0864	oligopeptide ABC transporter permease protein
NWMN_0917	cysteine protease	2460	3897	2637	1059	407.7	2460	2509	5733	5910	2644	6460	4567	3178.5	733.35	4121	4552	0.230722	1.29652	1.43212			NWMN_0727	excinuclease ABC subunit A	0.73124	0.732177	0.752797	SA0714	uvrA	uvrA	excinuclease ABC subunit A
NWMN_0918	glutamyl endopeptidase	2653.8	4831	2368.4	1236.88	2756	2348.4	2282.8	6499	6145.6	2046.2	8444.4	6170.6	3742.4	1996.44	4390.9	5245.3	0.533465	1.17328	1.40159	E		NWMN_0872	hypothetical protein	0.859663	0.657679	0.753079	SA0860	yjbM	NWMN_0872	hypothetical protein
NWMN_0919	aminotransferase class I	1893	3742	1034	1433	2485	1311	1591	2205	1022	2260	2269	647	2817.5	1959	1898	2264.5	0.695297	0.673647	0.803727	E		NWMN_0491	serine acetyltransferase	0.848334	0.54015	0.753392	SA0487	cysE	cysE	serine acetyltransferase
NWMN_0920	hypothetical protein	991.9	1443	409	980.9	1153	573.1	720.4	983.6	490.2	986	940.4	320.9	1217.45	1066.95	852	963.2	0.876381	0.699823	0.791162	G		NWMN_0758	extracellular matrix and plasma binding protein	0.65374	0.620997	0.753463	SA0744	ssp	ssp	extracellular matrix and plasma binding protein
NWMN_0921	MarR family transcriptional regulator	2977.5	5048	2373.5	1177	1782.5	1063.35	2081.1	2535.5	2122.35	3347	3253.5	1456	4012.75	1479.75	2308.3	3300.25	0.368762	0.575241	0.822441	K		NWMN_0378	xanthine phosphoribosyltransferase	0.82972	0.626233	0.753796	SA0373	xprT	NWMN_0378	xanthine phosphoribosyltransferase
NWMN_0922	bifunctional autolysin	19175.5	24793	13879	17217.5	32631	21426.5	10255	12506.5	9689	10502	13155	9125	21984.2	24924.2	11380.8	11828.5	1.13373	0.517677	0.538044	G		NWMN_2241	hypothetical protein	0.841043	0.775477	0.753835	SA2131	-	NWMN_2241	hypothetical protein
NWMN_0923	acetyltransferase GNAT	1932	2091	540	1463	2638	864.1	821.5	1242	504.3	1190	1233	343.2	2011.5	2050.5	1031.75	1211.5	1.01939	0.512926	0.602287	K		NWMN_1090	cell division protein	0.507915	0.620688	0.753979	SA1023	ftsL	ftsL	cell division protein
NWMN_0924	hypothetical protein	2189	3370	1626	1782	3124	2000	2098	2327	1606	2634	2838	1218	2779.5	2453	2212.5	2736	0.882533	0.796006	0.98435	R		NWMN_1484	Hsp-70 cofactor GrpE protein	0.671063	0.63096	0.754278	SA1410	grpE	grpE	Hsp-70 cofactor GrpE protein
NWMN_0925	hypothetical protein	4456.43	7263.71	2170	3845	5791.14	2655.71	3415.29	3356.71	1900.86	4696.86	4974.71	1651	5860.07	4818.07	3386	4835.79	0.822186	0.577809	0.825209	K		NWMN_0365	hypothetical protein	0.917153	1.10584	0.754588	SAS010	-	NWMN_0365	hypothetical protein
NWMN_0926	fmt protein	2035	1758	546.4	1570	1280	902.9	2103	1020	1095	1662	1560	1266	1896.5	1425	1561.5	1611	0.751384	0.823359	0.84946	V		NWMN_0563	hypothetical protein	0.517062	0.725574	0.754727		-	NWMN_0563	hypothetical protein
NWMN_0927	quinol oxidase subunit IV	3139	2286	3110	2578	3967	3471	5368	1999	2649	2348	2060	2422	2712.5	3272.5	3683.5	2204	1.20645	1.35797	0.812535	C		NWMN_0815	hypothetical protein	0.620878	0.514481	0.754773	SA0806	-	NWMN_0815	hypothetical protein
NWMN_0928	cytochrome c oxidase subunit III	54395.5	34434	43021.5	40838	47076	48968	64154	33681.5	35626.5	40755	30505	34769	44414.8	43957	48917.8	35630	0.989694	1.10139	0.802211	C		NWMN_1691	hypothetical protein	0.546666	0.637813	0.755751	SA1620	-	NWMN_1691	hypothetical protein
NWMN_0929	quinol oxidase subunit I	65177	65151	64286	65182	65180	65178	65153	60029	49789	65173	65173	65174	65164	65181	62591	65173	1.00026	0.960515	1.00014	C		NWMN_1230	cardiolipin synthetase	0.855143	0.573367	0.7559	SA1155	cls1	NWMN_1230	cardiolipin synthetase
NWMN_0930	quinol oxidase AA3 subunit II	65176.5	63447.5	57727.5	63372	65178.5	65180	65149	53722.5	56632	61595.5	57990.5	61952.5	64312	64275.2	59435.8	59793	0.999429	0.924178	0.929733	C		NWMN_1938	co-chaperonin GroES	0.911907	0.648766	0.755964	SA1837	groES	groES	co-chaperonin GroES
NWMN_0931	hypothetical protein	15791	21514	8734	13759	16535	9622	19334	14728	16334	23027	22839	12679	18652.5	15147	17031	22933	0.812063	0.913068	1.22949			NWMN_1042	iron-regulated cell surface protein	0.320404	0.585358	0.755992	SA0978	isdC	isdC	iron-regulated cell surface protein
NWMN_0932	FolD bifunctional protein	13564	9259	11618	12530	14381	8408	18929	13689	10860	15784	18326	9948	11411.5	13455.5	16309	17055	1.17912	1.42917	1.49454	H		NWMN_0972	hypothetical protein	0.572888	0.585331	0.756103	SA0957	-	NWMN_0972	hypothetical protein
NWMN_0933	phosphoribosylaminoimidazole carboxylase catalytic subunit	3771.5	4616.5	1874.5	3757.5	5417	3384	2161.5	2355.5	1403	3125.5	2334.5	1051.55	4194	4587.25	2258.5	2730	1.09376	0.538507	0.65093	F		NWMN_1138	fatty acid biosynthesis transcriptional regulator	0.826491	0.395729	0.756822	SA1071	fapR	NWMN_1138	fatty acid biosynthesis transcriptional regulator
NWMN_0934	phosphoribosylaminoimidazole carboxylase ATPase subunit	4685	5742	2273	4253	6264	3873	2631	2716	1703	3569	2759	1259	5213.5	5258.5	2673.5	3164	1.00863	0.512803	0.606886	F		NWMN_0736	ATP-dependent Clp protease proteolytic subunit ClpP	0.901025	1.03776	0.756992	SA0723	clpP	clpP	ATP-dependent Clp protease proteolytic subunit ClpP
NWMN_0935	phosphoribosylaminoimidazole-succinocarboxamide synthase	4070	5602	2463	4423	5773	3505	2971	3061	1909	3519	3273	1553	4836	5098	3016	3396	1.05418	0.623656	0.702233	F		NWMN_2081	hypothetical protein	0.682249	0.496395	0.757153	SA1982	-	NWMN_2081	hypothetical protein
NWMN_0936	phosphoribosylformylglycinamidine synthase I	2409	2484	1186.86	1649.29	2604.86	1379.86	1433.29	1421.71	916.343	1654.86	1589	842.1	2446.5	2127.07	1427.5	1621.93	0.869434	0.583487	0.662959	F		NWMN_2331	glycerate kinase	1.47504	0.61462	0.757228	SA2220	glxK	NWMN_2331	glycerate kinase
NWMN_0937	phosphoribosylformylglycinamidine synthase II	3956	3021	1901	2475	4341	3096	2534	2451	1840	2590	2367	1778	3488.5	3408	2492.5	2478.5	0.976924	0.71449	0.710477	F		NWMN_0262	lipase	0.767422	0.592088	0.757288	SA0309	geh	geh	lipase
NWMN_0938	amidophosphoribosyltransferase	2625	2151	1690	1828	3057	2484	1764	1682	1498	2034	2098	1588	2388	2442.5	1723	2066	1.02282	0.721524	0.865159	F		NWMN_2351	general substrate transporter involved in chloramphenicol resistance	0.632751	1.16052	0.757402	SA2241	-	NWMN_2351	general substrate transporter involved in chloramphenicol resistance
NWMN_0939	phosphoribosylaminoimidazole synthetase	3028.5	3125.5	2115.5	1869	3173	2938.5	2006	1891	1633	2276.5	2325.5	1819.5	3077	2521	1948.5	2301	0.819305	0.633247	0.747806	F		NWMN_0200	6-phospho-beta-glucosidase	0.799384	0.801111	0.757525	SA0256	bglA	bglA	6-phospho-beta-glucosidase
NWMN_0940	phosphoribosylglycinamide formyltransferase	7638	7199	4739	4029	6923	7153	4338	3973	3877	4958	4385	3992	7418.5	5476	4155.5	4671.5	0.738155	0.560154	0.62971	F		NWMN_0521	hydrolase haloacid dehalogenase-like	0.727323	0.618401	0.757621	SA0517	-	NWMN_0521	hydrolase haloacid dehalogenase-like
NWMN_0941	bifunctional phosphoribosylaminoimidazolecarboxamide formyltransferase/IMP cyclohydrolase	5787.29	5290.57	2349	3107.57	5055.29	4856.86	3419.86	1798.46	2590	2220.43	3263.43	3063.29	5538.93	4081.43	2609.16	2741.93	0.736862	0.471058	0.495029	F		NWMN_2222	sodium/bile acid symporter	0.991878	0.61688	0.757631	SA2112	yocS	NWMN_2222	sodium/bile acid symporter
NWMN_0942	phosphoribosylamine--glycine ligase	2233	1934	1682	1479	2591	1977	2473	1566	1454	1982	1803	1319	2083.5	2035	2019.5	1892.5	0.976722	0.969282	0.908327	F		NWMN_0873	hypothetical protein	0.837794	0.65603	0.757677	SA0861	hbo	NWMN_0873	hypothetical protein
NWMN_0943	cobalt transport	10289	11692	2720	4233	8459	3550	4685	171.4	3341	51.64	8604	3792	10990.5	6346	2428.2	4327.82	0.577408	0.220936	0.393778	P		NWMN_1336	hypothetical protein	0.734573	0.740964	0.758349	SA1258	-	NWMN_1336	hypothetical protein
NWMN_0944	hypothetical protein	44444	39951	20650	23070	32707	21302	25376	29703	20078	42464	43327	26673	42197.5	27888.5	27539.5	42895.5	0.660904	0.652633	1.01654	P		NWMN_1078	ornithine carbamoyltransferase	0.677273	0.690234	0.75854	SA1012	argF	argF	ornithine carbamoyltransferase
NWMN_0945	hypothetical protein	29548	33616	12769	16835	23948	9839	20002	20385	14003	32938	34807	17547	31582	20391.5	20193.5	33872.5	0.645668	0.639399	1.07253	S		NWMN_0595	monovalent cation/H+ antiporter subunit C	0.59104	0.803397	0.759334	SA0580	mnhC	mnhC	monovalent cation/H+ antiporter subunit C
NWMN_0946	hypothetical protein	4458	2851	2765	1738	2756	3025	4366	2878	2894	3257	1966	1958	3654.5	2247	3622	2611.5	0.614858	0.991107	0.714598			NWMN_1608	hypothetical protein	0.942778	0.66925	0.759694	SA1536	-	NWMN_1608	hypothetical protein
NWMN_0947	hypothetical protein	7171.14	8864	3496.29	6314.14	7026.29	4145.71	5016	4604.86	2899.86	8536.29	6144	2848.71	8017.57	6670.21	4810.43	7340.14	0.831949	0.599986	0.915507	R		NWMN_2425	hypothetical protein	0.863014	0.522551	0.75972	SA2315	-	NWMN_2425	hypothetical protein
NWMN_0948	hypothetical protein	14088	8190	8455	6534	7260	8720	17703	6469	7781	9727	5662	6942	11139	6897	12086	7694.5	0.619176	1.08502	0.690771			NWMN_0231	hypothetical protein	0.916839	0.657918	0.759805	SA0284	-	NWMN_0231	hypothetical protein
NWMN_0949	phosphocarrier protein HPr	24304.5	27183.5	25382.5	23143	20962.5	19712	40574.5	22954	22774	27875	25966	21774.5	25744	22052.8	31764.2	26920.5	0.856617	1.23385	1.0457	G		NWMN_1559	DNA-3-methyladenine glycosidase	0.706345	0.585366	0.76047	SA1489	tag	NWMN_1559	DNA-3-methyladenine glycosidase
NWMN_0950	phosphoenolpyruvate-protein phosphotransferase	14266	15705	12783	11095	12735	12292	20115	12166	11819	14704	11167	9128	14985.5	11915	16140.5	12935.5	0.795102	1.07707	0.863201	G		NWMN_0323	hypothetical protein	0.900839	0.683028	0.760908	SA0319	-	NWMN_0323	hypothetical protein
NWMN_0951	glutaredoxin	299.9	419.2	138.75	294	387.25	170.6	309.8	247.9	202.5	387.75	309.55	109.1	359.55	340.625	278.85	348.65	0.947365	0.775553	0.969684	O		NWMN_1924	hypothetical protein	0.579821	0.651435	0.760968		hlb	NWMN_1924	hypothetical protein
NWMN_0952	cytochrome d ubiquinol oxidase subunit I	3014	1152	1238	1755	2298	2988	1300	1245	1194	1391	1605	1352	2083	2026.5	1272.5	1498	0.972876	0.610898	0.719155	C		NWMN_2516	citrate transporter	0.818474	0.728636	0.761173	SA2411	citM	NWMN_2516	citrate transporter
NWMN_0953	cytochrome d ubiquinol oxidase subunit II	2511	1049	1294	1577	1942	2742	1680	973	1096	1190	1449	1330	1780	1759.5	1326.5	1319.5	0.988483	0.745225	0.741292	C		NWMN_0391	superantigen-like protein	0.856583	0.697766	0.761638	SA0385	ssl4	set4nm	superantigen-like protein
NWMN_0954	TrkA potassium uptake	17378	13215.5	8571.5	11169	12806.5	13252.5	12065.5	5308	8668.5	11360.5	9531	8159	15296.8	11987.8	8686.75	10445.8	0.78368	0.567882	0.682874	P		NWMN_0023	cassette chromosome attachment site ORF	0.672889	0.734832	0.761773	SA0023	orfX	orfX	cassette chromosome attachment site ORF
NWMN_0956	hypothetical protein	15863.5	21912.5	6855.5	12049.5	16486.5	5950.5	13418	14285.5	6810.5	16615	16451.5	5727	18888	14268	13851.8	16533.2	0.7554	0.733362	0.875331	R		NWMN_0533	hexulose-6-phosphate synthase	0.829113	1.25263	0.762145	SA0528	hxlA	NWMN_0533	hexulose-6-phosphate synthase
NWMN_0957	peptide deformylase	834.55	1298.65	405.2	902.05	1458	382.45	959.2	1131.15	428.85	1032.25	1016.1	310.4	1066.6	1180.03	1045.18	1024.17	1.10634	0.979913	0.960224	J		NWMN_1472	diacylglycerol kinase	0.782061	0.659057	0.762184	SA1398	dgkA	NWMN_1472	diacylglycerol kinase
NWMN_0958	hypothetical protein	3818	6656	1417	5332	5799	1781	4015	3794	1779	5285	4810	1304	5237	5565.5	3904.5	5047.5	1.06273	0.74556	0.963815			NWMN_2427	acetyltransferase GNAT	0.780446	0.624054	0.762276	SA2317	pat	NWMN_2427	acetyltransferase GNAT
NWMN_0959	pyruvate dehydrogenase complex E1 component alpha subunit	35006	33276.1	17282.6	24727.6	34274.9	23645.3	21733.3	23723.7	15494.1	25694.9	26958.7	20151.6	34141.1	29501.2	22728.5	26326.8	0.864097	0.665723	0.771118	C		NWMN_1561	glutamate-1-semialdehyde aminotransferase	0.863905	0.648538	0.762764	SA1491	hemL	hemL	glutamate-1-semialdehyde aminotransferase
NWMN_0960	pyruvate dehydrogenase complex E1 component pyruvate dehydrogenase beta subunit	65176	64453	37443	50082	65179	47750	40575	32291	27786	15359	56021	35264	64814.5	57630.5	36433	35690	0.889161	0.562112	0.550648	C		NWMN_0535	hydrolase haloacid dehalogenase-like	0.491999	0.50728	0.762914	SA0530	-	NWMN_0535	hydrolase haloacid dehalogenase-like
NWMN_0961	branched-chain alpha-keto acid dehydrogenase subunit E2	47635	47007	10752	40139	43658	29452	35169	15243	21490	14994	42487	28612	47321	41898.5	25206	28740.5	0.88541	0.53266	0.607352	C		NWMN_1685	o-succinylbenzoic acid synthetase	0.70455	0.619747	0.762974	SA1614	menC	menC	o-succinylbenzoic acid synthetase
NWMN_0962	dihydrolipoamide dehydrogenase	18070	18933	14509	11994	18238	14318	19066	15857	12813	15464	16544	12181	18501.5	15116	17461.5	16004	0.817015	0.943788	0.865011	C		NWMN_1966	isopropylmalate isomerase small subunit	0.528126	0.57334	0.76308	SA1865	leuD	leuD	isopropylmalate isomerase small subunit
NWMN_0963	hypothetical protein	2258	2343	925.9	1730	2610	1528	1721	1606	1303	2604	2160	1193	2300.5	2170	1663.5	2382	0.943273	0.723104	1.03543	S		NWMN_1064	hypothetical protein	0.935776	0.666295	0.763242	SA0998	rdgB	NWMN_1064	hypothetical protein
NWMN_0964	Cro/CI family transcriptional regulator	804.2	761	207.8	608.5	323	194.5	653.1	336.9	207.4	1273	580.8	312.5	782.6	465.75	495	926.9	0.595132	0.632507	1.18439	K		NWMN_0519	deoxynucleoside kinase	0.791354	0.595832	0.763429	SA0515	dgk	NWMN_0519	deoxynucleoside kinase
NWMN_0965	ABC transporter	842.8	546.1	125.2	18.46	372	258.1	726.2	174.4	276.1	40.71	252	394.7	694.45	195.23	450.3	146.355	0.281129	0.648427	0.21075	E		NWMN_0436	glutamate synthase large subunit	0.727621	0.620225	0.763613	SA0430	gltB	gltB	glutamate synthase large subunit
NWMN_0966	spermidine/putrescine ABC transporter permease protein	1177	690.8	455.7	632.5	545.2	468.4	910.4	461	459.2	1379	900.3	649.2	933.9	588.85	685.7	1139.65	0.630528	0.734233	1.22031	E		NWMN_0127	bifunctional ornithine acetyltransferase/N-acetylglutamate synthase protein	0.715568	0.605041	0.763623	SA0177	argJ	argJ	bifunctional ornithine acetyltransferase/N-acetylglutamate synthase protein
NWMN_0967	spermidine/putrescine ABC transporter permease protein	1105	634.4	497.7	588.8	551.3	567.6	798.7	510.5	516.8	1339	837.7	743.4	869.7	570.05	654.6	1088.35	0.655456	0.752673	1.25141	E		NWMN_0056	staphylococcal accessory regulator S	0.571776	0.743444	0.76363	SA0108	sarH1	sarH1	staphylococcal accessory regulator S
NWMN_0968	spermidine/putrescine ABC transporter spermidine/putrescine-binding protein	3412	1334	1703	1087	1375	2311	2201	1253	1760	2416	1715	1874	2373	1231	1727	2065.5	0.518753	0.727771	0.870417	E		NWMN_1245	amino acid permease	0.833242	0.600073	0.763676	SA1169	lysP2	NWMN_1245	amino acid permease
NWMN_0969	hypothetical protein	45104.1	48261.7	46825.9	32790.1	43069.1	43731.4	47139.1	46068.4	49649.4	46007.9	49078.7	51850.3	46682.9	37929.6	46603.8	47543.3	0.812495	0.998305	1.01843			NWMN_0495	hypothetical protein	0.714638	0.619885	0.764109	SA0491	-	NWMN_0495	hypothetical protein
NWMN_0970	hypothetical protein	3726	6369	2461	3764	4634	2206	3670	4037	3252	4985	5086	1839	5047.5	4199	3853.5	5035.5	0.831897	0.763447	0.997623			NWMN_0594	monovalent cation/H+ antiporter subunit B	0.625787	0.839932	0.764351	SA0579	mnhB	mnhB	monovalent cation/H+ antiporter subunit B
NWMN_0971	Mn2+/Fe2+ transporter NRAMP	19479	19296	4514	16886	15276	5564	14143	12721	5474	24855	11127	3119	19387.5	16081	13432	17991	0.829452	0.692818	0.927969	P		NWMN_2237	ribose 5-phosphate isomerase	0.869009	0.869691	0.764855	SA2127	rpiA	rpi	ribose 5-phosphate isomerase
NWMN_0972	hypothetical protein	6281.14	11836.6	1669.57	4932.29	5447.14	849.143	5711.29	4893.57	1592.14	6566.86	7132	952.171	9058.86	5189.71	5302.43	6849.43	0.572888	0.585331	0.756103	S		NWMN_0484	transcription repressor of class III stress genes	0.741345	0.586278	0.765061	SA0480	ctsR	ctsR	transcription repressor of class III stress genes
NWMN_0973	inositol monophosphatase	17100.4	20143.3	9958	12620.1	19009.4	16651	11199.9	11491.9	9763.86	17592	14361.7	10285.4	18621.9	15814.8	11345.9	15976.9	0.849259	0.609276	0.857963	G		NWMN_2387	hydrolase	0.874359	0.635328	0.7651	SA2278	mutT	NWMN_2387	hydrolase
NWMN_0974	GTP-binding protein TypA	886.1	845	359	636.2	670.5	362.2	766.3	497.7	320.7	1076	729.2	285.5	865.55	653.35	632	902.6	0.754838	0.730172	1.04281	T		NWMN_1442	shikimate kinase	0.908726	0.42937	0.765114	SA1368	aroK	NWMN_1442	shikimate kinase
NWMN_0975	hypothetical protein	1488.29	2366	840.357	1219.24	1893.86	1104.57	1654.86	1405.29	1056.26	1921.14	1635.43	717.814	1927.14	1556.55	1530.07	1778.29	0.807698	0.793958	0.922758	S		NWMN_1444	hypothetical protein	0.787027	0.753674	0.765263	SA1370	comGE	NWMN_1444	hypothetical protein
NWMN_0976	hypothetical protein	1490.62	2463.12	731.225	1284.28	1932.75	916.462	1757.12	607.862	843.05	874.2	1547	550.65	1976.88	1608.51	1182.49	1210.6	0.813664	0.598163	0.612381			NWMN_0146	RGD-containing lipoprotein	0.7846	0.813337	0.765688	SA0201	rlp	rlp	RGD-containing lipoprotein
NWMN_0977	hypothetical protein	3130.29	3559.71	2334.86	3538	3028.86	1755.43	6534.86	3862	3153.43	4984.29	4032.71	2087.29	3345	3283.43	5198.43	4508.5	0.981593	1.55409	1.34783	S		NWMN_0841	coenzyme A disulfide reductase	0.76799	0.712932	0.765794	SA0831	cdr	cdr	coenzyme A disulfide reductase
NWMN_0978	cell division protein	4784	7207	1919	4071	5101	1625	4068	3942	2098	5301	4668	1248	5995.5	4586	4005	4984.5	0.764907	0.668001	0.831374	D		NWMN_1082	exfoliative toxin A	0.635517	0.605122	0.765861	SA1016	eta	eta	exfoliative toxin A
NWMN_0979	pyruvate carboxylase	7996.43	10775.6	5558.71	6468	12039.3	5844.43	4796.14	6445.29	4968.86	6405	8440.43	3942.43	9386	9253.64	5620.71	7422.71	0.985898	0.59884	0.790828	C		NWMN_0766	hypothetical protein	0.453047	0.560865	0.765916	SA0751	-	NWMN_0766	hypothetical protein
NWMN_0980	heme A synthase	2660	1518	1385	2320	2333	1764	2648	1442	1514	2525	1534	1128	2089	2326.5	2045	2029.5	1.11369	0.978937	0.971517	O		NWMN_0496	hypothetical protein	0.61349	0.601616	0.766172	SA0492	sigH	NWMN_0496	hypothetical protein
NWMN_0981	protoheme IX farnesyltransferase	13073	7484	4528	6416	8572	5512	7159	6615	4294	8425	6414	3510	10278.5	7494	6887	7419.5	0.729095	0.670039	0.721847	O		NWMN_1470	GTP-binding protein Era	0.729751	0.79895	0.766192	SA1396	era	era	GTP-binding protein Era
NWMN_0982	hypothetical protein	17390	12100	7234	11769	13075	8264	11317	9843	6509	12294	12014	5899	14745	12422	10580	12154	0.842455	0.717531	0.824279	S		NWMN_0559	hypothetical protein	0.649322	0.752299	0.766699	SA0553	-	NWMN_0559	hypothetical protein
NWMN_0983	hypothetical protein	7291	12096	4099	5660	9657	5341	6203	6985	4634	7766	8254	3325	9693.5	7658.5	6594	8010	0.790066	0.68025	0.826327	S		NWMN_2037	aminobenzoyl-glutamate utilization protein B	0.82489	0.643014	0.767149	SA1935	hmrA	NWMN_2037	aminobenzoyl-glutamate utilization protein B
NWMN_0984	glycerophosphoryl diester phosphodiesterase	3158.29	4103.86	1411.29	2643	4196	1498.57	2537	1558.66	1289.14	3550.29	3085.14	1047.14	3631.07	3419.5	2047.83	3317.71	0.941733	0.563974	0.913701	C		NWMN_0493	hypothetical protein	0.705159	0.573392	0.76777	SA0489	cysS	NWMN_0493	hypothetical protein
NWMN_0985	hypothetical protein	2716.71	3151.57	762.714	2940.43	2541.29	831.114	1915	1696.86	865.714	2967.71	1764.43	498.371	2934.14	2740.86	1805.93	2366.07	0.934125	0.615488	0.806393	S		NWMN_2579	hypothetical protein	0.700317	0.736979	0.768442	SA2473	-	NWMN_2579	hypothetical protein
NWMN_0986	hypothetical protein	1033	1214	356.5	811.6	902.4	327.1	702.7	671.6	359.2	1340	819.4	275.3	1123.5	857	687.15	1079.7	0.762795	0.611615	0.961015			NWMN_0704	ABC transporter ATP-binding protein	0.434862	0.746038	0.768476	SA0690	sstC	NWMN_0704	ABC transporter ATP-binding protein
NWMN_0987	hypothetical protein	1068	1235	463.2	1135	1195	597	803.8	885.3	592.9	1687	1060	457.7	1151.5	1165	844.55	1373.5	1.01172	0.733435	1.19279	L		NWMN_1231	ABC transporter ATP-binding protein	0.657829	0.602259	0.768892	SA1156	-	NWMN_1231	ABC transporter ATP-binding protein
NWMN_0988	pantetheine-phosphate adenylyltransferase	1215	1318	525.5	1175	1255	687.5	1031	736	557.1	1504	982.9	452.8	1266.5	1215	883.5	1243.45	0.959337	0.697592	0.9818	H		NWMN_0266	hypothetical protein	0.709872	0.596784	0.769065		-	NWMN_0266	hypothetical protein
NWMN_0989	hypothetical protein	1393	1965	475	916.1	1333	735.5	1170	985.7	506.5	1243	934	312.3	1679	1124.55	1077.85	1088.5	0.669774	0.641959	0.648303	R		NWMN_0120	hypothetical protein	0.676269	0.887556	0.770909	SA0170	-	NWMN_0120	hypothetical protein
NWMN_0990	hypothetical protein	11044	12272	3901	9989	11346	4690	9275	7364	4336	13824	10047	4494	11658	10667.5	8319.5	11935.5	0.915037	0.71363	1.0238	R		NWMN_0757	secreted von Willebrand factor-binding protein VWbp	0.605309	0.880419	0.770947	SA0743	graB	NWMN_0757	secreted von Willebrand factor-binding protein VWbp
NWMN_0991	50S ribosomal protein L32	14353.5	19291.5	5099.5	11949.5	17797	8265	15659.5	11789.5	7277	16244	14667.5	5944	16822.5	14873.2	13724.5	15455.8	0.884128	0.815842	0.918755	J		NWMN_0820	CPA3 family monovalent cation:proton (H+) antiporter-3 subunit C (mnhC2)	0.778604	0.596641	0.771105	SA0811	mnhC	mnhC	CPA3 family monovalent cation:proton (H+) antiporter-3 subunit C (mnhC2)
NWMN_0992	integrase	704.1	437.6	232.1	323.4	353.3	331	494.9	258.6	238	520.1	324	254.4	570.85	338.35	376.75	422.05	0.592713	0.659981	0.739336	L		NWMN_0959	pyruvate dehydrogenase complex E1 component alpha subunit	0.864097	0.665723	0.771118	SA0943-1	pdhA	phdA	pyruvate dehydrogenase complex E1 component alpha subunit
NWMN_0994	phage cI-like repressor	7711	9902	4395	6367	6915	3159	6605	5449	3502	9217	6630	2714	8806.5	6641	6027	7923.5	0.754102	0.684381	0.899733	K		NWMN_1715	lantibiotic epidermin biosynthesis protein EpiB	0.830313	0.659345	0.771554		bsaB	bsaB	lantibiotic epidermin biosynthesis protein EpiB
NWMN_0995	bacteriophage L54a antirepressor	1450	1603	693.7	1241	2153	1680	545.9	760.5	619	715.3	795.5	493.5	1526.5	1697	653.2	755.4	1.11169	0.427907	0.494858	K		NWMN_0566	hypothetical protein	0.562543	0.793583	0.771627		-	NWMN_0566	hypothetical protein
NWMN_0996	hypothetical protein	1532	1178	240.2	838.3	1407	1094	467.2	385.8	416.6	74.49	471.1	439	1355	1122.65	426.5	272.795	0.828524	0.31476	0.201325			NWMN_2583	hypothetical protein	0.678437	0.650529	0.771708	SA2477	mtsA	NWMN_2583	hypothetical protein
NWMN_0998	hypothetical protein	1540	1105	553.4	936.3	1652	1312	506.6	625	481.2	477.1	581.5	459.3	1322.5	1294.15	565.8	529.3	0.978563	0.427826	0.400227			NWMN_0734	hypothetical protein	0.72561	0.978994	0.772609	SA0721	-	NWMN_0734	hypothetical protein
NWMN_0999	hypothetical protein	1191	998.2	464.1	728.4	1221	1175	436.1	542.7	365.6	415	480.7	329.9	1094.6	974.7	489.4	447.85	0.890462	0.447104	0.409145	L		NWMN_0659	anion transporter	0.743125	0.692119	0.773083	SA0645	-	NWMN_0659	anion transporter
NWMN_1038	phage holin	231.9	239.6	131.6	151.8	333.8	319.2	65.04	148.6	108.7	68.27	120.5	99.36	235.75	242.8	106.82	94.385	1.0299	0.453107	0.400361	S		NWMN_1167	elongation factor Ts	0.753296	0.74221	0.773533	SA1100	tsf	tsf	elongation factor Ts
NWMN_1039	phage protein	607.4	461.3	341.1	348.5	673.4	738.1	467.7	293.4	246.3	100.7	249.8	282.3	534.35	510.95	380.55	175.25	0.956208	0.712174	0.327969	M		NWMN_1218	hypothetical protein	0.355919	0.494523	0.77394		-	NWMN_1218	hypothetical protein
NWMN_1040	neurofilament protein	452.8	857.9	275.1	289.5	532.4	231.3	279.5	331.7	208.6	470.9	580.2	206.7	655.35	410.95	305.6	525.55	0.62707	0.466316	0.801938	M		NWMN_0101	capsular polysaccharide biosynthesis protein CapG	1.21679	1.06384	0.773984	SA0150	capG	capG	capsular polysaccharide biosynthesis protein CapG
NWMN_1041	iron-regulated heme-iron binding protein IsdA	1982	4266.45	1610.36	1561.04	2442.27	662.564	2868.27	2238.64	1421.45	2839.18	3257.09	888.873	3124.23	2001.65	2553.45	3048.14	0.640688	0.817308	0.975645	M		NWMN_0173	ABC transporter substrate-binding protein	0.767098	1.04375	0.774029	SA0229	-	NWMN_0173	ABC transporter substrate-binding protein
NWMN_1042	iron-regulated cell surface protein	432.114	1113.97	217.543	198.214	297.157	107.749	479.729	425.286	208.829	599.1	569.729	166.671	773.043	247.686	452.507	584.414	0.320404	0.585358	0.755992	M		NWMN_1389	elastin binding protein	0.672477	0.92612	0.774397	SA1312	ebpS	ebpS	elastin binding protein
NWMN_1043	hypothetical protein	336.2	1030	186.3	190.3	268.2	93.26	255.7	166.4	143.8	196.2	517.8	154.6	683.1	229.25	211.05	357	0.335602	0.308959	0.522617			NWMN_1985	DEAD-box ATP dependent DNA helicase	0.819131	0.682048	0.774503	SA1885	cshA	NWMN_1985	DEAD-box ATP dependent DNA helicase
NWMN_1044	iron compound ABC transporter	365.1	987.1	234.7	188.7	246.3	110.8	276.3	324.2	212.5	546.6	536.3	185.7	676.1	217.5	300.25	541.45	0.321698	0.444091	0.800843	P		NWMN_0593	monovalent cation/H+ antiporter subunit A	0.655741	1.04997	0.774611	SA0578	mnhA	mnhA	monovalent cation/H+ antiporter subunit A
NWMN_1045	iron compound ABC transporter permease protein	1205.57	1632.43	370.786	520.157	596.8	389.943	844.814	636.643	453.671	818.914	886.814	439.6	1419	558.479	740.729	852.864	0.393572	0.522007	0.601032	P		NWMN_1146	hypothetical protein	0.657088	0.58722	0.774789	SA1079	-	NWMN_1146	hypothetical protein
NWMN_1046	NPQTN-specific sortase B	588.871	858.714	190.731	256.757	332.186	141.657	392.914	259.801	201.986	337.124	384.886	142.929	723.793	294.471	326.358	361.005	0.406845	0.450899	0.498768	S		NWMN_1990	hypothetical protein	0.921482	0.777716	0.775781	SA1889	-	NWMN_1990	hypothetical protein
NWMN_1047	heme-degrading monooxygenase IsdG	698.9	990.45	411.45	558.65	275.1	273.25	565.25	490.4	321.85	633.85	629.8	282.3	844.675	416.875	527.825	631.825	0.493533	0.624885	0.74801	R		NWMN_0151	multiple sugar-binding transport ATP-binding protein	0.829707	0.64472	0.775943	SA0206	msmX	NWMN_0151	multiple sugar-binding transport ATP-binding protein
NWMN_1048	SpoU rRNA methylase	1506.2	1631.57	754.829	1547.29	1303.71	552.171	1898	956.014	590.571	1960.29	1160.69	484.757	1568.89	1425.5	1427.01	1560.49	0.908607	0.909567	0.994646	J		NWMN_1407	NUDIX domain-containing protein	0.821658	0.607022	0.775967	SA1330	nudF	NWMN_1407	NUDIX domain-containing protein
NWMN_1049	phenylalanyl-tRNA synthetase subunit alpha	2728	3178	1366	1936	2381	1492	2265	1837	1507	2848	2530	1492	2953	2158.5	2051	2689	0.730952	0.694548	0.910599	J		NWMN_0325	BglG family transcriptional antiterminator	1.00896	0.596364	0.776554	SA0321	-	NWMN_0325	BglG family transcriptional antiterminator
NWMN_1050	phenylalanyl-tRNA synthetase beta subunit	3070	3279	1884	1779	2601	2010	2232	2089	1881	3067	2937	2207	3174.5	2190	2160.5	3002	0.689872	0.68058	0.945661	J		NWMN_1467	CBS domain-containing protein	0.926396	0.63445	0.776602	SA1393	ccpN	NWMN_1467	CBS domain-containing protein
NWMN_1051	ribonuclease HIII	952.4	1003	289	859.8	900.1	280.5	683.6	43.94	287.6	999.7	620.1	234	977.7	879.95	363.77	809.9	0.90002	0.372067	0.828373	L		NWMN_2385	hypothetical protein	0.774578	0.572542	0.77696	SA2275	-	NWMN_2385	hypothetical protein
NWMN_1053	hypothetical protein	1701	1454	686.8	1647	1219	617	1668	875.2	791.8	1906	1144	583.6	1577.5	1433	1271.6	1525	0.908399	0.806086	0.966719	S		NWMN_2560	acetyltransferase GNAT	0.890085	0.634074	0.776964	SA2454	-	NWMN_2560	acetyltransferase GNAT
NWMN_1054	hypothetical protein	882.6	688.3	321.8	786.1	604.3	353.3	795.6	474.5	395.5	1312	571.9	295.3	785.45	695.2	635.05	941.95	0.885098	0.808517	1.19925	R		NWMN_2306	Zn-binding lipoprotein adcA-like protein	0.64882	0.987331	0.777081	SA2194	zinT	NWMN_2306	Zn-binding lipoprotein adcA-like protein
NWMN_1055	hypothetical protein	1820	1265	677.1	1241	1113	908.6	1260	762.5	587.1	1978	1091	753.6	1542.5	1177	1011.25	1534.5	0.763047	0.655592	0.994814	E		NWMN_2356	lipoprotein	0.723647	0.757937	0.777371	SA2247	-	NWMN_2356	lipoprotein
NWMN_1056	recombination and DNA strand exchange inhibitor protein	1364	1238	676.1	1081	1212	876.8	1000	916.7	644.5	1604	1290	947.3	1301	1146.5	958.35	1447	0.881245	0.736626	1.11222	L		NWMN_0345	hypothetical protein	0.969448	0.75508	0.777721	SA0341	ltrA	NWMN_0345	hypothetical protein
NWMN_1057	thioredoxin	3657	5002	1908	3923.57	4244.43	2309.43	6215.29	2998.29	3543.86	4735.43	5577.29	2514.71	4329.5	4084	4606.79	5156.36	0.943296	1.06405	1.19098	O		NWMN_2177	molybdenum transport ATP-binding protein ModC	0.787299	0.745792	0.777735	SA2072	modC	modC	molybdenum transport ATP-binding protein ModC
NWMN_1058	excinuclease ABC subunit C	13313	7731	8026	7426	7210	11843	12567	5847	5783	9365	5816	9371	10522	7318	9207	7590.5	0.695495	0.875024	0.721393	L		NWMN_2322	6-carboxyhexanoate--CoA ligase	0.837484	0.814174	0.777797	SA2211	bioW	bioW	6-carboxyhexanoate--CoA ligase
NWMN_1059	hypothetical protein	50919	51817	22899	39413	53121	31832	30413	34155	21073	39869	33966	21012	51368	46267	32284	36917.5	0.900697	0.628485	0.718687			NWMN_2099	galactose-6-phosphate isomerase subunit LacA	0.676583	0.599562	0.778244	SA1997	lacA	lacA	galactose-6-phosphate isomerase subunit LacA
NWMN_1060	succinate dehydrogenase cytochrome b-558 subunit	48327	53067	22743	32905	46180	33970	34893	36420	26537	38744	37107	27124	50697	39542.5	35656.5	37925.5	0.779977	0.703326	0.748082	C		NWMN_0632	hypothetical protein	0.838438	0.74645	0.7786	SA0618	-	NWMN_0632	hypothetical protein
NWMN_1061	succinate dehydrogenase flavoprotein subunit	57818	50366	28781	31218	44454	34579	39531	1829	27890	35532	42721	30254	54092	37836	20680	39126.5	0.699475	0.382312	0.723332	C		NWMN_1495	hypothetical protein	0.789015	0.737116	0.778611	SA1421	yqeK	NWMN_1495	hypothetical protein
NWMN_1062	succinate dehydrogenase iron-sulfur subunit	15955	13995	13888	8884	151.3	9732	17373	15656	11662	14741	12201	10347	14975	4517.65	16514.5	13471	0.301679	1.1028	0.899566	C		NWMN_2110	alpha-acetolactate decarboxylase	0.551809	0.716939	0.778626	SA2007	budA1	alsD	alpha-acetolactate decarboxylase
NWMN_1063	glutamate racemase	4820	9841	3522	5419	9680	4728	3612	5303	2673	4954	4813	1831	7330.5	7549.5	4457.5	4883.5	1.02988	0.608076	0.666189	M		NWMN_2312	amino acid ABC transproter permease protein	0.877494	0.802919	0.778819	SA2201	tcyB	NWMN_2312	amino acid ABC transproter permease protein
NWMN_1064	hypothetical protein	4858.29	7059.86	3414.57	4137.14	7015.57	3998.29	3494.29	4446.71	3066.14	4613.14	4483.29	2073.29	5959.07	5576.36	3970.5	4548.21	0.935776	0.666295	0.763242	F		NWMN_0192	glycosyl transferase group 2	0.842307	0.727949	0.778965	SA0248	-	NWMN_0192	glycosyl transferase group 2
NWMN_1065	hypothetical protein	5913.86	9122	4577	4568.57	7785.86	5049.29	5189.86	6145.14	4054.86	6434.43	6357.86	2730.86	7517.93	6177.21	5667.5	6396.14	0.821664	0.753865	0.850785	R		NWMN_0042	hypothetical protein	1.46535	0.715174	0.779468	SA0092	-	NWMN_0042	hypothetical protein
NWMN_1066	fibrinogen-binding protein-related	3954	5165	771.3	1492	2237	845	4583	1610	2092	3234	3132	1661	4559.5	1864.5	3096.5	3183	0.408926	0.679131	0.698103			NWMN_1818	hypothetical protein	0.820247	0.656009	0.77953	SA1696	yfkK	NWMN_1818	hypothetical protein
NWMN_1067	formyl peptide receptor-like 1 inhibitory protein	390.7	534.3	196.1	166.3	250.1	105.8	454.3	100.9	316.6	533	445.8	256.1	462.5	208.2	277.6	489.4	0.450162	0.600216	1.05816			NWMN_1121	phosphopantothenoylcysteine decarboxylase/phosphopantothenate--cysteine ligase	0.873992	0.641793	0.779691	SA1054	coaBC	coaBC	phosphopantothenoylcysteine decarboxylase/phosphopantothenate--cysteine ligase
NWMN_1068	hypothetical protein	1813	2494	2015	1144	986.4	842.8	1863	1593	2661	3257	2435	2120	2153.5	1065.2	1728	2846	0.494637	0.802415	1.32157			NWMN_1165	transcriptional repressor CodY	0.830217	0.70074	0.779778	SA1098	codY	codY	transcriptional repressor CodY
NWMN_1069	fibrinogen-binding protein	17644	28650	3007	6771	8461	2519	23617	7189	15779	7313	26501	19156	23147	7616	15403	16907	0.329028	0.665443	0.730419	M		NWMN_0762	hypothetical protein	0.571973	0.951471	0.779782	SA0748	-	NWMN_0762	hypothetical protein
NWMN_1070	fibrinogen-binding protein -related protein	9046	15809	5422	4272	5741	1957	11781	12724	10994	14714	20022	11227	12427.5	5006.5	12252.5	17368	0.402857	0.985918	1.39755			NWMN_1297	phosphate ABC transporter ATP-binding protein	0.938295	0.827131	0.780672	SA1218	pstB	pstB	phosphate ABC transporter ATP-binding protein
NWMN_1071	hypothetical protein	2765	4098	1160	1666	3873	2782	2479	1817	1622	2573	2261	1528	3431.5	2769.5	2148	2417	0.807081	0.625965	0.704357			NWMN_0822	monovalent cation/H+ antiporter subunit A	0.881443	0.600434	0.780812	SA0813	mnhA	mnhA	monovalent cation/H+ antiporter subunit A
NWMN_1072	hypothetical protein	3228	3714	1753	3313	3749	1580	3062	2764	1878	4125	2564	1152	3471	3531	2913	3344.5	1.01729	0.839239	0.963555			NWMN_2570	imidazole glycerol phosphate synthase subunit hisF	0.827721	0.879774	0.780903	SA2464	hisI	hisIE	imidazole glycerol phosphate synthase subunit hisF
NWMN_1073	alpha-hemolysin	18602	26464	23752	7397	9000	7886	40705	25589	31925	38155	31369	32277	22533	8198.5	33147	34762	0.363844	1.47104	1.54272			NWMN_0187	tagB protein	0.727891	0.586949	0.781124	SA0243	tagB1	NWMN_0187	tagB protein
NWMN_1074	hypothetical protein	545	627	298.7	299.1	333	159.3	607.2	419.3	402.9	727.3	637.4	336.1	586	316.05	513.25	682.35	0.539334	0.875853	1.16442			NWMN_1234	two-component response regulator	1.07947	0.77444	0.781243	SA1159	-	NWMN_1234	two-component response regulator
NWMN_1075	superantigen-like protein	122.4	78.17	63.79	44.61	53.78	65.33	112.4	54.99	68.87	81.75	69.06	61.36	100.285	49.195	83.695	75.405	0.490552	0.834571	0.751907			NWMN_2054	haloacid dehalogenase-like hydrolase	0.920543	0.717084	0.781325	SA1957	-	NWMN_2054	haloacid dehalogenase-like hydrolase
NWMN_1076	superantigen-like protein	199.8	131.4	106.7	60.93	67.95	93.05	129.1	25.97	94.57	0.01	118.5	105.7	165.6	64.44	77.535	59.255	0.38913	0.468207	0.35782			NWMN_2264	sensor histidine kinase	0.861339	0.794872	0.781678	SA2152	hssS	NWMN_2264	sensor histidine kinase
NWMN_1077	superantigen-like set3 protein	156.3	128.4	88.54	68.98	84.15	87.18	131.7	95.62	115.8	140.6	116.5	107.2	142.35	76.565	113.66	128.55	0.537864	0.798455	0.903056			NWMN_2157	GCN5-related N-acetyltransferase	0.881184	0.765603	0.782016	SA2052	-	NWMN_2157	GCN5-related N-acetyltransferase
NWMN_1078	ornithine carbamoyltransferase	786.4	483.314	306.329	370.314	489.629	393.614	512.5	363.9	315.771	518.486	444.643	308.286	634.857	429.971	438.2	481.564	0.677273	0.690234	0.75854	E		NWMN_0827	ornithine--oxo-acid transaminase	0.877923	0.598517	0.782134	SA0818	rocD	rocD	ornithine--oxo-acid transaminase
NWMN_1079	carbamate kinase	722.1	383.5	266.5	288.6	456.8	360.4	581.2	311.9	277.8	339.7	382.7	298.6	552.8	372.7	446.55	361.2	0.674204	0.807797	0.653401	E		NWMN_0442	DNA polymerase III gamma subunit	0.958391	0.565221	0.782572	SA0436	dnaX	dnaX	DNA polymerase III gamma subunit
NWMN_1080	hypothetical protein	1890	889.7	965.7	949.5	1121	1652	1846	771	662.5	1184	695.5	967.3	1389.85	1035.25	1308.5	939.75	0.744865	0.941469	0.676152	S		NWMN_2221	haloacid dehalogenase-like hydrolase	0.877035	0.638405	0.782894	SA2111	-	NWMN_2221	haloacid dehalogenase-like hydrolase
NWMN_1081	hypothetical protein	1439	1263	327.6	636.4	1031	351.7	755	647	445.9	1326	964.9	277.4	1351	833.7	701	1145.45	0.617098	0.518875	0.847853			NWMN_0153	maltose ABC transporter permease protein	0.74589	0.670995	0.783232	SA0208	malC	NWMN_0153	maltose ABC transporter permease protein
NWMN_1082	exfoliative toxin A	1230.45	954.15	530.9	559.25	829.1	555.3	692.9	629.05	540.15	909.65	763.45	481.9	1092.3	694.175	660.975	836.55	0.635517	0.605122	0.765861	P		NWMN_2171	molybdopterin converting factor moa	0.824408	0.596105	0.783392	SA2066	moaE	moaE	molybdopterin converting factor moa
NWMN_1084	antibacterial protein	46547	65173	35164	14661	13900	8768	63216	50495	36256	62407	60534	38379	55860	14280.5	56855.5	61470.5	0.255648	1.01782	1.10044			NWMN_0582	iron compound ABC transporter permease protein	0.872949	0.584571	0.78341	SA0567	fecD	NWMN_0582	iron compound ABC transporter permease protein
NWMN_1085	HAD superfamily hydrolase	1004	1769	792.9	789.7	1212	771.2	877.6	1072	805.6	1206	1139	601.8	1386.5	1000.85	974.8	1172.5	0.721854	0.703065	0.845655	R		NWMN_0141	hypothetical protein	0.672585	0.590365	0.78359		sepS16B	NWMN_0141	hypothetical protein
NWMN_1086	hypothetical protein	17856	41137	17170	16609	24897	16750	17004	22747	18013	24671	24983	13450	29496.5	20753	19875.5	24827	0.703575	0.673826	0.841693	K		NWMN_0427	ABC transporter permease protein	0.678653	0.797546	0.783709	SA0421	metI	NWMN_0427	ABC transporter permease protein
NWMN_1087	hypothetical protein	2320.71	2741.86	1088.87	2216.43	2520.71	1490	1765.14	1738.14	1209.93	2868.14	2202	1130.29	2531.29	2368.57	1751.64	2535.07	0.935719	0.691997	1.0015	S		NWMN_0476	dihydropteroate synthase	0.928603	0.834704	0.78377	SA0472	folP	folP	dihydropteroate synthase
NWMN_1088	cell division protein MraZ	25217	25489	6559	19721	12780	10297	17673	394.6	18307	10148	20700	12600	25353	16250.5	9033.8	15424	0.64097	0.356321	0.60837	S		NWMN_0421	hypothetical protein	0.725126	0.634916	0.784028	SA0415	-	NWMN_0421	hypothetical protein
NWMN_1089	S-adenosyl-methyltransferase MraW	31021	37318	24877	23993	17210	16505	31664	27359	27164	49616	34887	24940	34169.5	20601.5	29511.5	42251.5	0.602921	0.86368	1.23653	M		NWMN_2345	amino acid transporter	0.660288	0.536886	0.784049	SA2235	opuCC	opuCC	amino acid transporter
NWMN_1090	cell division protein	39782	31033	14395	16638	19330	20557	24657	19297	15573	28742	24651	13999	35407.5	17984	21977	26696.5	0.507915	0.620688	0.753979	D		NWMN_0154	maltose ABC transporter permease protein	0.774326	0.746248	0.784066	SA0209	malD	NWMN_0154	maltose ABC transporter permease protein
NWMN_1091	penicillin-binding protein 1	1697	1342	1059	738.8	1006	585	2442	1396	926.9	2094	2024	784.8	1519.5	872.4	1919	2059	0.574136	1.26292	1.35505	M		NWMN_0689	ATP-dependent DNA helicase RecQ	0.780341	0.598951	0.784122	SA0676	recQ	recQ	ATP-dependent DNA helicase RecQ
NWMN_1092	phospho-N-acetylmuramoyl-pentapeptide-transferase	6362	3190	2660	2412	2939	2665	5815	3785	3200	5680	5079	3125	4776	2675.5	4800	5379.5	0.560197	1.00503	1.12636	M		NWMN_1744	hypothetical protein	0.537063	0.680317	0.784127	SA1670	-	NWMN_1744	hypothetical protein
NWMN_1093	UDP-N-acetylmuramoyl-L-alanyl-D-glutamate synthetase	10946	7134	5680	5289	5988	6343	8902	6481	5710	9227	7258	6313	9040	5638.5	7691.5	8242.5	0.623728	0.85083	0.911781	M		NWMN_1118	hypothetical protein	0.700956	0.623852	0.784242	SA1050	-	NWMN_1118	hypothetical protein
NWMN_1094	cell division protein	7151	6114	4305	5228	5531	4456	6708	4796	4317	7417	7285	4877	6632.5	5379.5	5752	7351	0.811082	0.867245	1.10833	M		NWMN_0422	hypothetical protein	0.737212	0.701128	0.784242	SA0416	est	NWMN_0422	hypothetical protein
NWMN_1095	cell division protein	19591	19031	10844	14347	18552	14965	15597	15752	10001	21242	20406	11662	19311	16449.5	15674.5	20824	0.85182	0.811688	1.07835	D		NWMN_0781	ABC transporter permease protein	0.641275	0.585233	0.784319	SA0770	metI	NWMN_0781	ABC transporter permease protein
NWMN_1096	cell division protein FtsZ	23426	27565	13564	20625	24698	14438	23007	20437	12758	25355	30021	14361	25495.5	22661.5	21722	27688	0.888843	0.851993	1.086	D		NWMN_1397	hypothetical protein	1.42396	0.790756	0.784564	SA1320	-	NWMN_1397	hypothetical protein
NWMN_1097	hypothetical protein	17123.6	25730	9062.8	12131.2	18133.6	9900.4	10304	14492.4	7115.4	15253.2	18652	6428.4	21426.8	15132.4	12398.2	16952.6	0.706237	0.578631	0.791187	S		NWMN_1523	tRNA (5-methylaminomethyl-2-thiouridylate)- methyltransferase	0.82176	0.710454	0.784783	SA1449	mnmA	mnmA	tRNA (5-methylaminomethyl-2-thiouridylate)- methyltransferase
NWMN_1098	hypothetical protein	21492	27608.5	11085.5	17974	13671	14813	15063.5	19487.5	12818	23888.5	22434	10351.5	24550.2	15822.5	17275.5	23161.2	0.644494	0.703679	0.943422	R		NWMN_0707	UDP-N-acetylenolpyruvoylglucosamine reductase	0.982924	0.627394	0.784888	SA0693	murB	murB	UDP-N-acetylenolpyruvoylglucosamine reductase
NWMN_1099	hypothetical protein	4295	5902.5	1786.65	3449.5	5158	2918	4066	2413.55	2739	3332	4334.5	2311.5	5098.75	4303.75	3239.78	3833.25	0.844079	0.635406	0.751802	S		NWMN_2262	hemin permease domain-containing protein HrtB	0.901069	0.689133	0.785061	SA2150	htrA	NWMN_2262	hemin permease domain-containing protein HrtB
NWMN_1100	hypothetical protein	1884	2112	1247	1438	2421	1702	2447	1912	1254	2049	1553	819.5	1998	1929.5	2179.5	1801	0.965716	1.09084	0.901401	S		NWMN_2455	galactoside O-acetyltransferase	1.06069	0.662928	0.785374	SA2342	lacA	NWMN_2455	galactoside O-acetyltransferase
NWMN_1101	hypothetical protein	1135	1055	278.7	808.1	856.2	344.8	677.6	709.2	295.1	1204	850.2	256.7	1095	832.15	693.4	1027.1	0.759954	0.633242	0.937991	S		NWMN_0103	capsular polysaccharide biosynthesis protein CapI	1.1185	1.12429	0.786052	SA0152	capI	capI	capsular polysaccharide biosynthesis protein CapI
NWMN_1102	hypothetical protein	17299	20786	4857	17841	19022	5422	11995	9343	3845	14997	8666	2567	19042.5	18431.5	10669	11831.5	0.967914	0.560273	0.621321	D		NWMN_2613	ribonuclease P	0.893543	0.63798	0.786232	SA2502	rnpA	rnpA	ribonuclease P
NWMN_1103	isoleucyl-tRNA synthetase	2023	2698	948.7	1402	2396	891.1	1826	1684	757.2	1885	2065	617.6	2360.5	1899	1755	1975	0.804491	0.743487	0.836687	J		NWMN_1687	lipoprotein	1.29548	0.724138	0.786289	SA1616	-	NWMN_1687	lipoprotein
NWMN_1104	hypothetical protein	83.43	85.94	45.06	56.12	83.37	44.81	70.17	58.42	58.89	106.5	97.79	56.44	84.685	69.745	64.295	102.145	0.823582	0.759225	1.20618			NWMN_0236	hypothetical protein	0.671857	0.714043	0.786523	NA		NWMN_0236	hypothetical protein
NWMN_1105	glyoxalase	1140	1920	457.9	1086	1417	455	1254	959.4	517.2	1322	1296	435.3	1530	1251.5	1106.7	1309	0.817974	0.723333	0.855556	R		NWMN_0646	hypothetical protein	0.79737	0.589825	0.78653	SA0632	-	NWMN_0646	hypothetical protein
NWMN_1107	lipoprotein signal peptidase	1913	2009	800	1848	1611	1235	1631	1154	859	2123	1457	699.3	1961	1729.5	1392.5	1790	0.881948	0.710097	0.9128	M		NWMN_1581	dephospho-CoA kinase	0.757563	0.724908	0.786542	SA1511	coaE	coaE	dephospho-CoA kinase
NWMN_1108	pseudouridylate synthase	1434	1454.71	791.757	1354.43	1409.57	831.686	1367.14	974.486	679.371	1735.14	1198.71	608.529	1444.36	1382	1170.81	1466.93	0.956827	0.810613	1.01563	J		NWMN_0885	hypothetical protein	0.655026	0.733288	0.786737	SA0873	-	NWMN_0885	hypothetical protein
NWMN_1109	pyrimidine regulatory protein PyrR	3397.43	4446.14	1163.86	7914.71	2682.43	919.529	3725.71	2091.71	1161	6721.14	3789.43	1024.81	3921.79	5298.57	2908.71	5255.29	1.35106	0.741681	1.34002	F		NWMN_0770	hypothetical protein	0.987239	0.649215	0.786833	SA0754	-	NWMN_0770	hypothetical protein
NWMN_1110	uracil permease	1059	2083	521.2	4178	1449	411.1	1045	842.6	431.5	1832	995.9	378.3	1571	2813.5	943.8	1413.95	1.7909	0.600764	0.900032	F		NWMN_2332	hypothetical protein	1.37002	0.652006	0.786892	SA2221	-	NWMN_2332	hypothetical protein
NWMN_1111	aspartate carbamoyltransferase catalytic subunit PyrB	3001.71	3417	1427.29	5191.71	2429.86	1376.57	1326	1613.86	1065	2745.14	2430.29	1088.6	3209.36	3810.79	1469.93	2587.71	1.1874	0.458013	0.806303	F		NWMN_1540	preprotein translocase YajC subunit	0.892852	0.663506	0.786907	SA1464	yajC	NWMN_1540	preprotein translocase YajC subunit
NWMN_1112	dihydroorotase	4144.5	3875.5	1909.5	4789	3750	2441.5	1927.5	1939	1458.5	2538	3036	1638.5	4010	4269.5	1933.25	2787	1.06471	0.482107	0.695012	F		NWMN_2092	hypothetical protein	0.851747	0.604461	0.786914	SA1990	-	NWMN_2092	hypothetical protein
NWMN_1113	carbamoyl phosphate synthase small subunit	2579	2301	1161	2643	2128	1498	1465	1119	993.8	1563	2032	1192	2440	2385.5	1292	1797.5	0.977664	0.529508	0.73668	E		NWMN_0886	hypothetical protein	0.826685	0.709503	0.787005	SA0874	ltaA	NWMN_0886	hypothetical protein
NWMN_1114	carbamoyl phosphate synthase large subunit	3714	3536	2029	4451	3340	2312	2127	1790	1553	3136	3430	1901	3625	3895.5	1958.5	3283	1.07462	0.540276	0.905655	E		NWMN_2111	acetolactate synthase	1.02599	0.957746	0.787344	SA2008	alsS	alsS	acetolactate synthase
NWMN_1115	orotidine 5'-phosphate decarboxylase	2608	2420	1468	3256	2250	2083	1772	1216	1292	2447	2161	1372	2514	2753	1494	2304	1.09507	0.594272	0.916468	F		NWMN_2057	PTS system mannitol-specific IIBCcomponent	1.04645	0.584483	0.787348	SA1960	mtlF	mtlF	PTS system mannitol-specific IIBCcomponent
NWMN_1116	orotate phosphoribosyltransferase	1970	1280	692.2	1588	1265	862.05	1100	555.35	615.85	1131.8	924.35	718.9	1625	1426.5	827.675	1028.08	0.877846	0.509338	0.632662	F		NWMN_1947	fructokinase	0.673432	0.619378	0.787468	SA1845	frk1	NWMN_1947	fructokinase
NWMN_1117	hypothetical protein	733.643	694.929	344.771	914.857	673.457	425.943	602.157	401.529	396.386	883.786	672.886	367.886	714.286	794.157	501.843	778.336	1.11182	0.70258	1.08967			NWMN_1423	2-oxoisovalerate dehydrogenase E1 component alpha subunit	0.581747	0.671787	0.787483	SA1348	bfmBAA	NWMN_1423	2-oxoisovalerate dehydrogenase E1 component alpha subunit
NWMN_1118	hypothetical protein	3692	6982	2186	3097	4385	2555	3488	3171	3017	4312	4059	2335	5337	3741	3329.5	4185.5	0.700956	0.623852	0.784242	S		NWMN_2497	2-dehydropantoate 2-reductase	1.02145	0.598353	0.787589	SA2393	panE	panE	2-dehydropantoate 2-reductase
NWMN_1119	fibronectin-binding protein A-related	3441	3879	994.6	3446	3407	1213	2797	2026	1031	3249	1805	733	3660	3426.5	2411.5	2527	0.936202	0.65888	0.690437	K		NWMN_0668	fructose 1-phosphate kinase	0.846197	0.622443	0.787886	SA0654	fruB	fruB	fructose 1-phosphate kinase
NWMN_1120	guanylate kinase	16672	25162	8216	16960	23524	9550	17147	15215	7907	18831	16074	4760	20917	20242	16181	17452.5	0.96773	0.773581	0.834369	F		NWMN_0388	superantigen-like protein	0.822857	0.780106	0.787937	SA0382	ssl1	set1nm	superantigen-like protein
NWMN_1121	phosphopantothenoylcysteine decarboxylase/phosphopantothenate--cysteine ligase	3154	4163	1452	2579	3816	1833	2229	2467	1262	3053	2652	1044	3658.5	3197.5	2348	2852.5	0.873992	0.641793	0.779691	H		NWMN_0728	HPr kinase/phosphorylase	0.940401	0.585486	0.787973	SA0715	hprK	hprK	HPr kinase/phosphorylase
NWMN_1122	primosomal protein N	7441	10324	4737	5025	8389	4855	4638	5302	3885	5874	7124	3652	8882.5	6707	4970	6499	0.75508	0.559527	0.731663	L		NWMN_2526	alkaline phosphatase III	1.3985	0.741833	0.788106	SA2420	phoB	phoB	alkaline phosphatase III
NWMN_1123	hypothetical protein	769.8	1276	393.7	811.4	943.6	351.7	766.9	540.1	418.6	706	675.6	235.1	1022.9	877.5	653.5	690.8	0.857855	0.63887	0.675335			NWMN_1572	50S ribosomal protein L20	0.782866	0.697197	0.788259	SA1502	rplT	rplT	50S ribosomal protein L20
NWMN_1124	hypothetical protein	57147	50672	60739	31582	32984	59168	61760	36264	64024	52145	45192	58689	53909.5	32283	49012	48668.5	0.598837	0.909153	0.902782	S		NWMN_2068	drug resistance transporter EmrB/QacA sub	0.808532	1.04117	0.788442	SA1970	lmrB3	NWMN_2068	drug resistance transporter EmrB/QacA sub
NWMN_1125	polypeptide deformylase	8524.71	6540.57	2357	6767.29	6962.14	3947.86	4526.14	4295.57	2375.43	8556	5188.43	2304.86	7532.64	6864.71	4410.86	6872.21	0.911329	0.585566	0.912324	J		NWMN_1485	heat-inducible transcription repressor HrcA	0.568192	0.689325	0.788518	SA1411	hrcA	hrcA	heat-inducible transcription repressor HrcA
NWMN_1126	methionyl-tRNA formyltransferase	12055	10875	3751	7891	9264	4510	7084	6770	3639	11440	8420	3732	11465	8577.5	6927	9930	0.748147	0.604187	0.866114	J		NWMN_2593	RarD protein	0.723092	0.587248	0.78911	SA2487	rarD	NWMN_2593	RarD protein
NWMN_1127	sun protein	13031.3	12489.1	6288.57	6687.86	9141.43	5886.57	8660.86	8425	5855.71	14566	10639.4	6640.86	12760.2	7914.64	8542.93	12602.7	0.620259	0.669497	0.987657	J		NWMN_0133	PTS enzyme II glucose-specific factor IIABC component	0.906182	0.666628	0.789161	SA0183	glcA	glcA	PTS enzyme II glucose-specific factor IIABC component
NWMN_1128	hypothetical protein	7962	7586	3941	139.3	98.04	424.4	5039	5409	4184	8008	6931	4352	7774	118.67	5224	7469.5	0.015265	0.671984	0.960831	R		NWMN_0186	zinc-containing alcohol dehydrogenase	0.790102	0.634812	0.789411	SA0242	tarJ'	NWMN_0186	zinc-containing alcohol dehydrogenase
NWMN_1129	protein phosphatase 2C domain-containing protein	7405	7515	3889	57.56	54.04	53.17	4884	5609	4691	87.85	89.87	55.91	7460	55.8	5246.5	88.86	0.00747989	0.703284	0.0119115	T		NWMN_2369	short chain dehydrogenase	0.793876	1.26796	0.789634	SA2260	fabG2	NWMN_2369	short chain dehydrogenase
NWMN_1130	serine/threonine-protein kinase	6991	6535	3759	6676	10344	4174	74.84	19.19	20.98	17.23	14.7	23.48	6763	8510	47.015	15.965	1.25832	0.0069518	0.00236064	R		NWMN_1163	ATP-dependent protease peptidase subunit	0.946292	0.609017	0.789762	SA1096	clpQ	hslV	ATP-dependent protease peptidase subunit
NWMN_1131	hypothetical protein	3004	3205	1354	2938	3170	1936	2623	2188	1562	4077	2539	1421	3104.5	3054	2405.5	3308	0.983733	0.774843	1.06555	R		NWMN_0009	hypothetical protein	0.809461	0.601244	0.789818	SA0010	azlC	NWMN_0009	hypothetical protein
NWMN_1132	ribulose-phosphate 3-epimerase	3836.75	5165	2374	3489.75	4502.25	2792	4447	3386.75	2167	5405.5	3929.75	2500.75	4500.88	3996	3916.88	4667.62	0.887827	0.870247	1.03705	G		NWMN_0245	hypothetical protein	0.620528	0.836114	0.790169	SA0291	-	NWMN_0245	hypothetical protein
NWMN_1133	hypothetical protein	2321	2450	1276	1690	2414	1693	2493	1739	1411	2651	2197	1523	2385.5	2052	2116	2424	0.860197	0.887026	1.01614	H		NWMN_1959	hypothetical protein	0.766312	0.638857	0.790664	SA1857	yjeE	NWMN_1959	hypothetical protein
NWMN_1134	50S ribosomal protein L28	1505.14	1225.43	1455.57	1600.29	1382.86	938.4	4072.71	1563.43	1323.14	1509.29	1472.71	1424.14	1365.29	1491.57	2818.07	1491	1.0925	2.06409	1.09208	J		NWMN_2030	hypothetical protein	0.871146	0.791622	0.790772	SA1928	-	NWMN_2030	hypothetical protein
NWMN_1135	hypothetical protein	14271	18745	6765	14624	19071	8628	12658	11314	6485	17884	12923	4866	16508	16847.5	11986	15403.5	1.02057	0.726072	0.933093	S		NWMN_0979	pyruvate carboxylase	0.985898	0.59884	0.790828	SA0963	pycA	pycA	pyruvate carboxylase
NWMN_1136	DAK2 domain-containing protein	10679	13836.9	3453	11009.6	11519.1	5989.43	10337.6	7683.29	3905.14	6552.09	8113.57	3373.43	12257.9	11264.4	9010.43	7332.83	0.918945	0.735069	0.598211	R		NWMN_0225	hypothetical protein	0.750953	0.638359	0.791131	SA0278	esxB	NWMN_0225	hypothetical protein
NWMN_1137	ATP-dependent DNA helicase RecG	5487	8021	2996	5314	7335	4387	4521	4689	3407	6055	5384	2288	6754	6324.5	4605	5719.5	0.936408	0.681818	0.846832	L		NWMN_0920	hypothetical protein	0.876381	0.699823	0.791162	SA0903	-	NWMN_0920	hypothetical protein
NWMN_1138	fatty acid biosynthesis transcriptional regulator	6348	5709	1062	4045	5920	3690	4338	433.3	2842	4743	4382	3382	6028.5	4982.5	2385.65	4562.5	0.826491	0.395729	0.756822	Q		NWMN_1097	hypothetical protein	0.706237	0.578631	0.791187	SA1030	-	NWMN_1097	hypothetical protein
NWMN_1139	glycerol-3-phosphate acyltransferase PlsX	7052	7264	3613	5136	7315	4747	5074	5082	4050	8653	6996	4772	7158	6225.5	5078	7824.5	0.869726	0.709416	1.09311	I		NWMN_1553	hypothetical protein	1.57493	0.613592	0.791303	SA1477	-	NWMN_1553	hypothetical protein
NWMN_1140	malonyl CoA-acyl carrier protein transacylase	4493	4196.5	2426.5	3035.5	4487.5	2964	3440.5	3210	2374.5	5267.5	4448.5	3118.5	4344.75	3761.5	3325.25	4858	0.865758	0.765349	1.11813	I		NWMN_0077	superoxide dismutase	0.682253	0.629827	0.791729	SA0128	sodM	sodM	superoxide dismutase
NWMN_1141	3-oxoacyl-(acyl-carrier-protein) reductase	2601	2409	1592	1780	2513	1548	2764	1831	1470	3132	2655	1792	2505	2146.5	2297.5	2893.5	0.856886	0.917166	1.15509	I		NWMN_2090	alcohol dehydrogenase zinc-containing	0.638878	0.593596	0.791872	SA1988	-	NWMN_2090	alcohol dehydrogenase zinc-containing
NWMN_1142	acyl carrier protein	1523	1729	566.9	1660	1836	1356	3394	1235	2103	2068	2324	1793	1626	1748	2314.5	2196	1.07503	1.42343	1.35055	I		NWMN_1176	transcription elongation factor NusA	0.823315	0.615104	0.792093	SA1109	nusA	nusA	transcription elongation factor NusA
NWMN_1143	ribonuclease III	2685	3165	1090	2438	2754	1434	1435	853.5	811.9	2077	1643	699.2	2925	2596	1144.25	1860	0.887521	0.391197	0.635897	K		NWMN_2382	hypothetical protein	0.742852	0.66373	0.792553		-	NWMN_2382	hypothetical protein
NWMN_1144	SMC domain-containing protein	3343.67	4031	1574.67	2319.67	2976	1677.33	2093	1741.33	1267.67	2604	2382.67	1064.23	3687.33	2647.83	1917.17	2493.33	0.718089	0.519933	0.676189	D		NWMN_0888	UDP-N-acetylmuramoylalanyl-D-glutamate--2 6-diaminopimelate ligase	0.909416	0.560078	0.792753	SA0876	murE	murE	UDP-N-acetylmuramoylalanyl-D-glutamate--2 6-diaminopimelate ligase
NWMN_1145	signal recognition particle-docking protein FtsY	5139	5361	2585	2676	4443	3299	2846	3157	2496	3299	4184	2624	5250	3559.5	3001.5	3741.5	0.678	0.571714	0.712667	U		NWMN_1364	DNA replication protein DnaD	0.89549	0.599645	0.792925	SA1286	dnaD	dnaD	DNA replication protein DnaD
NWMN_1146	hypothetical protein	5587	5305	2945	2522	4635	3290	2810	3586	2531	3980	4459	2735	5446	3578.5	3198	4219.5	0.657088	0.58722	0.774789	S		NWMN_0596	CPA3 family monovalent cation (K+ or Na+):proton (H+) antiporter-3, MnhD subunit (mnhD1)	0.545874	0.848123	0.79298	SA0581	mnhD	mnhD	CPA3 family monovalent cation (K+ or Na+):proton (H+) antiporter-3, MnhD subunit (mnhD1)
NWMN_1147	signal recognition particle protein	4555	5869	2263	3782	5305	2675	3739	3526	2001	5524	5110	1885	5212	4543.5	3632.5	5317	0.871738	0.696949	1.02015	U		NWMN_1746	hypothetical protein	0.646312	1.32486	0.793063	SA1671	-	NWMN_1746	hypothetical protein
NWMN_1148	30S ribosomal protein S16	1355	1307	476.6	1542	1609	465.1	2016	1167	619.8	1874	1424	436.2	1331	1575.5	1591.5	1649	1.1837	1.19572	1.23892	J		NWMN_0640	hypothetical protein	0.826338	0.586643	0.793177	SA0626	-	NWMN_0640	hypothetical protein
NWMN_1149	16S rRNA processing protein	1153	1147	344.5	900.4	1113	517.2	964.9	708.9	352.2	1338	846.3	311.4	1150	1006.7	836.9	1092.15	0.875391	0.727739	0.949696	J		NWMN_1853	prephenate dehydratase	0.780976	0.810933	0.793194	SA1731	pheA	NWMN_1853	prephenate dehydratase
NWMN_1150	tRNA (guanine-N1)-methyltransferase	1322	1348	464.5	1282	1438	566	1167	1191	469	1657	1166	421.5	1335	1360	1179	1411.5	1.01873	0.883146	1.0573	J		NWMN_2471	TetR family regulatory protein	0.883883	0.684117	0.793243	SA2358	acrA	NWMN_2471	TetR family regulatory protein
NWMN_1151	50S ribosomal protein L19	779.2	801	430.5	767.5	1052	639.3	1042	701.3	468.2	1107	876.5	382.7	790.1	909.75	871.65	991.75	1.15144	1.10321	1.25522	J		NWMN_0432	hypothetical protein	0.770642	0.727627	0.793665	SA0426	-	NWMN_0432	hypothetical protein
NWMN_1152	hypothetical protein	4593	4839	2432	2948	3806	3283	2684	3047	2095	4309	3630	2190	4716	3377	2865.5	3969.5	0.716073	0.607612	0.841709	S		NWMN_0290	hypothetical protein	0.861652	0.827867	0.793835	NA		NWMN_0290	hypothetical protein
NWMN_1153	ribosomal biogenesis GTPase	1727	1360	563.9	1369	1455	960.6	1156	949.9	510.6	1822	1325	500.1	1543.5	1412	1052.95	1573.5	0.914804	0.682183	1.01944	R		NWMN_0656	cobalamin synthesis protein P47K	0.647429	0.766143	0.794286	SA0642	cobW2	NWMN_0656	cobalamin synthesis protein P47K
NWMN_1154	ribonuclease HII	2561.57	1812.86	632.8	1675.14	1849	1291.71	1353.14	959.143	736.371	1370.03	1622.57	976.829	2187.21	1762.07	1156.14	1496.3	0.805624	0.528591	0.684112	L		NWMN_0303	hypothetical protein	0.816562	0.659883	0.794297		-	NWMN_0303	hypothetical protein
NWMN_1155	succinyl-CoA synthetase subunit beta	47133.5	52047.5	26573	46336.5	52674	33307.5	45328	48443.5	22286.5	48350	49400	25161	49590.5	49505.2	46885.8	48875	0.998281	0.945458	0.985572	C		NWMN_0837	exonuclease RexB	0.824214	0.508999	0.794375	SA0827	addB	rexB	exonuclease RexB
NWMN_1156	succinyl-CoA synthetase subunit alpha	28677	44997	17609	28470	42587	21377	29321	34353	16280	33959	35417	16311	36837	35528.5	31837	34688	0.964479	0.864267	0.941662	C		NWMN_0735	hypothetical protein	0.704428	1.02999	0.794595	SA0722	whiA	NWMN_0735	hypothetical protein
NWMN_1157	cell wall hydrolase	338.9	341.1	296.1	334.4	308.6	177.5	353.7	315.2	273.6	459.7	325.2	227.7	340	321.5	334.45	392.45	0.945588	0.983676	1.15426	M		NWMN_1864	hypothetical protein	0.775722	0.697048	0.794787	SA1741	-	NWMN_1864	hypothetical protein
NWMN_1158	methicillin resistance-related protein FmhC	319.3	264.5	144.3	219.3	216.9	140.7	286.4	185.3	189.9	380.8	297.5	164	291.9	218.1	235.85	339.15	0.747174	0.807982	1.16187	V		NWMN_2269	hypothetical protein	0.864886	0.56717	0.795199	SA2157	-	NWMN_2269	hypothetical protein
NWMN_1159	hypothetical protein	1079	1052	343.1	605.7	1036	447.3	476.9	545.8	255.2	572.3	657.2	242.3	1065.5	820.85	511.35	614.75	0.770389	0.479916	0.576959	L		NWMN_1177	ribosomal protein L7Ae	0.829718	0.605085	0.795471	SA1111	rpl7AE	rpl7AE	ribosomal protein L7Ae
NWMN_1160	DNA topoisomerase I	34694	14945	12148	16887	19676	18713	21177	10583	6086	13043	11928	9414	24819.5	18281.5	15880	12485.5	0.736578	0.639819	0.503052	L		NWMN_1571	MutT/nudix	0.842771	0.587509	0.795698	SA1501	-	NWMN_1571	MutT/nudix
NWMN_1161	tRNA (uracil-5-)-methyltransferase Gid	10676.6	7819.14	7820.29	8827.71	9898.71	11945.3	9706.43	7279.29	5581	9312.14	6902.86	7351.71	9247.86	9363.21	8492.86	8107.5	1.01247	0.918359	0.87669	J		NWMN_2496	3-methyl-2-oxobutanoate hydroxymethyltransferase	0.85109	0.651151	0.795998	SA2392	panB	panB	3-methyl-2-oxobutanoate hydroxymethyltransferase
NWMN_1162	site-specific recombinase	16114	21641	8711	11862	21676	13849	11230	13376	9537	14797	15904	10138	18877.5	16769	12303	15350.5	0.888306	0.651728	0.813164	L		NWMN_0152	maltose ABC transporter, maltose-binding protein	0.908006	0.57319	0.796036	SA0207	-	NWMN_0152	maltose ABC transporter, maltose-binding protein
NWMN_1163	ATP-dependent protease peptidase subunit	13589	17961	7054	10080.5	19775	10646	7452.5	11762	7250	11442	13475	8293.5	15775	14927.8	9607.25	12458.5	0.946292	0.609017	0.789762	O		NWMN_0234	hypothetical protein	0.56582	0.72454	0.796061		-	NWMN_0234	hypothetical protein
NWMN_1164	ATP-dependent protease ATP-binding subunit	13516	11976	6053	7616	14512	9995	6805	9534	6743	9966	10990	7209	12746	11064	8169.5	10478	0.868037	0.640946	0.822062	O		NWMN_0700	ribonucleotide-diphosphate reductase subunit alpha	0.700835	0.732715	0.7963	SA0686	nrdE	nrdE	ribonucleotide-diphosphate reductase subunit alpha
NWMN_1165	transcriptional repressor CodY	7851	9318	4857	5936	8318	4670	6822	5209	4467	4960	8428	5139	8584.5	7127	6015.5	6694	0.830217	0.70074	0.779778	K		NWMN_1174	DNA polymerase III PolC	0.760482	0.58796	0.796459	SA1107	polC	polC	DNA polymerase III PolC
NWMN_1166	30S ribosomal protein S2	7597	5097	819.4	4811	5096	2828	6003	2141	2216	449	1949	2429	6347	4953.5	4072	1199	0.780447	0.641563	0.188908	J		NWMN_2028	UDP-N-acetylglucosamine 1-carboxyvinyltransferase	0.88224	0.646705	0.796705	SA1926	murZ	murZ	UDP-N-acetylglucosamine 1-carboxyvinyltransferase
NWMN_1167	elongation factor Ts	20434	25299	14234	14853.5	19597	8745.5	18703.5	15240	10185.5	18075	17301	9145	22866.5	17225.2	16971.8	17688	0.753296	0.74221	0.773533	J		NWMN_0104	capsular polysaccharide biosynthesis protein CapJ	1.22631	0.965877	0.796743	SA0153	capJ	capJ	capsular polysaccharide biosynthesis protein CapJ
NWMN_1168	uridylate kinase	7918.8	10795.2	3221.9	6367.4	9390.6	2005	6705.6	5915.6	2523.96	7018.34	6634.18	1682.26	9357	7879	6310.6	6826.26	0.842043	0.674426	0.729535	F		NWMN_2354	glutamyl-aminopeptidase	0.783904	0.736692	0.796895	SA2244	pepA2	NWMN_2354	glutamyl-aminopeptidase
NWMN_1169	ribosome recycling factor	5011	7632	2884	4151	5241	1786	5634	4865	2560	5328	4953	1606	6321.5	4696	5249.5	5140.5	0.742862	0.83042	0.813177	J		NWMN_1942	hydrolase	0.601381	0.662795	0.797239	SA1841	amiE	NWMN_1942	hydrolase
NWMN_1170	undecaprenyl diphosphate synthase	3558	3640	1111	3634	3426	911.5	3840	2883	1299	5314	3337	827	3599	3530	3361.5	4325.5	0.980828	0.934009	1.20186	I		NWMN_1634	FtsK/SpoIIIE (DNA translocase stage III)	0.782201	0.75439	0.797352	SA1562	ftsK	NWMN_1634	FtsK/SpoIIIE (DNA translocase stage III)
NWMN_1171	phosphatidate cytidylyltransferase	1121	1158	294.9	1023	1225	200.6	871.1	804.9	256.5	1207	1182	187.8	1139.5	1124	838	1194.5	0.986398	0.73541	1.04827	I		NWMN_0028	metallo-beta-lactamase super	0.93858	1.0014	0.797505	SA0083	-	NWMN_0028	metallo-beta-lactamase super
NWMN_1172	membrane-associated zinc metalloprotease	2872	2711	881	2341	3268	1081	2194	2110	796.5	2700	2276	761.3	2791.5	2804.5	2152	2488	1.00466	0.770912	0.891277	M		NWMN_1554	hypothetical protein	0.95991	0.570818	0.797721	SA1478	-	NWMN_1554	hypothetical protein
NWMN_1173	prolyl-tRNA synthetase	2347	2610	1377	1954	3069	1577	2166	2142	1102	2939	2474	1051	2478.5	2511.5	2154	2706.5	1.01331	0.869074	1.09199	J		NWMN_1670	hypothetical protein	0.80014	0.333868	0.797773	SA1597	-	NWMN_1670	hypothetical protein
NWMN_1174	DNA polymerase III PolC	9957	11223	6242	5562	10545	8514	5062	7391	5592	6625	10244	5542	10590	8053.5	6226.5	8434.5	0.760482	0.58796	0.796459	L		NWMN_0424	cysteine synthase	0.883097	0.908478	0.79814	SA0418	cysM	cysM	cysteine synthase
NWMN_1175	hypothetical protein	8177.14	7155.14	2953.14	6126.86	8065	4446.71	4659.43	4879.86	3028	6916.14	6426	3174.57	7666.14	7095.93	4769.64	6671.07	0.925619	0.62217	0.870199	S		NWMN_1491	competence protein ComEB required for DNA binding and uptake	0.756059	0.754345	0.798343	SA1417	comEB	comEB	competence protein ComEB required for DNA binding and uptake
NWMN_1176	transcription elongation factor NusA	5153	4712	1421	3590	4532	2392	3040	3028	1657	3989	3825	1954	4932.5	4061	3034	3907	0.823315	0.615104	0.792093	K		NWMN_2008	F0F1 ATP synthase subunit gamma	0.744572	0.604876	0.798622	SA1906	atpG	atpG	F0F1 ATP synthase subunit gamma
NWMN_1177	ribosomal protein L7Ae	13163	12007	5539	8874	12010	7032	7346	7884	4774	9471	10551	5339	12585	10442	7615	10011	0.829718	0.605085	0.795471	J		NWMN_2409	DedA	0.904566	0.688954	0.798675	SA2301	-	NWMN_2409	DedA
NWMN_1178	translation initiation factor IF-2	4225	3758	2232	2478	3549	2928	3039	2688	2180	3789	4059	2699	3991.5	3013.5	2863.5	3924	0.754979	0.717399	0.983089	J		NWMN_1196	hypothetical protein	1.16938	0.819068	0.798712	SAS037	-	NWMN_1196	hypothetical protein
NWMN_1179	ribosome-binding factor A	3120	2938	1069	3742	3422	1465	3274	2431	1451	4364	3148	1237	3029	3582	2852.5	3756	1.18257	0.94173	1.24001	J		NWMN_0201	hypothetical protein	0.697957	0.954931	0.798928	SA0257	ubiE	NWMN_0201	hypothetical protein
NWMN_1180	tRNA pseudouridine synthase B	10466	3471	4296	2683	1902	4228	8630	3210	4567	3037	3083	3648	6968.5	2292.5	5920	3060	0.32898	0.849537	0.439119	J		NWMN_1939	hypothetical protein	0.733427	0.936788	0.799232	SA1838	-	NWMN_1939	hypothetical protein
NWMN_1181	riboflavin biosynthesis protein RibF	10434.3	4730.57	4231.43	3650.57	4624.86	4914	9854	3521.71	3348.29	4395.43	3352.43	3901.29	7582.43	4137.71	6687.86	3873.93	0.545698	0.88202	0.510909	H		NWMN_1322	CbbQ/NirQ/NorQ/GpvN	0.547362	0.645867	0.799298	SA1241	norQ	NWMN_1322	CbbQ/NirQ/NorQ/GpvN
NWMN_1182	30S ribosomal protein S15	9905	7096	5218	6431	7467	5405	11702	5413	4050	7764	6271	4523	8500.5	6949	8557.5	7017.5	0.817481	1.00671	0.82554	J		NWMN_0337	Dyp-type peroxidase	0.806842	0.678613	0.799395	SA0332	efeB	NWMN_0337	Dyp-type peroxidase
NWMN_1183	polynucleotide phosphorylase/polyadenylase	15311	17737	4249	13333	17418	4665	10636	10024	3897	10796	12246	3032	16524	15375.5	10330	11521	0.930495	0.625151	0.697228	J		NWMN_1936	integrase	0.963755	0.710623	0.800067		-	NWMN_1936	integrase
NWMN_1184	RNA-metabolising metallo-beta-lactamase	6457	8152	3116	5467	7104	3360	7527	5712	3108	9593	7305	2749	7304.5	6285.5	6619.5	8449	0.860497	0.906222	1.15668	R		NWMN_2236	hypothetical protein	1.34457	0.646605	0.800074	SA2126	lyrA	NWMN_2236	hypothetical protein
NWMN_1185	DNA translocase FtsK/SpoIIIE	7281	4753	3342	3588	0.01	3891	6081	3420	3269	4502	3284	2816	6017	1794.01	4750.5	3893	0.298156	0.789513	0.647	D		NWMN_0142	hypothetical protein	0.689679	0.751588	0.800093		-	NWMN_0142	hypothetical protein
NWMN_1186	transcriptional regulator GntR	4846.6	3066.4	1064.16	2093.6	2135.8	866	3178.8	1340.4	1046.12	1521	1282.8	551.06	3956.5	2114.7	2259.6	1401.9	0.534488	0.571111	0.354328	K		NWMN_2280	hypothetical protein	0.775954	0.61143	0.800277	SA2168	-	NWMN_2280	hypothetical protein
NWMN_1187	hypothetical protein	2204	1745	634.4	958	1132	368.2	2515	808.5	524.1	1014	793.8	294.6	1974.5	1045	1661.75	903.9	0.529248	0.841605	0.457787	R		NWMN_1996	hydroxyethylthiazole kinase	0.792705	0.581119	0.800462	SA1895	thiM	thiM	hydroxyethylthiazole kinase
NWMN_1188	peptidase M16	2974	4315	3082	2851	2663	2223	4141	2218	2150	4389	2962	2331	3644.5	2757	3179.5	3675.5	0.756482	0.87241	1.00851	R		NWMN_0265	hypothetical protein	0.678562	0.563266	0.800463		-	NWMN_0265	hypothetical protein
NWMN_1189	acetoacetyl-CoA reductase	3018	5613	2974	3545	3173	2341	3069	2980	2582	5618	3343	2488	4315.5	3359	3024.5	4480.5	0.778357	0.700846	1.03823	I		NWMN_2313	amino acid ABC transporter amino acid-binding protein	0.907743	0.897364	0.800494	SA2202	tcyA	NWMN_2313	amino acid ABC transporter amino acid-binding protein
NWMN_1190	ACT domain-containing protein	4576	7548	3249	5081	5422	3022	4309	4305	3294	7752	4830	2598	6062	5251.5	4307	6291	0.866298	0.710492	1.03778			NWMN_2510	betaine aldehyde dehydrogenase	1.5395	0.764679	0.800631	SA2406	gbsA	NWMN_2510	betaine aldehyde dehydrogenase
NWMN_1191	transcriptional regulator Cro/CI	3668	4283	2128	3081	3390	1959	3756	3267	2516	5507	3382	1976	3975.5	3235.5	3511.5	4444.5	0.81386	0.883285	1.11797	S		NWMN_0850	hypothetical protein	0.605979	0.708337	0.8008	SA0840	-	NWMN_0850	hypothetical protein
NWMN_1192	CDP-diacylglycerol--glycerol-3-phosphate 3-phosphatidyltransferase	5020	6735	3182	4397	3378	2688	5079	4016	3210	6381	4857	2595	5877.5	3887.5	4547.5	5619	0.661421	0.773713	0.956019	I		NWMN_1044	iron compound ABC transporter	0.321698	0.444091	0.800843	SA0980	isdE	isdE	iron compound ABC transporter
NWMN_1193	competence-damage inducible protein cinA	2126	3010	889.8	2369	3653	1325	1774	1925	925.4	2224	1985	685.4	2568	3011	1849.5	2104.5	1.17251	0.72021	0.819509	I		NWMN_2508	hypothetical protein	0.674904	0.787612	0.800951	SA2404	-	NWMN_2508	hypothetical protein
NWMN_1194	recombinase A	15031	12398	2297	8181	11020	6407	13812	7382	4947	5561	8487	4340	13714.5	9600.5	10597	7024	0.700026	0.772686	0.512159	L		NWMN_1601	metallo-beta-lactamase super	0.807684	1.31106	0.800988	SA1529	-	NWMN_1601	metallo-beta-lactamase super
NWMN_1195	phosphodiesterase	2840	3784	2383	2567	2772	1979	3782	3097	3011	5022	4042	2379	3312	2669.5	3439.5	4532	0.806008	1.0385	1.36836	R		NWMN_0138	hypothetical protein	0.641559	0.806678	0.801094	SA0188	-	NWMN_0138	hypothetical protein
NWMN_1196	hypothetical protein	317.7	738.5	276.5	522	713.1	262.6	369.7	495.4	270.5	427.8	415.8	110.7	528.1	617.55	432.55	421.8	1.16938	0.819068	0.798712			NWMN_0450	DNA replication intiation control protein YabA	0.804152	0.76905	0.801156	SA0444	yabA	NWMN_0450	DNA replication intiation control protein YabA
NWMN_1197	hypothetical protein	2177	1538	496.9	1789	1747	671	1492	987.5	567	1778	1381	549.7	1857.5	1768	1239.75	1579.5	0.951817	0.667429	0.850336	S		NWMN_0372	alkyl hydroperoxide reductase subunit C	0.914092	0.768168	0.801332	SA0366	ahpC	ahpC	alkyl hydroperoxide reductase subunit C
NWMN_1198	pyruvate flavodoxin ferredoxin oxidoreductase alpha subunit	7260	10963	3048	5286	6874	3455	4396	5078	2656	5795	7083	2379	9111.5	6080	4737	6439	0.667289	0.519892	0.706689	C		NWMN_0105	capsular polysaccharide biosynthesis protein CapK	1.25681	0.88922	0.801349	SA0154	cap5K	capK	capsular polysaccharide biosynthesis protein CapK
NWMN_1199	2-oxoglutarate ferredoxin oxidoreductase subunit beta	6012	8742	4101	5191	6989	3088	3970	5348	3303	5197	7251	2734	7377	6090	4659	6224	0.825539	0.631558	0.843703	C		NWMN_1521	TPR domain-containing protein	0.713855	0.635994	0.801506	SA1448	-	NWMN_1521	TPR domain-containing protein
NWMN_1200	hypothetical protein	3589.14	5921.71	1941.57	2574.57	3728.14	1654.29	2575.43	2942.71	2054	3945.14	3844.29	1612.71	4755.43	3151.36	2759.07	3894.71	0.662686	0.580194	0.819004	S		NWMN_1040	neurofilament protein	0.62707	0.466316	0.801938	SA0976	isdB	isdB	neurofilament protein
NWMN_1201	tRNA-i(6)A37 modification enzyme MiaB	5342	4814	2998	4170	5928	3204	4303	5157	3474	6435	5810	2875	5078	5049	4730	6122.5	0.994289	0.931469	1.20569	J		NWMN_2575	histidinol-phosphate aminotransferase HisC2	0.66571	0.562954	0.801952	SA2469	hisC	hisC	histidinol-phosphate aminotransferase HisC2
NWMN_1202	hypothetical protein	3578	4455	2086	2653	3569	1926	3320	3043	1782	3912	3692	1716	4016.5	3111	3181.5	3802	0.774555	0.792108	0.946595	S		NWMN_0928	cytochrome c oxidase subunit III	0.989694	1.10139	0.802211	SA0911	qoxC	qoxC	cytochrome c oxidase subunit III
NWMN_1203	hypothetical protein	1475	1809.71	948.771	1002.89	1590.14	935.771	1295.31	1261.09	827.486	1576	1520.43	742.8	1642.36	1296.51	1278.2	1548.21	0.789423	0.778272	0.942678	S		NWMN_0573	hypothetical protein	0.922821	0.692947	0.802638	SA0558	ywqN	NWMN_0573	hypothetical protein
NWMN_1204	DNA mismatch repair protein	2511.57	3407	1197	2177.71	3699.57	1501.43	1621.71	2094	1082	2471.43	2523.14	919.386	2959.29	2938.64	1857.86	2497.29	0.993024	0.627806	0.843881	L		NWMN_0016	adenylosuccinate synthetase	1.24629	0.769138	0.802845	SA0016	purA	purA	adenylosuccinate synthetase
NWMN_1205	DNA mismatch repair protein HexB	1767	2265	995.2	1645	2462	1101	1261	1660	1127	2171	2263	889.1	2016	2053.5	1460.5	2217	1.0186	0.724454	1.0997	L		NWMN_0919	aminotransferase class I	0.695297	0.673647	0.803727	SA0902	patA	NWMN_0919	aminotransferase class I
NWMN_1206	glycerol uptake operon antiterminator regulatory protein	1176	1575	860.3	944.3	1505	813.5	1024	1030	939.6	1481	1492	735.2	1375.5	1224.65	1027	1486.5	0.890331	0.746638	1.0807	K		NWMN_1259	hypothetical protein	0.650111	0.703464	0.803979		-	NWMN_1259	hypothetical protein
NWMN_1207	glycerol uptake facilitator protein	28167	22773	12725	32498	29749	9858	22677	17874	9905	27990	20789	5589	25470	31123.5	20275.5	24389.5	1.22197	0.796054	0.957578	G		NWMN_0091	replication initiation protein	0.835719	0.749199	0.804315		dnaA2	NWMN_0091	replication initiation protein
NWMN_1208	glycerol kinase	4081	2069	1541	2832	2366	2149	3296	1629	1402	3268	2271	1492	3075	2599	2462.5	2769.5	0.845203	0.800813	0.90065	C		NWMN_0497	preprotein translocase subunit SecE	0.891014	0.614745	0.80456	SA0493	secE	secE	preprotein translocase subunit SecE
NWMN_1209	aerobic glycerol-3-phosphate dehydrogenase	12511	10708	8071	10248	11748	8331	9541	8492	7458	10457	10583	6645	11609.5	10998	9016.5	10520	0.947328	0.776648	0.906154	C		NWMN_2607	hypothetical protein	1.01815	0.604718	0.804653	SA2496	-	NWMN_2607	hypothetical protein
NWMN_1210	hydrolase alpha/beta fold domain-containing protein	2270	3309	616.3	2058	2114	916	1613	441.9	733.8	2812	1947	583	2789.5	2086	1027.45	2379.5	0.747804	0.368328	0.85302	I		NWMN_0005	DNA gyrase A subunit	0.823461	0.612937	0.80495	SA0006	gyrA	gyrA	DNA gyrase A subunit
NWMN_1211	tRNA delta(2)-isopentenylpyrophosphate transferase	2456.5	3542	1322.5	1466	2012	1192.5	2152.5	1693.5	1478	3681	2570	1197.25	2999.25	1739	1923	3125.5	0.579812	0.64116	1.04209	J		NWMN_1859	hypothetical protein	0.665807	0.756565	0.804954	SA1737	ykgB	NWMN_1859	hypothetical protein
NWMN_1212	host factor 1 protein	546.05	795.35	247.8	230.85	461.7	275.55	416.25	416.2	288.5	795.35	481.4	221.15	670.7	346.275	416.225	638.375	0.516289	0.620583	0.951804	R		NWMN_0787	aminotransferase	0.662553	0.898533	0.804971	SA0776	nifS	sufS	aminotransferase
NWMN_1213	glutathione peroxidase	14365	21246	10039	12362	17349	9234	14933	12760	9417	13630	15088	6794	17805.5	14855.5	13846.5	14359	0.834321	0.777653	0.806436	O		NWMN_1951	hypothetical protein	0.801962	0.837996	0.805629	SA1849	-	NWMN_1951	hypothetical protein
NWMN_1214	GTP-binding protein	1299.5	1553	440.65	1522	1608.5	951.55	940.05	539.505	497.65	1290.35	1087.5	537.05	1426.25	1565.25	739.777	1188.92	1.09746	0.518687	0.833602	R		NWMN_1925	integrase	0.740056	0.626721	0.805711	SA1810	int	int	integrase
NWMN_1215	hypothetical protein	1224	1395	651.8	1310	1480	1058	918.3	809.6	543.5	1799	1133	621.6	1309.5	1395	863.95	1466	1.06529	0.659756	1.11951	P		NWMN_1252	hypothetical protein	0.622481	0.866012	0.80628	SA1175	-	NWMN_1252	hypothetical protein
NWMN_1216	glutamine synthetase repressor	19716.3	19402.7	4179.57	12656.3	13873.6	5670.43	16932.6	7682.43	5769.14	11818	13004.4	4759.71	19559.5	13264.9	12307.5	12411.2	0.678183	0.629234	0.634536	K		NWMN_1111	aspartate carbamoyltransferase catalytic subunit PyrB	1.1874	0.458013	0.806303	SA1043	pyrB	pyrB	aspartate carbamoyltransferase catalytic subunit PyrB
NWMN_1217	glutamine synthetase	15079	13967	8333	8731	10450	6139	16084	10692	7912	13114	11813	7802	14523	9590.5	13388	12463.5	0.660366	0.921848	0.85819	E		NWMN_0985	hypothetical protein	0.934125	0.615488	0.806393	SA0970	-	NWMN_0985	hypothetical protein
NWMN_1218	hypothetical protein	493.5	638.5	326.4	184.2	218.7	309.4	266.4	293.4	329.5	425.8	450.3	265	566	201.45	279.9	438.05	0.355919	0.494523	0.77394			NWMN_2293	hypothetical protein	0.685883	0.73897	0.806414	SA2181	nreA	NWMN_2293	hypothetical protein
NWMN_1222	hypothetical protein	77.876	61.746	10.6684	55.506	65.018	22.472	29.918	20.4612	18.054	55.326	39.24	13.8264	69.811	60.262	25.1896	47.283	0.863216	0.360826	0.6773			NWMN_1213	glutathione peroxidase	0.834321	0.777653	0.806436	SA1146	bsaA	NWMN_1213	glutathione peroxidase
NWMN_1223	hypothetical protein	515.5	520.533	139.313	621.067	375.533	90.8333	622.123	277.93	130.387	458.967	264.917	76.64	518.017	498.3	450.027	361.942	0.961938	0.868749	0.698707	T		NWMN_0907	hypothetical protein	0.937822	0.708701	0.806777	SA0890	-	NWMN_0907	hypothetical protein
NWMN_1224	hypothetical protein	553.56	950.8	157.132	614.54	578.82	124.44	495.24	319.66	180.18	592.1	366.18	68.426	752.18	596.68	407.45	479.14	0.793268	0.541692	0.637002			NWMN_2118	hypothetical protein	0.795148	0.54962	0.806878		-	NWMN_2118	hypothetical protein
NWMN_1225	hypothetical protein	1485	1708	1512	915.1	972.9	593.7	1505	1134	1316	1644	1073	721.1	1596.5	944	1319.5	1358.5	0.591293	0.826495	0.850924	K		NWMN_0226	hypothetical protein	0.704998	0.80591	0.807084	SA0279	-	NWMN_0226	hypothetical protein
NWMN_1226	hypothetical protein	609.1	664.8	466	461.3	337.6	300	487.8	349	425.2	713.3	439.3	302.9	636.95	399.45	418.4	576.3	0.627129	0.65688	0.904781			NWMN_1248	30S ribosomal protein S14	0.96306	1.14363	0.807268	SA1171	rpsN	rpsN	30S ribosomal protein S14
NWMN_1228	hypothetical protein	960.6	1732	493.1	376.8	811.5	343	1038	2143	1023	1869	2538	854.8	1346.3	594.15	1590.5	2203.5	0.441321	1.18139	1.63671	E		NWMN_1503	enterotoxin	0.734371	0.593865	0.807412	SA1430	entA	NWMN_1503	enterotoxin
NWMN_1229	hypothetical protein	413.9	567.9	153.7	310.5	521.4	190.1	188.8	257	139.1	313.7	315.6	97.78	490.9	415.95	222.9	314.65	0.847321	0.454064	0.640966			NWMN_1576	threonyl-tRNA synthetase	0.507332	0.586046	0.807618	SA1506	thrS	thrS	threonyl-tRNA synthetase
NWMN_1230	cardiolipin synthetase	5076	8779	3216	5362	6486	2346	3601	4343	2793	5237	5236	1853	6927.5	5924	3972	5236.5	0.855143	0.573367	0.7559	I		NWMN_1502	hypothetical protein	0.8758	1.01013	0.807836	SA1428	-	NWMN_1502	hypothetical protein
NWMN_1231	ABC transporter ATP-binding protein	573.2	711.914	266.943	365.014	480.371	206.8	378.386	395.586	275.957	443.829	544.286	227.086	642.557	422.693	386.986	494.057	0.657829	0.602259	0.768892	V		NWMN_1242	homoserine kinase	0.692627	0.661442	0.808082	SA1166	thrB	thrB	homoserine kinase
NWMN_1232	ABC transporter permease protein	731.257	985.886	516.857	651.157	850.971	510.814	626.7	644.671	458.186	800.229	790.786	380.3	858.571	751.064	635.686	795.507	0.874784	0.740399	0.926547	V		NWMN_0811	NADH dehydrogenase	0.955767	0.952791	0.808672	SA0802	ndh	NWMN_0811	NADH dehydrogenase
NWMN_1233	histidine kinase	3319	3880	1729	2826	3904	2300	1979	2617	1530	3491	2817	1513	3599.5	3365	2298	3154	0.934852	0.638422	0.876233	T		NWMN_2175	molybdopterin biosynthesis moaB	1.01717	0.620471	0.80868	SA2070	moaB	moaB	molybdopterin biosynthesis moaB
NWMN_1234	two-component response regulator	1085	1458	847.9	960.1	1785	883.6	1127	842.4	856.7	871.7	1115	533.4	1271.5	1372.55	984.7	993.35	1.07947	0.77444	0.781243	T		NWMN_1699	type I restriction-modification enzyme S subunit EcoA	0.677412	0.594729	0.808845	SA1625	hsdS	hsdS	type I restriction-modification enzyme S subunit EcoA
NWMN_1235	hypothetical protein	1789	2085	1444	1546	1836	1408	2927	1926	2650	3739	3065	1926	1937	1691	2426.5	3402	0.872999	1.25271	1.75632			NWMN_1358	hypothetical protein	0.890734	0.747093	0.809038	SA1281	-	NWMN_1358	hypothetical protein
NWMN_1236	thermonuclease	387.2	373.4	191.1	362.7	373.4	207.3	330.7	265	210.7	365.3	281.6	136.4	380.3	368.05	297.85	323.45	0.967789	0.783197	0.850513	L		NWMN_0189	2-C-methyl-D-erythritol 4-phosphate cytidylyltransferase	0.910999	0.614312	0.809217	SA0245	ispD	ispD	2-C-methyl-D-erythritol 4-phosphate cytidylyltransferase
NWMN_1237	hypothetical protein	4702	6561	3332	3789	4307	2530	4761	4049	3684	5335	5134	2583	5631.5	4048	4405	5234.5	0.718814	0.782207	0.929504			NWMN_1417	6-phosphogluconate dehydrogenase	0.87286	0.71874	0.809315	SA1342	gnd	gnd	6-phosphogluconate dehydrogenase
NWMN_1238	hypothetical protein	3897	4153.57	1009.77	3579	2681.86	1199.86	3279	1295	1768.57	2461.6	2940.57	1633.43	4025.29	3130.43	2287	2701.09	0.777691	0.568158	0.67103			NWMN_2183	inosine-uridine preferring nucleoside hydrolase	1.06479	0.579116	0.809371	SA2078	-	NWMN_2183	inosine-uridine preferring nucleoside hydrolase
NWMN_1239	aspartate kinase (lysC1/ThrA)	5634	9279	2178	3692	6760	2346	3612	4504	1973	4648	4248	951.8	7456.5	5226	4058	4448	0.700865	0.544223	0.596527	E		NWMN_1451	glucokinase	0.550151	0.767175	0.810001	SA1377	glcK	glk	glucokinase
NWMN_1240	homoserine dehydrogenase	23902	31942	18151	15522	28039	22228	15548	20188	19051	19951	25694	18998	27922	21780.5	17868	22822.5	0.780048	0.639926	0.817366	E		NWMN_2186	acyl-CoA dehydrogenase-related protein	0.818135	1.06708	0.810102	SA2080	caiA	NWMN_2186	acyl-CoA dehydrogenase-related protein
NWMN_1241	threonine synthase	10738	12947	9138	5683	9518	10473	6951	8569	9043	9132	10294	8244	11842.5	7600.5	7760	9713	0.641799	0.655267	0.820182	E		NWMN_0616	iron compound ABC transporter ATP-binding protein	0.500551	0.722563	0.810266	SA0602	fhuA	fhuA	iron compound ABC transporter ATP-binding protein
NWMN_1242	homoserine kinase	18060.4	23475.9	14607.6	9607.14	19162	13829	13099.9	14374	14229	14406	19158.7	11680.4	20768.1	14384.6	13736.9	16782.4	0.692627	0.661442	0.808082	E		NWMN_0492	cysteinyl-tRNA synthetase	0.705031	0.561774	0.810406	SA0488	cysS	cysS	cysteinyl-tRNA synthetase
NWMN_1243	haloacid dehalogenase-like hydrolase	11200	14283	8003	6265	11636	8103	9864	9001	7845	9948	10919	6857	12741.5	8950.5	9432.5	10433.5	0.702468	0.740297	0.81886	R		NWMN_2015	UDP-GlcNAc 2-epimerase	0.777833	0.715542	0.810592	SA1913	mnaA	mnaA	UDP-GlcNAc 2-epimerase
NWMN_1244	hypothetical protein	3458	4876	2307	3363	3561	1763	4181	3370	2625	5069	3522	1374	4167	3462	3775.5	4295.5	0.830814	0.906048	1.03084			NWMN_2606	helix-turn-helix domain-containing protein	0.893834	0.686179	0.811094	SA2495	-	NWMN_2606	helix-turn-helix domain-containing protein
NWMN_1245	amino acid permease	9888.5	11983	4673.25	7785.5	10438.8	4315.25	6694.25	6430.25	4413.75	8189.5	8513.25	4249.25	10935.8	9112.12	6562.25	8351.38	0.833242	0.600073	0.763676	E		NWMN_0643	hypothetical protein	0.625423	0.739125	0.811927	SA0629	-	NWMN_0643	hypothetical protein
NWMN_1246	catalase	65177	65172	65160	65183	65181	65177	65161	65183	64875	65175	65181	65179	65174.5	65182	65172	65178	1.00012	0.999962	1.00005	P		NWMN_0446	thymidylate kinase	0.940034	0.770673	0.811976	SA0440	tmk	tmk	thymidylate kinase
NWMN_1247	50S ribosomal protein L33	3686	3774	4026	3623	3335	2744	4833	4380	3132	3710	3783	3108	3730	3479	4606.5	3746.5	0.932708	1.23499	1.00442	J		NWMN_2443	hypothetical protein	2.32455	0.557426	0.812455	SA2332	amiD2	NWMN_2443	hypothetical protein
NWMN_1248	30S ribosomal protein S14	747	584.9	315.3	505.5	777.2	597.3	1042	481.2	295.7	576.2	499	309.5	665.95	641.35	761.6	537.6	0.96306	1.14363	0.807268	J		NWMN_2002	hypothetical protein	0.971536	0.70901	0.812515	SA1900	ywpF	NWMN_2002	hypothetical protein
NWMN_1249	guanosine 5'-monophosphate oxidoreductase	374.433	225.533	109.593	270.733	256.333	185.293	199.93	117.737	115.213	212.07	191.12	113.297	299.983	263.533	158.833	201.595	0.878493	0.529474	0.672021	F		NWMN_0927	quinol oxidase subunit IV	1.20645	1.35797	0.812535	SA0910	qoxD	qoxD	quinol oxidase subunit IV
NWMN_1250	hypothetical protein	3276	5046	1423	3583	4153	1676	3078	3028	1804	4034	4032	1479	4161	3868	3053	4033	0.929584	0.733718	0.969238	S		NWMN_2302	acetyltransferase GNAT	1.0345	0.632466	0.812759	SA2190	-	NWMN_2302	acetyltransferase GNAT
NWMN_1251	LexA repressor	8015	9921	6739	4358	6719	4923	8798	8143	8114	10911	9734	6948	8968	5538.5	8470.5	10322.5	0.617585	0.944525	1.15104	K		NWMN_2339	hypothetical protein	0.882447	0.694386	0.812922	SA2229	potE	NWMN_2339	hypothetical protein
NWMN_1252	hypothetical protein	468.9	508.8	134	283.8	324.8	149.8	570.7	276	148	476.6	311.7	124	488.85	304.3	423.35	394.15	0.622481	0.866012	0.80628			NWMN_0314	hypothetical protein	0.852358	0.775328	0.813006	SA0310	-	NWMN_0314	hypothetical protein
NWMN_1253	hypothetical protein	11078	8683	2638	6672	7561	3408	5456	4565	2027	6631	5130	1646	9880.5	7116.5	5010.5	5880.5	0.720257	0.50711	0.595162	S		NWMN_1162	site-specific recombinase	0.888306	0.651728	0.813164	SA1095	xerC	xerC	site-specific recombinase
NWMN_1254	transketolase	11010.5	14600	6999	10184	15833.5	7632	11356	11072	6392	10821	13909	6176	12805.2	13008.8	11214	12365	1.01589	0.875735	0.96562	G		NWMN_1169	ribosome recycling factor	0.742862	0.83042	0.813177	SA1102	frr	frr	ribosome recycling factor
NWMN_1255	hypothetical protein	942.1	1169	638.4	1254	1237	580.2	1215	883.4	823.5	1308	1247	630.2	1055.55	1245.5	1049.2	1277.5	1.17995	0.993984	1.21027	S		NWMN_1858	aldehyde dehydrogenase	0.851552	0.735262	0.813467	SA1736	aldH	NWMN_1858	aldehyde dehydrogenase
NWMN_1256	hypothetical protein	595.786	610.157	224.313	602.557	609.629	328.214	625.529	433.473	238.824	820.586	540.5	258.267	602.971	606.093	529.501	680.543	1.00518	0.878152	1.12865	O		NWMN_2122	cobalt transport protein	0.868419	0.577678	0.813694	SA2019	ecfT	NWMN_2122	cobalt transport protein
NWMN_1257	exonuclease SbcD	717.4	887.2	226.2	597.9	685.4	222	564	335.3	242.8	752.3	607.8	199.2	802.3	641.65	449.65	680.05	0.799763	0.560451	0.847626	L		NWMN_0852	hypothetical protein	0.865616	0.674294	0.813782		-	NWMN_0852	hypothetical protein
NWMN_1258	exonuclease SbcC	1258.69	848.4	401.414	622.114	1263.91	345.014	481.971	218.129	410.757	198.043	450.014	556.514	1053.54	943.014	350.05	324.029	0.895089	0.33226	0.307561	L		NWMN_1599	CBS domain-containing protein	0.666007	0.580069	0.813815	SA1527	-	NWMN_1599	CBS domain-containing protein
NWMN_1259	hypothetical protein	3086	3699	1513	1252	3159	1800	2098	2675	2572	2569	2886	1334	3392.5	2205.5	2386.5	2727.5	0.650111	0.703464	0.803979			NWMN_2459	D-lactate dehydrogenase	0.804001	0.575051	0.813844	SA2346	ddh	NWMN_2459	D-lactate dehydrogenase
NWMN_1260	large conductance mechanosensitive channel	4580.5	5761.5	5178	3763	3644	3665	7372.5	6044.5	6066	6383	5896	4058.5	5171	3703.5	6708.5	6139.5	0.716206	1.29733	1.18729	M		NWMN_1720	hypothetical protein	0.63099	0.825562	0.813859		-	NWMN_1720	hypothetical protein
NWMN_1261	glycine betaine transporter	526.2	409	294.3	622.7	694.4	381.8	589.1	491.6	203.1	623.6	429.7	233.3	467.6	658.55	540.35	526.65	1.40836	1.15558	1.12628	M		NWMN_1724	ferrochelatase	0.759039	0.664385	0.81405	SA1651	hemH	hemH	ferrochelatase
NWMN_1263	aconitate hydratase	6170	6282	4172	3838	4829	3928	5405	4388	3841	6043	5189	3499	6226	4333.5	4896.5	5616	0.696033	0.78646	0.902024	C		NWMN_0641	LysR family transcriptional regulator	0.601896	0.591752	0.814142	SA0627	lysR	NWMN_0641	LysR family transcriptional regulator
NWMN_1264	hypothetical protein	3388	4785	2118	2811	3529	26090	3053	3119	2276	3842	3247	1504	4086.5	3170	3086	3544.5	0.775725	0.755169	0.867368	R		NWMN_0167	acetyl-CoA acetyltransferase	1.01668	0.724931	0.814304	SA0223	fadA	fadA	acetyl-CoA acetyltransferase
NWMN_1265	hypothetical protein	381.4	698.3	296.2	236.9	711.7	557.1	466.8	517.8	363	954.8	464.7	290.1	539.85	474.3	492.3	709.75	0.878577	0.91192	1.31472	S		NWMN_1579	transcriptional regulator NrdR	0.8395	0.602041	0.814516	SA1509	nrdR	nrdR	transcriptional regulator NrdR
NWMN_1266	hypothetical protein	2706	3206	1585	2481	3078	1922	3338	2501	2095	3879	2845	1500	2956	2779.5	2919.5	3362	0.940291	0.987652	1.13735	S		NWMN_2062	phosphoglucosamine mutase	0.699561	0.63958	0.814541	SA1965	glmM	glmM	phosphoglucosamine mutase
NWMN_1267	DNA topoisomerase IV subunit B	2974	1907	987	1998	2243	1420	1989	1243	811.6	2345	1641	944.3	2440.5	2120.5	1616	1993	0.868879	0.662159	0.816636	L		NWMN_1761	hypothetical protein	0.911228	0.695737	0.814555	SA1686	yfhP	NWMN_1761	hypothetical protein
NWMN_1268	DNA topoisomerase IV subunit A	1357	1433	771.7	1318	1548	938.9	1208	935.3	632.4	1953	1124	860	1395	1433	1071.65	1538.5	1.02724	0.768208	1.10287	L		NWMN_2495	pantoate--beta-alanine ligase	0.839974	0.651216	0.814696	SA2391	panC	panC	pantoate--beta-alanine ligase
NWMN_1269	sodium:alanine symporter	406	374.4	202.7	398.4	407.6	177	397.5	292.2	160.2	475.4	376.5	148.9	390.2	403	344.85	425.95	1.0328	0.883778	1.09162	E		NWMN_1882	phage phi LC3 family holin	1.66543	1.30753	0.814765	SA1760	-	NWMN_1882	phage phi LC3 family holin
NWMN_1270	transcription antiterminator	6841	10681	3394	6658	8103	3123	5110	5687	2600	9310	6656	2081	8761	7380.5	5398.5	7983	0.842427	0.616197	0.911197	K		NWMN_0693	hypothetical protein	0.84864	0.813405	0.81486	SA0680	-	NWMN_0693	hypothetical protein
NWMN_1271	hypothetical protein	13773	21202	7786	10598	15452	8066	12828	11821	7358	17155	15463	6184	17487.5	13025	12324.5	16309	0.744818	0.704761	0.932609	R		NWMN_2456	hypothetical protein	2.69364	0.7523	0.814943	SA2343	-	NWMN_2456	hypothetical protein
NWMN_1272	oxacillin resistance-related FmtC protein	17395	25817	15056	12736	19021	14492	6848	16479	11367	10509	21893	10376	21606	15878.5	11663.5	16201	0.734912	0.539827	0.749838	S		NWMN_1987	D-alanyl-alanine synthetase A	0.956277	0.632066	0.81525	SA1887	ddl	ddl	D-alanyl-alanine synthetase A
NWMN_1273	methionine sulfoxide reductase A	7411	10349	2138	7048	8437	3005	4936	5583	2258	6708	5803	1473	8880	7742.5	5259.5	6255.5	0.871903	0.592286	0.704448	O		NWMN_2209	hypothetical protein	0.801313	1.25883	0.815301	SA2101	yrhD	NWMN_2209	hypothetical protein
NWMN_1274	transcriptional regulator	557.2	705.3	274.1	599	774.5	504.3	712.6	432.4	333.4	626	478.1	253.6	631.25	686.75	572.5	552.05	1.08792	0.906931	0.874535	K		NWMN_2585	hypothetical protein	0.991282	1.03293	0.815382	SA2479	yceI	NWMN_2585	hypothetical protein
NWMN_1275	4-oxalocrotonate tautomerase	5277	7093	3901	4598	5302	3905	7680	6358	6434	8328	7995	4356	6185	4950	7019	8161.5	0.800323	1.13484	1.31956	R		NWMN_0008	seryl-tRNA synthetase	0.648194	0.837222	0.815463	SA0009	serS	serS	seryl-tRNA synthetase
NWMN_1276	ImpB/MucB/SamB family DNA-damage repair protein	1218	1051	536.9	448	732.5	502.4	679.8	631.6	461	898.2	771	473.9	1134.5	590.25	655.7	834.6	0.520273	0.577964	0.735654	L		NWMN_2205	D-isomer specific 2-hydroxyacid dehydrogenase NAD binding domain-containing protein	0.70776	0.813125	0.815812	SA2098	gyaR	NWMN_2205	D-isomer specific 2-hydroxyacid dehydrogenase NAD binding domain-containing protein
NWMN_1277	prephenate dehydrogenase	2162	3091	1603	1616	2318	1808	1950	1849	1545	2497	2038	1413	2626.5	1967	1899.5	2267.5	0.748905	0.723206	0.863316	E		NWMN_2253	EmrB/QacA family drug resistance transporter	0.936827	0.748071	0.815817	SA2142	-	NWMN_2253	EmrB/QacA family drug resistance transporter
NWMN_1278	hypothetical protein	2699	3928	1704	1959	2973	1831	2466	2598	1748	3310	3011	1499	3313.5	2466	2532	3160.5	0.744228	0.764147	0.953825	G		NWMN_2338	Na+/H+ antiporter	0.857154	0.591356	0.816118	SA2228	-	NWMN_2338	Na+/H+ antiporter
NWMN_1279	anthranilate synthase component I	1255.67	553.257	153.404	230.1	639.043	700.654	290.486	317.829	142.187	386.386	352.214	160.87	904.464	434.571	304.157	369.3	0.480474	0.336284	0.408308	E		NWMN_2039	hypothetical protein	0.623234	0.693884	0.816172	SA1937	-	NWMN_2039	hypothetical protein
NWMN_1280	anthranilate synthase component II	540.357	725.814	372.771	361.729	468.843	281.443	555.586	507.543	321.3	630.471	534.871	236.929	633.086	415.286	531.564	582.671	0.655971	0.83964	0.920367	E		NWMN_1929	succinyl-diaminopimelate desuccinylase	0.757613	0.914594	0.816289	SA1814	dapE	NWMN_1929	succinyl-diaminopimelate desuccinylase
NWMN_1281	anthranilate phosphoribosyltransferase	567.4	654.4	317.7	271.2	467.8	323.3	304.5	518.9	285.1	318.5	487.5	276.3	610.9	369.5	411.7	403	0.604845	0.673924	0.659682	E		NWMN_0478	2-amino-4-hydroxy-6-hydroxymethyldihydropteridine pyrophosphokinase	1.02782	0.617198	0.816486	SA0474	folK	folK	2-amino-4-hydroxy-6-hydroxymethyldihydropteridine pyrophosphokinase
NWMN_1282	indole-3-glycerol-phosphate synthase	731.633	778	423.8	296.433	538.3	532.133	465.533	472.067	426.767	397.067	528.833	348.767	754.817	417.367	468.8	462.95	0.552938	0.621078	0.613328	E		NWMN_1267	DNA topoisomerase IV subunit B	0.868879	0.662159	0.816636	SA1188	parE	parE	DNA topoisomerase IV subunit B
NWMN_1283	N-(5'phosphoribosyl)anthranilate isomerase	677.1	725.3	427.8	328.6	554.6	497.7	401.2	468.5	396.3	375.9	605.1	410.7	701.2	441.6	434.85	490.5	0.629778	0.620151	0.699515	E		NWMN_1657	lysophospholipase	0.700906	0.657198	0.81692	SA1584	pldB	NWMN_1657	lysophospholipase
NWMN_1284	tryptophan synthase subunit beta	965.5	855.8	663.9	446.5	0.01	673.9	571.3	613.4	509.4	574.8	624.5	502	910.65	223.255	592.35	599.65	0.24516	0.650469	0.658486	E		NWMN_0297	hypothetical protein	1.49485	1.8547	0.81701		-	NWMN_0297	hypothetical protein
NWMN_1285	tryptophan synthase subunit alpha	1375	1188	744.9	716.5	917.2	987.4	917.1	811.1	739	1193	1054	782.8	1281.5	816.85	864.1	1123.5	0.637417	0.674288	0.876707	E		NWMN_0588	staphylococcal accessory regulator A	0.975805	1.28395	0.817165	SA0573	sarA	sarA	staphylococcal accessory regulator A
NWMN_1286	methicillin resistance factor FemA	25740	14533	12321	10742	12773	12570	25955	9012	11478	16085	8010	11040	20136.5	11757.5	17483.5	12047.5	0.58389	0.868249	0.598292	V		NWMN_0079	GntR family transcriptional regulator	0.930535	0.775596	0.817276	SA0130	-	NWMN_0079	GntR family transcriptional regulator
NWMN_1287	methicillin resistance factor	15271	9155	11347	9047	8489	10138	20194	9234	8046	13991	9177	8905	12213	8768	14714	11584	0.717924	1.20478	0.948498	V		NWMN_1240	homoserine dehydrogenase	0.780048	0.639926	0.817366	SA1164	dhoM	metL	homoserine dehydrogenase
NWMN_1288	hydrolase-related protein	950.8	1443	329.4	957	1137	335	922.2	850.5	364.8	1304	906.8	204.3	1196.9	1047	886.35	1105.4	0.87476	0.740538	0.923553	R		NWMN_0522	hypothetical protein	0.769729	0.836973	0.817466	SA0518	azr	NWMN_0522	hypothetical protein
NWMN_1289	hypothetical protein	2604	3030	649.2	6.514	1678	1539	2231	1761	1763	111.8	1289	1488	2817	842.257	1996	700.4	0.298991	0.708555	0.248633	S		NWMN_0541	hypothetical protein	0.93977	0.827649	0.817884	SA0536	-	NWMN_0541	hypothetical protein
NWMN_1290	oligopeptide ABC transporter ATP-binding protein	4631	3278	2262	2873	3247	3635	3592	2406	2816	3857	2968	3038	3954.5	3060	2999	3412.5	0.773802	0.758377	0.862941	E		NWMN_0322	ascorbate-specific PTS system enzyme IIC	0.848721	0.704802	0.818043	SA0318	ulaA	ulaA	ascorbate-specific PTS system enzyme IIC
NWMN_1291	peptide ABC transporter ATP-binding protein	1433	1154	313.5	710.6	1191	1296	1050	756.6	978.2	938.7	1181	1079	1293.5	950.8	903.3	1059.85	0.73506	0.698338	0.819366	E		NWMN_1739	transcriptional regulator	0.890498	0.624945	0.818088	SA1665	-	NWMN_1739	transcriptional regulator
NWMN_1292	oligopeptide transporter permease	727.757	950.1	497.471	584.614	897.214	661.914	585.014	700.771	561.957	866.429	988.286	654.657	838.929	740.914	642.893	927.357	0.883167	0.766326	1.10541	E		NWMN_2220	hypothetical protein	0.921128	0.762273	0.818633	SAS085	-	NWMN_2220	hypothetical protein
NWMN_1293	oligopeptide transporter permease	667.7	826.7	369	543.2	685.3	614.4	579.5	633.3	499.9	872.4	804.1	511.6	747.2	614.25	606.4	838.25	0.822069	0.811563	1.12185	E		NWMN_0260	N-acetylmannosamine-6-phosphate 2-epimerase	0.867996	0.636161	0.818735	SA0307	nanE	nanE	N-acetylmannosamine-6-phosphate 2-epimerase
NWMN_1294	hypothetical protein	793.2	1136	379.7	837.3	939.9	497.6	754	509	449.8	659	758.1	378.2	964.6	888.6	631.5	708.55	0.921211	0.654676	0.734553	G		NWMN_1243	haloacid dehalogenase-like hydrolase	0.702468	0.740297	0.81886	SA1167	-	NWMN_1243	haloacid dehalogenase-like hydrolase
NWMN_1295	oligoendopeptidase F	2309.5	6785	1418.3	2056	3907	972.9	1969.5	2931.5	1299.4	2445.5	3004	772.625	4547.25	2981.5	2450.5	2724.75	0.655671	0.538897	0.599208	E		NWMN_1200	hypothetical protein	0.662686	0.580194	0.819004	SA1133	-	NWMN_1200	hypothetical protein
NWMN_1296	PhoU family transcriptional regulator	459.8	339.9	166.9	308.8	303.9	293	473.9	219.1	194.8	360.1	202.5	268.3	399.85	306.35	346.5	281.3	0.766162	0.866575	0.703514	P		NWMN_1494	hypothetical protein	0.742612	0.867666	0.819058	SA1420	-	NWMN_1494	hypothetical protein
NWMN_1297	phosphate ABC transporter ATP-binding protein	561.5	271.5	203.5	368.6	413	521.4	458.2	230.8	244.5	421.5	228.8	389.6	416.5	390.8	344.5	325.15	0.938295	0.827131	0.780672	P		NWMN_1437	biotin/lipoate A/B protein ligase	0.775631	0.675554	0.819294	SA1363	lipM	NWMN_1437	biotin/lipoate A/B protein ligase
NWMN_1298	phosphate ABC transporter permease protein	135.5	86.13	60.36	92.71	169.2	222.9	67.11	70.46	57.98	71.91	78.91	84.81	110.815	130.955	68.785	75.41	1.18174	0.620719	0.680504	P		NWMN_1344	cell wall associated fibronectin-binding protein	0.600587	0.733034	0.819358		ebh2	ebh2	cell wall associated fibronectin-binding protein
NWMN_1299	phosphate ABC transporter permease protein	83.29	51.88	31.55	69.27	152.1	119.5	24.25	35.66	28.87	28.17	35.01	31.28	67.585	110.685	29.955	31.59	1.63772	0.44322	0.467411	P		NWMN_1291	peptide ABC transporter ATP-binding protein	0.73506	0.698338	0.819366	SA1212	nikD	NWMN_1291	peptide ABC transporter ATP-binding protein
NWMN_1300	phosphate ABC transporter phosphate-binding protein PstS	310.7	169.9	178.55	190.75	403.8	399.1	210.8	141.57	134.75	168.055	140.39	134.57	240.3	297.275	176.185	154.222	1.2371	0.733188	0.641792	P		NWMN_1193	competence-damage inducible protein cinA	1.17251	0.72021	0.819509	SA1127	cinA	cinA	competence-damage inducible protein cinA
NWMN_1302	hypothetical protein	5321	6909	3791	5373	5570	3461	5837	3860	4083	6686	4749	2459	6115	5471.5	4848.5	5717.5	0.894767	0.792886	0.934996	S		NWMN_1679	hypothetical protein	0.774059	0.761002	0.819766	SA1607	-	NWMN_1679	hypothetical protein
NWMN_1303	ABC transporter ATP-binding protein	2176	1463	803	1627	1805	1027	2381	1187	632.4	3017	1437	557.9	1819.5	1716	1784	2227	0.943116	0.980489	1.22396	R		NWMN_0420	hypothetical protein	0.854372	0.73509	0.819843	SA0413	-	NWMN_0420	hypothetical protein
NWMN_1304	aspartate kinase II LysC	902.5	1064	569.7	596.7	955.3	658.3	678.2	741.8	510.9	976.8	890.1	413.7	983.25	776	710	933.45	0.789219	0.722095	0.949352	E		NWMN_1988	cell division protein	0.867411	0.758297	0.819977	SA1888	ftsW	NWMN_1988	cell division protein
NWMN_1305	aspartate semialdehyde dehydrogenase	3091	4854	1378	1823	3538	1773	1749	363.5	1114	1361	2614	1079	3972.5	2680.5	1056.25	1987.5	0.674764	0.26589	0.500315	E		NWMN_1241	threonine synthase	0.641799	0.655267	0.820182	SA1165	thrC	thrC	threonine synthase
NWMN_1306	dihydrodipicolinate synthase	5256	9233	3392	3269	6735	4442	2692	4625	3196	3853	5358	2538	7244.5	5002	3658.5	4605.5	0.690455	0.505004	0.635724	E		NWMN_0126	acetylglutamate kinase	0.783186	0.72576	0.820316	SA0176	argB	NWMN_0126	acetylglutamate kinase
NWMN_1307	dihydrodipicolinate reductase	1762	2561	1408	1049	2165	1329	1244	1644	1256	1284	1494	958.7	2161.5	1607	1444	1389	0.743465	0.668055	0.642609	E		NWMN_2601	integrase/recombinase	1.02266	0.845482	0.820521		-	NWMN_2601	integrase/recombinase
NWMN_1308	2,3,4,5-tetrahydropyridine-2-carboxylate N-succinyltransferase	2492.5	3273.5	1636.5	1251.5	2792	1394	1449	1789	1432.5	1366.5	2378.5	1128.55	2883	2021.75	1619	1872.5	0.701266	0.561568	0.649497	E		NWMN_0452	tetrapyrrole methylase	0.891489	0.60895	0.82061	SA0447	-	NWMN_0452	tetrapyrrole methylase
NWMN_1309	hippurate hydrolase	2792	3472	1787	1367	2645	1685	1687	1761	1350	2038	2579	1237	3132	2006	1724	2308.5	0.640485	0.550447	0.737069	R		NWMN_1605	acetate kinase	1.02909	1.0445	0.820618	SA1533	ackA	ackA	acetate kinase
NWMN_1310	alanine racemase	1665	1867	1209	815.4	1620	1111	994	1072	938.3	1524	1423	948.6	1766	1217.7	1033	1473.5	0.689524	0.584938	0.834371	M		NWMN_0835	Signal peptidase IA	1.1929	0.542335	0.820644	SA0825	spsA	spsA	Signal peptidase IA
NWMN_1311	diaminopimelate decarboxylase	1296	2008	954.6	992.9	1761	1276	1612	1156	1003	1517	1386	916	1652	1376.95	1384	1451.5	0.833505	0.837772	0.878632	E		NWMN_2359	transporter	0.62306	0.734535	0.82089	SA2250	-	NWMN_2359	transporter
NWMN_1312	hypothetical protein	2401	1556	1134	507.6	682.6	858.3	1580	795.6	355.5	894.9	677.5	536.1	1978.5	595.1	1187.8	786.2	0.300783	0.600354	0.397372	V		NWMN_0031	hypothetical protein	0.797021	0.832988	0.820898	SA0087	tFox	NWMN_0031	hypothetical protein
NWMN_1313	cold shock protein	4013	3951	3928	4219	3489	2337	7020	2748	3878	3110	4357	2699	3982	3854	4884	3733.5	0.967855	1.22652	0.937594	K		NWMN_1930	hypothetical protein	0.822826	0.691621	0.820988		-	NWMN_1930	hypothetical protein
NWMN_1314	hypothetical protein	786.3	1112	223.05	679.7	802.8	286.35	527.15	460.7	264.8	602.8	361.95	128.75	949.15	741.25	493.925	482.375	0.780962	0.520387	0.508218	S		NWMN_1981	potassium-translocating P-type ATPase B subunit	0.852107	0.650982	0.821214	SA1880	kdpB	kdpB	potassium-translocating P-type ATPase B subunit
NWMN_1315	acylphosphatase	10021.9	16346.1	3982.29	8842.29	12428.3	5279.43	8309.14	8116.29	5422.14	13508.1	13075.7	4152.86	13184	10635.3	8212.71	13291.9	0.806681	0.62293	1.00819	C		NWMN_1164	ATP-dependent protease ATP-binding subunit	0.868037	0.640946	0.822062	SA1097	hslU	hslU	ATP-dependent protease ATP-binding subunit
NWMN_1316	hypothetical protein	8513	12772	3729	6942	10718	3913	7636	8787	4135	10671	11219	3858	10642.5	8830	8211.5	10945	0.829692	0.771576	1.02842	R		NWMN_1583	DNA polymerase I	0.720211	0.698764	0.822163	SA1513	polA	polA	DNA polymerase I
NWMN_1317	tellurite resistance protein	10388	17640	5721	7884	12374	6028	10383	10352	6663	12436	12661	5183	14014	10129	10367.5	12548.5	0.722777	0.739796	0.895426	P		NWMN_1885	phi PVL orf 22-like protein	0.877151	1.39318	0.822335	SA1763	-	NWMN_1885	phi PVL orf 22-like protein
NWMN_1320	branched-chain amino acid transport system II carrier protein	803.1	1044	237.3	724.1	768.2	167.6	663.4	22.22	212.6	5.047	772.5	130.2	923.55	746.15	342.81	388.774	0.807915	0.371187	0.420956	E		NWMN_0706	hypothetical protein	0.974077	0.656286	0.822428	SA0692	-	NWMN_0706	hypothetical protein
NWMN_1321	hypothetical protein	1060	1418	888.2	649.5	1205	587.7	1525	992.9	579.4	1394	1279	517.4	1239	927.25	1258.95	1336.5	0.748386	1.0161	1.07869	P		NWMN_0921	MarR family transcriptional regulator	0.368762	0.575241	0.822441	SA0904	-	NWMN_0921	MarR family transcriptional regulator
NWMN_1322	CbbQ/NirQ/NorQ/GpvN	5180	5926	2372	2364	3715	2404	4031	3142	2128	4665	4212	1800	5553	3039.5	3586.5	4438.5	0.547362	0.645867	0.799298	R		NWMN_2063	hypothetical protein	0.67212	0.632961	0.822462	SA1966	-	NWMN_2063	hypothetical protein
NWMN_1324	hypothetical protein	31014	37977	19829	20538	29925	19546	23246	24146	17696	35716	31936	18117	34495.5	25231.5	23696	33826	0.731443	0.68693	0.980592	E		NWMN_2451	MmpL efflux pump	0.989785	0.691846	0.82267	SA2339	ydfJ	NWMN_2451	MmpL efflux pump
NWMN_1325	dihydrolipoamide acetyltransferase	46693	51632	37416	33425	43937	38797	42014	40773	37241	43165	48085	34587	49162.5	38681	41393.5	45625	0.786799	0.841973	0.928045	C		NWMN_2075	hypothetical protein	1.12371	0.739697	0.822949	SA1976	-	NWMN_2075	hypothetical protein
NWMN_1326	alpha-ketoglutarate decarboxylase	65176	65172	59787	64370	65180	65178	62283	63218	51291	58841	65186	58262	65174	64775	62750.5	62013.5	0.993878	0.962815	0.951507	C		NWMN_0072	NAD dependent epimerase/dehydratase	0.370607	0.57776	0.823095	SA0123	galE	NWMN_0072	NAD dependent epimerase/dehydratase
NWMN_1327	two-component sensor histidine kinase	21386	9721	10233	6291	7535	10127	22410	7340	8651	11022	7610	7331	15553.5	6913	14875	9316	0.444466	0.956376	0.598965	T		NWMN_1659	riboflavin synthase beta subunit	0.874777	0.931784	0.823127	SA1586	ribH	ribH	riboflavin synthase beta subunit
NWMN_1328	DNA-binding response regulator ArlR	14114	5533	6137	3902	4937	6335	13186	4246	5002	6477	4775	4759	9823.5	4419.5	8716	5626	0.449891	0.88726	0.572708	T		NWMN_2036	hypothetical protein	0.753253	0.631062	0.823161	SA1934	-	NWMN_2036	hypothetical protein
NWMN_1329	hypothetical protein	10422	7892	4449	6573	8038	5902	8338	5390	3681	6619	6851	4249	9157	7305.5	6864	6735	0.797805	0.74959	0.735503	I		NWMN_2434	hypothetical protein	0.864526	0.632929	0.823413	SA2323	aes	NWMN_2434	hypothetical protein
NWMN_1330	N-acetylglucosaminyl transferase	13059	7017	3868	6180	8154	5515	8619	5254	2987	6533	5881	3549	10038	7167	6936.5	6207	0.713987	0.691024	0.61835	M		NWMN_1760	A/G-specific adenine glycosylase	0.856038	0.675848	0.823474	SA1685	mutY	NWMN_1760	A/G-specific adenine glycosylase
NWMN_1331	acetyltransferase GNAT	15805	4305	3851	2771	3494	2546	6512	2032	1906	2298	2315	1911	10055	3132.5	4272	2306.5	0.311537	0.424863	0.229388	K		NWMN_1645	hypothetical protein	0.71191	1.22287	0.823887	SA1573	-	NWMN_1645	hypothetical protein
NWMN_1332	carboxyl-terminal protease	3125	4912	1313	2790	3431	1153	3354	3245	1334	3817	3399	786	4018.5	3110.5	3299.5	3608	0.774045	0.821078	0.897847	M		NWMN_0453	methionyl-tRNA synthetase	1.00916	0.658256	0.823888	SA0448	metS	metS	methionyl-tRNA synthetase
NWMN_1333	phosphotransferase system enzyme IIA	10525	15665	7614	13191	11005	7531	12701	9273	6353	14602	11824	7639	13095	12098	10987	13213	0.923864	0.839023	1.00901	G		NWMN_1722	hypothetical protein	0.798464	0.654416	0.824246	SA1649	-	NWMN_1722	hypothetical protein
NWMN_1334	methionine sulfoxide reductase B	18355	20522	13185	17223	16283	13929	20271	14977	10718	23303	16835	11442	19438.5	16753	17624	20069	0.861846	0.906654	1.03244	O		NWMN_0982	hypothetical protein	0.842455	0.717531	0.824279	SA0966	-	NWMN_0982	hypothetical protein
NWMN_1335	methionine sulfoxide reductase A	23074	21306.3	14318	17606.3	17788.7	15533.7	22080	14135.7	10377	21926.3	15322.3	12152.7	22190.2	17697.5	18107.8	18624.3	0.797538	0.81603	0.839306	O		NWMN_1834	hypothetical protein	0.97304	0.517733	0.82463	SA1712	-	NWMN_1834	hypothetical protein
NWMN_1336	hypothetical protein	26799	21233	11971	17473	17810	18057	22950	12640	10708	20548	15877	13648	24016	17641.5	17795	18212.5	0.734573	0.740964	0.758349	S		NWMN_2120	50S ribosomal protein L13	0.990602	0.698971	0.824995	SA2017	rplM	rplM	50S ribosomal protein L13
NWMN_1337	dihydrofolate reductase	65172	39499	32978	26442	35371	46347	42853	26392	21825	31909	26008	24928	52335.5	30906.5	34622.5	28958.5	0.590546	0.661549	0.553324	H		NWMN_0925	hypothetical protein	0.822186	0.577809	0.825209	SA0908	-	NWMN_0925	hypothetical protein
NWMN_1338	thymidylate synthase	45785	14781	15406	9983	13629	21610	25895	11420	11355	12432	10966	12546	30283	11806	18657.5	11699	0.389856	0.616105	0.386322	F		NWMN_1593	6-phosphofructokinase	0.870913	0.701954	0.825264	SA1521	pfkA	pfk	6-phosphofructokinase
NWMN_1339	hypothetical protein	7358	9871	4420	6406	8767	4962	6743	5797	4385	8473	7324	3525	8614.5	7586.5	6270	7898.5	0.880666	0.727843	0.916884			NWMN_2052	resolvase	0.701911	0.623355	0.825372		-	NWMN_2052	resolvase
NWMN_1340	hypothetical protein	6764.29	8797.43	3923.57	5648.43	7594.86	3596	5710	5216	3166.86	7875.57	6625	2731	7780.86	6621.64	5463	7250.29	0.851017	0.702108	0.931811	C		NWMN_1410	pyrroline-5-carboxylate reductase	0.679819	0.608435	0.825421	SA1334	proC	NWMN_1410	pyrroline-5-carboxylate reductase
NWMN_1341	hypothetical protein	8735.5	13232.5	4421	7901	12173.5	6333.5	7570.5	7212.5	4410	9828.5	8503	3485.5	10984	10037.2	7391.5	9165.75	0.913806	0.672933	0.834464	O		NWMN_1182	30S ribosomal protein S15	0.817481	1.00671	0.82554	SA1116	rpsO	rpsO	30S ribosomal protein S15
NWMN_1342	hypothetical protein	517.4	369.5	155.6	413.2	360.1	188.9	321.6	260.6	152	517.5	281.6	139.4	443.45	386.65	291.1	399.55	0.871913	0.656444	0.901003	S		NWMN_0255	pyrimidine nucleoside transporter	1.036	0.764358	0.825696	SA0302	nupC	NWMN_0255	pyrimidine nucleoside transporter
NWMN_1343	hypothetical protein	656.5	1035	253.4	617.4	593.4	165.8	477.2	465	229.1	717.9	427.3	131.3	845.75	605.4	471.1	572.6	0.715814	0.55702	0.677032	L		NWMN_2426	sortase	0.80611	0.788938	0.826078	SA2316	srtA	srtA	sortase
NWMN_1344	cell wall associated fibronectin-binding protein	267.414	263.471	163.357	146.886	171.957	184.486	209.743	179.414	154.043	269.014	165.971	188.757	265.443	159.421	194.579	217.493	0.600587	0.733034	0.819358			NWMN_0666	ebsC protein	0.837527	0.575451	0.826313	SA0652	ybaK	NWMN_0666	ebsC protein
NWMN_1345	hypothetical protein	585.8	416.1	124	251.1	333.4	215.9	308.1	2.026	198.5	106.9	416.7	254.2	500.95	292.25	155.063	261.8	0.583392	0.309538	0.522607			NWMN_0748	carboxylesterase	0.882543	0.566979	0.826323	SA0734	est	NWMN_0748	carboxylesterase
NWMN_1346	major facilitator transporter	2104.57	1973.14	1644	656.957	880.229	883.914	2344.29	1855.71	2429.29	3364.86	4223.86	3705.14	2038.86	768.593	2100	3794.36	0.376972	1.02999	1.86102	G		NWMN_0983	hypothetical protein	0.790066	0.68025	0.826327	SA0967	-	NWMN_0983	hypothetical protein
NWMN_1347	amino acid permease	5639	4678.5	4745	1406.4	2694.5	2335.5	5562.5	5627	7217	7725.5	8782	10018	5158.75	2050.45	5594.75	8253.75	0.39747	1.08452	1.59995	E		NWMN_0809	hypothetical protein	0.888682	0.881314	0.826548	SA0799	ndh2	NWMN_0809	hypothetical protein
NWMN_1348	threonine dehydratase	8103	7458	8935	1909	3867	3886	5017	8906	11526	11417	14753	17932	7780.5	2888	6961.5	13085	0.371184	0.894737	1.68177	E		NWMN_0088	5' nucleotidase	0.799855	0.657173	0.826664	SA0140	ushA	NWMN_0088	5' nucleotidase
NWMN_1349	alanine dehydrogenase	8763	8941	7673	2025	4502	3759	6912	9248	11050	12205	16489	17118	8852	3263.5	8080	14347	0.368674	0.912788	1.62076	E		NWMN_1448	competence protein ComGA-like protein	0.730188	0.825166	0.827586	SA1374	comGA	NWMN_1448	competence protein ComGA-like protein
NWMN_1350	5'-3' exonuclease	3246	4737	2423	2407	2906	2267	3422	2538	2644	4746	4013	2485	3991.5	2656.5	2980	4379.5	0.665539	0.746586	1.09721	L		NWMN_0705	ferrichrome ABC transporter lipoprotein	0.780436	0.640396	0.82774	SA0691	sstD	NWMN_0705	ferrichrome ABC transporter lipoprotein
NWMN_1351	hypothetical protein	3882	3924	2059	1994	2387	2199	3298	2290	2061	4630	2897	1781	3903	2190.5	2794	3763.5	0.561235	0.71586	0.964258	R		NWMN_1937	chaperonin GroEL	0.722424	0.668468	0.828032	SA1836	groEL	groEL	chaperonin GroEL
NWMN_1352	hypothetical protein	308.4	113.6	90.66	164	173.8	115.7	225.7	136.1	144.4	245.9	170.4	175.3	211	168.9	180.9	208.15	0.800474	0.857346	0.986493	S		NWMN_2191	urease accessory protein UreE	0.928425	0.823117	0.828195	SA2085	ureE	ureE	urease accessory protein UreE
NWMN_1353	hypothetical protein	935	1068	349.3	571.5	1104	781.1	831.1	631.7	399.3	1131	692.8	425.3	1001.5	837.75	731.4	911.9	0.836495	0.730305	0.910534			NWMN_1051	ribonuclease HIII	0.90002	0.372067	0.828373	SA0987	rnhC	NWMN_1051	ribonuclease HIII
NWMN_1354	hypothetical protein	588.4	412.4	143.8	454.3	522.3	213.8	500	302	153.8	497.8	336.4	174.2	500.4	488.3	401	417.1	0.975819	0.801359	0.833533	L		NWMN_0904	hypothetical protein	0.77488	0.795058	0.828415	SA0889	-	NWMN_0904	hypothetical protein
NWMN_1355	hypothetical protein	24266	29793	34397	28862	22229	17476	65155	39823	38904	37656	37140	32771	27029.5	25545.5	52489	37398	0.945097	1.94192	1.3836			NWMN_0814	two-component response regulator/competence factor transporting ATP-binding/permease protein	0.821637	0.536317	0.828618	SA0805	-	NWMN_0814	two-component response regulator/competence factor transporting ATP-binding/permease protein
NWMN_1357	hypothetical protein	24601	24601	12328	18550	21057	15406	27257	20093	14313	26179	20993	14339	24601	19803.5	23675	23586	0.804988	0.962359	0.958742	S		NWMN_2292	hypothetical protein	0.706761	0.776391	0.828982	SA2180	nreB	NWMN_2292	hypothetical protein
NWMN_1358	hypothetical protein	16290	23100	6850	15317	19769	6938	16058	13370	6775	12804	19064	5927	19695	17543	14714	15934	0.890734	0.747093	0.809038			NWMN_2101	NAD-dependent deacetylase	0.821138	0.669715	0.829522	SA1999	-	NWMN_2101	NAD-dependent deacetylase
NWMN_1360	Holliday junction-specific endonuclease	12228	10438	5112	10920	14896	13164	6278	8004	6135	10250	11112	8674	11333	12908	7141	10681	1.13897	0.630107	0.942469	R		NWMN_0002	DNA polymerase III subunit beta	0.699491	0.647726	0.829746	SA0002	dnaN	dnaN	DNA polymerase III subunit beta
NWMN_1361	penicillin-binding protein 2	18316.5	19760	10070	16737.5	26655.5	17788	10979.5	14554.5	10889	15853.5	20459.5	14289	19038.2	21696.5	12767	18156.5	1.13963	0.670597	0.953685	M		NWMN_0038	hypothetical protein	0.936061	0.707079	0.829884	SA0088	-	NWMN_0038	hypothetical protein
NWMN_1362	hypothetical protein	1912	2976	1150	1823	2131	1208	2015	1858	1092	2878	2067	1065	2444	1977	1936.5	2472.5	0.80892	0.792349	1.01166			NWMN_2227	Na+/H+ antiporter	0.906308	0.596243	0.829885	SA2117	metT	NWMN_2227	Na+/H+ antiporter
NWMN_1363	endonuclease III	1501	1735	838.6	1481	1861	1063	1517	1284	691.2	2328	1659	843.2	1618	1671	1400.5	1993.5	1.03276	0.865575	1.23208	L		NWMN_2611	tRNA uridine 5-carboxymethylaminomethyl modification enzyme GidA	0.70587	0.595572	0.830997	SA2500	gidA	gidA	tRNA uridine 5-carboxymethylaminomethyl modification enzyme GidA
NWMN_1364	DNA replication protein DnaD	5278	6539	1742	4998	5584	3111	3890	3196	1860	5497	3873	1988	5908.5	5291	3543	4685	0.89549	0.599645	0.792925	L		NWMN_0978	cell division protein	0.764907	0.668001	0.831374	SA0962	ftsW	NWMN_0978	cell division protein
NWMN_1365	asparaginyl-tRNA synthetase	4688	5098.86	1650.14	5618.14	5649.86	1975.86	6174.86	3790.29	1574.71	6664.86	4938.43	1343.14	4893.43	5634	4982.57	5801.64	1.15134	1.01822	1.1856	J		NWMN_0866	tryptophanyl-tRNA synthetase	0.864424	0.831597	0.831435	SA0855	trpS	trpS	tryptophanyl-tRNA synthetase
NWMN_1366	DnaQ family exonuclease/DinG family helicase	2256.6	2710.2	1183.8	1524.64	2361.6	907.32	2037.8	1941.4	1238.6	2709.6	2224.8	895.72	2483.4	1943.12	1989.6	2467.2	0.782443	0.80116	0.993477	L		NWMN_0339	Sec-independent protein translocase TatC	0.614965	0.538776	0.831901	SA0334	tatC	NWMN_0339	Sec-independent protein translocase TatC
NWMN_1367	BirA bifunctional protein	2327.5	3534.5	1083.5	1879.5	2528.5	911.95	1854	2092.5	1070.7	3013.5	2370	719.8	2931	2204	1973.25	2691.75	0.751962	0.673234	0.918373	H		NWMN_0174	hypothetical protein	0.864026	1.1416	0.832077	SA0230	-	NWMN_0174	hypothetical protein
NWMN_1368	tRNA CCA-pyrophosphorylase	833.8	957.9	432.4	496.7	807.3	475.4	591.3	648.5	372.6	951.1	765.6	359.1	895.85	652	619.9	858.35	0.7278	0.691969	0.95814	J		NWMN_1432	acetyl-CoA carboxylase biotin carboxyl carrier protein	0.998599	0.65256	0.832126	SA1358	accB	accB	acetyl-CoA carboxylase biotin carboxyl carrier protein
NWMN_1369	glycosyl transferase group 1	1569.29	1698.86	739.929	1224.57	1327.57	870.286	1122.54	1007.94	646.6	1457.29	1312.43	797.943	1634.07	1276.07	1065.24	1384.86	0.780915	0.651895	0.847489	M		NWMN_1570	hypothetical protein	0.712646	0.628371	0.832851	SA1500	-	NWMN_1570	hypothetical protein
NWMN_1370	hypothetical protein	747.2	853.35	267.4	692	722.9	310.4	543.5	471.25	311.6	776.2	558.95	236.5	800.275	707.45	507.375	667.575	0.884009	0.634001	0.834182	R		NWMN_1490	DNA internalization-related competence protein ComEC/Rec2	0.528904	0.686246	0.832855	SA1416	comEC	comEC	DNA internalization-related competence protein ComEC/Rec2
NWMN_1371	hypothetical protein	29323	37220	7773	25723	26730	20108	27293	1685	21456	23651	36200	21734	33271.5	26226.5	14489	29925.5	0.788257	0.435478	0.899433	R		NWMN_2482	hypothetical protein	0.91068	0.713642	0.833135	SA2369	-	NWMN_2482	hypothetical protein
NWMN_1372	hypothetical protein	1857	1778	1029	1304	1703	1454	1499	877.6	1081	2010	1672	980	1817.5	1503.5	1188.3	1841	0.827235	0.65381	1.01293	S		NWMN_2470	hypothetical protein	0.756825	0.710266	0.833361	SA2357	pfoS/R	NWMN_2470	hypothetical protein
NWMN_1373	hypothetical protein	3018	2603	1217	1254	2013	1682	1590	1400	1075	2195	1965	1024	2810.5	1633.5	1495	2080	0.581213	0.531934	0.740082	S		NWMN_1973	sigmaB regulation protein RsbU	0.767367	0.662146	0.83343	SA1872	rsbU	rsbU	sigmaB regulation protein RsbU
NWMN_1374	hypothetical protein	4692.57	4236.29	1767.4	2505.71	3802.29	2667.57	2691.86	788.937	2248.29	2162.34	3527.14	2115.29	4464.43	3154	1740.4	2844.74	0.706473	0.389836	0.637202	R		NWMN_0853	3-oxoacyl-(acyl carrier protein) synthase III	0.970941	0.712643	0.833518	SA0842	FabH	NWMN_0853	3-oxoacyl-(acyl carrier protein) synthase III
NWMN_1375	3-phosphoshikimate 1-carboxyvinyltransferase	3324	2938	1687	1763	2919	2193	1752	2123	1656	2688	2872	1520	3131	2341	1937.5	2780	0.747684	0.618812	0.887895	E		NWMN_1354	hypothetical protein	0.975819	0.801359	0.833533	SA1277	-	NWMN_1354	hypothetical protein
NWMN_1376	3-dehydroquinate synthase	3543	3655	1346	2818	3669	1634	1810	2427	1380	3058	3133	1058	3599	3243.5	2118.5	3095.5	0.901223	0.588636	0.8601	E		NWMN_1214	GTP-binding protein	1.09746	0.518687	0.833602	SA1147	hflX	NWMN_1214	GTP-binding protein
NWMN_1377	chorismate synthase	3280	4085	1102	2588	4022	1778	1847	2235	976.8	2667	2683	778.1	3682.5	3305	2041	2675	0.897488	0.554243	0.726409	E		NWMN_0665	hypothetical protein	1.07621	0.759559	0.83361	SA0651	-	NWMN_0665	hypothetical protein
NWMN_1378	nucleoside diphosphate kinase	1387.8	1594.1	457.265	1645.15	1174.35	215.89	1822.45	781.65	521.685	1650.25	900.38	241.855	1490.95	1409.75	1302.05	1275.32	0.945538	0.873302	0.855371	F		NWMN_0021	metallo-beta-lactamase super	1.02317	0.735381	0.833748	SA0021	yycJ	NWMN_0021	metallo-beta-lactamase super
NWMN_1379	heptaprenyl diphosphate syntase component II	5102	5876	2739	5917	5415	2163	5435	3748	2073	7962	4484	1306	5489	5666	4591.5	6223	1.03225	0.836491	1.13372	H		NWMN_1435	hypothetical protein	0.734772	0.665243	0.833912	SA1361	-	NWMN_1435	hypothetical protein
NWMN_1380	ubiquinone/menaquinone biosynthesis methyltransferase	7435	12281	4941	11058	10332	4581	9264	6805	4131	13380	7702	3083	9858	10695	8034.5	10541	1.08491	0.815023	1.06928	H		NWMN_1849	hypothetical protein	0.849278	0.860867	0.834097	SA1727	-	NWMN_1849	hypothetical protein
NWMN_1381	hypothetical protein	9783	10792	3626	10144	10457	3608	8686	6036	3216	11778	7124	2228	10287.5	10300.5	7361	9451	1.00126	0.715529	0.918688			NWMN_1370	hypothetical protein	0.884009	0.634001	0.834182	SA1292	mazG	NWMN_1370	hypothetical protein
NWMN_1382	DNA-binding protein HU	62682	65174	65151	65183	49954	30650	65163	65185	65182	65178	65178	65178	63928	57568.5	65174	65178	0.900521	1.01949	1.01955	L		NWMN_1120	guanylate kinase	0.96773	0.773581	0.834369	SA1052	gmk	gmk	guanylate kinase
NWMN_1383	glycerol-3-phosphate dehydrogenase NAD-dependent	5605.43	7158.43	3592.71	5294.29	7201.14	4304.29	4658.86	5035.43	2682.71	7984.43	6099.57	2650.86	6381.93	6247.71	4847.14	7042	0.97897	0.759511	1.10343	C		NWMN_1310	alanine racemase	0.689524	0.584938	0.834371	SA1231	dal	alr2	alanine racemase
NWMN_1384	GTP-binding protein EngA	5354	6824	1913	5474	6504	2904	4188	3973	1965	6633	4302	1581	6089	5989	4080.5	5467.5	0.983577	0.670143	0.897931	R		NWMN_1341	hypothetical protein	0.913806	0.672933	0.834464	SA1263	-	NWMN_1341	hypothetical protein
NWMN_1385	30S ribosomal protein S1	21428.3	31736.1	17688.4	15049.3	18607.7	12567.1	30435.4	27156.7	21993.3	28134.7	30588	19533.6	26582.2	16828.5	28796.1	29361.4	0.633074	1.08328	1.10455	J		NWMN_1935	phage terminase small subunit	0.919808	0.642792	0.834933	SA1820	-	NWMN_1935	phage terminase small subunit
NWMN_1386	cytidylate kinase	1466	2254	654.8	1375	1723	665.6	1568	1322	667.8	1975	1369	390	1860	1549	1445	1672	0.832796	0.776882	0.898925	F		NWMN_2065	arginase	0.830467	0.70626	0.834942	SA1968	arg	NWMN_2065	arginase
NWMN_1387	L-asparaginase	227	200.8	76.94	145	295.3	98.52	142.2	157.5	66.95	384.5	118.8	45.02	213.9	220.15	149.85	251.65	1.02922	0.700561	1.17648	E		NWMN_1462	hypothetical protein	0.881756	0.803829	0.835154	SA1388	-	NWMN_1462	hypothetical protein
NWMN_1388	pyridine nucleotide-disulphide oxidoreductase	1019	1288	503.8	1032	1153	625.1	713.2	630.5	412.4	971.3	754	482.8	1153.5	1092.5	671.85	862.65	0.947117	0.582445	0.747854	O		NWMN_2281	transcriptional regulator	0.703368	0.719383	0.835846		araC	NWMN_2281	transcriptional regulator
NWMN_1389	elastin binding protein	65176.3	65171.4	51444.9	34540.4	53115.4	52794.7	62252.9	58464.7	44150	45950.3	54990.6	42768.3	65173.9	43827.9	60358.8	50470.4	0.672477	0.92612	0.774397			NWMN_0363	hypothetical protein	0.861613	0.952575	0.835957	SA0358	-	NWMN_0363	hypothetical protein
NWMN_1390	ATP-dependent DNA helicase RecQ	9906	6529	3476	4646	6800	6296	5955	5091	3479	5482	4687	3232	8217.5	5723	5523	5084.5	0.696441	0.672102	0.61874	L		NWMN_0790	hypothetical protein	0.874639	1.10462	0.83658	SA0779	-	NWMN_0790	hypothetical protein
NWMN_1391	hypothetical protein	3237	3265	975.5	1929	2431	1105	2034	1983	1204	3002	2438	1047	3251	2180	2008.5	2720	0.670563	0.61781	0.836666	S		NWMN_1391	hypothetical protein	0.670563	0.61781	0.836666	SA1314	ypbB	NWMN_1391	hypothetical protein
NWMN_1392	ferredoxin	2836.5	3748	1725.5	2835	3517.5	2312.5	2010	2432.5	1916.5	3438	3463	1529.5	3292.25	3176.25	2221.25	3450.5	0.964766	0.674691	1.04807	C		NWMN_1103	isoleucyl-tRNA synthetase	0.804491	0.743487	0.836687	SA1036	ileS	ileS	isoleucyl-tRNA synthetase
NWMN_1393	hypothetical protein	2973.09	4699.09	1734.09	4086.91	3529.18	1453.82	3936.36	2469.18	1686.91	4074	3272.09	1210.36	3836.09	3808.05	3202.77	3673.05	0.992689	0.834905	0.957497	S		NWMN_1871	hypothetical protein	0.812497	0.680639	0.836687	SA1749	-	NWMN_1871	hypothetical protein
NWMN_1394	hypothetical protein	422.8	453.7	127.8	304.6	427.3	256.2	408.3	281.1	276.1	572.2	355.4	221	438.25	365.95	344.7	463.8	0.835026	0.786537	1.0583			NWMN_2127	30S ribosomal protein S11	0.863079	0.684674	0.836972	SA2024	rpsK	rpsK	30S ribosomal protein S11
NWMN_1397	hypothetical protein	998.28	1485.8	528.28	1359.42	2177.8	1095.74	954.46	1009.84	549.32	934.16	1014.76	400.5	1242.04	1768.61	982.15	974.46	1.42396	0.790756	0.784564			NWMN_0224	hypothetical protein	0.665883	0.76894	0.837185	SA0277	esaC	NWMN_0224	hypothetical protein
NWMN_1398	hypothetical protein	1526	2560	794.7	2618	4865	2008	1125	1300	981.7	990.9	1644	610.5	2043	3741.5	1212.5	1317.45	1.83138	0.59349	0.64486			NWMN_0611	glycerol-3-phosphate cytidylyltransferase	0.633227	0.755242	0.837798	SA0597	tagD	tagD	glycerol-3-phosphate cytidylyltransferase
NWMN_1399	staphylococcal respiratory response protein SrrB	7232.67	6985.67	3136.33	5039.33	7055	3500.33	5219.67	4829.33	3019.67	7318.67	6226.67	2744.67	7109.17	6047.17	5024.5	6772.67	0.850615	0.706764	0.952667	T		NWMN_1840	high affinity proline permease	0.89032	0.633601	0.837948	SA1718	putP	putP	high affinity proline permease
NWMN_1400	DNA-binding response regulator SsrA	19284	16149	9682	16183	16003	9951	16937	12356	10611	24063	15671	9369	17716.5	16093	14646.5	19867	0.908362	0.826715	1.12138	T		NWMN_1916	hypothetical protein	0.671359	0.729047	0.838032		-	NWMN_1916	hypothetical protein
NWMN_1401	ribosomal large subunit pseudouridine synthase B	4859	4796	2500	3718	4899	2773	3817	2927	1982	5526	3750	1839	4827.5	4308.5	3372	4638	0.892491	0.698498	0.960746	J		NWMN_1723	protoporphyrinogen oxidase	0.895237	0.598701	0.83855	SA1650	hemY	hemY	protoporphyrinogen oxidase
NWMN_1402	segregation and condensation protein B	5267.57	5527.43	2789.43	4077.86	5238.71	3262.57	4023	3547.71	2468.43	5732.14	4361.57	2170.57	5397.5	4658.29	3785.36	5046.86	0.863045	0.701317	0.935036	K		NWMN_0080	purine nucleoside phosphorylase	0.844241	0.532616	0.838644	SA0131	pnp	pnp	purine nucleoside phosphorylase
NWMN_1403	hypothetical protein	5809	5805	2836	4536	5479	3766	3867	3699	2371	5891	3974	2051	5807	5007.5	3783	4932.5	0.862321	0.651455	0.849406	S		NWMN_0788	nitrogen fixation protein NifU-like protein	0.74475	0.853238	0.838705	SA0777	nifU	nifU	nitrogen fixation protein NifU-like protein
NWMN_1404	hypothetical protein	934.5	1388	139	898.7	1033	499.9	700.7	577	281.8	485.8	734.3	218.5	1161.25	965.85	638.85	610.05	0.831733	0.55014	0.525339	S		NWMN_1644	dipeptidase PepV	0.674122	0.558729	0.838926	SA1572	pepV	NWMN_1644	dipeptidase PepV
NWMN_1405	integrase/recombinase XerD	3035	4188	1603	2770	3019	1384	3422	2408	1581	4701	3619	1499	3611.5	2894.5	2915	4160	0.801468	0.807144	1.15188	L		NWMN_1941	hypothetical protein	0.865524	0.658987	0.839003	SA1840	-	NWMN_1941	hypothetical protein
NWMN_1406	transcriptional regulator Fur	12270	13991	5426	9062	10727	7471	9105	8402	5716	13542	11106	5962	13130.5	9894.5	8753.5	12324	0.753551	0.666654	0.938578	P		NWMN_0819	CPA3 family monovalent cation:proton (H+) antiporter-3 subunit D (mnhD2)	0.771243	0.669899	0.839164	SA0810	mnhD	mnhD	CPA3 family monovalent cation:proton (H+) antiporter-3 subunit D (mnhD2)
NWMN_1407	NUDIX domain-containing protein	2741.43	4008.86	1298.29	2299.71	3246.71	1474.43	2273.86	1823.71	1321.43	2366.57	2871.43	1071.71	3375.14	2773.21	2048.79	2619	0.821658	0.607022	0.775967	L		NWMN_1735	hypothetical protein	0.664108	0.642938	0.839293	SA1661	-	NWMN_1735	hypothetical protein
NWMN_1408	aldo/keto reductase	1778.14	2101.14	998.086	1701	2280.86	1177.54	1463.71	1569.29	967.343	2093.29	2051.57	950.686	1939.64	1990.93	1516.5	2072.43	1.02644	0.781845	1.06846	C		NWMN_1335	methionine sulfoxide reductase A	0.797538	0.81603	0.839306	SA1257	msrA	msrA	methionine sulfoxide reductase A
NWMN_1409	short-chain oxidoreductase	3977	5142	1903	2898	4250	1865	3182	2730	1669	3383	3243	1067	4559.5	3574	2956	3313	0.783858	0.648317	0.726615	R		NWMN_0657	oxidoreductase	0.838773	0.744487	0.840047	SA0643	-	NWMN_0657	oxidoreductase
NWMN_1410	pyrroline-5-carboxylate reductase	16823	26590	8590	11273	18240	9507	12064	14350	7182	19076	16758	5308	21706.5	14756.5	13207	17917	0.679819	0.608435	0.825421	E		NWMN_2315	phosphoglycerate mutase	0.713615	1.23232	0.840233	SA2204	gpmA	gpmA	phosphoglycerate mutase
NWMN_1411	AtsA/ElaC	1971	2528	689	1885	1872	516.8	1999	1327	704.3	2421	1712	466.9	2249.5	1878.5	1663	2066.5	0.835074	0.739275	0.918649	R		NWMN_1890	hypothetical protein	0.86739	0.719251	0.840523	SA1768	-	NWMN_1890	hypothetical protein
NWMN_1412	glucose-6-phosphate 1-dehydrogenase	9010	13826	6508	6145	9617	6323	8048	8680	5502	12460	9544	4622	11418	7881	8364	11002	0.690226	0.732528	0.963566	G		NWMN_2438	pyruvate oxidase	1.00008	0.997058	0.841325	SA2327	cidC	poxB	pyruvate oxidase
NWMN_1413	transcriptional regulator AraC	5835	8431	4155	4921	7622	4152	6693	6026	4018	7839	6153	2826	7133	6271.5	6359.5	6996	0.879223	0.89156	0.980793	K		NWMN_0396	superantigen-like protein	0.774767	0.593559	0.84133	SA0389	ssl9	set9nm	superantigen-like protein
NWMN_1414	alpha-D-1,4-glucosidase	3102	2893	1679	1829	2501	1486	2497	1883	1619	2814	2437	1658	2997.5	2165	2190	2625.5	0.722269	0.730609	0.875897	G		NWMN_0607	teichoic acids export protein ATP-binding subunit	0.811824	0.62511	0.841332	SA0593	tagH	tagH	teichoic acids export protein ATP-binding subunit
NWMN_1415	maltose operon transcriptional repressor	3260	3882	1188	2685	3288	1230	2132	2321	1091	3279	2886	922.4	3571	2986.5	2226.5	3082.5	0.83632	0.623495	0.863204	K		NWMN_0216	hypothetical protein	0.806512	0.691296	0.841369		-	NWMN_0216	hypothetical protein
NWMN_1416	glyoxalase	2938	5480	2223	3469	3602	1926	2689	2921	2092	3219	4185	1578	4209	3535.5	2805	3702	0.839986	0.666429	0.879544	E		NWMN_0730	acetyltransferase	0.773929	0.707381	0.841424	SA0717	maa	NWMN_0730	acetyltransferase
NWMN_1417	6-phosphogluconate dehydrogenase	12610	21224.4	8283.14	11534	17998.7	10792.7	11605.1	12713	7973.14	13609.7	13773	6856	16917.2	14766.4	12159.1	13691.4	0.87286	0.71874	0.809315	G		NWMN_0745	enolase	0.80767	0.942387	0.841469	SA0731	eno	eno	enolase
NWMN_1418	peptidase T	7346	13503	5822	5550	9274	6188	5795	6641	5089	6857	7402	4163	10424.5	7412	6218	7129.5	0.711017	0.596479	0.683918	E		NWMN_1086	hypothetical protein	0.703575	0.673826	0.841693	SA1019	-	NWMN_1086	hypothetical protein
NWMN_1419	hypothetical protein	2358	3391	1579	2315	3142	1586	2395	2067	1413	2731	2148	994.5	2874.5	2728.5	2231	2439.5	0.949209	0.776135	0.848669	S		NWMN_1152	hypothetical protein	0.716073	0.607612	0.841709	SA1085	yfhO	NWMN_1152	hypothetical protein
NWMN_1420	hypothetical protein	1075	1264	523	1116	1386	680.5	1096	912.4	482.4	1153	882.6	372	1169.5	1251	1004.2	1017.8	1.06969	0.858658	0.870286			NWMN_1954	ABC transporter ATP-binding protein	0.749937	0.637724	0.841942	SA1852	vga	NWMN_1954	ABC transporter ATP-binding protein
NWMN_1421	2-oxoisovalerate dehydrogenase E2 component dihydrolipoamide acetyltransferase	2846	3540	2365	1906	2437	2196	3489	2532	2550	3893	3429	2597	3193	2171.5	3010.5	3661	0.680081	0.942844	1.14657	C		NWMN_2410	multidrug resistance transporter protein	0.7004	0.746931	0.842135		yvmA	NWMN_2410	multidrug resistance transporter protein
NWMN_1422	2-oxoisovalerate dehydrogenase E1 component beta subunit	3736	4360	3028	2243	3372	2812	3973	3011	2830	4294	4249	3649	4048	2807.5	3492	4271.5	0.693552	0.862648	1.05521	C		NWMN_2284	proton/sodium-glutamate symporter	0.701284	0.894969	0.842332	SA2172	gltT	NWMN_2284	proton/sodium-glutamate symporter
NWMN_1423	2-oxoisovalerate dehydrogenase E1 component alpha subunit	6765	5474	1720	2775	4345	3624	5465	2757	2997	4511	5127	4033	6119.5	3560	4111	4819	0.581747	0.671787	0.787483	C		NWMN_1482	DnaJ protein	0.828236	0.646895	0.842653	SA1408	dnaJ	dnaJ	DnaJ protein
NWMN_1424	dihydrolipoamide dehydrogenase	8653	7998	4579	3457	6298	4437	7548	5520	4006	7129	8081	4760	8325.5	4877.5	6534	7605	0.585851	0.784818	0.913459	C		NWMN_1946	accessory gene regulator protein A	0.603274	1.26094	0.842724	SA1844	agrA	agrA	accessory gene regulator protein A
NWMN_1425	DNA repair protein RecN	6267	6553	1278	3269	4581	2483	4744	2623	3600	1407	4198	2716	6410	3925	3683.5	2802.5	0.612324	0.574649	0.437207	L		NWMN_0425	trans-sulfuration enzyme	0.939582	0.881487	0.843016	SA0419	yrhB	metB	trans-sulfuration enzyme
NWMN_1426	arginine repressor	5248	7129	3431	3641	5077	1522	3832	3522	3195	3463	5085	1871	6188.5	4359	3677	4274	0.704371	0.594167	0.690636	K		NWMN_0667	fructose operon transcriptional repressor	0.899873	0.592638	0.843182	SA0653	deoR	NWMN_0667	fructose operon transcriptional repressor
NWMN_1427	geranyltranstransferase	6861	8637	2815	4355	6549	1963	5397	4695	3023	9076	7221	2574	7749	5452	5046	8148.5	0.703575	0.651181	1.05156	H		NWMN_2461	squalene synthase	0.733924	0.839265	0.843572	SA2348	crtN	crtN	squalene synthase
NWMN_1428	exodeoxyribonuclease VII large subunit	6002	6123	2526	3305	5480	2574	3702	3779	2105	5889	4615	1893	6062.5	4392.5	3740.5	5252	0.724536	0.61699	0.866309	L		NWMN_1199	2-oxoglutarate ferredoxin oxidoreductase subunit beta	0.825539	0.631558	0.843703	SA1132	porB	porB	2-oxoglutarate ferredoxin oxidoreductase subunit beta
NWMN_1429	transcription antitermination protein NusB	6889	8995	3094	5986	7488	3456	5428	4989	3242	8247	6826	2996	7942	6737	5208.5	7536.5	0.848275	0.655817	0.948942	K		NWMN_1204	DNA mismatch repair protein	0.993024	0.627806	0.843881	SA1137	mutS	mutS	DNA mismatch repair protein
NWMN_1430	hypothetical protein	4800	5860	2295	4072	4943	2410	3727	3859	2376	6351	4353	1987	5330	4507.5	3793	5352	0.845685	0.711632	1.00413	S		NWMN_0799	hypothetical protein	0.751708	0.740539	0.843978	SA0789	-	NWMN_0799	hypothetical protein
NWMN_1431	acetyl-CoA carboxylase biotin carboxylase subunit	5381	5683	1783	5432	7169	2843	3748	3887	1367	5769	4551	1466	5532	6300.5	3817.5	5160	1.13892	0.690076	0.932755	I		NWMN_0813	NhaC family sodium:proton (Na+:H+) antiporter	0.827846	0.615798	0.845337	SA0804	yuiF	NWMN_0813	NhaC family sodium:proton (Na+:H+) antiporter
NWMN_1432	acetyl-CoA carboxylase biotin carboxyl carrier protein	10503	10197	2637	9949	10722	4525	7148	6360	2690	9266	7959	2745	10350	10335.5	6754	8612.5	0.998599	0.65256	0.832126	I		NWMN_1085	HAD superfamily hydrolase	0.721854	0.703065	0.845655	SA1018	yjjG	NWMN_1085	HAD superfamily hydrolase
NWMN_1433	elongation factor P	2706.14	3344.86	1863.57	1951.14	2927.71	2862	3616.14	1527.31	2064.14	4069.67	2699.43	2383	3025.5	2439.43	2571.73	3384.55	0.806289	0.850018	1.11867	J		NWMN_0208	drug transporter	0.893231	0.589231	0.845846	SA0263	-	NWMN_0208	drug transporter
NWMN_1434	proline dipeptidase	8480	13282	3573	7193	9879	3038	8463	8040	3630	12508	11487	3071	10881	8536	8251.5	11997.5	0.784487	0.75834	1.10261	E		NWMN_2154	hypothetical protein	0.801781	0.769644	0.846114	SA2049	-	NWMN_2154	hypothetical protein
NWMN_1435	hypothetical protein	3544.71	6089.57	1824.86	2831.57	4247.43	1894.14	3204.57	3204.57	2109.43	4433.43	3600.71	1229.43	4817.14	3539.5	3204.57	4017.07	0.734772	0.665243	0.833912			NWMN_2437	PTS system glucose-specific IIABC component	0.961848	0.611472	0.846743	SA2326	ptsG	ptsG	PTS system glucose-specific IIABC component
NWMN_1437	biotin/lipoate A/B protein ligase	3149	4615	1748	2742	3280	1756	2992	2253	1584	3388	2973	1261	3882	3011	2622.5	3180.5	0.775631	0.675554	0.819294	H		NWMN_1137	ATP-dependent DNA helicase RecG	0.936408	0.681818	0.846832	SA1070	recG	recG	ATP-dependent DNA helicase RecG
NWMN_1438	rhodanese-like domain-containing protein	3372	5629	2055	2956	4827	3137	4078	3302	2806	4134	4345	2110	4500.5	3891.5	3690	4239.5	0.864682	0.819909	0.942006	P		NWMN_0839	fumarylacetoacetate hydrolase	0.887409	0.88174	0.846872	SA0829	mhpD	NWMN_0839	fumarylacetoacetate hydrolase
NWMN_1439	glycine dehydrogenase subunit 2	2499	2570	1439	1689	1991	1322	2619	1930	1471	2189	2531	1324	2534.5	1840	2274.5	2360	0.725981	0.897416	0.93115	E		NWMN_0185	2-C-methyl-D-erythritol 4-phosphate cytidylyltransferase	0.864131	0.614199	0.84704	SA0241	ispD	NWMN_0185	2-C-methyl-D-erythritol 4-phosphate cytidylyltransferase
NWMN_1440	glycine dehydrogenase subunit 1	2426	2581	1398	1670	2005	1258	3309	1806	1278	2103	2327	1242	2503.5	1837.5	2557.5	2215	0.733972	1.02157	0.884761	E		NWMN_0389	superantigen-like protein	0.883506	1.071	0.847357	SA0383	ssl2	set2nm	superantigen-like protein
NWMN_1441	glycine cleavage system aminomethyltransferase T	2464	3079	1144	2035	2204	1300	3151	1749	1175	2633	2390	950.2	2771.5	2119.5	2450	2511.5	0.764748	0.883998	0.906188	E		NWMN_0571	hypothetical protein	0.769535	0.683729	0.847428		-	NWMN_0571	hypothetical protein
NWMN_1442	shikimate kinase	5137	5830	2125	4802	5164	2785	4316	392.9	2068	3836	4555	1455	5483.5	4983	2354.45	4195.5	0.908726	0.42937	0.765114	E		NWMN_1369	glycosyl transferase group 1	0.780915	0.651895	0.847489	SA1291	bshA	NWMN_1369	glycosyl transferase group 1
NWMN_1443	hypothetical protein	544	454.1	257.6	340.1	414.8	288.1	357.4	287.1	205.7	656.7	390.2	229.9	499.05	377.45	322.25	523.45	0.756337	0.645727	1.04889	R		NWMN_1257	exonuclease SbcD	0.799763	0.560451	0.847626	SA1180	sbcD	sbcD	exonuclease SbcD
NWMN_1444	hypothetical protein	354.2	353.4	128.2	281.7	275.2	135.7	349.9	183.4	140.9	294.8	246.7	104.6	353.8	278.45	266.65	270.75	0.787027	0.753674	0.765263			NWMN_0027	hypothetical protein	0.804985	0.858941	0.847636	SA0082	-	NWMN_0027	hypothetical protein
NWMN_1445	late competance protein comGD	252	217.5	92.18	175.8	175.6	75.23	160.8	132.3	88.88	345.4	189.4	88.43	234.75	175.7	146.55	267.4	0.748456	0.624281	1.13908	N		NWMN_1675	CrcB-like protein	0.834402	1.0975	0.847667	SA1602	crcB_1	NWMN_1675	CrcB-like protein
NWMN_1446	competence protein ComGC-like protein	244.2	209.8	121.5	145.9	189.8	105.1	178.3	152.8	102.8	222.6	174.7	106.7	227	167.85	165.55	198.65	0.739427	0.729295	0.87511	U		NWMN_1081	hypothetical protein	0.617098	0.518875	0.847853		-	NWMN_1081	hypothetical protein
NWMN_1447	competence protein ComGB-like protein	95.082	113.25	36.394	78.2302	88.062	43.826	59.77	68.692	34.4476	103.998	104.364	31.592	104.166	83.1461	64.231	104.181	0.798208	0.616622	1.00014	N		NWMN_2386	helicase	0.824968	0.72271	0.848251	SA2276	-	NWMN_2386	helicase
NWMN_1448	competence protein ComGA-like protein	157.3	173.3	74.4	123.4	118	79.3	160.5	112.3	87.49	150.1	123.5	89.45	165.3	120.7	136.4	136.8	0.730188	0.825166	0.827586	N		NWMN_1513	peptidase U32	0.700749	0.797628	0.848315	SA1440	-	NWMN_1513	peptidase U32
NWMN_1449	metallo-beta-lactamase super	4422	3762	2691	2269	3511	3472	6323	2469	1816	4128	3000	2422	4092	2890	4396	3564	0.706256	1.07429	0.870968	R		NWMN_2291	transcriptional regulator DegU	0.671978	0.774872	0.848417	SA2179	nreC	NWMN_2291	transcriptional regulator DegU
NWMN_1450	hypothetical protein	4966	4300	1228	2411	3555	3458	5621	77.11	2545	1768	2715	2138	4633	2983	2849.05	2241.5	0.643859	0.614948	0.483812	S		NWMN_1419	hypothetical protein	0.949209	0.776135	0.848669	SA1344	-	NWMN_1419	hypothetical protein
NWMN_1451	glucokinase	22476	14861	10215	9677	10864	11550	19948	8696	8127	17542	12701	10115	18668.5	10270.5	14322	15121.5	0.550151	0.767175	0.810001	K		NWMN_2243	hypothetical protein	1.06449	0.680513	0.848985	SA2133	-	NWMN_2243	hypothetical protein
NWMN_1452	rhomboid	9268	8850.5	4964.5	5903.5	6217	4104	6643.5	5135	5541	9846.5	7244.5	4586.5	9059.25	6060.25	5889.25	8545.5	0.668957	0.650081	0.94329	R		NWMN_0066	2-dehydro-3-deoxyglucarate aldolase	0.74944	0.755309	0.849109	SA0118	sbnG	sbnG	2-dehydro-3-deoxyglucarate aldolase
NWMN_1453	5-formyltetrahydrofolate cyclo-ligase	6870.68	7386.44	5112.94	4677.49	5081.22	4582.91	4921.2	2870.8	5335.62	8086.13	5634.93	4516.41	7128.56	4879.36	3896	6860.53	0.68448	0.546534	0.962401	H		NWMN_1596	NADP-dependent malic enzyme	0.943913	0.74595	0.849165	SA1524	maeB	maeB	NADP-dependent malic enzyme
NWMN_1454	50S ribosomal protein L33	1669	2013	902.6	1510	1981	937.9	2127	1565	1117	1457	2449	911.4	1841	1745.5	1846	1953	0.948126	1.00272	1.06084	J		NWMN_0558	hypothetical protein	0.750425	0.591161	0.849292	SA0552	-	NWMN_0558	hypothetical protein
NWMN_1455	penicillin-binding protein 3	8058	9748	3136	6877	8653	3696	5234	6447	3924	8161	7806	2812	8903	7765	5840.5	7983.5	0.872178	0.656015	0.89672	M		NWMN_1403	hypothetical protein	0.862321	0.651455	0.849406	SA1326	scpA	NWMN_1403	hypothetical protein
NWMN_1456	superoxide dismutase Mn	16565	17790	17688	16431	12095	11830	27498	18075	17082	21819	19924	18681	17177.5	14263	22786.5	20871.5	0.83033	1.32653	1.21505	P		NWMN_0731	TPR domain-containing protein	0.74513	0.626311	0.849416	SA0718	-	NWMN_0731	TPR domain-containing protein
NWMN_1457	zinc-specific metalloregulatory protein	256.3	402.9	102.2	186.3	331.7	186.8	197	303.1	98.88	222.4	218.3	94.37	329.6	259	250.05	220.35	0.785801	0.758647	0.668538	P		NWMN_0926	fmt protein	0.751384	0.823359	0.84946	SA0909	fmtA	NWMN_0926	fmt protein
NWMN_1458	ABC transporter permease	430.1	382	221.3	398.2	370.8	209.1	379.8	272	156.4	571.8	299.3	162.5	406.05	384.5	325.9	435.55	0.946928	0.802611	1.07265	P		NWMN_2219	hypothetical protein	0.763394	0.717899	0.849464	SA2110	-	NWMN_2219	hypothetical protein
NWMN_1459	ABC transporter	629.1	516.9	210.3	595.3	488.9	199.9	483	339.2	218.2	730.5	482	246.6	573	542.1	411.1	606.25	0.946073	0.717452	1.05803	P		NWMN_1991	hypothetical protein	0.950469	0.801606	0.849531	SA1890	csoR	NWMN_1991	hypothetical protein
NWMN_1460	endonuclease IV	3594	3504	2049	2817	4144	2673	2661	3377	1934	3690	3807	1647	3549	3480.5	3019	3748.5	0.980699	0.850662	1.05621	L		NWMN_1850	NAD synthetase	0.671066	0.675631	0.849551	SA1728	nadE	nadE	NAD synthetase
NWMN_1461	ATP-dependent RNA helicase DEAD/DEAH box	6754	5820	1678	4561	6424	3313	3393	0.01	1616	2865	3894	1851	6287	5492.5	1696.51	3379.5	0.873628	0.269843	0.537538	L		NWMN_0620	DAK2 domain-containing protein	1.07628	0.655326	0.849869	SA0606	dhaL	NWMN_0620	DAK2 domain-containing protein
NWMN_1462	hypothetical protein	5154	5189	3013	4110	5010	3805	4822	3492	2554	4673	3965	2636	5171.5	4560	4157	4319	0.881756	0.803829	0.835154	S		NWMN_0413	hypothetical protein	0.764969	0.72634	0.850012	SA0406	-	NWMN_0413	hypothetical protein
NWMN_1463	hypothetical protein	3957.71	3143.14	1773.03	2445.64	2942.83	2036.57	3508.57	2023.37	1210.23	2942.57	2356.29	1321.07	3550.43	2694.24	2765.97	2649.43	0.758848	0.779053	0.746228	R		NWMN_1197	hypothetical protein	0.951817	0.667429	0.850336	SA1130	-	NWMN_1197	hypothetical protein
NWMN_1464	RNA polymerase sigma factor RpoD	9521	6063	5200	4301	4829	4392	11311	4979	5078	6033	5480	4336	7792	4565	8145	5756.5	0.585857	1.0453	0.738771	K		NWMN_1236	thermonuclease	0.967789	0.783197	0.850513	SA1160	nucI	nuc	thermonuclease
NWMN_1465	DNA primase	12024.5	14607	7061.5	7259	10408	6872	9298	8864.5	6563	12829.5	11779	5814.5	13315.8	8833.5	9081.25	12304.2	0.663387	0.681993	0.924037	L		NWMN_1743	fumarate hydratase	0.84984	0.853335	0.850714	SA1669	fumC	fumC	fumarate hydratase
NWMN_1466	hypothetical protein	6100	7477	1447	5202	5705	2685	4622	3048	2744	871.8	3093	2451	6788.5	5453.5	3835	1982.4	0.803344	0.564926	0.292023	S		NWMN_1065	hypothetical protein	0.821664	0.753865	0.850785	SA0999	-	NWMN_1065	hypothetical protein
NWMN_1467	CBS domain-containing protein	3802	4703	1938	3613	4266	2562	2558	2838	1810	3760	2845	1335	4252.5	3939.5	2698	3302.5	0.926396	0.63445	0.776602	R		NWMN_0712	peptidase T	0.803593	0.656228	0.850807	SA0698	pepT	pepT	peptidase T
NWMN_1468	glycyl-tRNA synthetase	13384	14602	8410	13438	14166	8860	7195	13251	9089	18036	17705	8526	13993	13802	10223	17870.5	0.98635	0.73058	1.2771	J		NWMN_1225	hypothetical protein	0.591293	0.826495	0.850924		-	NWMN_1225	hypothetical protein
NWMN_1469	DNA repair protein RecO	2260.71	2724	1695.86	1356	2027.86	1715.86	3263.29	1206.17	1390.57	1792.14	1759.57	1304.57	2492.36	1691.93	2234.73	1775.86	0.678847	0.896633	0.712521	L		NWMN_1600	universal stress protein	0.911686	0.982853	0.851215	SA1528	uspA_2	NWMN_1600	universal stress protein
NWMN_1470	GTP-binding protein Era	9625	10462	6388.5	6280.5	8378	7157.5	10142	5906.5	4604	8899	6491.5	5178.5	10043.5	7329.25	8024.25	7695.25	0.729751	0.79895	0.766192	R		NWMN_0653	ABC transporter ATP-binding MsbA	0.701972	0.721142	0.851331	SA0639	graA	NWMN_0653	ABC transporter ATP-binding MsbA
NWMN_1471	cytidine deaminase	9601	9488	6245	5769	6945	7292	8225	4485	5125	8159	5551	5189	9544.5	6357	6355	6855	0.666038	0.665828	0.718215	F		NWMN_2077	iron compound ABC transporter permease protein	0.692385	0.557939	0.851386	SA1978	htsB	NWMN_2077	iron compound ABC transporter permease protein
NWMN_1472	diacylglycerol kinase	12798	11250	8078	8246	10561	10247	9186	6663	6082	10797	7532	6312	12024	9403.5	7924.5	9164.5	0.782061	0.659057	0.762184	M		NWMN_2347	amino acid ABC transporter ATP-binding protein	0.668913	0.665612	0.851719	SA2237	opuCA	opuCA	amino acid ABC transporter ATP-binding protein
NWMN_1473	hypothetical protein	9436	8084	1935	4955	6850	6224	7678	683.2	4186	737.8	1429	4030	8760	5902.5	4180.6	1083.4	0.673801	0.477237	0.123676	R		NWMN_2250	hypothetical protein	0.851615	0.678878	0.852112	SA2139	-	NWMN_2250	hypothetical protein
NWMN_1474	phosphate starvation-induced protein PhoH-like protein	15464	14965	8018	10261	12634	12268	13161	8281	8161	12850	8537	7509	15214.5	11447.5	10721	10693.5	0.752407	0.704657	0.702849	T		NWMN_1978	hypothetical protein	0.90238	0.64405	0.852392	SA1877	ydbT	NWMN_1978	hypothetical protein
NWMN_1475	hypothetical protein	3614	5162	4272	2715	4845	3305	6446	6579	4295	5002	6271	4227	4388	3780	6512.5	5636.5	0.86144	1.48416	1.28453			NWMN_1846	adenylosuccinate lyase	0.828888	0.752996	0.852725	SA1724	purB	purB	adenylosuccinate lyase
NWMN_1476	hypothetical protein	35882	45633	27048	25692	36138	26175	32815	36126	27368	34914	47470	30393	40757.5	30915	34470.5	41192	0.758511	0.845746	1.01066	S		NWMN_0511	M20/M25/M40 family peptidase	0.968214	0.687185	0.852926	SA0507	-	NWMN_0511	M20/M25/M40 family peptidase
NWMN_1477	hypothetical protein	38360.3	49691.4	27663.4	25117.4	38121.7	31313.7	32542	38544.4	29216.4	35196.7	48928.7	32069.7	44025.9	31619.6	35543.2	42062.7	0.718205	0.807326	0.955409	O		NWMN_1210	hydrolase alpha/beta fold domain-containing protein	0.747804	0.368328	0.85302	SA1143	-	NWMN_1210	hydrolase alpha/beta fold domain-containing protein
NWMN_1478	30S ribosomal protein S21	5598	6962	4588	6352	6489	3927	9646	6452	6652	7933	9241	5296	6280	6420.5	8049	8587	1.02237	1.28169	1.36736	J		NWMN_1747	SpoU rRNA methylase	0.942527	0.77476	0.853541	SA1672	-	NWMN_1747	SpoU rRNA methylase
NWMN_1479	hypothetical protein	5226	5865	2109	5604	7430	3062	3072	4880	1916	5377	5539	1773	5545.5	6517	3976	5458	1.17519	0.716978	0.984221	J		NWMN_0633	phosphate transporter	1.04252	0.826537	0.854125	SA0619	pitA	NWMN_0633	phosphate transporter
NWMN_1480	hypothetical protein	7432	7677	2259	6761	8352	3320	4071	4815	1748	5747	5236	1542	7554.5	7556.5	4443	5491.5	1.00026	0.588126	0.726918	S		NWMN_0299	hypothetical protein	1.84665	0.94402	0.854437		-	NWMN_0299	hypothetical protein
NWMN_1481	ribosomal protein L11 methyltransferase	1428	1681	909.7	1030	1563	1044	1069	1161	845.2	1380	1658	1005	1554.5	1296.5	1115	1519	0.83403	0.717272	0.977163	J		NWMN_0503	hypothetical protein	0.841005	0.650117	0.854556	SA0499	-	NWMN_0503	hypothetical protein
NWMN_1482	DnaJ protein	4437	5274	2312	3056	4987	2730	2915	3367	2093	3713	4470	2231	4855.5	4021.5	3141	4091.5	0.828236	0.646895	0.842653	O		NWMN_0455	hypothetical protein	1.06342	0.698427	0.854561	SA0450	rnmV	NWMN_0455	hypothetical protein
NWMN_1483	DnaK protein	9477.71	13182.1	6860.43	5650.43	9710.43	6208.29	8433	8009.43	6671.86	9296.57	10657.1	7224.86	11329.9	7680.43	8221.21	9976.86	0.677889	0.725619	0.880575	O		NWMN_0487	ATP-dependent Clp protease ATP-binding subunit ClpC	0.780818	0.87779	0.854676	SA0483	clpC	clpC	ATP-dependent Clp protease ATP-binding subunit ClpC
NWMN_1484	Hsp-70 cofactor GrpE protein	7694	10920.5	4278.5	4711.5	7780	3902.5	6024	5721	3910	7205.5	6835	3625.5	9307.25	6245.75	5872.5	7020.25	0.671063	0.63096	0.754278	O		NWMN_0177	PTS system glucose-specific IIBC component	1.02968	0.750589	0.85486	SA0233	ptsG	NWMN_0177	PTS system glucose-specific IIBC component
NWMN_1485	heat-inducible transcription repressor HrcA	9145	11774	6175	3952	7934	5850	7416	7004	6158	8394	8101	4999	10459.5	5943	7210	8247.5	0.568192	0.689325	0.788518	K		NWMN_1949	sucrose operon repressor	0.717025	0.585355	0.854932	SA1847	scrR	scrR	sucrose operon repressor
NWMN_1486	coproporphyrinogen III oxidase	299.6	312.5	134.1	199	259.7	114.4	265.1	212.3	153.2	356.4	310.8	129	306.05	229.35	238.7	333.6	0.749387	0.779938	1.09002	H		NWMN_0195	two-component response regulator	0.547428	0.581518	0.854973	SA0251	lytR	lytR	two-component response regulator
NWMN_1487	GTP-binding protein LepA	2479	2223	985.6	1758	1745	824.6	2325	1606	950.9	2871	2410	960.9	2351	1751.5	1965.5	2640.5	0.745002	0.836027	1.12314	M		NWMN_0367	phosphoglycerate mutase	0.838679	0.634902	0.855196	SA0361	-	NWMN_0367	phosphoglycerate mutase
NWMN_1488	30S ribosomal protein S20	3439	3831	1663	2349	3830	2941	3721	2581	2244	4385	3653	2264	3635	3089.5	3151	4019	0.849931	0.86685	1.10564	J		NWMN_2055	ABC transporter ATP-binding protein	1.01331	0.59349	0.855253	SA1958	-	NWMN_2055	ABC transporter ATP-binding protein
NWMN_1489	DNA polymerase III subunit delta	574.7	764.9	172.8	323	544.3	248.7	483.3	307	203.7	585.8	396.6	179.3	669.8	433.65	395.15	491.2	0.647432	0.589952	0.733353	L		NWMN_1378	nucleoside diphosphate kinase	0.945538	0.873302	0.855371	SA1301	ndk	ndk	nucleoside diphosphate kinase
NWMN_1490	DNA internalization-related competence protein ComEC/Rec2	104	154.1	64.89	56.4	80.11	87.46	80.6	96.52	57.11	85.36	129.6	76.79	129.05	68.255	88.56	107.48	0.528904	0.686246	0.832855	R		NWMN_1105	glyoxalase	0.817974	0.723333	0.855556	SA1037	gloA2	NWMN_1105	glyoxalase
NWMN_1491	competence protein ComEB required for DNA binding and uptake	927.1	1173	574	635.1	952.7	669.9	877.4	706.8	526.8	873.4	803.2	418.8	1050.05	793.9	792.1	838.3	0.756059	0.754345	0.798343	F		NWMN_2478	oxidoreductase	0.825709	0.829386	0.856113	SA2365	-	NWMN_2478	oxidoreductase
NWMN_1492	competence protein ComEA	516.4	474.1	194.3	346.7	308.7	226.6	477	293.2	193.9	501.3	399.1	187.6	495.25	327.7	385.1	450.2	0.661686	0.777587	0.909036	L		NWMN_1833	ImpB/MucB/SamB	0.875962	0.60314	0.856417	SA1711	dinP	dinP	ImpB/MucB/SamB
NWMN_1493	hypothetical protein	2523	1871	1190	1628	1581	1306	2209	535.9	1019	1351	1422	963.8	2197	1604.5	1372.45	1386.5	0.730314	0.624693	0.631088	Q		NWMN_0874	hypothetical protein	0.878815	0.712922	0.856461	SA0862	cyaA	NWMN_0874	hypothetical protein
NWMN_1494	hypothetical protein	2655	2015	1324	1773	1695	1515	2520	1532	1149	2317	1508	1035	2335	1734	2026	1912.5	0.742612	0.867666	0.819058	S		NWMN_0619	dihydroxyacetone kinase	1.11806	0.626543	0.857194	SA0605	dhaK	NWMN_0619	dihydroxyacetone kinase
NWMN_1495	hypothetical protein	5059	3207	1314	3219	3303	2959	4396	1697	2098	3467	2969	2376	4133	3261	3046.5	3218	0.789015	0.737116	0.778611	H		NWMN_0033	hypothetical protein	0.476186	0.56919	0.857216		-	NWMN_0033	hypothetical protein
NWMN_1496	nicotinate (nicotinamide) nucleotide adenylyltransferase	3688.57	3374.71	1535.57	3228.43	3538	2045.86	2808.43	2346.86	1610.86	4007.14	3138.71	1577.57	3531.64	3383.21	2577.64	3572.93	0.957972	0.729871	1.01169	H		NWMN_0193	cell wall biosynthesis protein ScdA	0.924292	0.955291	0.857228	SA0249	scdA	scdA	cell wall biosynthesis protein ScdA
NWMN_1497	hypothetical protein	3416	3225	1303	2438	3517	1938	2058	2192	1481	3381	2476	1354	3320.5	2977.5	2125	2928.5	0.896702	0.639964	0.881945	J		NWMN_1680	S-adenosylmethionine synthetase	0.779768	0.8003	0.85725	SA1608	metK	metK	S-adenosylmethionine synthetase
NWMN_1498	shikimate 5-dehydrogenase	4149	4043.14	1684	3786.43	4513.57	2259.86	2719	2845	1774.14	4509.29	3452.29	1640.43	4096.07	4150	2782	3980.79	1.01317	0.679187	0.971855	E		NWMN_0190	alcohol dehydrogenase zinc-containing	0.853681	0.577479	0.857461	SA0246	tarJ	NWMN_0190	alcohol dehydrogenase zinc-containing
NWMN_1499	GTP-binding protein YqeH	3042	2831	1179	3177	3630	1712	2029	2047	1108	3419	2668	1210	2936.5	3403.5	2038	3043.5	1.15903	0.694023	1.03644	R		NWMN_2145	50S ribosomal protein L16	1.12593	0.663725	0.857505	SA2040	rplP	rplP	50S ribosomal protein L16
NWMN_1500	HAD superfamily hydrolase	5051.14	4316.29	1953.57	5021.71	5312	2749.57	3346	3048.14	1622.71	5103.29	3792.86	1724.43	4683.71	5166.86	3197.07	4448.07	1.10315	0.682593	0.949689	R		NWMN_1602	proline dipeptidase-like protein	0.844533	0.703352	0.857874	SA1530	pepQ	NWMN_1602	proline dipeptidase-like protein
NWMN_1501	MTA/SAH nucleosidase	3215	2846	1084	3175	3495	1845	1935	2071	973.2	4167	2291	1058	3030.5	3335	2003	3229	1.10048	0.660947	1.0655	F		NWMN_0973	inositol monophosphatase	0.849259	0.609276	0.857963	SA0958	suhB2	NWMN_0973	inositol monophosphatase
NWMN_1502	hypothetical protein	193.4	181.8	42.3	165.1	163.5	115.1	124.2	254.8	93.49	162.1	141	66.6	187.6	164.3	189.5	151.55	0.8758	1.01013	0.807836			NWMN_1217	glutamine synthetase	0.660366	0.921848	0.85819	SA1150	glnA	glnA	glutamine synthetase
NWMN_1503	enterotoxin	229.85	326	109.98	190.35	217.85	161.31	155.65	174.45	113.545	242.8	206	99.645	277.925	204.1	165.05	224.4	0.734371	0.593865	0.807412			NWMN_0329	glycerol-3-phosphate transporter	0.952749	0.789414	0.858246	SA0325	glpT	NWMN_0329	glycerol-3-phosphate transporter
NWMN_1504	hypothetical protein	857.457	835.457	276.729	775.314	532.286	247.529	831.114	501.643	301.243	1060.49	695.086	194.271	846.457	653.8	666.379	877.786	0.772396	0.787256	1.03701	S		NWMN_0612	penicillin-binding protein 4	0.891369	0.654172	0.858251	SA0598	pbp4	pbp4	penicillin-binding protein 4
NWMN_1505	hypothetical protein	1365	1366	886.9	333.9	470.3	380	1779	992.2	1162	2177	1797	1226	1365.5	402.1	1385.6	1987	0.294471	1.01472	1.45514	P		NWMN_2240	hypothetical protein	1.01303	0.683044	0.858942	SA2130	ynfA	NWMN_2240	hypothetical protein
NWMN_1506	hypothetical protein	6778	6094	2823	1358	1994	1627	4280	4024	3815	7301	6789	4223	6436	1676	4152	7045	0.26041	0.645121	1.09462	R		NWMN_0671	hemolysin	0.833915	0.815668	0.859379	SA0657	-	NWMN_0671	hemolysin
NWMN_1507	acetyl-CoA carboxylase biotin carboxylase	6019	5935	2733	1421	1907	1297	3750	4399	3399	7314	7255	3983	5977	1664	4074.5	7284.5	0.278401	0.681697	1.21876	I		NWMN_1567	GTPase EngB	0.896035	0.587443	0.859685	SA1497	engB	engB	GTPase EngB
NWMN_1508	acetyl-CoA carboxylase biotin carboxyl carrier protein	5262	7124	2380	1760	2126	1151	4215	1324	2943	1368	7884	3342	6193	1943	2769.5	4626	0.313741	0.447198	0.746972	I		NWMN_1376	3-dehydroquinate synthase	0.901223	0.588636	0.8601	SA1298	aroB	aroB	3-dehydroquinate synthase
NWMN_1509	hypothetical protein	3869	5202	1757	1333	1704	945.7	3243	3823	2416	7035	5612	2432	4535.5	1518.5	3533	6323.5	0.334803	0.778966	1.39422	E		NWMN_0131	isochorismatase	0.727035	0.72329	0.860192	SA0181	entB	entB	isochorismatase
NWMN_1510	hypothetical protein	3597.43	4148	1031.7	1394.86	1217	540.286	3518.86	3012	1568.14	5910.57	5489.14	1786.43	3872.71	1305.93	3265.43	5699.86	0.337213	0.843189	1.4718	E		NWMN_2362	nickel ABC transporter permease protein	0.461811	0.646471	0.861102	SA2253	opp-1C	opp1C	nickel ABC transporter permease protein
NWMN_1511	transcription elongation factor	341.3	681.1	233.5	266.2	564	249.6	287.2	303.5	219	267.4	340.5	159.3	511.2	415.1	295.35	303.95	0.812011	0.577758	0.594581	K		NWMN_2131	adenylate kinase	1.04738	0.654328	0.861118	SA2027	adk	adk	adenylate kinase
NWMN_1512	uridine kinase	4237	5824	1976	3796	4768	1874	3986	3371	2232	4023	5286	1997	5030.5	4282	3678.5	4654.5	0.851208	0.731239	0.925256	F		NWMN_0320	lipoate-protein ligase A	0.73426	0.600035	0.861162	SA0316	lplA1	NWMN_0320	lipoate-protein ligase A
NWMN_1513	peptidase U32	4694	3316	2357	2361	3252	2847	3679	2710	1808	3374	3421	2434	4005	2806.5	3194.5	3397.5	0.700749	0.797628	0.848315	O		NWMN_0121	formate dehydrogenase	0.748433	0.405963	0.861164	SA0171	fdh	NWMN_0121	formate dehydrogenase
NWMN_1514	peptidase U32	4269	2744	542.3	1932	1990	1833	2872	1274	1254	580	1999	1319	3506.5	1961	2073	1289.5	0.559247	0.591188	0.367746	O		NWMN_2051	lytic regulatory protein	1.04445	0.956586	0.861212	SA1956	truncated-SA	NWMN_2051	lytic regulatory protein
NWMN_1515	O-methyltransferase	2498	2048	410.9	1485	1390	403.6	1437	1010	492.6	1936	1274	346.3	2273	1437.5	1223.5	1605	0.632424	0.538275	0.706115	R		NWMN_2433	hypothetical protein	1.00805	0.680997	0.861602	SA2322	-	NWMN_2433	hypothetical protein
NWMN_1516	hypothetical protein	764.7	865.6	539.7	706	939.2	984	820.5	646.2	626.6	885.9	773	584.8	815.15	822.6	733.35	829.45	1.00914	0.89965	1.01754	S		NWMN_0894	5' nucleotidase	0.730857	0.599265	0.861815	SA0881	-	NWMN_0894	5' nucleotidase
NWMN_1517	hypothetical protein	9604	14538	2403	12693	12575	6149	10053	7754	6140	2391	7846	5172	12071	12634	8903.5	5118.5	1.04664	0.737594	0.424033	L		NWMN_0642	major facilitator super superfamily	0.692819	0.666607	0.862837	SA0628	-	NWMN_0642	major facilitator super superfamily
NWMN_1518	hypothetical protein	11292	14722	2710	12256	12503	6643	11158	226.3	5999	6141	7632	4882	13007	12379.5	5692.15	6886.5	0.951757	0.437622	0.529446	S		NWMN_0568	hypothetical protein	0.620164	0.684602	0.862926	SA0556	-	NWMN_0568	hypothetical protein
NWMN_1519	alanyl-tRNA synthetase	2584	3384	1994	2947	1020	2414	2054	2498	2059	3605	3014	1569	2984	1983.5	2276	3309.5	0.664712	0.762735	1.10908	J		NWMN_1290	oligopeptide ABC transporter ATP-binding protein	0.773802	0.758377	0.862941	SA1211	opp-2F	NWMN_1290	oligopeptide ABC transporter ATP-binding protein
NWMN_1520	helicase RecD/TraA	2710	3630	1714	1723	2208	1266	2560	1997	1652	3057	2852	1484	3170	1965.5	2278.5	2954.5	0.620032	0.71877	0.932019	L		NWMN_0950	phosphoenolpyruvate-protein phosphotransferase	0.795102	1.07707	0.863201	SA0935	ptsI	NWMN_0950	phosphoenolpyruvate-protein phosphotransferase
NWMN_1521	TPR domain-containing protein	1465	1855	495.5	1088	1282	368.6	1148	963.5	559.2	1565	1096	350.4	1660	1185	1055.75	1330.5	0.713855	0.635994	0.801506	R		NWMN_1415	maltose operon transcriptional repressor	0.83632	0.623495	0.863204	SA1339	malR	marR	maltose operon transcriptional repressor
NWMN_1522	hypothetical protein	4693	4700	1091	3071	4084	2567	3482	3106	2301	2932	3784	2093	4696.5	3577.5	3294	3358	0.761737	0.701373	0.715001			NWMN_0550	heme peroxidase	0.91128	0.816644	0.863284	SA0544	ywfI	NWMN_0550	heme peroxidase
NWMN_1523	tRNA (5-methylaminomethyl-2-thiouridylate)- methyltransferase	4243	3735	2554	2856	3700	2696	3081	2587	2145	3093	3168	2059	3989	3278	2834	3130.5	0.82176	0.710454	0.784783	J		NWMN_1277	prephenate dehydrogenase	0.748905	0.723206	0.863316	SA1197	tyrA	tyrA	prephenate dehydrogenase
NWMN_1524	aminotransferase class V	6657	6854	3177	5159	7370	4301	4375	4500	3077	5346	4514	2499	6755.5	6264.5	4437.5	4930	0.927318	0.656872	0.729776	E		NWMN_2040	pyrimidine-nucleoside phosphorylase	0.703828	0.654487	0.863385	SA1938	pdp	pdp	pyrimidine-nucleoside phosphorylase
NWMN_1525	luciferase	578.4	985.1	306.4	566.3	1089	341.2	347.7	535.4	234.8	429.8	511.1	181.5	781.75	827.65	441.55	470.45	1.05871	0.564823	0.601791	C		NWMN_0881	enoyl-(acyl carrier protein) reductase	0.850416	0.645854	0.86387	SA0869	fabI	NWMN_0881	enoyl-(acyl carrier protein) reductase
NWMN_1528	Rrf2	7339.71	11093.4	2768.14	7140	9008.14	3412.86	5673.57	6443.57	3988.43	8668.57	7599	2165	9216.57	8074.07	6058.57	8133.79	0.876039	0.657356	0.882518	K		NWMN_0713	hypothetical protein	0.929165	0.644718	0.863874	SA0699	-	NWMN_0713	hypothetical protein
NWMN_1529	recombination factor protein RarA	5738	8852	3591	4510	5916	3777	4826	4918	3756	6498	6256	2887	7295	5213	4872	6377	0.714599	0.667855	0.87416	L		NWMN_0879	magnesium transporter	0.79919	0.552803	0.863983	SA0867	mgtE	NWMN_0879	magnesium transporter
NWMN_1530	hypothetical protein	3519	3411	1166	2838	2653	1608	3245	202	1442	2058	2904	1560	3465	2745.5	1723.5	2481	0.792352	0.497403	0.716017	H		NWMN_0445	Orn/Lys/Arg decarboxylase	0.878856	0.824419	0.864077	SA0439	ldcC	tmk	Orn/Lys/Arg decarboxylase
NWMN_1531	hypothetical protein	20746	21007	33726	22987	22814	12800	48008	27723	34160	35642	28570	24514	20876.5	22900.5	37865.5	32106	1.09695	1.81379	1.5379			NWMN_1622	tyrosyl-tRNA synthetase	0.839754	0.800702	0.864561	SA1550	tyrS	tyrS	tyrosyl-tRNA synthetase
NWMN_1532	aspartyl-tRNA synthetase	1139.26	1765.71	916.029	990.257	1331.77	866.143	1476.14	1233.2	963.886	1645.26	1557.2	969.914	1452.49	1161.01	1354.67	1601.23	0.799329	0.932657	1.10241	J		NWMN_0749	ribonuclease R	0.800927	0.89078	0.864872	SA0735	rnr	NWMN_0749	ribonuclease R
NWMN_1533	histidyl-tRNA synthetase	2347	2994	760.3	1730	2178	1124	2101	1446	790.3	2262	1584	618.3	2670.5	1954	1773.5	1923	0.731698	0.664108	0.72009	J		NWMN_0962	dihydrolipoamide dehydrogenase	0.817015	0.943788	0.865011	SA0946	pdhD	pdhD	dihydrolipoamide dehydrogenase
NWMN_1534	N-acetylmuramoyl-L-alanine amidase	2577.2	4422.6	1457.44	2217.2	2599.8	722.48	2326.6	2411.2	1189.96	3325.4	3145.8	822.4	3499.9	2408.5	2368.9	3235.6	0.688163	0.676848	0.924484	M		NWMN_0938	amidophosphoribosyltransferase	1.02282	0.721524	0.865159	SA0922	purF	purF	amidophosphoribosyltransferase
NWMN_1535	D-tyrosyl-tRNA deacylase	8584	12045	6795	7602	9480	4815	8513	9430	6206	10666	10079	4602	10314.5	8541	8971.5	10372.5	0.828058	0.869795	1.00562	J		NWMN_1615	osmotic stress-related protein	0.84221	0.746097	0.865932	SA1543	ohr	NWMN_1615	osmotic stress-related protein
NWMN_1536	GTP pyrophosphokinase	13010.3	14609.7	6417.67	9033.33	11082.3	6102.33	8910	9967	5903	12286	12002.7	4628.33	13810	10057.8	9438.5	12144.3	0.728301	0.683454	0.879387	T		NWMN_2248	CorA-like Mg2+ transporter protein	1.03177	0.655152	0.866055	SA2137	corA	NWMN_2248	CorA-like Mg2+ transporter protein
NWMN_1537	adenine phosphoribosyltransferase	808.629	780.986	544.414	632	655.743	415	781.7	435.114	444.029	331.414	766.571	331.571	794.807	643.871	608.407	548.993	0.810098	0.765478	0.690725	F		NWMN_1126	methionyl-tRNA formyltransferase	0.748147	0.604187	0.866114	SA1059	fmt	fmt	methionyl-tRNA formyltransferase
NWMN_1538	single-stranded-DNA-specific exonuclease RecJ	1783	1797	1107	947.4	1364	1098	1307	1442	956.2	1829	1797	784.6	1790	1155.7	1374.5	1813	0.645642	0.767877	1.01285	L		NWMN_1428	exodeoxyribonuclease VII large subunit	0.724536	0.61699	0.866309	SA1354	xseA	xseA	exodeoxyribonuclease VII large subunit
NWMN_1539	bifunctional preprotein translocase subunit SecD/SecF	2694	3650	1665	2739	3629	2065	2325	2379	1429	3609	2729	1250	3172	3184	2352	3169	1.00378	0.741488	0.999054	U		NWMN_2239	aldose 1-epimerase	1.00342	0.688023	0.86633	SA2129	galM	NWMN_2239	aldose 1-epimerase
NWMN_1540	preprotein translocase YajC subunit	2846	3799	1299	1987	3946	3338	2583	1826	1648	2714	2515	1592	3322.5	2966.5	2204.5	2614.5	0.892852	0.663506	0.786907	U		NWMN_0629	sensor histidine kinase	0.682908	0.685714	0.866582	SA0615	graS	NWMN_0629	sensor histidine kinase
NWMN_1541	queuine tRNA-ribosyltransferase	5072.71	3614.29	1937	3136.71	3854.86	2309.71	3630	2776.43	2148.71	4152.14	3934.29	2420.57	4343.5	3495.79	3203.21	4043.21	0.804832	0.737473	0.930865	J		NWMN_1979	hypothetical protein	0.910919	0.608934	0.866887	SA1878	-	NWMN_1979	hypothetical protein
NWMN_1542	S-adenosylmethionine:tRNA ribosyltransferase-isomerase	7004.71	4831.29	2650	4027.14	5672.71	3648	3676.14	3594.86	2695.57	5603.71	4964.86	3085.14	5918	4849.93	3635.5	5284.29	0.819522	0.614312	0.892917	J		NWMN_2158	sugar transporter	1.18034	0.808008	0.867042	SA2053	glcU	NWMN_2158	sugar transporter
NWMN_1543	Holliday junction DNA helicase B	10748	7843.5	4326	6948	9293.5	6534.5	5351	4236	4662	8516.5	7944.5	5357.5	9295.75	8120.75	4793.5	8230.5	0.873598	0.515666	0.885405	L		NWMN_0565	hypothetical protein	0.621398	0.828386	0.867242	SA0554	-	NWMN_0565	hypothetical protein
NWMN_1544	Holliday junction DNA helicase RuvA	11257	7192	4195	7651	9294	6529	6142	6340	4809	9571	8573	5444	9224.5	8472.5	6241	9072	0.918478	0.676568	0.983468	L		NWMN_1264	hypothetical protein	0.775725	0.755169	0.867368	SA1185	-	NWMN_1264	hypothetical protein
NWMN_1545	hypothetical protein	8754	7259	3505	6404	8532	6003	4747	5481	4069	7760	7382	4637	8006.5	7468	5114	7571	0.932742	0.638731	0.945607	R		NWMN_1562	delta-aminolevulinic acid dehydratase	0.897818	0.731136	0.867515	SA1492	hemB	hemB	delta-aminolevulinic acid dehydratase
[truncated: 987 more rows]

## Sheet: Virulence factors
Table S2.Expression of Virulence Factors by Staphylococcus aureus Grown in Serum
In.Newman	SA	pan.gene.symbol	symbol	Description	RatioSTP	RatioPKN	RatioDouble
[truncated: 78 more rows]
