# Supplementary material for: Staphylococcus aureus Transcriptome Data and Metabolic Modelling Investigate the Interplay of Ser/Thr Kinase PknB, Its Phosphatase Stp, the glmR/yvcK Regulon and the cdaA Operon for Metabolic Adaptation
Source: Microorganisms. 2021 Oct 14;9(10):2148. doi: 10.3390/microorganisms9102148 (PMC8537086; doi:10.3390/microorganisms9102148)
Supplement: Supplementary file 1 [file microorganisms-09-02148-s001.zip › suppl3_TableS3_Enzyme activities of each mutant compared to the WT .xlsx]

## Sheet: Hoja1
Table S3. Enzyme activities and pathway fluxes of each mutant compared to the WT
EPM	Enzymes	Net reaction	rev	length	WT	PKNB	STP	PKNBSTP	ratio_PKNB/WT	ratio_STP/WT	ratio_PKNBSTP/WT
1	(1 AlaTA)	NADH + NH3 + Pyr = Ala + NAD+	true	1	13.1115150914739	12.9636	11.5582	13.7924	0.988715	0.881529	1.05193
2	(1 ASN)	Asp + NH3 = Asn	true	1	7.73785297010386	7.22393	7.69094	7.73982	0.933583	0.993938	1.00025
3	(1 ButandiolS_EC)	Acetoin + H+ + NADH = Butandiol + NAD+	true	1	13.3494133806273	12.7106	12.7615	12.5875	0.952148	0.955961	0.942926
4	(1 GluDH)	H+ + NADH + NH3 + aKG = Glu + NAD+	true	1	14.8574865533155	14.5063	14.7581	14.7262	0.976362	0.993314	0.991161
5	(1 LacDH)	Lac + NAD+ = H+ + NADH + Pyr	true	1	25.8237969827019	24.8544	24.164	25.067	0.962461	0.935726	0.970693
6	(1 OrnCyc)	Orn = NH3 + Pro	true	1	7.86883167994235	7.3089	6.79774	7.08448	0.928842	0.863881	0.900322
7	(1 SerALD)	Ser + THF = Gly + MTHF	true	1	15.9918247005686	15.8767	15.9355	15.9796	0.992799	0.996476	0.999238
8	(1 GluSemiAldDH) (1 ProO)	Glu + 2 H+ + 2 NADH = 2 NAD+ + Pro	true	2	14.4800330546849	14.1152	14.1248	14.3646	0.974806	0.975466	0.992032
9	(1 ACN) (1 ICitDH)	Cit + 2 NADP+ = CO2 + 2 H+ + 2 NADPH + aKG	true	2	13.5229609166485	13.0776	13.0522	13.5486	0.967069	0.965186	1.0019
10	(1 ADH) (1 ThrALD)	H+ + NADH + Thr = EtOH + Gly + NAD+	true	2	23.1283425460062	13.63	13.3675	13.9784	0.589322	0.57797	0.604385
11	(1 AldDH) (1 ThrALD)	NAD+ + Thr = Acetate + Gly + H+ + NADH	true	2	-13.5798566949749	5.46295	4.89263	5.50011	-0.402283	-0.360286	-0.40502
12	(1 AlaRacemase) (1 D-AlaTA) (-1 GluRacemase)	Ala + aKG = Glu + Pyr	true	3	16.6082794464001	15.7684	16.0177	16.2713	0.949432	0.96444	0.979711
13	(1 AcetoinS_EC)	2 Pyr = Acetoin + 2 CO2	false	1	34.1929513373943	32.5929	33.1027	32.8312	0.953204	0.968114	0.960176
14	(1 BCAA_Ile)	Ile = BCFA	false	1	50	50	50	50	1	1	1
15	(1 BCAA_Leu)	Leu = BCFA	false	1	50	50	50	50	1	1	1
16	(1 BCAA_Val)	Val = BCFA	false	1	50	50	50	50	1	1	1
17	(1 FormateDH)	Formate + NAD+ = CO2 + NADH	false	1	11.0062756825822	10.5066	10.6774	10.8084	0.954602	0.970119	0.982021
18	(1 GlnS)	ATP + Glu + NH3 = ADP + Gln + P	false	1	13.8247979569175	13.6775	13.2198	13.6036	0.989343	0.956239	0.984002
19	(1 GluS)	Gln + 2 H+ + NADPH + aKG = 2 Glu + NADP+	false	1	22.705423083371	21.6877	23.0831	21.3655	0.955178	1.01664	0.940988
20	(1 GlyCleavageSys)	Gly + THF = MTHF + NH3	false	1	11.4273069642824	11.1955	11.0465	11.2928	0.979718	0.966675	0.988232
21	(1 HisMeta_EC)	His = Formate + Glu + 2 NH3	false	1	11.5570446673355	10.9899	11.4807	10.5585	0.950925	0.99339	0.913602
22	(1 IleS_EC)	Glu + H+ + NADPH + Pyr + Thr = CO2 + Ile + NADP+ + NH3 + aKG	false	1	11.7716098300846	10.8301	10.1685	11.2278	0.920022	0.863812	0.953802
23	(1 NADH_OP)	3 ADP + H+ + NADH + O + 3 P = 3 ATP + NAD+	false	1	50	50	50	50	1	1	1
24	(1 NADK)	ATP + NAD+ = ADP + NADP+	false	1	12.9586912632895	12.2694	12.6021	12.5524	0.946806	0.972483	0.968644
25	(1 OrnS_EC)	ATP + 2 Glu + H+ + NADPH = ADP + NADP+ + Orn + P + aKG	false	1	9.02151792667601	8.17285	8.39603	8.56289	0.905928	0.930667	0.949163
26	(1 SerDHA)	Ser = NH3 + Pyr	false	1	9.36059176417484	9.04583	9.29088	9.41299	0.966374	0.992553	1.0056
27	(1 ValS_EC)	Glu + H+ + NADPH + 2 Pyr = CO2 + NADP+ + Val + aKG	false	1	10.6411587039203	9.85313	8.29997	10.0175	0.925945	0.779987	0.94139
28	(1 DHFR) (1 DHFS) (1 DHPS)	ATP + DHPTPP + Glu + H+ + NADH + PABA = ADP + NAD+ + P + PP + THF	false	3	12.5644565743925	12.2077	12.2316	12.1785	0.971606	0.973512	0.96928
29	(1 ARG) (1 Urease)	Arg = CO2 + 2 NH3 + Orn	false	2	10.8549536312782	10.5433	10.5873	10.8097	0.97129	0.97534	0.995834
30	(1 FBP) (1 PFK)	ATP = ADP + P	false	2	1.04642294442957	0.122185	0.37944	1.09188	0.116764	0.362607	1.04344
31	(1 FTHFL) (1 MethenylTHFCyc) (-1 MethyleneTHFDH)	ATP + Formate + H+ + NADPH + THF = ADP + MTHF + NADP+ + P	false	3	23.4999809173311	23.1365	23.3633	23.375	0.984532	0.994185	0.99468
32	(1 AckA) (1 AcP)	ATP = ADP + P	false	2	15.108766300831	6.74433	15.0913	15.0486	0.446385	0.998846	0.996019
33	(1 AspK) (-1 AspSemiAldDH) (-1 HomoSerDH) (1 HomoSerK) (1 ThrS)	2 ATP + Asp + 2 H+ + NADH + NADPH = 2 ADP + NAD+ + NADP+ + 2 P + Thr	false	5	10.2851954055517	9.49156	9.82602	9.89769	0.922837	0.955356	0.962324
34	(1 AspK) (-1 AspSemiAldDH) (1 DAPDC) (1 DiaminopimS_EC) (1 SuccCoAS)	2 ATP + Asp + Glu + 2 H+ + NADH + NADPH + Pyr = 2 ADP + CO2 + Lys + NAD+ + NADP+ + 2 P + aKG	false	5	12.9287535072543	12.1976	12.4748	12.5603	0.943445	0.964886	0.971499
35	(1 CarbaK) (-1 CPS)	ADP + CO2 + Glu + NH3 + P = ATP + Gln + HCO3-	false	2	10.07200130561	9.49792	10.0093	9.71607	0.943002	0.993779	0.964661
36	(1 ArgDeimi) (-1 CPS) (-1 OTC)	2 ADP + Arg + Glu + 2 P = 2 ATP + Gln + HCO3- + NH3 + Orn	false	3	12.0292018467727	11.4866	11.8749	11.3592	0.954893	0.987171	0.944301
37	(1 ArgSuccLya) (1 ArgSuccS) (1 CPS) (1 FUM) (1 Mae) (1 OTC)	3 ATP + Asp + Gln + HCO3- + NADP+ + Orn = 2 ADP + AMP + Arg + CO2 + Glu + H+ + NADPH + 2 P + PP + Pyr	false	6	0	1.66761	0	0	#DIV/0!	#DIV/0!	#DIV/0!
38	(5 ATPS) (1 CytochromeCO) (2 NADHQOR) (2 QCytoOR)	5 ADP + 2 H+ + 2 NADH + 2 O + 5 P = 5 ATP + 2 NAD+	false	4	0	0	0	0	#DIV/0!	#DIV/0!	#DIV/0!
39	(1 GOT) (1 PyrC)	ATP + Glu + HCO3- + Pyr = ADP + Asp + P + aKG	false	2	13.180108463126	12.4395	13.1055	12.8442	0.943806	0.99434	0.974515
40	(1 ATPS) (-1 GOT) (1 Mae) (-1 Mqo) (1 NADHQOR)	ADP + Asp + NADH + NADP+ + P + aKG = ATP + CO2 + Glu + NAD+ + NADPH + Pyr	false	5	0	0	0	0	#DIV/0!	#DIV/0!	#DIV/0!
41	(1 AKGDC_EC) (1 FUM) (-1 GOT) (2 Mae) (-1 Mqo) (-1 SuccCoAS) (1 SuccDH)	ADP + Asp + NAD+ + 2 NADP+ + P + 2 aKG = ATP + 3 CO2 + Glu + 3 H+ + NADH + 2 NADPH + 2 Pyr	false	7	0	0	0	0	#DIV/0!	#DIV/0!	#DIV/0!
42	(1 AKGDC_EC) (3 ATPS) (1 CytochromeCO) (1 FUM) (1 GOT) (1 Mqo) (2 QCytoOR) (-1 SuccCoAS) (1 SuccDH)	4 ADP + Glu + NAD+ + 2 O + 4 P = 4 ATP + Asp + CO2 + H+ + NADH	false	9	3.46026103611442	3.58965	3.07749	3.42557	1.03739	0.88938	0.989974
43	(2 ArgSuccLya) (2 ArgSuccS) (3 ATPS) (2 CPS) (1 CytochromeCO) (2 FUM) (2 GOT) (2 Mqo) (2 OTC) (2 QCytoOR)	3 ATP + 2 Gln + 2 HCO3- + 2 O + 2 Orn = ADP + 2 AMP + 2 Arg + P + 2 PP + 2 aKG	false	10	1.50953674820812	0.677545	1.50417	1.4287	0.448843	0.996445	0.946452
44	(3 6PGL) (1 ENO) (3 G6PDH) (1 GAPDH) (1 GlcPTS) (3 PGADH) (-2 PGI) (1 PGK) (1 PGM) (1 R5PI) (2 RPE) (1 TA) (1 TK1) (-1 TK2)	ADP + Glc_X + NAD+ + 6 NADP+ + P = ATP + 3 CO2 + 7 H+ + NADH + 6 NADPH + Pyr	false	14	2.76331316417506	0.848245	1.86326	0.67567	0.306967	0.674285	0.244515
45	(-1 GOT) (1 PEPCK) (1 PyrK)	Asp + aKG = CO2 + Glu + Pyr	false	3	3.66106045894476	3.96293	3.57227	3.95611	1.08245	0.975747	1.08059
46	(1 ChorS) (1 DAHPS) (1 DHQ) (1 DHQS) (1 EPSPS) (1 GlcK) (-2 GOT) (2 PEPCK) (1 PGI) (1 PRPPK) (1 R5PI) (-1 RPE) (1 ShiDH) (1 ShiK) (1 TK2) (1 TrpS_EC)	5 ATP + 2 Asp + Glc_X + Gln + H+ + NADPH + Ser + 2 aKG = 4 ADP + AMP + 3 CO2 + 3 Glu + NADP+ + 4 P + PP + Pyr + Trp	false	16	0	0	0	0	#DIV/0!	#DIV/0!	#DIV/0!
47	(1 ChorS) (1 DAHPS) (1 DHQ) (1 DHQS) (1 EPSPS) (1 GlcPTS) (-3 GOT) (3 PEPCK) (1 PGI) (1 PRPPK) (1 R5PI) (-1 RPE) (1 ShiDH) (1 ShiK) (1 TK2) (1 TrpS_EC)	5 ATP + 3 Asp + Glc_X + Gln + H+ + NADPH + Ser + 3 aKG = 4 ADP + AMP + 4 CO2 + 4 Glu + NADP+ + 4 P + PP + 2 Pyr + Trp	false	16	0	0	0	0	#DIV/0!	#DIV/0!	#DIV/0!
48	(3 ADSL) (3 AIRC) (3 AIRS) (5 ATPS) (2 CytochromeCO) (-1 ENO) (3 FGAMS) (3 FUM) (-1 GAPDH) (3 GAR) (3 GARTF) (2 GlcPTS) (3 IMPCyc) (-6 MethenylTHFCyc) (6 MethyleneTHFDH) (3 Mqo) (3 PEPCK) (2 PGI) (-1 PGK) (-1 PGM) (3 PRPPK) (3 PRPPTA) (3 QCytoOR) (2 R5PI) (-2 RPE) (3 SAICARS) (-1 TA) (-1 TK1) (1 TK2)	14 ATP + 3 Asp + 2 CytCred + 2 Glc_X + 6 Gln + 3 Gly + 6 MTHF + NADH + 6 NADP+ + 4 O = 11 ADP + 3 AMP + 2 CytCox + 6 Glu + 3 H+ + NAD+ + 6 NADPH + 8 P + 3 PP + 2 Pyr + 6 THF + 3 purine	false	29	0	0	0	0	#DIV/0!	#DIV/0!	#DIV/0!
49	(1 ENO) (1 GAPDH) (-1 Glycerol3PDH) (1 GlycerolK) (1 GOT) (-1 PEPCK) (1 PGK) (1 PGM) (1 TPI)	ADP + CO2 + Glu + Glycerol + 2 NAD+ = ATP + Asp + 2 H+ + 2 NADH + aKG	false	9	13.8154343693865	13.2893	13.6972	13.582	0.96192	0.991441	0.983104
50	(2 ENO) (1 FBPALD) (2 GAPDH) (1 GlcK) (2 GOT) (-2 PEPCK) (1 PFK) (1 PGI) (2 PGK) (2 PGM) (1 TPI)	2 ADP + 2 CO2 + Glc_X + 2 Glu + 2 NAD+ + 2 P = 2 ATP + 2 Asp + 2 H+ + 2 NADH + 2 aKG	false	11	13.2145232825331	13.7134	13.6608	13.2818	1.03775	1.03377	1.00509
51	(3 6PGL) (1 ENO) (3 G6PDH) (1 GAPDH) (1 GlcK) (1 GOT) (-1 PEPCK) (3 PGADH) (-2 PGI) (1 PGK) (1 PGM) (1 R5PI) (2 RPE) (1 TA) (1 TK1) (-1 TK2)	ADP + Glc_X + Glu + NAD+ + 6 NADP+ + P = ATP + Asp + 2 CO2 + 7 H+ + NADH + 6 NADPH + aKG	false	16	1.96532802310363	0.473066	0.59979	0.163886	0.240706	0.305186	0.0833885
52	(2 ENO) (1 FBPALD) (2 GAPDH) (1 GlcPTS) (1 GOT) (-1 PEPCK) (1 PFK) (1 PGI) (2 PGK) (2 PGM) (1 TPI)	2 ADP + CO2 + Glc_X + Glu + 2 NAD+ + 2 P = 2 ATP + Asp + 2 H+ + 2 NADH + Pyr + aKG	false	11	2.73575450288079	2.47321	2.59161	2.21573	0.904033	0.947311	0.809914
53	(-1 ENO) (-1 GAPDH) (1 Glycerol3PDH) (-1 GOT) (1 LipidProduct) (1 PEPCK) (-1 PGK) (-1 PGM) (-1 TPI)	2 ATP + Asp + 2 H+ + 2 NADH + aKG = 2 ADP + CO2 + Glu + Glycerol3P_X + 2 NAD+ + P	false	9	0	0	0	0	#DIV/0!	#DIV/0!	#DIV/0!
54	(-1 ENO) (-1 GAPDH) (2 GlcK) (-1 GOT) (3 HisCyc) (3 HisS_EC) (3 IMPCyc) (-3 MethenylTHFCyc) (3 MethyleneTHFDH) (1 PEPCK) (2 PGI) (-1 PGK) (-1 PGM) (3 PRATPPPH) (3 PRATPS) (3 PRFAICARPI) (3 PRPPK) (2 R5PI) (-2 RPE) (-1 TA) (-1 TK1) (1 TK2)	10 ATP + Asp + 2 Glc_X + 3 Gln + 3 MTHF + 5 NAD+ + 3 NADP+ = 4 ADP + 3 AMP + CO2 + Glu + 8 H+ + 3 His + 5 NADH + 3 NADPH + 4 P + 6 PP + 3 THF + 2 aKG + 3 purine	false	22	0.339930991459493	0.0946153	0.41567	0.340246	0.278337	1.22281	1.00093
55	(3 ATC) (3 CPS) (3 DHO) (3 DHODH) (-1 ENO) (-1 GAPDH) (2 GlcK) (-1 GOT) (3 OMPDC) (3 OPRT) (1 PEPCK) (2 PGI) (-1 PGK) (-1 PGM) (3 PRPPK) (2 R5PI) (-2 RPE) (-1 TA) (-1 TK1) (1 TK2)	13 ATP + 4 Asp + 2 Glc_X + 3 Gln + H+ + 3 HCO3- + NADH + 6 O + aKG = 10 ADP + 3 AMP + 4 CO2 + 4 Glu + 3 H2O2 + NAD+ + 7 P + 3 PP + 3 pyrimidine	false	20	1.0779182446289	1.1265	0.590802	0.677473	1.04507	0.548096	0.628501
56	(3 ADSL) (3 AIRC) (3 AIRS) (-1 ENO) (3 FGAMS) (3 FUM) (-1 GAPDH) (3 GAR) (3 GARTF) (2 GlcK) (-1 GOT) (3 IMPCyc) (3 Mae) (-6 MethenylTHFCyc) (6 MethyleneTHFDH) (1 PEPCK) (2 PGI) (-1 PGK) (-1 PGM) (3 PRPPK) (3 PRPPTA) (2 R5PI) (-2 RPE) (3 SAICARS) (-1 TA) (-1 TK1) (1 TK2)	19 ATP + 4 Asp + 2 Glc_X + 6 Gln + 3 Gly + 6 MTHF + NADH + 9 NADP+ + aKG = 16 ADP + 3 AMP + CO2 + 7 Glu + 8 H+ + NAD+ + 9 NADPH + 13 P + 3 PP + 3 Pyr + 6 THF + 3 purine	false	27	0.565217222162726	0.203896	0.714297	0.761617	0.360739	1.26376	1.34748
57	(3 6PGL) (-1 ENO) (1 FBP) (-1 FBPALD) (3 G6PDH) (-1 GAPDH) (-1 GOT) (1 PEPCK) (3 PGADH) (-3 PGI) (-1 PGK) (-1 PGM) (1 R5PI) (2 RPE) (1 TA) (1 TK1) (-1 TK2) (-1 TPI)	2 ATP + Asp + NADH + 6 NADP+ + aKG = 2 ADP + 4 CO2 + Glu + 5 H+ + NAD+ + 6 NADPH + 2 P	false	18	0.0686582169794665	3.26093	2.19832	3.81651	47.4952	32.0184	55.587
58	(-5 ENO) (2 FBP) (-2 FBPALD) (-5 GAPDH) (-5 GOT) (3 HisCyc) (3 HisS_EC) (3 IMPCyc) (-3 MethenylTHFCyc) (3 MethyleneTHFDH) (5 PEPCK) (-5 PGK) (-5 PGM) (3 PRATPPPH) (3 PRATPS) (3 PRFAICARPI) (3 PRPPK) (2 R5PI) (-2 RPE) (-1 TA) (-1 TK1) (1 TK2) (-2 TPI)	16 ATP + 5 Asp + 3 Gln + 3 MTHF + NAD+ + 3 NADP+ + 2 aKG = 10 ADP + 3 AMP + 5 CO2 + 5 Glu + 4 H+ + 3 His + NADH + 3 NADPH + 10 P + 6 PP + 3 THF + 3 purine	false	23	0.649535784597405	0.341003	0.262138	0.0487775	0.524995	0.403578	0.075096
59	(3 ATC) (3 CPS) (3 DHO) (3 DHODH) (-5 ENO) (2 FBP) (-2 FBPALD) (-5 GAPDH) (-5 GOT) (3 OMPDC) (3 OPRT) (5 PEPCK) (-5 PGK) (-5 PGM) (3 PRPPK) (2 R5PI) (-2 RPE) (-1 TA) (-1 TK1) (1 TK2) (-2 TPI)	19 ATP + 8 Asp + 3 Gln + 5 H+ + 3 HCO3- + 5 NADH + 6 O + 5 aKG = 16 ADP + 3 AMP + 8 CO2 + 8 Glu + 3 H2O2 + 5 NAD+ + 13 P + 3 PP + 3 pyrimidine	false	21	0.62751691339024	0.441064	0.614484	1.06331	0.702872	0.979231	1.69447
60	(3 ADSL) (3 AIRC) (3 AIRS) (-5 ENO) (2 FBP) (-2 FBPALD) (3 FGAMS) (3 FUM) (-5 GAPDH) (3 GAR) (3 GARTF) (-5 GOT) (3 IMPCyc) (3 Mae) (-6 MethenylTHFCyc) (6 MethyleneTHFDH) (5 PEPCK) (-5 PGK) (-5 PGM) (3 PRPPK) (3 PRPPTA) (2 R5PI) (-2 RPE) (3 SAICARS) (-1 TA) (-1 TK1) (1 TK2) (-2 TPI)	25 ATP + 8 Asp + 6 Gln + 3 Gly + 6 MTHF + 5 NADH + 9 NADP+ + 5 aKG = 22 ADP + 3 AMP + 5 CO2 + 11 Glu + 4 H+ + 5 NAD+ + 9 NADPH + 19 P + 3 PP + 3 Pyr + 6 THF + 3 purine	false	28	0.682912149690774	1.48151	0.977123	0.490024	2.16939	1.43082	0.71755
61	(3 ChorM) (3 ChorS) (3 DAHPS) (3 DHQ) (3 DHQS) (-2 ENO) (3 EPSPS) (-2 GAPDH) (1 GlcK) (-8 GOT) (3 IAPTA2) (8 PEPCK) (1 PGI) (-2 PGK) (-2 PGM) (3 PrephDH_EC) (1 R5PI) (-1 RPE) (3 ShiDH) (3 ShiK) (1 TA) (1 TK1) (2 TK2)	14 ATP + 8 Asp + Glc_X + 5 H+ + NAD+ + 3 NADPH + 5 aKG = 14 ADP + 11 CO2 + 5 Glu + NADH + 3 NADP+ + 14 P + 3 Tyr	false	23	1.07724566869128	0.505564	0.286493	0.801817	0.469311	0.26595	0.744321
62	(3 ChorM) (3 ChorS) (3 DAHPS) (3 DHQ) (3 DHQS) (-2 ENO) (3 EPSPS) (-2 GAPDH) (1 GlcK) (-8 GOT) (3 IAPTA1) (8 PEPCK) (1 PGI) (-2 PGK) (-2 PGM) (3 PrephDHA) (1 R5PI) (-1 RPE) (3 ShiDH) (3 ShiK) (1 TA) (1 TK1) (2 TK2)	14 ATP + 8 Asp + Glc_X + 5 H+ + 2 NADH + 3 NADPH + 5 aKG = 14 ADP + 11 CO2 + 5 Glu + 2 NAD+ + 3 NADP+ + 14 P + 3 Phe	false	23	0.164591987150477	0.510856	0.308202	0.535222	3.10377	1.87252	3.25181
63	(3 ChorM) (3 ChorS) (3 DAHPS) (3 DHQ) (3 DHQS) (-2 ENO) (3 EPSPS) (-2 GAPDH) (1 GlcPTS) (-9 GOT) (3 IAPTA2) (9 PEPCK) (1 PGI) (-2 PGK) (-2 PGM) (3 PrephDH_EC) (1 R5PI) (-1 RPE) (3 ShiDH) (3 ShiK) (1 TA) (1 TK1) (2 TK2)	14 ATP + 9 Asp + Glc_X + 5 H+ + NAD+ + 3 NADPH + 6 aKG = 14 ADP + 12 CO2 + 6 Glu + NADH + 3 NADP+ + 14 P + Pyr + 3 Tyr	false	23	0.483224375200738	1.02456	0.535109	0.864463	2.12026	1.10737	1.78895
64	(3 ChorM) (3 ChorS) (3 DAHPS) (3 DHQ) (3 DHQS) (-2 ENO) (3 EPSPS) (-2 GAPDH) (1 GlcPTS) (-9 GOT) (3 IAPTA1) (9 PEPCK) (1 PGI) (-2 PGK) (-2 PGM) (3 PrephDHA) (1 R5PI) (-1 RPE) (3 ShiDH) (3 ShiK) (1 TA) (1 TK1) (2 TK2)	14 ATP + 9 Asp + Glc_X + 5 H+ + 2 NADH + 3 NADPH + 6 aKG = 14 ADP + 12 CO2 + 6 Glu + 2 NAD+ + 3 NADP+ + 14 P + 3 Phe + Pyr	false	23	0.365537339387673	0.778754	0.822361	0.704243	2.13044	2.24973	1.9266
65	(-1 ENO) (-1 GAPDH) (2 GlcPTS) (-3 GOT) (3 HisCyc) (3 HisS_EC) (3 IMPCyc) (-3 MethenylTHFCyc) (3 MethyleneTHFDH) (3 PEPCK) (2 PGI) (-1 PGK) (-1 PGM) (3 PRATPPPH) (3 PRATPS) (3 PRFAICARPI) (3 PRPPK) (2 R5PI) (-2 RPE) (-1 TA) (-1 TK1) (1 TK2)	10 ATP + 3 Asp + 2 Glc_X + 3 Gln + 3 MTHF + 5 NAD+ + 3 NADP+ = 4 ADP + 3 AMP + 3 CO2 + 3 Glu + 8 H+ + 3 His + 5 NADH + 3 NADPH + 4 P + 6 PP + 2 Pyr + 3 THF + 3 purine	false	22	0.107451369355398	0.517214	0.247483	0.58848	4.81347	2.30321	5.47671
66	(3 ATC) (3 CPS) (3 DHO) (3 DHODH) (-1 ENO) (-1 GAPDH) (2 GlcPTS) (-3 GOT) (3 OMPDC) (3 OPRT) (3 PEPCK) (2 PGI) (-1 PGK) (-1 PGM) (3 PRPPK) (2 R5PI) (-2 RPE) (-1 TA) (-1 TK1) (1 TK2)	13 ATP + 6 Asp + 2 Glc_X + 3 Gln + H+ + 3 HCO3- + NADH + 6 O + 3 aKG = 10 ADP + 3 AMP + 6 CO2 + 6 Glu + 3 H2O2 + NAD+ + 7 P + 3 PP + 2 Pyr + 3 pyrimidine	false	20	0.664455190656954	0.66221	1.18489	0.587724	0.996621	1.78325	0.88452
67	(3 ADSL) (3 AIRC) (3 AIRS) (-1 ENO) (3 FGAMS) (3 FUM) (-1 GAPDH) (3 GAR) (3 GARTF) (2 GlcPTS) (-3 GOT) (3 IMPCyc) (3 Mae) (-6 MethenylTHFCyc) (6 MethyleneTHFDH) (3 PEPCK) (2 PGI) (-1 PGK) (-1 PGM) (3 PRPPK) (3 PRPPTA) (2 R5PI) (-2 RPE) (3 SAICARS) (-1 TA) (-1 TK1) (1 TK2)	19 ATP + 6 Asp + 2 Glc_X + 6 Gln + 3 Gly + 6 MTHF + NADH + 9 NADP+ + 3 aKG = 16 ADP + 3 AMP + 3 CO2 + 9 Glu + 8 H+ + NAD+ + 9 NADPH + 13 P + 3 PP + 5 Pyr + 6 THF + 3 purine	false	27	0.675284603495118	0.163024	0.239474	0.611095	0.241415	0.354627	0.904945
68	(1 ChorS) (1 DAHPS) (1 DHQ) (1 DHQS) (-2 ENO) (1 EPSPS) (1 FBP) (-1 FBPALD) (-2 GAPDH) (-4 GOT) (4 PEPCK) (-2 PGK) (-2 PGM) (1 PRPPK) (1 R5PI) (-1 RPE) (1 ShiDH) (1 ShiK) (1 TK2) (-1 TPI) (1 TrpS_EC)	8 ATP + 4 Asp + Gln + 3 H+ + 2 NADH + NADPH + Ser + 4 aKG = 7 ADP + AMP + 5 CO2 + 5 Glu + 2 NAD+ + NADP+ + 7 P + PP + Pyr + Trp	false	21	0	0	0	0	#DIV/0!	#DIV/0!	#DIV/0!
69	(3 ChorM) (3 ChorS) (3 DAHPS) (3 DHQ) (3 DHQS) (-4 ENO) (3 EPSPS) (1 FBP) (-1 FBPALD) (-4 GAPDH) (-10 GOT) (3 IAPTA2) (10 PEPCK) (-4 PGK) (-4 PGM) (3 PrephDH_EC) (1 R5PI) (-1 RPE) (3 ShiDH) (3 ShiK) (1 TA) (1 TK1) (2 TK2) (-1 TPI)	17 ATP + 10 Asp + 7 H+ + NADH + 3 NADPH + 7 aKG = 17 ADP + 13 CO2 + 7 Glu + NAD+ + 3 NADP+ + 17 P + 3 Tyr	false	24	0.360088218369014	0.27305	1.05718	0.172977	0.758288	2.93588	0.480375
70	(3 ChorM) (3 ChorS) (3 DAHPS) (3 DHQ) (3 DHQS) (-4 ENO) (3 EPSPS) (1 FBP) (-1 FBPALD) (-4 GAPDH) (-10 GOT) (3 IAPTA1) (10 PEPCK) (-4 PGK) (-4 PGM) (3 PrephDHA) (1 R5PI) (-1 RPE) (3 ShiDH) (3 ShiK) (1 TA) (1 TK1) (2 TK2) (-1 TPI)	17 ATP + 10 Asp + 7 H+ + 4 NADH + 3 NADPH + 7 aKG = 17 ADP + 13 CO2 + 7 Glu + 4 NAD+ + 3 NADP+ + 17 P + 3 Phe	false	24	1.01837330572157	0.163874	0.38714	0.202279	0.160918	0.380156	0.19863
71	(3 ADSL) (3 AIRC) (3 AIRS) (5 ATPS) (2 CytochromeCO) (-5 ENO) (2 FBP) (-2 FBPALD) (3 FGAMS) (3 FUM) (-5 GAPDH) (3 GAR) (3 GARTF) (-2 GOT) (3 IMPCyc) (-6 MethenylTHFCyc) (6 MethyleneTHFDH) (3 Mqo) (5 PEPCK) (-5 PGK) (-5 PGM) (3 PRPPK) (3 PRPPTA) (3 QCytoOR) (2 R5PI) (-2 RPE) (3 SAICARS) (-1 TA) (-1 TK1) (1 TK2) (-2 TPI)	20 ATP + 5 Asp + 2 CytCred + 6 Gln + 3 Gly + H+ + 6 MTHF + 5 NADH + 6 NADP+ + 4 O + 2 aKG = 17 ADP + 3 AMP + 2 CO2 + 2 CytCox + 8 Glu + 5 NAD+ + 6 NADPH + 14 P + 3 PP + 6 THF + 3 purine	false	31	0	0	0	0	#DIV/0!	#DIV/0!	#DIV/0!
72	(3 ADSL) (3 AIRC) (3 AIRS) (5 ATPS) (2 CytochromeCO) (-1 ENO) (3 FGAMS) (3 FUM) (-1 GAPDH) (3 GAR) (3 GARTF) (2 GlcK) (2 GOT) (3 IMPCyc) (-6 MethenylTHFCyc) (6 MethyleneTHFDH) (3 Mqo) (1 PEPCK) (2 PGI) (-1 PGK) (-1 PGM) (3 PRPPK) (3 PRPPTA) (3 QCytoOR) (2 R5PI) (-2 RPE) (3 SAICARS) (-1 TA) (-1 TK1) (1 TK2)	14 ATP + Asp + 2 CO2 + 2 CytCred + 2 Glc_X + 6 Gln + 3 Gly + 6 MTHF + NADH + 6 NADP+ + 4 O = 11 ADP + 3 AMP + 2 CytCox + 4 Glu + 3 H+ + NAD+ + 6 NADPH + 8 P + 3 PP + 6 THF + 2 aKG + 3 purine	false	30	0	0	0	0	#DIV/0!	#DIV/0!	#DIV/0!
73	(1 AcCoAS) (-1 AckA) (-1 PTA)	ADP = AMP	false	3	18.3170635026517	16.1254	17.5164	17.6079	0.880346	0.956289	0.961284
74	(-1 AckA) (-1 PTA) (1 PyrDH_EC)	ADP + NAD+ + P + Pyr = ATP + Acetate + CO2 + H+ + NADH	false	3	19.7446302390486	17.5995	19.0566	19.0651	0.891354	0.965154	0.965585
75	(-1 AckA) (-1 PTA) (1 PyrFLys)	ADP + P + Pyr = ATP + Acetate + Formate	false	3	19.7327471746485	18.1471	19.4949	19.3607	0.919643	0.987949	0.981146
76	(1 AckA) (1 CysS_EC) (1 PTA)	ATP + H2S + Ser = ADP + Cys + P	false	3	35.5240743501582	36.061	34.6258	33.6358	1.01511	0.974713	0.946846
77	(1 AckA) (1 LeuS_EC) (1 PTA)	ATP + Acetate + Glu + NAD+ + NADPH + 2 Pyr = ADP + 2 CO2 + Leu + NADH + NADP+ + P + aKG	false	3	6.19717141974475	6.79641	4.77592	5.57998	1.0967	0.770662	0.900408
78	(7 AcCoAC) (8 AckA) (1 FAS) (1 FAS_EC) (7 MCAT) (8 PTA)	7 ACProt + 15 ATP + 8 Acetate + 14 H+ + 7 HCO3- + 7 NADH + 7 NADPH = 15 ADP + 7 CO2 + 6 CoA + Hexadecanoate + 7 NAD+ + 7 NADP+ + 15 P	false	6	1.45840759838946	1.39478	1.43334	1.48176	0.956371	0.982813	1.01601
79	(1 AckA) (1 AspK) (-1 AspSemiAldDH) (-1 HomoSerDH) (1 MetS_EC) (1 PTA)	2 ATP + Asp + Cys + 2 H+ + MetTHPTGlu + NADH + NADPH = 2 ADP + Met + NAD+ + NADP+ + NH3 + 2 P + Pyr + THPTGlu	false	6	0	0	0	0	#DIV/0!	#DIV/0!	#DIV/0!
80	(8 AckA) (21 ATPS) (7 CytochromeCO) (1 FAS) (1 FAS_EC) (7 IleMeta_EC) (7 MCAT) (8 PTA) (14 QCytoOR)	7 ACProt + 13 ADP + 8 Acetate + 7 Ile + 7 NAD+ + 7 NADPH + 14 O + 13 P + 7 aKG = 13 ATP + 14 CO2 + 13 CoA + 7 Glu + Hexadecanoate + 7 NADH + 7 NADP+	false	9	0	0.244423	0.0132453	0	#DIV/0!	#DIV/0!	#DIV/0!
81	(1 AckA) (1 CitS) (-1 GOT) (1 PTA)	ATP + Acetate + Asp + aKG = ADP + Cit + Glu + P	false	4	9.27231308480435	10.2061	9.41702	9.30705	1.10071	1.01561	1.00375
82	(8 AckA) (1 FAS) (1 FAS_EC) (-14 GOT) (7 IleMeta_EC) (14 Mae) (7 MCAT) (-14 Mqo) (8 PTA)	7 ACProt + 8 ATP + 8 Acetate + 14 Asp + 7 Ile + 7 NAD+ + 7 NADP+ + 21 aKG = 8 ADP + 28 CO2 + 13 CoA + 21 Glu + 14 H+ + Hexadecanoate + 7 NADH + 7 NADPH + 8 P + 14 Pyr	false	9	0	0	0	0	#DIV/0!	#DIV/0!	#DIV/0!
83	(2 AckA) (1 AlaRacemase) (1 D-alaDimer) (2 GlcK) (1 GluRacemase) (-1 GOT) (1 PEPCK) (2 Peptidoglycan1_EC) (1 Peptidoglycan2_EC) (1 Peptidoglycan3_EC) (1 Peptidoglycan4_EC) (1 Peptidoglycan5_EC) (2 PGI) (2 PTA) (1 Undecapr)	16 ATP + 2 Acetate + 2 Ala + Asp + 2 Glc_X + 2 Gln + 5 Gly + Lys + NADPH + Undecaprenol + aKG = 11 ADP + 5 AMP + CO2 + 2 Glu + NADP+ + 8 P + 7 PP + Peptidoglycan	false	15	1.13726828644325	1.84668	1.69418	1.77537	1.62379	1.48969	1.56108
84	(2 AckA) (1 AlaRacemase) (1 D-alaDimer) (2 GlcPTS) (1 GluRacemase) (-3 GOT) (3 PEPCK) (2 Peptidoglycan1_EC) (1 Peptidoglycan2_EC) (1 Peptidoglycan3_EC) (1 Peptidoglycan4_EC) (1 Peptidoglycan5_EC) (2 PGI) (2 PTA) (1 Undecapr)	16 ATP + 2 Acetate + 2 Ala + 3 Asp + 2 Glc_X + 2 Gln + 5 Gly + Lys + NADPH + Undecaprenol + 3 aKG = 11 ADP + 5 AMP + 3 CO2 + 4 Glu + NADP+ + 8 P + 7 PP + Peptidoglycan + 2 Pyr	false	15	2.56409983586783	2.96939	2.67349	2.94631	1.15806	1.04266	1.14906
85	(2 AckA) (1 AlaRacemase) (1 D-alaDimer) (-4 ENO) (2 FBP) (-2 FBPALD) (-4 GAPDH) (1 GluRacemase) (-5 GOT) (5 PEPCK) (2 Peptidoglycan1_EC) (1 Peptidoglycan2_EC) (1 Peptidoglycan3_EC) (1 Peptidoglycan4_EC) (1 Peptidoglycan5_EC) (-4 PGK) (-4 PGM) (2 PTA) (-2 TPI) (1 Undecapr)	22 ATP + 2 Acetate + 2 Ala + 5 Asp + 2 Gln + 5 Gly + 4 H+ + Lys + 4 NADH + NADPH + Undecaprenol + 5 aKG = 17 ADP + 5 AMP + 5 CO2 + 6 Glu + 4 NAD+ + NADP+ + 14 P + 7 PP + Peptidoglycan	false	20	1.6355523692414	0.57015	0.906104	0.641737	0.348598	0.554005	0.392367
86	(-8 AckA) (1 ACS3) (11 ATPS) (4 CytochromeCO) (1 FA_betaOx) (-8 PTA) (7 QCytoOR)	19 ADP + 2 CytCred + Hexadecanoate + 7 NAD+ + 8 O + 19 P = AMP + 18 ATP + 8 Acetate + 2 CytCox + 5 H+ + 7 NADH + PP	false	7	0.413530051794379	0	0.448351	0.419092	0	1.0842	1.01345
87	(-8 AckA) (1 ACS3) (1 FA_betaOx) (-7 GOT) (7 Mae) (-7 Mqo) (-8 PTA)	8 ADP + 7 Asp + Hexadecanoate + 7 NAD+ + 7 NADP+ + 8 P + 7 aKG = AMP + 7 ATP + 8 Acetate + 7 CO2 + 7 Glu + 14 H+ + 7 NADH + 7 NADPH + PP + 7 Pyr	false	7	2.36428248521206	1.95243	2.26963	2.30845	0.825804	0.959965	0.976387
