# Supplementary material for: Staphylococcus aureus Transcriptome Data and Metabolic Modelling Investigate the Interplay of Ser/Thr Kinase PknB, Its Phosphatase Stp, the glmR/yvcK Regulon and the cdaA Operon for Metabolic Adaptation
Source: Microorganisms. 2021 Oct 14;9(10):2148. doi: 10.3390/microorganisms9102148 (PMC8537086; doi:10.3390/microorganisms9102148)
Supplement: Supplementary file 1 [file microorganisms-09-02148-s001.zip › suppl4_TableS4_NewHG_raw_data_GenExpr.xlsx]

## Sheet: Sheet3
Table S4. NewHG gene expression raw data
In Newman	Description	WT-1	WT-2	WT-3	STP-1	STP-2	STP-3	PKNB-1	PKNB-2	PKNB-3	STP-PKNB-1	STP-PKNB-2	STP-PKNB-3	COG
NWMN_0001	chromosomal replication initiation protein	21703	23701.5	7790.5	12182	17748	8649	11916	7578.1	7723	8626.65	16605	6831	L
NWMN_0002	DNA polymerase III subunit beta	10507	17369	5589	6970	12529	6004	8860	9196	5411	11269	11861	4104	L
NWMN_0003	recombination protein F	17646	15862	7269	10516	16751	7719	10036	9691	7284	10983	11928	6885	L
NWMN_0004	DNA gyrase B subunit	16268	15417.5	4509.5	9621	14001.5	7153	10411.5	6341	5682	7296.5	11052.5	5581.5	L
NWMN_0005	DNA gyrase A subunit	3542.67	4470.67	1736	2262.33	4336.33	2162	3040.33	1871.33	1527	2903.33	3547	1661.67	L
NWMN_0006	hypothetical protein	378.1	238.3	124.8	247.7	298.8	209.2	236.8	172.2	147.7	538.5	209.3	162.9	G
NWMN_0007	histidine ammonia-lyase	776.2	698.9	227.4	2330	975.6	336.6	1723	56.02	243.5	27.2	430.9	221.3	E
NWMN_0008	seryl-tRNA synthetase	1049	1111	906.7	593.8	806.3	1621	1248	560.4	1213	970.5	790.9	911.6	J
NWMN_0009	hypothetical protein	3285	2824	1430	1796	3149	1613	1768	1905	1097	2471	2354	804	E
NWMN_0010	hypothetical protein	3312	3387	2128	2213	3570	2412	2313	2336	2062	3122	2967	1393	S
NWMN_0011	homoserine O-acetyltransferase	2776	3742	1763	1521.5	2883.5	1545.5	2092	2379	1917.5	2623	3319	1875	E
NWMN_0012	hypothetical protein	10185	12800	4546	7886	10694	6339	7397	7931	5324	10317	10600	5223	S
NWMN_0013	hypothetical protein	10533.5	13080.3	5217.18	8486.64	12250.4	7778.55	7824.82	8752.45	5978.36	10362.2	11452.1	6246	T
NWMN_0014	50S ribosomal protein L9	19867	20643	11220	13050	20694	12377	14236	13139	10014	17536	18339	11274	J
NWMN_0015	replicative DNA helicase	9075	9825	4828	5359	10541	6568	6673	5815	4496	7291	6769	4147	L
NWMN_0016	adenylosuccinate synthetase	129.526	129.343	74.2743	135.631	186.994	97.7171	116.186	82.92	85.9943	106.211	101.62	55.1471	F
NWMN_0017	two-component response regulator	13335	14972.7	5132.33	11669	18550.7	8309.33	11406.3	11596.3	5896	12411.3	12254.3	5300.67	T
NWMN_0018	sensory box histidine kinase VicK	14851	17515	8103	13616	19767	13315	12198	12916	8852	15255	15943	9144	T
NWMN_0019	hypothetical protein	5347	7020	3686	4691	7449	5868	5277	5239	5202	6027	6573	4188	S
NWMN_0020	hypothetical protein	6741	9504	5135	6396	10016	7260	7297	7320	6790	8690	9095	5670	S
NWMN_0021	metallo-beta-lactamase super	469.2	816.8	223.6	637.3	678.5	238.3	525.8	419.9	244.6	604.6	467.6	146.3	R
NWMN_0022	5'-nucleotidase	1923	2501	1160	1124	1882	752.5	1566	1509	849.9	2320	2219	778.8	F
NWMN_0023	cassette chromosome attachment site ORF	1840	2874	774.5	1156	2016	650.3	1961	1503	722.5	1899	1692	628.2	S
NWMN_0024	hypothetical protein	5520	8537	2328	3534	4935	1286	4008	3474	1728	4463	4948	1130
NWMN_0026	hypothetical protein	1659	1888	821.9	1195	1273	852.8	1166	981.6	758.9	1805	1390	759.5	R
NWMN_0027	hypothetical protein	223.2	166	102.6	139.4	173.9	112.6	179.5	154.8	89.63	185	144.9	111.5	O
NWMN_0028	metallo-beta-lactamase super	700.4	445.8	333.4	534.3	541.5	563.6	620.1	527.7	350.9	504.8	409.3	412.8	R
NWMN_0029	hypothetical protein	10996	4102	3917	3977	3925	5786	9769	3836	4000	3480	2784	3466	R
NWMN_0030	hypothetical protein	2260.6	1232.52	1831.8	1335.92	1202.4	2683	1814.4	834.36	2266.6	1103.4	941.4	2244	J
NWMN_0031	hypothetical protein	1140	1176	814.1	922.6	923.3	531.2	977.6	951.6	628.5	1044	857.2	639.3	K
NWMN_0032	hypothetical protein	534.433	509.4	412.8	337.733	430.633	437.933	354.333	362.167	389.667	540.967	379.767	271.633	G
NWMN_0033	hypothetical protein	395.1	581.2	329.9	158.9	306	260.1	195.8	359.9	282.6	407	429.9	319.2
NWMN_0034	hypothetical protein	317.3	347.5	137	153.6	220.5	196.5	151.1	210.6	213.3	254.8	230.5	208	R
NWMN_0035	LysR family regulatory protein	1684	2684	635.9	1344	1670	518.7	1091	1245	591.1	1621	1538	502.2	K
NWMN_0036	hypothetical protein	258.133	141	63.5433	90.07	87.5867	129.223	123.49	57.0633	112.577	74.3	77.74	75.3767
NWMN_0037	hypothetical protein	675.1	837.7	72.53	639.7	646.4	220.2	567.6	268.6	194.7	519.1	490.5	150	K
NWMN_0038	hypothetical protein	834.75	1047.5	455.25	842.7	919.2	451.5	766	564.9	369.3	851.3	710.75	373.1
NWMN_0039	hypothetical protein	5532	5824	3059	3766	4729	3289	3171	1013	2385	2474	3899	2301	L
NWMN_0040	hypothetical protein	1280	1248	826.9	859.9	1073	1040	1099	855.7	956.3	1569	1204	918.9
NWMN_0041	1-phosphatidylinositol phosphodiesterase	4362	5002	4615	1106	976.9	1339	5561	3251	5982	7120	8642	7947
NWMN_0042	hypothetical protein	197.1	269.5	163.3	681.3	2.43	138.9	156.3	177.4	137.3	177.7	186	114.8
NWMN_0043	hypothetical protein	273.8	346.6	111.8	184.5	255.3	179.2	167.1	136.2	116.2	165	157.4	121.7
NWMN_0044	hypothetical protein	603.2	496.5	299.4	426.7	572.8	456.5	405.2	356.9	316	427.2	383.1	270.3
NWMN_0045	hypothetical protein	795.8	633.1	386.4	561.1	706.9	596.2	569.6	404	363	531.9	476.7	342.9
NWMN_0046	AraC family transcription regulator	4918.43	6382.43	2357.86	3901.43	5554.14	3048.57	3140.14	3117.86	1918.14	4030	3781.71	1623.43	K
NWMN_0047	M20/M25/M40 family peptidase	29788	15151	16604	13723	15171	27725	16152	12853	15598	13004	11600	21246	R
NWMN_0048	drug transporter	14692.4	8964.14	8091.29	7600.43	8488.14	13701.7	9861	7365	7551.86	8298.86	7049.14	10180.7	G
NWMN_0049	Na/Pi cotransporter	1371	1278	746.7	1524	3109	2637	584.3	691.7	508.2	605.3	572.1	300.8	P
NWMN_0050	67 kDa Myosin-crossreactive streptococcal antigen-like protein	204.3	115.4	104.5	182.8	174	267.2	172.2	88.52	98.19	130.7	78.07	106.1	S
NWMN_0051	integral membrane domain-containing protein	154	202	63.19	107.6	175.5	119.1	244.2	104.2	67.77	109.9	144.6	72.13	G
NWMN_0052	transcriptional regulator GntR	381	565.9	119.69	356.15	281.7	137.91	465	195.7	160.6	425.55	268.25	101.96	K
NWMN_0053	hypothetical protein	11951	4672	8473	3234	3740	8823	9561	3998	10171	4410	4747	8912	R
NWMN_0054	L-lactate permease	24256	17370	14423	13729	14153	13309	28715	10591	12716	14530	12983	12650	C
NWMN_0055	protein A	30544	35261	32875	36780	23152	18986	37901	5422	5390	31327	10841	4352	M
NWMN_0056	staphylococcal accessory regulator S	5361	5736	2446	3180	3165	1334	5931	2319	2295	5655	2819	1555	K
NWMN_0057	lipoprotein SirC	250.7	420.6	160.2	164.2	275.5	148.4	185	187.6	132.9	223.2	234.4	131.8	P
NWMN_0058	lipoprotein SirB	264.9	396	161.2	173.5	236.5	120.9	264.6	195.6	142.2	227.1	225.4	146.1	P
NWMN_0059	Iron-regulated ABC transporter siderophore-binding protein	312.4	589.6	129.8	222	245.6	97.52	414.7	193.1	113.5	283.4	265.6	80.58	P
NWMN_0060	O-Acetyl serine sulfhydrylase	133.715	103.685	78.885	59.665	80.595	86.835	107.66	68.425	66.645	63.34	89.21	78.545	E
NWMN_0061	ornithine cyclodeaminase	318.7	171.5	191	86.99	142.7	180	235.7	106.9	105.9	122.6	150.2	159.4	E
NWMN_0062	siderophore biosynthesis IucC	141.1	94.49	71.63	74.43	100.8	101.3	102.2	97.75	80.84	107.2	116	123.6	Q
NWMN_0063	membrane transporter protein	153.1	211.2	96.98	116.2	120.1	103.1	91.74	123.1	65.99	139.8	124.1	135	G
NWMN_0064	siderophore biosynthesis IucA	278	343.1	156	151.4	186	254.9	152.6	180.6	128.5	210.1	202.7	187.2	Q
NWMN_0065	siderophore biosynthesis IucC	373.414	276.143	113.269	195.714	268.529	229.929	178.571	152.086	141.657	199.071	222.414	170.814	Q
NWMN_0066	2-dehydro-3-deoxyglucarate aldolase	437.2	499.9	260.3	313.4	388.9	455.9	383.9	323.9	282	417.1	378.6	395.8	G
NWMN_0067	diaminopimelate decarboxylase	617.4	483.8	304.1	361.1	491	560.8	347.2	369.9	305	531.2	454.2	372.8	E
NWMN_0068	hypothetical protein	299.171	263.043	159	235.029	277.686	228.057	295.343	226.6	182.8	298.471	245.729	162.057	K
NWMN_0069	hypothetical protein	242.3	594.3	185.5	486.5	485.7	197.1	356.3	445.3	297.5	416.4	399.6	158
NWMN_0070	hypothetical protein	2041	1475.5	818.1	1124	1255	658.45	1381.5	875.85	725.7	909.45	916.2	388.6
NWMN_0071	acetoin reductase	9111.57	11958.4	7981.71	5745.14	8413.43	8391.43	7177.71	6271.71	6418.29	3960.97	9561.57	7953.57	I
NWMN_0072	NAD dependent epimerase/dehydratase	252.1	262.3	92.07	87.84	102.8	49.44	165.1	132.1	103.4	256.5	166.9	98.13	M
NWMN_0073	capsular polysaccharide biosynthesis glycosyltransferase	183.2	207.2	92.92	72.94	83.49	44.58	85.25	102.8	68.75	172.1	112.8	75.94	M
NWMN_0074	glycosyl transferase group 1	177.75	152.7	90.57	77.815	46.75	68.095	122.8	93.145	92.555	125.7	103.355	74.905	M
NWMN_0075	hypothetical protein	143.571	138.457	49.5429	77.8029	99.44	43.6857	130.557	65.0557	53.5686	98.9186	86.5171	38.1386	M
NWMN_0076	polysaccharide extrusion protein	851.329	524.643	269.257	567.129	537.814	663.4	665.429	280.291	379.8	470.014	406.357	496.886	R
NWMN_0077	superoxide dismutase	5112	10243	2341	4742	5734	1459	5294	4377	1881	6306	5851	1186	P
NWMN_0078	cell wall surface anchor	15602	16996	12494	3613	5155	4414	20854	11120	13013	25181	22144	17599	O
NWMN_0079	GntR family transcriptional regulator	1566	1745	662.8	1329	1752	886	1486	1082	711.2	1522	1184	692.9	K
NWMN_0080	purine nucleoside phosphorylase	552.8	376.2	96.42	399.2	385.1	303.4	380.4	114.4	184.7	352.9	426.2	376.4	F
NWMN_0081	tetracycline resistance protein	829.4	581.1	385.5	647.9	832.6	655.4	641.2	501.6	411	657.3	631.8	566.6	G
NWMN_0083	phosphopentomutase	10049	9481	3353	5321	8167	6509	6135	426.3	4431	4209	7062	6319	G
NWMN_0084	phosphonates ABC transporter permease protein CC0363	178.1	196.5	132.9	89.79	141.9	112.5	184.1	170.7	127.1	193.7	213.7	128.5	P
NWMN_0085	phosphonates ABC transporter permease	456.8	2308	207	193.5	302.4	174	456.8	335	204.7	394.8	417.5	240.4	P
NWMN_0086	amino acid ABC transporter ATP-binding protein	331.9	457.3	214.5	143	222.7	140.7	243	284	233.4	365.5	389.6	210.8	P
NWMN_0087	hypothetical protein	487.8	401.4	250.8	199.4	274.5	300.1	250.6	281.9	222.6	280.7	247.3	260.4
NWMN_0088	5' nucleotidase	796.2	998	641.4	648.3	786.8	575.1	674.9	504.2	595.6	640.2	843	652.5	F
NWMN_0090	hypothetical protein	131.5	236	77.665	118.4	137.25	93.08	113.88	123.45	104.6	143.75	129.2	84.645
NWMN_0091	replication initiation protein	220.1	248	106.9	188.8	202.4	114.5	207.8	142.9	116.1	136	240.5	92.65
NWMN_0092	hypothetical protein	604.7	882.7	246.3	433.7	784.4	514.6	415.4	379.1	290.7	467.4	437.1	243.6
NWMN_0094	bifunctional acetaldehyde-CoA/alcohol dehydrogenase	2816	1482	2874	2156	2742	5202	2065	1884	3136	2007	2037	4120	C
NWMN_0095	capsular polysaccharide biosynthesis protein CapA	20578.9	23771.4	14355.6	18852	28599.6	57588.4	21452.4	20517.1	24517.7	6248.71	14538.9	27960.9	M
NWMN_0096	capsular polysaccharide biosynthesis protein CapB	30084	39924	37511	31004	48587	65181	35961	43479	44841	20387	27381	51177	D
NWMN_0097	capsular polysaccharide biosynthesis protein CapC	18587.3	31567.6	22279.9	25483.7	34785.3	48381.4	24998.1	30855.1	24419	16758.9	20776.4	27015.3	G
NWMN_0098	capsular polysaccharide biosynthesis protein CapD	14258	30682	15634	25984	34081	51451	16710	29596	16522	16345	17323	22429	M
NWMN_0099	capsular polysaccharide biosynthesis protein CapE	7079.71	23371.4	5186.71	15376.9	20417.9	20668.9	7292.43	10927.1	8635.29	7381.29	10039.7	9559.86	M
NWMN_0100	capsular polysaccharide biosynthesis protein CapF	10028	31757.1	8147	20220.6	28173.6	24078	8509.86	26352.9	10032.1	14398.4	14935.9	12206.9	M
NWMN_0101	capsular polysaccharide biosynthesis protein CapG	7038.86	21013.6	5788.29	11562.7	22571.1	15760.7	6911	22932.3	7557.57	10366.9	11345.3	8820	M
NWMN_0102	capsular polysaccharide biosynthesis protein CapH	9721	22915	6855	11315	22480	19244	7797	23415	9533	9880	14474	11423	R
NWMN_0103	capsular polysaccharide biosynthesis protein CapI	4723	10290	3671	5311	11481	9823	4050	12829	4877	4944	6857	5871	M
NWMN_0104	capsular polysaccharide biosynthesis protein CapJ	5045	9139	3326	5171	12223	8300	4183	9517	4408	3817	7484	4602
NWMN_0105	capsular polysaccharide biosynthesis protein CapK	7023	9433	4130	6959	13723	9684	4751	9882	4889	4092	9095	4977
NWMN_0106	capsular polysaccharide biosynthesis protein CapL	4579	4947	2665	4025	10498	6933	2808	6373	3537	2904	5938	3939	M
NWMN_0107	capsular polysaccharide biosynthesis protein CapM	7636	7752	4068	6885	15745	10887	4456	9130	5693	4728	8706	6128	M
NWMN_0108	capsular polysaccharide biosynthesis protein CapN	5748.43	6474.71	3172.29	5299.14	11351.3	8436	3323	6581	3847.86	3772.71	8149.86	4113.29	M
NWMN_0109	capsular polysaccharide biosynthesis protein CapO	5993	6818	3317	5414	14532	8686	3666	6592	3868	3918	7521	4049	M
NWMN_0110	capsular polysaccharide biosynthesis protein CapP	3864	4502	2153	4025	8486	4743	2277	4095	2678	2985	5129	2509	M
NWMN_0111	heme-degrading monooxygenase IsdI	71.78	118.4	36.43	55.72	126.9	89.57	56.87	62.84	41.9	63.54	75.64	29.99	R
NWMN_0112	hypothetical protein	330.6	574.5	243.3	257.5	345.6	207.7	550.8	274.9	214.9	448.7	363.6	173.6	S
NWMN_0113	aldehyde dehydrogenase	17684	35814	5424	19500	33142	6417	12837	20603	5075	16629	22173	3947	C
NWMN_0114	cation efflux	1771	976.2	1915	735.9	863.4	2210	1913	710.9	2398	833.8	705.4	1951	P
NWMN_0115	hypothetical protein	272.3	307.5	68.79	158.3	154.6	158.9	822.2	49.36	144.4	8.913	90.42	153.1
NWMN_0116	hypothetical protein	31.68	13.96	12.83	15.6	14.51	23.61	38.63	22.83	19.94	20.86	20.35	20.58	P
NWMN_0117	hypothetical protein	151.3	114.8	67.27	108.8	131.4	97.39	147.7	270	77.07	127.4	108.5	116.6	P
NWMN_0118	ABC transporter permease protein	254.2	230.6	126	209.3	226.9	208.4	257	166.9	148.8	218.7	213.6	166.8	P
NWMN_0119	hypothetical protein	1097	476	545	486.4	434.7	838.6	992.9	391.4	447.4	664.8	364.6	570.3	I
NWMN_0120	hypothetical protein	2164.67	3227.67	1017.07	1536	2110.67	1224	2945.33	1840.67	1132.33	2463	1694	885.233	S
NWMN_0121	formate dehydrogenase	124.85	265.9	101.84	110.15	182.3	151.5	82.975	75.655	137	196.95	139.55	104	C
NWMN_0122	drug transporter	3051	4209	1745	1966	2187	1611	2767	2331	1757	4219	3220	1683	G
NWMN_0123	gramicidin S synthetase 2 related protein	4553	3658	2594	2042	2772	2897	3865	2843	3277	4295	4244	4259	Q
NWMN_0124	4'-phosphopantetheinyl transferase super	4064	2751	2731	1653	2020	2803	4542	2450	3142	3966	3065	3443	H
NWMN_0125	hypothetical protein	1973	2009	1593	1806	2428	1744	2289	1768	1741	1811	1890	1392	S
NWMN_0126	acetylglutamate kinase	480.5	559.1	359.8	276.5	537.7	397.9	363.7	390.8	354.6	380.9	471.9	361.2	E
NWMN_0127	bifunctional ornithine acetyltransferase/N-acetylglutamate synthase protein	470.9	632	321.3	255.6	533.6	355.7	329.5	337.8	385	356.5	485.7	319.6	E
NWMN_0128	N-acetyl-gamma-glutamyl-phosphate reductase	408.1	563.3	219.1	174.8	411	217.3	176.1	268.2	194	258.1	389.3	172.4	E
NWMN_0129	ornithine aminotransferase	468.15	619.15	289.1	245.1	469.6	262.7	195.3	332.45	249.95	307.9	433.95	203.2	E
NWMN_0130	branched-chain amino acid transport system II carrier protein	3925.57	5091.71	1570.57	2872.29	3252.43	1097.29	3134.57	2254.29	1099.69	3866.14	2721.86	945.857	E
NWMN_0131	isochorismatase	1081.85	1361.5	659.15	744.35	1032.05	684.6	890.5	876.75	601	1173.5	928.25	466.95	Q
NWMN_0132	indolepyruvate decarboxylase	4463	7154	1780	3904	5579	1893	3084	4107	1372	5200	4892	1386	G
NWMN_0133	PTS enzyme II glucose-specific factor IIABC component	5593.57	6824.14	3682.43	4548.57	6704.14	4603.86	3965.14	4312.86	3165.14	4624.29	5175.29	2892.57	G
NWMN_0134	hypothetical protein	48835	37373	30971	20356	24519	24158	38319	32270	30347	40868	39961	34704	S
NWMN_0135	N-acetylmuramic acid-6-phosphate etherase	30537	27457.5	17323	12905	13538	12942	24330.5	18046.5	16184.5	26216	27232	22549.5	R
NWMN_0136	PTS system sucrose specific IIBC component	55427	49561	10131	21125	18586	17868	37460	357.8	26160	19922	42372	35324	G
NWMN_0137	RpiR family phosphosugar-binding transcriptional regulator	13922	12158	9046.33	6170	6445	5710.67	15108.3	9087.33	8797	13129.7	12947	10937	K
NWMN_0138	hypothetical protein	826.7	928.4	432.7	521.1	604.9	394.9	852.9	562.9	511.6	709.9	696.1	336
NWMN_0139	HsdR family type I site-specific deoxyribonuclease	5224	5305	3147	2923	4341	1557	4815	3761	2804	5115	4902	2368	V
NWMN_0140	hypothetical protein	6094	8531	4178	4967	5966	3997	5632	4523	3959	7301	5580	3124
NWMN_0141	hypothetical protein	4943	6660	3021	3423	4381	2756	3652	3198	2854	5575	3517	2344
NWMN_0142	hypothetical protein	5616	7290	4159	3534	5367	3373	5349	4351	4392	6166	4160	2942
NWMN_0143	peptide ABC transporter ATP-binding protein	900.9	745.3	429.6	513.1	811.6	554.5	588.7	485.5	315.2	415.6	656.5	390.4	R
NWMN_0144	oligopeptide ABC transporter permease protein	91.35	167.7	15.42	71.51	87.4	28.78	78.81	50.85	18.09	57.4	80.37	15.94	E
NWMN_0145	peptide ABC transporter permease protein	204.3	232.8	103.1	144.6	192.6	95.65	220.7	157.7	111.3	175.7	221.8	85.75	E
NWMN_0146	RGD-containing lipoprotein	411.1	403.2	252.8	274.3	364.6	221	390.8	271.5	236.8	264.6	358.9	219.8	E
NWMN_0147	gamma-glutamyltranspeptidase	365.9	460.8	167.4	196.8	280.8	208.2	375.8	191.3	162.2	221.6	247.3	153.1	E
NWMN_0148	hypothetical protein	440.76	764.9	227.72	379.78	576.08	245.98	493.7	491.16	253.38	398.62	456.6	5541.68
NWMN_0149	FMN-dependent NADH-azoreductase	682.8	1021	359.2	557.5	815.4	320.3	746.5	500.3	314.5	659.9	592.6	284.7	I
NWMN_0150	M23/M37 peptidase domain-containing protein	642.171	1271.74	366	775.614	1278.1	591.271	348.929	579.114	295.057	529.214	625.271	237.829	M
NWMN_0151	multiple sugar-binding transport ATP-binding protein	388.3	489.6	111.7	340.3	388.1	86.12	248.5	317.5	83.25	356.4	324.8	102.2	G
NWMN_0152	maltose ABC transporter, maltose-binding protein	539.3	742.3	230.9	503.5	660.2	154.3	365.5	369.1	169.7	488.2	532	166.3	G
NWMN_0153	maltose ABC transporter permease protein	1777	1291.95	1018.45	918.1	1371	1166.5	1191.4	867.85	920.1	1130.2	1273.5	995.5	G
NWMN_0154	maltose ABC transporter permease protein	1425	882.314	776.357	669.814	1116.8	1085.66	1040.66	681.171	753.086	812.314	996.771	797.657	G
NWMN_0155	hypothetical protein	2047	1709	1450	1323	1834	1880	1826	1487	1200	1556	1754	1435	R
NWMN_0156	xylose phosphate isomerases	903.467	690.333	696.767	619.6	589.2	614.9	1085.67	455.7	658.967	770.133	808.167	694.267	G
NWMN_0157	hypothetical protein	150.4	80.5	52.1	124.4	93.22	77.02	141.9	63.12	81.52	150.9	93.13	81.52	S
NWMN_0158	sugar phosphate antiporter	352.26	329.74	152.52	299.72	274.58	152.84	324.86	152.16	147.04	273.48	223.36	140.08	G
NWMN_0159	AraC family DNA-binding response regulator	1003.43	980.433	588.667	607.267	791.8	491.567	870.867	514.53	533.2	674.67	779.867	506.933	T
NWMN_0160	sensor histidine kinase	1207	1154	619	687.4	978.1	701.1	737.7	564.9	507.9	846.1	839.2	469.1	T
NWMN_0161	lipoprotein	1398	1476	528.5	798.1	1276	617.9	793.3	841.1	440	1084	1022	320.6	P
NWMN_0162	formate acetyltransferase	65177	21000	48036	58719	31732	65149	64640	19012	26291	39094	21513	45629	C
NWMN_0163	pyruvate formate-lyase 1 activating enzyme	65177	16392	43343	40154	32129	61895	65161	17910	27708	35678	17880	37585	O
NWMN_0164	hypothetical protein	1558	1483	553.9	1436	1254	426.5	1350	796.2	340	1203	946.6	233.6	C
NWMN_0165	hypothetical protein	94.0857	73.2471	22.777	68.6457	48.2471	35.8614	112.63	50.4514	49.6663	162.583	74.4486	40.3243
NWMN_0166	staphylocoagulase	68.55	60.25	32.31	63.65	70.91	59.53	35.31	47.51	50.08	77.87	63.39	45.52
NWMN_0167	acetyl-CoA acetyltransferase	2766	6588	4086	1737	7773	4306	1653	5128	3290	1994	5623	3260	I
NWMN_0168	3-hydroxyacyl-CoA dehydrogenase FadB-like protein	3177.14	5731	2734	1370	5454.57	3982.71	991.286	3222.29	2567.71	1711.29	4780.14	2872.57	I
NWMN_0169	glutaryl-CoA dehydrogenase FadD-like protein	6805	11692	4994	2375	11605	6458	1694	5895	4295	2900	10062	4413	I
NWMN_0170	acyl-CoA synthetase FadE-like protein	6016	13683	4988	2930	13167	6773	1798	2875	4697	1075	11026	4673	I
NWMN_0171	acetyl-CoA/acetoacetyl-CoA transferase	7487	20469	5933	4225	19844	7838	2001	9473	4757	4857	14315	4832	I
NWMN_0172	hypothetical protein	783	1172	433.967	648.7	804.467	310.447	727.333	618.2	402.133	1083.87	887.4	369.2	S
NWMN_0173	ABC transporter substrate-binding protein	128.95	90.37	57.28	79.39	88.85	92.46	147.35	81.565	68.31	89.65	80.11	60.19	E
NWMN_0174	hypothetical protein	417.5	365	261.3	355.4	320.7	346.2	650	243.3	214.3	439.9	211.2	194.5	S
NWMN_0175	globin domain-containing protein	896.1	737.1	551.8	899	1096	911.1	1104	567.9	480.1	658.6	470.7	343.5	C
NWMN_0176	L-lactate dehydrogenase	42263	18833	32889	38024	43973	53618	37605	23120	32076	43408	22666	32396	C
NWMN_0177	PTS system glucose-specific IIBC component	712.8	476.4	396.4	522.3	702.2	723.5	546.8	345.8	326.4	624	392.6	392.5	G
NWMN_0178	inosine-uridine preferring nucleoside hydrolase	709.4	810.4	335.9	496.4	761.3	274.7	614	524	270.5	548.2	584.7	270	F
NWMN_0179	transcriptional antiterminator BglG	101.5	195	51.62	78.38	79.96	76.2	49.63	58.19	46.32	62.96	72.09	40.4	G
NWMN_0180	phosphoenolpyruvate-dependent sugar phosphotransferase system EIIA 2	93.32	68.71	40.24	85.55	93.18	50.28	64.23	59	60.66	70.54	73.22	48.52	G
NWMN_0181	PTS system component	129.7	100.2	62.78	113.3	104.8	81.03	73.37	91.01	64.07	80.57	85.51	86.55	G
NWMN_0182	PTS system component	121.5	114.4	99.28	153.2	145.2	148	109.7	217.6	85.96	114.7	117.5	96.84	G
NWMN_0183	sorbitol dehydrogenase	309.771	651.771	145.3	269.829	334.571	228.871	210.386	210.743	133.6	217.529	227.5	157.386	E
NWMN_0184	hexitol dehydrogenase	362.6	344.2	161.9	302.2	395.2	222.8	201	217.2	146.2	240.1	266.9	117.2	E
NWMN_0185	2-C-methyl-D-erythritol 4-phosphate cytidylyltransferase	9201	12857	4304	8376	10685	4073	6655	6893	3683	9291	9393	3568	I
NWMN_0186	zinc-containing alcohol dehydrogenase	9148	12534	4344	7055	10076	4423	7499	6265	3765	8889	8227	3452	E
NWMN_0187	tagB protein	6986	8155	2675	4533	6488	2546	4623	4264	2584	6367	5460	2079	M
NWMN_0188	teichoic acid biosynthesis protein F	1245	1470	403.1	1308	1799	562.1	896.3	675.6	294.1	536	858.5	262.5	M
NWMN_0189	2-C-methyl-D-erythritol 4-phosphate cytidylyltransferase	6877.2	9866.4	3011.8	6616.8	8636.6	3468.2	5137.2	5148.6	2733.4	7157	6392.2	2725.8	I
NWMN_0190	alcohol dehydrogenase zinc-containing	18223	24369	8993	15861	20499	12098	12148	12448	8668	18698	17823	9475	E
NWMN_0191	hypothetical protein	10350	12402	6632	8076	14104	8516	8041	9325	7219	10485	10109	5449	M
NWMN_0192	glycosyl transferase group 2	18160	19730	11496	11346	20569	14297	14043	13539	11613	15424	14091	7847	M
NWMN_0193	cell wall biosynthesis protein ScdA	2201	1154	1651	1573	1528	1718	2315	890	1521	1747	1129	1537	D
NWMN_0194	two-component sensor histidine kinase	4250.57	5688.86	2115.57	3125	3798.86	1631.86	3255	2955.57	1882.29	5239	3967	1360.07	T
NWMN_0195	two-component response regulator	460.4	889	187.9	316.5	422.2	86.39	388.4	396.3	182.2	624	529.7	105.8	K
NWMN_0196	murein hydrolase regulator LrgA	2821.71	1373.14	1772.29	1567.57	1727.29	1807.86	1924.57	592.1	1309.71	1872.71	712.314	1204.71	R
NWMN_0197	antiholin-like protein LrgB	662.5	365.2	452.8	312.4	522.8	436.4	685	199.8	290.9	409.9	181.5	250.8	M
NWMN_0198	transcriptional regulator GntR	844.75	1606.85	629.4	762.95	1173.25	519.95	956.5	1005.75	628.2	1345.75	1307.8	485.7	K
NWMN_0199	PTS system beta glucosides specific IIAB component	1503	1637	597.1	880.5	1420	395.3	576.2	755.6	248.1	716.5	1041	238.7	G
NWMN_0200	6-phospho-beta-glucosidase	820.9	1322	451.1	635	1078	515.8	898.3	818.4	403.5	618.3	1005	396.1	G
NWMN_0201	hypothetical protein	210	342.04	114.8	154.8	230.5	90.468	249.18	277.98	90.93	203.38	237.66	82.562	Q
NWMN_0202	ribokinase	1818.29	2136	1153.14	1253.86	1683.86	1440.71	1558.14	1499.43	1472.14	1973.57	2340.86	1785.71	G
NWMN_0203	D-ribose pyranase	3168	3150	636.4	1945	2884	2259	1792	174.8	1560	964.9	2784	2386	G
NWMN_0204	ribose transporter RbsU	1495	1490	769.1	929	1313	1202	1014	1054	965.4	1407	1713	1270	G
NWMN_0205	ribose transcriptional repressor RbsR	2434	1221	1514	772.5	1297	1220	1993	1020	1502	912.4	911.1	1106	K
NWMN_0208	drug transporter	158.5	166.5	84.43	131.5	158.8	91.99	90.1	101.4	98.7	130	144.9	97.95	G
NWMN_0209	choloylglycine hydrolase	1134	1165	522.6	684.5	1131	915.3	513	721.6	495.4	808.8	831.1	486.8	M
NWMN_0210	peptidoglycan hydrolase	390.7	590.5	240.3	474.2	932.8	430.8	229.7	297	231.1	334.3	390.1	209.7	M
NWMN_0211	ABC transporter ATP-binding protein	393	178.143	199.1	167.143	170.514	249.143	393.929	163.786	149.3	400.671	168.214	187.5	V
NWMN_0212	hypothetical protein	673.5	325.7	318.5	337	309	397.7	622.8	242	233.7	336.3	271.8	276.2	V
NWMN_0213	hypothetical protein	276.4	111.1	81.63	96.34	91.51	91.24	195.9	52.25	61.61	80.97	81.7	134.6
NWMN_0215	hypothetical protein	103.2	150.5	57.81	71.67	93.24	44.61	60.63	66.7	49.1	82.3	74.03	32.58
NWMN_0216	hypothetical protein	478.4	479.8	235.9	386.5	386.3	194.3	338.5	323.9	189	396.4	409.8	165.2
NWMN_0217	hypothetical protein	80.31	94.03	18.27	68.95	71.58	42.82	31.88	0.756	38.94	44.58	62.59	35.32
NWMN_0218	secretory antigen SsaA-like protein	1071	2371	625.3	1129	1923	469.9	1038	1367	637.5	1288	1294	417	R
NWMN_0219	hypothetical protein	15814	26653	22495	19256	5490	18510	30370	27227	27464	21597	27767	18664	S
NWMN_0220	hypothetical protein	577.014	1531.14	187.043	501.357	781.914	237.014	687.271	664.129	306.543	545.157	856.157	21266.9	S
NWMN_0221	hypothetical protein	132.7	209	149.3	67.55	175.9	119.6	120.5	164.3	195.5	180.6	142.8	176.5
NWMN_0222	hypothetical protein	350.2	845.6	312.9	264.9	543.6	230.7	423.2	514.1	345.2	429.9	672.7	224.7	S
NWMN_0223	diarrheal toxin	1621	1752	1157	750.6	1567	924.3	1077	1058	1137	1007	1493	988.6	D
NWMN_0224	hypothetical protein	762.4	981.3	636.5	412	749.1	812	669.2	671.6	704.7	539.6	920.2	675.4
NWMN_0225	hypothetical protein	1009	1246	562	595.4	1098	872.1	1028	411.5	717.1	564	1220	780
NWMN_0226	hypothetical protein	1013	1288	835.2	591.2	1031	923.8	922.9	931.5	822	718.1	1139	810.1
NWMN_0227	hypothetical protein	970.2	1022	741.8	535.1	912.4	948.8	956.9	891.3	830.3	808	1128	843.8
NWMN_0228	hypothetical protein	5206	6104	2456	6533	7904	4509	4232	3910	2405	5168	5315	2216	S
NWMN_0230	hypothetical protein	281.8	338.6	129.2	233	318.4	171.6	259.6	186.7	144.3	254	210.4	93.9
NWMN_0231	hypothetical protein	270	408.2	120.3	306.1	315.7	152.3	226.3	219.9	136	291.5	223.8	63.74
NWMN_0233	hypothetical protein	1185	1675	569.5	622.1	1001	552.4	969.2	967.8	812.6	2354	1143	578.6
NWMN_0234	hypothetical protein	3555	4163	2125	1907	2460	1767	2960	2632	2139	2770	3374	1646
NWMN_0236	hypothetical protein	1632	1900	916.7	1089	1284	871.2	1387	1135	947	1367	1411	733.7
NWMN_0244	hypothetical protein	1661	1926	932.4	1047	1294	958.3	1264	1078	983.3	1218	1342	689.6
NWMN_0245	hypothetical protein	964.8	1277	456.9	590.9	800.2	339.2	1081	793.4	555.1	860.9	910.5	373.9
NWMN_0246	hypothetical protein	1180	1500	846.5	796.7	872.8	598.6	2065	1087	997.3	1369	1222	811.8
NWMN_0247	formate/nitrite transporter	2840	1815	3762	2577	2934	3652	2678	1867	3304	3271	2293	2636	P
NWMN_0248	branched-chain amino acid transport system II carrier protein	2490	2744	1852	1778	3037	2397	1753	1916	1765	2238	2632	1728	E
NWMN_0249	5'-nucleotidase	4666	7146	1359	3860	4123	426.6	7012	3203	1054	5486	5304	373	R
NWMN_0250	ABC transporter permease protein	8996	5101	5842	4303	4054	9447	10844	3933	5139	5854	3151	6015	V
NWMN_0251	ABC transporter ATP-binding protein	7545.5	5517.5	6063.5	4360.5	4071	8827	10581.5	3986.5	4384	6020	2951.5	5203.5	V
NWMN_0252	perfringolysin O regulator protein	19031	28642	7112	18415	21786	7421	10535	13668	4848	14218	19245	3856	G
NWMN_0253	PfkB family carbohydrate kinase	1176.17	823.233	488.433	1138.43	1027.33	1063.47	582.667	396.5	362.833	572.867	651.067	445.533	G
NWMN_0254	hypothetical protein	1787	1256	702.2	1720	1484	1582	916	505.3	589.8	1182	918	709.9	Q
NWMN_0255	pyrimidine nucleoside transporter	489.1	355.4	321.2	413.9	461	438.9	454	191.5	248.3	412.6	284.7	242	F
NWMN_0256	sodium:solute symporter	1663	1083	621.8	1300	1145	726.4	1139	719.9	549.1	1225	1175	645.8	E
NWMN_0257	N-acetylneuraminate lyase	2227.86	1736.86	848.443	2176.43	2011.29	885.514	1568.14	1180.14	851.457	2064.57	1744.29	787.357	E
NWMN_0258	ROK	6494	7668	2955	5503	8436	4022	3393	4413	2557	4562	5921	2105	K
NWMN_0259	hypothetical protein	3177	3924	1221	2616	3525	1821	1958	2077	1219	2736	2586	879.3	K
NWMN_0260	N-acetylmannosamine-6-phosphate 2-epimerase	5905	7087	3183	4309	6968	4164	3659	4606	3228	4837	5800	2695	G
NWMN_0261	hypothetical protein	1395	1436	728.3	1956	2121	1462	899.7	667.2	629.8	1160	894.9	458.4	S
NWMN_0262	lipase	5097.43	5418.86	2330.57	3098	4972.43	3243.57	2796.57	3430	2368.71	3474.29	4489.57	2894.71	R
NWMN_0263	integrase	2067	1506	1261	1339	1134	1228	1160	1436	1247	1638	1765	1433	L
NWMN_0265	hypothetical protein	4697	9987	2532	4678	5286	1453	4003	4268	1892	6618	5136	1110
NWMN_0266	hypothetical protein	3781	7352	1909	3566	4337	970.6	3452	3192	1340	4654	3908	853.3	K
NWMN_0267	hypothetical protein	915.4	1188	529	770.9	867	515.9	1136	842.5	545.1	1047	963.2	375
NWMN_0268	anti repressor	157.6	240	52.86	166	254.2	144.3	83.13	106.2	107.9	91.52	106.6	46.45	K
NWMN_0285	hypothetical protein	1217	1099	293.4	819	1025	871.6	1110	85.7	520	0.01	730.2	549.9
NWMN_0286	hypothetical protein	1254	940.1	665	640.4	872.6	999.4	1015	562.4	638.8	885.8	678.4	619.4
NWMN_0287	hypothetical protein	1122	736.3	681.7	724.5	857.9	877.7	1235	639.7	596	858.1	754.4	578.3
NWMN_0288	hypothetical protein	277.2	168.6	87.11	132.1	183.3	212	160.3	69.04	133.6	0.01	124	114
NWMN_0289	hypothetical protein	445.9	266	248.2	251.3	311	402	390	223.6	229.2	270.4	226.1	285.1	R
NWMN_0290	hypothetical protein	280	125.5	130.2	150.2	199.2	256.8	217.5	118.2	140.2	169.7	152.2	158.3
NWMN_0291	hypothetical protein	84.28	85.68	48.89	72.79	119.1	76	66.77	67	57.48	295	62.33	49.24
NWMN_0292	hypothetical protein	13.11	12.93	8.1	22.02	16.58	29.76	19.5	16.96	31.99	171.5	8.34	21.61
NWMN_0293	hypothetical protein	338.1	235.7	142.3	372.9	573.2	463.7	269.9	224	224.8	261.3	156.4	154.8
NWMN_0294	hypothetical protein	213.5	143	43.67	204.8	269.3	234.8	167.6	74.84	92.49	20.95	94.38	94.94
NWMN_0295	hypothetical protein	190.9	142	90.15	229.2	303	234.9	156.2	117.1	106.6	109.6	135.3	106.3
NWMN_0296	hypothetical protein	284.1	198.1	102.2	286.5	418	346.4	216.4	191.3	186.3	182.4	175.4	142.4
NWMN_0297	hypothetical protein	190.9	119.5	98.23	196.2	267.8	209.3	185.5	390.2	96.54	130.9	122.7	103.9
NWMN_0298	hypothetical protein	36.13	12.64	9.727	33.95	76.56	47.75	17.68	186	20.77	12.89	22.18	14.53
NWMN_0299	hypothetical protein	80.35	50.59	39.09	103	138.8	119.8	66.36	57.25	48.14	46.64	65.24	49.57
NWMN_0300	hypothetical protein	427.3	266.3	160	242.8	311.4	255.8	221.9	184.9	171.3	202.8	232.2	162	J
NWMN_0301	hypothetical protein	108.4	96.48	50.32	84.87	126.7	121.7	70.97	87.33	47.83	71.84	70.42	50.86
NWMN_0302	hypothetical protein	500.75	350.6	238.5	354.25	409.7	460.9	341.75	264.95	211.25	318.95	312.05	263.25	S
NWMN_0303	hypothetical protein	147.4	108.6	52.12	92.74	116.3	179.5	97.57	71.36	59.37	108.7	94.64	88.68
NWMN_0304	phage minor structural protein	154.5	101.6	65.02	115.1	135.6	140.8	99.86	80.54	91.7	123.9	106.4	88.58	E
NWMN_0306	phiETA ORF57-like protein	7128	1424	2421	1552	1750	1087	1139	501.2	370.6	776.6	528.8	355.4
NWMN_0314	hypothetical protein	1764	1819	808.9	1358	1696	1033	1546	1232	624.5	1734	1179	553.4	I
NWMN_0315	NADH-dependent flavin oxidoreductase Oye	2078	2305	898.5	1748	2065	1163	1385	1488	768.1	1489	1587	651.1	C
NWMN_0316	hypothetical protein	1386.57	1190.51	682.171	996.8	1157.73	1030.3	1227.39	724.157	677.643	1274	1010.5	824.443	C
NWMN_0317	glycine cleavage system protein H	1745	1631	872	1197	1389	1240	1619	1027	964.2	1714	1348	1235	E
NWMN_0318	hypothetical protein	1414.43	1044.29	736.071	995.571	1132.43	878.729	1193.14	815.343	646.429	1261.57	1057.86	858.443	R
NWMN_0319	hypothetical protein	1042.23	1055.29	541	732.229	828.686	578.157	803.514	641.171	472.243	1032.84	800.529	574.671	K
NWMN_0320	lipoate-protein ligase A	907	827.4	347.8	616.5	657	389.1	572.9	467.8	354.9	892.6	601	420.5	H
NWMN_0321	oxidoreductase	12496	5590	2291	4743	5422	8738	14137	2302	6816	2697	4131	6960	M
NWMN_0322	ascorbate-specific PTS system enzyme IIC	761.2	611.1	376.5	422.6	742.1	644.3	546.9	420.3	422	589.5	533.1	423.1	S
NWMN_0323	hypothetical protein	1537	1085	722.6	1018	1344	993.8	1009	781.9	638.7	935.1	1060	729.3	G
NWMN_0324	PTS system IIA component	1004.61	690.871	424.914	656.343	868.2	679.8	563.1	425.414	384.629	581.729	670.143	438.014	G
NWMN_0325	BglG family transcriptional antiterminator	612.9	503.7	267	514.9	611.7	549.9	330.3	335.6	258.1	456.3	410.8	288.2	G
NWMN_0326	MarR family regulatory protein	315	299.1	169.1	326.6	175	114.3	328.8	180.5	146.3	381.7	245.5	138.3	K
NWMN_0327	MATE efflux	111.667	115.767	79.62	95.8	132.833	85.2333	129.533	55.6733	82.84	118.1	119.9	96.58	V
NWMN_0328	hypothetical protein	322.1	323	154.2	304.1	256.2	154.5	279.2	299	161.8	329.7	240.9	118.7	S
NWMN_0329	glycerol-3-phosphate transporter	229.8	210.4	104.4	161.8	257.6	263.8	203.3	144.2	152.8	198.2	179.6	163.8	G
NWMN_0330	glyoxalase	15950	12524	8709	8218	12898	17082	10118	8158	6835	7534	7973	8389	E
NWMN_0331	luciferase-like monooxygenase	8523	8351	5501	5939	7582	9419	6145	5838	5424	5166	5188	5909	C
NWMN_0332	NADPH-dependent FMN reductase	1393.14	1484.71	1051.69	1059	1315.43	1466.71	1381.14	1105.77	866.2	915.857	879.886	963.229	R
NWMN_0333	hypothetical protein	493.786	717.029	254.014	398.086	547.014	144	655.143	200.747	242.529	179.549	527.329	119.169	S
NWMN_0334	hypothetical protein	545.3	892.5	420.6	457.3	681.8	421.9	496.7	550	360.2	537.4	507.2	357.3
NWMN_0335	hypothetical protein	11323	16132	6371	9560	12532	9062	6521	7918	4713	10232	10163	3361	J
NWMN_0336	lipoprotein	1708	3077	1272	1249	2163	1087	1082	1451	812.9	1514	1624	562.5	P
NWMN_0337	Dyp-type peroxidase	1834	2463	1599	1138	2329	1389	1267	1649	1007	1599	1836	883.4	P
NWMN_0338	hypothetical protein	659.9	893	523.4	308	607.2	541.7	474	545.4	456.4	810.5	640.2	343.1	P
NWMN_0339	Sec-independent protein translocase TatC	3953	5589	2316	2114	3754	2340	2017	3124	2242	3344	4594	2128	U
NWMN_0340	mttA/Hcf106 -related protein	3498	4567	1373	2116	3941	1660	1908	2337	1373	2606	3253	1288	U
NWMN_0341	hypothetical protein	1474	2328	617.5	1493	2883	1190	691.2	1014	489	1059	1040	348.1	R
NWMN_0342	hypothetical protein	816.1	1495	587.4	798.2	1108	726.8	960.5	1049	590.4	1283	1178	597.1
NWMN_0343	ABC transporter ATP-binding protein	1223	1402	761.7	832	1268	792.1	1523	1066	826	1430	1332	743.2	V
NWMN_0344	hypothetical protein	1177	1674	563.3	1004	1477	818.7	1411	115.8	951.4	0.01	1633	942.8
NWMN_0345	hypothetical protein	704.2	673.8	253.7	675.9	660	321.8	612.7	427.8	287.1	600.5	471.2	170.7	S
NWMN_0346	acetyl-CoA acetyltransferase	4216	4302.5	2236.5	5002	4624	2954.5	4213.5	2962.5	2048.5	5892.5	4451	2562.5	I
NWMN_0347	hypothetical protein	2672.5	3390.5	2385.5	1182	1920	1248	2070	1874.5	1827.5	1860.5	2260.5	1390	R
NWMN_0348	5-methyltetrahydropteroyltriglutamate--homocysteine methyltransferase	4276	5442	3836	1468	2690	1947	2948	1870	2696	1387	3728	2241	E
NWMN_0349	bifunctional homocysteine S-methyltransferase/5,10-methylenetetrahydrofolate reductase protein	1659.43	1774.57	1214.86	322.143	661.329	620.871	955.343	916.186	930.143	638.243	1045	755.657	E
NWMN_0350	trans-sulfuration enzyme	1351	1657	1044	305.4	598.9	483.1	600.4	796.9	793.3	540.9	943.9	607.2	E
NWMN_0351	Cys/Met metabolism PLP-dependent enzyme	2207	3287	2443	602.8	1051	1264	1287	1784	1677	1408	2020	1334	E
NWMN_0352	hypothetical protein	595.9	350.7	95	159.8	360.7	208.2	165.7	141.1	117.4	202.7	146.3	97.24
NWMN_0353	ParB family chromosome partioning protein	59518	18823	6203	13734	18422	6318	3727	1877	1059	6407	2526	884.7	K
NWMN_0354	hypothetical protein	4620	6266	2721	4623	5166	2689	4175	3409	2176	5649	5151	2084	M
NWMN_0355	translation-associated GTPase	3501.67	4055	2199.67	3142	3690.67	2526.67	3547.67	2557	1972	4647.67	3723.33	1918	J
NWMN_0356	hypothetical protein	611.3	521.6	395.5	525	712.7	562.6	713.1	497.6	439.8	680.5	613.2	385.5
NWMN_0357	30S ribosomal protein S6	11379	6716	5163	10922	11667	9759	7655	7793	6034	11046	10273	8099	J
NWMN_0358	bacteriophage L54a single-stranded DNA binding protein	12900	6874	5091	10555	11599	9722	7413	8249	6470	11726	10502	8185	L
NWMN_0359	30S ribosomal protein S18	577.05	435.1	282.145	492.15	597.1	478.05	504.75	399.25	326.34	568.65	500.15	368.545	J
NWMN_0360	hypothetical protein	322.4	356.5	146.1	262.6	228.9	89.72	272.3	191.4	112.7	287	202.7	74.96
NWMN_0361	integrase-like protein	717.56	680.86	257.92	395.82	582.44	245.5	394.56	385.66	208.02	433.3	403.06	135.08	L
NWMN_0362	exotoxin 2	2018	2274.5	1222.5	772.5	955.3	555.35	2257	1404	1280.5	2916.5	2788	1848
NWMN_0363	hypothetical protein	266.2	248.3	127.8	196.6	246.7	140.9	302	188.1	114.4	226.7	203.4	106.5	S
NWMN_0364	hypothetical protein	15996	23490	32768	22354	15525	13081	58914	32351	30360	29697	29344	28738	S
NWMN_0365	hypothetical protein	1041	877	750.1	640.1	1119	770.4	1094	1027	990.6	736.1	711.2	336	K
NWMN_0366	hypothetical protein	710.1	610.8	1005	917.2	835	508.9	1507	1203	945.1	1073	938.8	727.9	S
NWMN_0367	phosphoglycerate mutase	893.4	1601	446.9	1052	1040	278.1	740.1	843.6	442.4	1139	994.2	306.1	G
NWMN_0368	hypothetical protein	1065	1452	785.8	1116	1174	810.5	970.8	816.8	805.8	1353	1197	692.6
NWMN_0369	hypothetical protein	4314.71	6089.43	2882.14	3191.14	3935.14	1178.66	4212.29	3374.14	2271.14	3638.14	4051	1842.86
NWMN_0370	hypothetical protein	2126	4580	1511	2052	3020	610.3	2107	2262	1286	2271	2256	742.9
NWMN_0371	alkyl hydroperoxide reductase subunit F	41007	34974	26879	26319	39406	32301	30944	34275	27566	32268	35682	28997	O
NWMN_0372	alkyl hydroperoxide reductase subunit C	63267	63572.5	33819.5	53087.5	62855.5	54122.5	53602	43832	44027.5	43796	57844.5	51134	O
NWMN_0373	NAD(P)H-flavin oxidoreductase	1576	2690	770.5	1538	2588	1326	1736	931.7	887.5	112.4	1550	785.2	C
NWMN_0374	sodium:dicarboxylate symporter	1623	2520	1548	578.7	870.2	984.8	1843	3870	2619	1789	4127	3545	R
NWMN_0375	hypothetical protein	8777.5	9025	1786.5	4326.5	4848.5	1425.1	8542	4069.5	2552.5	5587	4958.5	1535.15
NWMN_0376	hypothetical protein	23331	24574	12358	9611	14761	14095	16461	12397	11989	14351	14196	8748
NWMN_0377	hypothetical protein	4120	5742	6467	4568	4188	2609	11910	6910	7760	6410	6297	5361
NWMN_0378	xanthine phosphoribosyltransferase	36951	39059	16129	23800	39267	17597	23106	24494	14612	26856	30440	10191	F
NWMN_0379	xanthine permease	48405	52695	21096	30365	41916	25647	26564	31738	17957	30332	37611	12248	F
NWMN_0380	inosine-5'-monophosphate dehydrogenase	63748	65157	42424	41046	65185	44461	46087	53792	36822	47792	64194	33353	F
NWMN_0381	bifunctional GMP synthase/glutamine amidotransferase protein	31476	31900	23979	19408	29448	20674	28501	26433	20369	23995	33420	17500	F
NWMN_0382	hypothetical protein	822.4	852.7	295.8	338.7	520.7	227.6	580.4	283.7	292.7	21.43	482.9	254.4
NWMN_0383	hypothetical protein	270.55	294.85	117.97	137.375	155.595	78.495	264.4	143.85	111.45	169.45	160.15	73.73	T
NWMN_0384	transposase	350.8	474.7	259.9	157	182.6	114.8	290.5	240.8	221.3	318.2	291.4	183.7	L
NWMN_0386	hypothetical protein	543	783.4	416.3	546.8	793.9	559.6	400.7	406.2	331.1	391.4	439.6	326.2	S
NWMN_0387	hypothetical protein	1292.13	1389	643.4	1077.07	1865.67	1095.27	632.467	767.3	496.167	634.367	797.733	510.6	M
NWMN_0388	superantigen-like protein	3071	1654	3410	1502	2386	4613	2042	1644	4351	1921	1802	2667
NWMN_0389	superantigen-like protein	105	71.49	66.04	66.63	89.3	96.62	95.37	93.65	59.32	78.09	71.46	63.81
NWMN_0390	superantigen-like protein	902.6	566.7	398.1	324.3	410.8	397.9	383.6	342.6	270.8	423.2	373.8	336.9
NWMN_0391	superantigen-like protein	146.4	108.8	81.04	96.6	122	73.2	80.03	98.04	77.13	99.37	95	102.1
NWMN_0392	superantigen-like protein 5	37.14	36.95	15.62	37.99	31.62	14.23	94.11	25.14	23.75	43.29	27.75	20.55
NWMN_0393	superantigen-like protein	79.55	49.78	18.77	44.39	49.93	34.33	151.6	32.47	26.79	51.64	40.65	24.02
NWMN_0394	superantigen-like protein 7	80.95	79.84	31.1	81.48	88.3	35.06	61.71	56.08	43.2	84.47	74.85	40.37
NWMN_0395	superantigen-like protein	147.4	175.3	76.37	128	136.1	81.01	203.2	102.9	108	188.4	140.4	73.65
NWMN_0396	superantigen-like protein	92.86	106.8	50.42	76.18	78.51	39.08	59.39	59.12	41.17	97.76	70.22	37.26
NWMN_0397	superantigen-like protein	443.3	391.2	174.1	381.2	331.1	156	486.7	259.1	1207	371	249.1	166.9
NWMN_0398	type I restriction-modification system M subunit	4537	5654	914.7	3812	3814	605.5	2864	2624	877.4	3904	3289	486.5	V
NWMN_0399	restriction modification system specificity subunit	2845	2870	841.8	1894	1923	520.8	1840	1004	569.7	119.2	2219	387.1	V
NWMN_0400	superantigen-like protein	202.9	118.2	56.15	116	99.13	67.97	228.7	92.46	81.74	374.3	150.7	98.03
NWMN_0401	hypothetical protein	710.34	301.04	272.9	222.64	313.12	250.06	668.34	330.58	272.04	344.84	251.86	243.06
NWMN_0402	hypothetical protein	2445.43	3876.57	3608.71	1843.86	2751.29	2323.43	3595.71	3950.71	3827.29	2660.14	3674	2712
NWMN_0403	hypothetical protein	321.5	352.9	112	271.5	332.7	106.6	198.7	183.9	101.8	285.5	184.8	55.5
NWMN_0404	staphylococcal tandem lipoprotein	785.9	767.1	366.8	589.4	689.1	422.3	597.7	424.9	334.2	675.6	464.9	262
NWMN_0405	staphylococcal tandem lipoprotein	409.3	613.4	351.4	274.6	405	303.1	373.2	292	262.8	369.4	306	192.4
NWMN_0406	staphylococcal tandem lipoprotein	211.4	177	120.9	127.9	152.8	113.2	133.5	309.7	71.1	134	128.3	73.58
NWMN_0408	staphylococcal tandem lipoprotein	591	568.1	194.5	382.5	366.5	210.9	394.3	276.7	181	1154	264.8	124.1
NWMN_0409	staphylococcal tandem lipoprotein	554.1	597.7	153.3	384.1	463.3	202.9	385.4	286.5	189	358.4	318.7	123.1
NWMN_0410	staphylococcal tandem lipoprotein	1850	1509	716.7	1158	1239	1014	1565	780.8	584.2	1271	846.1	576.3
NWMN_0412	staphylococcal tandem lipoprotein	5942	9232	1577	5894	6765	3902	5717	2490	3643	322.5	2184	2999
NWMN_0413	hypothetical protein	6470	10098	4160	5547	7127	4375	5645	6389	4137	7239	6844	3095	U
NWMN_0414	hypothetical protein	6891	11152	4920	7269	9074	5251	6153	7068	4949	7859	7797	3563
NWMN_0415	hypothetical protein	3323	5638	2276	3811	4395	2363	3412	3597	2771	4639	4412	2022
NWMN_0416	hypothetical protein	1425	2152	1286	1121	1725	1320	1268	1829	1459	1899	1918	1205
NWMN_0417	cobalamin synthesis protein	104.7	128.2	93.06	99.5	128.9	89.33	71.65	108.2	110.3	114.7	121.6	76.93	R
NWMN_0418	NADH dehydrogenase subunit 5	3578	3258	472.8	2033	3569	2692	2241	1379	1415	1433	3227	1711	C
NWMN_0419	hypothetical protein	2840	2230.5	1248	1598.5	2844.5	2668.5	1505.5	1781.5	1554.5	1464.5	2309.5	1728.5	S
NWMN_0420	hypothetical protein	3852	5068	2709	3305	4316	3010	3470	3087	2886	3525	3788	2180	S
NWMN_0421	hypothetical protein	1781	1988	760.3	1226	1507	560.4	1307	1086	706.9	1576	1379	599.3	I
NWMN_0422	hypothetical protein	1476.71	1587.57	678.029	1012.17	1246.86	564.9	1331.43	817.029	651.6	1114.14	1289	593.771	R
NWMN_0423	sodium-dependent symporter protein	54.78	105.335	21.565	49.775	53.935	30.55	55.46	40.635	30.605	49.35	43.2	32.785	R
NWMN_0424	cysteine synthase	138.8	88.14	63.19	103.9	96.51	94.17	116.6	89.57	51.86	90.83	90.3	91.26	E
NWMN_0425	trans-sulfuration enzyme	198.9	188.4	99.86	173.1	190.8	120.6	227.7	113.7	88.57	173.8	152.7	99.27	E
NWMN_0426	ABC transporter ATP-binding protein	227.7	282.8	104.8	170	227.1	164.7	211.7	375.2	126.5	216	235.2	105.1	P
NWMN_0427	ABC transporter permease protein	577.256	580.267	396.722	323.9	461.656	538.367	566.4	356.778	317.411	412.172	494.989	311.778	P
NWMN_0428	ABC transporter substrate-binding protein	1719	1662	1181	867.7	1175	1063	1852	988.6	909.5	974.3	1135	977.1	P
NWMN_0429	secretory antigen SsaA-like protein	17301	19698	5547	17849	26323	8913	6753	7769	3025	16376	10984	2919	M
NWMN_0430	hypothetical protein	310.1	475.3	66.9	269.7	568.7	225.5	371.8	0.01	131.4	228.2	163.3	107.4
NWMN_0431	MutT/nudix	1271	1835	864.4	1336	1560	924.5	1451	1065	804.6	1822	1437	787.6	L
NWMN_0432	hypothetical protein	531.9	623.5	264.7	352.7	537.7	432.7	554.2	286.5	325	489	428	635.8	K
NWMN_0433	hypothetical protein	1552	2550	1058	1578	2768	1204	1326	1422	889.2	1653	1995	615.8	S
NWMN_0434	hypothetical protein	1687	2583	326	1798	2155	305.9	1246	883.9	289.1	1056	946.1	119.7	S
NWMN_0435	LysR family transcriptional regulator	332.3	491	61.5	252.3	304.2	52.36	182	191.2	65.91	290.2	233.6	35.37	K
NWMN_0436	glutamate synthase large subunit	391.6	469.7	230.7	190.4	436.3	292.2	217.9	316.3	214.4	296.3	361.4	236.2	E
NWMN_0437	glutamate synthase subunit beta	657.3	718.314	389.529	323.343	655.243	670.129	388.957	537.357	420.086	447.629	550.329	401.014	E
NWMN_0438	PTS system trehalose-specific IIBC component	1416	650.4	695.5	872.1	653.1	697.5	1904	629.7	671	1424	736.9	911	G
NWMN_0439	alpha amylase	730.9	432.4	389.1	487.6	560.2	604.6	801.9	369.3	317.6	648.8	388.9	396.9	G
NWMN_0440	trehalose operon repressor	488.9	400.7	288	444.1	434.4	391.1	626.5	278.1	278.4	519	327.4	306	K
NWMN_0441	acetyltransferase GNAT	2083	1865.57	719.143	1627.29	1907.71	858.357	1411.86	1134.57	700.171	2262.43	1468.71	588.343	R
NWMN_0442	DNA polymerase III gamma subunit	5978	7024	2215	4991	7470	3146	3471	3878	1885	5664	4511	1506	L
NWMN_0443	hypothetical protein	20367	23235	13626	16440	24180	16130	16053	18404	12586	22458	20905	11274	S
NWMN_0444	recombination protein RecR	3960	5454	854.7	3081	3971	2127	4466	240.1	2222	2495	3320	1919	L
NWMN_0445	Orn/Lys/Arg decarboxylase	689.1	786	293	609.9	686.5	289.4	763.5	452.6	309.9	754.6	520	213.4	E
NWMN_0446	thymidylate kinase	1108	1255	2753	995.3	1226	633.7	1045	776.1	526.3	1085	833.7	343.8	F
NWMN_0447	hypothetical protein	5904	4301	3013	3803	4012	3167	4157	2646	2471	3832	2621	2175	S
NWMN_0448	DNA polymerase III delta prime subunit	4292	6121	1725	3449	4695	686.5	3139	2915	1210	3428	2826	561.9	L
NWMN_0449	hypothetical protein	4177	6224	2399	3467	4062	1388	3709	3395	1977	4194	3217	1008	S
NWMN_0450	DNA replication intiation control protein YabA	757.8	1111	425.8	706.8	796	282.7	868.1	569.1	385.9	789.1	708.1	259.9	S
NWMN_0451	hypothetical protein	179.5	105	38.14	104.5	104.3	58.44	81.07	83.12	41.19	140.8	67.26	31.33	R
NWMN_0452	tetrapyrrole methylase	575.9	449.8	172	483.7	430.7	173.8	379.4	245.2	154.6	484.9	356.8	126.3	R
NWMN_0453	methionyl-tRNA synthetase	4576	5253	836.6	5058	4861	734.9	3873	2597	869.8	4540	3558	571.2	R
NWMN_0454	TatD related DNase	4140	4786	2593	3972	4889	2916	3736	3611	2500	5254	4592	2215	L
NWMN_0455	hypothetical protein	2606.57	3123.86	1455.57	2674.71	3419.14	1618.29	2076.86	1925.43	1444.71	2656.43	2240.57	1198.57	L
NWMN_0456	dimethyladenosine transferase	1818	1945	360.5	1237	2113	838.2	1779	994.4	888.4	137.9	803.6	657.3	J
NWMN_0457	hypothetical protein	1754	1405	2059	1992	1297	1126	4331	2143	2435	2024	1901	1885	S
NWMN_0458	4-diphosphocytidyl-2-C-methyl-D-erythritol kinase	8195	8274	3023	6047	7285	2970	6620	6285	2813	8901	6752	2687	I
NWMN_0459	purine operon repressor	65177	65170	65161	65183	65182	65177	65162	65180	65181	65171	65181	65180	F
NWMN_0460	endoribonuclease L-PSP	65178	65172	65170	65178	65183	65178	65158	65179	65181	65169	65185	65181	J
NWMN_0461	regulatory protein SpoVG	13695	14923	18094	12516	11773	11951	29271	18297	17714	17424	13868	14367	M
NWMN_0462	UDP-N-acetylglucosamine pyrophosphorylase	16650	13136	6679	13678	18323	10665	9079	9341	5515	14716	12012	6982	M
NWMN_0463	ribose-phosphate pyrophosphokinase	18548	13268	7656	11891	20208	12155	11765	11313	6947	14814	13646	7882	F
NWMN_0464	50S ribosomal protein L25/general stress protein Ctc	3635	3287	1807	3431	4418	2279	3108	2357	2021	4446	3305	2267	J
NWMN_0465	peptidyl-tRNA hydrolase	6038	8461	2118	6194	6974	2140	5559	4769	1892	7184	5442	1404	J
NWMN_0466	transcription-repair coupling factor	2568.67	3490.33	1323.33	2017.67	3015	1342.67	2060.67	2205.33	1342	2872.67	2559.33	1070	L
NWMN_0467	hypothetical protein	5646	4304	2798	2217	4286	3932	3506	2805	3199	4297	4404	3194	R
NWMN_0468	tetrapyrrole methylase	14344	13351	8183	9327	15162	12708	11062	9463	7901	12318	12306	8044	R
NWMN_0470	hypothetical protein	2970	3386	1548	2157	2397	1497	3181	476	1595	1363	2385	1268	J
NWMN_0471	hypothetical protein	9329	14023	4100	8140	11944	4348	6836	9703	5194	10251	12428	4006	D
NWMN_0472	hypoxanthine phosphoribosyltransferase	7690	9976	3257	6388	8992	3363	5668	7136	3888	7732	10595	3445	F
NWMN_0473	ATP-dependent metalloprotease FtsH	14241	18378	6702	9987	17487	7986	10420	13117	6780	13347	17003	6100	O
NWMN_0474	chaperonin HSP33	20304	9389	7562	3760	6321	5693	10078	3832	3203	3753	3512	3890	O
NWMN_0475	cysteine synthase-like protein	5292	4842	4442	3737	5619	4953	10535	5056	4166	3583	3136	3285	E
NWMN_0476	dihydropteroate synthase	678.8	889.9	408.8	617.4	839.3	603.9	698.8	610.6	371	680.2	549.3	302.8	H
NWMN_0477	dihydroneopterin aldolase	1089	1549	208.8	1189	1283	872.3	1149	20	512.9	421.4	766.3	502.9	H
NWMN_0478	2-amino-4-hydroxy-6-hydroxymethyldihydropteridine pyrophosphokinase	1784	1164	651.6	1332	1698	1153	1288	531.5	635.4	1255	1152	734.7	H
NWMN_0479	lysyl-tRNA synthetase	4987.71	6284.43	2848.57	5052.71	5423.86	3785.57	4552.71	3670.71	2759	7110	5055.57	2772.14	J
NWMN_0480	GntR family regulatory protein	197.4	204.071	85.4757	161.271	126.497	71.1029	270.2	115.766	92.8386	188.386	166.586	72.3314	K
NWMN_0481	pyridoxine biosynthesis protein	3885	3297	1496	3800	1899	1071	7068	1825	1453	3716	2566	1558	H
NWMN_0482	glutamine amidotransferase subunit PdxT	345.3	342.2	197.5	316.1	259.6	180.1	1096	445.9	176.5	421.4	261	169	H
NWMN_0483	pyrimidine nucleoside transport protein	6112	8313	476.3	6478	5961	695.8	6242	2508	961.8	5951	4897	563.4	F
NWMN_0484	transcription repressor of class III stress genes	4028.71	5994.57	1908.29	3271.14	4159.57	2559.71	2563.86	3312.57	1667.29	3793.43	3875	1579	K
NWMN_0485	UvrB/UvrC motif-containing protein	10047	14720	5375	7752	11304	5978	5573	7338	4033	8373	8707	4305	S
NWMN_0486	ATP:guanido phosphotransferase	6401	8438	3147	4277	6228	3481	3601	4248	2872	4793	5390	2686	E
NWMN_0487	ATP-dependent Clp protease ATP-binding subunit ClpC	3769	3759	2662	2325	3553	2782	3298	3310	2485	3080	3354	2337	O
NWMN_0488	DNA repair protein RadA	8410	9245	4360	7052	10263	6293	6097	6553	3561	10010	8175	3982	O
NWMN_0489	PIN/TRAM domain-containing protein	4522	4819	2441	3700	4585	3768	3477	2950	2365	4574	4582	2594	R
NWMN_0490	glutamyl-tRNA synthetase	11956	11605	5728.57	8255.14	14305.4	8550.71	7426.71	9029.86	5639	9793.29	11007.4	5161	J
NWMN_0491	serine acetyltransferase	13993	22271	9762	9670	21094	14258	6673	12915	9641	12140	15181	7660	E
NWMN_0492	cysteinyl-tRNA synthetase	9953	12168	6615	5299	10297	7710	4461	7966	5978	8015	9912	5873	J
NWMN_0493	hypothetical protein	15387	18377	10312	7549	16260	12034	7939	11421	8910	11282	14641	8255	S
NWMN_0494	hypothetical protein	11588	13831	7988	5502	11378	8023	6692	8670	7038	7926	10527	6227	J
NWMN_0495	hypothetical protein	10369	12311	7368	5375	10833	8133	6061	7998	7042	7310	10020	5769	R
NWMN_0496	hypothetical protein	9991	10306	5301	4358	8094	5364	5187	7024	4789	6352	9199	4380	K
NWMN_0497	preprotein translocase subunit SecE	13891	15801	6017	11375	15081	6760	8349	9904	5865	11616	12273	5235	U
NWMN_0498	transcription antitermination protein	18339	21075	10126	15660	16099	9310	13099	13658	8865	17048	18708	9192	K
NWMN_0499	50S ribosomal protein L11	15385	14732	7334	12254	15111	8279	11458	11474	7769	13201	13807	7807	J
NWMN_0500	50S ribosomal protein L1	3258	3397	1422	2706	0.01	1800	2914	2261	1483	3205	2738	1239	J
NWMN_0501	50S ribosomal protein L10	5373	2697	2177	5364	5271	3930	4438	2837	2590	7710	4477	3723	J
NWMN_0502	50S ribosomal protein L7/L12	1146	644	630.7	1167	1033	1055	943.1	608.2	657.8	1532	922.4	1053	J
NWMN_0503	hypothetical protein	2309.5	1970.5	910.65	1598.5	2001	1262.5	1512.5	1270	951.05	1875	1782.5	1108.5	J
NWMN_0504	DNA-directed RNA polymerase subunit beta	27930.9	23991.9	12973.6	17217.7	26027.3	18607.7	15607	19286.1	13007.9	22228.9	27734	17461.1	K
NWMN_0505	DNA-directed RNA polymerase subunit beta	46873	35841	21063	23128	37557	28716	22405	30986	25040	32421	43607	30103	K
NWMN_0506	ribosomal protein L7Ae-like	47402	32657	21997	35237	44702	42107	26524	28203	21925	36419	40630	31779	J
NWMN_0507	30S ribosomal protein S12	39132	28317	17224	28738	37587	31279	22158	23279	17971	29891	32621	25751	J
NWMN_0508	30S ribosomal protein S7	36770	26559	16355	28350	36397	31403	20445	20954	15788	29739	34409	27592	J
NWMN_0509	elongation factor G	44700.4	29331.2	19014.8	31529.4	38068.8	35613.6	23735.8	27051.6	21163	37763	41832.6	36093.6	J
NWMN_0510	elongation factor Tu	51828	54497	23326	47060	50235	34364	37682	33131	22567	39280	58733	41144	J
NWMN_0511	M20/M25/M40 family peptidase	1485	2479	654.9	1672	2166	752.2	1390	1334	508	1811	1570	395.7	R
NWMN_0512	2-amino-3-ketobutyrate coenzyme A ligase	12408	20399	5329	15470	14846	5289	14540	6831	5437	863.3	14253	3968	H
NWMN_0513	chaperone protein HchA	30791	25391	15947	14069	15587	14464	55516	17089	20129	14122	17336	19069	R
NWMN_0514	ribulokinase	2473	3087	476	2702	2721	486.6	2810	1337	496.4	2177	1521	301.9	C
NWMN_0515	L threonine 3 dehydrogenase	4756.5	7317	3985.5	4473	6337.5	3519.5	5915.5	4745.5	3478.5	6985	5645	3070	M
NWMN_0516	branched-chain amino acid aminotransferase	11590	18367	3682.57	9642	13982	4877.43	8161	5129.61	3931.14	5055.01	11325	2752.43	E
NWMN_0517	haloacid dehalogenase-like hydrolase	6354	10243	4256	4520	7657	3835	5568	5386	3486	5516	6664	2288	R
NWMN_0518	deoxynucleoside kinase	2340	3197	1058	1800	2181	665.7	1681	1619	882.6	2143	1550	458.3	F
NWMN_0519	deoxynucleoside kinase	804.3	1398	355.2	812.9	929.9	140.3	703.7	608.5	227.1	1111	570.3	141.8	F
NWMN_0520	hypothetical protein	2683	3119	1004	2428	2634	747.6	2030	1390	761.2	2196	1729	455.2	F
NWMN_0521	hydrolase haloacid dehalogenase-like	5594	10546	2229	5485	6254	1442	5064	4917	1650	7077	5151	1039	R
NWMN_0522	hypothetical protein	863.5	1389.5	459.6	710.7	1023.5	361.9	1092.5	793.2	449.5	925.55	916.2	272.2	R
NWMN_0523	sdrC protein	124.6	130.1	39.88	71.4	84.25	50.71	87.16	89.45	51.63	106.5	74.6	35	M
NWMN_0524	sdrD protein	1595	2136	657.6	578.7	770.6	377.9	1047	866.2	605.3	1254	1085	388.9	M
NWMN_0525	Ser-Asp rich fibrinogen/bone sialoprotein-binding protein SdrE	1110	4043	1359	1033	2402	1180	927.1	2091	961.2	1050	1911	661.8
NWMN_0526	glycosyl transferase group 1	1219	1857	805.8	1046	1340	838.6	1200	1057	787.1	1526	1268	587	M
NWMN_0527	glycosyl transferase group 1	3884.29	5478.86	3236.14	3272.57	5271.86	3888.71	3049.29	3202.27	2934.64	3332.96	3641.57	2536.57	M
NWMN_0529	GTP cyclohydrolase	2892	2664	1116	1550	1597	862.1	2535	1389	946.1	2130	1730	809.8	S
NWMN_0530	hypothetical protein	6292	5647	1776	3469	3761	1629	4172	1318	1548	4005	3597	1374	S
NWMN_0531	hypothetical protein	4446	4500	1101	3245	2702	1346	2876	2686	1453	3672	2924	1033
NWMN_0532	glucosamine-6-phosphate isomerase	4423	5426	2493	4077	4462	2906	4225	2978	2468	5649	4239	2848	G
NWMN_0533	hexulose-6-phosphate synthase	13979	15602	13135	11628	12898	14115	24798	12256	12626	13017	9528	10951	G
NWMN_0534	SIS domain-containing protein	13974	15854	10527	12208	12982	14616	24159	10653	10943	11309	8680	9402	M
NWMN_0535	hydrolase haloacid dehalogenase-like	614.1	1467	369.4	404.2	619.7	201.6	517.5	538.2	331	732	855.7	192.2	R
NWMN_0536	proline/betaine transporter	1100	470.1	593.7	625.9	729.7	1328	1537	429.2	489.9	419.4	299.6	524.6	G
NWMN_0537	hypothetical protein	97.38	193.6	20.89	199.7	256.8	148.3	151.9	88.33	27.73	75.68	88.12	18.28
NWMN_0538	long chain fatty acid CoA ligase vraA	153.1	243.5	120.3	122.7	172.2	53.2	79.13	121.8	39.04	142.6	122.2	38.53	I
NWMN_0539	acetyl-CoA acetyltransferase	1542	1008	591.6	815.2	1124	736.4	1021	824.5	471.1	837.7	872.1	435.5	I
NWMN_0540	hypothetical protein	1143	1073	458.5	738.5	926.6	434.5	876.6	607.7	307.7	639.5	704.8	275	J
NWMN_0541	hypothetical protein	686.35	716.6	324.25	596.9	721.55	388.6	713.45	447.7	271.1	602.05	545.4	250.35
NWMN_0542	hypothetical protein	7280.43	9250.29	6838.43	20574.6	25058.6	21073.9	24823.6	6875	8288	14334.6	10464.9	11352.6
NWMN_0543	phosphomethylpyrimidine kinase	2970	4422	1501	3018	3515	1552	3565	2708	1494	3676	3087	1109	H
NWMN_0544	uracil-DNA glycosylase	2950	2809	864.6	3481	3108	1087	2591	1702	876.8	3804	2122	654.9	L
NWMN_0545	hypothetical protein	2994.14	3160.14	958.329	3950	3160.57	1019.17	2873	1886.86	896.614	3714.43	2408.71	710.671
NWMN_0546	hypothetical protein	274.6	327.4	124.9	365.1	346.4	332.5	295.6	233.5	131.4	407.3	262.9	122.9	S
NWMN_0547	amino acid permease	2086	1031	1080	722.8	1433	2555	1881	999.9	789.8	1076	681.9	971.1	E
NWMN_0548	hypothetical protein	6033	3689	3810	2582	3572	4253	5143	2806	2452	3458	2834	2548	S
NWMN_0549	hypothetical protein	5082	3122	1993	1937	2645	2693	3675	1950	1936	2494	2273	1807	S
NWMN_0550	heme peroxidase	3547	6030	1263.33	3612	5115.33	950.133	4401	3420	1381	3752	4515.67	962.933	S
NWMN_0551	phosphotransacetylase	7020.71	6320	3738	5988.86	7470.57	4499.29	8263.43	5065.86	3476.29	6957.57	5829.71	3109.43	C
NWMN_0552	lipoate-protein ligase A	7405	6948	4212	6186	7538	4973	8832	4918	4132	7820	6332	3491	H
NWMN_0553	mevalonate kinase	5583	1755	2066	1791	1653	1859	4634	1445	2513	1944	1414	1820	I
NWMN_0554	mevalonate diphosphate decarboxylase	3823	1309	2019	1530	1370	2371	4124	986.9	1053	1622	948.2	1614	I
NWMN_0555	phosphomevalonate kinase	5978	2513	3600	3493	2424	4248	7678	1959	2786	3473	1866	3203	I
NWMN_0556	hypothetical protein	544.7	323.5	357	321.6	315.7	348	573.5	264.6	259.2	379.4	234.9	348.4
NWMN_0557	pyridine nucleotide-disulfide oxidoreductase	783	838.7	426.5	576	566	404.9	624.9	3.761	336	485.6	666.6	355.4	C
NWMN_0558	hypothetical protein	788.7	976.3	348.9	582.3	742.2	397.6	596	447.4	298.2	829.3	669.7	256.2	K
NWMN_0559	hypothetical protein	2873	5391	2133	2071	3295	1405	2993	3224	1600	3332	3004	1054	L
NWMN_0561	hypothetical protein	4775	4348	1905	1939	3013	1253	3465	2963	1612	3034	3174	1018
NWMN_0562	hypothetical protein	3144	3361	1117	1385	2203	1171	2253	153.1	1219	21.54	2332	921.9
NWMN_0563	hypothetical protein	3169	3468.5	1838.5	1273	2159	1285.6	2634.5	2181.5	1684.5	2445	2564.5	1191.7
NWMN_0565	hypothetical protein	1707	1999	1027	990.9	1312	681.6	1776	1294	1076	1640	1574	788.2
NWMN_0566	hypothetical protein	1181	1406	597.2	629.4	825.9	274.2	1283	770	492.2	1035	961.2	274.1
NWMN_0567	hypothetical protein	988.4	1344	377.4	600.2	775.2	177.3	929.5	165	365.1	534.4	852.8	191.9
NWMN_0568	hypothetical protein	1780	2123	680.9	940.5	1480	815.9	1402	1270	726.3	1794	1574	456.2
NWMN_0570	hypothetical protein	2048	2411	414.2	1381	1653	885.2	1465	1226	716.6	1571	1715	594.3
NWMN_0571	hypothetical protein	2044	2000	927.1	1284	1828	916	1404	1361	983.6	1776	1651	771
NWMN_0572	aldo/keto reductase	2504	2372	1148	2064	2634	1601	1631	1538	1164	2299	1955	1032	C
NWMN_0573	hypothetical protein	4524	5103	2137	4290	4594	2441	4060	2611	1999	4037	3690	1528	R
NWMN_0574	acetyltransferase GNAT	8753	14834	2755	7043	8966	1694	6321	7077	2737	8141	8290	1296	K
NWMN_0575	HD domain-containing protein	12065	19049	7108	6574	11743	4906	10159	11139	6657	13554	14151	4493	R
NWMN_0576	hypothetical protein	3749	6465	3168	2669	4153	2241	4362	4049	3055	4248	5018	1975
NWMN_0577	alcohol dehydrogenase	4212	1614	4164	2911	2092	5533	4676	1243	4338	3656	1961	5473	R
NWMN_0578	hypothetical protein	12513	14468	4342	9832	10397	3664	10633	1691	5448	6174	12929	4187	S
NWMN_0579	arginyl-tRNA synthetase	6166.5	7429	2010.7	4929	5852	2150.5	5667	3276.69	2770	6926	6273.5	2188.5	J
NWMN_0580	endonuclease III	178.6	399.5	98.58	247.4	329.4	237.1	121.4	178.9	92.94	167.1	188.2	64.05	L
NWMN_0581	iron compound ABC transporter substrate-binding protein	2551	3778	695.1	2121	2278	310	2267	1687	496.5	2598	1842	377.4	P
NWMN_0582	iron compound ABC transporter permease protein	3387	5570	1286	3580	4239	1318	2619	2617	1288	4032	2985	764.9	P
NWMN_0583	haloacid dehalogenase-like hydrolase	4077	6211	2752	3784	4768	2539	4214	3522	2680	5584	4247	1999	R
NWMN_0584	hydrolase	3972	4859	2366	3718	4195	2089	3545	3010	2320	4642	3506	1584	R
NWMN_0585	hypothetical protein	8496	9918	13757	6444	6855	9496	17690	10762	17640	12673	11643	13610
NWMN_0586	hypothetical protein	10793.5	10743.5	7780	4973	7131.5	7663	8718	6199.5	8713.5	7039.5	6116.5	6638
NWMN_0587	alpha/beta fold family hydrolase	16283	6419	9421	9392	8589	15225	15182	4345	9282	7513	4613	9019	R
NWMN_0588	staphylococcal accessory regulator A	2312	2069	2590	2316	1959	1994	3836	1789	2739	1914	1666	2168	K
NWMN_0590	hypothetical protein	1447	2248	331.2	1031	1685	1191	1000	949.1	717.6	547.8	1205	582.8	S
NWMN_0591	hypothetical protein	279.55	371.3	180.05	191.65	250.95	190.65	252.65	251.9	191.85	228.15	193.4	130.98
NWMN_0592	integrase/recombinase	7596	4296	4613	2322	3451	4496	9130	3412	3687	3656	3132	3948	L
NWMN_0593	monovalent cation/H+ antiporter subunit A	3491	5174	3741	2668	3014	3939	5140	3958	3042	4342	2370	3891	C
NWMN_0594	monovalent cation/H+ antiporter subunit B	4248	6866	3925	3676	3279	4385	4364	4971	3328	5404	3091	4631	P
NWMN_0595	monovalent cation/H+ antiporter subunit C	5209	6978	4366	3922	3281	5042	4655	5136	3683	6107	3147	4977	P
NWMN_0596	CPA3 family monovalent cation (K+ or Na+):proton (H+) antiporter-3, MnhD subunit (mnhD1)	4481	6146	2975	3081	2720	3600	3790	5223	2877	5593	2834	3862	C
NWMN_0597	monovalent cation/H+ antiporter subunit E	4728	7392	3053	2716	3239	4231	3778	5448	3036	5014	3018	3802	P
NWMN_0598	monovalent cation/H+ antiporter subunit F	4864	7439	3203	2021	3127	4291	3839	5936	3227	5563	3223	3748	P
NWMN_0599	monovalent cation/H+ antiporter subunit G	1146.8	1643	700.15	589.5	721.45	707.35	1017.4	1312.65	624.25	1226.25	770.4	821.7	P
NWMN_0600	Na+/H+ antiporter	5904	7775	1189	2921	4892	3197	5167	1042	3619	151.9	1958	3117	P
NWMN_0601	iron repressed lipoprotein MntC (ABC transporter substrate-binding protein)	65177.4	65172.7	65162.1	65180.3	65180.4	60895.6	65155.1	65181.1	64361.7	65171.9	65181.3	54408.3	P
NWMN_0602	iron (chelated) ABC transporter permease protein	65176	65171	65164	65182	65181	65178	65165	65183	65180	65171	65182	65057	P
NWMN_0603	cation ABC transporter ATP-binding protein MntA	65177.9	65172.6	65162.6	65180.4	65181.7	65145.1	65161.6	65181.7	65180.6	65172.3	65182.1	59513.1	P
NWMN_0604	iron dependent repressor	6356	9733	3628	5607	8215	4283	5397	3537	3718	256	6822	2923	K
NWMN_0605	hypothetical protein	401.4	475	220.7	520.5	592.5	231.7	412.5	327.5	212.5	444.4	361.6	132.1
NWMN_0606	teichoic acid biosynthesis protein	2410.43	3714.71	958	2068.43	2361.29	601.986	2512.86	1803.14	1003.49	2593.86	1908.43	420.814	M
NWMN_0607	teichoic acids export protein ATP-binding subunit	9815.71	11282.3	3275.43	7674	9453.86	4316.57	7252.29	5936.29	3905	10053.7	7696.71	3045.57	G
NWMN_0608	teichoic acid biosynthesis protein	1632	1908	1118	1591	1940	888.8	1996	1501	1027	2034	1290	618.5	G
NWMN_0609	tagB protein	3732	5645	1173	2811	3877	2921	2815	1436	2882	2710	3174	2607	M
NWMN_0610	tagX protein	7044	7974	3551	4389	5404	3036	5465	4137	3707	5341	4990	2763	M
NWMN_0611	glycerol-3-phosphate cytidylyltransferase	3135	3733	1982	2155	2194	1513	3015	2172	1912	3057	2697	1429	M
NWMN_0612	penicillin-binding protein 4	1566.26	1790.57	617.686	1279.17	1713	1082.06	1148.63	1047.31	660.729	1548.29	1332.71	535.471	M
NWMN_0613	ABC transporter ATP-binding protein	23343	31102	23174	12731	18005	17938	30684	25148	24926	29414	29197	25902	V
NWMN_0614	nucleoside permease NupC	2687	3625	1555	1587	1982	1281	2976	1745	1541	3465	2358	1060	F
NWMN_0615	hypothetical protein	7114	7254	3538	7668	7474	4713	5690	5322	3070	8066	6098	3105	S
NWMN_0616	iron compound ABC transporter ATP-binding protein	2371	3980	1664	1308	1871	1201	2573	2016	1497	2796	2350	1355	P
NWMN_0617	ferrichrome transport permease fhuB	557.3	1118	483.2	377.1	659.1	447.7	556.1	615	520.6	586.1	939.6	512.7	P
NWMN_0618	ferrichrome ABC transporter (permease)	784.229	1486.57	710.786	645.786	1122.14	730.671	682.857	1103.34	668.743	982.171	1201.71	676.471	P
NWMN_0619	dihydroxyacetone kinase	10775.7	9651.57	3775.43	9665.43	13173.4	5486.57	5683.86	7114.71	3025	8078.29	9431.86	3763.57	G
NWMN_0620	DAK2 domain-containing protein	10909	10459	5199	9540	13458	6988	6517	7486	4814	8445	9715	5017	G
NWMN_0621	hypothetical protein	6825	6609	3592	6091	8020	3968	4534	5291	3163	6046	7658	3701	S
NWMN_0622	hypothetical protein	4035	6234	1702	3918	4512	2294	3676	2970	1824	4027	4966	1670
NWMN_0623	hypothetical protein	2109	3053	1297	2248	3955	1703	2124	2175	1280	2272	2341	982.8	S
NWMN_0624	lipase/esterase LipA	1305	1378	260.2	1270	1616	286.9	767.1	755.8	268.9	952.8	781.5	167	I
NWMN_0625	hypothetical protein	1326	1947	693.8	722.9	1309	679.9	1198	904.7	619.5	1229	960.3	417.9
NWMN_0626	acetyltransferase	3214	5030	1031	2168	2889	969.4	2456	2680	1128	3064	2557	659.6	K
NWMN_0627	hypothetical protein	3530	4899	1708	2829	2898	1621	2651	2693	1924	5017	3588	1403	M
NWMN_0628	hypothetical protein	2502	3141	1322	1814	2288	1221	2242	1701	1399	2954	2146	998	T
NWMN_0629	sensor histidine kinase	1828	2092	993.8	1171	1506	951.6	1431	1257	1052	1997	1400	809.2	T
NWMN_0630	ABC transporter ATP-binding protein	4002	7349	1967	4340	6712	2959	1377	4520	1893	2711	4016	1162	V
NWMN_0631	ABC transporter permease	5086	8478	2985	3930	8768	3507	1424	5002	1935	2687	4130	1187	V
NWMN_0632	hypothetical protein	4868	4992	3291	3583	4684	4280	4513	2847	3447	4368	3309	2557	P
NWMN_0633	phosphate transporter	3670	3761	2293	3576	4171	2639	3734	2408	2113	3633	2714	1846	P
NWMN_0634	secretory antigen SsaA-like protein	7058	7577	2979	11030	11150	4593	5634	4262	1960	7002	3660	1214	M
NWMN_0635	membrane protein interacting with FtsH	2595	2982	1457	1962	2502	1281	1784	2324	1528	2523	2477	1006	R
NWMN_0636	AraC family transcription regulator	720.514	934.143	207.8	427.257	586.8	116.997	547.386	313.543	232.009	627.6	457.429	117.714	K
NWMN_0637	hypothetical protein	132.1	158.2	47.16	127.8	152.3	45.62	124.1	89.99	40.45	422.9	103.4	25.16	K
NWMN_0638	hypothetical protein	3952	6865	1906	5138	5143	2660	4958	3940	2233	7160	5384	2006	S
NWMN_0639	hypothetical protein	1268.33	1864.67	764.533	1369.67	1784.33	985.833	1670.67	1294	705.167	2056.33	1556.67	565.7	S
NWMN_0640	hypothetical protein	12694	21925	7562	12722	15885	9873	10024	10285	7163	14647	12812	5460	S
NWMN_0641	LysR family transcriptional regulator	7846	8715	3697	4716	5252	5255	6112	3688	4162	7821	5662	3864	K
NWMN_0642	major facilitator super superfamily	3048	2522	1225	1899	1960	1181	2291	1422	1125	2915	1891	1289	G
NWMN_0643	hypothetical protein	1190	1233	652.8	694.7	820.7	1039	1131	659.9	586.8	1157	810.3	710.1	S
NWMN_0644	hypothetical protein	3102	2983	793.7	2426	2507	837.3	1990	1768	777.4	2086	1517	345.7
NWMN_0645	hypothetical protein	1138	487.1	378.6	477.2	463.8	520	717.1	297.8	469.2	411.3	312.4	263.2	K
NWMN_0646	hypothetical protein	3680	3239	1267	2819	2698	1717	2406	1675	1580	3541	1901	869.4
NWMN_0647	hypothetical protein	5891	3814	3647	2298	3186	3212	6948	2533	4801	3117	3112	3052
NWMN_0648	acetyltransferase	2161	1599	255.1	445.3	1042	631.1	1867	296.5	703.4	678.8	604.3	478.9	J
NWMN_0649	hypothetical protein	5476	2003	2051	1338	1383	2283	7579	1304	2309	2235	1302	2175	R
NWMN_0650	hypothetical protein	10790.5	1987.5	4090	1627	1695.5	3233.5	11605.5	1802.5	5997.5	2359.5	1678.5	3888.5	S
NWMN_0651	hypothetical protein	23552	10981	22850	5646	9024	15040	25719	1805	23524	10547	11555	14733
NWMN_0652	undecaprenyl pyrophosphate phosphatase	2401	2371.14	1215.94	2704.71	3114.57	1627.71	2924.29	1728.43	1276.51	2732.43	2172.14	1136.43	V
NWMN_0653	ABC transporter ATP-binding MsbA	3365	3886	2122	2348	2742	2584	2860	2369	2075	3424	2749	1756	C
NWMN_0654	ABC transporter ATP-binding MsbA	2499	2294	1650	1691	2556	1995	2163	1785	1688	3060	2115	1423	C
NWMN_0655	MarR family regulatory protein	1818	2223	3659	1687	2720	2422	4829	3169	3398	1820	1715	1814	K
NWMN_0656	cobalamin synthesis protein P47K	2026	1474	1035	1018	1248	1031	1737	944.5	1218	1668	1112	804.3	R
NWMN_0657	oxidoreductase	5103	5100	1939	3976	4582	1741	4661	2935	1756	4966	3605	1306	R
NWMN_0658	hypothetical protein	3443	3847	1448	2466	2683	1592	2952	780.6	1408	73.99	2596	1105
NWMN_0659	anion transporter	3640	2869	1840	2113	2724	2817	2461	2044	2027	2698	2334	2360	P
NWMN_0660	hypothetical protein	4203	2263	2036	1585	1672	2244	4508	1548	1983	2602	1782	2389	L
NWMN_0661	hypothetical protein	635.5	692.6	332.7	429.7	661.6	406.4	486.2	412.4	366.8	782.1	467.1	247.5
NWMN_0662	hypothetical protein	2518.14	3711.71	1515.29	2084	3540.86	1764.86	2424.57	2306.57	1544.86	2399.29	2187.71	825.871	S
NWMN_0663	hypothetical protein	2006.86	2832.14	678.771	1498.86	2273.71	1110.86	1978.86	1470.29	1086.83	1193.06	1630.29	744.271	R
NWMN_0664	quinolone resistance norA protein	11437	9928	8042	8178	9669	11542	9943	7073	7993	8598	7155	6936	G
NWMN_0665	hypothetical protein	3885	4937.67	1568.33	4359.67	5135.33	1832.33	3693.33	3008	1199	4792.33	2562.33	744.133
NWMN_0666	ebsC protein	2663.5	2383.5	1206.9	1859.5	2367.5	1503.5	1704	1200.3	1183.15	2219.4	1951	1132.9	S
NWMN_0667	fructose operon transcriptional repressor	3889.14	3073.43	1439.29	2430.43	3835	2274	1866.57	2259.71	1635.29	2964.86	2905.86	1841.86	K
NWMN_0668	fructose 1-phosphate kinase	4744	4105	1885	2842	4646	3413	2729	2779	2211	3453	3519	2632	G
NWMN_0669	fructose specific permease	3756	3045	1999	2461	3869	3098	2667	2588	2196	3283	3445	2535	G
NWMN_0670	N-acetylglucosamine-6-phosphate deacetylase	1976	2532	642.1	2061	2374	653	2035	1276	453.8	1226	1707	402.8	G
NWMN_0671	hemolysin	5943	6388	3144	4513	5770	3675	4899	5159	2893	6129	4468	2169	R
NWMN_0672	aldo/keto reductase	26234	20282	20552	11361	12060	21383	27982	11004	21733	13837	14564	19432	R
NWMN_0673	glycosyl transferase group 2	11047	8808	9607	4714	5137	9049	15120	4561	8700	6319	5651	7039	M
NWMN_0674	sensor histidine kinase SaeS	65177	65170	65168	29381	53757	33153	63473	65180	65181	65169	65184	65181	T
NWMN_0675	response regulator	55627	65168	32668	13960	25790	15187	35282	51997	40506	59163	65184	51385	T
NWMN_0676	hypothetical protein	59854	65170	39454	18887	33518	19268	39119	59121	43416	65001	65188	55289	S
NWMN_0677	hypothetical protein	16429	22370	11774	7254	8961	3338	20788	25644	15712	26535	32065	17044
NWMN_0678	hypothetical protein	3432	2189	1710	1885	2373	2616	3239	1651	1766	2067	1452	1684
NWMN_0679	radical activating enzyme	6748	2893	3854	2924	2959	6261	5498	2142	3430	3291	2701	5019	O
NWMN_0680	6-pyruvoyl tetrahydropterin synthase (queuosine biosynthesis)	4255	1561	2350	1428	1654	4064	2906	1225	2554	1680	1433	3051	H
NWMN_0681	7-cyano-7-deazaguanine synthase (queuosine biosynthesis)	4165	1476	676.4	1416	1645	3430	2742	131.3	1991	17.55	237.7	2104	R
NWMN_0682	para-aminobenzoate synthase glutamine amidotransferase component II	5147	4911	1399	4168	3943	1555	4180	3091	1454	5915	3681	1251	E
NWMN_0683	anthranilate/para-aminobenzoate synthase component I	16709	16463	8324	11552	11818	8664	12221	9706	6398	19256	14380	6089	E
NWMN_0684	chorismate binding enzyme	18936	19515	11287	14376	15842	10602	12992	12323	9178	22829	17038	8346	E
NWMN_0685	hypothetical protein	7595	9243	4759	6543	6440	4409	6040	5833	4741	10805	8345	4406	E
NWMN_0686	hypothetical protein	15511	15186	2346	9918	10802	6517	9286	2352	6676	5355	11562	6840	E
NWMN_0687	sulfatase	26605	22791	13992	14307	16750	12358	22230	16850	12560	24174	22377	13883	M
NWMN_0688	ABC transporter ATP-binding protein	4904.5	6037.5	1932	3378	5112.5	2495	2994	3400.5	1730.5	3708.5	3355.5	1356.5	R
NWMN_0689	ATP-dependent DNA helicase RecQ	5528	7433	3672	3951	6163	4078	3590	4173	3234	4636	5527	2893	L
NWMN_0690	ABC transporter	8225	5849	3795	3517	4902	4693	7132	3556	3048	3207	3537	3186	E
NWMN_0691	amino acid ABC transporter permease protein	8542	5974	4355	3907	4704	5638	7489	3758	3045	3879	4009	3538	E
NWMN_0692	histidinol-phosphate aminotransferase HisC1	1206	1719	690.5	878.9	1386	684.2	896.4	838.2	477.1	709.1	1047	392.3	E
NWMN_0693	hypothetical protein	1191	1420	770.5	821.8	1394	1025	1140	983.8	752	1225	902.6	628.7	S
NWMN_0695	hypothetical protein	11712	4275	3514	2542	3985	6870	13333	423.3	6791	2471	3259	5362	I
NWMN_0696	di-/tripeptide ABC transporter	5511.29	4388.57	2328.14	4004.71	5437.14	3091.14	5769.43	3514.71	2278.71	5223.43	4349.57	2138.71	E
NWMN_0697	7-cyano-7-deazaguanine reductase	948.5	895.2	507.6	935.3	744.4	648.1	1116	569.7	463.3	1146	736.7	454.8	R
NWMN_0698	integral membrane domain-containing protein	1885	1501	308.1	0.01	1324	1103	1180	538.8	655.7	150.5	820.7	620.8	G
NWMN_0699	ribonucleotide reductase stimulatory protein	61516	56803	30679	42936	56223	46462	40274	40596	25924	40581	39843	20326	F
NWMN_0700	ribonucleotide-diphosphate reductase subunit alpha	50244	47498	31601	33052	35449	36638	37351	34266	27522	40506	37326	22405	F
NWMN_0701	ribonucleotide-diphosphate reductase subunit beta	25011.6	23645.7	18162.7	17525.7	20805	16312.4	22936.7	19365.4	15338.6	23940.6	23265.9	14239.6	F
NWMN_0702	ferrichrome ABC transporter permease	249.5	377.4	190.7	124.1	148.7	143.9	273	205.7	152.6	326.4	296.1	164.8	P
NWMN_0703	iron compound ABC transporter permease protein	117.5	194.3	73.96	84.79	105.8	92.75	78.69	93.72	87.22	162.8	122.6	97.76	P
NWMN_0704	ABC transporter ATP-binding protein	337.7	375.4	216.6	136	174.1	228	305.3	226.7	182	310.1	237.9	199.8	P
NWMN_0705	ferrichrome ABC transporter lipoprotein	439.4	681	391	334.2	540.2	523	323.2	394.3	318.3	395.4	532	340.8	P
NWMN_0706	hypothetical protein	5542	6532	2589	4937	6824	3232	3367	4557	2339	4868	5062	2189	S
NWMN_0707	UDP-N-acetylenolpyruvoylglucosamine reductase	3832.43	4416.43	1410.74	3755.14	4352.86	1734.23	2472.43	2702.86	1353.11	3346	3128.43	1211.37	M
NWMN_0708	hypothetical protein	605.4	465.1	225.1	555.1	417	202.2	446.5	306.3	246	618.8	359.9	209.7	S
NWMN_0709	hypothetical protein	2226	2949	1629	2055	2192	1342	2584	2419	1813	3881	2734	1857
NWMN_0710	hypothetical protein	5804	4607	3300	4201	3740	4300	5357	2734	3837	5102	4090	3584
NWMN_0711	glycerate kinase	1953	2103	1165	1598	1989	1728	2596	1110	993.5	2325	1639	1149	G
NWMN_0712	peptidase T	5429	7152	3195	4412	5698	3433	4230	4026	3003	5504	5200	2843	E
NWMN_0713	hypothetical protein	1451	1796	705.2	1279	1738	724.6	970.4	1123	599.6	1303	1502	623.2	S
NWMN_0714	hypothetical protein	636.714	915.857	219.643	638.314	716.771	222.534	461.486	448.171	207.514	547.229	526.714	184.111	S
NWMN_0715	GGDEF domain-containing protein	1388	2407	759.7	1265	1590	853.7	1531	1448	955.2	1924	1557	710.3	T
NWMN_0716	phospho-N-acetylmuramoyl-pentapeptide-transferase	4625	5322	2024	4325	4175	3016	3044	2801	2140	5470	4489	2160	M
NWMN_0717	hypothetical protein	3093	2675	1124	1695	2457	1201	2066	1361	990.6	1263	1876	959.4	S
NWMN_0718	degV	2938.75	2569.4	1223.53	2504.4	2671.75	1667.6	2987.93	1687.2	1361.03	3124.25	2005.92	1207.83	S
NWMN_0719	comf operon protein 1	308.829	180.757	118.114	105.031	142.186	142.029	602.129	75.9486	125.449	100.843	133.137	140.274	L
NWMN_0720	hypothetical protein	748.3	517.5	304.8	621.7	341.2	452.9	479.5	246.8	370.2	302.9	254.6	281.7	R
NWMN_0721	sigma 54 modulation protein	27106	34227	29093	24183	24912	19873	35369	23449	28421	29528	28812	26835	J
NWMN_0722	preprotein translocase subunit SecA	5385.86	8595.43	3257.29	3949.29	9585.43	4845.14	3907.71	5077.71	3054.57	4626.86	5109.57	2278.86	U
NWMN_0723	peptide chain release factor 2	3407.29	3918.57	706.257	3217.57	4130.57	1702.57	1980.57	599.914	954.014	1835	1906	686.257	J
NWMN_0724	secretory antigen SsaA-like protein	140.8	165.6	89.27	101.4	220.8	108.5	88.91	114.4	69.36	160.6	114.7	60.64	M
NWMN_0725	hypothetical protein	3057	4116	771.5	3523	3362	753.9	2568	2041	686.4	2818	2396	394.4	R
NWMN_0726	excinuclease ABC subunit B	4321.5	4089.5	1504	2988.5	3756	2037	2690.5	2629.5	1613	3958.5	3539.5	1796	L
NWMN_0727	excinuclease ABC subunit A	10492	6579	5044	5698	6785	8488	7558	4941	4962	6742	6109	6240	L
NWMN_0728	HPr kinase/phosphorylase	8537	10121	3027	7475	10071	4830	4730	6194	3643	7145	7557	3368	T
NWMN_0729	prolipoprotein diacylglyceryl transferase	11746	11117	4333	7515	11095	6202	6196	6437	4552	8061	7781	3758	M
NWMN_0730	acetyltransferase	4810	4687	2238	3179	4171	2433	3769	2949	2130	4115	3876	2132	R
NWMN_0731	TPR domain-containing protein	6781	6567	3068	4457	5489	3845	4153	4207	2493	5467	5871	3094	R
NWMN_0732	thioredoxin reductase	20925	29807	8113	13636	17146	11039	12315	16623	9015	20628	28187	11937	O
NWMN_0733	hypothetical protein	65178	64577	60907	49697	64655	65181	65156	55113	59966	56385	56670	64687	R
NWMN_0734	hypothetical protein	44394	27777	30704	22422	29946	43426	42991	27664	27410	32629	23131	34700	S
NWMN_0735	hypothetical protein	19951	17901	15679	12981	13683	18595	24691	14296	14487	17224	12853	17048	S
NWMN_0736	ATP-dependent Clp protease proteolytic subunit ClpP	2508	3928	2139	2063	3736	1509	3668	3011	2212	2358	2514	1242	O
NWMN_0737	hypothetical protein	19209	7455	11124	4896	7872	13568	16669	7727	11831	6445	7467	11019	R
NWMN_0738	hypothetical protein	65178	52817	36818	28118	50222	65179	50238	35034	40361	28898	27521	38405
NWMN_0740	glycolytic operon regulator	21438	12710	7760	15054	16636	17078	17234	11325	7004	11086	7615	6431	K
NWMN_0741	glyceraldehyde-3-phosphate dehydrogenase type I	26180	28449	13412	22873	22823	18717	20861	21919	10731	17433	19398	13844	G
NWMN_0742	phosphoglycerate kinase	39494	44833	9190	35298	35277	30259	24135	1955	17367	14717	26272	22512	G
NWMN_0743	triosephosphate isomerase	37167	38888	20959	29636	38736	37742	24705	32402	21200	25825	25183	22869	G
NWMN_0744	phosphoglyceromutase	43026	49131	25984	28882	45294	47898	28240	6018	23992	27890	31435	26895	G
NWMN_0745	enolase	17052	22713	14258	14186	17931	13805	19873	17601	11373	15362	18099	12348	G
NWMN_0746	hypothetical protein	7724	7881	4581	6115	6518	5150	7270	6176	5459	10226	7925	5091
NWMN_0747	preprotein translocase subunit SecG	17223	18609	7815	16644	2781	10884	17992	13974	10393	20633	16731	9218	U
NWMN_0748	carboxylesterase	5973	6389	2402	4470	6440	4112	3368	3641	2466	5666	4549	2721	R
NWMN_0749	ribonuclease R	9740	6008	5213	6524	6089	9498	9517	4511	3675	8551	5069	6119	K
NWMN_0750	SsrA-binding protein	7020	5456	4490	6336	6016	6566	8111	4027	3613	3468	4541	4912	O
NWMN_0751	hypothetical protein	426.7	439	182.7	412.5	409.3	275.9	310.7	288.5	207.6	469.1	366.2	205.9
NWMN_0752	hypothetical protein	2123	3073.5	1731.5	1236.5	1692.5	971.5	2971.5	2314.5	2115.5	2758	3002	1560
NWMN_0753	hypothetical protein	10734	17613	7655	6398	9358	4627	11551	10923	8868	10978	13753	6505
NWMN_0754	hypothetical protein	16393	6209	6951	3776	6254	14492	8332	4326	5402	3806	4164	5346
NWMN_0755	acetyltransferase	8095	3650	1329	2802	3416	6301	4988	2213	2351	764.3	2495	3706	R
NWMN_0756	clumping factor	29243	25439	28789	12592	17217	32382	35861	21565	29508	15197	12476	29327	M
NWMN_0757	secreted von Willebrand factor-binding protein VWbp	166.25	142.936	99.7971	78.4229	108.73	109.443	114.68	157.533	79.31	134.796	103.57	91.3657
NWMN_0758	extracellular matrix and plasma binding protein	1420	2190	1044	1033	1327	1040	1493	748.8	949.5	756	1964	1335
NWMN_0759	extracellular matrix and plasma binding like	1932	440.2	426.3	119.5	284	226.6	609.3	183.9	131.4	187.7	172.5	263.3
NWMN_0760	staphylococcal nuclease	16024	29150	23998	7727	14933	5690	22717	21329	15980	19156	24944	11097	L
NWMN_0761	cold-shock protein CSD	2761	5576	3736	3066	3579	2407	5178	3924	3910	4328	4294	2396	K
NWMN_0762	hypothetical protein	2417.71	2009.71	3623.29	966.943	1565.43	3246.86	2645.86	1566.71	3848	1671.86	1780.57	2592.57
NWMN_0763	hypothetical protein	2344	1753	3035	1060	4.988	2163	2450	1726	2772	2007	1994	1830
NWMN_0764	hypothetical protein	748.1	1047	305.2	739.2	867	352.1	584.8	546.4	289.6	1207	610.3	213.4
NWMN_0765	hypothetical protein	669.1	593.6	377.1	228.5	372.5	490.7	554.6	315.8	362.7	405.4	336.3	429.7
NWMN_0766	hypothetical protein	8763	4463	3727	2376	3616	8119	4083	3335	9769	5154	4976	8462
NWMN_0768	phosphoglycerate mutase	168.2	211.7	140.3	135	156.6	125.4	222.3	230.8	199.5	302.6	261.1	186.8	G
NWMN_0769	LysE/YggA	5465	7688	3353	6330	6590	2765	6338	5380	4205	6918	5924	2739	R
NWMN_0770	hypothetical protein	20942	26312	11634	20406	26245	20285	14022	16656	12727	19148	18033	9090	K
NWMN_0771	OsmC-like protein	4694	2515	2444	4019	3856	3756	6494	2695	2324	2773	2174	1763	O
NWMN_0772	3-dehydroquinate dehydratase	1368	2225	731.8	1561	1926	883.6	1273	1186	659.2	2211	1636	556.2	E
NWMN_0773	nitroreductase	3931	5502	2075	2912	4371	2720	3372	3095	2448	4818	4051	2226	C
NWMN_0774	thioredoxin	3800	6969	1525	3263	5342	1425	4448	2353	1804	1550	4270	1016	O
NWMN_0775	hypothetical protein	14887	20266	9215	12331	13648	6842	15597	13917	8917	17226	17375	7425	P
NWMN_0776	glycine cleavage system protein H	3620	6118	3708	4104	4535	4290	5761	4493	3966	4861	4774	2918	E
NWMN_0777	hypothetical protein	1034	2110	871	883.9	1426	987.5	878.2	879.4	603.3	937.7	802.9	436.9	S
NWMN_0778	hypothetical protein	5399	3421	5242	3367	3693	5793	7630	4177	5694	4817	3161	5003	L
NWMN_0779	hypothetical protein	4478	2769	3989	2274	2577	4788	5510	2435	3939	3198	2208	3697	O
NWMN_0780	ABC transporter ATP-binding protein	6068	4501	1761	3051	5239	3174	3348	2931	1618	2475	3400	1772	P
NWMN_0781	ABC transporter permease protein	8668	9711	5506	4494	7292	6910	4469	6287	3503	7326	7089	3773	P
NWMN_0782	ABC transporter substrate-binding protein	5315	6792	4244.5	3210	5703.5	3993.5	3849	3523.48	4095	3912.14	5102	3211.5	P
NWMN_0784	hypothetical protein	2434	1611.5	1435	817.3	1315.4	1496.5	1435.8	1155.15	1282.4	1065.65	1040.35	835.35	S
NWMN_0785	ABC transporter ATP-binding protein	37996	27772	25138	19136	22327	27350	37319	24874	21056	24015	19444	21857	O
NWMN_0786	FeS assembly protein SufD	38425.4	25564.4	25085.7	16555.7	16559.4	23630.3	32192.3	18390	16681.6	22051.7	17304.6	21388	O
NWMN_0787	aminotransferase	12059.3	12248.4	9493.71	7595.14	8510	10374.1	11060.7	10780.6	7344.57	12457.7	7109.29	10034	E
NWMN_0788	nitrogen fixation protein NifU-like protein	20607	23914	16148	16422	16735	17291	18109	19878	14134	23255	14085	18859	C
NWMN_0789	FeS assembly protein SufB	22440.5	20361	12956	10564.5	15022	11080	11026.5	13439.5	8825.5	14142	9596	11292.5	O
NWMN_0790	hypothetical protein	533	575.8	267.8	435.9	533.9	293.9	555.1	669.7	300.1	535.3	392.3	176.9
NWMN_0791	CBS domain-containing protein	23953.7	10967.6	13681.7	6308.43	10658.7	18886.1	15540.6	7433.14	14123.4	6317.57	7012.57	11226.4	P
NWMN_0792	hypothetical protein	16744	8505	5096	4763	6992	4349	13317	4874	5245	3812	4272	3346	R
NWMN_0793	hypothetical protein	2510	1929	687.3	1963	2018	737.2	1862	1045	692	2001	1249	538.2	S
NWMN_0794	hypothetical protein	1641.71	1620.29	737.114	1491.14	1477.43	797.686	1680.57	853.829	670.729	1927.29	1289	710.857	R
NWMN_0795	5-nucleotidase	2479	2601	1446	1719	2165	1182	2034	1514	1063	2699	2011	1314	F
NWMN_0796	lipoyl synthase	4942	4853	2998	3616	4843	3529	4840	4038	3283	5054	4409	2893	H
NWMN_0797	hypothetical protein	621.9	692.8	344.2	464.6	700.6	339.2	553.1	503.4	333.3	683.9	479.8	264.2	S
NWMN_0798	hypothetical protein	703.75	1023.4	308.35	679.35	1013.15	331.6	563	629.65	332.15	569.25	673.5	192.5
NWMN_0799	hypothetical protein	6572.8	10117.2	2998.6	4986.8	7559.2	1966	6236.6	6123	3225.8	7125.6	6960.4	2137.6	S
NWMN_0800	hydrolase	9754	14482	4478	6538	10887	3333	9856	8173	4716	8892	8999	3180	G
NWMN_0801	D-isomer specific 2-hydroxyacid dehydrogenase NAD binding domain-containing protein	3091	3652.57	1527.71	1471.29	3198.43	1114.17	2671.43	1483.57	1378.29	1049.54	2124.29	821.486	C
NWMN_0802	hypothetical protein	22310	36916	6129	23747	40839	7422	7691	17918	3445	13440	16125	2511
NWMN_0803	D-alanine--D-alanyl carrier protein ligase	13645.4	26544.4	8299.14	12982.1	27480.1	9691	5693.43	16174.6	6181.43	10607.7	15125.1	3725	Q
NWMN_0804	dltB protein	14622	23878	10141	10310	24076	12106	5673	15728	8886	8760	16201	4953	M
NWMN_0805	D-alanine--poly(phosphoribitol) ligase subunit 2	16983	27574	12186	12846	26218	14430	6880	15754	11091	11875	19495	6678	I
NWMN_0806	poly D-alanine transfer protein	8725.67	15591.3	5832.67	6143	15507	9390	3985.33	8413.33	6038	5638.33	10144.3	3618	M
NWMN_0807	NifU domain-containing protein	2103	3618	1173	2386	77.2	1069	2651	2581	1310	2933	2502	708.5	O
NWMN_0808	hypothetical protein	714.8	1198	538	728.9	927	462.2	1001	939	774.4	1365	1043	555	S
NWMN_0809	hypothetical protein	3809.43	5787.29	3395.71	3046	5482.43	3146.57	4381.14	4076.57	3052.29	3722.43	4209.71	2717.71	C
NWMN_0810	hypothetical protein	3005	5800	1739	3328	4050	1623	3265	3256	1659	4879	3857	1175	S
NWMN_0811	NADH dehydrogenase	13236	9620	8512	9994	11851	11846	15004	6773	8640	9736	8747	8951	C
NWMN_0812	cytosol aminopeptidase	1126	2110	888.9	1082	1371	766.7	1272	1210	943.2	1573	1576	776	E
NWMN_0813	NhaC family sodium:proton (Na+:H+) antiporter	1466	1547	1230	518.3	1976	1908	374.4	1481	945.1	1023	1524	975.1	R
NWMN_0814	two-component response regulator/competence factor transporting ATP-binding/permease protein	1897	2415	1265	974.9	2568	1841	932.6	1380	1059	1485	2088	1046	Q
NWMN_0815	hypothetical protein	158.1	245.2	96.84	105.2	145.2	81.64	86.99	120.5	106	151.1	153.3	77.32	P
NWMN_0816	CPA3 family monovalent cation:proton (H+) antiporter-3 subunit G (mnhG2)	4306	4144	3446	2530	3846	3708	4622	3022	3569	3726	4073	3238	P
NWMN_0817	CPA3 family monovalent cation:proton (H+) antiporter-3 subunit F (mnhF2)	2461	1905	1992	1392	1899	1907	2541	1845	1696	2175	2206	1841	P
NWMN_0818	monovalent cation/H+ antiporter subunit E	8838	8354	5768	5432	8538	6491	8240	5712	6133	7450	8164	5707	P
NWMN_0819	CPA3 family monovalent cation:proton (H+) antiporter-3 subunit D (mnhD2)	11103	9421	6127	6254	9575	7577	7260	6489	5958	8016	9207	5644	C
NWMN_0820	CPA3 family monovalent cation:proton (H+) antiporter-3 subunit C (mnhC2)	20344.5	20257	11614	11005	20607.5	16085	11288	12936.5	11409	14931.5	16376.5	10218.5	P
NWMN_0821	monovalent cation/H+ antiporter subunit B	30143	29115	15384	18409	30074	22743	16017	10171	15578	13571	24827	15457	P
NWMN_0822	monovalent cation/H+ antiporter subunit A	15778.7	15715.4	7601.71	10398.1	17362.1	11473	8247.57	10662.6	7683.43	11517	13074	6949.86	C
NWMN_0823	hypothetical protein	6293	6516	2371	5078	6429	2557	3627	3390	2452	4580	4368	1679
NWMN_0824	peptidyl-prolyl cis-trans isomerase cyclophilin-type	2949	4327	1816	3262	3119	1587	3473	2506	1671	3967	2620	1012	O
NWMN_0825	general stress protein 13	2647	3655	1860	2096	3021	2244	3845	2548	2600	3653	3151	1891	J
NWMN_0826	FMN oxidoreductase	3023	7806	1607	3380	6219	1821	2738	4457	1251	3541	4257	845.6	C
NWMN_0827	ornithine--oxo-acid transaminase	33607.4	43497	18143.1	30163.6	37528.1	23491	20982.4	25165.9	15764.4	27413.4	32892.6	16990.7	E
NWMN_0828	glutamate dehydrogenase NAD-specific	26072.7	33808.6	17753	24521	31388.4	21755.9	22165.6	24477	18897.3	26019.6	28224.7	17390.7	E
NWMN_0830	glycerophosphoryl diester phosphodiesterase	2446.14	2279.29	691.7	3683	4607.14	1271.29	1249.29	1186.57	472.729	1750	1280	365.9	C
NWMN_0831	argininosuccinate lyase	255.1	181.6	198.3	112.1	190.1	256.7	195.8	155.7	180.5	235.7	179.4	165.8	E
NWMN_0832	argininosuccinate synthase	413.9	405.2	218.7	308	416	367.3	321.6	267	247	349.3	379.7	254.2	E
NWMN_0833	glucose-6-phosphate isomerase	14275	22263	7844	13312	16326	7380	16273	8141	6760	8784	15347	4704	G
NWMN_0834	hypothetical protein	1518	1982	882.4	1847	2252	1262	1198	1270	986.2	1930	1731	632.8	S
NWMN_0835	Signal peptidase IA	2249	2624	1100	2540	3273	1746	1857	785.8	1131	1633	2366	995.6	U
NWMN_0836	Signal peptidase IB	1590	2224	933.2	2002	2463	1589	1742	1384	1206	2398	1896	865.6	U
NWMN_0837	exonuclease RexB	5283.14	7059	3165.71	4189.71	5982.86	3899.71	3377.29	2904.86	2949.29	4741.14	5063.14	2565	L
NWMN_0838	ATP-dependent nuclease subunit A	5428	6144	3623	3363	5946	4582	3903	3892	3770	5398	5196	3739	L
NWMN_0839	fumarylacetoacetate hydrolase	17542	26911	12862	15482	23966	12721	19252	19944	13043	16459	21187	10124	Q
NWMN_0840	hypothetical protein	929.3	644.2	425.3	433.3	642.7	811.9	957	410.9	484.4	592.5	388.1	322.2
NWMN_0841	coenzyme A disulfide reductase	11356	17341	6062	7151	14888	5769	7925	12534	5625	9841	12135	4277	R
NWMN_0842	HAD superfamily hydrolase	6386.5	9664	1927.5	6058.5	8584	3488	4337.5	4097	1948	3651.5	5490.5	1458	R
NWMN_0843	hypothetical protein	42728	64289	26370	42260	61771	28508	35268	41988	25595	48948	58711	21680	R
NWMN_0844	hypothetical protein	183.8	189.1	83.92	111.9	170.5	83.8	202.8	105.7	67.19	251.3	144.8	57.12	I
NWMN_0845	ATP-dependent Clp protease ATP-binding subunit ClpB	4732	1768	2382	1070	1402	3725	3368	1447	3083	1956	1611	2272	O
NWMN_0846	LysR family regulatory protein	580.086	1719	116.769	263.886	402.043	87.92	475.171	407.809	172.443	333.385	503.343	75.7571	K
NWMN_0847	2-isopropylmalate synthase	185.2	200.6	116.7	107.9	152.1	71.9	118.7	106.1	78.8	110	115.5	109.5	E
NWMN_0848	Sua5/YciO/YrdC/YwlC	256.243	219.286	63.7629	153.043	163.229	81.8029	159.5	189.257	65.5886	155.7	127.929	52.9229	J
NWMN_0849	hypothetical protein	956.957	1151.57	355.2	795.586	728.6	243.929	657.014	471.4	330.686	704.314	556.014	173.586	G
NWMN_0850	hypothetical protein	1066	1309	395	636.8	802.4	234.5	983	699.3	421.9	972	929.9	263.3	R
NWMN_0851	MHC class II analog protein	4275	7834	2932	6673	8489	6614	7664	10776	6738	7419	12021	5794	R
NWMN_0852	hypothetical protein	503.6	632.7	279.3	346.9	636.7	283.6	345.4	420.8	344.4	420.3	504.4	271.1
NWMN_0853	3-oxoacyl-(acyl carrier protein) synthase III	5063	4848	1545	4062	5561	2387	2887	4176	1240	4221	4040	1207	I
NWMN_0854	3-oxoacyl- synthase	6357	6868	2234	5852	9673	3647	4488	5781	2510	6310	6564	2252	I
NWMN_0855	hypothetical protein	568.6	719.8	237.2	616.2	610.7	240.3	511.6	396.9	242.1	683.4	507.4	153.8
NWMN_0856	oligopeptide transport system permease protein	17672.4	21921.7	5486.43	13870	19867.4	6026.14	9146.86	10783	4178.57	12815.4	12105	2664.14	E
NWMN_0857	oligopeptide ABC transporter permease protein	24823	24799	10285	15111	23310	13443	8699	13687	7905	15465	15387	6023	E
NWMN_0858	oligopeptide transport ATP-binding protein	21809.1	17863.1	5865	10705.1	18257.9	11410.3	7476.86	7731.57	8087.86	6709.57	10510	6579.29	E
NWMN_0859	oligopeptide ABC transporter ATP-binding protein	49715	40466	20802	19296	37632	32465	18806	21405	20380	24224	25280	15882	E
NWMN_0860	oligopeptide ABC transporter substrate-binding protein	32003	23649	15019	12295	24458	20119	15344	14606	14547	16238	18034	11896	E
NWMN_0861	oligopeptide ABC transporter substrate-binding protein	158.5	159	27.66	25.99	135.7	105.2	32.12	76.91	87.87	0.01	48.64	59.41	E
NWMN_0862	oligopeptide ABC transporter ATP-binding protein	132.1	109.4	105.5	90.01	102.6	113.9	67.89	76.96	88.94	76.48	87.15	68.91	E
NWMN_0863	oligopeptide ABC transporter ATP-binding protein	414.9	223.7	214.2	220.7	254.4	278.5	242.7	156.1	153.4	216.9	167.6	177.3	E
NWMN_0864	oligopeptide ABC transporter permease protein	276.7	235.1	152.6	199.1	242.9	263.6	241.7	170.1	112.9	206.9	178	139.7	E
NWMN_0865	oligopeptide ABC transporter permease protein	538.514	671.029	390.786	468.714	615.657	506.686	403.7	546.843	290.886	569.343	481.214	303.757	E
NWMN_0866	tryptophanyl-tRNA synthetase	7610	10911	2800	8232	7778	2888	9664	5738	2399	9207	6192	1545	J
NWMN_0867	transcriptional regulator Spx	3555	4177	6698	7025	2827	3048	12280	6053	6806	7283	9983	10262	P
NWMN_0868	adaptor protein	9929	16799	2154	7791	11114	5310	7986	7932	5772	1746	8464	5528	O
NWMN_0869	competence protein	209.1	250.9	61.19	177.3	188.2	83.17	143.9	140.2	60.13	198.9	141.6	47.45	R
NWMN_0870	oligoendopeptidase F	13051	30984	1151	12733	16809	1577	11878	28.02	2946	8299	15672	1275	E
NWMN_0872	hypothetical protein	5910	9111	3629	5709	7204	3795	4795	5084	2834	6632	4680	1857	Q
NWMN_0873	hypothetical protein	9930	13386	5972	9021	10513	6182	7723	7573	5157	10213	7453	3266	R
NWMN_0874	hypothetical protein	3035	4928	2081	3411	3587	1622	2886	2791	2093	3909	2911	1189	S
NWMN_0875	hypothetical protein	8577	10559	2550	8447	9196	3779	5262	4751	2448	7522	5171	1778
NWMN_0876	GTP pyrophosphokinase	8172	9491	1078	6286	7236	3633	4485	167	2354	1266	4632	2123	S
NWMN_0877	inorganic polyphosphate/ATP-NAD kinase	7058	8981.5	3715	5790.5	6692.5	3916.5	5461	4471.5	3172.5	5842	6174.5	2967	G
NWMN_0878	RNA pseudouridylate synthase	2412	2747	1002	1678	2501	1238	1282	821.1	946.9	39.14	2023	960.8	J
NWMN_0879	magnesium transporter	5761	6833	2869.5	4226.5	5838.5	3554.5	3252	3710	2709	5545	5336	2639	P
NWMN_0880	monovalent cation/H+ antiporter-2 (CPA2)	6103	6750	3136	4270	6668	4238	3666	3984	2752	5499	6219	3122	P
NWMN_0881	enoyl-(acyl carrier protein) reductase	13860	18844	7645	13046	14766	9424	12498	8624	7226	13960	14292	6077	I
NWMN_0882	hypothetical protein	5898.5	6551	2597	5363.5	4896	2060	6347.5	4135.5	2278.5	7110.5	4603.5	1634.75	R
NWMN_0883	Na+/alanine symporter	731.6	925.9	271.7	593.2	1025	392.4	398.7	442	171.3	547.8	533.7	127.4	E
NWMN_0884	hypothetical protein	942.7	1261	480.4	741	823.3	563.4	703.8	622.7	428.6	1181	749.7	329.5	P
NWMN_0885	hypothetical protein	14628	26720	10630	11814	15270	11689	17774	12546	12713	17769	14761	8472	J
NWMN_0886	hypothetical protein	1183.5	1694.5	778.65	904.2	1475	756.95	1051.5	990.45	680.2	1188	1077	489.95	G
NWMN_0887	diacylglycerol glucosyltransferase	3531.33	4999	1606.67	3166	3321.33	1482	2969.33	2350.67	1605	3439.67	2355.33	877.533	M
NWMN_0888	UDP-N-acetylmuramoylalanyl-D-glutamate--2 6-diaminopimelate ligase	5816	6493	2468	5013	6181	3454	3729	3165	1917	5314	4444	1834	M
NWMN_0889	hypothetical protein	4098	5587	2716	3820	5921	3911	3143	3218	2358	4454	4028	1792
NWMN_0890	peptide chain release factor 3	448.4	615.3	345	317.8	551.8	360.3	567.8	451.4	369.6	598.8	505.2	288.3	J
NWMN_0891	hypothetical protein	1300	1472	595.2	1146	1468	611.5	959.1	1149	546.1	1097	1511	524.3	P
NWMN_0892	serine protease HtrA	2903	2181	1663	1325	1644	640.6	1482	1016	591.9	990.6	896.8	869.9	O
NWMN_0893	Na+ transporting ATP synthase	396.3	442.3	253.9	351.5	691.7	380.5	354.5	367.5	282.1	474.3	425.5	226.5	P
NWMN_0894	5' nucleotidase	3227	4661	1469	2714	3051	1383	2410	2317	1318	4101	2697	1074	F
NWMN_0895	competence transcription factor ComK-like protein	5822	20010	6843	718.1	2450	1446	2812	11126	8416	4723	13040	6496	K
NWMN_0896	hypothetical protein	20028	23748	12179	21000	21687	28223	23498	21640	20483	35763	26834	19232
NWMN_0897	lipoyltransferase and lipoate-protein ligase	2848.67	6350.33	931.6	3336.67	4713.67	665.6	2826.33	2825.67	889.667	3965.33	4433.67	678.933	H
NWMN_0899	protease	931.843	1287	497.957	754.786	1456.29	787.271	945.686	808.157	628.729	1027.14	911.871	461.857	R
NWMN_0900	hypothetical protein	197.1	428.7	43.33	161.5	254.5	50.65	237.7	9.053	52.82	77.31	141.7	29.13
NWMN_0901	membrane protein	355.4	587.3	123.8	262	340.1	79.28	285	197.4	111.8	209.9	261.8	119.7	J
NWMN_0902	hypothetical protein	407.643	370.914	230.829	179.443	237.171	243.571	338.886	188.629	230.029	225.129	176.886	167.957	S
NWMN_0903	ABC transporter ATP-binding protein	721.6	524	317.7	309.1	575.8	435.7	377.2	129.9	312	330.6	381	286.3	V
NWMN_0904	hypothetical protein	3113	4172	2294	2080	3565	4523	3560	2232	2946	2450	3585	3282
NWMN_0905	hypothetical protein	1730	2084	447.9	1479	1077	242.7	2528	1674	858.7	3139	1953	372.8
NWMN_0906	glycosyl transferase group 1	1237.8	1424.4	436.633	879.067	852.133	267.433	1496.13	1155.13	471.3	1988.87	1207.2	336.9	M
NWMN_0907	hypothetical protein	1065	1222	218.2	928.8	1216	241.7	976.7	644.1	395.6	767.1	1078	300.1	S
NWMN_0908	iron compound ABC transporter iron compound-binding protein	1051	1850	233.8	274.7	379.7	223	965.7	1019	760	1370	2360	978.7	P
NWMN_0909	hypothetical protein	1740	2302	849.4	1181	1965	1096	1246	1161	849.2	1549	1292	728.8	S
NWMN_0910	acetyltransferase	3456	7160	2383	4370	5588	2491	3608	3827	2356	3384	3402	1673	K
NWMN_0911	1,4-dihydroxy-2-naphthoate octaprenyltransferase	4576.2	4189.8	1929.8	3863.6	4783.8	3074.8	4050.6	2738.8	1814.2	5053.2	3595	1787	H
NWMN_0912	hypothetical protein	6583	8892	2706	5373	6829	3358	4759	244.8	2699	4798	4501	1957	H
NWMN_0913	2-succinyl-6-hydroxy-2,4-cyclohexadiene-1-carboxylic acid synthase/2-oxoglutarate decarboxylase	17043	9940	8032	7909	9951	11659	11635	8718	6330	9492	7462	7254	H
NWMN_0914	alpha/beta fold family hydrolase	16649	17711	13091	11813	14515	15232	17471	11753	10308	14497	11310	11338	R
NWMN_0915	naphthoate synthase	3898.5	5209	3908.5	3657	4455.5	3477	6496.5	3885.5	3624.5	4945.5	4343.5	3471.5	H
NWMN_0916	cysteine protease	3075	4915	3351	1531	2718	3564	3387	6464	7611	3623	7890	7926
NWMN_0917	cysteine protease	2460	3897	2637	1059	407.7	2460	2509	5733	5910	2644	6460	4567
NWMN_0918	glutamyl endopeptidase	2653.8	4831	2368.4	1236.88	2756	2348.4	2282.8	6499	6145.6	2046.2	8444.4	6170.6	E
NWMN_0919	aminotransferase class I	1893	3742	1034	1433	2485	1311	1591	2205	1022	2260	2269	647	E
NWMN_0920	hypothetical protein	991.9	1443	409	980.9	1153	573.1	720.4	983.6	490.2	986	940.4	320.9	G
NWMN_0921	MarR family transcriptional regulator	2977.5	5048	2373.5	1177	1782.5	1063.35	2081.1	2535.5	2122.35	3347	3253.5	1456	K
NWMN_0922	bifunctional autolysin	19175.5	24793	13879	17217.5	32631	21426.5	10255	12506.5	9689	10502	13155	9125	G
NWMN_0923	acetyltransferase GNAT	1932	2091	540	1463	2638	864.1	821.5	1242	504.3	1190	1233	343.2	K
NWMN_0924	hypothetical protein	2189	3370	1626	1782	3124	2000	2098	2327	1606	2634	2838	1218	R
NWMN_0925	hypothetical protein	4456.43	7263.71	2170	3845	5791.14	2655.71	3415.29	3356.71	1900.86	4696.86	4974.71	1651	K
NWMN_0926	fmt protein	2035	1758	546.4	1570	1280	902.9	2103	1020	1095	1662	1560	1266	V
NWMN_0927	quinol oxidase subunit IV	3139	2286	3110	2578	3967	3471	5368	1999	2649	2348	2060	2422	C
NWMN_0928	cytochrome c oxidase subunit III	54395.5	34434	43021.5	40838	47076	48968	64154	33681.5	35626.5	40755	30505	34769	C
NWMN_0929	quinol oxidase subunit I	65177	65151	64286	65182	65180	65178	65153	60029	49789	65173	65173	65174	C
NWMN_0930	quinol oxidase AA3 subunit II	65176.5	63447.5	57727.5	63372	65178.5	65180	65149	53722.5	56632	61595.5	57990.5	61952.5	C
NWMN_0931	hypothetical protein	15791	21514	8734	13759	16535	9622	19334	14728	16334	23027	22839	12679
NWMN_0932	FolD bifunctional protein	13564	9259	11618	12530	14381	8408	18929	13689	10860	15784	18326	9948	H
NWMN_0933	phosphoribosylaminoimidazole carboxylase catalytic subunit	3771.5	4616.5	1874.5	3757.5	5417	3384	2161.5	2355.5	1403	3125.5	2334.5	1051.55	F
NWMN_0934	phosphoribosylaminoimidazole carboxylase ATPase subunit	4685	5742	2273	4253	6264	3873	2631	2716	1703	3569	2759	1259	F
NWMN_0935	phosphoribosylaminoimidazole-succinocarboxamide synthase	4070	5602	2463	4423	5773	3505	2971	3061	1909	3519	3273	1553	F
NWMN_0936	phosphoribosylformylglycinamidine synthase I	2409	2484	1186.86	1649.29	2604.86	1379.86	1433.29	1421.71	916.343	1654.86	1589	842.1	F
NWMN_0937	phosphoribosylformylglycinamidine synthase II	3956	3021	1901	2475	4341	3096	2534	2451	1840	2590	2367	1778	F
NWMN_0938	amidophosphoribosyltransferase	2625	2151	1690	1828	3057	2484	1764	1682	1498	2034	2098	1588	F
NWMN_0939	phosphoribosylaminoimidazole synthetase	3028.5	3125.5	2115.5	1869	3173	2938.5	2006	1891	1633	2276.5	2325.5	1819.5	F
NWMN_0940	phosphoribosylglycinamide formyltransferase	7638	7199	4739	4029	6923	7153	4338	3973	3877	4958	4385	3992	F
NWMN_0941	bifunctional phosphoribosylaminoimidazolecarboxamide formyltransferase/IMP cyclohydrolase	5787.29	5290.57	2349	3107.57	5055.29	4856.86	3419.86	1798.46	2590	2220.43	3263.43	3063.29	F
NWMN_0942	phosphoribosylamine--glycine ligase	2233	1934	1682	1479	2591	1977	2473	1566	1454	1982	1803	1319	F
NWMN_0943	cobalt transport	10289	11692	2720	4233	8459	3550	4685	171.4	3341	51.64	8604	3792	P
NWMN_0944	hypothetical protein	44444	39951	20650	23070	32707	21302	25376	29703	20078	42464	43327	26673	P
NWMN_0945	hypothetical protein	29548	33616	12769	16835	23948	9839	20002	20385	14003	32938	34807	17547	S
NWMN_0946	hypothetical protein	4458	2851	2765	1738	2756	3025	4366	2878	2894	3257	1966	1958
NWMN_0947	hypothetical protein	7171.14	8864	3496.29	6314.14	7026.29	4145.71	5016	4604.86	2899.86	8536.29	6144	2848.71	R
NWMN_0948	hypothetical protein	14088	8190	8455	6534	7260	8720	17703	6469	7781	9727	5662	6942
NWMN_0949	phosphocarrier protein HPr	24304.5	27183.5	25382.5	23143	20962.5	19712	40574.5	22954	22774	27875	25966	21774.5	G
NWMN_0950	phosphoenolpyruvate-protein phosphotransferase	14266	15705	12783	11095	12735	12292	20115	12166	11819	14704	11167	9128	G
NWMN_0951	glutaredoxin	299.9	419.2	138.75	294	387.25	170.6	309.8	247.9	202.5	387.75	309.55	109.1	O
NWMN_0952	cytochrome d ubiquinol oxidase subunit I	3014	1152	1238	1755	2298	2988	1300	1245	1194	1391	1605	1352	C
NWMN_0953	cytochrome d ubiquinol oxidase subunit II	2511	1049	1294	1577	1942	2742	1680	973	1096	1190	1449	1330	C
NWMN_0954	TrkA potassium uptake	17378	13215.5	8571.5	11169	12806.5	13252.5	12065.5	5308	8668.5	11360.5	9531	8159	P
NWMN_0956	hypothetical protein	15863.5	21912.5	6855.5	12049.5	16486.5	5950.5	13418	14285.5	6810.5	16615	16451.5	5727	R
NWMN_0957	peptide deformylase	834.55	1298.65	405.2	902.05	1458	382.45	959.2	1131.15	428.85	1032.25	1016.1	310.4	J
NWMN_0958	hypothetical protein	3818	6656	1417	5332	5799	1781	4015	3794	1779	5285	4810	1304
NWMN_0959	pyruvate dehydrogenase complex E1 component alpha subunit	35006	33276.1	17282.6	24727.6	34274.9	23645.3	21733.3	23723.7	15494.1	25694.9	26958.7	20151.6	C
NWMN_0960	pyruvate dehydrogenase complex E1 component pyruvate dehydrogenase beta subunit	65176	64453	37443	50082	65179	47750	40575	32291	27786	15359	56021	35264	C
NWMN_0961	branched-chain alpha-keto acid dehydrogenase subunit E2	47635	47007	10752	40139	43658	29452	35169	15243	21490	14994	42487	28612	C
NWMN_0962	dihydrolipoamide dehydrogenase	18070	18933	14509	11994	18238	14318	19066	15857	12813	15464	16544	12181	C
NWMN_0963	hypothetical protein	2258	2343	925.9	1730	2610	1528	1721	1606	1303	2604	2160	1193	S
NWMN_0964	Cro/CI family transcriptional regulator	804.2	761	207.8	608.5	323	194.5	653.1	336.9	207.4	1273	580.8	312.5	K
NWMN_0965	ABC transporter	842.8	546.1	125.2	18.46	372	258.1	726.2	174.4	276.1	40.71	252	394.7	E
NWMN_0966	spermidine/putrescine ABC transporter permease protein	1177	690.8	455.7	632.5	545.2	468.4	910.4	461	459.2	1379	900.3	649.2	E
NWMN_0967	spermidine/putrescine ABC transporter permease protein	1105	634.4	497.7	588.8	551.3	567.6	798.7	510.5	516.8	1339	837.7	743.4	E
NWMN_0968	spermidine/putrescine ABC transporter spermidine/putrescine-binding protein	3412	1334	1703	1087	1375	2311	2201	1253	1760	2416	1715	1874	E
NWMN_0969	hypothetical protein	45104.1	48261.7	46825.9	32790.1	43069.1	43731.4	47139.1	46068.4	49649.4	46007.9	49078.7	51850.3
NWMN_0970	hypothetical protein	3726	6369	2461	3764	4634	2206	3670	4037	3252	4985	5086	1839
NWMN_0971	Mn2+/Fe2+ transporter NRAMP	19479	19296	4514	16886	15276	5564	14143	12721	5474	24855	11127	3119	P
NWMN_0972	hypothetical protein	6281.14	11836.6	1669.57	4932.29	5447.14	849.143	5711.29	4893.57	1592.14	6566.86	7132	952.171	S
NWMN_0973	inositol monophosphatase	17100.4	20143.3	9958	12620.1	19009.4	16651	11199.9	11491.9	9763.86	17592	14361.7	10285.4	G
NWMN_0974	GTP-binding protein TypA	886.1	845	359	636.2	670.5	362.2	766.3	497.7	320.7	1076	729.2	285.5	T
NWMN_0975	hypothetical protein	1488.29	2366	840.357	1219.24	1893.86	1104.57	1654.86	1405.29	1056.26	1921.14	1635.43	717.814	S
NWMN_0976	hypothetical protein	1490.62	2463.12	731.225	1284.28	1932.75	916.462	1757.12	607.862	843.05	874.2	1547	550.65
NWMN_0977	hypothetical protein	3130.29	3559.71	2334.86	3538	3028.86	1755.43	6534.86	3862	3153.43	4984.29	4032.71	2087.29	S
NWMN_0978	cell division protein	4784	7207	1919	4071	5101	1625	4068	3942	2098	5301	4668	1248	D
NWMN_0979	pyruvate carboxylase	7996.43	10775.6	5558.71	6468	12039.3	5844.43	4796.14	6445.29	4968.86	6405	8440.43	3942.43	C
NWMN_0980	heme A synthase	2660	1518	1385	2320	2333	1764	2648	1442	1514	2525	1534	1128	O
NWMN_0981	protoheme IX farnesyltransferase	13073	7484	4528	6416	8572	5512	7159	6615	4294	8425	6414	3510	O
NWMN_0982	hypothetical protein	17390	12100	7234	11769	13075	8264	11317	9843	6509	12294	12014	5899	S
NWMN_0983	hypothetical protein	7291	12096	4099	5660	9657	5341	6203	6985	4634	7766	8254	3325	S
NWMN_0984	glycerophosphoryl diester phosphodiesterase	3158.29	4103.86	1411.29	2643	4196	1498.57	2537	1558.66	1289.14	3550.29	3085.14	1047.14	C
NWMN_0985	hypothetical protein	2716.71	3151.57	762.714	2940.43	2541.29	831.114	1915	1696.86	865.714	2967.71	1764.43	498.371	S
NWMN_0986	hypothetical protein	1033	1214	356.5	811.6	902.4	327.1	702.7	671.6	359.2	1340	819.4	275.3
NWMN_0987	hypothetical protein	1068	1235	463.2	1135	1195	597	803.8	885.3	592.9	1687	1060	457.7	L
NWMN_0988	pantetheine-phosphate adenylyltransferase	1215	1318	525.5	1175	1255	687.5	1031	736	557.1	1504	982.9	452.8	H
NWMN_0989	hypothetical protein	1393	1965	475	916.1	1333	735.5	1170	985.7	506.5	1243	934	312.3	R
NWMN_0990	hypothetical protein	11044	12272	3901	9989	11346	4690	9275	7364	4336	13824	10047	4494	R
NWMN_0991	50S ribosomal protein L32	14353.5	19291.5	5099.5	11949.5	17797	8265	15659.5	11789.5	7277	16244	14667.5	5944	J
NWMN_0992	integrase	704.1	437.6	232.1	323.4	353.3	331	494.9	258.6	238	520.1	324	254.4	L
NWMN_0994	phage cI-like repressor	7711	9902	4395	6367	6915	3159	6605	5449	3502	9217	6630	2714	K
NWMN_0995	bacteriophage L54a antirepressor	1450	1603	693.7	1241	2153	1680	545.9	760.5	619	715.3	795.5	493.5	K
NWMN_0996	hypothetical protein	1532	1178	240.2	838.3	1407	1094	467.2	385.8	416.6	74.49	471.1	439
NWMN_0998	hypothetical protein	1540	1105	553.4	936.3	1652	1312	506.6	625	481.2	477.1	581.5	459.3
NWMN_0999	hypothetical protein	1191	998.2	464.1	728.4	1221	1175	436.1	542.7	365.6	415	480.7	329.9	L
NWMN_1038	phage holin	231.9	239.6	131.6	151.8	333.8	319.2	65.04	148.6	108.7	68.27	120.5	99.36	S
NWMN_1039	phage protein	607.4	461.3	341.1	348.5	673.4	738.1	467.7	293.4	246.3	100.7	249.8	282.3	M
NWMN_1040	neurofilament protein	452.8	857.9	275.1	289.5	532.4	231.3	279.5	331.7	208.6	470.9	580.2	206.7	M
NWMN_1041	iron-regulated heme-iron binding protein IsdA	1982	4266.45	1610.36	1561.04	2442.27	662.564	2868.27	2238.64	1421.45	2839.18	3257.09	888.873	M
NWMN_1042	iron-regulated cell surface protein	432.114	1113.97	217.543	198.214	297.157	107.749	479.729	425.286	208.829	599.1	569.729	166.671	M
NWMN_1043	hypothetical protein	336.2	1030	186.3	190.3	268.2	93.26	255.7	166.4	143.8	196.2	517.8	154.6
NWMN_1044	iron compound ABC transporter	365.1	987.1	234.7	188.7	246.3	110.8	276.3	324.2	212.5	546.6	536.3	185.7	P
NWMN_1045	iron compound ABC transporter permease protein	1205.57	1632.43	370.786	520.157	596.8	389.943	844.814	636.643	453.671	818.914	886.814	439.6	P
NWMN_1046	NPQTN-specific sortase B	588.871	858.714	190.731	256.757	332.186	141.657	392.914	259.801	201.986	337.124	384.886	142.929	S
NWMN_1047	heme-degrading monooxygenase IsdG	698.9	990.45	411.45	558.65	275.1	273.25	565.25	490.4	321.85	633.85	629.8	282.3	R
NWMN_1048	SpoU rRNA methylase	1506.2	1631.57	754.829	1547.29	1303.71	552.171	1898	956.014	590.571	1960.29	1160.69	484.757	J
NWMN_1049	phenylalanyl-tRNA synthetase subunit alpha	2728	3178	1366	1936	2381	1492	2265	1837	1507	2848	2530	1492	J
NWMN_1050	phenylalanyl-tRNA synthetase beta subunit	3070	3279	1884	1779	2601	2010	2232	2089	1881	3067	2937	2207	J
NWMN_1051	ribonuclease HIII	952.4	1003	289	859.8	900.1	280.5	683.6	43.94	287.6	999.7	620.1	234	L
NWMN_1053	hypothetical protein	1701	1454	686.8	1647	1219	617	1668	875.2	791.8	1906	1144	583.6	S
NWMN_1054	hypothetical protein	882.6	688.3	321.8	786.1	604.3	353.3	795.6	474.5	395.5	1312	571.9	295.3	R
NWMN_1055	hypothetical protein	1820	1265	677.1	1241	1113	908.6	1260	762.5	587.1	1978	1091	753.6	E
NWMN_1056	recombination and DNA strand exchange inhibitor protein	1364	1238	676.1	1081	1212	876.8	1000	916.7	644.5	1604	1290	947.3	L
NWMN_1057	thioredoxin	3657	5002	1908	3923.57	4244.43	2309.43	6215.29	2998.29	3543.86	4735.43	5577.29	2514.71	O
NWMN_1058	excinuclease ABC subunit C	13313	7731	8026	7426	7210	11843	12567	5847	5783	9365	5816	9371	L
NWMN_1059	hypothetical protein	50919	51817	22899	39413	53121	31832	30413	34155	21073	39869	33966	21012
NWMN_1060	succinate dehydrogenase cytochrome b-558 subunit	48327	53067	22743	32905	46180	33970	34893	36420	26537	38744	37107	27124	C
NWMN_1061	succinate dehydrogenase flavoprotein subunit	57818	50366	28781	31218	44454	34579	39531	1829	27890	35532	42721	30254	C
NWMN_1062	succinate dehydrogenase iron-sulfur subunit	15955	13995	13888	8884	151.3	9732	17373	15656	11662	14741	12201	10347	C
NWMN_1063	glutamate racemase	4820	9841	3522	5419	9680	4728	3612	5303	2673	4954	4813	1831	M
NWMN_1064	hypothetical protein	4858.29	7059.86	3414.57	4137.14	7015.57	3998.29	3494.29	4446.71	3066.14	4613.14	4483.29	2073.29	F
NWMN_1065	hypothetical protein	5913.86	9122	4577	4568.57	7785.86	5049.29	5189.86	6145.14	4054.86	6434.43	6357.86	2730.86	R
NWMN_1066	fibrinogen-binding protein-related	3954	5165	771.3	1492	2237	845	4583	1610	2092	3234	3132	1661
NWMN_1067	formyl peptide receptor-like 1 inhibitory protein	390.7	534.3	196.1	166.3	250.1	105.8	454.3	100.9	316.6	533	445.8	256.1
NWMN_1068	hypothetical protein	1813	2494	2015	1144	986.4	842.8	1863	1593	2661	3257	2435	2120
NWMN_1069	fibrinogen-binding protein	17644	28650	3007	6771	8461	2519	23617	7189	15779	7313	26501	19156	M
NWMN_1070	fibrinogen-binding protein -related protein	9046	15809	5422	4272	5741	1957	11781	12724	10994	14714	20022	11227
NWMN_1071	hypothetical protein	2765	4098	1160	1666	3873	2782	2479	1817	1622	2573	2261	1528
NWMN_1072	hypothetical protein	3228	3714	1753	3313	3749	1580	3062	2764	1878	4125	2564	1152
NWMN_1073	alpha-hemolysin	18602	26464	23752	7397	9000	7886	40705	25589	31925	38155	31369	32277
NWMN_1074	hypothetical protein	545	627	298.7	299.1	333	159.3	607.2	419.3	402.9	727.3	637.4	336.1
NWMN_1075	superantigen-like protein	122.4	78.17	63.79	44.61	53.78	65.33	112.4	54.99	68.87	81.75	69.06	61.36
NWMN_1076	superantigen-like protein	199.8	131.4	106.7	60.93	67.95	93.05	129.1	25.97	94.57	0.01	118.5	105.7
NWMN_1077	superantigen-like set3 protein	156.3	128.4	88.54	68.98	84.15	87.18	131.7	95.62	115.8	140.6	116.5	107.2
NWMN_1078	ornithine carbamoyltransferase	786.4	483.314	306.329	370.314	489.629	393.614	512.5	363.9	315.771	518.486	444.643	308.286	E
NWMN_1079	carbamate kinase	722.1	383.5	266.5	288.6	456.8	360.4	581.2	311.9	277.8	339.7	382.7	298.6	E
NWMN_1080	hypothetical protein	1890	889.7	965.7	949.5	1121	1652	1846	771	662.5	1184	695.5	967.3	S
NWMN_1081	hypothetical protein	1439	1263	327.6	636.4	1031	351.7	755	647	445.9	1326	964.9	277.4
NWMN_1082	exfoliative toxin A	1230.45	954.15	530.9	559.25	829.1	555.3	692.9	629.05	540.15	909.65	763.45	481.9	P
NWMN_1084	antibacterial protein	46547	65173	35164	14661	13900	8768	63216	50495	36256	62407	60534	38379
NWMN_1085	HAD superfamily hydrolase	1004	1769	792.9	789.7	1212	771.2	877.6	1072	805.6	1206	1139	601.8	R
NWMN_1086	hypothetical protein	17856	41137	17170	16609	24897	16750	17004	22747	18013	24671	24983	13450	K
NWMN_1087	hypothetical protein	2320.71	2741.86	1088.87	2216.43	2520.71	1490	1765.14	1738.14	1209.93	2868.14	2202	1130.29	S
NWMN_1088	cell division protein MraZ	25217	25489	6559	19721	12780	10297	17673	394.6	18307	10148	20700	12600	S
NWMN_1089	S-adenosyl-methyltransferase MraW	31021	37318	24877	23993	17210	16505	31664	27359	27164	49616	34887	24940	M
NWMN_1090	cell division protein	39782	31033	14395	16638	19330	20557	24657	19297	15573	28742	24651	13999	D
NWMN_1091	penicillin-binding protein 1	1697	1342	1059	738.8	1006	585	2442	1396	926.9	2094	2024	784.8	M
NWMN_1092	phospho-N-acetylmuramoyl-pentapeptide-transferase	6362	3190	2660	2412	2939	2665	5815	3785	3200	5680	5079	3125	M
NWMN_1093	UDP-N-acetylmuramoyl-L-alanyl-D-glutamate synthetase	10946	7134	5680	5289	5988	6343	8902	6481	5710	9227	7258	6313	M
NWMN_1094	cell division protein	7151	6114	4305	5228	5531	4456	6708	4796	4317	7417	7285	4877	M
NWMN_1095	cell division protein	19591	19031	10844	14347	18552	14965	15597	15752	10001	21242	20406	11662	D
NWMN_1096	cell division protein FtsZ	23426	27565	13564	20625	24698	14438	23007	20437	12758	25355	30021	14361	D
NWMN_1097	hypothetical protein	17123.6	25730	9062.8	12131.2	18133.6	9900.4	10304	14492.4	7115.4	15253.2	18652	6428.4	S
NWMN_1098	hypothetical protein	21492	27608.5	11085.5	17974	13671	14813	15063.5	19487.5	12818	23888.5	22434	10351.5	R
NWMN_1099	hypothetical protein	4295	5902.5	1786.65	3449.5	5158	2918	4066	2413.55	2739	3332	4334.5	2311.5	S
NWMN_1100	hypothetical protein	1884	2112	1247	1438	2421	1702	2447	1912	1254	2049	1553	819.5	S
NWMN_1101	hypothetical protein	1135	1055	278.7	808.1	856.2	344.8	677.6	709.2	295.1	1204	850.2	256.7	S
NWMN_1102	hypothetical protein	17299	20786	4857	17841	19022	5422	11995	9343	3845	14997	8666	2567	D
NWMN_1103	isoleucyl-tRNA synthetase	2023	2698	948.7	1402	2396	891.1	1826	1684	757.2	1885	2065	617.6	J
NWMN_1104	hypothetical protein	83.43	85.94	45.06	56.12	83.37	44.81	70.17	58.42	58.89	106.5	97.79	56.44
NWMN_1105	glyoxalase	1140	1920	457.9	1086	1417	455	1254	959.4	517.2	1322	1296	435.3	R
NWMN_1107	lipoprotein signal peptidase	1913	2009	800	1848	1611	1235	1631	1154	859	2123	1457	699.3	M
NWMN_1108	pseudouridylate synthase	1434	1454.71	791.757	1354.43	1409.57	831.686	1367.14	974.486	679.371	1735.14	1198.71	608.529	J
NWMN_1109	pyrimidine regulatory protein PyrR	3397.43	4446.14	1163.86	7914.71	2682.43	919.529	3725.71	2091.71	1161	6721.14	3789.43	1024.81	F
NWMN_1110	uracil permease	1059	2083	521.2	4178	1449	411.1	1045	842.6	431.5	1832	995.9	378.3	F
NWMN_1111	aspartate carbamoyltransferase catalytic subunit PyrB	3001.71	3417	1427.29	5191.71	2429.86	1376.57	1326	1613.86	1065	2745.14	2430.29	1088.6	F
NWMN_1112	dihydroorotase	4144.5	3875.5	1909.5	4789	3750	2441.5	1927.5	1939	1458.5	2538	3036	1638.5	F
NWMN_1113	carbamoyl phosphate synthase small subunit	2579	2301	1161	2643	2128	1498	1465	1119	993.8	1563	2032	1192	E
NWMN_1114	carbamoyl phosphate synthase large subunit	3714	3536	2029	4451	3340	2312	2127	1790	1553	3136	3430	1901	E
NWMN_1115	orotidine 5'-phosphate decarboxylase	2608	2420	1468	3256	2250	2083	1772	1216	1292	2447	2161	1372	F
NWMN_1116	orotate phosphoribosyltransferase	1970	1280	692.2	1588	1265	862.05	1100	555.35	615.85	1131.8	924.35	718.9	F
NWMN_1117	hypothetical protein	733.643	694.929	344.771	914.857	673.457	425.943	602.157	401.529	396.386	883.786	672.886	367.886
NWMN_1118	hypothetical protein	3692	6982	2186	3097	4385	2555	3488	3171	3017	4312	4059	2335	S
NWMN_1119	fibronectin-binding protein A-related	3441	3879	994.6	3446	3407	1213	2797	2026	1031	3249	1805	733	K
NWMN_1120	guanylate kinase	16672	25162	8216	16960	23524	9550	17147	15215	7907	18831	16074	4760	F
NWMN_1121	phosphopantothenoylcysteine decarboxylase/phosphopantothenate--cysteine ligase	3154	4163	1452	2579	3816	1833	2229	2467	1262	3053	2652	1044	H
NWMN_1122	primosomal protein N	7441	10324	4737	5025	8389	4855	4638	5302	3885	5874	7124	3652	L
NWMN_1123	hypothetical protein	769.8	1276	393.7	811.4	943.6	351.7	766.9	540.1	418.6	706	675.6	235.1
NWMN_1124	hypothetical protein	57147	50672	60739	31582	32984	59168	61760	36264	64024	52145	45192	58689	S
NWMN_1125	polypeptide deformylase	8524.71	6540.57	2357	6767.29	6962.14	3947.86	4526.14	4295.57	2375.43	8556	5188.43	2304.86	J
NWMN_1126	methionyl-tRNA formyltransferase	12055	10875	3751	7891	9264	4510	7084	6770	3639	11440	8420	3732	J
NWMN_1127	sun protein	13031.3	12489.1	6288.57	6687.86	9141.43	5886.57	8660.86	8425	5855.71	14566	10639.4	6640.86	J
NWMN_1128	hypothetical protein	7962	7586	3941	139.3	98.04	424.4	5039	5409	4184	8008	6931	4352	R
NWMN_1129	protein phosphatase 2C domain-containing protein	7405	7515	3889	57.56	54.04	53.17	4884	5609	4691	87.85	89.87	55.91	T
NWMN_1130	serine/threonine-protein kinase	6991	6535	3759	6676	10344	4174	74.84	19.19	20.98	17.23	14.7	23.48	R
NWMN_1131	hypothetical protein	3004	3205	1354	2938	3170	1936	2623	2188	1562	4077	2539	1421	R
NWMN_1132	ribulose-phosphate 3-epimerase	3836.75	5165	2374	3489.75	4502.25	2792	4447	3386.75	2167	5405.5	3929.75	2500.75	G
NWMN_1133	hypothetical protein	2321	2450	1276	1690	2414	1693	2493	1739	1411	2651	2197	1523	H
NWMN_1134	50S ribosomal protein L28	1505.14	1225.43	1455.57	1600.29	1382.86	938.4	4072.71	1563.43	1323.14	1509.29	1472.71	1424.14	J
NWMN_1135	hypothetical protein	14271	18745	6765	14624	19071	8628	12658	11314	6485	17884	12923	4866	S
NWMN_1136	DAK2 domain-containing protein	10679	13836.9	3453	11009.6	11519.1	5989.43	10337.6	7683.29	3905.14	6552.09	8113.57	3373.43	R
NWMN_1137	ATP-dependent DNA helicase RecG	5487	8021	2996	5314	7335	4387	4521	4689	3407	6055	5384	2288	L
NWMN_1138	fatty acid biosynthesis transcriptional regulator	6348	5709	1062	4045	5920	3690	4338	433.3	2842	4743	4382	3382	Q
NWMN_1139	glycerol-3-phosphate acyltransferase PlsX	7052	7264	3613	5136	7315	4747	5074	5082	4050	8653	6996	4772	I
NWMN_1140	malonyl CoA-acyl carrier protein transacylase	4493	4196.5	2426.5	3035.5	4487.5	2964	3440.5	3210	2374.5	5267.5	4448.5	3118.5	I
NWMN_1141	3-oxoacyl-(acyl-carrier-protein) reductase	2601	2409	1592	1780	2513	1548	2764	1831	1470	3132	2655	1792	I
NWMN_1142	acyl carrier protein	1523	1729	566.9	1660	1836	1356	3394	1235	2103	2068	2324	1793	I
NWMN_1143	ribonuclease III	2685	3165	1090	2438	2754	1434	1435	853.5	811.9	2077	1643	699.2	K
NWMN_1144	SMC domain-containing protein	3343.67	4031	1574.67	2319.67	2976	1677.33	2093	1741.33	1267.67	2604	2382.67	1064.23	D
NWMN_1145	signal recognition particle-docking protein FtsY	5139	5361	2585	2676	4443	3299	2846	3157	2496	3299	4184	2624	U
NWMN_1146	hypothetical protein	5587	5305	2945	2522	4635	3290	2810	3586	2531	3980	4459	2735	S
NWMN_1147	signal recognition particle protein	4555	5869	2263	3782	5305	2675	3739	3526	2001	5524	5110	1885	U
NWMN_1148	30S ribosomal protein S16	1355	1307	476.6	1542	1609	465.1	2016	1167	619.8	1874	1424	436.2	J
NWMN_1149	16S rRNA processing protein	1153	1147	344.5	900.4	1113	517.2	964.9	708.9	352.2	1338	846.3	311.4	J
NWMN_1150	tRNA (guanine-N1)-methyltransferase	1322	1348	464.5	1282	1438	566	1167	1191	469	1657	1166	421.5	J
NWMN_1151	50S ribosomal protein L19	779.2	801	430.5	767.5	1052	639.3	1042	701.3	468.2	1107	876.5	382.7	J
NWMN_1152	hypothetical protein	4593	4839	2432	2948	3806	3283	2684	3047	2095	4309	3630	2190	S
NWMN_1153	ribosomal biogenesis GTPase	1727	1360	563.9	1369	1455	960.6	1156	949.9	510.6	1822	1325	500.1	R
NWMN_1154	ribonuclease HII	2561.57	1812.86	632.8	1675.14	1849	1291.71	1353.14	959.143	736.371	1370.03	1622.57	976.829	L
NWMN_1155	succinyl-CoA synthetase subunit beta	47133.5	52047.5	26573	46336.5	52674	33307.5	45328	48443.5	22286.5	48350	49400	25161	C
NWMN_1156	succinyl-CoA synthetase subunit alpha	28677	44997	17609	28470	42587	21377	29321	34353	16280	33959	35417	16311	C
NWMN_1157	cell wall hydrolase	338.9	341.1	296.1	334.4	308.6	177.5	353.7	315.2	273.6	459.7	325.2	227.7	M
NWMN_1158	methicillin resistance-related protein FmhC	319.3	264.5	144.3	219.3	216.9	140.7	286.4	185.3	189.9	380.8	297.5	164	V
NWMN_1159	hypothetical protein	1079	1052	343.1	605.7	1036	447.3	476.9	545.8	255.2	572.3	657.2	242.3	L
NWMN_1160	DNA topoisomerase I	34694	14945	12148	16887	19676	18713	21177	10583	6086	13043	11928	9414	L
NWMN_1161	tRNA (uracil-5-)-methyltransferase Gid	10676.6	7819.14	7820.29	8827.71	9898.71	11945.3	9706.43	7279.29	5581	9312.14	6902.86	7351.71	J
NWMN_1162	site-specific recombinase	16114	21641	8711	11862	21676	13849	11230	13376	9537	14797	15904	10138	L
NWMN_1163	ATP-dependent protease peptidase subunit	13589	17961	7054	10080.5	19775	10646	7452.5	11762	7250	11442	13475	8293.5	O
NWMN_1164	ATP-dependent protease ATP-binding subunit	13516	11976	6053	7616	14512	9995	6805	9534	6743	9966	10990	7209	O
NWMN_1165	transcriptional repressor CodY	7851	9318	4857	5936	8318	4670	6822	5209	4467	4960	8428	5139	K
NWMN_1166	30S ribosomal protein S2	7597	5097	819.4	4811	5096	2828	6003	2141	2216	449	1949	2429	J
NWMN_1167	elongation factor Ts	20434	25299	14234	14853.5	19597	8745.5	18703.5	15240	10185.5	18075	17301	9145	J
NWMN_1168	uridylate kinase	7918.8	10795.2	3221.9	6367.4	9390.6	2005	6705.6	5915.6	2523.96	7018.34	6634.18	1682.26	F
NWMN_1169	ribosome recycling factor	5011	7632	2884	4151	5241	1786	5634	4865	2560	5328	4953	1606	J
NWMN_1170	undecaprenyl diphosphate synthase	3558	3640	1111	3634	3426	911.5	3840	2883	1299	5314	3337	827	I
NWMN_1171	phosphatidate cytidylyltransferase	1121	1158	294.9	1023	1225	200.6	871.1	804.9	256.5	1207	1182	187.8	I
NWMN_1172	membrane-associated zinc metalloprotease	2872	2711	881	2341	3268	1081	2194	2110	796.5	2700	2276	761.3	M
NWMN_1173	prolyl-tRNA synthetase	2347	2610	1377	1954	3069	1577	2166	2142	1102	2939	2474	1051	J
NWMN_1174	DNA polymerase III PolC	9957	11223	6242	5562	10545	8514	5062	7391	5592	6625	10244	5542	L
NWMN_1175	hypothetical protein	8177.14	7155.14	2953.14	6126.86	8065	4446.71	4659.43	4879.86	3028	6916.14	6426	3174.57	S
NWMN_1176	transcription elongation factor NusA	5153	4712	1421	3590	4532	2392	3040	3028	1657	3989	3825	1954	K
NWMN_1177	ribosomal protein L7Ae	13163	12007	5539	8874	12010	7032	7346	7884	4774	9471	10551	5339	J
NWMN_1178	translation initiation factor IF-2	4225	3758	2232	2478	3549	2928	3039	2688	2180	3789	4059	2699	J
NWMN_1179	ribosome-binding factor A	3120	2938	1069	3742	3422	1465	3274	2431	1451	4364	3148	1237	J
NWMN_1180	tRNA pseudouridine synthase B	10466	3471	4296	2683	1902	4228	8630	3210	4567	3037	3083	3648	J
NWMN_1181	riboflavin biosynthesis protein RibF	10434.3	4730.57	4231.43	3650.57	4624.86	4914	9854	3521.71	3348.29	4395.43	3352.43	3901.29	H
NWMN_1182	30S ribosomal protein S15	9905	7096	5218	6431	7467	5405	11702	5413	4050	7764	6271	4523	J
NWMN_1183	polynucleotide phosphorylase/polyadenylase	15311	17737	4249	13333	17418	4665	10636	10024	3897	10796	12246	3032	J
NWMN_1184	RNA-metabolising metallo-beta-lactamase	6457	8152	3116	5467	7104	3360	7527	5712	3108	9593	7305	2749	R
NWMN_1185	DNA translocase FtsK/SpoIIIE	7281	4753	3342	3588	0.01	3891	6081	3420	3269	4502	3284	2816	D
NWMN_1186	transcriptional regulator GntR	4846.6	3066.4	1064.16	2093.6	2135.8	866	3178.8	1340.4	1046.12	1521	1282.8	551.06	K
NWMN_1187	hypothetical protein	2204	1745	634.4	958	1132	368.2	2515	808.5	524.1	1014	793.8	294.6	R
NWMN_1188	peptidase M16	2974	4315	3082	2851	2663	2223	4141	2218	2150	4389	2962	2331	R
NWMN_1189	acetoacetyl-CoA reductase	3018	5613	2974	3545	3173	2341	3069	2980	2582	5618	3343	2488	I
NWMN_1190	ACT domain-containing protein	4576	7548	3249	5081	5422	3022	4309	4305	3294	7752	4830	2598
NWMN_1191	transcriptional regulator Cro/CI	3668	4283	2128	3081	3390	1959	3756	3267	2516	5507	3382	1976	S
NWMN_1192	CDP-diacylglycerol--glycerol-3-phosphate 3-phosphatidyltransferase	5020	6735	3182	4397	3378	2688	5079	4016	3210	6381	4857	2595	I
NWMN_1193	competence-damage inducible protein cinA	2126	3010	889.8	2369	3653	1325	1774	1925	925.4	2224	1985	685.4	I
NWMN_1194	recombinase A	15031	12398	2297	8181	11020	6407	13812	7382	4947	5561	8487	4340	L
NWMN_1195	phosphodiesterase	2840	3784	2383	2567	2772	1979	3782	3097	3011	5022	4042	2379	R
NWMN_1196	hypothetical protein	317.7	738.5	276.5	522	713.1	262.6	369.7	495.4	270.5	427.8	415.8	110.7
NWMN_1197	hypothetical protein	2177	1538	496.9	1789	1747	671	1492	987.5	567	1778	1381	549.7	S
NWMN_1198	pyruvate flavodoxin ferredoxin oxidoreductase alpha subunit	7260	10963	3048	5286	6874	3455	4396	5078	2656	5795	7083	2379	C
NWMN_1199	2-oxoglutarate ferredoxin oxidoreductase subunit beta	6012	8742	4101	5191	6989	3088	3970	5348	3303	5197	7251	2734	C
NWMN_1200	hypothetical protein	3589.14	5921.71	1941.57	2574.57	3728.14	1654.29	2575.43	2942.71	2054	3945.14	3844.29	1612.71	S
NWMN_1201	tRNA-i(6)A37 modification enzyme MiaB	5342	4814	2998	4170	5928	3204	4303	5157	3474	6435	5810	2875	J
NWMN_1202	hypothetical protein	3578	4455	2086	2653	3569	1926	3320	3043	1782	3912	3692	1716	S
NWMN_1203	hypothetical protein	1475	1809.71	948.771	1002.89	1590.14	935.771	1295.31	1261.09	827.486	1576	1520.43	742.8	S
NWMN_1204	DNA mismatch repair protein	2511.57	3407	1197	2177.71	3699.57	1501.43	1621.71	2094	1082	2471.43	2523.14	919.386	L
NWMN_1205	DNA mismatch repair protein HexB	1767	2265	995.2	1645	2462	1101	1261	1660	1127	2171	2263	889.1	L
NWMN_1206	glycerol uptake operon antiterminator regulatory protein	1176	1575	860.3	944.3	1505	813.5	1024	1030	939.6	1481	1492	735.2	K
NWMN_1207	glycerol uptake facilitator protein	28167	22773	12725	32498	29749	9858	22677	17874	9905	27990	20789	5589	G
NWMN_1208	glycerol kinase	4081	2069	1541	2832	2366	2149	3296	1629	1402	3268	2271	1492	C
NWMN_1209	aerobic glycerol-3-phosphate dehydrogenase	12511	10708	8071	10248	11748	8331	9541	8492	7458	10457	10583	6645	C
NWMN_1210	hydrolase alpha/beta fold domain-containing protein	2270	3309	616.3	2058	2114	916	1613	441.9	733.8	2812	1947	583	I
NWMN_1211	tRNA delta(2)-isopentenylpyrophosphate transferase	2456.5	3542	1322.5	1466	2012	1192.5	2152.5	1693.5	1478	3681	2570	1197.25	J
NWMN_1212	host factor 1 protein	546.05	795.35	247.8	230.85	461.7	275.55	416.25	416.2	288.5	795.35	481.4	221.15	R
NWMN_1213	glutathione peroxidase	14365	21246	10039	12362	17349	9234	14933	12760	9417	13630	15088	6794	O
NWMN_1214	GTP-binding protein	1299.5	1553	440.65	1522	1608.5	951.55	940.05	539.505	497.65	1290.35	1087.5	537.05	R
NWMN_1215	hypothetical protein	1224	1395	651.8	1310	1480	1058	918.3	809.6	543.5	1799	1133	621.6	P
NWMN_1216	glutamine synthetase repressor	19716.3	19402.7	4179.57	12656.3	13873.6	5670.43	16932.6	7682.43	5769.14	11818	13004.4	4759.71	K
NWMN_1217	glutamine synthetase	15079	13967	8333	8731	10450	6139	16084	10692	7912	13114	11813	7802	E
NWMN_1218	hypothetical protein	493.5	638.5	326.4	184.2	218.7	309.4	266.4	293.4	329.5	425.8	450.3	265
NWMN_1222	hypothetical protein	77.876	61.746	10.6684	55.506	65.018	22.472	29.918	20.4612	18.054	55.326	39.24	13.8264
NWMN_1223	hypothetical protein	515.5	520.533	139.313	621.067	375.533	90.8333	622.123	277.93	130.387	458.967	264.917	76.64	T
NWMN_1224	hypothetical protein	553.56	950.8	157.132	614.54	578.82	124.44	495.24	319.66	180.18	592.1	366.18	68.426
NWMN_1225	hypothetical protein	1485	1708	1512	915.1	972.9	593.7	1505	1134	1316	1644	1073	721.1	K
NWMN_1226	hypothetical protein	609.1	664.8	466	461.3	337.6	300	487.8	349	425.2	713.3	439.3	302.9
NWMN_1228	hypothetical protein	960.6	1732	493.1	376.8	811.5	343	1038	2143	1023	1869	2538	854.8	E
NWMN_1229	hypothetical protein	413.9	567.9	153.7	310.5	521.4	190.1	188.8	257	139.1	313.7	315.6	97.78
NWMN_1230	cardiolipin synthetase	5076	8779	3216	5362	6486	2346	3601	4343	2793	5237	5236	1853	I
NWMN_1231	ABC transporter ATP-binding protein	573.2	711.914	266.943	365.014	480.371	206.8	378.386	395.586	275.957	443.829	544.286	227.086	V
NWMN_1232	ABC transporter permease protein	731.257	985.886	516.857	651.157	850.971	510.814	626.7	644.671	458.186	800.229	790.786	380.3	V
NWMN_1233	histidine kinase	3319	3880	1729	2826	3904	2300	1979	2617	1530	3491	2817	1513	T
NWMN_1234	two-component response regulator	1085	1458	847.9	960.1	1785	883.6	1127	842.4	856.7	871.7	1115	533.4	T
NWMN_1235	hypothetical protein	1789	2085	1444	1546	1836	1408	2927	1926	2650	3739	3065	1926
NWMN_1236	thermonuclease	387.2	373.4	191.1	362.7	373.4	207.3	330.7	265	210.7	365.3	281.6	136.4	L
NWMN_1237	hypothetical protein	4702	6561	3332	3789	4307	2530	4761	4049	3684	5335	5134	2583
NWMN_1238	hypothetical protein	3897	4153.57	1009.77	3579	2681.86	1199.86	3279	1295	1768.57	2461.6	2940.57	1633.43
NWMN_1239	aspartate kinase (lysC1/ThrA)	5634	9279	2178	3692	6760	2346	3612	4504	1973	4648	4248	951.8	E
NWMN_1240	homoserine dehydrogenase	23902	31942	18151	15522	28039	22228	15548	20188	19051	19951	25694	18998	E
NWMN_1241	threonine synthase	10738	12947	9138	5683	9518	10473	6951	8569	9043	9132	10294	8244	E
NWMN_1242	homoserine kinase	18060.4	23475.9	14607.6	9607.14	19162	13829	13099.9	14374	14229	14406	19158.7	11680.4	E
NWMN_1243	haloacid dehalogenase-like hydrolase	11200	14283	8003	6265	11636	8103	9864	9001	7845	9948	10919	6857	R
NWMN_1244	hypothetical protein	3458	4876	2307	3363	3561	1763	4181	3370	2625	5069	3522	1374
NWMN_1245	amino acid permease	9888.5	11983	4673.25	7785.5	10438.8	4315.25	6694.25	6430.25	4413.75	8189.5	8513.25	4249.25	E
NWMN_1246	catalase	65177	65172	65160	65183	65181	65177	65161	65183	64875	65175	65181	65179	P
NWMN_1247	50S ribosomal protein L33	3686	3774	4026	3623	3335	2744	4833	4380	3132	3710	3783	3108	J
NWMN_1248	30S ribosomal protein S14	747	584.9	315.3	505.5	777.2	597.3	1042	481.2	295.7	576.2	499	309.5	J
NWMN_1249	guanosine 5'-monophosphate oxidoreductase	374.433	225.533	109.593	270.733	256.333	185.293	199.93	117.737	115.213	212.07	191.12	113.297	F
NWMN_1250	hypothetical protein	3276	5046	1423	3583	4153	1676	3078	3028	1804	4034	4032	1479	S
NWMN_1251	LexA repressor	8015	9921	6739	4358	6719	4923	8798	8143	8114	10911	9734	6948	K
NWMN_1252	hypothetical protein	468.9	508.8	134	283.8	324.8	149.8	570.7	276	148	476.6	311.7	124
NWMN_1253	hypothetical protein	11078	8683	2638	6672	7561	3408	5456	4565	2027	6631	5130	1646	S
NWMN_1254	transketolase	11010.5	14600	6999	10184	15833.5	7632	11356	11072	6392	10821	13909	6176	G
NWMN_1255	hypothetical protein	942.1	1169	638.4	1254	1237	580.2	1215	883.4	823.5	1308	1247	630.2	S
NWMN_1256	hypothetical protein	595.786	610.157	224.313	602.557	609.629	328.214	625.529	433.473	238.824	820.586	540.5	258.267	O
NWMN_1257	exonuclease SbcD	717.4	887.2	226.2	597.9	685.4	222	564	335.3	242.8	752.3	607.8	199.2	L
NWMN_1258	exonuclease SbcC	1258.69	848.4	401.414	622.114	1263.91	345.014	481.971	218.129	410.757	198.043	450.014	556.514	L
NWMN_1259	hypothetical protein	3086	3699	1513	1252	3159	1800	2098	2675	2572	2569	2886	1334
NWMN_1260	large conductance mechanosensitive channel	4580.5	5761.5	5178	3763	3644	3665	7372.5	6044.5	6066	6383	5896	4058.5	M
NWMN_1261	glycine betaine transporter	526.2	409	294.3	622.7	694.4	381.8	589.1	491.6	203.1	623.6	429.7	233.3	M
NWMN_1263	aconitate hydratase	6170	6282	4172	3838	4829	3928	5405	4388	3841	6043	5189	3499	C
NWMN_1264	hypothetical protein	3388	4785	2118	2811	3529	26090	3053	3119	2276	3842	3247	1504	R
NWMN_1265	hypothetical protein	381.4	698.3	296.2	236.9	711.7	557.1	466.8	517.8	363	954.8	464.7	290.1	S
NWMN_1266	hypothetical protein	2706	3206	1585	2481	3078	1922	3338	2501	2095	3879	2845	1500	S
NWMN_1267	DNA topoisomerase IV subunit B	2974	1907	987	1998	2243	1420	1989	1243	811.6	2345	1641	944.3	L
NWMN_1268	DNA topoisomerase IV subunit A	1357	1433	771.7	1318	1548	938.9	1208	935.3	632.4	1953	1124	860	L
NWMN_1269	sodium:alanine symporter	406	374.4	202.7	398.4	407.6	177	397.5	292.2	160.2	475.4	376.5	148.9	E
NWMN_1270	transcription antiterminator	6841	10681	3394	6658	8103	3123	5110	5687	2600	9310	6656	2081	K
NWMN_1271	hypothetical protein	13773	21202	7786	10598	15452	8066	12828	11821	7358	17155	15463	6184	R
NWMN_1272	oxacillin resistance-related FmtC protein	17395	25817	15056	12736	19021	14492	6848	16479	11367	10509	21893	10376	S
NWMN_1273	methionine sulfoxide reductase A	7411	10349	2138	7048	8437	3005	4936	5583	2258	6708	5803	1473	O
NWMN_1274	transcriptional regulator	557.2	705.3	274.1	599	774.5	504.3	712.6	432.4	333.4	626	478.1	253.6	K
NWMN_1275	4-oxalocrotonate tautomerase	5277	7093	3901	4598	5302	3905	7680	6358	6434	8328	7995	4356	R
NWMN_1276	ImpB/MucB/SamB family DNA-damage repair protein	1218	1051	536.9	448	732.5	502.4	679.8	631.6	461	898.2	771	473.9	L
NWMN_1277	prephenate dehydrogenase	2162	3091	1603	1616	2318	1808	1950	1849	1545	2497	2038	1413	E
NWMN_1278	hypothetical protein	2699	3928	1704	1959	2973	1831	2466	2598	1748	3310	3011	1499	G
NWMN_1279	anthranilate synthase component I	1255.67	553.257	153.404	230.1	639.043	700.654	290.486	317.829	142.187	386.386	352.214	160.87	E
NWMN_1280	anthranilate synthase component II	540.357	725.814	372.771	361.729	468.843	281.443	555.586	507.543	321.3	630.471	534.871	236.929	E
NWMN_1281	anthranilate phosphoribosyltransferase	567.4	654.4	317.7	271.2	467.8	323.3	304.5	518.9	285.1	318.5	487.5	276.3	E
NWMN_1282	indole-3-glycerol-phosphate synthase	731.633	778	423.8	296.433	538.3	532.133	465.533	472.067	426.767	397.067	528.833	348.767	E
NWMN_1283	N-(5'phosphoribosyl)anthranilate isomerase	677.1	725.3	427.8	328.6	554.6	497.7	401.2	468.5	396.3	375.9	605.1	410.7	E
NWMN_1284	tryptophan synthase subunit beta	965.5	855.8	663.9	446.5	0.01	673.9	571.3	613.4	509.4	574.8	624.5	502	E
NWMN_1285	tryptophan synthase subunit alpha	1375	1188	744.9	716.5	917.2	987.4	917.1	811.1	739	1193	1054	782.8	E
NWMN_1286	methicillin resistance factor FemA	25740	14533	12321	10742	12773	12570	25955	9012	11478	16085	8010	11040	V
NWMN_1287	methicillin resistance factor	15271	9155	11347	9047	8489	10138	20194	9234	8046	13991	9177	8905	V
NWMN_1288	hydrolase-related protein	950.8	1443	329.4	957	1137	335	922.2	850.5	364.8	1304	906.8	204.3	R
NWMN_1289	hypothetical protein	2604	3030	649.2	6.514	1678	1539	2231	1761	1763	111.8	1289	1488	S
NWMN_1290	oligopeptide ABC transporter ATP-binding protein	4631	3278	2262	2873	3247	3635	3592	2406	2816	3857	2968	3038	E
NWMN_1291	peptide ABC transporter ATP-binding protein	1433	1154	313.5	710.6	1191	1296	1050	756.6	978.2	938.7	1181	1079	E
NWMN_1292	oligopeptide transporter permease	727.757	950.1	497.471	584.614	897.214	661.914	585.014	700.771	561.957	866.429	988.286	654.657	E
NWMN_1293	oligopeptide transporter permease	667.7	826.7	369	543.2	685.3	614.4	579.5	633.3	499.9	872.4	804.1	511.6	E
NWMN_1294	hypothetical protein	793.2	1136	379.7	837.3	939.9	497.6	754	509	449.8	659	758.1	378.2	G
NWMN_1295	oligoendopeptidase F	2309.5	6785	1418.3	2056	3907	972.9	1969.5	2931.5	1299.4	2445.5	3004	772.625	E
NWMN_1296	PhoU family transcriptional regulator	459.8	339.9	166.9	308.8	303.9	293	473.9	219.1	194.8	360.1	202.5	268.3	P
NWMN_1297	phosphate ABC transporter ATP-binding protein	561.5	271.5	203.5	368.6	413	521.4	458.2	230.8	244.5	421.5	228.8	389.6	P
NWMN_1298	phosphate ABC transporter permease protein	135.5	86.13	60.36	92.71	169.2	222.9	67.11	70.46	57.98	71.91	78.91	84.81	P
NWMN_1299	phosphate ABC transporter permease protein	83.29	51.88	31.55	69.27	152.1	119.5	24.25	35.66	28.87	28.17	35.01	31.28	P
NWMN_1300	phosphate ABC transporter phosphate-binding protein PstS	310.7	169.9	178.55	190.75	403.8	399.1	210.8	141.57	134.75	168.055	140.39	134.57	P
NWMN_1302	hypothetical protein	5321	6909	3791	5373	5570	3461	5837	3860	4083	6686	4749	2459	S
NWMN_1303	ABC transporter ATP-binding protein	2176	1463	803	1627	1805	1027	2381	1187	632.4	3017	1437	557.9	R
NWMN_1304	aspartate kinase II LysC	902.5	1064	569.7	596.7	955.3	658.3	678.2	741.8	510.9	976.8	890.1	413.7	E
NWMN_1305	aspartate semialdehyde dehydrogenase	3091	4854	1378	1823	3538	1773	1749	363.5	1114	1361	2614	1079	E
NWMN_1306	dihydrodipicolinate synthase	5256	9233	3392	3269	6735	4442	2692	4625	3196	3853	5358	2538	E
NWMN_1307	dihydrodipicolinate reductase	1762	2561	1408	1049	2165	1329	1244	1644	1256	1284	1494	958.7	E
NWMN_1308	2,3,4,5-tetrahydropyridine-2-carboxylate N-succinyltransferase	2492.5	3273.5	1636.5	1251.5	2792	1394	1449	1789	1432.5	1366.5	2378.5	1128.55	E
NWMN_1309	hippurate hydrolase	2792	3472	1787	1367	2645	1685	1687	1761	1350	2038	2579	1237	R
NWMN_1310	alanine racemase	1665	1867	1209	815.4	1620	1111	994	1072	938.3	1524	1423	948.6	M
NWMN_1311	diaminopimelate decarboxylase	1296	2008	954.6	992.9	1761	1276	1612	1156	1003	1517	1386	916	E
NWMN_1312	hypothetical protein	2401	1556	1134	507.6	682.6	858.3	1580	795.6	355.5	894.9	677.5	536.1	V
NWMN_1313	cold shock protein	4013	3951	3928	4219	3489	2337	7020	2748	3878	3110	4357	2699	K
NWMN_1314	hypothetical protein	786.3	1112	223.05	679.7	802.8	286.35	527.15	460.7	264.8	602.8	361.95	128.75	S
NWMN_1315	acylphosphatase	10021.9	16346.1	3982.29	8842.29	12428.3	5279.43	8309.14	8116.29	5422.14	13508.1	13075.7	4152.86	C
NWMN_1316	hypothetical protein	8513	12772	3729	6942	10718	3913	7636	8787	4135	10671	11219	3858	R
NWMN_1317	tellurite resistance protein	10388	17640	5721	7884	12374	6028	10383	10352	6663	12436	12661	5183	P
NWMN_1320	branched-chain amino acid transport system II carrier protein	803.1	1044	237.3	724.1	768.2	167.6	663.4	22.22	212.6	5.047	772.5	130.2	E
NWMN_1321	hypothetical protein	1060	1418	888.2	649.5	1205	587.7	1525	992.9	579.4	1394	1279	517.4	P
NWMN_1322	CbbQ/NirQ/NorQ/GpvN	5180	5926	2372	2364	3715	2404	4031	3142	2128	4665	4212	1800	R
NWMN_1324	hypothetical protein	31014	37977	19829	20538	29925	19546	23246	24146	17696	35716	31936	18117	E
NWMN_1325	dihydrolipoamide acetyltransferase	46693	51632	37416	33425	43937	38797	42014	40773	37241	43165	48085	34587	C
NWMN_1326	alpha-ketoglutarate decarboxylase	65176	65172	59787	64370	65180	65178	62283	63218	51291	58841	65186	58262	C
NWMN_1327	two-component sensor histidine kinase	21386	9721	10233	6291	7535	10127	22410	7340	8651	11022	7610	7331	T
NWMN_1328	DNA-binding response regulator ArlR	14114	5533	6137	3902	4937	6335	13186	4246	5002	6477	4775	4759	T
NWMN_1329	hypothetical protein	10422	7892	4449	6573	8038	5902	8338	5390	3681	6619	6851	4249	I
NWMN_1330	N-acetylglucosaminyl transferase	13059	7017	3868	6180	8154	5515	8619	5254	2987	6533	5881	3549	M
NWMN_1331	acetyltransferase GNAT	15805	4305	3851	2771	3494	2546	6512	2032	1906	2298	2315	1911	K
NWMN_1332	carboxyl-terminal protease	3125	4912	1313	2790	3431	1153	3354	3245	1334	3817	3399	786	M
NWMN_1333	phosphotransferase system enzyme IIA	10525	15665	7614	13191	11005	7531	12701	9273	6353	14602	11824	7639	G
NWMN_1334	methionine sulfoxide reductase B	18355	20522	13185	17223	16283	13929	20271	14977	10718	23303	16835	11442	O
NWMN_1335	methionine sulfoxide reductase A	23074	21306.3	14318	17606.3	17788.7	15533.7	22080	14135.7	10377	21926.3	15322.3	12152.7	O
NWMN_1336	hypothetical protein	26799	21233	11971	17473	17810	18057	22950	12640	10708	20548	15877	13648	S
NWMN_1337	dihydrofolate reductase	65172	39499	32978	26442	35371	46347	42853	26392	21825	31909	26008	24928	H
NWMN_1338	thymidylate synthase	45785	14781	15406	9983	13629	21610	25895	11420	11355	12432	10966	12546	F
NWMN_1339	hypothetical protein	7358	9871	4420	6406	8767	4962	6743	5797	4385	8473	7324	3525
NWMN_1340	hypothetical protein	6764.29	8797.43	3923.57	5648.43	7594.86	3596	5710	5216	3166.86	7875.57	6625	2731	C
NWMN_1341	hypothetical protein	8735.5	13232.5	4421	7901	12173.5	6333.5	7570.5	7212.5	4410	9828.5	8503	3485.5	O
NWMN_1342	hypothetical protein	517.4	369.5	155.6	413.2	360.1	188.9	321.6	260.6	152	517.5	281.6	139.4	S
NWMN_1343	hypothetical protein	656.5	1035	253.4	617.4	593.4	165.8	477.2	465	229.1	717.9	427.3	131.3	L
NWMN_1344	cell wall associated fibronectin-binding protein	267.414	263.471	163.357	146.886	171.957	184.486	209.743	179.414	154.043	269.014	165.971	188.757
NWMN_1345	hypothetical protein	585.8	416.1	124	251.1	333.4	215.9	308.1	2.026	198.5	106.9	416.7	254.2
NWMN_1346	major facilitator transporter	2104.57	1973.14	1644	656.957	880.229	883.914	2344.29	1855.71	2429.29	3364.86	4223.86	3705.14	G
NWMN_1347	amino acid permease	5639	4678.5	4745	1406.4	2694.5	2335.5	5562.5	5627	7217	7725.5	8782	10018	E
NWMN_1348	threonine dehydratase	8103	7458	8935	1909	3867	3886	5017	8906	11526	11417	14753	17932	E
NWMN_1349	alanine dehydrogenase	8763	8941	7673	2025	4502	3759	6912	9248	11050	12205	16489	17118	E
NWMN_1350	5'-3' exonuclease	3246	4737	2423	2407	2906	2267	3422	2538	2644	4746	4013	2485	L
NWMN_1351	hypothetical protein	3882	3924	2059	1994	2387	2199	3298	2290	2061	4630	2897	1781	R
NWMN_1352	hypothetical protein	308.4	113.6	90.66	164	173.8	115.7	225.7	136.1	144.4	245.9	170.4	175.3	S
NWMN_1353	hypothetical protein	935	1068	349.3	571.5	1104	781.1	831.1	631.7	399.3	1131	692.8	425.3
NWMN_1354	hypothetical protein	588.4	412.4	143.8	454.3	522.3	213.8	500	302	153.8	497.8	336.4	174.2	L
NWMN_1355	hypothetical protein	24266	29793	34397	28862	22229	17476	65155	39823	38904	37656	37140	32771
NWMN_1357	hypothetical protein	24601	24601	12328	18550	21057	15406	27257	20093	14313	26179	20993	14339	S
NWMN_1358	hypothetical protein	16290	23100	6850	15317	19769	6938	16058	13370	6775	12804	19064	5927
NWMN_1360	Holliday junction-specific endonuclease	12228	10438	5112	10920	14896	13164	6278	8004	6135	10250	11112	8674	R
NWMN_1361	penicillin-binding protein 2	18316.5	19760	10070	16737.5	26655.5	17788	10979.5	14554.5	10889	15853.5	20459.5	14289	M
NWMN_1362	hypothetical protein	1912	2976	1150	1823	2131	1208	2015	1858	1092	2878	2067	1065
NWMN_1363	endonuclease III	1501	1735	838.6	1481	1861	1063	1517	1284	691.2	2328	1659	843.2	L
NWMN_1364	DNA replication protein DnaD	5278	6539	1742	4998	5584	3111	3890	3196	1860	5497	3873	1988	L
NWMN_1365	asparaginyl-tRNA synthetase	4688	5098.86	1650.14	5618.14	5649.86	1975.86	6174.86	3790.29	1574.71	6664.86	4938.43	1343.14	J
NWMN_1366	DnaQ family exonuclease/DinG family helicase	2256.6	2710.2	1183.8	1524.64	2361.6	907.32	2037.8	1941.4	1238.6	2709.6	2224.8	895.72	L
NWMN_1367	BirA bifunctional protein	2327.5	3534.5	1083.5	1879.5	2528.5	911.95	1854	2092.5	1070.7	3013.5	2370	719.8	H
NWMN_1368	tRNA CCA-pyrophosphorylase	833.8	957.9	432.4	496.7	807.3	475.4	591.3	648.5	372.6	951.1	765.6	359.1	J
NWMN_1369	glycosyl transferase group 1	1569.29	1698.86	739.929	1224.57	1327.57	870.286	1122.54	1007.94	646.6	1457.29	1312.43	797.943	M
NWMN_1370	hypothetical protein	747.2	853.35	267.4	692	722.9	310.4	543.5	471.25	311.6	776.2	558.95	236.5	R
NWMN_1371	hypothetical protein	29323	37220	7773	25723	26730	20108	27293	1685	21456	23651	36200	21734	R
NWMN_1372	hypothetical protein	1857	1778	1029	1304	1703	1454	1499	877.6	1081	2010	1672	980	S
NWMN_1373	hypothetical protein	3018	2603	1217	1254	2013	1682	1590	1400	1075	2195	1965	1024	S
NWMN_1374	hypothetical protein	4692.57	4236.29	1767.4	2505.71	3802.29	2667.57	2691.86	788.937	2248.29	2162.34	3527.14	2115.29	R
NWMN_1375	3-phosphoshikimate 1-carboxyvinyltransferase	3324	2938	1687	1763	2919	2193	1752	2123	1656	2688	2872	1520	E
NWMN_1376	3-dehydroquinate synthase	3543	3655	1346	2818	3669	1634	1810	2427	1380	3058	3133	1058	E
NWMN_1377	chorismate synthase	3280	4085	1102	2588	4022	1778	1847	2235	976.8	2667	2683	778.1	E
NWMN_1378	nucleoside diphosphate kinase	1387.8	1594.1	457.265	1645.15	1174.35	215.89	1822.45	781.65	521.685	1650.25	900.38	241.855	F
NWMN_1379	heptaprenyl diphosphate syntase component II	5102	5876	2739	5917	5415	2163	5435	3748	2073	7962	4484	1306	H
NWMN_1380	ubiquinone/menaquinone biosynthesis methyltransferase	7435	12281	4941	11058	10332	4581	9264	6805	4131	13380	7702	3083	H
NWMN_1381	hypothetical protein	9783	10792	3626	10144	10457	3608	8686	6036	3216	11778	7124	2228
NWMN_1382	DNA-binding protein HU	62682	65174	65151	65183	49954	30650	65163	65185	65182	65178	65178	65178	L
NWMN_1383	glycerol-3-phosphate dehydrogenase NAD-dependent	5605.43	7158.43	3592.71	5294.29	7201.14	4304.29	4658.86	5035.43	2682.71	7984.43	6099.57	2650.86	C
NWMN_1384	GTP-binding protein EngA	5354	6824	1913	5474	6504	2904	4188	3973	1965	6633	4302	1581	R
NWMN_1385	30S ribosomal protein S1	21428.3	31736.1	17688.4	15049.3	18607.7	12567.1	30435.4	27156.7	21993.3	28134.7	30588	19533.6	J
NWMN_1386	cytidylate kinase	1466	2254	654.8	1375	1723	665.6	1568	1322	667.8	1975	1369	390	F
NWMN_1387	L-asparaginase	227	200.8	76.94	145	295.3	98.52	142.2	157.5	66.95	384.5	118.8	45.02	E
NWMN_1388	pyridine nucleotide-disulphide oxidoreductase	1019	1288	503.8	1032	1153	625.1	713.2	630.5	412.4	971.3	754	482.8	O
NWMN_1389	elastin binding protein	65176.3	65171.4	51444.9	34540.4	53115.4	52794.7	62252.9	58464.7	44150	45950.3	54990.6	42768.3
NWMN_1390	ATP-dependent DNA helicase RecQ	9906	6529	3476	4646	6800	6296	5955	5091	3479	5482	4687	3232	L
NWMN_1391	hypothetical protein	3237	3265	975.5	1929	2431	1105	2034	1983	1204	3002	2438	1047	S
NWMN_1392	ferredoxin	2836.5	3748	1725.5	2835	3517.5	2312.5	2010	2432.5	1916.5	3438	3463	1529.5	C
NWMN_1393	hypothetical protein	2973.09	4699.09	1734.09	4086.91	3529.18	1453.82	3936.36	2469.18	1686.91	4074	3272.09	1210.36	S
NWMN_1394	hypothetical protein	422.8	453.7	127.8	304.6	427.3	256.2	408.3	281.1	276.1	572.2	355.4	221
NWMN_1397	hypothetical protein	998.28	1485.8	528.28	1359.42	2177.8	1095.74	954.46	1009.84	549.32	934.16	1014.76	400.5
NWMN_1398	hypothetical protein	1526	2560	794.7	2618	4865	2008	1125	1300	981.7	990.9	1644	610.5
NWMN_1399	staphylococcal respiratory response protein SrrB	7232.67	6985.67	3136.33	5039.33	7055	3500.33	5219.67	4829.33	3019.67	7318.67	6226.67	2744.67	T
NWMN_1400	DNA-binding response regulator SsrA	19284	16149	9682	16183	16003	9951	16937	12356	10611	24063	15671	9369	T
NWMN_1401	ribosomal large subunit pseudouridine synthase B	4859	4796	2500	3718	4899	2773	3817	2927	1982	5526	3750	1839	J
NWMN_1402	segregation and condensation protein B	5267.57	5527.43	2789.43	4077.86	5238.71	3262.57	4023	3547.71	2468.43	5732.14	4361.57	2170.57	K
NWMN_1403	hypothetical protein	5809	5805	2836	4536	5479	3766	3867	3699	2371	5891	3974	2051	S
NWMN_1404	hypothetical protein	934.5	1388	139	898.7	1033	499.9	700.7	577	281.8	485.8	734.3	218.5	S
NWMN_1405	integrase/recombinase XerD	3035	4188	1603	2770	3019	1384	3422	2408	1581	4701	3619	1499	L
NWMN_1406	transcriptional regulator Fur	12270	13991	5426	9062	10727	7471	9105	8402	5716	13542	11106	5962	P
NWMN_1407	NUDIX domain-containing protein	2741.43	4008.86	1298.29	2299.71	3246.71	1474.43	2273.86	1823.71	1321.43	2366.57	2871.43	1071.71	L
NWMN_1408	aldo/keto reductase	1778.14	2101.14	998.086	1701	2280.86	1177.54	1463.71	1569.29	967.343	2093.29	2051.57	950.686	C
NWMN_1409	short-chain oxidoreductase	3977	5142	1903	2898	4250	1865	3182	2730	1669	3383	3243	1067	R
NWMN_1410	pyrroline-5-carboxylate reductase	16823	26590	8590	11273	18240	9507	12064	14350	7182	19076	16758	5308	E
NWMN_1411	AtsA/ElaC	1971	2528	689	1885	1872	516.8	1999	1327	704.3	2421	1712	466.9	R
NWMN_1412	glucose-6-phosphate 1-dehydrogenase	9010	13826	6508	6145	9617	6323	8048	8680	5502	12460	9544	4622	G
NWMN_1413	transcriptional regulator AraC	5835	8431	4155	4921	7622	4152	6693	6026	4018	7839	6153	2826	K
NWMN_1414	alpha-D-1,4-glucosidase	3102	2893	1679	1829	2501	1486	2497	1883	1619	2814	2437	1658	G
NWMN_1415	maltose operon transcriptional repressor	3260	3882	1188	2685	3288	1230	2132	2321	1091	3279	2886	922.4	K
NWMN_1416	glyoxalase	2938	5480	2223	3469	3602	1926	2689	2921	2092	3219	4185	1578	E
NWMN_1417	6-phosphogluconate dehydrogenase	12610	21224.4	8283.14	11534	17998.7	10792.7	11605.1	12713	7973.14	13609.7	13773	6856	G
NWMN_1418	peptidase T	7346	13503	5822	5550	9274	6188	5795	6641	5089	6857	7402	4163	E
NWMN_1419	hypothetical protein	2358	3391	1579	2315	3142	1586	2395	2067	1413	2731	2148	994.5	S
NWMN_1420	hypothetical protein	1075	1264	523	1116	1386	680.5	1096	912.4	482.4	1153	882.6	372
NWMN_1421	2-oxoisovalerate dehydrogenase E2 component dihydrolipoamide acetyltransferase	2846	3540	2365	1906	2437	2196	3489	2532	2550	3893	3429	2597	C
NWMN_1422	2-oxoisovalerate dehydrogenase E1 component beta subunit	3736	4360	3028	2243	3372	2812	3973	3011	2830	4294	4249	3649	C
NWMN_1423	2-oxoisovalerate dehydrogenase E1 component alpha subunit	6765	5474	1720	2775	4345	3624	5465	2757	2997	4511	5127	4033	C
NWMN_1424	dihydrolipoamide dehydrogenase	8653	7998	4579	3457	6298	4437	7548	5520	4006	7129	8081	4760	C
NWMN_1425	DNA repair protein RecN	6267	6553	1278	3269	4581	2483	4744	2623	3600	1407	4198	2716	L
NWMN_1426	arginine repressor	5248	7129	3431	3641	5077	1522	3832	3522	3195	3463	5085	1871	K
NWMN_1427	geranyltranstransferase	6861	8637	2815	4355	6549	1963	5397	4695	3023	9076	7221	2574	H
NWMN_1428	exodeoxyribonuclease VII large subunit	6002	6123	2526	3305	5480	2574	3702	3779	2105	5889	4615	1893	L
NWMN_1429	transcription antitermination protein NusB	6889	8995	3094	5986	7488	3456	5428	4989	3242	8247	6826	2996	K
NWMN_1430	hypothetical protein	4800	5860	2295	4072	4943	2410	3727	3859	2376	6351	4353	1987	S
NWMN_1431	acetyl-CoA carboxylase biotin carboxylase subunit	5381	5683	1783	5432	7169	2843	3748	3887	1367	5769	4551	1466	I
NWMN_1432	acetyl-CoA carboxylase biotin carboxyl carrier protein	10503	10197	2637	9949	10722	4525	7148	6360	2690	9266	7959	2745	I
NWMN_1433	elongation factor P	2706.14	3344.86	1863.57	1951.14	2927.71	2862	3616.14	1527.31	2064.14	4069.67	2699.43	2383	J
NWMN_1434	proline dipeptidase	8480	13282	3573	7193	9879	3038	8463	8040	3630	12508	11487	3071	E
NWMN_1435	hypothetical protein	3544.71	6089.57	1824.86	2831.57	4247.43	1894.14	3204.57	3204.57	2109.43	4433.43	3600.71	1229.43
NWMN_1437	biotin/lipoate A/B protein ligase	3149	4615	1748	2742	3280	1756	2992	2253	1584	3388	2973	1261	H
NWMN_1438	rhodanese-like domain-containing protein	3372	5629	2055	2956	4827	3137	4078	3302	2806	4134	4345	2110	P
NWMN_1439	glycine dehydrogenase subunit 2	2499	2570	1439	1689	1991	1322	2619	1930	1471	2189	2531	1324	E
NWMN_1440	glycine dehydrogenase subunit 1	2426	2581	1398	1670	2005	1258	3309	1806	1278	2103	2327	1242	E
NWMN_1441	glycine cleavage system aminomethyltransferase T	2464	3079	1144	2035	2204	1300	3151	1749	1175	2633	2390	950.2	E
NWMN_1442	shikimate kinase	5137	5830	2125	4802	5164	2785	4316	392.9	2068	3836	4555	1455	E
NWMN_1443	hypothetical protein	544	454.1	257.6	340.1	414.8	288.1	357.4	287.1	205.7	656.7	390.2	229.9	R
NWMN_1444	hypothetical protein	354.2	353.4	128.2	281.7	275.2	135.7	349.9	183.4	140.9	294.8	246.7	104.6
NWMN_1445	late competance protein comGD	252	217.5	92.18	175.8	175.6	75.23	160.8	132.3	88.88	345.4	189.4	88.43	N
NWMN_1446	competence protein ComGC-like protein	244.2	209.8	121.5	145.9	189.8	105.1	178.3	152.8	102.8	222.6	174.7	106.7	U
NWMN_1447	competence protein ComGB-like protein	95.082	113.25	36.394	78.2302	88.062	43.826	59.77	68.692	34.4476	103.998	104.364	31.592	N
NWMN_1448	competence protein ComGA-like protein	157.3	173.3	74.4	123.4	118	79.3	160.5	112.3	87.49	150.1	123.5	89.45	N
NWMN_1449	metallo-beta-lactamase super	4422	3762	2691	2269	3511	3472	6323	2469	1816	4128	3000	2422	R
NWMN_1450	hypothetical protein	4966	4300	1228	2411	3555	3458	5621	77.11	2545	1768	2715	2138	S
NWMN_1451	glucokinase	22476	14861	10215	9677	10864	11550	19948	8696	8127	17542	12701	10115	K
NWMN_1452	rhomboid	9268	8850.5	4964.5	5903.5	6217	4104	6643.5	5135	5541	9846.5	7244.5	4586.5	R
NWMN_1453	5-formyltetrahydrofolate cyclo-ligase	6870.68	7386.44	5112.94	4677.49	5081.22	4582.91	4921.2	2870.8	5335.62	8086.13	5634.93	4516.41	H
NWMN_1454	50S ribosomal protein L33	1669	2013	902.6	1510	1981	937.9	2127	1565	1117	1457	2449	911.4	J
NWMN_1455	penicillin-binding protein 3	8058	9748	3136	6877	8653	3696	5234	6447	3924	8161	7806	2812	M
NWMN_1456	superoxide dismutase Mn	16565	17790	17688	16431	12095	11830	27498	18075	17082	21819	19924	18681	P
NWMN_1457	zinc-specific metalloregulatory protein	256.3	402.9	102.2	186.3	331.7	186.8	197	303.1	98.88	222.4	218.3	94.37	P
NWMN_1458	ABC transporter permease	430.1	382	221.3	398.2	370.8	209.1	379.8	272	156.4	571.8	299.3	162.5	P
NWMN_1459	ABC transporter	629.1	516.9	210.3	595.3	488.9	199.9	483	339.2	218.2	730.5	482	246.6	P
NWMN_1460	endonuclease IV	3594	3504	2049	2817	4144	2673	2661	3377	1934	3690	3807	1647	L
NWMN_1461	ATP-dependent RNA helicase DEAD/DEAH box	6754	5820	1678	4561	6424	3313	3393	0.01	1616	2865	3894	1851	L
NWMN_1462	hypothetical protein	5154	5189	3013	4110	5010	3805	4822	3492	2554	4673	3965	2636	S
NWMN_1463	hypothetical protein	3957.71	3143.14	1773.03	2445.64	2942.83	2036.57	3508.57	2023.37	1210.23	2942.57	2356.29	1321.07	R
NWMN_1464	RNA polymerase sigma factor RpoD	9521	6063	5200	4301	4829	4392	11311	4979	5078	6033	5480	4336	K
NWMN_1465	DNA primase	12024.5	14607	7061.5	7259	10408	6872	9298	8864.5	6563	12829.5	11779	5814.5	L
NWMN_1466	hypothetical protein	6100	7477	1447	5202	5705	2685	4622	3048	2744	871.8	3093	2451	S
NWMN_1467	CBS domain-containing protein	3802	4703	1938	3613	4266	2562	2558	2838	1810	3760	2845	1335	R
NWMN_1468	glycyl-tRNA synthetase	13384	14602	8410	13438	14166	8860	7195	13251	9089	18036	17705	8526	J
NWMN_1469	DNA repair protein RecO	2260.71	2724	1695.86	1356	2027.86	1715.86	3263.29	1206.17	1390.57	1792.14	1759.57	1304.57	L
NWMN_1470	GTP-binding protein Era	9625	10462	6388.5	6280.5	8378	7157.5	10142	5906.5	4604	8899	6491.5	5178.5	R
NWMN_1471	cytidine deaminase	9601	9488	6245	5769	6945	7292	8225	4485	5125	8159	5551	5189	F
NWMN_1472	diacylglycerol kinase	12798	11250	8078	8246	10561	10247	9186	6663	6082	10797	7532	6312	M
NWMN_1473	hypothetical protein	9436	8084	1935	4955	6850	6224	7678	683.2	4186	737.8	1429	4030	R
NWMN_1474	phosphate starvation-induced protein PhoH-like protein	15464	14965	8018	10261	12634	12268	13161	8281	8161	12850	8537	7509	T
NWMN_1475	hypothetical protein	3614	5162	4272	2715	4845	3305	6446	6579	4295	5002	6271	4227
NWMN_1476	hypothetical protein	35882	45633	27048	25692	36138	26175	32815	36126	27368	34914	47470	30393	S
NWMN_1477	hypothetical protein	38360.3	49691.4	27663.4	25117.4	38121.7	31313.7	32542	38544.4	29216.4	35196.7	48928.7	32069.7	O
NWMN_1478	30S ribosomal protein S21	5598	6962	4588	6352	6489	3927	9646	6452	6652	7933	9241	5296	J
NWMN_1479	hypothetical protein	5226	5865	2109	5604	7430	3062	3072	4880	1916	5377	5539	1773	J
NWMN_1480	hypothetical protein	7432	7677	2259	6761	8352	3320	4071	4815	1748	5747	5236	1542	S
NWMN_1481	ribosomal protein L11 methyltransferase	1428	1681	909.7	1030	1563	1044	1069	1161	845.2	1380	1658	1005	J
NWMN_1482	DnaJ protein	4437	5274	2312	3056	4987	2730	2915	3367	2093	3713	4470	2231	O
NWMN_1483	DnaK protein	9477.71	13182.1	6860.43	5650.43	9710.43	6208.29	8433	8009.43	6671.86	9296.57	10657.1	7224.86	O
NWMN_1484	Hsp-70 cofactor GrpE protein	7694	10920.5	4278.5	4711.5	7780	3902.5	6024	5721	3910	7205.5	6835	3625.5	O
NWMN_1485	heat-inducible transcription repressor HrcA	9145	11774	6175	3952	7934	5850	7416	7004	6158	8394	8101	4999	K
NWMN_1486	coproporphyrinogen III oxidase	299.6	312.5	134.1	199	259.7	114.4	265.1	212.3	153.2	356.4	310.8	129	H
NWMN_1487	GTP-binding protein LepA	2479	2223	985.6	1758	1745	824.6	2325	1606	950.9	2871	2410	960.9	M
NWMN_1488	30S ribosomal protein S20	3439	3831	1663	2349	3830	2941	3721	2581	2244	4385	3653	2264	J
NWMN_1489	DNA polymerase III subunit delta	574.7	764.9	172.8	323	544.3	248.7	483.3	307	203.7	585.8	396.6	179.3	L
NWMN_1490	DNA internalization-related competence protein ComEC/Rec2	104	154.1	64.89	56.4	80.11	87.46	80.6	96.52	57.11	85.36	129.6	76.79	R
NWMN_1491	competence protein ComEB required for DNA binding and uptake	927.1	1173	574	635.1	952.7	669.9	877.4	706.8	526.8	873.4	803.2	418.8	F
NWMN_1492	competence protein ComEA	516.4	474.1	194.3	346.7	308.7	226.6	477	293.2	193.9	501.3	399.1	187.6	L
NWMN_1493	hypothetical protein	2523	1871	1190	1628	1581	1306	2209	535.9	1019	1351	1422	963.8	Q
NWMN_1494	hypothetical protein	2655	2015	1324	1773	1695	1515	2520	1532	1149	2317	1508	1035	S
NWMN_1495	hypothetical protein	5059	3207	1314	3219	3303	2959	4396	1697	2098	3467	2969	2376	H
NWMN_1496	nicotinate (nicotinamide) nucleotide adenylyltransferase	3688.57	3374.71	1535.57	3228.43	3538	2045.86	2808.43	2346.86	1610.86	4007.14	3138.71	1577.57	H
NWMN_1497	hypothetical protein	3416	3225	1303	2438	3517	1938	2058	2192	1481	3381	2476	1354	J
NWMN_1498	shikimate 5-dehydrogenase	4149	4043.14	1684	3786.43	4513.57	2259.86	2719	2845	1774.14	4509.29	3452.29	1640.43	E
NWMN_1499	GTP-binding protein YqeH	3042	2831	1179	3177	3630	1712	2029	2047	1108	3419	2668	1210	R
NWMN_1500	HAD superfamily hydrolase	5051.14	4316.29	1953.57	5021.71	5312	2749.57	3346	3048.14	1622.71	5103.29	3792.86	1724.43	R
NWMN_1501	MTA/SAH nucleosidase	3215	2846	1084	3175	3495	1845	1935	2071	973.2	4167	2291	1058	F
NWMN_1502	hypothetical protein	193.4	181.8	42.3	165.1	163.5	115.1	124.2	254.8	93.49	162.1	141	66.6
NWMN_1503	enterotoxin	229.85	326	109.98	190.35	217.85	161.31	155.65	174.45	113.545	242.8	206	99.645
NWMN_1504	hypothetical protein	857.457	835.457	276.729	775.314	532.286	247.529	831.114	501.643	301.243	1060.49	695.086	194.271	S
NWMN_1505	hypothetical protein	1365	1366	886.9	333.9	470.3	380	1779	992.2	1162	2177	1797	1226	P
NWMN_1506	hypothetical protein	6778	6094	2823	1358	1994	1627	4280	4024	3815	7301	6789	4223	R
NWMN_1507	acetyl-CoA carboxylase biotin carboxylase	6019	5935	2733	1421	1907	1297	3750	4399	3399	7314	7255	3983	I
NWMN_1508	acetyl-CoA carboxylase biotin carboxyl carrier protein	5262	7124	2380	1760	2126	1151	4215	1324	2943	1368	7884	3342	I
NWMN_1509	hypothetical protein	3869	5202	1757	1333	1704	945.7	3243	3823	2416	7035	5612	2432	E
NWMN_1510	hypothetical protein	3597.43	4148	1031.7	1394.86	1217	540.286	3518.86	3012	1568.14	5910.57	5489.14	1786.43	E
NWMN_1511	transcription elongation factor	341.3	681.1	233.5	266.2	564	249.6	287.2	303.5	219	267.4	340.5	159.3	K
NWMN_1512	uridine kinase	4237	5824	1976	3796	4768	1874	3986	3371	2232	4023	5286	1997	F
NWMN_1513	peptidase U32	4694	3316	2357	2361	3252	2847	3679	2710	1808	3374	3421	2434	O
NWMN_1514	peptidase U32	4269	2744	542.3	1932	1990	1833	2872	1274	1254	580	1999	1319	O
NWMN_1515	O-methyltransferase	2498	2048	410.9	1485	1390	403.6	1437	1010	492.6	1936	1274	346.3	R
NWMN_1516	hypothetical protein	764.7	865.6	539.7	706	939.2	984	820.5	646.2	626.6	885.9	773	584.8	S
NWMN_1517	hypothetical protein	9604	14538	2403	12693	12575	6149	10053	7754	6140	2391	7846	5172	L
NWMN_1518	hypothetical protein	11292	14722	2710	12256	12503	6643	11158	226.3	5999	6141	7632	4882	S
NWMN_1519	alanyl-tRNA synthetase	2584	3384	1994	2947	1020	2414	2054	2498	2059	3605	3014	1569	J
NWMN_1520	helicase RecD/TraA	2710	3630	1714	1723	2208	1266	2560	1997	1652	3057	2852	1484	L
NWMN_1521	TPR domain-containing protein	1465	1855	495.5	1088	1282	368.6	1148	963.5	559.2	1565	1096	350.4	R
NWMN_1522	hypothetical protein	4693	4700	1091	3071	4084	2567	3482	3106	2301	2932	3784	2093
NWMN_1523	tRNA (5-methylaminomethyl-2-thiouridylate)- methyltransferase	4243	3735	2554	2856	3700	2696	3081	2587	2145	3093	3168	2059	J
NWMN_1524	aminotransferase class V	6657	6854	3177	5159	7370	4301	4375	4500	3077	5346	4514	2499	E
NWMN_1525	luciferase	578.4	985.1	306.4	566.3	1089	341.2	347.7	535.4	234.8	429.8	511.1	181.5	C
NWMN_1528	Rrf2	7339.71	11093.4	2768.14	7140	9008.14	3412.86	5673.57	6443.57	3988.43	8668.57	7599	2165	K
NWMN_1529	recombination factor protein RarA	5738	8852	3591	4510	5916	3777	4826	4918	3756	6498	6256	2887	L
NWMN_1530	hypothetical protein	3519	3411	1166	2838	2653	1608	3245	202	1442	2058	2904	1560	H
NWMN_1531	hypothetical protein	20746	21007	33726	22987	22814	12800	48008	27723	34160	35642	28570	24514
NWMN_1532	aspartyl-tRNA synthetase	1139.26	1765.71	916.029	990.257	1331.77	866.143	1476.14	1233.2	963.886	1645.26	1557.2	969.914	J
NWMN_1533	histidyl-tRNA synthetase	2347	2994	760.3	1730	2178	1124	2101	1446	790.3	2262	1584	618.3	J
NWMN_1534	N-acetylmuramoyl-L-alanine amidase	2577.2	4422.6	1457.44	2217.2	2599.8	722.48	2326.6	2411.2	1189.96	3325.4	3145.8	822.4	M
NWMN_1535	D-tyrosyl-tRNA deacylase	8584	12045	6795	7602	9480	4815	8513	9430	6206	10666	10079	4602	J
NWMN_1536	GTP pyrophosphokinase	13010.3	14609.7	6417.67	9033.33	11082.3	6102.33	8910	9967	5903	12286	12002.7	4628.33	T
NWMN_1537	adenine phosphoribosyltransferase	808.629	780.986	544.414	632	655.743	415	781.7	435.114	444.029	331.414	766.571	331.571	F
NWMN_1538	single-stranded-DNA-specific exonuclease RecJ	1783	1797	1107	947.4	1364	1098	1307	1442	956.2	1829	1797	784.6	L
NWMN_1539	bifunctional preprotein translocase subunit SecD/SecF	2694	3650	1665	2739	3629	2065	2325	2379	1429	3609	2729	1250	U
NWMN_1540	preprotein translocase YajC subunit	2846	3799	1299	1987	3946	3338	2583	1826	1648	2714	2515	1592	U
NWMN_1541	queuine tRNA-ribosyltransferase	5072.71	3614.29	1937	3136.71	3854.86	2309.71	3630	2776.43	2148.71	4152.14	3934.29	2420.57	J
NWMN_1542	S-adenosylmethionine:tRNA ribosyltransferase-isomerase	7004.71	4831.29	2650	4027.14	5672.71	3648	3676.14	3594.86	2695.57	5603.71	4964.86	3085.14	J
NWMN_1543	Holliday junction DNA helicase B	10748	7843.5	4326	6948	9293.5	6534.5	5351	4236	4662	8516.5	7944.5	5357.5	L
NWMN_1544	Holliday junction DNA helicase RuvA	11257	7192	4195	7651	9294	6529	6142	6340	4809	9571	8573	5444	L
NWMN_1545	hypothetical protein	8754	7259	3505	6404	8532	6003	4747	5481	4069	7760	7382	4637	R
NWMN_1546	GTPase ObgE	10029	7899	3676	6892	8596	6064	5206	5917	3866	8462	7694	4772	R
NWMN_1547	50S ribosomal protein L27	5973	6406	4346	5842	6781	5506	7204	4772	5425	9460	7003	5462	J
NWMN_1548	hypothetical protein	9456	7963	3990	8523	8915	6922	9758	5570	4902	13806	8690	5247	J
NWMN_1549	50S ribosomal protein L21	7785	6421	3362	7836	7634	5176	8205	5014	3668	11438	6827	3907	J
NWMN_1550	rod shape-determining protein MreD	2695	3464	1485	2425	3151	1649	2908	2353	1402	4143	2889	1327	M
NWMN_1551	rod shape-determining protein MreC	3222.5	3380.5	1357.5	3209.5	3414	1616.5	3467	2173.5	1329.5	4206	2776.5	1283	M
NWMN_1552	hypothetical protein	2037	2866	815.8	5538	5073	2188	1570	1703	1029	1413	2861	1044
NWMN_1553	hypothetical protein	300.6	467.5	100.2	471.2	738.5	328.1	241.7	229.6	133.1	317.2	290.6	116.2
NWMN_1554	hypothetical protein	417	565.8	203	391.7	551.7	418.5	307.3	253.7	256.3	404	380	236.9
NWMN_1555	DNA repair protein RadC	136.7	385.1	167.1	86.37	186.7	96.57	175.6	174.6	138.6	141	203.4	123.3	L
NWMN_1556	type III leader peptidase	212.433	455.967	162.933	123.3	178.033	119.713	173.333	291.8	177.933	390.067	244.1	129.073	N
NWMN_1557	folylpolyglutamate synthase/dihydrofolate synthase	5364	5946	3560	4723	5408	4931	5626	4130	3631	7425	4309	4325	H
NWMN_1558	valyl-tRNA synthetase	3866	3881	2185	3303	3491	3730	3949	2956	2223	5229	3118	3004	J
NWMN_1559	DNA-3-methyladenine glycosidase	4482	5809	1347	3397	3872	2130	3751	2273	1926	3654	4172	1549	L
NWMN_1560	ammonia monooxygenase	4319.29	4111.29	2726.39	3059.11	3582.43	3242.87	3684.57	3504.73	3149	5062.29	4627.71	3574.86	R
NWMN_1561	glutamate-1-semialdehyde aminotransferase	12520	10023	5510	7015	12460	6859	7359	7261	4744	8531	8664	5492	H
NWMN_1562	delta-aminolevulinic acid dehydratase	6812.43	6213.29	3477.57	4724.57	6970.14	4694	5188.14	4335.43	3373.43	5444.86	5855.14	3666.43	H
NWMN_1563	uroporphyrinogen III synthase	5464	3645	2466	2884	4879	3132	3898	2729	2217	3571	3062	2081	H
NWMN_1564	porphobilinogen deaminase	10141	6492	4366	5266	7599	4179	8494	4715	4314	8282	6190	3664	H
NWMN_1565	HemA concentration negative effector HemX	9906	6203.5	4403	4959.5	6244.5	4110.5	7053.5	4713	4547.5	9245.5	6584.5	3795	O
NWMN_1566	glutamyl-tRNA reductase	27993.7	22144.9	18080.3	19863.4	23207.3	18059.3	29918.7	18871.4	19751	29190.3	18497	14179.7	H
NWMN_1567	GTPase EngB	2061	1873	476.4	1673	1852	783.8	1285	1026	670.2	2092	1290	597.5	R
NWMN_1568	ATP-dependent protease ATP-binding subunit	2518	4396	1400	3704	5982	1440	3324	3055	1449	3979	3421	1260	O
NWMN_1569	trigger factor	9100	11983	4260	9844	10216	3522	10420	7764	4336	12101	9337	3134	O
NWMN_1570	hypothetical protein	4229	6486	1862	3702	3934	1711	3290	3443	1303	4902	4022	1165	R
NWMN_1571	MutT/nudix	5277.71	7001	1967.57	4517.57	5830.57	2113.86	3397	3816.86	1656.86	5225.71	4544.43	1168.29	R
NWMN_1572	50S ribosomal protein L20	6504	4807	1565	3641	5214	2702	5981	1905	1704	5584	3332	1771	J
NWMN_1573	50S ribosomal protein L35	15575	10908	4012	11110	13514	6141	14402	3213	5054	8927	10158	4694	J
NWMN_1574	translation initiation factor IF-3	22779	13430	1811	15786	17460	8750	13901	7598	5256	11128	12237	5582	J
NWMN_1575	lysine-specific permease	9089	2990.86	3427.14	2478.29	3097.86	5958.14	5591.86	2388.29	3377	2775.43	2029.57	3558.86	E
NWMN_1576	threonyl-tRNA synthetase	12089	9597	8206	4245	6757	10040	6937	5772	7897	9245	8269	10422	J
NWMN_1577	primosomal protein DnaI	8754	10659	1850	6443	7221	5194	6318	2135	4127	5892	7830	4196	L
NWMN_1578	replication initiation and membrane attachment protein	9332	12582	5931	7495	9141	5379	6928	6571	4877	11392	9349	4903	L
NWMN_1579	transcriptional regulator NrdR	12826	17554	6294	11935	13569	7707	9285	9005	5704	13702	11043	4264	K
NWMN_1580	glyceraldehyde 3-phosphate dehydrogenase 2	6775.57	5818.43	4264.14	7965	6420.86	4811.43	14733.6	5004.14	3143.86	6805.71	2355.86	2815.71	G
NWMN_1581	dephospho-CoA kinase	1598	1939	1064	961.5	1718	1749	1488	1076	1069	1411	1371	1150	H
NWMN_1582	formamidopyrimidine-DNA glycosylase	4229	5799	3318	2942	4246	2883	3199	3535	2713	4638	4554	2349	L
NWMN_1583	DNA polymerase I	5782	7646	3660	4169	5502	3187	5177	4206	2832	5735	5305	2713	L
NWMN_1584	hypothetical protein	5217	7049	2970	2689	3223	1720	4564	3818	3510	7817	5884	3023
NWMN_1585	histidine kinase	4887	3563	4163	2981	3582	4476	7242	2434	3206	3545	2147	2554	T
NWMN_1586	alkaline phosphatase synthesis transcriptional regulatory protein	12627	10352	8227	7763	8855	8660	11238	6337	7526	8393	5959	5844	T
NWMN_1587	isocitrate dehydrogenase	13194	37413	10432	14563	19310	9591	13219	17820	10523	25399	25885	11020	C
NWMN_1588	methylcitrate synthase	8504.2	24950	3922.4	10178.2	13516	4265.2	9054.6	10605.2	4157.2	15743.6	13727.6	3627.4	C
NWMN_1589	D-serine/D-alanine/glycine transporter	7685	9621	4089	3976	7514	3689	7950	7064	5180	7772	8572	3830	E
NWMN_1592	pyruvate kinase	5158	6233	4077	3498	4923	3930	5805	4360	3929	6033	5277	3500	G
NWMN_1593	6-phosphofructokinase	10319	14610	6718	8829	12882	7665	8834	8665	5895	10758	9815	5163	G
NWMN_1594	acetyl-CoA carboxylase carboxyltransferase subunit alpha	3920	4416	2538	3018	4082	2666	3056	3347	2441	4717	4414	2453	I
NWMN_1595	acetyl-CoA carboxylase subunit beta	2366	1718	1391	1404	2519	1633	1432	2220	1291	3042	2779	1399	I
NWMN_1596	NADP-dependent malic enzyme	3918	4230	1286	3107	4584	1090	2889	3189	1060	3181	3738	943.7	C
NWMN_1597	DNA polymerase III alpha subunit super	2822.4	3627.63	1890.74	1531.34	2412.57	1993.89	2763.57	501.643	2163	466.071	3117.29	2051.31	L
NWMN_1598	hypothetical protein	3351	3312	1419	1792	2528	1466	2468	1627	1552	1654	2451	1447	R
NWMN_1599	CBS domain-containing protein	5430.57	6328.86	2135.14	3563.57	4268.29	2368	3572.43	3248.86	2097.71	5633.14	3936.86	1832.14	K
NWMN_1600	universal stress protein	9425	9179	7701	7713	9248	9102	11546	6739	6599	8003	7833	6727	T
NWMN_1601	metallo-beta-lactamase super	16273	17926	18525	12916	14706	16752	31325	13512	16478	15351	12042	17110	R
NWMN_1602	proline dipeptidase-like protein	5195.86	8265	2981.29	4381.43	6986.71	2710.14	4594.57	4873.14	2641.86	5711.57	5836.14	2192.14	E
NWMN_1603	alanine dehydrogenase	8084	6746	5779	6860	8383	5098	11086	6945	5666	7414	7041	6395	E
NWMN_1604	universal stress protein	12790	16238	18059	12105	12531	10079	18074	13641	12324	14354	14925	14369	T
NWMN_1605	acetate kinase	754.5	1205	649.6	841.5	1175	533.8	1294	752.7	628.3	877.5	730.5	394.1	C
NWMN_1606	hypothetical protein	1888	4773	985.7	2335	4056	991.6	1676	2867	710.4	2054	2306	462.6	L
NWMN_1607	thiol peroxidase	6938	15339	3914	7344	11053	3912	9462	7278	3694	7479	8423	2221	O
NWMN_1608	hypothetical protein	830.25	969.75	515.1	712.45	984.55	773.65	681.55	523.1	584.15	640.3	727.15	562.3	R
NWMN_1609	thiamine biosynthesis protein ThiI	942.3	717.1	415.1	530	875.5	741.7	522.2	480	370.1	636.1	532.9	428.5	H
NWMN_1610	aminotransferase class V	785.171	467.357	234.829	503.114	607.186	415.571	408.571	461.529	231.886	497.286	382.814	254.743	E
NWMN_1611	septation ring formation regulator EzrA	17066	20979	14993	12182	16755	10743	20585	15009	15195	18844	15917	11755	D
NWMN_1612	GAF domain-containing protein	2418.14	3690.43	1219.57	2162	3040.43	1023.71	2195.86	2272.43	1097.43	2499.86	2851	899.071	T
NWMN_1613	30S ribosomal protein S4	1543.71	1414.71	851.786	1517.43	1609.57	943.314	1692.86	1377.71	928.7	2124.71	1609.14	1002.9	J
NWMN_1614	glycerophosphoryl diester phosphodiesterase	1830.43	2954.86	1124.79	1926.66	2891.86	1470.56	1585.14	1804	1183.89	2304.43	2475	1154.34	C
NWMN_1615	osmotic stress-related protein	2397	4137	1679	2221	3282	1470	2347	2528	1964	2601	3057	1376	O
NWMN_1616	aminotransferase class V	13371	18814	8110	7865	16129	7801	6786	12134	7079	8082	13850	4731	E
NWMN_1617	D-3-phosphoglycerate dehydrogenase	3496	4843	3117	1916	4528	2438	2504	2439	2542	669.3	4325	1706	H
NWMN_1618	HAD superfamily hydrolase	4915	7495	4143	2602	5603	3965	5005	5408	5133	5793	6299	3855	R
NWMN_1619	PTS system N-acetylglucosamine-specific IIBC component	1861	2069.43	970.8	1998.29	2072.57	981.814	1981	1610	1024.19	3018.14	2010.43	1012.49	G
NWMN_1620	1-acyl-sn-glycerol-3-phosphate acyltransferase domain-containing protein	2334	2316	563	2538	2321	696.4	2398	1329	652.4	3054	1685	450.2	I
NWMN_1621	serine protease HtrA	5585	10779	2609	6264	8379	1998	4829	5830	2345	5887	6412	1393	O
NWMN_1622	tyrosyl-tRNA synthetase	1129	1721	539.6	896.3	1497	424.4	1141	1141	568.9	1234	1230	430.1	J
NWMN_1623	transglycosylase domain-containing protein	1130.71	1458	359.6	910.9	963.386	227.914	942.086	802.8	374.229	1087.57	702.686	197	M
NWMN_1624	haptoglobin-binding surface anchored protein	274.3	366.2	167.15	149.8	174.6	164.7	161.85	168.1	156.75	360.5	248.6	164.65	M
NWMN_1625	formate--tetrahydrofolate ligase	12692.3	19286.1	7439	12195.9	20261	8797.14	10596.4	13804.7	6864.86	13653	15035.1	5799.57	F
NWMN_1626	acetyl-CoA synthetase	7846	15353	2929	9327	14262	4574.5	4938	8352	2997.5	7374.5	8526.5	2143.5	I
NWMN_1627	acetoin utilization protein	9011	10074	3212	7698	9724	4398	4799	5643	2782	7109	5739	1845
NWMN_1628	acetoin utilization protein AcuC	11378	12286	4471	8294	12279	4578	5885	6810	3814	8399	7158	2914	B
NWMN_1629	catabolite control protein A	17395	20677	8424	17480	16415	7490	17638	15996	9866	23439	21365	7449	K
NWMN_1630	bifunctional 3-deoxy-7-phosphoheptulonate synthase/chorismate mutase	2581	3762	636.7	1640	2192	883.4	2858	1228	1314	83.85	1464	1063	E
NWMN_1631	hypothetical protein	25748	27555	25988.5	11799	17913	23468	43197	21188	23260.5	16853.5	16346	20956
NWMN_1632	hypothetical protein	9742	11542.6	7762.71	5068.43	9759.71	11473.7	12753.4	7368.43	8196.43	6916	7412.29	8554.43	R
NWMN_1633	UDP-N-acetylmuramate--L-alanine ligase	9727	14793	8056	11413	9208	9192	9657	8598	7590	14350	9002	8654	M
NWMN_1634	FtsK/SpoIIIE (DNA translocase stage III)	10307	13784	8805	9773	9071	10557	10437	7737	6405	12113	7096	7769	D
NWMN_1635	hypothetical protein	13116	7824	5843	6103	7695	7895	11511	4932	5119	6149	5019	5253	R
NWMN_1636	hypothetical protein	7318	4674	2097	3436	4452	2096	6500	2707	1748	3713	2936	1377	S
NWMN_1637	thioredoxin-like protein	6403	7103	2864	3641	6187	4291	6899	4096	3669	4306	4190	2343	O
NWMN_1638	glutamyl-aminopeptidase	3175	4633	1698	2190	17.67	1799	2487	2947	1764	2916	2530	1328	G
NWMN_1639	hypothetical protein	1056.25	1848.5	314.7	761.25	1471	634.4	1081.5	703.3	567.6	1000.05	923.4	342.3	S
NWMN_1640	hypothetical protein	1914	2375	828.9	1596	1678	867.3	1702	1462	1044	2404	1961	876.6	R
NWMN_1641	tRNA (guanine-N(7)-)-methyltransferase	9247	10278	4997	5877	8213	4687	7317	6615	4441	11075	8828	3392	R
NWMN_1642	hypothetical protein	12369	12787	6208	8239	11618	4479	9889	8747	5119	13298	10734	3962	M
NWMN_1643	D-alanine aminotransferase	9928	14062	6104	4869	10907	4788	8313	9162	5015	10439	10999	4284	E
NWMN_1644	dipeptidase PepV	27319	47218	8094	18945	31302	8687	18862	22784	10018	28413	34118	7358	E
NWMN_1645	hypothetical protein	26393	15035	17410	15740	13753	19795	34967	15694	17942	21235	12897	19491
NWMN_1646	ribosomal small subunit pseudouridine synthase A	5388	6212	2775	4814	6318	3136	4324	3167	2290	2094	5273	2351	J
NWMN_1647	polysaccharide biosynthesis protein	2734	3485	1405	2468	280.3	1977	2342	1646	1257	3800	2454	998.9	R
NWMN_1648	hypothetical protein	845.9	772.7	292.4	801.5	732.7	447	582.9	648.2	337.6	847.6	560.8	264.9	R
NWMN_1649	hypothetical protein	1487	1106	853.3	786.8	957.6	923.2	1085	747.4	884.3	1437	883.9	838.7
NWMN_1650	rhodanese-like domain-containing protein	3262	5303	2600	3685	5037	2646	2781	3484	2883	5098	5183	2310	P
NWMN_1651	leucyl-tRNA synthetase	1854	2915	981.9	2078	2852	1298	1740	1865	849.4	3214	2358	766.4	J
NWMN_1652	multidrug resistance transporter protein B	520.5	383.7	261.1	335.8	316.7	284	361	292	236.7	506.4	458.4	399.8	G
NWMN_1653	hypothetical protein	1998.67	2502.67	754.4	2159	3354.67	1470.67	1168	1148.4	733.1	607.173	1874.33	644.833	R
NWMN_1654	hypothetical protein	1497	1852	800.6	1389	2770	1420	926	1318	729.5	1494	1449	575.5	Q
NWMN_1655	staphylococcal accessory regulator Rot	22643	30640	20625	25077	35752	24680	31738	24257	20208	25006	26001	16459	K
NWMN_1657	lysophospholipase	2169	3020	537.6	1566	2071	1215	2562	848.2	1373	1952	2287	1126	I
NWMN_1658	proline dehydrogenase	17995.6	25233.9	10851.6	18809.7	16148.3	9031.71	21639.3	13767.9	9899.71	27994.7	18293.3	7958.14	E
NWMN_1659	riboflavin synthase beta subunit	4362	10759	6616	4716	8511.5	7910	7027.5	7062	7132	2248	10198.5	4333.5	H
NWMN_1660	riboflavin biosynthesis protein	20114	55360	26186.9	25194.7	52969	34701.3	24292.3	29780.4	25619.1	8155.86	44880.6	13992.7	H
NWMN_1661	riboflavin synthase subunit alpha	17948.7	51286.9	15895.3	22351.6	47470	24951.6	21596	27289.1	18801.7	4359.04	33114.1	11770.7	H
NWMN_1662	riboflavin biosynthesis protein RibD	23700.7	59606.9	18273.9	29249.9	57141.1	31334.1	24839.6	19051.1	21052.4	5946.86	45608.7	13276.7	H
NWMN_1663	hypothetical protein	2143	917.7	817.7	617.4	1013	707.8	2104	778	1206	739.4	673.7	537.7	S
NWMN_1664	arsenate operon regulator	1451	1347	511.4	1562	1669	1115	1024	849.8	601.7	1637	1212	613.9	K
NWMN_1665	Ars family arsenical pump	1700	1877	836.2	1776	2229	1313	1344	1153	822.6	2126	1559	744.9	P
NWMN_1666	arsenate reductase	793	1061	401.8	693.6	1303	870.4	783.9	226.1	487.9	1347	748.9	429.2	T
NWMN_1667	mannosyl-glycoprotein endo-beta-N-acetylglucosamidase	11998.7	19128.7	5663.33	13966	20766.7	7260	8438.33	10234.7	4715	12525.3	10660.7	2907.33	G
NWMN_1668	RNA polymerase sigma-70	283.8	356.7	246.3	119.8	205.1	186.3	212.1	144.5	289.1	97.4	315.1	332.1	K
NWMN_1669	hypothetical protein	640.3	821.5	564.9	305.1	566.6	389.2	526.9	499.1	657.4	612.7	817.8	695.9
NWMN_1670	hypothetical protein	3936	7467	2532	3763	5361	2491	3297	510.1	2511	4144	4953	1602
NWMN_1671	CAAX amino terminal protease	1467	1466	857.6	933.3	933	755.2	946.1	420.3	897.9	186.4	1409	1090	R
NWMN_1672	translaldolase	214	367.4	111.8	173.2	291.7	139.1	258	248.8	121	212.2	189.7	51.38	G
NWMN_1673	hypothetical protein	233.5	329.9	66.5	178.6	263.6	76.23	209.2	164.1	71.49	187.9	170.7	43.08
NWMN_1674	CrcB-like protein	442.34	616.56	130.52	407.96	390.46	93.694	325.1	296.48	125.52	348.9	319.96	92.234	D
NWMN_1675	CrcB-like protein	181.3	271	96.55	157.4	220	66.29	171.2	325.2	104.4	204.3	179.1	65.19	D
NWMN_1678	oxidoreductase	5556.86	6422.14	3984.14	4988.86	6048.29	4861.71	4565	4133.43	3521.43	6377.71	5955.57	3510.43	R
NWMN_1679	hypothetical protein	2309.7	3213.43	1338.96	1964.8	2310.43	1205.76	2583.57	1619.54	1244.57	2259.96	2267.71	859.114
NWMN_1680	S-adenosylmethionine synthetase	1411	1258	446.3	857.2	1224	527.3	1092	1044	437.1	1247	1041	342.7	H
NWMN_1681	phosphoenolpyruvate carboxykinase	22693	22508	8225	28469	27944	15697	22425	19003	8050	23494	16724	8258	C
NWMN_1683	Dipeptidyl aminopeptidases/acylaminoacyl-peptidases DAP2	580.5	720.1	185.1	354.1	579.8	140.3	407	419.9	177.7	435.8	504.6	122	E
NWMN_1684	MutT/Nudix Hydrolase 8	433.9	570	172.4	232.2	364.4	84.81	292.8	284	127.6	315.4	354.6	89.35	L
NWMN_1685	o-succinylbenzoic acid synthetase	1458.5	1904	742.35	883.05	1486	633.3	1061.5	1022.4	609.6	1305.5	1260	508.9	M
NWMN_1686	o-succinylbenzoic acid--coa ligase	1229	2486	313.5	1170	1698	237.9	1002	1020	318.9	1136	1162	148	I
NWMN_1687	lipoprotein	239.8	244.5	159.2	157	470.4	177.2	160.8	189.9	168.2	177	203.8	130.5
NWMN_1688	hypothetical protein	65177	65172	64420	33876	64826	64481	58941	63993	55916	62131	65184	63352
NWMN_1689	hypothetical protein	30530	28860	26559	13018	18157	17113	33265	29405	26766	29963	32272	27650
NWMN_1690	hypothetical protein	458.7	637.7	125.1	225.5	265.3	75.62	385.2	297.5	175.5	651.6	395.4	110.8
NWMN_1691	hypothetical protein	713.6	660	293.5	369.7	381.2	154.1	472.7	403.4	232.3	586.6	451.5	248.9
NWMN_1692	hypothetical protein	568.9	547.2	59.46	288.6	330.7	185.2	487.4	188.7	1160	605	437	185.3
NWMN_1693	hypothetical protein	893.9	1391	655.4	570.2	726.5	357.7	901.3	1001	732.7	1255	1362	463.7	E
NWMN_1694	hypothetical protein	2667	3737	1926	2291	3031	2057	2397	2637	2578	3313	3105	1994
NWMN_1695	transposase	988.1	1322	471.1	901.3	1216	545.7	589.4	902.8	561.6	848.5	817.6	385.6	L
NWMN_1696	hypothetical protein	268.5	140.7	97.32	85.26	120.4	108.5	160	127	94.14	50.82	85.64	54
NWMN_1698	hypothetical protein	2582	974.2	964.2	733.2	1164	1056	1613	707.3	1170	900.4	812.3	630.2
NWMN_1699	type I restriction-modification enzyme S subunit EcoA	4110	4731	1966	2332	3657	2112	2283	2975	1612	3734	3417	1290	V
NWMN_1700	type I restriction-modification system M subunit	112.767	122.067	51.47	62.6533	85.1833	48.5367	64.89	76.18	89.72	79.08	169.733	108.967	V
NWMN_1701	serine protease SplF	5568	3911	2714	398.6	1088	1541	5242	6391	8484	4671	13724	14304	O
NWMN_1702	serine protease SplE	1515	3001	2578	138	271.6	305.3	6816	9529	12258	6527	21367	20145	O
NWMN_1703	serine protease SplD	2167	4195.5	3069.5	202.3	447.25	386.25	6784.5	12166.5	14233	8180.5	25460.5	24517	O
NWMN_1704	serine protease SplC	2894	4874	3956	309	653	548.2	8462	16100	19026	10627	33904	34407	O
NWMN_1705	serine protease SplB	3217	6308	3914	296.2	662.3	496.3	9629	16886	19554	11189	38076	36235	O
NWMN_1706	serine protease SplA	3312	6963	3773	320.7	676.8	65180	10128	19299	18828	13587	38125	29165	O
NWMN_1707	hypothetical protein	118	204.7	118.1	82.75	92.82	106	142.6	229.2	194.8	231.1	265.9	130.2
NWMN_1708	hypothetical protein	802.2	1186	335.4	420.5	441.3	166	1667	1911	1573	84.46	3894	1660
NWMN_1709	lantibiotic ABC transporter protein	33391	25821	9965	19244	17610	37525	24766	573.4	17118	5787	10189	20135
NWMN_1710	lantibiotic ABC transporter protein	29701	23279	23550	18202	18472	39953	26623	16051	19397	17858	11384	25381	C
NWMN_1711	ABC transporter	37825	30024	38186	21331	22248	57437	33404	20441	40973	22614	18585	43548	V
NWMN_1712	intracellular serine protease	1501	1641	825.2	797	1352	978.9	787.3	933.5	813.5	1184	1164	656.6	O
NWMN_1713	flavoprotein epiD	2146	2559	1181	1219	2216	1781	962.6	1408	1194	1655	1780	1023	H
NWMN_1714	epidermin biosynthesis protein EpiC authentic point mutation	1191	1497	337.8	689.6	1175	809	559.8	163.6	549.4	918.5	1062	588.7
NWMN_1715	lantibiotic epidermin biosynthesis protein EpiB	828.2	1357	449.8	624.4	1190	547	643.1	797.7	434.1	846.2	839.8	331.1
NWMN_1716	gallidermin superfamily epiA protein	1926	2224	928.3	1091	1680	844.3	1318	1216	701.3	1219	1383	627.7
NWMN_1717	lantibiotic precursor	3817	3446	1633	1384	1962	2328	3755	3464	3875	3659	5917	4664
NWMN_1718	leukotoxin LukD	456.4	942.2	440.2	140.3	245.4	163.6	903.4	1826	1689	1541	4762	2892
NWMN_1719	leukotoxin LukE	757.5	1361	607.1	282.4	362.6	247.2	1209	2449	2040	1949	6096	3748
NWMN_1720	hypothetical protein	1255	915.4	855.9	601.4	768.1	856.8	1105	686.8	1091	994.6	771.8	826.6
NWMN_1721	hypothetical protein	3392	3503	2445	2308	2508	2524	3115	2155	2827	3891	2847	2193
NWMN_1722	hypothetical protein	3189	5926	1499	3147	4131	1613	2643	3322	1669	3620	3893	1116	R
NWMN_1723	protoporphyrinogen oxidase	2605.29	2520.57	1219.57	2100.29	2488.57	1676.71	1790.43	1278.43	1067.71	2092.71	2205.57	1242.86	H
NWMN_1724	ferrochelatase	4349	3395	1921	2639	3239	2728	2639	2506	1444	3687	2617	1476	H
NWMN_1725	uroporphyrinogen decarboxylase	3342	3220	1064	2558	3287	2018	1855	1789	1082	2745	1923	909.1	H
NWMN_1726	RNAIII-activating protein TRAP	48089.5	61090.5	35813	35460	43394	26474	43813.5	40037	35130	51698.5	51868	33001.5	R
NWMN_1727	hypothetical protein	6978	10622	3173	7443	8342	2940	5882	6234	3120	9610	7821	2713	U
NWMN_1728	ABC transporter ATP-binding protein	7340	11040	2524	7220	8617	2602	6095	2757	2691	5407	8298	2056	V
NWMN_1729	Hit- involved in cell-cycle regulation	13751.9	19037.8	7221.33	11405.1	11909.2	7619.56	14189.2	7022.67	8882.11	15128.9	15350.1	7470.89	F
NWMN_1730	hypothetical protein	29410	27564	37942	18114	19841	22120	38673	29752	37518	31307	30045	26859	R
NWMN_1732	hypothetical protein	417.7	515.6	169.7	322.7	358.7	151.7	298.2	215.3	163.9	227.9	204.8	103.3
NWMN_1733	protein export protein PrsA	9745	9533	4033	6175	6927	2004	8395	6495	4298	8327	8518	3650	O
NWMN_1734	3'-5' exoribonuclease YhaM	1381	1663	1058	987	1461	1029	1815	1096	1295	1570	1263	1006	R
NWMN_1735	hypothetical protein	26491	27452	14232	15817	20007	15148	18481	16201	12744	25409	19865	10060	S
NWMN_1736	DNA repair exonuclease	26519	27367	11015	16430	20145	11555	16759	13382	9909	8816	18360	8104	L
NWMN_1737	hypothetical protein	2379	2392	1626	2885	2195	1386	4602	2952	2070	3283	3175	1719	S
NWMN_1738	hypothetical protein	3082	1263	1382	1039	1292	1516	3091	993.5	958.3	1066	1010	1021	S
NWMN_1739	transcriptional regulator	2901	3866	1464	2987	3039	1206	2248	1981	1463	3237	2299	766.5	K
NWMN_1740	DNA-binding response regulator LuxR	1796	2584	769.2	1841	2331	825.2	1406	1451	590.5	2040	1784	421.2	T
NWMN_1741	sensor histidine kinase	2154	3506	974.3	2376	2529	1185	1475	1651	894.9	3239	1972	530	T
NWMN_1742	ribosomal large subunit pseudouridine synthase D	2087	2117	858.8	1954	1771	773.6	2081	1279	884.8	2468	1714	670.5	J
NWMN_1743	fumarate hydratase	2555	4311	1999	2281	3554	1796	3098	2761	1922	3016	2825	1316	C
NWMN_1744	hypothetical protein	364.75	265.25	150.65	182.85	155.5	170.9	270.15	158.45	137.9	334.55	159.45	122.2
NWMN_1745	hypothetical protein	84.67	66.99	34.13	39.87	17.74	45.86	40.54	46.52	35.41	50.63	47.12	21.52
NWMN_1746	hypothetical protein	36245	32225	33106	21219	23034	25337	61901	28812	38178	28400	25901	25254	G
NWMN_1747	SpoU rRNA methylase	3654	3010	1837	2843	3438	2345	3179	1984	1593	3383	2305	1547	J
NWMN_1748	iron-sulfur cluster-binding protein	2981	2714	1465	2801	3370	2522	2245	1873	1353	3227	2282	1321	C
NWMN_1749	amino acid ABC transporter ATP-binding protein	2119	1059	1304	765	939.5	1637	1791	996.8	1548	1097	1062	1122	E
NWMN_1750	ABC transporter permease protein	203.1	204.8	105.1	165.8	222.4	147.2	177.3	128.5	110.2	228.4	161.5	95.63	E
NWMN_1751	phosphotransferase system EIIC domain-containing protein	1390	1167	580.4	1197	1029	763	1525	808.4	511	1502	992.1	477.4	R
NWMN_1753	ferric uptake regulator-like protein	4510	5649	4378	4628	4331	3391	7410	4697	4765	6347	5918	4274	P
NWMN_1754	D-isomer specific 2-hydroxyacid dehydrogenase	6067	9800	3443	6481	7966	3805	5357	5931	4287	9508	9462	4353	H
NWMN_1755	bacterioferritin comigratory protein	9677	16897	3818	9992	12715	4570	8215	10362	5155	12662	15064	4958	O
NWMN_1756	glutamate-1-semialdehyde aminotransferase	1644.14	2283.57	644.614	1554.43	2741.43	895.329	1206.86	1543.71	662.271	1663.14	1746.86	573.714	H
NWMN_1757	hypothetical protein	11972	14104	5667	11928	12761	5472	8335	7805	5032	6156	12303	4142	S
NWMN_1758	ABC transporter ATP-binding/permease protein	152.1	178.2	77.37	128.4	202.2	130.1	189.6	67.49	73.16	271.3	134	58.73	V
NWMN_1759	hypothetical protein	3261	3223	1723	3228	2897	2081	2941	726.5	1725	4326	2643	1685	J
NWMN_1760	A/G-specific adenine glycosylase	1883	1802	879.65	1430	1724.5	1074	1388.5	1102	740.4	1744	1290.5	751.55	L
NWMN_1761	hypothetical protein	3934	6317	4298	3518	5823	5076	3120	4012	4236	3829	4521	3759	R
NWMN_1762	hypothetical protein	902.6	1375	632.9	721.8	1066	545.5	845.6	753.7	520.9	1204	1034	427.7
NWMN_1763	ABC transporter ATP-binding protein	8398.71	9845.57	2719.43	5614.57	7569.43	3131.71	5134	5038.14	2530	7836.71	5861.14	1769.14	G
NWMN_1764	hypothetical protein	7589	9220	2456	5863	7191	2751	4867	4259	2291	6475	5300	1572	L
NWMN_1765	recombination regulator RecX	2674	3087	889	2019	2816	1062	1972	1758	765.4	2424	1784	622.1	R
NWMN_1766	glycosyltransferase	3136	2481	1774	2188	2275	1660	3145	2099	1986	3539	2051	1567	M
NWMN_1767	ThiJ/PfpI	17267.7	15536.3	18455.7	11988	13859	15144.7	32303.3	14698.7	19205.7	14359.7	14205	15331.7	R
NWMN_1778	hypothetical protein	227.7	212.4	124.9	139.2	312.5	285.4	100.9	152	102.7	79.28	105.4	96.45	E
NWMN_1811	phage anti-repressor	1671	1481	638.7	1101	2227	1358	543.5	963.7	536.8	609	727.4	410.8	K
NWMN_1812	phage repressor	8768	13848	6881	6544	8858	6414	8808	8425	7143	12525	9434	6671	K
NWMN_1814	phage family integrase	1703	1108	678.5	730	911	711.5	1127	821.6	498.5	1472	1150	767.3	L
NWMN_1815	hypothetical protein	952.6	1119	507.9	788.6	1006	729	841	612.3	511.8	1144	1038	618	R
NWMN_1816	hypothetical protein	6913	9174	4911	7083	7545	5061	7151	5388	3777	8655	7589	3922	I
NWMN_1817	aminopeptidase PepS	13756	18332	7862	11186	14112	7857	13740	10193	6647	15837	13238	6068	E
NWMN_1818	hypothetical protein	9685	13647	3991	8732	10406	5568	8675	6631	3434	10292	7896	2493	S
NWMN_1819	low molecular weight phosphotyrosine protein phosphatase	57460	40480	37539	34118	35875	47448	64558	31950	31468	39152	30282	31539	T
NWMN_1820	hypothetical protein	7153	7710	8110	6846	8885	6364	18550	8345	8458	7480	6446	5698
NWMN_1821	ribonuclease BN (tRNA maturation)	34611.5	19395.5	20278	13019.5	14035.5	20658	48981.5	12034	16029.5	17047	11019	15398	S
NWMN_1822	DNA-binding response regulator VraR	3161	4471	2276	2173	3261	1823	3298	2667	2405	4069	3668	2726	T
NWMN_1823	histidine kinase	4167	6162	2522	3719	4418	2046	3732	3439	2259	5241	4611	1769	T
NWMN_1824	hypothetical protein	3069	4343	1650	2934	804.8	1338	2935	2504	1479	3819	3294	1088	S
NWMN_1825	ORF-X	3255.5	4046	661.5	2855	3343.5	756.3	1890.5	1330.25	758.2	2338	2330.5	512.35
NWMN_1826	methionine aminopeptidase	3564	5579	1186.93	3412.33	4061	837.367	2634.33	2654.67	1230.33	3379.33	3307	780.967	J
NWMN_1828	hypothetical protein	163.5	206.8	73.43	128.9	176.4	86.29	95.74	125.1	87.14	342	118.8	55.18
NWMN_1829	CobB/CobQ-like glutamine amidotransferase	1422	1504	686.2	1549	6.63	792.5	1513	1030	601	2233	1289	461.8	R
NWMN_1830	UDP-N-acetylmuramyl tripeptide synthetase	3726.88	3223.62	1224.25	3380.62	3017	1772.88	2786.38	2111.38	1290.5	4615.25	2801.25	1280	M
NWMN_1831	ferritin	20933.8	16014.6	24093.6	22954.6	15757.6	14816.2	32995.8	18040.4	20506.6	21106.4	14348.4	14101	P
NWMN_1832	exonuclease	2608	1586	914.2	1448	1529	1243	1987	966.8	906.9	1757	1055	771	L
NWMN_1833	ImpB/MucB/SamB	535.571	793.971	268.411	492.686	671.943	389.1	363.729	438.171	299.051	636.543	502.1	259.851	L
NWMN_1834	hypothetical protein	3437	4204	1521	3981	3454	2121	2159	1797	1295	3880	2421	1088
NWMN_1835	RNA methyltransferase	504.1	505.3	184.5	339.2	397.1	230.5	455.6	292.5	198	551.2	414.8	210.4	J
NWMN_1836	lipid kinase	3697	4098	1236	3205	3279	1110	3455	2567	1205	4861	3295	1035	I
NWMN_1837	aspartyl/glutamyl-tRNA amidotransferase subunit B	2441	3882	2329	2474	4238	1538	3127	3450	2062	3563	4149	1611	J
NWMN_1838	glutamyl-tRNA(Gln) amidotransferase A subunit	7312.86	10134.9	3882.14	5778.86	9487.86	3731.57	6267.43	7482.29	3473	8670.57	8881.86	2987	J
NWMN_1839	aspartyl/glutamyl-tRNA amidotransferase subunit C	5491	9026	2036	4842	6974	1447	4870	5102	2077	6951	6988	1579	J
NWMN_1840	high affinity proline permease	9530	10118	4413	7923	9570	5563	6020	6429	3679	8262	8202	3120	E
NWMN_1841	CamS sex pheromone cAM373	9388	13373	5337	7204	11291	6545	6268	7772	5818	10569	9948	4628	R
NWMN_1842	DNA ligase NAD-dependent	3494.29	4324.57	2018.71	2631.14	4065.43	2526	2055.29	2836.57	2081	3861	4053.43	1868.29	L
NWMN_1843	ATP-dependent DNA helicase PcrA	1792	2156	935.8	1464	2064	1085	1385	1266	792.8	1903	1585	719.4	L
NWMN_1844	geranylgeranylglyceryl phosphate synthase-like protein	6567.57	5634.57	1778	4503.43	5266.86	2143	3567.43	3063.29	1336.66	4810.14	4034.43	1305.17	R
NWMN_1845	hypothetical protein	1581	2959	768.4	1224	2102	891.9	1719	1553	741.1	2283	1871	569.8	S
NWMN_1846	adenylosuccinate lyase	3189	4572	1190	2924	3509	1168	3234	2610	1234	3675	2943	847.1	F
NWMN_1847	staphopain thiol proteinase	3632	13316	4730	920.8	1866	601.2	8094	10610	7683	11249	19481	7700
NWMN_1848	hypothetical protein	1840	5867	2195	582.9	1208	334.6	3686	5193	3318	5169	8273	3489
NWMN_1849	hypothetical protein	1245	1594	1055	852.1	1559	854.2	1348	1096	866.5	1187	1181	661.7	S
NWMN_1850	NAD synthetase	6136	7882	4368	3837	5570	3918	4665	4806	3574	5300	6609	3679	H
NWMN_1851	nicotinate phosphoribosyltransferase	5212	6514	2316	3665	4682	2360	3150	3426	1886	3703	3622	1292	H
NWMN_1852	nitric oxide synthase oxygenase subunit	1685	1467	726.5	1386	1567	733.7	1843	1078	633.9	1820	1208	586.1	P
NWMN_1853	prephenate dehydratase	502.5	602.4	224.1	414.9	448	200.1	516.2	379.8	211.4	513.7	362.7	117.9	E
NWMN_1854	sodium-dependent transporter (huNaDC-1)	13949	12234	1741	9105	10145	5025	12338	6308	3743	8529	8825	3918	P
NWMN_1855	hypothetical protein	14522	4354	5783	3533	4914	6856	11500	4246	6013	4177	3831	4903
NWMN_1856	pyrazinamidase/nicotinamidase	10865	15756	4470	11441	14190	5888	10873	9163	4670	13364	10048	3255	Q
NWMN_1857	manganese-dependent inorganic pyrophosphatase	2658	4487	1685	1709	3530	2646	3403	2290	1724	2928	2339	1348	C
NWMN_1858	aldehyde dehydrogenase	13593	19806	9797	10395	18046	10549	10001	14556	8938	12635	14534	7827	C
NWMN_1859	hypothetical protein	687.2	1057	434.7	479.9	681.4	463.3	801.2	518.4	475.2	834.3	569.7	324	G
NWMN_1860	hypothetical protein	783.8	737	283	538.7	543.9	294.7	788.4	548.3	338.4	857.4	711.3	226.7
NWMN_1862	hypothetical protein	3132	4063	1284	2354	2968	1477	1880	2230	965.6	2733	2385	765.8	R
NWMN_1863	hypothetical protein	5934	6305	2969	4774	7062	3430	6273	4151	3181	6383	5279	2345
NWMN_1864	hypothetical protein	5945	6486	2516	4003	5640	2723	4975	3690	2332	5619	4261	1644	S
NWMN_1865	hypothetical protein	7031	10463	2543	6544	8153	6891	5792	4962	2469	6953	5935	1439
NWMN_1866	hypothetical protein	1765.57	2272.86	1189.43	1039.8	1770.43	1493	2463.71	1437	1455.57	1723.57	1881.57	1037.63
NWMN_1867	ABC transporter ATP-binding protein	4417.43	5925.43	2878.71	3169.43	4197.86	2551.43	7199.43	4089	3343.57	5263.29	4912.43	2299	V
NWMN_1868	hypothetical protein	3575	4009	2179	2167	2981	1640	5871	3058	2859	4196	3423	1832
NWMN_1869	ABC transporter ATP-binding protein	3055	3580	1961	1963	2731	1639	5114	2896	2318	3945	3021	34857	V
NWMN_1870	GntR family regulatory protein	4508	7407	3395	3988	4715	3255	8708	4851	4270	6706	5919	3191	K
NWMN_1871	hypothetical protein	11403	16748.5	7000.5	10878	11995	36559	10513.5	8647.5	6750	12969.5	10584.5	4769	E
NWMN_1872	cell surface protein mapW2	12124	21563	4159	3046	5662	3288	13743	2626	12310	982.7	7639	16974
NWMN_1873	beta-hemolysin	1664.86	3453.71	1616.29	498.571	1016.43	369.029	3199	4307.71	2946.86	4433.86	6494.43	3447.43
NWMN_1874	hypothetical protein	3164	6089	1987	3308	3584	1190	3786	4821	3107	6031	8653	3087
NWMN_1875	hypothetical protein	772.6	1140	568.2	597.4	921.3	424.6	1148	1119	974.6	1189	1440	881.7
NWMN_1876	hypothetical protein	14724	18618	12776	5841	8731	4166	31141	23294	20100	20327	21612	19515
NWMN_1877	chemotaxis-inhibiting protein CHIPS	1827	2175	512.1	657.2	877.5	255.8	4455	1322	1155	6104	4598	1758
NWMN_1879	phage amidase	4579	5810	2483	3568	4372	1859	4343	4599	2599	5552	4989	1701
NWMN_1880	staphylokinase	772.2	861	658.8	578.5	609.3	487.7	1156	754.1	840.5	1085	1184	941.2
NWMN_1881	amidase	61.3686	33.0343	32.6657	30.3971	31.7971	42.8071	32.66	32.8486	31.5957	28.4657	35.2243	32.9586
NWMN_1882	phage phi LC3 family holin	49.72	39.41	38.46	38.14	110.3	87.64	78.77	37.77	35.87	31.05	41.57	39.93	S
NWMN_1883	enterotoxin type A precursor	1430	1390	617.1	1599	1395	672.3	1699	894.5	502	1500	1113	475.1
NWMN_1884	hypothetical protein	32.7	19.19	23.14	17.46	18.35	18.06	13.91	21.13	14.48	65.06	16.26	16.7
NWMN_1885	phi PVL orf 22-like protein	65.69	56.9	45.97	57.26	50.27	41.22	132.1	38.69	47.83	50.49	50.32	37.65
NWMN_1886	phage minor structural protein	454.467	161.367	197.767	146.4	193.167	256.733	260.767	249.7	213.6	169.867	150.967	194.467
NWMN_1887	phi PVL orfs 18-19-like protein	153.1	85.49	64.95	96.26	93.58	68.61	93.18	62.68	60.81	80.84	69.49	64.55	J
NWMN_1888	hypothetical protein	2581	1492	1312	1527	1695	2660	1871	257.4	1040	54.64	936.2	1785	M
NWMN_1889	hypothetical protein	9.513	6.119	1.545	10.42	15.09	13.74	35.48	12.54	12.25	12	10.22	17.57
NWMN_1890	hypothetical protein	189.5	216.2	125.3	138.4	213.5	181.1	154.1	137.7	94.65	182.2	158.8	80.23
NWMN_1891	hypothetical protein	432.4	495	95	270.7	458	425.1	338.3	29.43	162.5	11.29	75.61	146
NWMN_1892	hypothetical protein	460.7	450.3	244.7	265.5	551.9	461.2	254	277.2	187.1	194.8	228.9	152.9
NWMN_1893	hypothetical protein	241.5	307.9	181.7	175.9	388.8	447.1	103.5	195.9	155.9	127.8	136.3	125.2
NWMN_1894	hypothetical protein	232.2	308.3	184.1	158.7	351.9	399.7	124.5	159.9	166.2	98.85	131.6	121.4
NWMN_1895	hypothetical protein	420.65	438.45	253.2	218.9	494.55	532.25	178.8	290.1	205.7	151.95	198	183.6
NWMN_1896	hypothetical protein	279.7	351.7	213.3	186.3	402.6	428.3	191.1	195.7	176.6	138.3	132	120.8
NWMN_1897	hypothetical protein	240.8	206.3	180.7	134.7	301.8	276.9	103.4	151.5	122.9	132.3	173.7	113	O
NWMN_1898	hypothetical protein	578.2	338.9	274.2	256.8	347.3	338.9	281	219	190.9	258.6	238	172.6
NWMN_1899	hypothetical protein	129.6	105.3	53.75	113.9	105.6	66.28	51.19	87.84	106.9	75.44	96.47	65.83	R
NWMN_1900	hypothetical protein	73.15	52.44	23.2	38.73	49.8	30.07	23.44	33.28	36.13	47.65	39.3	63.13
NWMN_1901	hypothetical protein	55.95	32.56	29.47	34.64	33.23	36.3	138	35.36	28.5	207.4	36.28	31.37	V
NWMN_1902	hypothetical protein	269.6	238.8	178	174.3	219.2	228.8	191.9	208.4	156.8	213.1	134.9	150.9
NWMN_1903	hypothetical protein	516.72	481.48	244.32	304.04	347.96	344.96	321.74	251.42	220.34	397.32	275.88	288.26
NWMN_1904	phage dUTP pyrophosphatase	556	505	278.8	332.6	359.1	351.9	338.1	327.9	264	428.8	300.1	333.8	F
NWMN_1906	phi PVL orf 50-like protein	371.3	276.3	159.9	233.7	235.8	225.5	210	217.5	159.3	275.2	209.8	181.9
NWMN_1907	endodeoxyribonuclease RusA	260.1	240.3	143.9	196.1	187.4	169.5	215.7	157.7	95.4	179.3	149.5	160.2	L
NWMN_1908	hypothetical protein	488.85	349.25	250.25	260.8	274.75	317.3	298.55	219.2	191.5	410.4	211.3	242.9	L
NWMN_1909	phage single-strand DNA-binding protein	4832	2642	1751	3888	4819	3611	2610	3299	2102	4705	4200	3069	L
NWMN_1910	hypothetical protein	306.6	406.5	144.7	182.5	209.6	205.8	180.6	165.4	127	215.2	144.9	164.2	R
NWMN_1911	hypothetical protein	599.5	307.8	191.9	152.4	190.1	186.8	216.2	201.1	148.9	292.5	322.7	265.9	L
NWMN_1912	hypothetical protein	196.6	101.445	76.41	86.22	94.24	106.65	103.53	78.765	75.875	102.875	77.13	78.25
NWMN_1913	hypothetical protein	122.5	177.8	73.34	68.32	79.07	105.1	54.81	56.55	59.81	57.61	72.25	72.19
NWMN_1915	hypothetical protein	104	75.59	48.97	62.1	67.18	58.97	53.29	47.93	45.42	44.73	49.81	46.04
NWMN_1916	hypothetical protein	119.329	116.3	70.4629	73.1443	85.0471	84.1057	96.0271	75.7571	67.8814	106.629	90.8357	58.7471	S
NWMN_1917	hypothetical protein	540.3	574.7	274.94	354.02	433.08	198.22	611.88	391.06	295.42	599.78	513.12	215.36
NWMN_1918	anti repressor	49.16	13.07	21.76	18.81	35.12	32.42	3.734	13.78	16.73	7.207	15.27	19.8	K
NWMN_1919	hypothetical protein	144.7	161.6	92.86	141.6	130.5	99.67	122.5	136.7	108.6	154.3	147.7	93.42
NWMN_1920	helix-turn-helix domain-containing protein	124.7	176.1	71.44	92.46	142.7	86.07	96.79	99.13	67.61	95.91	97.32	9205	K
NWMN_1921	helix-turn-helix domain-containing protein	2725.33	4342.33	1618.67	2068.33	3376	1435.43	2054.67	2628.33	1189.8	2585.67	2539	1264.93	K
NWMN_1922	exonuclease	4220	6431	2183	2579	4126	1209	3705	2615	1974	2204	4067	1568	L
NWMN_1923	hypothetical protein	3929	5259	1873	1957	3126	1107	3283	2417	1642	3325	3234	1366
NWMN_1924	hypothetical protein	4261	6156	1992	2239	3801	1508	3620	3166	1984	3974	3953	1658
NWMN_1925	integrase	387.7	396.7	194	245.7	334.8	230.5	252.2	239.4	144.7	342.4	289.6	163.8	L
NWMN_1926	beta-hemolysin	364.657	335.543	147.1	162.143	230.557	139.571	220.357	145.639	135.729	230.917	221.729	130.7
NWMN_1927	leukocidin/hemolysin toxin subunit F	4377.14	4376	3864.71	1496.14	1935	1513	8322.71	4565.71	6103.43	10860.9	9624.86	8769.57
NWMN_1928	leukocidin/hemolysin toxin subunit S	10462	9490	8017	3495	4563	2530	17068	10318	9648	23867	22338	16427
NWMN_1929	succinyl-diaminopimelate desuccinylase	35495.9	30038.3	28108.2	22082.2	27567.3	37108.8	34512	25425.2	28561	29573.6	23921.3	32678.7	E
NWMN_1930	hypothetical protein	327.4	434	190.4	294.9	331.6	155.4	277.6	249	176.4	348.1	277	130.2	Q
NWMN_1931	iron compound ABC transporter iron compound-binding protein	173.9	344.9	56.7	125.5	150.3	51.05	116.1	114.9	57.21	120	115.4	30.49	P
NWMN_1932	cation transport protein	4102	6709	1556	2804	4686	2098	2260	3639	1836	4002	5899	1988	P
NWMN_1933	acetyltransferase GNAT	7174	5227	3433	4734	4190	4338	7850	3704	3613	6959	4979	5125	K
NWMN_1934	hypothetical protein	3889	2067	1363	2274	1940	2001	3511	1560	1510	3664	1804	2423
NWMN_1935	phage terminase small subunit	458.4	417	228.7	330.9	474.3	405.5	240.8	321.9	272.8	374.8	356.1	221.9	L
NWMN_1936	integrase	70.78	48.96	37.94	42.1	73.3	51.79	26.73	58.36	44.74	55.06	40.74	31.77	L
NWMN_1937	chaperonin GroEL	4154	7133	2851	2610	5544	3115	3331	4214	2612	3833	5513	2744	O
NWMN_1938	co-chaperonin GroES	3604	6079	2364	3236	5594	2685	2859	3423	2351	3017	4303	2152	O
NWMN_1939	hypothetical protein	952.329	1577.24	722.6	794.614	1060.64	459.514	1339.91	1029.76	687.429	1106.83	914.886	362.957	R
NWMN_1940	SdrH protein	3049	3245	1155	3772	3765	1519	2122	2004	866.5	3670	2519	887
NWMN_1941	hypothetical protein	1962	1771	728	1393	1838	906.3	1300	1160	744	1914	1218	524.5	R
NWMN_1942	hydrolase	7319	13686	5721	5195	7437	3328	6056	7866	6011	9105	7641	4307	R
NWMN_1943	accessory gene regulator protein B	65174	65175	65154	65182	65180	65181	65158	65185	65181	65177	65179	65175	O
NWMN_1944	accessory gene regulator protein D	65176	65170	65173	65179	63582	56334	65163	65182	65179	65166	65186	65181
NWMN_1945	accessory gene regulator protein C	27872	28073	22608	21802	12380	14888	39161	23670	25896	46205	35748	37494	T
NWMN_1946	accessory gene regulator protein A	7779	10183	7958	4507	6329	7732	15028	7621	8887	7670	7467	7429	K
NWMN_1947	fructokinase	9741.57	12881.6	5915.57	5461.71	9773.43	5859.29	5773.43	8238.86	5579.43	7977.29	9837.71	5010.43	G
NWMN_1948	sucrose-6-phosphate hydrolase	8600	12066	3004	5131	9506	3668	4307	6717	2698	6713	7506	2204	G
NWMN_1949	sucrose operon repressor	1926	2403	591.3	1438	1666	593.2	1247	1287	515	2016	1685	460.6	K
NWMN_1950	ammonium transporter	88.3	99.63	49.21	54.98	69.6	29.09	67.02	68.92	27.8	77.61	87.15	42.34	P
NWMN_1951	hypothetical protein	112.1	122.4	72.63	109.4	78.66	72.34	131.5	65.01	76.95	94.08	94.84	364.8	O
NWMN_1952	hypothetical protein	147.8	98.27	28.65	107.7	106	70.36	133.6	50.35	50.38	2.732	62.55	51.84	R
NWMN_1953	redox-sensing transcriptional repressor Rex	1103	1474	542.1	977.2	1303	691.7	1211	860.2	571.2	1592	1097	528.1	R
NWMN_1954	ABC transporter ATP-binding protein	3437	4481	1614	2774	3164	1440	2829	2220.5	1275.5	3428	3238.5	1098.2	R
NWMN_1955	MutS domain-containing protein	1181	1667	527.4	909.6	1163	394.8	1078	860.7	483.4	1402	1085	297.6	L
NWMN_1956	O-sialoglycoprotein endopeptidase	2233	2195	1140	1603	2254	1340	1685	1715	1019	1986	2113	957.1	O
NWMN_1957	ribosomal-protein-alanine acetyltransferase	2093	1900	985.4	1319	1747	920.1	1402	1572	805.3	1866	1768	675.7	R
NWMN_1958	hypothetical protein	2567.57	3122.86	1235.71	1971.57	2479.71	1187.43	1871.14	1728.43	1052.46	2668.14	2402.14	867.271	O
NWMN_1959	hypothetical protein	3877	3878.14	1280.29	2590.43	3352.43	1588.71	2506.86	2447.57	1268.86	3332.43	2799.29	934.686	R
NWMN_1960	dihydroxy-acid dehydratase IlvD	751.4	878.8	1130	332.4	603	483.5	453.9	519.7	544.7	436.1	724.9	493.4	E
NWMN_1961	acetolactate synthase large subunit	1155	1217	758	488.7	1087	757.7	451.7	752.6	791.1	628.3	1010	726.4	E
NWMN_1962	ketol-acid reductoisomerase	2772	3143	2305	1026	0.01	2135	1294	1863	2078	1338	2368	1592	E
NWMN_1963	2-isopropylmalate synthase	944.6	814.7	686.9	252.9	616.5	883.3	281.5	437.8	639.1	432.8	710.3	656.5	E
NWMN_1964	3-isopropylmalate dehydrogenase	3374.29	2959.57	2586.71	965.686	2342.14	2725.71	1288.29	1665.14	2084.71	1275.14	2402.57	2028.29	C
NWMN_1965	isopropylmalate isomerase large subunit	1701.43	1633.71	1553.86	610.829	1169.29	1381.14	929.7	950.171	1314.71	857.614	1469.71	1313.57	E
NWMN_1966	isopropylmalate isomerase small subunit	1311.5	1383.5	1196.5	501.35	921.95	1138.5	774.05	771.1	1077.5	772.5	1284	1138	E
NWMN_1967	threonine dehydratase	406.7	470.1	165.9	214.1	299.5	310	263.9	13.33	333.4	151.1	317.1	235	E
NWMN_1968	hypothetical protein	111.9	141.2	66.93	105.4	140	151.3	121	102.6	77.12	144.7	107.5	53.96	S
NWMN_1969	S1 RNA-binding domain-containing protein	3517	3791	1982	3044	3759	3142	3153	2238	1698	4539	2888	1687	K
NWMN_1970	RNA polymerase sigma factor SigB	65178	65177	52160	53769	63225	55754	65149	50390	46440	65183	55385	40249	K
NWMN_1971	serine-protein kinase RsbW	65179	45600	35939	32138	37191	32157	57041	30494	34806	46438	32861	27236	T
NWMN_1972	anti-sigma B factor antagonist	65175	62702	52742	43711	65108	49612	65156	28834	49628	61277	50532	36502	T
NWMN_1973	sigmaB regulation protein RsbU	34248	38532	18897	25796	30053	15988	25809	22382	15454	36290	24367	12851	T
NWMN_1974	PemK family DNA-binding protein	34148	38615	21531	34824	30445	18124	31914	21879	19463	40307	25856	14789	T
NWMN_1975	alanine racemase	6911	7015	4010	3941	5882	4080	4503	4324	3776	7078	5827	3704	M
NWMN_1976	holo-(acyl-carrier-protein) synthase	5532	5564	3357	3586	6037	3973	3582	4075	3511	5309	5037	3019	I
NWMN_1977	hypothetical protein	7686	8510	4293	5462	9097	5986	4816	5489	4036	7756	7112	4100	S
NWMN_1978	hypothetical protein	5823.86	6061.86	3031	4063.57	6661.86	4400.86	3610.29	4044.71	2606	5578	4553.29	2276.86	S
NWMN_1979	hypothetical protein	3516	4342	1652	3006	4152	2080	2520	2265	1513	3671	3141	1508	S
NWMN_1980	potassium-transporting ATPase C subunit	359.143	304.157	168.166	247.271	348.743	293.257	219.034	218.886	202.914	257.1	238.371	191.549	P
NWMN_1981	potassium-translocating P-type ATPase B subunit	747.7	514.7	345.6	438.6	637.1	696.4	422.8	399	380.1	553.1	483.6	444.5	P
NWMN_1982	potassium-transporting ATPase subunit A	527	341.3	258.9	282.3	397	353	388	174	230	96.8	249.3	315.2	P
NWMN_1983	sensor protein KdpD	3144	6429	1846	1713	4494	2090	2169	3783	2347	4841	5972	1831	T
NWMN_1984	DNA-binding response regulator KdpE	4246	5655	2982	1622	4153	2602	3110	3001	3322	3521	5522	2521	T
NWMN_1985	DEAD-box ATP dependent DNA helicase	3433	2505	1121	2522	2342	1598	2356	1694	893.1	2770	1829	851.1	L
NWMN_1986	UDP-N-acetylmuramoylalanyl-D-glutamyl-2,6-diaminopimelate--D-alanyl-D-alanyl ligase	11970	20167	8749	13087	18766	10854	9557	11080	6825	14392	13496	5789	M
NWMN_1987	D-alanyl-alanine synthetase A	9100	12605	3738	7822	12934	6448	6686	7033	3490	9815	7880	2586	M
NWMN_1988	cell division protein	2256	3921	1822	2314	3044	1128	2496	2188	1513	3028	2037	859.3	D
NWMN_1989	hypothetical protein	3770	3765	5904	2923	2825	3757	9713	4876	7611	5490	4456	6874
NWMN_1990	hypothetical protein	2352	1265	1764	1804	1529	2070	1793	1020	1491	1600	1206	1783	P
NWMN_1991	hypothetical protein	2098	1637	2061	1821	1729	3208	1741	1253	2184	1888	1285	2358	S
NWMN_1992	cardiolipin synthetase	4123	4144	2070	3012	3258	2190	3495	2996	1776	4361	3512	1449	I
NWMN_1993	HD domain-containing protein	2804	2937	1656	1872	2242	1554	2328	1798	1307	2866	2441	1152	R
NWMN_1994	membrane protein oxaA	9780	10382	5661	7179	11775	7442	7499	6197	4767	4138	9668	5501	U
NWMN_1995	thiamine-phosphate pyrophosphorylase	3227	3486	1777	1697	4290	1629	1912	2393	1388	2580	3302	1307	H
NWMN_1996	hydroxyethylthiazole kinase	2739	3320	1356	1509	3294	1311	1506	2015	1154	2246	2604	1068	H
NWMN_1997	phosphomethylpyrimidine kinase	4414.5	5633	1497.5	2674	5588	1313.5	2281	1318.87	1143	1627.51	4036	960.5	H
NWMN_1998	transcriptional regulator TenA	6027	8000	1974	4090	7435	1779	3086	4161	1421	4785	5259	1135	K
NWMN_1999	transglycosylase SceD protein	292.1	365.9	131.6	990.4	1898	388.4	106.4	214.6	103.4	195.9	195.3	69.36
NWMN_2000	hypothetical protein	117.4	128.1	76.31	75.8	115.4	99.47	69.2	95.74	91.55	77.64	89.49	50.06
NWMN_2001	bacteriophage L54a single-stranded DNA binding protein	1613	2623	1800	1469	2632	2543	1366	2389	1730	1640	2108	1733	L
NWMN_2002	hypothetical protein	1623	2628	877.4	1801	2329	991.6	1551	1463	878.2	1851	1603	577.5
NWMN_2003	beta-hydroxyacyl-ACP dehydratase	1822	1734	1182	811.1	1718	2519	1907	742.4	933.1	491.2	995	1400	I
NWMN_2004	UDP-N-acetylglucosamine 1-carboxyvinyltransferase	57080	28034	26054	20015	26424	29343	43476	20417	22727	24081	21015	21742	M
NWMN_2005	hypothetical protein	50114.5	21623.5	21463.5	17529	22638	22685	35960.5	16560.5	22504.5	19073	17416	17518	S
NWMN_2006	F0F1 ATP synthase subunit epsilon	9313	9273	7423	6652	10821	15431	11889	7536	8638	9436	10253	10263	C
NWMN_2007	F0F1 ATP synthase subunit beta	33885	23598	17159	21509	27628	24043	23632	20633	18190	26557	27537	21797	C
NWMN_2008	F0F1 ATP synthase subunit gamma	61966	39311	25143	33311	42097	38004	32003	29257	24375	38902	41980	32607	C
NWMN_2009	F0F1 ATP synthase subunit alpha	65176	65172	48268	65183	65182	65175	63176	60916	49030	65171	65182	58394	C
NWMN_2010	F0F1 ATP synthase subunit delta	59076	40669	27722	41452	50977	45500	36591	33569	26298	42893	44716	35660	C
NWMN_2011	F0F1 ATP synthase subunit B	57826	42823	32952	42527	53363	46908	34358	34582	25580	44837	49620	32252	C
NWMN_2012	F0F1 ATP synthase subunit C	61397	50524	27291	47768	56859	46735	39213	34755	26038	44963	54658	38397	C
NWMN_2013	F0F1 ATP synthase subunit A	44772.6	33636.1	20516.4	35805	38658.1	35417.7	27584.7	12118.9	20831.7	16797.6	35614	28322.9	C
NWMN_2014	hypothetical protein	43834.7	28457	20412.3	31564.3	34441.3	33301	26430.3	24530	18872.3	36364.3	31375.3	25790.7
NWMN_2015	UDP-GlcNAc 2-epimerase	42784	33744	25206	26137	33389	31166	28926	25833	21877	31671	30362	26592	M
NWMN_2016	uracil phosphoribosyltransferase	58342	41981	34529	36983	53345	45775	40899	36392	33516	45336	47571	40094	F
NWMN_2017	serine hydroxymethyltransferase	65176	65172	55076	60390	65182	65177	60963	59483	51246	64043	65183	61357	E
NWMN_2018	hypothetical protein	65178	65167	32073	63899	65182	65183	65145	11312	52276	52569	65184	64380	S
NWMN_2019	phosphotyrosine protein phosphatase	847.7	971.3	581.5	686.6	894.95	445.35	774.75	643.55	456.15	1005.75	848.05	336.1	T
NWMN_2020	Sua5/YciO/YrdC/YwlC	1463	1970	576.4	1494	2244	525.2	1112	1388	553.9	1697	1740	477.7	J
NWMN_2021	HemK family modification methylase	6391	6157	2204	5992	6223	3116	4118	4057	2286	8198	5783	2244	J
NWMN_2022	peptide chain release factor 1	5920	5548	1756	5576	5764	2781	3794	3542	1661	7412	4752	1928	J
NWMN_2023	thymidine kinase	4972.86	4468.57	1239.57	4754.86	4774.14	2083.86	3344	2613.57	1309.57	5245.57	3335	1292.71	F
NWMN_2024	50S ribosomal protein L31 type B	671.4	632.7	395.2	702.2	712.4	467.7	808.8	509	472.9	892.6	783.3	497.8	J
NWMN_2025	transcription termination factor Rho	3633	3160	2299	2444	2860	1477	2375	1836	1114	3379	3375	1257	K
NWMN_2026	aldehyde dehydrogenase	32637	15703	27557	12494	15215	25468	35046	15213	24944	13477	13409	22924	C
NWMN_2027	hypothetical protein	11135	17384	11135	12227	13615	10183	14515	13306	11112	19143	16870	11194	K
NWMN_2028	UDP-N-acetylglucosamine 1-carboxyvinyltransferase	8146.86	9040.71	3429.86	6909.43	8254.14	5228	5966.43	5148.86	3428.14	7878.57	5814.86	3194	M
NWMN_2029	fructose-bisphosphate aldolase	54925	58041	43941	39646	41594	39522	55490	42724	45824	59990	44099	45262	G
NWMN_2030	hypothetical protein	2038	2665	709.9	2049	2048	642.6	2252	1471	811.4	2220	1499	503.4
NWMN_2031	CTP synthetase	1477.77	959.614	494.257	1292.43	1293.71	903.529	1350	722.371	434.514	1991.14	1182.04	702.829	F
NWMN_2032	DNA-directed RNA polymerase subunit beta	3407	2982	1043	3380	2979	1144	3786	1957	1170	3732	2594	1282	K
NWMN_2033	acetyltransferase GNAT	1186.65	1316.05	446.85	990.2	1015.85	453.65	1305	1097.05	672.5	1727	1364.55	787.95	K
NWMN_2034	pantothenate kinase	879.557	912.971	413.343	1054.76	1159.69	675.557	712.343	692.286	387.786	1073.71	773.614	418.343	H
NWMN_2035	hypothetical protein	707	868.3	86.08	764.7	838.3	281.8	838.2	34.77	207.5	431.6	340.8	175.1	G
NWMN_2036	hypothetical protein	3721	4733	2442	2770	3598	2112	2744	2591	1985	3498	3461	1731	E
NWMN_2037	aminobenzoyl-glutamate utilization protein B	3275	3081	1401	2304	2939	1409	2070	2017	1059	2501	2375	936.8	R
NWMN_2038	S-ribosylhomocysteinase	4592	6617	2250	4384	6578	2320	5002	4979	3008	6470	5456	1966	T
NWMN_2039	hypothetical protein	18885	20195	9926	8595	15761	13869	14654	12463	10698	15973	15923	11815	S
NWMN_2040	pyrimidine-nucleoside phosphorylase	28660	26568	14196	18976	19895	18251	19823	16323	14270	23787	23896	16729	F
NWMN_2042	purine nucleoside phosphorylase	8964	12523	3739	11064	10615	3199	11531	7126	3591	10196	9758	2594	F
NWMN_2043	general stress protein 20U	6195	6871	5852	4872	5263	6376	11481	6840	8353	7018	6683	6483	P
NWMN_2044	hypothetical protein	14393	7881	9117	6042	6686	8612	12271	5835	9744	6654	6134	7489	S
NWMN_2045	hypothetical protein	19106	22368	7383	14967	16579	7853	11150	10432	5920	15113	11484	3974	R
NWMN_2046	hypothetical protein	2060	1612	555.3	1494	1262	483	2307	1012	513.9	2092	1245	430.8	C
NWMN_2047	mannose-6-phosphate isomerase class I	6149	3791	1715.1	3883.5	3344.5	1818.05	6312	2484	1839.65	4490	2666	1355.65	G
NWMN_2048	hypothetical protein	55763	27770	18971	27803	22810	38668	57879	165.1	28337	19.52	22489	33192	M
NWMN_2049	zinc and cobalt transport repressor protein	4043.29	5697.29	2795	3504.29	5234.57	3113.71	2984.71	3715.57	2765.29	4634.14	4283	1861	K
NWMN_2050	cation efflux	3316	4937	2201	2714	132.7	2217	2667	3072	2329	4023	3462	1482	P
NWMN_2051	lytic regulatory protein	4721	6865	2303	5476	6625	2426	6187	4896	2495	5074	4904	1770
NWMN_2052	resolvase	4117	5303	1895	2964	3648	1617	3073	2799	1588	4323	3452	1178	L
NWMN_2053	SAP domain-containing protein	3955	5427	1385	2636	2496	1039	3133	2622	1367	3641	2930	736.2
NWMN_2054	haloacid dehalogenase-like hydrolase	3224.29	4587.71	2125.71	2644.14	4547.14	3022.71	3018.14	2583.71	2217.14	3307.14	2796.57	1686.71	R
NWMN_2055	ABC transporter ATP-binding protein	2380.43	2899.71	1195.59	2182	3168.43	2364	1426	1707.71	1060.9	2321	2194.86	1071.63	P
NWMN_2056	D-fructose-6-phosphate amidotransferase	2577	1844.44	1514.28	5831.8	3856.8	3474.2	2222.6	2342.56	1203.44	2369.8	2151.08	1494.24	M
NWMN_2057	PTS system mannitol-specific IIBCcomponent	606.8	517.1	213.9	547.8	628.3	366.3	387	269.9	199.9	469.7	415.2	236.6	G
NWMN_2058	transcriptional antiterminator BglG	6751	2610.5	2602.5	4715	3048	5852.5	6049.5	1762	1717.5	3309	1529.5	2969.5	G
NWMN_2059	PTS system mannitol-specific IIA component	16814	15280	11006	12852	10668	16938	17489	9174	9112	11760	7404	10855	G
NWMN_2060	mannitol-1-phosphate 5-dehydrogenase	15197.2	13728	10603.4	12826.8	11060.6	16091.6	17995.2	10025.8	8700.4	13365.4	6876.6	10803.8	G
NWMN_2061	methicillin resistance determinant FmtB protein	3117	2096.5	916.15	850.9	1290.15	1191	1073.35	1223.55	892.6	1689.5	1895	1228.55
NWMN_2062	phosphoglucosamine mutase	21805.2	27128.4	12863.2	13819.6	20412.4	15826.7	17053.5	14243.5	12001.5	20106.6	19751.7	11453	G
NWMN_2063	hypothetical protein	28127.9	32722.8	16157.9	17261.7	23637.3	17265.7	20984.9	17531.2	13809	26183.6	23863.8	14176.3	S
NWMN_2064	hypothetical protein	18205.7	20943.7	9393	12348.3	14658.7	12432.3	13632.7	12037	9114.67	18049	16506	8608	S
NWMN_2065	arginase	9389.57	17453.9	5356.14	9452.71	12839.9	5662.57	9615.14	9343.29	5858.14	11487.9	10924.9	4113.71	E
NWMN_2067	ATP-binding Mrp/Nbp35	2773.47	3930.82	1347.42	2982.35	3985.72	1930.3	2836.4	2286.85	1107.6	3652.22	2363.7	852.525	D
NWMN_2068	drug resistance transporter EmrB/QacA sub	2166	1866	1533	1486	1774	1731	2550	1648	1598	1781	1398	1516	G
NWMN_2069	hypothetical protein	1359	2073	812.5	1263	1301	576.5	1458	1122	983.8	1777	1789	694.6
NWMN_2070	drug transporter	890	1147	548	617.9	755.1	368.1	980.6	721.6	581	982.1	867	446.9	G
NWMN_2071	hemolysin III	4850	6608	2933	4960	4612	2969	5236	3677	3247	7623	4783	2892	R
NWMN_2072	UDP-N-acetylglucosamine pyrophosphorylase	5489.43	5881.86	2867.71	4608.43	5106	3054.71	5117.29	3327.29	2788.29	6567	3981.57	2426.43	G
NWMN_2073	hypothetical protein	4039	4574	2472	3767	3848	2604	3410	2671	2422	5331	3144	1862	R
NWMN_2074	hypothetical protein	3231	5352	3343	3299	5462	4433	10836	5483	5231	5838	4287	2798	C
NWMN_2075	hypothetical protein	563	764.3	298.7	585.5	906	448	561.4	420.4	320.4	550.9	541.4	228.2	S
NWMN_2076	FecCD iron compound ABC transporter permease	267.6	598.1	208.8	203.6	414.4	217.5	277.2	288.3	210.9	359	397.1	211	P
NWMN_2077	iron compound ABC transporter permease protein	247.543	632.686	179.286	226.071	383.386	234.414	204.657	286.457	214.529	360.786	388.629	177.743	P
NWMN_2078	ABC transporter periplasmic binding protein	560.9	1584.29	174.086	379.686	630.929	200.957	758.6	524.671	253.543	511.329	711.8	216.014	P
NWMN_2079	hypothetical protein	1799.14	1311.57	934.143	853.229	230.577	977.671	2302.71	696.086	680.086	1096.41	691.643	842.514	E
NWMN_2080	aerobactin biosynthesis protein	13575	5402	6380	3880	5100	10724	9093	2868	6199	2340	3417	6936	Q
NWMN_2081	hypothetical protein	523.2	794.5	265.5	362.8	536.2	196.2	288.6	365.5	209.6	404.4	593.3	218.5	G
NWMN_2082	aerobactin biosynthesis protein	3264	4021	1169	1996	2904	1137	2055	2087	1232	2640	2513	1053	Q
NWMN_2086	alkaline shock protein 23	1824	2437	2665	1833	1561	2136	4931	3449	3315	3412	3784	4263	S
NWMN_2087	hypothetical protein	65177	65173	65157	65183	61149	64439	65159	65183	65181	65178	65180	65180
NWMN_2088	hypothetical protein	65177	65169.1	65170.9	65177.4	60477.9	58975.4	65162.3	65178.4	65181	65167.7	65183.6	65180.6
NWMN_2089	BCCT family osmoprotectant transporter	23494	16062	16313	16337	14820	26073	32357	14464	12251	18330	10060	17389	M
NWMN_2090	alcohol dehydrogenase zinc-containing	4571	5985	2424	2444	4300	2631	2708	3558	2001	4154	4205	2051	C
NWMN_2091	alcohol dehydrogenase zinc-containing	3330.71	5103.86	2602	3054.71	4667	3005.57	2881.43	3763.43	2301.43	3427	3942.86	2315.29	R
NWMN_2092	hypothetical protein	2812	3913	1554	2336	3392	1719	1961	2104	1536	3009	2283	1292	R
NWMN_2093	6-phospho-beta-galactosidase	266	231.2	143.9	161.8	151.5	227.2	277.3	160.9	141.9	279.9	181.8	158.3	G
NWMN_2094	pts system lactose-specific IIBC component	422.1	285.8	263.9	278.6	272.4	253	325.2	231.8	202.9	859.9	230.5	261.7	G
NWMN_2095	PTS system lactose-specific IIA component	65183	65171	47571	65184	42394	23010	39625	2930	2236	30724	5651	2095	G
NWMN_2096	tagatose 1,6-diphosphate aldolase	233.8	164.2	111.8	142.9	152	183	207.4	129.4	98.82	338.5	140.6	155.3	G
NWMN_2097	tagatose-6-phosphate kinase	249.6	180.2	101.8	128.1	161.8	140.1	172.9	120.1	100.6	135.5	148.5	121.1	G
NWMN_2098	galactose-6-phosphate isomerase subunit LacB	236.6	166.3	107.6	121.2	141.1	136.1	120.2	111.5	110.2	132.2	114.1	141.2	G
NWMN_2099	galactose-6-phosphate isomerase subunit LacA	122.9	96.26	58.76	71.19	77.09	64.02	70.51	60.89	46.08	75.9	94.66	55.23	G
NWMN_2100	lactose phosphotransferase system repressor	2026	2612	937.2	2699	2834	1200	2207	1684	836.5	2668	1863	700.7	K
NWMN_2101	NAD-dependent deacetylase	1648	2288	1035	1446	1786	1187	1448	1188	1013	1859	1406	850.2	K
NWMN_2102	hypothetical protein	461.8	402.3	233.7	297.1	362.9	249.3	402.7	128.7	219.7	195.7	228.7	225.8
NWMN_2103	hypothetical protein	1339	1344	531.5	1081	1328	539.4	808.6	661.7	470.9	1048	884.9	360.5
NWMN_2104	aldo/keto reductase	404.5	545.3	253.6	459.9	700.7	344.7	515.7	294.4	248	275.2	306.3	184.8	R
NWMN_2105	MerR family transcriptional regulator	114.1	147.9	32.71	220.3	323.8	115	54.92	59.99	36.78	51.87	58.19	37.05	K
NWMN_2106	hyaluronate lyase	139.89	100.06	80.402	91.128	110.728	118.536	240.06	135.208	96.604	84.672	76.664	91.944
NWMN_2107	M23/M37 peptidase domain-containing protein	3521	4243	1728	3203	2841	1634	2449	2217	1551	4169	3266	1470	M
NWMN_2108	HAD family hydrolase IIB	3803	4811	1741	3253	3535	1627	2955	2496	1691	4331	3233	1463	R
NWMN_2109	MHC class II analog protein	47181	65170	52213	30553	48565	63973	61902	65181	65178	40706	65184	65179
NWMN_2110	alpha-acetolactate decarboxylase	363.729	188.6	380.657	210.429	94.3514	190.886	164.271	231.714	229.614	259.643	170.414	268.229	Q
NWMN_2111	acetolactate synthase	279.4	224.7	153.3	241.2	276	189.7	274.6	208.2	136	208.9	188	116.2	E
NWMN_2113	hypothetical protein	13975	12707	8401	7682	9940	8169	11976	8873	9512	13639	10860	9424
NWMN_2114	hypothetical protein	11782	12282	7304	7005	9192	7828	10903	8802	8028	13264	10605	8553
NWMN_2115	hypothetical protein	13097	13151	7433	7294	8454	6474	12280	9055	6821	15449	12849	9381	O
NWMN_2116	hypothetical protein	18826	20125.5	10733	11837.5	14295	11835.5	16179	13066.5	12373	21960	17768	13206.5
NWMN_2117	hypothetical protein	17531	20507	9687	11879	13974	10141	14578	11855	12045	19851	18496	12129	R
NWMN_2118	hypothetical protein	1047	1323	418.1	845.5	1039	482.2	674.2	628.4	397.7	1020	892.3	320.4	R
NWMN_2119	30S ribosomal protein S9	6182	3802	2062	4630	4781	2598	5428	3121	2139	5096	4035	2259	J
NWMN_2120	50S ribosomal protein L13	11272	7827.5	3453.5	9176.5	9743.5	5248.5	8078	5272	4056	8641	7116	4093	J
NWMN_2121	tRNA pseudouridine synthase A	5055	4676	2361	3483	6.633	2973	2462	3153	2656	4206	4332	1937	J
NWMN_2122	cobalt transport protein	6000	5567	2858	4057	5988	4131	3087	3595	3091	4831	4581	2644	P
NWMN_2123	cobalt transporter ATP-binding subunit	4934	4805.43	2298.57	4279.71	3241.14	2881.29	3030	3259.14	2352.86	4888.43	4160.14	1853.14	P
NWMN_2124	cobalt transporter ATP-binding subunit	5969	6027	2153	5181	6247	2794	3883	3092	1896	4492	4439	1716	P
NWMN_2125	50S ribosomal protein L17	22916	20355	15082	17639	22204	18124	17419	15615	12769	20298	20617	15481	J
NWMN_2126	DNA-directed RNA polymerase subunit alpha	23716	17560	12160	17101	18939	12965	15156	13573	11165	18882	19223	13851	K
NWMN_2127	30S ribosomal protein S11	23982	18612	11950	16454	20308	15034	15662	13501	11743	16887	18763	14703	J
NWMN_2128	30S ribosomal protein S13	30358	27150	14714	25026	32819	27556	18449	21216	16850	25136	27448	20528	J
NWMN_2130	translation initiation factor IF-1	34890.7	27799.6	18568	26702.9	40779.4	31937.6	20585.7	23909.1	18971	27385.1	28167.9	28921.4	J
NWMN_2131	adenylate kinase	40089	31418	19990	30536	44359	33010	21507	25282	20613	28549	33027	24095	F
NWMN_2132	preprotein translocase subunit SecY	37648.3	26332.7	15059.7	26237.9	33497.4	29404.1	19209.7	20754.6	16446.1	26248.6	30152.3	21213.6	U
NWMN_2133	50S ribosomal protein L15	21826	13109	8460	16456	15407	18610	9649	7594	8548	15315	18271	14783	J
NWMN_2134	50S ribosomal protein L30	25015	16693	11141	19212	25346	23066	12798	14996	12614	21268	22050	18261	J
NWMN_2135	30S ribosomal protein S5	35025	23006	15382	29428	34808	29953	17827	17592	14092	24705	31764	23563	J
NWMN_2136	50S ribosomal protein L18	31513	19935	12948	24307	27573	27146	14080	17129	14021	23987	25151	20666	J
NWMN_2137	50S ribosomal protein L6	25409	11299	9427	18672	22192	19060	10601	8388	9095	1277	18092	13988	J
NWMN_2138	30S ribosomal protein S8	25231.4	15250.1	10035.6	18464.1	24710.1	22614.7	12097	13896.1	11049	20263	21707	16968.7	J
NWMN_2139	30S ribosomal protein S14	31970	16741	13467	26434	31138	30295	16009	17872	14563	25534	26950	22605	J
NWMN_2140	50S ribosomal protein L5	20581	11757	8461	15608	17628	18570	8930	11168	8794	16618	17040	13666	J
NWMN_2141	50S ribosomal protein L24	20231	12717	7522	16482	19977	19082	8208	10683	9040	17299	16955	14971	J
NWMN_2142	50S ribosomal protein L14	28756	16288	10969	23431	26677	27563	11600	17224	12544	22478	24641	18770	J
NWMN_2143	30S ribosomal protein S17	19530	13009	8382	17442	22336	20666	9448	12715	10044	18072	17441	13150	J
NWMN_2144	50S ribosomal protein L29	24761	14152.5	8811	18948.5	22964.5	19575	9944	12464	9072	18553	20031	14919.5	J
NWMN_2145	50S ribosomal protein L16	8691	5134	3475	6819	8747	7564	3696	5480	3719	5067	6788	5540	J
NWMN_2146	30S ribosomal protein S3	27124	17529	8786	23167	26266	20588	11535	906.5	10263	240.8	22389	15727	J
NWMN_2147	50S ribosomal protein L22	35578	23692	13598	32362	34420	29372	16026	18492	14338	27935	30334	24827	J
NWMN_2148	30S ribosomal protein S19	26132	17049	11297	25099	25794	25932	12379	13114	12271	24617	22959	20014	J
NWMN_2149	50S ribosomal protein L2	22656	11451	8310	16124	19913	19328	9266	11038	7441	16008	14981	12779	J
NWMN_2150	50S ribosomal protein L23	16429	9380	6285	13602	13797	16148	7452	9423	6248	13560	12439	10427	J
NWMN_2151	50S ribosomal protein L4	17826	9653	6419	12913	15727	14975	8033	9148	5716	14044	12450	10318	J
NWMN_2152	50S ribosomal protein L3	22825	13952	8725	19273	23796	20947	11337	13365	7631	18908	16488	13506	J
NWMN_2153	30S ribosomal protein S10	19682	12248.5	6314.5	17634	9338.05	15441.5	10207	9501.5	6202.5	15758	15422	9291.5	J
NWMN_2154	hypothetical protein	12295	24765	10816	10911	18803	8729	12037	16486	10967	12300	19057	7855
NWMN_2155	xanthine/uracil permeases	1146.29	1105.14	816.686	1027.89	1198.14	1101.57	1246.71	704.9	770.329	1212.86	969.157	740.2	R
NWMN_2156	DNA topoisomerase III	1782	1849	1021	1554	1746	1234	1568	1159	936.3	1845	1600	1016	L
NWMN_2157	GCN5-related N-acetyltransferase	1379	2947	1081	1705	2107	724.8	1833	1479	948.5	1883	1500	653.6	J
NWMN_2158	sugar transporter	641.7	869.3	359.2	761.5	1022	544.2	529.7	691.2	335	641.6	668.5	256.6	G
NWMN_2159	hypothetical protein	304.9	427.9	178.8	546.6	369.8	258.1	226.6	204.9	188.2	279.3	256.9	158	R
NWMN_2160	hypothetical protein	4728	6971	1443	4627	5595	1337	4162	3839	1824	5416	4817	994.2
NWMN_2161	hypothetical protein	1991	3137	929	2175	2051	692.7	1964	1945	1107	2572	2386	730
NWMN_2162	acriflavin resistance protein	4818	5499.5	3432.75	3031.75	3772.75	3601.25	3232.25	2723.62	2773.25	3618.14	3781.75	2915.75	V
NWMN_2163	FmhB protein	11964.4	9797.71	5019.14	6812.71	10029.6	6986	9215.71	6195.43	3943	7504.14	7134.86	3809.14	V
NWMN_2164	hypothetical protein	4839	7817	2122	4662	7636	3278	3775	3876	1656	4712	4652	1469
NWMN_2165	MarR family regulatory protein	603.5	606.4	197.2	441.8	587.3	357.8	306.8	342.8	233	577.9	478.7	262.1	K
NWMN_2166	hypothetical protein	430.9	361.8	177.3	297.3	354.1	313.1	517.9	280	193.9	620.4	351.7	235.6	G
NWMN_2167	hypothetical protein	1210	1844	470.7	369.8	825.8	650.8	1046	700.3	612.8	1101	1033	573.9	K
NWMN_2168	molybdenum cofactor biosynthesis protein A	12410	12073	9443	10410	10823	14770	12965	7690	6772	11216	10479	9928	H
NWMN_2169	molybdopterin-guanine dinucleotide biosynthesis protein A	9026	6717	4832	4411	5744	8287	6925	4250	4319	6052	4682	5342	H
NWMN_2170	molybdopterin converting factor subunit 1	13960	8360	6754	7443	9005	12091	11491	5849	6499	8797	6719	7584	H
NWMN_2171	molybdopterin converting factor moa	7168.43	6293	3219.57	5141	5956.71	4244.57	4432.71	3591.71	2756.29	6047.29	4498.29	3051.57	H
NWMN_2172	molybdopterin-guanine dinucleotide biosynthesis protein MobB	10562	9285	4129	7738	9091	7510	6335	5458	3914	8027	6656	4308	H
NWMN_2173	molybdopterin biosynthesis protein moeA	7513.67	5676.33	3429.67	4647	6232.33	5549.33	4629.67	3630	3230.33	4751	4499	3509	H
NWMN_2174	molybdenum cofactor biosynthesis protein C	4147	5232	2696	4396	4886	2236	5102	3022	2176	4817	3932	1703	H
NWMN_2175	molybdopterin biosynthesis moaB	3871	3525	1704	3449	4074	2611	2417	2172	1608	3329	2652	1729	H
NWMN_2176	molybdopterin biosynthesis MoeB	4001	3644	1348	3205	3687	2280	2509	1852	1111	3136	2172	1140	H
NWMN_2177	molybdenum transport ATP-binding protein ModC	3022	2206	1246	1986	2130	1997	2483	1416	1175	2280	1786	1361	P
NWMN_2178	molybdenum ABC transporter permease protein	2689.5	2041.5	1361	1713	2185.5	1461.5	2683.5	1362	1111	1914.5	1465.5	1021	P
NWMN_2179	molybdenum ABC transporter periplasmic molybdate-binding protein	8514	9133	3666	6902	8607	3773	7702	4834	3832	7098	6118	2965	P
NWMN_2180	formate dehydrogenase accessory protein	867.1	1488	496.2	1083	1438	652.7	693.2	720.6	411.4	790.4	496.8	262.9	C
[truncated: 416 more rows]
