# Supplementary material for: Staphylococcus aureus Transcriptome Data and Metabolic Modelling Investigate the Interplay of Ser/Thr Kinase PknB, Its Phosphatase Stp, the glmR/yvcK Regulon and the cdaA Operon for Metabolic Adaptation
Source: Microorganisms. 2021 Oct 14;9(10):2148. doi: 10.3390/microorganisms9102148 (PMC8537086; doi:10.3390/microorganisms9102148)
Supplement: Supplementary file 1 [file microorganisms-09-02148-s001.zip › suppl5_TranscriptomeComparison TableS5_S6_S7.xlsx]

## Sheet: WT versus DoubleMutant
Table S5. Gene expression of WT versus Double Mutant
Gene Name	Fold Change	Common	Description	COGs
58058	0.587	accA	acetyl-CoA carboxylase carboxyltransferase subunit alpha (matched PID: 15927277)	I
20753	0.631	accC	acetyl-CoA biotin carboxylase	I
30410	0.455	acpP	acyl carrier protein	I
26359	0.538	agrC	staphylococcal accessory gene regulator protein C	T
20936	0.456	ald	alanine dehydrogenase	E
25763	0.625	bioX	hypothetical protein
26975	0.487	bsaA1	lantibiotic precursor
26953	0.282	chp	chemotaxis-inhibiting protein CHIPS	J
42203	0.62	copA	copper-transporting ATPase copA (matched PID: 15928136)	P
41943	0.442	csbD	sigmaB-controlled gene product (matched PID: 15927205)	S
44097	0.587	ctrA	CTP synthetase (matched PID: 15927701)	F
29609	0.679	drp35	Drp35	G
27928	0.691	fabD	malonyl CoA-acyl carrier protein transacylase	I
33518	1.5	FdhD	formate dehydrogenase accessory protein (matched PID: 15927860)	C
29610	0.709	fmhC	methicillin resistance-related protein FmhC	V
18608	0.548	hla	alpha-hemolysin precursor
33790	0.38	hlb	truncated beta-hemolysin (matched PID: 15927513)
18311	0.584	hlgA	gamma-hemolysin component A
19098	0.355	hlgB	gamma hemolysin, component B
30159	0.373	hlgC	gamma-hemolysin component C
46154	0.455	hmrB	acyl carrier protein (matched PID: 15926815)	I
26402	6.713	lacF	PTS system, lactose-specific IIA component	G
17055	0.633	lip	lipase precursor	R
24381	0.169	lukD	leukocidin LukD precursor
18741	0.197	lukE	leukocidin LukE precursor
21255	0.354	lukF	leukocidin/hemolysin toxin subunit F
16160	0.367	lukS	leukocidin/hemolysin toxin subunit S
19883	0.713	mraW	S-adenosyl-methyltransferase MraW	M
22666	0.682	mutS2	recombination and DNA strand exchange inhibitor protein	L
22273	0.482	NWMN_0041	hypothetical protein
19233	1.898	NWMN_0049	hypothetical protein	P
18357	1.462	NWMN_0070	hypothetical protein
28194	0.569	NWMN_0078	hypothetical protein
31351	0.588	NWMN_0165	hypothetical protein
22089	4.509	NWMN_0306	hypothetical protein
23668	1.444	NWMN_0341	hypothetical protein	R
17182	0.712	NWMN_0346	acetyl-CoA acetyltransferase	I
27989	6.417	NWMN_0353	chromosome partioning ParB family protein	K
17329	0.629	NWMN_0362	hypothetical protein
24932	0.509	NWMN_0374	sodium:dicarboxylate symporter family protein	R
18151	1.456	NWMN_0383	hypothetical protein	T
28173	1.458	NWMN_0387	hypothetical protein	M
1960	0.707	NWMN_0464	50S ribosomal protein L25/general stress protein Ctc	J
17202	0.541	NWMN_0542	hypothetical protein
17119	1.407	NWMN_0634	secretory antigen SsaA-like protein	M
7007	0.688	NWMN_0675	response regulator, putative	T
25814	0.71	NWMN_0676	hypothetical protein	S
26986	0.546	NWMN_0677	hypothetical protein
20998	0.666	NWMN_0709	hypothetical protein
5780	1.437	NWMN_0723	peptide chain release factor 2, putative	J
19256	0.569	NWMN_0768	hypothetical protein	G
19897	0.682	NWMN_0808	hypothetical protein	S
22994	0.469	NWMN_0851	truncated MHC class II analog protein	R
29099	0.428	NWMN_0908	hypothetical protein	P
29041	0.623	NWMN_0931	hypothetical protein
19386	0.7	NWMN_0945	hypothetical protein	S
27327	0.665	NWMN_0977	hypothetical protein	S
27762	1.462	NWMN_0995	phage anti-repressor protein	K
21954	1.591	NWMN_0998	hypothetical protein
23055	1.659	NWMN_0999	hypothetical protein	L
6922	0.682	NWMN_1056	recombination and DNA strand exchange inhibitor protein	L
9573	0.693	NWMN_1057	thioredoxin	O
18596	0.666	NWMN_1068	hypothetical protein
19476	0.503	NWMN_1070	hypothetical protein
34352	0.548	NWMN_1073	alpha-hemolysin (matched PID: 15926746)
24901	0.709	NWMN_1074	hypothetical protein
35627	0.713	NWMN_1089	S-adenosyl-methyltransferase MraW (matched PID: 57650291)	M
21917	0.669	NWMN_1104	hypothetical protein
21260	64.39	NWMN_1129	hypothetical protein	T
26375	205.7	NWMN_1130	serine/threonine-protein kinase	R
12509	0.704	NWMN_1139	putative glycerol-3-phosphate acyltransferase PlsX	I
12184	0.691	NWMN_1140	malonyl CoA-acyl carrier protein transacylase	I
14666	0.455	NWMN_1142	acyl carrier protein	I
13866	0.709	NWMN_1158	hypothetical protein	V
27146	0.661	NWMN_1195	phosphodiesterase	R
25935	0.479	NWMN_1228	hypothetical protein	E
18337	0.51	NWMN_1235	hypothetical protein
22661	0.65	NWMN_1275	4-oxalocrotonate tautomerase	R
24197	0.392	NWMN_1346	hypothetical protein	G
19152	0.475	NWMN_1347	amino acid permease	E
36680	0.456	NWMN_1349	alanine dehydrogenase (matched PID: 15927020)	E
28887	0.572	NWMN_1505	hypothetical protein	P
24563	0.672	NWMN_1506	hypothetical protein	R
42834	0.585	NWMN_1507	hypothetical protein
27090	0.585	NWMN_1509	hypothetical protein	E
16179	0.519	NWMN_1510	hypothetical protein	E
23170	0.638	NWMN_1548	hypothetical protein	J
3976	0.327	NWMN_1701	serine protease SplF, putative	O
9850	0.131	NWMN_1702	serine protease SplE	O
10763	0.148	NWMN_1703	serine protease SplD	O
5062	0.135	NWMN_1704	serine protease SplC	O
2336	0.141	NWMN_1705	serine protease SplB	O
26930	0.579	NWMN_1707	hypothetical protein
8637	0.169	NWMN_1718	leukotoxin, LukD
2997	0.197	NWMN_1719	leukotoxin, LukE, putative
27618	1.604	NWMN_1732	hypothetical protein
22465	0.655	NWMN_1737	hypothetical protein	S
27168	1.679	NWMN_1811	phage anti-repressor	K
32381	0.419	NWMN_1847	staphopain, cysteine proteinase (matched PID: 15927483)
19690	0.442	NWMN_1848	hypothetical protein
18046	0.38	NWMN_1873	truncated beta-hemolysin
26797	0.506	NWMN_1874	hypothetical protein
27911	0.565	NWMN_1875	hypothetical protein
38862	0.606	NWMN_1876	hypothetical protein
42697	0.282	NWMN_1877	chemotaxis-inhibiting protein CHIPS (matched PID: 15927517)
5812	0.582	NWMN_1880	staphylokinase precursor, putative
31904	0.367	NWMN_1927	Aerolysin/leukocidin family protein (matched PID: 57650694)
41507	0.625	NWMN_1928	hypothetical protein
10615	0.538	NWMN_1945	accessory gene regulator protein C	T
22580	1.424	NWMN_1999	hypothetical protein
12609	0.587	NWMN_2031	CTP synthetase	F
22159	0.558	NWMN_2033	acetyltransferase, GNAT family protein	K
10658	6.713	NWMN_2095	PTS system, lactose-specific IIA component	G
20849	0.703	NWMN_2166	hypothetical protein	G
17774	1.5	NWMN_2180	formate dehydrogenase accessory protein	C
23694	0.641	NWMN_2185	iron compound ABC transporter, iron compound-binding protein	P
39438	0.641	NWMN_2197	iron compound ABC transporter, iron compound-binding protein (matched PID: 57652217)	P
30343	0.71	NWMN_2198	transcriptional regulator AraC family protein	K
22343	0.538	NWMN_2279	PTS system, sucrose-specific IIBC component	G
964	0.619	NWMN_2317	immunoglobulin G-binding protein Sbi, putative
2567	0.584	NWMN_2318	gamma-hemolysin h-gamma-II subunit, putative
14415	0.373	NWMN_2319	leukocidin s subunit precursor, putative
3354	0.355	NWMN_2320	leukocidin f subunit precursor
44631	0.572	NWMN_2321	hypothetical protein
20512	1.417	NWMN_2412	ABC transporter, ATP-binding protein	V
23159	1.467	NWMN_2413	hypothetical protein	R
8191	0.711	NWMN_2430	L-serine dehydratase, iron-sulfur-dependent, beta subunit	E
26459	0.62	NWMN_2457	cation-transporting ATPase E1-E2 family protein	P
22476	0.67	NWMN_2549	hypothetical protein
16194	0.625	NWMN_2550	hypothetical protein
16508	0.647	NWMN_2551	accessory secretory protein Asp1
1311	0.633	NWMN_2569	lipase	R
13865	0.679	NWMN_2586	Drp35	G
38017	0.482	plc	1-phosphatidylinositol phosphodiesterase precurosr (matched PID: 15925799)
28253	0.704	plsX	putative glycerol-3-phosphate acyltransferase PlsX	I
21524	1.437	prfB	peptide chain release factor 2	J
28353	0.587	pyrG	CTP synthetase	F
30910	4.604	pyrH	uridylate kinase	F
17704	0.707	rplY	50S ribosomal protein L25/general stress protein Ctc	J
1521	0.64	rpmE2	50S ribosomal protein L31 type B	J
7257	0.586	rpmH	50S ribosomal protein L34
1193	0.707	rpsD	30S ribosomal protein S4	J
28933	0.692	rpsJ	30S ribosomal protein S10	J
1261	0.631	rpsU	30S ribosomal protein S21	J
22751	0.688	saeR	DNA-binding response regulator SaeR	T
21556	0.582	sak	staphylokinase precursor
25252	0.714	sarY	hypothetical protein	K
16708	0.619	sbi	immunoglobulin G-binding protein Sbi
23118	0.606	scn	staphylococcal complement inhibitor SCIN
38087	0.538	scrA	PTS system, sucrose-specific IIBC component (matched PID: 15927957)	G
39679	0.711	sdaAB	L-serine dehydratase, iron-sulfur-dependent, beta subunit (matched PID: 57651041)	E
23935	0.711	sdhB	L-serine dehydratase, iron-sulfur-dependent, beta subunit	E
7937	0.617	secY	preprotein translocase subunit SecY	U
18080	0.141	splB	serine protease SplB	O
20806	0.135	splC	serine protease SplC	O
26507	0.148	splD	serine protease SplD	O
25594	0.131	splE	serine protease SplE	O
19720	0.327	splF	serine protease SplF	O
47583	0.688	spsB	type-1 signal peptidase 1B (matched PID: 15926554)	U
16637	0.419	sspB	staphopain thiol proteinase
25317	0.693	trxA	thioredoxin	O

## Sheet: WT versus PKNB
Table S6. Gene expression of WT versus PKNB mutation
Gene Name	Fold Change	Common	Description	COGs
30410	0.429	acpP	acyl carrier protein	I
26359	0.701	agrC	staphylococcal accessory gene regulator protein C	T
25763	0.62	bioX	hypothetical protein
26975	0.584	bsaA1	lantibiotic precursor
26953	0.519	chp	chemotaxis-inhibiting protein CHIPS	J
41943	0.319	csbD	sigmaB-controlled gene product (matched PID: 15927205)	S
42341	1.404	fmtB	FmtB protein (matched PID: 15927741)
28254	1.469	glpQ	glycerophosphoryl diester phosphodiesterase	C
18608	0.547	hla	alpha-hemolysin precursor
33790	0.479	hlb	truncated beta-hemolysin (matched PID: 15927513)
19098	0.514	hlgB	gamma hemolysin, component B
30159	0.694	hlgC	gamma-hemolysin component C
46154	0.429	hmrB	acyl carrier protein (matched PID: 15926815)	I
26402	7.135	lacF	PTS system, lactose-specific IIA component	G
40265	0.557	lip	triacylglycerol lipase precursor (matched PID: 15928257)	R
40125	0.316	lukD	leukotoxin, LukD (matched PID: 15927393)
34485	0.364	lukE	leukotoxin LukE (matched PID: 15927394)
27588	0.539	lukF	leukocidin/hemolysin toxin subunit F
16160	0.602	lukS	leukocidin/hemolysin toxin subunit S
58148	0.578	mscL	large-conductance mechanosensitive channel (matched PID: 15926928)	M
26660	0.578	mskL	large conductance mechanosensitive channel protein	M
32935	1.525	narG	respiratory nitrate reductase alpha chain (matched PID: 15927975)	C
19233	1.438	NWMN_0049	hypothetical protein	P
28469	0.679	NWMN_0246	hypothetical protein
37441	0.704	NWMN_0296	hypothetical protein
37833	3.785	NWMN_0306	hypothetical protein
23668	1.424	NWMN_0341	hypothetical protein	R
43733	7.592	NWMN_0353	spoOJ protein (matched PID: 57652620)	K
22531	0.66	NWMN_0365	hypothetical protein	K
40676	0.541	NWMN_0374	sodium:dicarboxylate symporter family protein (matched PID: 57652641)	R
17202	0.571	NWMN_0542	hypothetical protein
42730	0.622	NWMN_0677	hypothetical protein
13311	0.706	NWMN_0752	hypothetical protein
35000	0.611	NWMN_0768	phosphoglycerate mutase family protein (matched PID: 57650143)	G
51385	0.666	NWMN_0808	hypothetical protein
52636	0.691	NWMN_0825	general stress protein 13 (matched PID: 57651646)	J
38738	0.435	NWMN_0851	surface protein, putative (matched PID: 57650173)	R
13355	0.657	NWMN_0908	hypothetical protein	P
60529	0.668	NWMN_0931	hypothetical protein
30266	0.634	NWMN_0977	hypothetical protein	S
27762	1.431	NWMN_0995	phage anti-repressor protein	K
21954	1.423	NWMN_0998	hypothetical protein
23055	1.438	NWMN_0999	hypothetical protein	L
19476	0.603	NWMN_1070	hypothetical protein
34352	0.547	NWMN_1073	alpha-hemolysin (matched PID: 15926746)
3793	0.709	NWMN_1091	penicillin-binding protein 1	M
26375	138.6	NWMN_1130	serine/threonine-protein kinase	R
14666	0.429	NWMN_1142	acyl carrier protein	I
13760	1.632	NWMN_1143	ribonuclease III, putative	K
27146	0.697	NWMN_1195	phosphodiesterase	R
25935	0.552	NWMN_1228	hypothetical protein	E
18337	0.552	NWMN_1235	hypothetical protein
22661	0.601	NWMN_1275	4-oxalocrotonate tautomerase	R
25772	0.631	NWMN_1346	hypothetical protein	G
19152	0.652	NWMN_1347	amino acid permease	E
3976	0.46	NWMN_1701	serine protease SplF, putative	O
9850	0.19	NWMN_1702	serine protease SplE	O
10763	0.225	NWMN_1703	serine protease SplD	O
5062	0.216	NWMN_1704	serine protease SplC	O
2336	0.227	NWMN_1705	serine protease SplB	O
26930	0.593	NWMN_1707	hypothetical protein
8637	0.316	NWMN_1718	leukotoxin, LukD
2997	0.364	NWMN_1719	leukotoxin, LukE, putative
22465	0.536	NWMN_1737	hypothetical protein	S
32381	0.545	NWMN_1847	staphopain, cysteine proteinase (matched PID: 15927483)
19690	0.558	NWMN_1848	hypothetical protein
25493	0.71	NWMN_1867	ABC transporter ATP-binding protein	V
21503	0.657	NWMN_1868	hypothetical protein
24923	0.664	NWMN_1870	GntR family regulatory protein	K
18046	0.479	NWMN_1873	truncated beta-hemolysin
26797	0.68	NWMN_1874	hypothetical protein
27911	0.571	NWMN_1875	hypothetical protein
38862	0.482	NWMN_1876	hypothetical protein
42697	0.519	NWMN_1877	chemotaxis-inhibiting protein CHIPS (matched PID: 15927517)
5812	0.653	NWMN_1880	staphylokinase precursor, putative
43332	0.539	NWMN_1927	leukocidin subunit precursor, putative (matched PID: 57650693)
31904	0.602	NWMN_1928	Aerolysin/leukocidin family protein (matched PID: 57650694)
10615	0.701	NWMN_1945	accessory gene regulator protein C	T
22580	1.406	NWMN_1999	hypothetical protein
22159	0.643	NWMN_2033	acetyltransferase, GNAT family protein	K
10853	1.404	NWMN_2061	hypothetical protein
25129	0.443	NWMN_2074	hypothetical protein	C
10658	7.135	NWMN_2095	PTS system, lactose-specific IIA component	G
21894	1.417	NWMN_2199	secretory antigen precursor SsaA	R
20684	1.827	NWMN_2203	secretory antigen precursor SsaA	R
22343	0.67	NWMN_2279	PTS system, sucrose-specific IIBC component	G
1447	1.525	NWMN_2297	nitrate reductase, alpha subunit	C
14415	0.694	NWMN_2319	leukocidin s subunit precursor, putative
3354	0.514	NWMN_2320	leukocidin f subunit precursor
41507	0.62	NWMN_2321	hypothetical protein
15837	1.4	NWMN_2328	ABC transporter ATP-binding protein	V
20512	1.992	NWMN_2412	ABC transporter, ATP-binding protein	V
30022	1.801	NWMN_2413	hypothetical protein	R
8777	0.557	NWMN_2569	lipase	R
51025	0.709	pbpA	penicillin-binding protein 1 (matched PID: 15926764)	M
62347	0.645	pckA	phosphoenolpyruvate carboxykinase (matched PID: 15927365)	C
12922	1.469	pyrC	dihydroorotase	F
29504	1.632	rnc	ribonuclease III	K
23001	0.653	rpmH	50S ribosomal protein L34
25012	0.691	rpsA	30S ribosomal protein S1	J
1261	0.586	rpsU	30S ribosomal protein S21	J
21556	0.653	sak	staphylokinase precursor
23118	0.482	scn	staphylococcal complement inhibitor SCIN
53831	0.67	scrA	PTS system, sucrose-specific IIBC component (matched PID: 15927957)	G
18080	0.227	splB	serine protease SplB	O
36550	0.216	splC	serine protease SplC (matched PID: 15927385)	O
26507	0.225	splD	serine protease SplD	O
25594	0.19	splE	serine protease SplE	O
19720	0.46	splF	serine protease SplF	O
16637	0.545	sspB	staphopain thiol proteinase
41061	0.599	trxA	thioredoxin (matched PID: 15926729)	O

## Sheet: WT versus STP
Table S7. Gene expression of WT versus STP phosphatase mutant
Gene Name	Fold Change	Common	Function	COGs
20753	2.62	accC	acetyl-CoA biotin carboxylase	I
30410	0.616	acpP	acyl carrier protein	I
26359	1.418	agrC	staphylococcal accessory gene regulator protein C	T
20936	2.248	ald	alanine dehydrogenase	E
35038	0.693	arsB	arsenical pump membrane protein (matched PID: 57652070)	P
16774	0.697	bacA	undecaprenyl pyrophosphate phosphatase	V
25763	1.582	bioX	hypothetical protein
26953	2.074	chp	chemotaxis-inhibiting protein CHIPS	J
26270	5.875	comK	competence transcription factor ComK-like protein	K
44097	0.589	ctrA	CTP synthetase (matched PID: 15927701)	F
25260	1.408	cysG	precorrin-2 dehydrogenase	H
34335	2.496	ddh	D-lactate dehydrogenase (matched PID: 15928103)	C
28848	0.664	drp35	Drp35	G
28472	1.512	fhuA	ferrichrome transport ATP-binding protein fhuA	P
26597	2.346	fmtB	methicillin resistance determinant FmtB protein
15888	0.707	gcaD	UDP-N-acetylglucosamine pyrophosphorylase	M
25392	0.38	glmS	D-fructose-6-phosphate amidotransferase	M
31632	0.707	glmU	UDP-N-acetylglucosamine pyrophosphorylase (matched PID: 57650040)	M
28254	0.475	glpQ	glycerophosphoryl diester phosphodiesterase	C
18608	2.433	hla	alpha-hemolysin precursor
33790	3.232	hlb	truncated beta-hemolysin (matched PID: 15927513)
18311	2.892	hlgA	gamma-hemolysin component A
19098	8.412	hlgB	gamma hemolysin, component B
30159	8.071	hlgC	gamma-hemolysin component C
46154	0.616	hmrB	acyl carrier protein (matched PID: 15926815)	I
25886	1.419	hsdR	type-I restriction-modification system restriction endonuclease subunit	V
22975	0.673	hutU	urocanate hydratase	E
19177	2.251	isdC	iron-regulated cell surface protein	M
30268	2.198	isdE	iron compound ABC transporter	P
20196	1.724	isdF	iron/heme permease	P
17294	1.544	isdG	heme-degrading monooxygenase IsdG	R
17055	1.684	lip	lipase precursor	R
24381	2.791	lukD	leukocidin LukD precursor
18741	2.52	lukE	leukocidin LukE precursor
21255	2.183	lukF	leukocidin/hemolysin toxin subunit F
16160	2.337	lukS	leukocidin/hemolysin toxin subunit S
17752	0.573	lytM	peptidoglycan hydrolase	M
20286	0.668	msrR	peptide methionine sulfoxide reductase regulator	K
20554	0.701	mtlF	PTS system, mannitol-specific IIBC component	G
2723	1.784	murQ	N-acetylmuramic acid-6-phosphate etherase	R
17191	0.471	narG	nitrate reductase, alpha subunit	C
27228	0.372	nirR	nitrite reductase transcriptional regulator NirR	S
13398	0.526	NWMN_0016	adenylosuccinate synthetase	F
6529	3.558	NWMN_0041	1-phosphatidylinositol phosphodiesterase precursor, putative
3489	0.408	NWMN_0049	hypothetical protein	P
5876	2.067	NWMN_0072	hypothetical protein	M
1131	2.033	NWMN_0073	hypothetical protein	M
12450	2.965	NWMN_0078	hypothetical protein	O
8119	1.681	NWMN_0085	phosphonates ABC transporter, permease protein CC0363, putative	P
12491	1.675	NWMN_0086	amino acid ABC transporter, ATP-binding protein, putative	P
11473	1.497	NWMN_0137	hypothetical protein	K
10142	1.419	NWMN_0139	HsdR family type I site-specific deoxyribonuclease	V
4272	0.664	NWMN_0150	M23/M37 peptidase domain-containing protein	M
7951	0.641	NWMN_0175	globin domain-containing protein	C
2008	0.573	NWMN_0210	peptidoglycan hydrolase	M
14148	0.601	NWMN_0228	hypothetical protein	S
7638	0.65	NWMN_0253	PfkB family carbohydrate kinase	G
13657	0.632	NWMN_0254	hypothetical protein	Q
7986	0.538	NWMN_0261	hypothetical protein	S
8285	0.597	NWMN_0268	anti repressor	K
22933	0.42	NWMN_0293	hypothetical protein
29160	0.459	NWMN_0295	hypothetical protein
21697	0.448	NWMN_0296	hypothetical protein
18320	0.392	NWMN_0299	hypothetical protein
6345	1.753	NWMN_0306	phiETA ORF57-like protein
5068	0.675	NWMN_0325	hypothetical protein	G
7924	0.644	NWMN_0341	hypothetical protein	R
3966	0.707	NWMN_0346	acetyl-CoA acetyltransferase, putative	I
12245	1.412	NWMN_0353	ParB family chromosome partioning protein	K
9762	2.143	NWMN_0362	hypothetical protein
9188	2.021	NWMN_0374	hypothetical protein	R
2407	1.497	NWMN_0383	hypothetical protein	T
9645	2.042	NWMN_0384	hypothetical protein	L
5431	0.643	NWMN_0387	hypothetical protein	M
144	0.707	NWMN_0462	UDP-N-acetylglucosamine pyrophosphorylase	M
12753	2.049	NWMN_0524	sdrD protein, putative	M
5403	0.289	NWMN_0542	hypothetical protein
10854	0.557	NWMN_0546	hypothetical protein	S
1867	1.576	NWMN_0563	hypothetical protein
12728	1.512	NWMN_0616	iron compound ABC transporter, ATP-binding protein	P
1375	0.567	NWMN_0634	secretory antigen SsaA-like protein	M
1030	0.697	NWMN_0652	undecaprenyl pyrophosphate phosphatase	V
7007	2.411	NWMN_0675	response regulator, putative	T
10070	2.013	NWMN_0676	hypothetical protein	S
11242	2.345	NWMN_0677	hypothetical protein
3197	1.635	NWMN_0702	hypothetical protein	P
9519	1.623	NWMN_0752	hypothetical protein
10243	1.501	NWMN_0753	hypothetical protein
7736	2.239	NWMN_0760	thermonuclease precursor	L
12510	0.475	NWMN_0830	hypothetical protein	C
14086	0.661	NWMN_0835	Signal peptidase IA, putative	U
12152	0.648	NWMN_0836	Signal peptidase IB, putative	U
7250	0.554	NWMN_0851	truncated MHC class II analog protein	R
10526	5.875	NWMN_0895	hypothetical protein	K
13355	2.33	NWMN_0908	hypothetical protein	P
3479	2.121	NWMN_0921	MarR family transcriptional regulator	K
4406	0.685	NWMN_0933	phosphoribosylaminoimidazole carboxylase, catalytic subunit	F
12018	0.615	NWMN_0995	bacteriophage L54a, antirepressor, putative	K
21954	0.67	NWMN_0998	hypothetical protein
23055	0.699	NWMN_0999	hypothetical protein	L
3433	2.251	NWMN_1042	hypothetical protein	M
14524	2.198	NWMN_1044	hypothetical protein	P
4452	1.724	NWMN_1045	iron compound ABC transporter, permease protein	P
9410	1.886	NWMN_1046	hypothetical protein	S
1550	1.544	NWMN_1047	heme-degrading monooxygenase IsdG	R
2852	1.837	NWMN_1068	hypothetical protein
3732	2.186	NWMN_1070	hypothetical protein
2864	2.433	NWMN_1073	alpha-hemolysin precursor
9157	1.609	NWMN_1074	hypothetical protein
1470	3.38	NWMN_1084	hypothetical protein
3793	1.531	NWMN_1091	penicillin-binding protein 1	M
2900	0.679	NWMN_1116	orotate phosphoribosyltransferase	F
5534	60.14	NWMN_1128	radical SAM protein	R
5516	94.61	NWMN_1129	hypothetical protein	T
14666	0.616	NWMN_1142	acyl carrier protein	I
3777	0.628	NWMN_1214	hypothetical protein	R
13394	0.705	NWMN_1215	hypothetical protein	P
10191	1.717	NWMN_1228	hypothetical protein	E
14520	0.525	NWMN_1256	hypothetical protein	O
4542	0.668	NWMN_1274	transcriptional regulator, putative	K
1104	0.412	NWMN_1299	hypothetical protein	P
43354	0.473	NWMN_1300	thioredoxine reductase (matched PID: 15926969)	P
8453	2.062	NWMN_1346	hypothetical protein	G
3408	2.16	NWMN_1347	hypothetical protein	E
5192	2.248	NWMN_1349	alanine dehydrogenase	E
6192	0.46	NWMN_1397	hypothetical protein
29974	0.428	NWMN_1398	hypothetical protein
13143	2.617	NWMN_1505	hypothetical protein	P
8819	2.578	NWMN_1506	hypothetical protein	R
5009	2.62	NWMN_1507	acetyl-CoA carboxylase, biotin carboxylase, putative	I
11346	2.2	NWMN_1509	hypothetical protein	E
435	2.281	NWMN_1510	hypothetical protein	E
13507	0.369	NWMN_1552	hypothetical protein
20928	0.431	NWMN_1553	hypothetical protein
13654	1.68	NWMN_1584	hypothetical protein
366	1.474	NWMN_1649	hypothetical protein
3214	0.594	NWMN_1653	hypothetical protein	R
1428	0.606	NWMN_1664	arsenate operon regulator	K
3550	0.693	NWMN_1665	Ars family arsenical pump	P
14845	1.527	NWMN_1693	hypothetical protein	E
3976	3.853	NWMN_1701	serine protease SplF, putative	O
9850	8.721	NWMN_1702	serine protease SplE	O
10763	7.737	NWMN_1703	serine protease SplD	O
5062	6.885	NWMN_1704	serine protease SplC	O
2336	8.081	NWMN_1705	serine protease SplB	O
8637	2.791	NWMN_1718	leukotoxin, LukD
2997	2.52	NWMN_1719	leukotoxin, LukE, putative
11515	0.686	NWMN_1748	hypothetical protein	C
27168	0.675	NWMN_1811	phage anti-repressor	K
893	5.233	NWMN_1847	staphopain thiol proteinase
3946	4.021	NWMN_1848	hypothetical protein
2302	3.232	NWMN_1873	hypothetical protein
11206	2.423	NWMN_1876	hypothetical protein
11209	2.074	NWMN_1877	chemotaxis-inhibiting protein CHIPS
5511	2.183	NWMN_1927	hypothetical protein
416	2.337	NWMN_1928	hypothetical protein
10615	1.418	NWMN_1945	accessory gene regulator protein C	T
6836	0.232	NWMN_1999	sceD protein, putative
12609	0.589	NWMN_2031	CTP synthetase	F
9909	0.595	NWMN_2034	pantothenate kinase	H
11249	0.697	NWMN_2055	ABC transporter, ATP-binding protein, putative	P
9648	0.38	NWMN_2056	D-fructose-6-phosphate amidotransferase	M
4810	0.701	NWMN_2057	PTS system, mannitol-specific component, putative	G
10853	2.346	NWMN_2061	hypothetical protein
8984	0.705	NWMN_2075	hypothetical protein	S
6520	0.688	NWMN_2104	hypothetical protein	R
6448	0.352	NWMN_2105	MerR family transcriptional regulator	K
9508	1.999	NWMN_2197	hypothetical protein	K
14599	2.057	NWMN_2198	hypothetical protein	K
21894	0.444	NWMN_2199	secretory antigen precursor SsaA	R
4940	0.5	NWMN_2203	secretory antigen precursor SsaA, putative	R
7231	0.673	NWMN_2232	urocanate hydratase	E
1447	0.471	NWMN_2297	nitrate reductase, alpha subunit	C
11484	0.372	NWMN_2301	hypothetical protein	S
964	2.034	NWMN_2317	immunoglobulin G-binding protein Sbi, putative
2567	2.892	NWMN_2318	gamma-hemolysin h-gamma-II subunit, putative
14415	8.071	NWMN_2319	leukocidin s subunit precursor, putative
3354	8.412	NWMN_2320	leukocidin f subunit precursor
10019	1.582	NWMN_2321	hypothetical protein
93	1.695	NWMN_2328	hypothetical protein	V
6902	0.494	NWMN_2331	glycerate kinase, putative	G
9363	0.528	NWMN_2332	hypothetical protein
11359	0.612	NWMN_2341	epimerase/dehydratase, putative	M
11141	1.887	NWMN_2363	peptide ABC transporter, permease protein, putative	E
4072	1.822	NWMN_2364	peptide ABC transporter, peptide-binding protein, putative	E
5293	2.514	NWMN_2422	D-lactate dehydrogenase	C
6739	0.272	NWMN_2456	hypothetical protein
6112	0.596	NWMN_2491	hypothetical protein	S
9516	1.408	NWMN_2517	precorrin-2 dehydrogenase	H
1694	0.66	NWMN_2523	sensor histidine kinase, putative	T
6732	1.819	NWMN_2549	hypothetical protein
450	2.045	NWMN_2550	hypothetical protein
764	2.085	NWMN_2551	hypothetical protein
1311	1.684	NWMN_2569	lipase	R
13104	0.664	NWMN_2586	Drp35	G
7591	0.691	NWMN_2601	integrase/recombinase	L
19816	1.822	opp1A	oligopeptide permease, peptide-binding protein	E
35560	1.822	opp-1A	oligopeptide transporter substrate binding protein (matched PID: 15928046)	E
26885	1.887	opp1B	oligopeptide transporter putative membrane permease	E
58373	1.887	opp-1B	oligopeptide transporter permease (matched PID: 15928045)	E
19537	1.531	pbpA	penicillin-binding protein 1	M
62347	0.685	pckA	phosphoenolpyruvate carboxykinase (matched PID: 15927365)	C
38017	3.558	plc	1-phosphatidylinositol phosphodiesterase precurosr (matched PID: 15925799)
27610	0.473	pstS	phosphate ABC transporter, phosphate-binding protein PstS	P
29142	0.526	purA	adenylosuccinate synthetase	F
20150	0.685	purE	phosphoribosylaminoimidazole carboxylase catalytic subunit	F
58335	0.714	purK	phosphoribosylaminoimidazole carboxylase ATPase subunit (matched PID: 15926651)	F
18644	0.679	pyrE	orotate phosphoribosyltransferase	F
28353	0.589	pyrG	CTP synthetase	F
6653	0.696	rplS	50S ribosomal protein L19	J
7257	0.665	rpmH	50S ribosomal protein L34
9268	1.41	rpsA	30S ribosomal protein S1	J
28933	0.551	rpsJ	30S ribosomal protein S10	J
13012	0.595	rpsR	30S ribosomal protein S18	J
22751	2.411	saeR	DNA-binding response regulator SaeR	T
59910	1.852	saeS	histidine protein kinase (matched PID: 15926382)	T
30052	1.429	sarV	hypothetical protein	K
25252	1.999	sarY	hypothetical protein	K
16708	2.034	sbi	immunoglobulin G-binding protein Sbi
23118	2.201	scn	staphylococcal complement inhibitor SCIN
28497	2.049	sdrD	Ser-Asp rich fibrinogen/bone sialoprotein-binding protein sdrD	M
7937	2.107	secY	preprotein translocase subunit SecY	U
18080	8.081	splB	serine protease SplB	O
20806	6.885	splC	serine protease SplC	O
26507	7.737	splD	serine protease SplD	O
25594	8.721	splE	serine protease SplE	O
19720	3.853	splF	serine protease SplF	O
29830	0.661	spsA	type-I signal peptidase A component	U
27896	0.648	spsB	signal peptidase IB	U
25154	1.886	srtB	NPQTN-specific sortase B	S
16637	5.233	sspB	staphopain thiol proteinase
25389	2.042	tnp	transposase	L
32518	0.697	uppP	undecaprenyl pyrophosphate phosphatase (matched PID: 15926360)	V
