# Supplementary material for: Staphylococcus aureus Transcriptome Data and Metabolic Modelling Investigate the Interplay of Ser/Thr Kinase PknB, Its Phosphatase Stp, the glmR/yvcK Regulon and the cdaA Operon for Metabolic Adaptation
Source: Microorganisms. 2021 Oct 14;9(10):2148. doi: 10.3390/microorganisms9102148 (PMC8537086; doi:10.3390/microorganisms9102148)
Supplement: Supplementary file 1 [file microorganisms-09-02148-s001.zip › suppl6_ProteinAnnotation_Table_S8_S9_S10_COL_vs_8325_vs_Newman.xlsx]

## Sheet: 8325_vs_Newman
Table S8. Genomic comparison between S. aureus NCTC 8325 and Newman*
Locus_tag	Annotation
SAOUHSC_00253	hypothetical protein
SAOUHSC_00778	hypothetical protein
SAOUHSC_01513	hypothetical protein
SAOUHSC_01514	hypothetical protein
SAOUHSC_01520	SLT orf 488-like protein
SAOUHSC_01522	hypothetical protein
SAOUHSC_01523	SLT orf 527-like protein
SAOUHSC_01524	holin-like protein
SAOUHSC_01525	phage tail tape meausure protein
SAOUHSC_01526	hypothetical protein
SAOUHSC_01527	hypothetical protein
SAOUHSC_01528	bacteriophage L54aIg-like domain-containing protein
SAOUHSC_01529	major tail protein
SAOUHSC_01530	hypothetical protein
SAOUHSC_01533	hypothetical protein
SAOUHSC_01535	hypothetical protein
SAOUHSC_01536	scaffolding protease
SAOUHSC_01537	HK97 family phage portal protein
SAOUHSC_01538	phage terminase large subunit
SAOUHSC_01539	terminase small subunit
SAOUHSC_01541	hypothetical protein
SAOUHSC_01542	SNF2 family protein
SAOUHSC_01543	phi-like protein
SAOUHSC_01544	hypothetical protein
SAOUHSC_01545	hypothetical protein
SAOUHSC_01546	hypothetical protein
SAOUHSC_01547	hypothetical protein
SAOUHSC_01548	hypothetical protein
SAOUHSC_01555	hypothetical protein
SAOUHSC_01557	hypothetical protein
SAOUHSC_01559	hypothetical protein
SAOUHSC_01561	PVL orf 50-like protein
SAOUHSC_01565	hypothetical protein
SAOUHSC_01566	phi APSE P51-like protein
SAOUHSC_01567	hypothetical protein
SAOUHSC_01568	hypothetical protein
SAOUHSC_01571	SLT orf 71-like protein
SAOUHSC_01573	hypothetical protein
SAOUHSC_01579	hypothetical protein
SAOUHSC_01580	phi PVL ORF 30-like protein
SAOUHSC_01841	hypothetical protein
SAOUHSC_02015	hypothetical protein
SAOUHSC_02017	hypothetical protein
SAOUHSC_02018	hypothetical protein
SAOUHSC_02056	hypothetical protein
SAOUHSC_02058	hypothetical protein
SAOUHSC_02062	helix-turn-helix DNA binding protein
SAOUHSC_02064	phi ETA orf 25-like protein
SAOUHSC_02066	hypothetical protein
SAOUHSC_02067	bacteriophage L54a DnaB-like helicase family protein
SAOUHSC_02068	hypothetical protein
SAOUHSC_02069	phi PV83 orf 20-like protein
SAOUHSC_02073	hypothetical protein
SAOUHSC_02078	phi PV83 orf 10-like protein
SAOUHSC_02079	hypothetical protein
SAOUHSC_02081	hypothetical protein
SAOUHSC_02086	PV83 orf 4-like protein
SAOUHSC_02087	hypothetical protein
SAOUHSC_02088	excisionase-like protein
SAOUHSC_02183	hypothetical protein
SAOUHSC_02184	phi PVL orf 14-like protein
SAOUHSC_02185	phi PVL orf 13-like protein
SAOUHSC_02186	phi PVL orf 12-like protein
SAOUHSC_02187	HK97 family phage protein
SAOUHSC_02189	hypothetical protein
SAOUHSC_02190	hypothetical protein
SAOUHSC_02191	HK97 family phage major capsid protein
SAOUHSC_02193	prohead protease
SAOUHSC_02194	HK97 family phage portal protein
SAOUHSC_02195	phi PVL orf 3-like protein
SAOUHSC_02196	phage terminase large subunit
SAOUHSC_02197	phage terminase small subunit
SAOUHSC_02198	hypothetical protein
SAOUHSC_02199	phi PVL orf 62-like protein
SAOUHSC_02204	hypothetical protein
SAOUHSC_02206	hypothetical protein
SAOUHSC_02208	PV83 orf 27-like protein
SAOUHSC_02209	hypothetical protein
SAOUHSC_02213	phi ETA orf 25-like protein
SAOUHSC_02218	hypothetical protein
SAOUHSC_02232	phi PVL orf 33-like protein
SAOUHSC_02233	phi PVL orf 32-like protein
SAOUHSC_02234	repressor-like protein
SAOUHSC_02237	hypothetical protein
SAOUHSC_02238	phi PVL ORF 30-like protein
SAOUHSC_02471	hypothetical protein
SAOUHSC_02701	hypothetical protein
SAOUHSC_02805	hypothetical protein
*strain-specific genes in S. aureus NCTC 8325 are listed in this table, they are absent from Newman strain. They are mostly from bacterial phages.

## Sheet: COL_vs_8325
Table S9. Genomic comparison between S. aureus NCTC 8325 and COL.*
New Locus_tag	Annotation	Old Locus_tag
SACOL_RS00155	DUF3578 domain-containing protein	old_locus_tag:SA0026 SACOL0026
SACOL_RS00160	hypothetical protein	old_locus_tag:SA0027 SACOL0027
SACOL_RS00165	IS6-like element IS257 family transposase	old_locus_tag:SA0028 SACOL0028
SACOL_RS14360	hypothetical protein	old_locus_tag:SA0030 SACOL0030
SACOL_RS00180	MaoC family dehydratase	old_locus_tag:SA0032 SACOL0032
SACOL_RS00185	PBP2a family beta-lactam-resistant peptidoglycan transpeptidase MecA	old_locus_tag:SA0033 SACOL0033
SACOL_RS00190	beta-lactam sensor/signal transducer MecR1	old_locus_tag:SA0034 SACOL0034
SACOL_RS00195	DUF3387 domain-containing protein	old_locus_tag:SA0035 SACOL0035
SACOL_RS00205	DUF1643 domain-containing protein	old_locus_tag:SA0037 SACOL0037
SACOL_RS00210	hypothetical protein	old_locus_tag:SA0038 SACOL0038
SACOL_RS00215	hypothetical protein	old_locus_tag:SA0040 SACOL0040
SACOL_RS00225	recombinase family protein	old_locus_tag:SA0042 SACOL0042
SACOL_RS00230	DUF927 domain-containing protein	old_locus_tag:SA0043 SACOL0043
SACOL_RS00235	single-stranded DNA-binding protein	old_locus_tag:SA0044 SACOL0044
SACOL_RS00240	hypothetical protein	old_locus_tag:SA0045 SACOL0045
SACOL_RS14370	hypothetical protein
SACOL_RS00270	hypothetical protein	old_locus_tag:SA0051 SACOL0051
SACOL_RS01610	toxin MazF	old_locus_tag:SA0319 SACOL0319
SACOL_RS01660	DUF2513 domain-containing protein	old_locus_tag:SA0330 SACOL0330
SACOL_RS01665	hypothetical protein	old_locus_tag:SA0331 SACOL0331
SACOL_RS01670	hypothetical protein	old_locus_tag:SA0332 SACOL0332
SACOL_RS01700	DUF1071 domain-containing protein	old_locus_tag:SA0338 SACOL0338
SACOL_RS01740	DNA N-6-adenine-methyltransferase	old_locus_tag:SA0346 SACOL0346
SACOL_RS01805	hypothetical protein	old_locus_tag:SA0359 SACOL0359
SACOL_RS01810	hypothetical protein	old_locus_tag:SA0360 SACOL0360
SACOL_RS04230	excinuclease ABC subunit UvrB	old_locus_tag:SA0823 SACOL0823
SACOL_RS04550	staphylococcal enterotoxin type K	old_locus_tag:SA0886 SACOL0886
SACOL_RS04560	hypothetical protein	old_locus_tag:SA0888 SACOL0888
SACOL_RS04565	ImmA/IrrE family metallo-endopeptidase	old_locus_tag:SA0889 SACOL0889
SACOL_RS04570	helix-turn-helix transcriptional regulator	old_locus_tag:SA0890 SACOL0890
SACOL_RS04575	helix-turn-helix transcriptional regulator	old_locus_tag:SA0891 SACOL0891
SACOL_RS04585	hypothetical protein	old_locus_tag:SA0893 SACOL0893
SACOL_RS04595	DUF1474 family protein	old_locus_tag:SA0895 SACOL0895
SACOL_RS04600	hypothetical protein	old_locus_tag:SA0896 SACOL0896
SACOL_RS04605	hypothetical protein	old_locus_tag:SA0897 SACOL0897
SACOL_RS04610	hypothetical protein	old_locus_tag:SA0898 SACOL0898
SACOL_RS04615	hypothetical protein	old_locus_tag:SA0899 SACOL0899
SACOL_RS04620	hypothetical protein	old_locus_tag:SA0900 SACOL0900
SACOL_RS04625	hypothetical protein	old_locus_tag:SA0901 SACOL0901
SACOL_RS04630	hypothetical protein	old_locus_tag:SA0902 SACOL0902
SACOL_RS04635	hypothetical protein	old_locus_tag:SA0903 SACOL0903
SACOL_RS04640	spore coat protein	old_locus_tag:SA0904 SACOL0904
SACOL_RS04655	staphylococcal enterotoxin type B	old_locus_tag:SA0907 SACOL0907
SACOL_RS05325	glycosyltransferase	old_locus_tag:SA1043 SACOL1043
SACOL_RS05810	50S ribosomal protein L32	old_locus_tag:SA1137 SACOL1137
SACOL_RS08020	cystatin-like fold lipoprotein	old_locus_tag:SA1574 SACOL1574
SACOL_RS08025	hypothetical protein	old_locus_tag:SA1575 SACOL1575
SACOL_RS08030	CHAP domain-containing protein	old_locus_tag:SA1576 SACOL1576
SACOL_RS08035	membrane protein	old_locus_tag:SA1577 SACOL1577
SACOL_RS08040	cell division protein FtsK	old_locus_tag:SA1578 SACOL1578
SACOL_RS08045	DUF87 domain-containing protein	old_locus_tag:SA1579 SACOL1579
SACOL_RS08050	hypothetical protein	old_locus_tag:SA1580 SACOL1580
SACOL_RS08055	hypothetical protein	old_locus_tag:SA1581 SACOL1581
SACOL_RS08060	conjugal transfer protein	old_locus_tag:SA1582 SACOL1582
SACOL_RS08065	replication initiation factor domain-containing protein	old_locus_tag:SA1583 SACOL1583
SACOL_RS08070	hypothetical protein	old_locus_tag:SA1584 SACOL1584
SACOL_RS08075	DUF961 domain-containing protein	old_locus_tag:SA1585 SACOL1585
SACOL_RS08080	hypothetical protein	old_locus_tag:SA1586 SACOL1586
SACOL_RS13195	FUSC family protein	old_locus_tag:SA2520 SACOL2520
SACOL_RS13605	ferrous iron transporter B	old_locus_tag:SA2599 SACOL2599
*The strain-specific genes in COL are listed in the table with both new locus_tag and old Locus_tag labels, they are absent from the NCTC 8325 strain. Interesting genes have been marked in bold.

## Sheet: 8325_COL
Table S10. Genomic comparison between S. aureus NCTC 8325 and COL.*
Locus_tag	Annotation
SAOUHSC_00026	hypothetical protein
SAOUHSC_00323	hypothetical protein
SAOUHSC_00680	hypothetical protein
SAOUHSC_00735	hypothetical protein
SAOUHSC_00764	hypothetical protein
SAOUHSC_00776	excinuclease ABC subunit B
SAOUHSC_00778	hypothetical protein
SAOUHSC_00779	excinuclease ABC subunit B
SAOUHSC_00812	clumping factor
SAOUHSC_00839	hypothetical protein
SAOUHSC_00896	hypothetical protein
SAOUHSC_00946	hypothetical protein
SAOUHSC_01087	iron compound ABC transporter permease
SAOUHSC_01096	hypothetical protein
SAOUHSC_01139	hypothetical protein
SAOUHSC_01187	hypothetical protein
SAOUHSC_01388	hypothetical protein
SAOUHSC_01422	hypothetical protein
SAOUHSC_01425	hypothetical protein
SAOUHSC_01441	hypothetical protein
SAOUHSC_01513	hypothetical protein
SAOUHSC_01514	hypothetical protein
SAOUHSC_01542	SNF2 family protein
SAOUHSC_01543	phi-like protein
SAOUHSC_01544	hypothetical protein
SAOUHSC_01545	hypothetical protein
SAOUHSC_01546	hypothetical protein
SAOUHSC_01547	hypothetical protein
SAOUHSC_01550	hypothetical protein
SAOUHSC_01559	hypothetical protein
SAOUHSC_01560	hypothetical protein
SAOUHSC_01561	PVL orf 50-like protein
SAOUHSC_01565	hypothetical protein
SAOUHSC_01566	phi APSE P51-like protein
SAOUHSC_01567	hypothetical protein
SAOUHSC_01568	hypothetical protein
SAOUHSC_01571	SLT orf 71-like protein
SAOUHSC_01574	helix-turn-helix domain-containing protein
SAOUHSC_A01514	hypothetical protein
SAOUHSC_01576	exonuclease family protein
SAOUHSC_01577	hypothetical protein
SAOUHSC_01579	hypothetical protein
SAOUHSC_01580	phi PVL ORF 30-like protein
SAOUHSC_01608	hypothetical protein
SAOUHSC_01687	hypothetical protein
SAOUHSC_01815	metal-dependent hydrolase
SAOUHSC_01931	hypothetical protein
SAOUHSC_01937	hypothetical protein
SAOUHSC_02015	hypothetical protein
SAOUHSC_02019	autolysin
SAOUHSC_02020	holin
SAOUHSC_02021	phi ETA orf 63-like protein
SAOUHSC_02022	phage tail fiber protein
SAOUHSC_02028	phiETA ORF57-like protein
SAOUHSC_02030	phi ETA orf 55-like protein
SAOUHSC_02031	hypothetical protein
SAOUHSC_02033	phage tape measure protein
SAOUHSC_02034	hypothetical protein
SAOUHSC_02035	hypothetical protein
SAOUHSC_02036	phage structural protein
SAOUHSC_02037	hypothetical protein
SAOUHSC_02038	HK97 family phage protein
SAOUHSC_02040	hypothetical protein
SAOUHSC_02041	phi Mu50B-like protein
SAOUHSC_02042	phi Mu50B-like protein
SAOUHSC_02043	phage head protein
SAOUHSC_02044	hypothetical protein
SAOUHSC_02046	hypothetical protein
SAOUHSC_02047	phage head morphogenesis protein
SAOUHSC_02048	SPP1 family phage portal protein
SAOUHSC_02049	PBSX family phage terminase large subunit
SAOUHSC_02051	int gene activator RinA
SAOUHSC_02052	hypothetical protein
SAOUHSC_02054	hypothetical protein
SAOUHSC_02056	hypothetical protein
SAOUHSC_02058	hypothetical protein
SAOUHSC_02062	helix-turn-helix DNA binding protein
SAOUHSC_02071	single-strand DNA-binding protein
SAOUHSC_02072	hypothetical protein
SAOUHSC_02073	hypothetical protein
SAOUHSC_02077	hypothetical protein
SAOUHSC_02078	phi PV83 orf 10-like protein
SAOUHSC_02086	PV83 orf 4-like protein
SAOUHSC_02087	hypothetical protein
SAOUHSC_02088	excisionase-like protein
SAOUHSC_02089	phage family integrase
SAOUHSC_02169	chemotaxis-inhibiting protein CHIPS
SAOUHSC_02170	peptidoglycan hydrolase
SAOUHSC_02171	staphylokinase
SAOUHSC_02173	amidase
SAOUHSC_02174	phage phi LC3 family holin
SAOUHSC_02175	hypothetical protein
SAOUHSC_02176	hypothetical protein
SAOUHSC_02178	phi PVL orf 22-like protein
SAOUHSC_02179	hypothetical protein
SAOUHSC_02180	phage minor structural protein
SAOUHSC_02181	phi PVL orfs 18-19-like protein
SAOUHSC_02182	tail length tape measure protein
SAOUHSC_02183	hypothetical protein
SAOUHSC_02184	phi PVL orf 14-like protein
SAOUHSC_02185	phi PVL orf 13-like protein
SAOUHSC_02186	phi PVL orf 12-like protein
SAOUHSC_02187	HK97 family phage protein
SAOUHSC_02188	phage head-tail adaptor
SAOUHSC_02189	hypothetical protein
SAOUHSC_02190	hypothetical protein
SAOUHSC_02191	HK97 family phage major capsid protein
SAOUHSC_02193	prohead protease
SAOUHSC_02194	HK97 family phage portal protein
SAOUHSC_02195	phi PVL orf 3-like protein
SAOUHSC_02196	phage terminase large subunit
SAOUHSC_02197	phage terminase small subunit
SAOUHSC_02198	hypothetical protein
SAOUHSC_02199	phi PVL orf 62-like protein
SAOUHSC_02200	hypothetical protein
SAOUHSC_02204	hypothetical protein
SAOUHSC_02205	hypothetical protein
SAOUHSC_02206	hypothetical protein
SAOUHSC_02208	PV83 orf 27-like protein
SAOUHSC_02215	hypothetical protein
SAOUHSC_02216	phage DnaC-like protein
SAOUHSC_02217	phi ETA orf 22-like protein
SAOUHSC_02218	hypothetical protein
SAOUHSC_02220	phi ETA orf 18-like protein
SAOUHSC_02221	hypothetical protein
SAOUHSC_02225	hypothetical protein
SAOUHSC_02226	hypothetical protein
SAOUHSC_02227	hypothetical protein
SAOUHSC_02232	phi PVL orf 33-like protein
SAOUHSC_02233	phi PVL orf 32-like protein
SAOUHSC_02234	repressor-like protein
SAOUHSC_02237	hypothetical protein
SAOUHSC_02238	phi PVL ORF 30-like protein
SAOUHSC_02239	integrase
SAOUHSC_02244	succinyl-diaminopimelate desuccinylase
SAOUHSC_02332	hypothetical protein
SAOUHSC_02386	hypothetical protein
SAOUHSC_02412	hypothetical protein
SAOUHSC_02471	hypothetical protein
SAOUHSC_02473	hypothetical protein
SAOUHSC_02534	hypothetical protein
SAOUHSC_02701	hypothetical protein
SAOUHSC_02805	hypothetical protein
SAOUHSC_02821	membrane spanning protein
SAOUHSC_02890	hypothetical protein
SAOUHSC_02960	hypothetical protein
SAOUHSC_02963	clumping factor B
SAOUHSC_02990	hypothetical protein
SAOUHSC_03005	intercellular adhesion protein C
SAOUHSC_03040	integrase/recombinase
SAOUHSC_03042	integrase/recombinase core subunit
*The table lists the strain-specific genes present in NCTC 8325 strain which are absent from the COL strain.
