# Supplementary material for: Staphylococcus aureus Transcriptome Data and Metabolic Modelling Investigate the Interplay of Ser/Thr Kinase PknB, Its Phosphatase Stp, the glmR/yvcK Regulon and the cdaA Operon for Metabolic Adaptation
Source: Microorganisms. 2021 Oct 14;9(10):2148. doi: 10.3390/microorganisms9102148 (PMC8537086; doi:10.3390/microorganisms9102148)
Supplement: Supplementary file 1 [file microorganisms-09-02148-s001.zip › suppl8_TableS11_stoi_pathwayreactionsExcel_Format.xlsx]

## Sheet: suppl11_stoi_pathwayreactions
Table S11. Stochiometric matrix and reactions involved in the condensed model of Staphylococcus aureus NewHG – model file.
Enzyme name	reversible	Reaction equation	Annotation
3PGDH	TRUE	3PG + NAD+ = 3PHPyr + H+ + NADH	1.1.1.95 SACOL1773(serA)
6PGL	FALSE	6PGL = 6PGA	3.1.1.31 spontanesously
AcCoAC	FALSE	ATP + AcCoA + HCO3- = ADP + MalonylCoA + P	6.4.1.2 SACOL1571(accC) SACOL1661 SACOL1747(accA) SACOL1748(accD)
AcCoAS	FALSE	ATP + Acetate + CoA = AMP + AcCoA + P	6.2.1.1 SACOL1783(acs) SACOL2624
AcetoinS_EC	FALSE	2 Pyr = Acetoin + 2 CO2	1.2.4.1 SACOL1102(pdhA) SACOL1103(pdhB) 2.2.1.6 SACOL2043(ilvB) SACOL2044 SACOL2199(budB) 4.1.1.5 SACOL2198(budA1) SACOL2617(budA2)
AckA	TRUE	ATP + Acetate = ADP + AcP	2.7.2.1 SACOL1760(ackA)
ACN	TRUE	Cit = ICit	4.2.1.3 SACOL1385(acnA)
AcP	FALSE	AcP = Acetate + P	3.6.1.7 SACOL1439
ACS3	FALSE	ATP + CoA + Hexadecanoate = AMP + HexA_CoA + PP	6.2.1.3 SACOL0214
ADCS	FALSE	Chor + Gln = ADC + Glu	2.6.1.85 SACOL0773(pabA)
ADH	TRUE	Ald + H+ + NADH = EtOH + NAD+	1.1.1.1 SACOL0660(adhP)
ADSL	FALSE	SAICAR = AICAR + Fum	4.3.2.2 SACOL1969(purB)
AIRC	FALSE	AIR + CO2 = CAIR	4.1.1.21 SACOL1073(purE) SACOL1074(purK)
AIRS	FALSE	ATP + FGAM = ADP + AIR + P	6.3.3.1 SACOL1080(purM)
AKGDC_EC	FALSE	CoA + NAD+ + aKG = CO2 + H+ + NADH + SuccCoA	1.2.4.2 SACOL1449(kgd) 2.3.1.61 SACOL1448(sucB) 1.8.1.4 SACOL1105(lpdA)
AlaRacemase	TRUE	Ala = D-ala	5.1.1.1 (SACOL1434) alr2 or (SACOL2060) alr / (NWMN_1310) or (NWMN_1975)
AlaTA	TRUE	NADH + NH3 + Pyr = Ala + NAD+	1.4.1.1 (SACOL1478) (*NWMN_1349) ald
AldDH	TRUE	Ald + NAD+ = Acetate + H+ + NADH	Aldehyde dehydrogenase 1.2.1.3 SACOL0154(aldA1) SACOL1984(aldA2) SACOL2114
ARG	FALSE	Arg = Orn + Urea	3.5.3.1 SACOL2154(rocF)
ArgDeimi	FALSE	Arg = Citrulline + NH3	3.5.3.6 SACOL2657(arcA)
ArgSuccLya	TRUE	ArgSucc = Arg + Fum	4.3.2.1 SACOL0963(argH)
ArgSuccS	FALSE	ATP + Asp + Citrulline = AMP + ArgSucc + PP	6.3.4.5 SACOL0964(argG)
ASN	TRUE	Asp + NH3 = Asn	3.5.1.1 SACOL1519(ansA)
AspK	FALSE	ATP + Asp = ADP + ASPP	2.7.2.4 SACOL1360 SACOL1428(lysC)
AspSemiAldDH	TRUE	AspSemiAld + NADP+ + P = ASPP + H+ + NADPH	1.2.1.11 SACOL1429(asd)
ATC	FALSE	Asp + CarbaP = CarbaAsp + P	2.1.3.2 SACOL1212(pyrB)
ATPS	FALSE	ADP + 4 H_cytosol + P = ATP + 4 H+	ATP synthase (complex V)
BCAA_Ile	FALSE	Ile = BCFA
BCAA_Leu	FALSE	Leu = BCFA
BCAA_Val	FALSE	Val = BCFA
ButandiolS_EC	TRUE	Acetoin + H+ + NADH = Butandiol + NAD+	1.1.1.5 SACOL0111 compatible enzyme
CarbaK	FALSE	ATP + CO2 + NH3 = ADP + CarbaP	2.7.2.2 SACOL1182(arcC1) SACOL2654(arcC2)
ChorM	TRUE	Chor = Prephenate	5.4.99.5 SACOL1698 SACOL1787
ChorS	FALSE	EPSP = Chor + P	4.2.3.5 SACOL1506(aroC)
CitS	FALSE	AcCoA + OAA = Cit + CoA	2.3.3.1 SACOL1742(gltA)
CPS	TRUE	2 ATP + Gln + HCO3- = 2 ADP + CarbaP + Glu + P	6.3.5.5 SACOL1214(carA) SACOL1215(carB)
CysS_EC	FALSE	AcCoA + H2S + Ser = Acetate + CoA + Cys	2.3.1.30 SACOL0575(cysE) 2.5.1.47 SACOL0100 SACOL0502 SACOL0557(cysK)
CytochromeCO	FALSE	4 CytCred + 8 H+ + 2 O = 4 CytCox + 4 H_cytosol	CytochromeC oxidate (complexIV)
D-alaDimer	FALSE	ATP + 2 D-ala = ADP + D-ala-D-ala + P	6.3.2.4 (SACOL2074) ddl /(NWMN_1987)
D-AlaTA	TRUE	D-ala + aKG = D-Glu + Pyr	2.6.1.21 SACOL1800(dat) (*NWMN_1643)
DAHPS	FALSE	E4P + PEP = DAHP + P	2.5.1.54 SACOL1787
DAPDC	FALSE	Diaminopim = CO2 + Lys	4.1.1.20 SACOL0107 SACOL1435(lysA)
DHFR	FALSE	DHF + H+ + NADH = NAD+ + THF	1.5.1.3 SACOL1461(folA)
DHFS	FALSE	ATP + DHP + Glu = ADP + DHF + P	6.3.2.17 SACOL1709(folC)
DHO	TRUE	CarbaAsp = DHO	3.5.2.3 SACOL1213(pyrC)
DHODH	TRUE	DHO + 2 O = H2O2 + Orotate	1.3.3.1 SACOL2606(pyrD)
DHPS	FALSE	DHPTPP + PABA = DHP + PP	2.5.1.15 SACOL0558(folP)
DHQ	TRUE	DHQ = DHShi	4.2.1.10 SACOL0873(aroD)
DHQS	FALSE	DAHP = DHQ + P	4.2.3.4 SACOL1505(aroB)
DiaminopimS_EC	FALSE	AspSemiAld + Glu + H+ + NADH + Pyr + SuccCoA = CoA + Diaminopim + NAD+ + Succ + aKG	4.2.1.52 SACOL1430(dapA) 1.3.1.26 SACOL1431(dapB) 2.3.1.117 SACOL1432(dapD) 2.6.1.17 SACOL0170(rocD1) SACOL0960(rocD) 3.5.1.18 SACOL1801 5.1.1.7 SACOL2479
ENO	TRUE	2PG = PEP	4.2.1.11 SACOL0842(eno)
EPSPS	TRUE	PEP + Shi3P = EPSP + P	2.5.1.19 SACOL1504(aroA)
FA_betaOx	FALSE	7 CoA + HexA_CoA + 7 NAD+ + 7 Q = 8 AcCoA + 7 H+ + 7 NADH + 7 QH2	beta oxidation (7 cycles)
FAS	FALSE	HexA_ACProt = ACProt + Hexadecanoate	Fatty acid biosynthesis 2.3.1.85, 3.1.2.14
FAS_EC	FALSE	ACProt + AcCoA + 14 H+ + 7 MalonylACP + 7 NADH + 7 NADPH = 7 CO2 + 7 CoA + HexA_ACProt + 7 NAD+ + 7 NADP+	Fatty acid biosynthesis FabH FabG FabF FabZ FabI
FBP	FALSE	FBP = Fru6P + P	3.1.3.11 SACOL2527
FBPALD	TRUE	FBP = DHAP + GAP	4.1.2.13 SACOL2117(fbaA) SACOL2622(fdaB)
FGAMS	FALSE	ATP + FGAR + Gln = ADP + FGAM + Glu + P	6.3.5.3 SACOL1076(purS) SACOL1077(purQ) SACOL1078(purL)
FormateDH	FALSE	Formate + NAD+ = CO2 + NADH	1.2.1.2 SACOL2301
FTHFL	FALSE	ATP + Formate + THF = 10FTHF + ADP + P	6.3.4.3 SACOL1782(fhs)
FUM	TRUE	Fum = Mal	4.2.1.2 SACOL1908(fumC)
G6PDH	FALSE	G6P + NADP+ = 6PGL + H+ + NADPH	1.1.1.49 SACOL1549(zwf)
GAPDH	TRUE	GAP + NAD+ + P = BPG + H+ + NADH	1.2.1.12 SACOL1734(gapA)
GAR	FALSE	ATP + Gly + PRA = ADP + GAR + P	6.3.4.13 SACOL1083(purD)
GARTF	FALSE	10FTHF + GAR = FGAR + THF	2.1.2.2 SACOL1081(purN)
GlcK	FALSE	ATP + Glc_X = ADP + G6P	2.7.1.2 SACOL1604(glk)
GlcPTS	FALSE	Glc_X + PEP = G6P + Pyr	Glc PTS family
GlnS	FALSE	ATP + Glu + NH3 = ADP + Gln + P	6.3.1.2 SACOL1329(glnA)
GluDH	TRUE	H+ + NADH + NH3 + aKG = Glu + NAD+	1.4.1.2 SACOL0961(gluD)
GluRacemase	TRUE	Glu = D-Glu	5.1.1.3 (SACOL1161) / (NWMN_1063)
GluS	FALSE	Gln + 2 H+ + NADPH + aKG = 2 Glu + NADP+	1.4.1.13 SACOL0514(gltB) SACOL0515(gltD) SACOL2469
GluSemiAldDH	TRUE	Glu + H+ + NADH = GluSemiAld + NAD+	1.5.1.12 SACOL2569
Glycerol3PDH	TRUE	DHAP + H+ + NADH = Glycerol3P + NAD+	1.1.1.8 SACOL1514(gpsA)
GlycerolK	FALSE	ATP + Glycerol = ADP + Glycerol3P + P	2.7.1.30 SACOL1320(glpK)
GlyCleavageSys	FALSE	Gly + THF = MTHF + NH3	GlyCleavageSystem 2.1.2.10 SACOL1595(gcvT)
GOT	TRUE	Glu + OAA = Asp + aKG	2.6.1.1 SACOL2000 23%identity PFAM: Aminotran_1_2
HisCyc	FALSE	Gln + PRuFAICARP = AICAR + EIGP + Glu	4.1.3.- HisF, HsH
HisMeta_EC	FALSE	His = Formate + Glu + 2 NH3	4.3.1.3 SACOL008(hutH) 4.2.1.49 SACOL2324(hutU) 3.5.2.7 SACOL2323(hitI) 3.5.3.8 SACOL2327(hutG) 3.5.1.49 SACOL2021
HisS_EC	FALSE	EIGP + Glu + 2 NAD+ = 2 H+ + His + 2 NADH + P + aKG	4.2.1.19 SACOL2700(hisB) 2.6.1.9 SACOL0784(hisC) SACOL2701 3.1.3.15 SACOL2700(hisB) 1.1.1.23 SACOL2702(hisD)
HomoSerDH	TRUE	HomoSer + NAD+ = AspSemiAld + H+ + NADH	1.1.1.3 SACOL1362(hom)
HomoSerK	FALSE	ATP + HomoSer = ADP + PHomoSer	2.7.1.39 SACOL1364(thrB)
IAPTA1	FALSE	Glu + PhePyr = Phe + aKG	2.6.1.9 SACOL0784(hisC) SACOL2701
IAPTA2	FALSE	Glu + HPhePyr = Tyr + aKG	2.6.1.9 SACOL0784(hisC) SACOL2701
ICitDH	TRUE	ICit + 2 NADP+ = CO2 + 2 H+ + 2 NADPH + aKG	1.1.1.42 SACOL1741(icdA)
IleMeta_EC	FALSE	AcCoA + Ile + 2 NAD+ + 2 Q + aKG = CO2 + CoA + Glu + 2 H+ + MalonylCoA + 2 NADH + 2 QH2	2.6.1.42 1.2.4.4 1.2.4.4 2.3.1.168 1.8.1.4 1.3.99.3 4.2.1.17 1.1.1.35 2.3.1.16 1.3.99.3 4.2.1.17
IleS_EC	FALSE	Glu + H+ + NADPH + Pyr + Thr = CO2 + Ile + NADP+ + NH3 + aKG	1.2.4.1 SACOL1102(pdhA) SACOL1103(pdhB) 4.3.1.19 SACOL2050(ilvA2) SACOL1477(ilvA1) 2.2.1.6 SACOL2043(ilvB) SACOL2044 SACOL2199(budB) 1.1.1.86 SACOL2045(ilvC) 4.2.1.9 SACOL2042(ilvD) 2.6.1.42 SACOL0600(ilvE)
IMPCyc	FALSE	10FTHF + AICAR = THF + purine	2.1.2.3 SACOL1082(purH)
LacDH	TRUE	Lac + NAD+ = H+ + NADH + Pyr	1.1.1.28 SACOL2535 SACOL2574
LeuS_EC	FALSE	AcCoA + Glu + NAD+ + NADPH + 2 Pyr = 2 CO2 + CoA + Leu + NADH + NADP+ + aKG	2.2.1.6 SACOL2043(ilvB) SACOL2044 SACOL2199(budB) 1.1.1.86 SACOL2045(ilvC) 2.3.3.13 SACOL2046(leuA) 4.2.1.33 SACOL2048(leuC) SACOL2049(leuD) 1.1.1.85 SACOL2047(leuB) 2.6.1.42 SACOL0600(ilvE)
LipidProduct	FALSE	Glycerol3P = Glycerol3P_X
Mae	FALSE	Mal + NADP+ = CO2 + H+ + NADPH + Pyr	NADP-dependent 1.1.1.38 SACOL1749
MCAT	FALSE	ACProt + MalonylCoA = CoA + MalonylACP	2.3.1.39 SACOL1244(fabD)
MethenylTHFCyc	TRUE	10FTHF = 510methenylTHF	3.5.4.9 SACOL1072(folD)
MethyleneTHFDH	TRUE	MTHF + NADP+ = 510methenylTHF + H+ + NADPH	1.5.1.5 SACOL1072(folD)
MetS_EC	FALSE	AcCoA + Cys + HomoSer + MetTHPTGlu = Acetate + CoA + Met + NH3 + Pyr + THPTGlu	2.3.1.31 SACOL0012 2.5.1.48 SACOL0431 SACOL0503 4.4.1.8 SACOL0430 2.1.1.14 SACOL0428(metE)
Mqo	TRUE	Mal + Q = OAA + QH2	1.1.99.16 SACOL2362(mqo1) SACOL2623(mqo2)
NADH_OP	FALSE	3 ADP + H+ + NADH + O + 3 P = 3 ATP + NAD+	NADH oxidative phosphorylation
NADHQOR	FALSE	5 H+ + NADH + Q = 4 H_cytosol + NAD+ + QH2	NADH-coenzymeQ complex1
NADK	FALSE	ATP + NAD+ = ADP + NADP+	2.7.1.23 SACOL1011(ppnK)
OMPDC	FALSE	Orotate5P = CO2 + pyrimidine	4.1.1.23 SACOL1216(pyrF)
OPRT	TRUE	Orotate + PRPP = Orotate5P + PP	2.4.2.10 SACOL1217(pyrE)
OrnCyc	TRUE	Orn = NH3 + Pro	4.3.1.12 SACOL0101
OrnS_EC	FALSE	ATP + 2 Glu + H+ + NADPH = ADP + NADP+ + Orn + P + aKG	2.7.2.8 SACOL0167(argB) 1.2.1.38 SACOL0169(argC) 2.6.1.11 SACOL0170(rocD1) SACOL0960(rocD) 2.3.1.35 SACOL0168(argJ)
OTC	TRUE	CarbaP + Orn = Citrulline + P	2.1.3.3 SACOL1181 SACOL1181(argI)
PEPCK	TRUE	ATP + OAA = ADP + CO2 + PEP	4.1.1.49 SACOL1838(pckA)
Peptidoglycan1_EC	FALSE	AcCoA + Fru6P + Gln + pyrimidine = CoA + Glu + PP + UDP-GlcNAc	2.6.1.16 (NWMN_2056) glmS 5.4.2.10 (NWMN_2062) glmM 2.3.1.157 (NWMN_0462) gcaD 2.7.7.23 (NWMN_0462) gcaD
Peptidoglycan2_EC	FALSE	3 ATP + Ala + D-Glu + Lys + NADPH + PEP + UDP-GlcNAc = 3 ADP + NADP+ + 4 P + UDP-MurNAc-Lala-gDglu-Llys	2.5.1.7 (NWMN_2004) murA or (NWMN_2028) murZ; 1.3.1.98 (NWMN_0707) murB; 6.3.2.8 (NWMN_1633)murC; 6.3.2.9 (NWMN_1093) murD; 6.3.2.7 (NWMN_0888) murE
Peptidoglycan3_EC	FALSE	ATP + D-ala-D-ala + UDP-MurNAc-Lala-gDglu-Llys = ADP + P + UDP-MurNAc-Lala-gDglu-Llys-Dala-Dala	6.3.2.10 (SACOL2073) murF /(NWMN_1986)
Peptidoglycan4_EC	FALSE	UDP-MurNAc-Lala-gDglu-Llys-Dala-Dala + Undecaprenyl-P = Und-PP-MurNAc-Lala-gDglu-Llys-Dala-Dala + pyrimidine	2.7.8.13 (NWMN_1092) mraY
Peptidoglycan5_EC	FALSE	5 ATP + 5 Gly + UDP-GlcNAc + Und-PP-MurNAc-Lala-gDglu-Llys-Dala-Dala = 5 AMP + D-ala + 5 PP + Peptidoglycan + pyrimidine	6.1.1.14 (NWMN_1468) glyS; 2.4.1.227 (NWMN_1330) murG; 2.3.2.16 (NWMN_2163) fmhB; 2.3.2.17 (NWMN_1286) femA; 2.3.2.18 (NWMN_1287) femB; 3.4.16.4 (NWMN_0612) pbp4 (NWMN_1623)sgtA (NWMN_1766)sgtB (NWMN_1361)pbp2 (NWMN_1091)pbpA (NWMN_1455)pbp3
PFK	FALSE	ATP + Fru6P = ADP + FBP	2.7.1.11 SACOL1746(pfkA)
PGADH	FALSE	6PGA + NADP+ = CO2 + H+ + NADPH + Ru5P	1.1.1.44 SACOL1554(gnd)
PGI	TRUE	G6P = Fru6P	5.3.1.9 SACOL0966(pgi)
PGK	TRUE	ADP + BPG = 3PG + ATP	2.7.2.3 SACOL0839(pgk)
PGM	TRUE	3PG = 2PG	5.4.2.1 SACOL0447 SACOL0841(pgm) SACOL2415(gpm)
PRATPPPH	FALSE	PRATP = PP + PRFAICARP	3.6.1.31+3.5.4.19 SACOL2696(hisI)
PRATPS	FALSE	ATP + PRPP = PP + PRATP	2.4.2.17 SACOL2703(hisG)
PrephDH_EC	FALSE	NAD+ + Prephenate = CO2 + HPhePyr + NADH	1.3.1.12 SACOL1401(tyrA)
PrephDHA	FALSE	Prephenate = CO2 + PhePyr	4.2.1.51 SACOL1977(pheA)
PRFAICARPI	FALSE	PRFAICARP = PRuFAICARP	5.3.1.16 SACOL2698(hisA)
ProO	TRUE	GluSemiAld + H+ + NADH = NAD+ + Pro	1.5.1.2 SACOL1546(proC)
PRPPK	TRUE	ATP + R5P = AMP + PRPP	2.7.6.1 SACOL0544(prsA)
PRPPTA	FALSE	Gln + PRPP = Glu + PP + PRA	2.4.2.14 SACOL1079(purF)
PTA	TRUE	AcP + CoA = AcCoA + P	2.3.1.8 SACOL0634(eutD)
PyrC	FALSE	ATP + HCO3- + Pyr = ADP + OAA + P	6.4.1.1 SACOL1123(pyc)
PyrDH_EC	FALSE	CoA + NAD+ + Pyr = AcCoA + CO2 + H+ + NADH	1.2.4.1 SACOL1102(pdhA) SACOL1103(pdhB) 2.3.1.12 SACOL1104(pdhC) 1.8.1.4 SACOL1105(lpdA)
PyrFLys	FALSE	CoA + Pyr = AcCoA + Formate	2.3.1.54 SACOL0204(pflB)
PyrK	FALSE	ADP + PEP = ATP + Pyr	2.7.1.40 SACOL1745(pyk)
QCytoOR	FALSE	2 CytCox + 2 H+ + QH2 = 2 CytCred + 4 H_cytosol + Q	Q_cytochromeCOR complexIII
R5PI	TRUE	Ru5P = R5P	5.3.1.6 SACOL2329(rpiA)
RPE	TRUE	Ru5P = X5P	5.1.3.1 SACOL1235(rpe)
SAICARS	FALSE	ATP + Asp + CAIR = ADP + P + SAICAR	6.3.2.6 SACOL1075(purC)
SerALD	TRUE	Ser + THF = Gly + MTHF	2.1.2.1 SACOL2105(glyA)
SerDHA	FALSE	Ser = NH3 + Pyr	4.3.1.17 SACOL2544(sdaAA) SACOL2545(sdaAB)
ShiDH	TRUE	DHShi + H+ + NADPH = NADP+ + Shi	1.1.1.25 SACOL1652(aroE)
ShiK	TRUE	ATP + Shi = ADP + Shi3P	2.7.1.71 SACOL1596(aroK)
SuccCoAS	TRUE	ATP + CoA + Succ = ADP + P + SuccCoA	6.2.1.5 SACOL1262(sucC) SACOL1263(sucD)
SuccDH	FALSE	Q + Succ = Fum + QH2	1.3.99.1 SACOL1158(sdhC) SACOL1159(sdhA) SACOL1160(sdhB)
TA	TRUE	GAP + S7P = E4P + Fru6P	2.2.1.2 SACOL1831(tal)
ThrALD	TRUE	Thr = Ald + Gly	4.1.2.5 SACOL1349
ThrS	FALSE	PHomoSer = P + Thr	4.2.3.1 SACOL1363(thrC)
TK1	TRUE	R5P + X5P = GAP + S7P	2.2.1.1 SACOL1377(tkt)
TK2	TRUE	Fru6P + GAP = E4P + X5P	2.2.1.1 SACOL1377(tkt)
TPI	TRUE	DHAP = GAP	5.3.1.1 SACOL0840(tpiA)
TrpS_EC	FALSE	Chor + Gln + PRPP + Ser = CO2 + GAP + Glu + PP + Pyr + Trp	Trp operon 4.1.3.27 SACOL1403(trpE) SACOL1404(trpG) 2.4.2.18 SACOL1405(trpD) 5.3.1.24 SACOL1407(trpF) 4.1.1.48 SACOL1406(trpC) 4.2.1.20 SACOL1408(trpB) SACOL1409(trpA)
Undecapr	FALSE	ATP + Undecaprenol = ADP + Undecaprenyl-P	2.7.1.66 (NWMN_1472) [3.6.1.27 (NWMN_0652) (NWMN_1329) loop from peptidoglycan synthesis]
Urease	FALSE	Urea = CO2 + 2 NH3	3.5.1.5 SACOL2280(ureA) SACOL2281(ureB) SACOL2282(ureC)
ValS_EC	FALSE	Glu + H+ + NADPH + 2 Pyr = CO2 + NADP+ + Val + aKG	Ilv operon 2.2.1.6 SACOL2043(ilvB) SACOL2044 SACOL2199(budB) 1.1.1.86 SACOL2045(ilvC) 4.2.1.9 SACOL2042(ilvD) 2.6.1.42 SACOL0600(ilvE)
