# Supplementary material for: Staphylococcus aureus Transcriptome Data and Metabolic Modelling Investigate the Interplay of Ser/Thr Kinase PknB, Its Phosphatase Stp, the glmR/yvcK Regulon and the cdaA Operon for Metabolic Adaptation
Source: Microorganisms. 2021 Oct 14;9(10):2148. doi: 10.3390/microorganisms9102148 (PMC8537086; doi:10.3390/microorganisms9102148)
Supplement: Supplementary file 1 [file microorganisms-09-02148-s001.zip › suppl9_TableS12_EPM.xlsx]

## Sheet: suppl13_EPM
Table S12. Extreme pathway modes of Staphylococcus aureus NewHG – solution space
#	Activity	Flux sum	Reversible?	Pathlength	Reactions
1	1	1	TRUE	1	(1 AlaTA)
2	1	1	TRUE	1	(1 ASN)
3	1	1	TRUE	1	(1 ButandiolS_EC)
4	1	1	TRUE	1	(1 GluDH)
5	1	1	TRUE	1	(1 LacDH)
6	1	1	TRUE	1	(1 OrnCyc)
7	1	1	TRUE	1	(1 SerALD)
8	1	2	TRUE	2	(1 GluSemiAldDH) (1 ProO)
9	1	2	TRUE	2	(1 ACN) (1 ICitDH)
10	1	2	TRUE	2	(1 ADH) (1 ThrALD)
11	1	2	TRUE	2	(1 AldDH) (1 ThrALD)
12	1	3	TRUE	3	(1 AlaRacemase) (1 D-AlaTA) (-1 GluRacemase)
13	1	1	FALSE	1	(1 AcetoinS_EC)
14	1	1	FALSE	1	(1 BCAA_Ile)
15	1	1	FALSE	1	(1 BCAA_Leu)
16	1	1	FALSE	1	(1 BCAA_Val)
17	1	1	FALSE	1	(1 FormateDH)
18	1	1	FALSE	1	(1 GlnS)
19	1	1	FALSE	1	(1 GluS)
20	1	1	FALSE	1	(1 GlyCleavageSys)
21	1	1	FALSE	1	(1 HisMeta_EC)
22	1	1	FALSE	1	(1 IleS_EC)
23	1	1	FALSE	1	(1 NADH_OP)
24	1	1	FALSE	1	(1 NADK)
25	1	1	FALSE	1	(1 OrnS_EC)
26	1	1	FALSE	1	(1 SerDHA)
27	1	1	FALSE	1	(1 ValS_EC)
28	1	3	FALSE	3	(1 DHFR) (1 DHFS) (1 DHPS)
29	1	2	FALSE	2	(1 ARG) (1 Urease)
30	1	2	FALSE	2	(1 FBP) (1 PFK)
31	1	3	FALSE	3	(1 FTHFL) (1 MethenylTHFCyc) (-1 MethyleneTHFDH)
32	1	2	FALSE	2	(1 AckA) (1 AcP)
33	1	5	FALSE	5	(1 AspK) (-1 AspSemiAldDH) (-1 HomoSerDH) (1 HomoSerK) (1 ThrS)
34	1	5	FALSE	5	(1 AspK) (-1 AspSemiAldDH) (1 DAPDC) (1 DiaminopimS_EC) (1 SuccCoAS)
35	1	2	FALSE	2	(1 CarbaK) (-1 CPS)
36	1	3	FALSE	3	(1 ArgDeimi) (-1 CPS) (-1 OTC)
37	1	6	FALSE	6	(1 ArgSuccLya) (1 ArgSuccS) (1 CPS) (1 FUM) (1 Mae) (1 OTC)
38	1	10	FALSE	4	(5 ATPS) (1 CytochromeCO) (2 NADHQOR) (2 QCytoOR)
39	1	2	FALSE	2	(1 GOT) (1 PyrC)
40	1	5	FALSE	5	(1 ATPS) (-1 GOT) (1 Mae) (-1 Mqo) (1 NADHQOR)
41	1	8	FALSE	7	(1 AKGDC_EC) (1 FUM) (-1 GOT) (2 Mae) (-1 Mqo) (-1 SuccCoAS) (1 SuccDH)
42	1	12	FALSE	9	(1 AKGDC_EC) (3 ATPS) (1 CytochromeCO) (1 FUM) (1 GOT) (1 Mqo) (2 QCytoOR) (-1 SuccCoAS) (1 SuccDH)
43	1	20	FALSE	10	(2 ArgSuccLya) (2 ArgSuccS) (3 ATPS) (2 CPS) (1 CytochromeCO) (2 FUM) (2 GOT) (2 Mqo) (2 OTC) (2 QCytoOR)
44	1	22	FALSE	14	(3 6PGL) (1 ENO) (3 G6PDH) (1 GAPDH) (1 GlcPTS) (3 PGADH) (-2 PGI) (1 PGK) (1 PGM) (1 R5PI) (2 RPE) (1 TA) (1 TK1) (-1 TK2)
45	1	3	FALSE	3	(-1 GOT) (1 PEPCK) (1 PyrK)
46	1	18	FALSE	16	(1 ChorS) (1 DAHPS) (1 DHQ) (1 DHQS) (1 EPSPS) (1 GlcK) (-2 GOT) (2 PEPCK) (1 PGI) (1 PRPPK) (1 R5PI) (-1 RPE) (1 ShiDH) (1 ShiK) (1 TK2) (1 TrpS_EC)
47	1	20	FALSE	16	(1 ChorS) (1 DAHPS) (1 DHQ) (1 DHQS) (1 EPSPS) (1 GlcPTS) (-3 GOT) (3 PEPCK) (1 PGI) (1 PRPPK) (1 R5PI) (-1 RPE) (1 ShiDH) (1 ShiK) (1 TK2) (1 TrpS_EC)
48	1	76	FALSE	29	(3 ADSL) (3 AIRC) (3 AIRS) (5 ATPS) (2 CytochromeCO) (-1 ENO) (3 FGAMS) (3 FUM) (-1 GAPDH) (3 GAR) (3 GARTF) (2 GlcPTS) (3 IMPCyc) (-6 MethenylTHFCyc) (6 MethyleneTHFDH) (3 Mqo) (3 PEPCK) (2 PGI) (-1 PGK) (-1 PGM) (3 PRPPK) (3 PRPPTA) (3 QCytoOR) (2 R5PI) (-2 RPE) (3 SAICARS) (-1 TA) (-1 TK1) (1 TK2)
49	1	9	FALSE	9	(1 ENO) (1 GAPDH) (-1 Glycerol3PDH) (1 GlycerolK) (1 GOT) (-1 PEPCK) (1 PGK) (1 PGM) (1 TPI)
50	1	17	FALSE	11	(2 ENO) (1 FBPALD) (2 GAPDH) (1 GlcK) (2 GOT) (-2 PEPCK) (1 PFK) (1 PGI) (2 PGK) (2 PGM) (1 TPI)
51	1	24	FALSE	16	(3 6PGL) (1 ENO) (3 G6PDH) (1 GAPDH) (1 GlcK) (1 GOT) (-1 PEPCK) (3 PGADH) (-2 PGI) (1 PGK) (1 PGM) (1 R5PI) (2 RPE) (1 TA) (1 TK1) (-1 TK2)
52	1	15	FALSE	11	(2 ENO) (1 FBPALD) (2 GAPDH) (1 GlcPTS) (1 GOT) (-1 PEPCK) (1 PFK) (1 PGI) (2 PGK) (2 PGM) (1 TPI)
53	1	9	FALSE	9	(-1 ENO) (-1 GAPDH) (1 Glycerol3PDH) (-1 GOT) (1 LipidProduct) (1 PEPCK) (-1 PGK) (-1 PGM) (-1 TPI)
54	1	44	FALSE	22	(-1 ENO) (-1 GAPDH) (2 GlcK) (-1 GOT) (3 HisCyc) (3 HisS_EC) (3 IMPCyc) (-3 MethenylTHFCyc) (3 MethyleneTHFDH) (1 PEPCK) (2 PGI) (-1 PGK) (-1 PGM) (3 PRATPPPH) (3 PRATPS) (3 PRFAICARPI) (3 PRPPK) (2 R5PI) (-2 RPE) (-1 TA) (-1 TK1) (1 TK2)
55	1	38	FALSE	20	(3 ATC) (3 CPS) (3 DHO) (3 DHODH) (-1 ENO) (-1 GAPDH) (2 GlcK) (-1 GOT) (3 OMPDC) (3 OPRT) (1 PEPCK) (2 PGI) (-1 PGK) (-1 PGM) (3 PRPPK) (2 R5PI) (-2 RPE) (-1 TA) (-1 TK1) (1 TK2)
56	1	65	FALSE	27	(3 ADSL) (3 AIRC) (3 AIRS) (-1 ENO) (3 FGAMS) (3 FUM) (-1 GAPDH) (3 GAR) (3 GARTF) (2 GlcK) (-1 GOT) (3 IMPCyc) (3 Mae) (-6 MethenylTHFCyc) (6 MethyleneTHFDH) (1 PEPCK) (2 PGI) (-1 PGK) (-1 PGM) (3 PRPPK) (3 PRPPTA) (2 R5PI) (-2 RPE) (3 SAICARS) (-1 TA) (-1 TK1) (1 TK2)
57	1	27	FALSE	18	(3 6PGL) (-1 ENO) (1 FBP) (-1 FBPALD) (3 G6PDH) (-1 GAPDH) (-1 GOT) (1 PEPCK) (3 PGADH) (-3 PGI) (-1 PGK) (-1 PGM) (1 R5PI) (2 RPE) (1 TA) (1 TK1) (-1 TK2) (-1 TPI)
58	1	70	FALSE	23	(-5 ENO) (2 FBP) (-2 FBPALD) (-5 GAPDH) (-5 GOT) (3 HisCyc) (3 HisS_EC) (3 IMPCyc) (-3 MethenylTHFCyc) (3 MethyleneTHFDH) (5 PEPCK) (-5 PGK) (-5 PGM) (3 PRATPPPH) (3 PRATPS) (3 PRFAICARPI) (3 PRPPK) (2 R5PI) (-2 RPE) (-1 TA) (-1 TK1) (1 TK2) (-2 TPI)
59	1	64	FALSE	21	(3 ATC) (3 CPS) (3 DHO) (3 DHODH) (-5 ENO) (2 FBP) (-2 FBPALD) (-5 GAPDH) (-5 GOT) (3 OMPDC) (3 OPRT) (5 PEPCK) (-5 PGK) (-5 PGM) (3 PRPPK) (2 R5PI) (-2 RPE) (-1 TA) (-1 TK1) (1 TK2) (-2 TPI)
60	1	91	FALSE	28	(3 ADSL) (3 AIRC) (3 AIRS) (-5 ENO) (2 FBP) (-2 FBPALD) (3 FGAMS) (3 FUM) (-5 GAPDH) (3 GAR) (3 GARTF) (-5 GOT) (3 IMPCyc) (3 Mae) (-6 MethenylTHFCyc) (6 MethyleneTHFDH) (5 PEPCK) (-5 PGK) (-5 PGM) (3 PRPPK) (3 PRPPTA) (2 R5PI) (-2 RPE) (3 SAICARS) (-1 TA) (-1 TK1) (1 TK2) (-2 TPI)
61	1	62	FALSE	23	(3 ChorM) (3 ChorS) (3 DAHPS) (3 DHQ) (3 DHQS) (-2 ENO) (3 EPSPS) (-2 GAPDH) (1 GlcK) (-8 GOT) (3 IAPTA2) (8 PEPCK) (1 PGI) (-2 PGK) (-2 PGM) (3 PrephDH_EC) (1 R5PI) (-1 RPE) (3 ShiDH) (3 ShiK) (1 TA) (1 TK1) (2 TK2)
62	1	62	FALSE	23	(3 ChorM) (3 ChorS) (3 DAHPS) (3 DHQ) (3 DHQS) (-2 ENO) (3 EPSPS) (-2 GAPDH) (1 GlcK) (-8 GOT) (3 IAPTA1) (8 PEPCK) (1 PGI) (-2 PGK) (-2 PGM) (3 PrephDHA) (1 R5PI) (-1 RPE) (3 ShiDH) (3 ShiK) (1 TA) (1 TK1) (2 TK2)
63	1	64	FALSE	23	(3 ChorM) (3 ChorS) (3 DAHPS) (3 DHQ) (3 DHQS) (-2 ENO) (3 EPSPS) (-2 GAPDH) (1 GlcPTS) (-9 GOT) (3 IAPTA2) (9 PEPCK) (1 PGI) (-2 PGK) (-2 PGM) (3 PrephDH_EC) (1 R5PI) (-1 RPE) (3 ShiDH) (3 ShiK) (1 TA) (1 TK1) (2 TK2)
64	1	64	FALSE	23	(3 ChorM) (3 ChorS) (3 DAHPS) (3 DHQ) (3 DHQS) (-2 ENO) (3 EPSPS) (-2 GAPDH) (1 GlcPTS) (-9 GOT) (3 IAPTA1) (9 PEPCK) (1 PGI) (-2 PGK) (-2 PGM) (3 PrephDHA) (1 R5PI) (-1 RPE) (3 ShiDH) (3 ShiK) (1 TA) (1 TK1) (2 TK2)
65	1	48	FALSE	22	(-1 ENO) (-1 GAPDH) (2 GlcPTS) (-3 GOT) (3 HisCyc) (3 HisS_EC) (3 IMPCyc) (-3 MethenylTHFCyc) (3 MethyleneTHFDH) (3 PEPCK) (2 PGI) (-1 PGK) (-1 PGM) (3 PRATPPPH) (3 PRATPS) (3 PRFAICARPI) (3 PRPPK) (2 R5PI) (-2 RPE) (-1 TA) (-1 TK1) (1 TK2)
66	1	42	FALSE	20	(3 ATC) (3 CPS) (3 DHO) (3 DHODH) (-1 ENO) (-1 GAPDH) (2 GlcPTS) (-3 GOT) (3 OMPDC) (3 OPRT) (3 PEPCK) (2 PGI) (-1 PGK) (-1 PGM) (3 PRPPK) (2 R5PI) (-2 RPE) (-1 TA) (-1 TK1) (1 TK2)
67	1	69	FALSE	27	(3 ADSL) (3 AIRC) (3 AIRS) (-1 ENO) (3 FGAMS) (3 FUM) (-1 GAPDH) (3 GAR) (3 GARTF) (2 GlcPTS) (-3 GOT) (3 IMPCyc) (3 Mae) (-6 MethenylTHFCyc) (6 MethyleneTHFDH) (3 PEPCK) (2 PGI) (-1 PGK) (-1 PGM) (3 PRPPK) (3 PRPPTA) (2 R5PI) (-2 RPE) (3 SAICARS) (-1 TA) (-1 TK1) (1 TK2)
68	1	31	FALSE	21	(1 ChorS) (1 DAHPS) (1 DHQ) (1 DHQS) (-2 ENO) (1 EPSPS) (1 FBP) (-1 FBPALD) (-2 GAPDH) (-4 GOT) (4 PEPCK) (-2 PGK) (-2 PGM) (1 PRPPK) (1 R5PI) (-1 RPE) (1 ShiDH) (1 ShiK) (1 TK2) (-1 TPI) (1 TrpS_EC)
69	1	75	FALSE	24	(3 ChorM) (3 ChorS) (3 DAHPS) (3 DHQ) (3 DHQS) (-4 ENO) (3 EPSPS) (1 FBP) (-1 FBPALD) (-4 GAPDH) (-10 GOT) (3 IAPTA2) (10 PEPCK) (-4 PGK) (-4 PGM) (3 PrephDH_EC) (1 R5PI) (-1 RPE) (3 ShiDH) (3 ShiK) (1 TA) (1 TK1) (2 TK2) (-1 TPI)
70	1	75	FALSE	24	(3 ChorM) (3 ChorS) (3 DAHPS) (3 DHQ) (3 DHQS) (-4 ENO) (3 EPSPS) (1 FBP) (-1 FBPALD) (-4 GAPDH) (-10 GOT) (3 IAPTA1) (10 PEPCK) (-4 PGK) (-4 PGM) (3 PrephDHA) (1 R5PI) (-1 RPE) (3 ShiDH) (3 ShiK) (1 TA) (1 TK1) (2 TK2) (-1 TPI)
71	1	98	FALSE	31	(3 ADSL) (3 AIRC) (3 AIRS) (5 ATPS) (2 CytochromeCO) (-5 ENO) (2 FBP) (-2 FBPALD) (3 FGAMS) (3 FUM) (-5 GAPDH) (3 GAR) (3 GARTF) (-2 GOT) (3 IMPCyc) (-6 MethenylTHFCyc) (6 MethyleneTHFDH) (3 Mqo) (5 PEPCK) (-5 PGK) (-5 PGM) (3 PRPPK) (3 PRPPTA) (3 QCytoOR) (2 R5PI) (-2 RPE) (3 SAICARS) (-1 TA) (-1 TK1) (1 TK2) (-2 TPI)
72	1	76	FALSE	30	(3 ADSL) (3 AIRC) (3 AIRS) (5 ATPS) (2 CytochromeCO) (-1 ENO) (3 FGAMS) (3 FUM) (-1 GAPDH) (3 GAR) (3 GARTF) (2 GlcK) (2 GOT) (3 IMPCyc) (-6 MethenylTHFCyc) (6 MethyleneTHFDH) (3 Mqo) (1 PEPCK) (2 PGI) (-1 PGK) (-1 PGM) (3 PRPPK) (3 PRPPTA) (3 QCytoOR) (2 R5PI) (-2 RPE) (3 SAICARS) (-1 TA) (-1 TK1) (1 TK2)
73	1	3	FALSE	3	(1 AcCoAS) (-1 AckA) (-1 PTA)
74	1	3	FALSE	3	(-1 AckA) (-1 PTA) (1 PyrDH_EC)
75	1	3	FALSE	3	(-1 AckA) (-1 PTA) (1 PyrFLys)
76	1	3	FALSE	3	(1 AckA) (1 CysS_EC) (1 PTA)
77	1	3	FALSE	3	(1 AckA) (1 LeuS_EC) (1 PTA)
78	1	32	FALSE	6	(7 AcCoAC) (8 AckA) (1 FAS) (1 FAS_EC) (7 MCAT) (8 PTA)
79	1	6	FALSE	6	(1 AckA) (1 AspK) (-1 AspSemiAldDH) (-1 HomoSerDH) (1 MetS_EC) (1 PTA)
80	1	74	FALSE	9	(8 AckA) (21 ATPS) (7 CytochromeCO) (1 FAS) (1 FAS_EC) (7 IleMeta_EC) (7 MCAT) (8 PTA) (14 QCytoOR)
81	1	4	FALSE	4	(1 AckA) (1 CitS) (-1 GOT) (1 PTA)
82	1	74	FALSE	9	(8 AckA) (1 FAS) (1 FAS_EC) (-14 GOT) (7 IleMeta_EC) (14 Mae) (7 MCAT) (-14 Mqo) (8 PTA)
83	1	20	FALSE	15	(2 AckA) (1 AlaRacemase) (1 D-alaDimer) (2 GlcK) (1 GluRacemase) (-1 GOT) (1 PEPCK) (2 Peptidoglycan1_EC) (1 Peptidoglycan2_EC) (1 Peptidoglycan3_EC) (1 Peptidoglycan4_EC) (1 Peptidoglycan5_EC) (2 PGI) (2 PTA) (1 Undecapr)
84	1	24	FALSE	15	(2 AckA) (1 AlaRacemase) (1 D-alaDimer) (2 GlcPTS) (1 GluRacemase) (-3 GOT) (3 PEPCK) (2 Peptidoglycan1_EC) (1 Peptidoglycan2_EC) (1 Peptidoglycan3_EC) (1 Peptidoglycan4_EC) (1 Peptidoglycan5_EC) (2 PGI) (2 PTA) (1 Undecapr)
85	1	46	FALSE	20	(2 AckA) (1 AlaRacemase) (1 D-alaDimer) (-4 ENO) (2 FBP) (-2 FBPALD) (-4 GAPDH) (1 GluRacemase) (-5 GOT) (5 PEPCK) (2 Peptidoglycan1_EC) (1 Peptidoglycan2_EC) (1 Peptidoglycan3_EC) (1 Peptidoglycan4_EC) (1 Peptidoglycan5_EC) (-4 PGK) (-4 PGM) (2 PTA) (-2 TPI) (1 Undecapr)
86	1	40	FALSE	7	(-8 AckA) (1 ACS3) (11 ATPS) (4 CytochromeCO) (1 FA_betaOx) (-8 PTA) (7 QCytoOR)
87	1	39	FALSE	7	(-8 AckA) (1 ACS3) (1 FA_betaOx) (-7 GOT) (7 Mae) (-7 Mqo) (-8 PTA)
