# Supplementary material for: Staphylococcus aureus Transcriptome Data and Metabolic Modelling Investigate the Interplay of Ser/Thr Kinase PknB, Its Phosphatase Stp, the glmR/yvcK Regulon and the cdaA Operon for Metabolic Adaptation
Source: Microorganisms. 2021 Oct 14;9(10):2148. doi: 10.3390/microorganisms9102148 (PMC8537086; doi:10.3390/microorganisms9102148)
Supplement: Supplementary file 1 [file microorganisms-09-02148-s001.zip › suppl10_TableS13_twoarry_IDmapping.xlsx]

## Sheet: Sheet1
Table S13. Gene identifiers of two microarray designs (NewHG-Agilent, NCTC 8325- Scienion), mapped to the corresponding genes
				*Averages are given (n=2)
COG	Gene Symbol	Newman	Annotation	WT*	PknB*		NCTC8325		WT	PnkB
L	dnaA	NWMN_0001	chromosomal replication initiation protein	22702.2	9747.05		SA0001	chromosomal replication initiator protein DnaA	938.5	370
L	dnaN	NWMN_0002	DNA polymerase III subunit beta	13938	9028		SA0002	DNA polymerase III subunit beta	1685.5	637
L	recF	NWMN_0003	recombination protein F	16754	9863.5		SA0004	DNA replication/repair protein RecF	10057	9286
L	gyrB	NWMN_0004	DNA gyrase B subunit	15842.8	8376.25		SA0005	DNA gyrase subunit B	7384.25	7708
L	gyrA	NWMN_0005	DNA gyrase A subunit	4006.67	2455.83		SA0006	DNA gyrase subunit A	8015	11267.8
G	yjeF	NWMN_0006	hypothetical protein	308.2	204.5		SA0007	NAD(P)H-hydrate dehydratase	626.5	52
E	hutH	NWMN_0007	histidine ammonia-lyase	737.55	889.51		SA0008	histidine ammonia-lyase	502.25	1630
J	serS	NWMN_0008	seryl-tRNA synthetase	1080	904.2		SA0009	serine--tRNA ligase	643	1206
E	azlC	NWMN_0009	hypothetical protein	3054.5	1836.5		SA0010	AzlC family ABC transporter permease	-12.5	-10.5
S	azlD	NWMN_0010	hypothetical protein	3349.5	2324.5		SAS001	AzlD domain-containing protein	19.5	-12.5
E	metX	NWMN_0011	homoserine O-acetyltransferase	3259	2235.5		SA0011	alpha/beta fold hydrolase	1371	414
S	-	NWMN_0012	hypothetical protein	11492.5	7664		SA0012	DUF2232 domain-containing protein	1600	1711.5
T	-	NWMN_0013	hypothetical protein	11806.9	8288.64		SA0013	cyclic-di-AMP phosphodiesterase GdpP	8333	10589.2
J	rplI	NWMN_0014	50S ribosomal protein L9	20255	13687.5		SA0014	50S ribosomal protein L9	6000.5	7301.5
L	dnaC	NWMN_0015	replicative DNA helicase	9450	6244		SA0015	replicative DNA helicase	3430	3338.5
F	purA	NWMN_0016	adenylosuccinate synthetase	129.434	99.5529		SA0016	adenylosuccinate synthase	235	173
T	vicR	NWMN_0017	two-component response regulator	14153.8	11501.3		SA0017	response regulator transcription factor	1297.5	1484.5
T	vicK	NWMN_0018	sensory box histidine kinase VicK	16183	12557		SA0018	cell wall metabolism sensor histidine kinase WalK	1949.5	2255.5
S	yycH	NWMN_0019	hypothetical protein	6183.5	5258		SA0019	hypothetical protein	1963.5	2349.5
S	yycI	NWMN_0020	hypothetical protein	8122.5	7308.5		SA0020	hypothetical protein	358.5	583.5
R	yycJ	NWMN_0021	metallo-beta-lactamase super	643	472.85		SA0021	MBL fold metallo-hydrolase	15	1.5
F	sasH	NWMN_0022	5'-nucleotidase	2212	1537.5		SA0022	LPXTG cell wall anchor domain-containing protein	651.25	692.5
S	orfX	NWMN_0023	cassette chromosome attachment site ORF	2357	1732		SA0023	SPOUT methyltransferase
	-	NWMN_0024	hypothetical protein	7028.5	3741		SA0078	hypothetical protein	107.25	115.75
R	-	NWMN_0026	hypothetical protein	1773.5	1073.8		SA0080	sulfite exporter TauE/SafE family protein	136.5	118
O	-	NWMN_0027	hypothetical protein	194.6	167.15		SA0082	persulfide response sulfurtransferase CstA	14	-6
R	-	NWMN_0028	metallo-beta-lactamase super	573.1	573.9		SA0083	persulfide dioxygenase-sulfurtransferase CstB	46.5	20
R	-	NWMN_0029	hypothetical protein	7549	6802.5		SA0084	type II sulfide:quinone oxidoreductase Sqr	170	123.5
J	dus	NWMN_0030	hypothetical protein	1746.56	1324.38		SA0085	tRNA-dihydrouridine synthase	1373	1391
K	tFox	NWMN_0031	hypothetical protein	1158	964.6		SA0087	TfoX/Sxy family protein	-40.5	-10.5
G	-	NWMN_0032	hypothetical protein	521.917	358.25
	-	NWMN_0033	hypothetical protein	488.15	277.85
R	-	NWMN_0034	hypothetical protein	332.4	180.85
K	-	NWMN_0035	LysR family regulatory protein	2184	1168
	-	NWMN_0036	hypothetical protein	199.567	90.2767
K	-	NWMN_0037	hypothetical protein	756.4	418.1
	-	NWMN_0038	hypothetical protein	941.125	665.45		SA0088	hypothetical protein	490.5	377
L	-	NWMN_0039	hypothetical protein	5678	2092		SA0089	ATPase	585.5	836.5
	-	NWMN_0040	hypothetical protein	1264	977.35		SA0090	hypothetical protein	-2	45.5
	plc	NWMN_0041	1-phosphatidylinositol phosphodiesterase	4682	4406		SA0091	phosphatidylinositol-specific phospholipase C domain-containing protein	94.75	52
	-	NWMN_0042	hypothetical protein	233.3	166.85		SA0092	tandem-type lipoprotein	299.5	249.5
	-	NWMN_0043	hypothetical protein	310.2	151.65		SA0093	tandem-type lipoprotein	-62	-79.5
	-	NWMN_0044	hypothetical protein	549.85	381.05		SA0095	tandem-type lipoprotein	348	226
	-	NWMN_0045	hypothetical protein	714.45	486.8		SA0096	tandem-type lipoprotein	71.5	59.5
K	-	NWMN_0046	AraC family transcription regulator	5650.43	3129		SA0097	helix-turn-helix domain-containing protein	636.75	711.25
R	hipO	NWMN_0047	M20/M25/M40 family peptidase	22469.5	14502.5		SA0098	amidohydrolase	232.5	257.5
G	norC	NWMN_0048	drug transporter	11828.3	8613		SA0099	MFS transporter	-13	-12
P	nptA	NWMN_0049	Na/Pi cotransporter	1324.5	638		SA0100	Na/Pi cotransporter family protein	579.5	126.5
S	-	NWMN_0050	67 kDa Myosin-crossreactive streptococcal antigen-like protein	159.85	130.36		SA0102	oleate hydratase	-33.75	-46
G	-	NWMN_0051	integral membrane domain-containing protein	178	174.2		SA0103	DMT family transporter	-13	-30
K	norG	NWMN_0052	transcriptional regulator GntR	473.45	330.35		SA0104	HTH-type transcriptional regulator	20	36
R	-	NWMN_0053	hypothetical protein	8311.5	6779.5		SA0105
C	lctP	NWMN_0054	L-lactate permease	20813	19653		SA0106	L-lactate permease	1202.5	1772
M	spa	NWMN_0055	protein A	32902.5	21661.5		SA0107	Immunoglobulin G binding protein A precursor
K	sarH1	NWMN_0056	staphylococcal accessory regulator S	5548.5	4125		SA0108	HTH-type transcriptional regulator SarS	45	-16.5
P	sirC	NWMN_0057	lipoprotein SirC	335.65	186.3		SA0109	staphyloferrin B ABC transporter permease subunit SirC	24	-0.5
P	sirB	NWMN_0058	lipoprotein SirB	330.45	230.1		SA0110	staphyloferrin B ABC transporter permease subunit SirB	95.25	116.75
P	sirA	NWMN_0059	Iron-regulated ABC transporter siderophore-binding protein	451	303.9		SA0111	staphyloferrin B ABC transporter substrate-binding protein SirA	18	2
E	sbnA	NWMN_0060	O-Acetyl serine sulfhydrylase	118.7	88.0425		SA0112	2,3-diaminopropionate biosynthesis protein SbnA	996	263
E	sbnB	NWMN_0061	ornithine cyclodeaminase	245.1	171.3		SA0113	N-[(2S)-2-amino-2-carboxyethyl]-L-glutamate dehydrogenase SbnB EC:1.5.1.51	234	421.5
Q	sbnC	NWMN_0062	siderophore biosynthesis IucC	117.795	99.975		SA0114	staphyloferrin B biosynthesis protein SbnC	226.5	594.75
G	sbnD	NWMN_0063	membrane transporter protein	182.15	107.42		SA0115	staphyloferrin B export MFS transporter	218.5	484
Q	sbnE	NWMN_0064	siderophore biosynthesis IucA	310.55	166.6		SA0116	L-2,3-diaminopropanoate--citrate ligase SbnE	138.5	429.5
Q	sbnF	NWMN_0065	siderophore biosynthesis IucC	324.779	165.329		SA0117	3-(L-alanin-3-ylcarbamoyl)-2-[(2- aminoethylcarbamoyl)methyl]-2-hydroxypropanoate synthase SbnF	188.75	403.25
G	sbnG	NWMN_0066	2-dehydro-3-deoxyglucarate aldolase	468.55	353.9		SA0118	staphyloferrin B biosynthesis citrate synthase SbnG	380.5	551.5
E	sbnH	NWMN_0067	diaminopimelate decarboxylase	550.6	358.55		SA0119	staphyloferrin B biosynthesis decarboxylase SbnH	251.5	619.5
K	sbnI	NWMN_0068	hypothetical protein	281.107	260.971		SA0120	bifunctional transcriptional regulator/O-phospho-L-serine synthase SbnI	1	8
	-	NWMN_0069	hypothetical protein	418.3	400.8
	-	NWMN_0070	hypothetical protein	1758.25	1128.67		SA0121	MFS transporter	87	18.5
I	butA	NWMN_0071	acetoin reductase	10535	6724.71		SA0122	(S)-acetoin forming diacetyl reductase	126.5	202.5
M	galE	NWMN_0072	NAD dependent epimerase/dehydratase	257.2	148.6		SA0123	NAD-dependent epimerase/dehydratase family protein	-50	-49.5
M	cap5M	NWMN_0073	capsular polysaccharide biosynthesis glycosyltransferase	195.2	94.025		SA0124	sugar transferase	18	-27.5
M	cap8H	NWMN_0074	glycosyl transferase group 1	165.225	107.972		SA0125	glycosyltransferase family 4 protein	-24.5	-40
M	cps2H	NWMN_0075	hypothetical protein	141.014	97.8064		SA0126	O-antigen ligase family protein	-81.5	-103
R	-	NWMN_0076	polysaccharide extrusion protein	687.986	472.86		SA0127	lipopolysaccharide biosynthesis protein	-59.5	-91.5
P	sodM	NWMN_0077	superoxide dismutase	7677.5	4835.5		SA0128	Superoxide dismutase [Mn/Fe] 2	381	428
O	sasD	NWMN_0078	cell wall surface anchor	16299	15987		SA0129	cell-wall-anchored protein SasD	565.5	1017.5
K	-	NWMN_0079	GntR family transcriptional regulator	1655.5	1284		SA0130	GntR family transcriptional regulator	75.5	142.5
F	pnp	NWMN_0080	purine nucleoside phosphorylase	464.5	247.4		SA0131	purine-nucleoside phosphorylase	99.5	99.5
G	tet38	NWMN_0081	tetracycline resistance protein	705.25	571.4		SA0132	tetracycline efflux MFS transporter Tet(38)	239	249.5
G	drm	NWMN_0083	phosphopentomutase	9765	3280.65		SA0134	phosphopentomutase	2126.5	3330
P	phnE	NWMN_0084	phosphonates ABC transporter permease protein CC0363	187.3	177.4		SA0135	phosphonate ABC transporter, permease protein PhnE	-37.5	-45.5
P	phnE	NWMN_0085	phosphonates ABC transporter permease	1382.4	395.9		SA0136	phosphonate ABC transporter, permease protein PhnE	60.5	-19
P	phnC	NWMN_0086	amino acid ABC transporter ATP-binding protein	394.6	263.5		SA0137	phosphonate ABC transporter ATP-binding protein	1.5	-37.5
	-	NWMN_0087	hypothetical protein	444.6	266.25		SA0139	hypothetical protein	1.5	-21
F	ushA	NWMN_0088	5' nucleotidase	897.1	589.55		SA0140	bifunctional metallophosphatase/5'-nucleotidase	893	258
	-	NWMN_0090	hypothetical protein	183.75	118.665
	dnaA2	NWMN_0091	replication initiation protein	234.05	175.35
	-	NWMN_0092	hypothetical protein	743.7	397.25
C	adhE	NWMN_0094	bifunctional acetaldehyde-CoA/alcohol dehydrogenase	2149	1974.5		SA0143	bifunctional acetaldehyde-CoA/alcohol dehydrogenase	19	-12.75
M	capA	NWMN_0095	capsular polysaccharide biosynthesis protein CapA	22175.1	20984.8		SA0144	capsular polysaccharide type 5 biosynthesis protein cap5A	597.5	587
D	capB	NWMN_0096	capsular polysaccharide biosynthesis protein CapB	35004	39720		SA0145	tyrosine-protein kinase	1126	1248
G	capC	NWMN_0097	capsular polysaccharide biosynthesis protein CapC	25077.4	27926.6		SA0146	tyrosine-protein phosphatase	444	243.5
M	capD	NWMN_0098	capsular polysaccharide biosynthesis protein CapD	22470	23153		SA0147	polysaccharide biosynthesis protein	2899	2101.5
M	capE	NWMN_0099	capsular polysaccharide biosynthesis protein CapE	15225.6	9109.77		SA0148	NAD-dependent epimerase/dehydratase family protein	1170	848.5
M	capF	NWMN_0100	capsular polysaccharide biosynthesis protein CapF	20892.6	17431.4		SA0149	capsular polysaccharide biosynthesis protein CapF	677	495
M	capG	NWMN_0101	capsular polysaccharide biosynthesis protein CapG	14026.2	14921.6		SA0150	UDP-N-acetylglucosamine 2-epimerase (non-hydrolyzing)	427	303.5
R	capH	NWMN_0102	capsular polysaccharide biosynthesis protein CapH	16318	15606		SA0151	O-acetyltransferase	482	291.5
M	capI	NWMN_0103	capsular polysaccharide biosynthesis protein CapI	7506.5	8439.5		SA0152	capsular polysaccharide biosynthesis protein	2023	1098
	capJ	NWMN_0104	capsular polysaccharide biosynthesis protein CapJ	7092	6850		SA0153	O-antigen ligase family protein	442.5	249
	cap5K	NWMN_0105	capsular polysaccharide biosynthesis protein CapK	8228	7316.5		SA0154	capsular polysaccharide biosynthesis protein	688.5	352.5
M	capL	NWMN_0106	capsular polysaccharide biosynthesis protein CapL	4763	4590.5		SA0155	glycosyltransferase family 4 protein	905.5	494.5
M	capM	NWMN_0107	capsular polysaccharide biosynthesis protein CapM	7694	6793		SA0156	sugar transferase	1240	705.5
M	capN	NWMN_0108	capsular polysaccharide biosynthesis protein CapN	6111.57	4952		SA0157	SDR family oxidoreductase	714.5	463.5
M	capO	NWMN_0109	capsular polysaccharide biosynthesis protein CapO	6405.5	5129		SA0158	nucleotide sugar dehydrogenase	900	513
M	capP	NWMN_0110	capsular polysaccharide biosynthesis protein CapP	4183	3186		SA0159	UDP-N-acetylglucosamine 2-epimerase (non-hydrolyzing)	503	431.5
R	isdI	NWMN_0111	heme-degrading monooxygenase IsdI	95.09	59.855		SA0160	staphylobilin-forming heme oxygenase IsdI	-82	-74.5
S	-	NWMN_0112	hypothetical protein	452.55	412.85		SA0161	DUF454 domain-containing protein	224	35
C	aldA	NWMN_0113	aldehyde dehydrogenase	26749	16720		SA0162	aldehyde dehydrogenase family protein	591.5	2336
P	-	NWMN_0114	cation efflux	1373.6	1311.95		SA0163	cation transporter	1363.5	55
	srpF	NWMN_0115	hypothetical protein	289.9	435.78		SA0165	DUF4242 domain-containing protein	142	172
P	tauB	NWMN_0116	hypothetical protein	22.82	30.73		SA0166	ABC transporter ATP-binding protein	32	-78
P	tauA	NWMN_0117	hypothetical protein	133.05	208.85		SA0167	ABC transporter substrate-binding protein	144	40.5
P	-	NWMN_0118	ABC transporter permease protein	242.4	211.95		SA0168	ABC transporter permease	-4.5	-21.5
I	-	NWMN_0119	hypothetical protein	786.5	692.15		SA0169	acyl-CoA dehydrogenase	776.5	-36.5
S	-	NWMN_0120	hypothetical protein	2696.17	2393		SA0170	DUF2294 domain-containing protein	52	91.5
C	fdh	NWMN_0121	formate dehydrogenase	195.375	79.315		SA0171	NAD-dependent formate dehydrogenase	480.5	2.5
G	-	NWMN_0122	drug transporter	3630	2549		SA0172	MFS transporter	326.5	565.5
Q	ausA	NWMN_0123	gramicidin S synthetase 2 related protein	4105.5	3354		SA0173	non-ribosomal peptide synthetase	1091.75	1678.5
H	acpS	NWMN_0124	4'-phosphopantetheinyl transferase super	3407.5	3496		SA0174	4'-phosphopantetheinyl transferase superfamily protein	216	591.5
S	-	NWMN_0125	hypothetical protein	1991	2028.5		SA0175	DUF1440 domain-containing protein	320	529
E	argB	NWMN_0126	acetylglutamate kinase	519.8	377.25		SA0176	acetylglutamate kinase	15.5	-77.5
E	argJ	NWMN_0127	bifunctional ornithine acetyltransferase/N-acetylglutamate synthase protein	551.45	333.65		SA0177	bifunctional glutamate N-acetyltransferase/amino-acid acetyltransferase ArgJ	-39.5	-18.5
E	argC	NWMN_0128	N-acetyl-gamma-glutamyl-phosphate reductase	485.7	222.15		SA0178	N-acetyl-gamma-glutamyl-phosphate reductase	-34.5	-30.5
E	rocD1	NWMN_0129	ornithine aminotransferase	543.65	263.875		SA0179	ornithine--oxo-acid transaminase	-4.5	-16
E	brnQ1	NWMN_0130	branched-chain amino acid transport system II carrier protein	4508.64	2694.43		SA0180	branched-chain amino acid transport system II carrier protein	1172.5	929.5
Q	entB	NWMN_0131	isochorismatase	1221.67	883.625		SA0181	isochorismatase family protein	456.5	1355
G	ipdC	NWMN_0132	indolepyruvate decarboxylase	5808.5	3595.5		SA0182	alpha-keto acid decarboxylase family protein	1312	3082.5
G	glcA	NWMN_0133	PTS enzyme II glucose-specific factor IIABC component	6208.86	4139		SA0183	PTS glucose EIICBA component	1538.75	2093.75
S	-	NWMN_0134	hypothetical protein	43104	35294.5		SA0184	DUF871 domain-containing protein	1053.5	5375.5
R	murQ	NWMN_0135	N-acetylmuramic acid-6-phosphate etherase	28997.2	21188.5		SA0185	N-acetylmuramic acid 6-phosphate etherase	490.5	3245
G	murP	NWMN_0136	PTS system sucrose specific IIBC component	52494	18908.9		SA0186	permease	967	4619
K	-	NWMN_0137	RpiR family phosphosugar-binding transcriptional regulator	13040	12097.8		SA0187	MurR/RpiR family transcriptional regulator	834	5358.5
	-	NWMN_0138	hypothetical protein	877.55	707.9		SA0188	hypothetical protein	499	209.5
V	hsdR	NWMN_0139	HsdR family type I site-specific deoxyribonuclease	5264.5	4288		SA0189	type I restriction endonuclease subunit R	93.5	233.5
	-	NWMN_0140	hypothetical protein	7312.5	5077.5
	sepS16B	NWMN_0141	hypothetical protein	5801.5	3425
	-	NWMN_0142	hypothetical protein	6453	4850
R	oppF	NWMN_0143	peptide ABC transporter ATP-binding protein	823.1	537.1		SA0198	ABC transporter ATP-binding protein	73.25	10
E	oppB	NWMN_0144	oligopeptide ABC transporter permease protein	129.525	64.83		SA0199	ABC transporter permease	-52	-81.5
E	-	NWMN_0145	peptide ABC transporter permease protein	218.55	189.2		SA0200	ABC transporter permease	-20.5	-26
E	rlp	NWMN_0146	RGD-containing lipoprotein	407.15	331.15		SA0201	peptide ABC transporter substrate-binding protein	-7	-13.25
E	ggt	NWMN_0147	gamma-glutamyltranspeptidase	413.35	283.55		SA0202	gamma-glutamyltransferase	-18.25	-33.25
	-	NWMN_0148	hypothetical protein	602.83	492.43		SA0203	tandem-type lipoprotein	27	53
I	acpD	NWMN_0149	FMN-dependent NADH-azoreductase	851.9	623.4		SA0204	FMN-dependent NADH-azoreductase	-72.5	-85.5
M	-	NWMN_0150	M23/M37 peptidase domain-containing protein	956.957	464.021		SA0205	M23 family metallopeptidase	-56.5	-68.5
G	msmX	NWMN_0151	multiple sugar-binding transport ATP-binding protein	438.95	283		SA0206	sn-glycerol-3-phosphate ABC transporter ATP-binding protein UgpC	-26.5	-54
G	-	NWMN_0152	maltose ABC transporter, maltose-binding protein	640.8	367.3		SA0207	extracellular solute-binding protein	148.5	297.5
G	malC	NWMN_0153	maltose ABC transporter permease protein	1534.47	1029.62		SA0208	sugar ABC transporter permease	15.5	429.5
G	malD	NWMN_0154	maltose ABC transporter permease protein	1153.66	860.914		SA0209	sugar ABC transporter permease	210.5	1191.5
R	-	NWMN_0155	hypothetical protein	1878	1656.5		SA0210	Gfo/Idh/MocA family oxidoreductase	231	702
G	iolE	NWMN_0156	xylose phosphate isomerases	796.9	770.683		SA0212	sugar phosphate isomerase/epimerase	-24	115
S	-	NWMN_0157	hypothetical protein	115.45	102.51		SA0213	membrane protein	-12	-30.5
G	uhpT	NWMN_0158	sugar phosphate antiporter	341	238.51		SA0214	hexose-6-phosphate:phosphate antiporter	-35	-29
T	-	NWMN_0159	AraC family DNA-binding response regulator	991.933	692.698		SA0215	response regulator transcription factor	87	226.5
T	walK	NWMN_0160	sensor histidine kinase	1180.5	651.3		SA0216	sensor histidine kinase	481	474.25
P	-	NWMN_0161	lipoprotein	1437	817.2		SA0217	extracellular solute-binding protein	284	207
C	pflB	NWMN_0162	formate acetyltransferase	43088.5	41826		SA0218	formate C-acetyltransferase	9269	6270.25
O	pflA	NWMN_0163	pyruvate formate-lyase 1 activating enzyme	40784.5	41535.5		SA0219	pyruvate formate lyase-activating protein	3197.5	1124
C	glpQ1	NWMN_0164	hypothetical protein	1520.5	1073.1		SA0220	glycerophosphoryl diester phosphodiesterase	-15.5	-18.5
	-	NWMN_0165	hypothetical protein	83.6664	81.5407		SA0221	hypothetical protein	-53	40.5
	coa	NWMN_0166	staphylocoagulase	64.4	41.41		SA0222	coagulase	-48.5	-48
I	fadA	NWMN_0167	acetyl-CoA acetyltransferase	4677	3390.5		SA0223	thiolase family protein	771	133
I	fadB	NWMN_0168	3-hydroxyacyl-CoA dehydrogenase FadB-like protein	4454.07	2106.79		SA0224	3-hydroxyacyl-CoA dehydrogenase/enoyl-CoA hydratase family protein	5	363.25
I	fadD	NWMN_0169	glutaryl-CoA dehydrogenase FadD-like protein	9248.5	3794.5		SA0225	glutaryl-CoA dehydrogenase	90.5	618
I	fadE	NWMN_0170	acyl-CoA synthetase FadE-like protein	9849.5	2336.5		SA0226	acyl--CoA ligase	172.5	320
I	fadX	NWMN_0171	acetyl-CoA/acetoacetyl-CoA transferase	13978	5737		SA0227	acyl CoA:acetate/3-ketoacid CoA transferase	373.5	703
S	-	NWMN_0172	hypothetical protein	977.5	672.767		SA0228	PrsW family intramembrane metalloprotease	348.5	356
E	-	NWMN_0173	ABC transporter substrate-binding protein	109.66	114.457		SA0229	ABC transporter substrate-binding protein	43	-7
S	-	NWMN_0174	hypothetical protein	391.25	446.65		SA0230	hypothetical protein
C	hmp	NWMN_0175	globin domain-containing protein	816.6	835.95		SA0231	nitric oxide dioxygenase	750.5	422
C	lctE	NWMN_0176	L-lactate dehydrogenase	30548	30362.5		SA0232	L-lactate dehydrogenase	9070.5	8792.5
G	ptsG	NWMN_0177	PTS system glucose-specific IIBC component	594.6	446.3		SA0233	PTS glucose transporter subunit IIB	243.5	471.5
F	rihA	NWMN_0178	inosine-uridine preferring nucleoside hydrolase	759.9	569		SA0234	nucleoside hydrolase	-59.5	-45
G	bglG	NWMN_0179	transcriptional antiterminator BglG	148.25	53.91		SA0235	transcription antiterminator	-43.25	-24.5
G	-	NWMN_0180	phosphoenolpyruvate-dependent sugar phosphotransferase system EIIA 2	81.015	61.615		SA0236	PTS sugar transporter subunit IIA	9	-4.5
G	gatB	NWMN_0181	PTS system component	114.95	82.19		SA0237	PTS galactitol transporter subunit IIB	49	65
G	gatC	NWMN_0182	PTS system component	117.95	163.65		SA0238	PTS galactitol transporter subunit IIC	-46.5	-44.5
E	gutB	NWMN_0183	sorbitol dehydrogenase	480.771	210.564		SA0239	zinc-binding dehydrogenase	135.5	286.5
E	gatD	NWMN_0184	hexitol dehydrogenase	353.4	209.1		SA0240	galactitol-1-phosphate 5-dehydrogenase	-25	-3
I	ispD	NWMN_0185	2-C-methyl-D-erythritol 4-phosphate cytidylyltransferase	11029	6774		SA0241	2-C-methyl-D-erythritol 4-phosphate cytidylyltransferase	658	682.5
E	tarJ'	NWMN_0186	zinc-containing alcohol dehydrogenase	10841	6882		SA0242	zinc-binding dehydrogenase	499	534
M	tagB1	NWMN_0187	tagB protein	7570.5	4443.5		SA0243	CDP-glycerol glycerophosphotransferase family protein	555.5	967.75
M	tagF	NWMN_0188	teichoic acid biosynthesis protein F	1357.5	785.95		SA0244	CDP-glycerol glycerophosphotransferase family protein	591	451.5
I	ispD	NWMN_0189	2-C-methyl-D-erythritol 4-phosphate cytidylyltransferase	8371.8	5142.9		SA0245	D-ribitol-5-phosphate cytidylyltransferase	918	1006.5
E	tarJ	NWMN_0190	alcohol dehydrogenase zinc-containing	21296	12298		SA0246	zinc-binding dehydrogenase	7851	9831
M	tagB2	NWMN_0191	hypothetical protein	11376	8683		SA0247	CDP-glycerol glycerophosphotransferase family protein	10269	13987
M	-	NWMN_0192	glycosyl transferase group 2	18945	13791		SA0248	glycosyltransferase family 2 protein	2618.25	4159.5
D	scdA	NWMN_0193	cell wall biosynthesis protein ScdA	1677.5	1602.5		SA0249	iron-sulfur cluster repair di-iron protein ScdA	16	-36
T	lytS	NWMN_0194	two-component sensor histidine kinase	4969.71	3105.29		SA0250	sensor histidine kinase	412.5	323.75
K	lytR	NWMN_0195	two-component response regulator	674.7	392.35		SA0251	DNA-binding response regulator	92.5	57.5
R	lrgA	NWMN_0196	murein hydrolase regulator LrgA	2097.43	1258.34		SA0252	antiholin-like murein hydrolase modulator LrgA	1633	5951
M	lrgB	NWMN_0197	antiholin-like protein LrgB	513.85	442.4		SA0253	antiholin-like protein LrgB	2664	6816
K	-	NWMN_0198	transcriptional regulator GntR	1225.8	981.125		SA0254	GntR family transcriptional regulator	136	78
G	ptbA	NWMN_0199	PTS system beta glucosides specific IIAB component	1570	665.9		SA0255	hypothetical protein	439.5	79
G	bglA	NWMN_0200	6-phospho-beta-glucosidase	1071.45	858.35		SA0256	6-phospho-beta-glucosidase	473	637.5
Q	ubiE	NWMN_0201	hypothetical protein	276.02	263.58		SA0257	class I SAM-dependent methyltransferase	-17	-25
G	rbsK	NWMN_0202	ribokinase	1977.14	1528.79		SA0258	ribokinase	300	705.5
G	rbsD	NWMN_0203	D-ribose pyranase	3159	983.4		SA0259	D-ribose pyranase	1939	4073
G	rbsU	NWMN_0204	ribose transporter RbsU	1492.5	1034		SA0260	ribose transporter RbsU	1934.5	3755.5
K	rbsR	NWMN_0205	ribose transcriptional repressor RbsR	1827.5	1506.5		SA0261	LacI family transcriptional regulator	-18	-48
G	-	NWMN_0208	drug transporter	162.5	95.75		SA0263	MFS transporter	16.5	19
M	-	NWMN_0209	choloylglycine hydrolase	1149.5	617.3		SA0264	linear amide C-N hydrolase	259	401.5
M	lytM	NWMN_0210	peptidoglycan hydrolase	490.6	263.35		SA0265	glycine-glycine endopeptidase LytM	553.5	307
V	-	NWMN_0211	ABC transporter ATP-binding protein	285.571	278.857		SA0266	ABC transporter ATP-binding protein	-10	-56.5
V	-	NWMN_0212	hypothetical protein	499.6	432.4		SA0267	ABC transporter permease	65.5	14
	-	NWMN_0213	hypothetical protein	193.75	124.075		SA0268	ABC transporter permease	70	43
	-	NWMN_0215	hypothetical protein	126.85	63.665		SA0269	hypothetical protein	375	54
	-	NWMN_0216	hypothetical protein	479.1	331.2
	-	NWMN_0217	hypothetical protein	87.17	16.318
R	ssaA	NWMN_0218	secretory antigen SsaA-like protein	1721	1202.5		SA0270	CHAP domain-containing protein	5	0.5
S	esxA	NWMN_0219	hypothetical protein	21233.5	28798.5		SA0271	WXG100 family type VII secretion effector EsxA	-8.5	64
S	esaA	NWMN_0220	hypothetical protein	1054.08	675.7		SA0272	type VII secretion protein EsaA	-9.5	-13.75
	essA	NWMN_0221	hypothetical protein	170.85	142.4		SA0273	type VII secretion protein EssA	-63.5	-11.5
S	essB	NWMN_0222	hypothetical protein	597.9	468.65		SA0275	type VII secretion protein EssB	18.5	39.5
D	essC	NWMN_0223	diarrheal toxin	1686.5	1067.5		SA0276	type VII secretion protein EssC	17.5	60
	esaC	NWMN_0224	hypothetical protein	871.85	670.4		SA0277	type VII secretion substrate EsaC	88	113
	esxB	NWMN_0225	hypothetical protein	1127.5	719.75		SA0278	WXG100 family type VII secretion effector EsxB	-10.5	7.5
	-	NWMN_0226	hypothetical protein	1150.5	927.2		SA0279	DUF5081 family protein	64	3.5
	-	NWMN_0227	hypothetical protein	996.1	924.1		SA0280	hypothetical protein	78.5	101.5
S	-	NWMN_0228	hypothetical protein	5655	4071		SA0281	hypothetical protein	118.75	137
	-	NWMN_0230	hypothetical protein	310.2	223.15		SA0283	DUF5079 family protein	28	9
	-	NWMN_0231	hypothetical protein	339.1	223.1		SA0284	DUF5080 family protein	-66.5	-72
	-	NWMN_0233	hypothetical protein	1430	968.5		SA0286	TIGR01741 family protein	375	156.5
	-	NWMN_0234	hypothetical protein	3859	2796
		NWMN_0236	hypothetical protein	1766	1261
	-	NWMN_0244	hypothetical protein	1793.5	1171		SA0290	TIGR01741 family protein	998.5	532.5
	-	NWMN_0245	hypothetical protein	1120.9	937.2		SA0291	DUF4467 domain-containing protein	396	186.5
	-	NWMN_0246	hypothetical protein	1340	1576		SA0292	DUF4064 domain-containing protein	754.5	584.5
P	-	NWMN_0247	formate/nitrite transporter	2327.5	2272.5		SA0293	formate/nitrite transporter family protein	428.5	461
E	brnQ2	NWMN_0248	branched-chain amino acid transport system II carrier protein	2617	1834.5		SA0294	branched-chain amino acid transport system II carrier protein	316.5	189
R	-	NWMN_0249	5'-nucleotidase	5906	5107.5		SA0295	5'-nucleotidase, lipoprotein e(P4) family	81.5	32.5
V	-	NWMN_0250	ABC transporter permease protein	7048.5	7388.5		SA0296	ABC transporter permease	987.5	103
V	-	NWMN_0251	ABC transporter ATP-binding protein	6531.5	7284		SA0297	ABC transporter ATP-binding protein	858	766
G	pfoR	NWMN_0252	perfringolysin O regulator protein	23836.5	12101.5		SA0298	transcriptional regulator	557	625.5
G	-	NWMN_0253	PfkB family carbohydrate kinase	999.7	489.583		SA0299	PfkB family carbohydrate kinase	-48	-71
Q	-	NWMN_0254	hypothetical protein	1521.5	710.65		SA0301	pseudouridine-5'-phosphate glycosidase	221.5	-43
F	nupC	NWMN_0255	pyrimidine nucleoside transporter	422.25	322.75		SA0302	NupC/NupG family nucleoside CNT transporter	-38.5	2
E	-	NWMN_0256	sodium:solute symporter	1373	929.45		SA0303	sodium/solute symporter	259.5	910.5
E	nanA	NWMN_0257	N-acetylneuraminate lyase	1982.36	1374.14		SA0304	N-acetylneuraminate lyase	301	622
K	-	NWMN_0258	ROK	7081	3903		SA0305	ROK family protein	764.5	174.5
K	rpiR	NWMN_0259	hypothetical protein	3550.5	2017.5		SA0306	MurR/RpiR family transcriptional regulator	99.5	273
G	nanE	NWMN_0260	N-acetylmannosamine-6-phosphate 2-epimerase	6496	4132.5		SA0307	N-acetylmannosamine-6-phosphate 2-epimerase	344.5	891.5
S	-	NWMN_0261	hypothetical protein	1415.5	783.45		SA0308	YjiH family protein	-46	-5
R	geh	NWMN_0262	lipase	5258.14	3113.29		SA0309	YSIRK domain-containing triacylglycerol lipase Lip2/Geh	862.5	930.75
L		NWMN_0263	integrase	1786.5	1298
	-	NWMN_0265	hypothetical protein	7342	4135.5
K	-	NWMN_0266	hypothetical protein	5566.5	3322
	-	NWMN_0267	hypothetical protein	1051.7	989.25
K	-	NWMN_0268	anti repressor	198.8	94.665
	-	NWMN_0285	hypothetical protein	1158	597.85
	-	NWMN_0286	hypothetical protein	1097.05	788.7
	-	NWMN_0287	hypothetical protein	929.15	937.35
	-	NWMN_0288	hypothetical protein	222.9	114.67
R		NWMN_0289	hypothetical protein	355.95	306.8
		NWMN_0290	hypothetical protein	202.75	167.85
	-	NWMN_0291	hypothetical protein	84.98	66.885
	-	NWMN_0292	hypothetical protein	13.02	18.23
	-	NWMN_0293	hypothetical protein	286.9	246.95
	-	NWMN_0294	hypothetical protein	178.25	121.22
	-	NWMN_0295	hypothetical protein	166.45	136.65
	-	NWMN_0296	hypothetical protein	241.1	203.85
	-	NWMN_0297	hypothetical protein	155.2	287.85
	-	NWMN_0298	hypothetical protein	24.385	101.84
	-	NWMN_0299	hypothetical protein	65.47	61.805
J	-	NWMN_0300	hypothetical protein	346.8	203.4
	-	NWMN_0301	hypothetical protein	102.44	79.15
S	-	NWMN_0302	hypothetical protein	425.675	303.35
	-	NWMN_0303	hypothetical protein	128	84.465
E	-	NWMN_0304	phage minor structural protein	128.05	90.2
		NWMN_0306	phiETA ORF57-like protein	4276	820.1
I	-	NWMN_0314	hypothetical protein	1791.5	1389		SA0310	alpha/beta hydrolase	23	14.5
C	yqiG	NWMN_0315	NADH-dependent flavin oxidoreductase Oye	2191.5	1436.5		SA0311	trimethylamine dehydrogenase
C	-	NWMN_0316	hypothetical protein	1288.54	975.771		SA0312	LLM class flavin-dependent oxidoreductase	277	108
E	-	NWMN_0317	glycine cleavage system protein H	1688	1323		SA0313	glycine cleavage system protein H	492.5	404.5
R	-	NWMN_0318	hypothetical protein	1229.36	1004.24		SA0314	protein-ADP-ribose hydrolase	314	116.5
K	-	NWMN_0319	hypothetical protein	1048.76	722.343		SA0315	NAD-dependent deacetylase	196	151.5
H	lplA1	NWMN_0320	lipoate-protein ligase A	867.2	520.35		SA0316	lipoate--protein ligase	468.5	436
M	-	NWMN_0321	oxidoreductase	9043	8219.5		SA0317	aldehyde reductase	858.5	1105.5
S	ulaA	NWMN_0322	ascorbate-specific PTS system enzyme IIC	686.15	483.6		SA0318	PTS ascorbate transporter subunit IIC	972.5	5573
G	-	NWMN_0323	hypothetical protein	1311	895.45		SA0319	hypothetical protein
G	-	NWMN_0324	PTS system IIA component	847.743	494.257		SA0320	PTS sugar transporter subunit IIA	510.5	2736.5
G	-	NWMN_0325	BglG family transcriptional antiterminator	558.3	332.95		SA0321	PRD domain-containing protein	986.25	3864
K	mepR	NWMN_0326	MarR family regulatory protein	307.05	254.65		SA0322	multidrug efflux transporter transcriptional repressor MepR	4673.5	5150.5
V	mepA	NWMN_0327	MATE efflux	113.717	92.6033		SA0323	multidrug efflux MATE transporter MepA	15190	11461
S	mepB	NWMN_0328	hypothetical protein	322.55	289.1		SA0324	hypothetical protein
G	glpT	NWMN_0329	glycerol-3-phosphate transporter	220.1	173.75		SA0325	glycerol-3-phosphate transporter	95.5	52
E	gloA	NWMN_0330	glyoxalase	14237	9138		SA0326	glyoxalase	355.5	117.5
C	-	NWMN_0331	luciferase-like monooxygenase	8437	5991.5		SA0327	LLM class flavin-dependent oxidoreductase	530.5	256
R	-	NWMN_0332	NADPH-dependent FMN reductase	1438.93	1243.46		SA0328	NAD(P)H-dependent oxidoreductase	145	176
S	yeiH	NWMN_0333	hypothetical protein	605.407	427.945		SA0329	YeiH family putative sulfate export transporter	-30	-68
	-	NWMN_0334	hypothetical protein	718.9	523.35
J	ydaF	NWMN_0335	hypothetical protein	13727.5	7219.5		SA0330	GNAT family N-acetyltransferase	144.5	11
P	efeO	NWMN_0336	lipoprotein	2392.5	1266.5		SA0331	EfeM/EfeO family lipoprotein	35.5	-1.5
P	efeB	NWMN_0337	Dyp-type peroxidase	2148.5	1458		SA0332	deferrochelatase/peroxidase EfeB	-10	-6.5
P	efeU	NWMN_0338	hypothetical protein	776.45	509.7		SA0333	FTR1 family iron permease	-24.5	-16
U	tatC	NWMN_0339	Sec-independent protein translocase TatC	4771	2570.5		SA0334	twin-arginine translocase subunit TatC	546	74
U	tatA	NWMN_0340	mttA/Hcf106 -related protein	4032.5	2122.5		SA0335	twin-arginine translocase TatA/TatE family subunit	-19	-21
R	-	NWMN_0341	hypothetical protein	1901	852.6		SA0336	DUF1398 domain-containing protein	256.5	219
	-	NWMN_0342	hypothetical protein	1155.55	1004.75		SA0338	DUF3169 family protein	388.5	574.5
V	-	NWMN_0343	ABC transporter ATP-binding protein	1312.5	1294.5		SA0339	ABC transporter ATP-binding protein	365.5	643
	-	NWMN_0344	hypothetical protein	1425.5	763.4		SA0340	ABC-2 transporter permease	233	385.5
S	ltrA	NWMN_0345	hypothetical protein	689	520.25		SA0341	hypothetical protein	-33.5	-40.5
I	thlA	NWMN_0346	acetyl-CoA acetyltransferase	4259.25	3588		SA0342	acetyl-CoA C-acetyltransferase	293.5	700
R	-	NWMN_0347	hypothetical protein	3031.5	1972.25		SA0343	cyclase family protein	19.5	2.5
E	metE	NWMN_0348	5-methyltetrahydropteroyltriglutamate--homocysteine methyltransferase	4859	2409		SA0344	5-methyltetrahydropteroyltriglutamate-- homocysteine S-methyltransferase	-13	-4
E	metH	NWMN_0349	bifunctional homocysteine S-methyltransferase/5,10-methylenetetrahydrofolate reductase protein	1717	935.764		SA0345	bifunctional homocysteine S-methyltransferase/methylenetetrahydrofolate reductase	-21.75	-23.5
E	metC2	NWMN_0350	trans-sulfuration enzyme	1504	698.65		SA0346	PLP-dependent transferase	54	-24
E	metB	NWMN_0351	Cys/Met metabolism PLP-dependent enzyme	2747	1535.5		SA0347	aminotransferase class I/II-fold pyridoxal phosphate-dependent enzyme	68.5	133
	-	NWMN_0352	hypothetical protein	473.3	153.4
K	parB	NWMN_0353	ParB family chromosome partioning protein	39170.5	2802		SA0348	ParB/RepB/Spo0J family partition protein	273	288
M	kefA	NWMN_0354	hypothetical protein	5443	3792		SA0349	mechanosensitive ion channel family protein	657.5	469.5
J	ychF	NWMN_0355	translation-associated GTPase	3778.33	3052.33		SA0351	redox-regulated ATPase YchF	1158	743.5
	-	NWMN_0356	hypothetical protein	566.45	605.35		SAS009	hypothetical protein	269.5	184.5
J	rpsF	NWMN_0357	30S ribosomal protein S6	9047.5	7724		SA0352
L	ssb	NWMN_0358	bacteriophage L54a single-stranded DNA binding protein	9887	7831		SA0353	single-stranded DNA-binding protein	75085.5	52781
J	rpsR	NWMN_0359	30S ribosomal protein S18	506.075	452		SA0354	30S ribosomal protein S18	8564	5955.5
	-	NWMN_0360	hypothetical protein	339.45	231.85		SA0355	Abi family protein	-87	-89
L	-	NWMN_0361	integrase-like protein	699.21	390.11
	seIx	NWMN_0362	exotoxin 2	2146.25	1830.5		SA0357	toxin	-68.5	-84
S	-	NWMN_0363	hypothetical protein	257.25	245.05		SA0358	YxeA family protein	-71	-47.5
S	-	NWMN_0364	hypothetical protein	19743	45632.5		SA0359	peptidase	301.5	525
K	-	NWMN_0365	hypothetical protein	959	1060.5		SAS010	helix-turn-helix transcriptional regulator	-53.5	-34.5
S	-	NWMN_0366	hypothetical protein	660.45	1355		SA0360	GlsB/YeaQ/YmgE family stress response membrane protein	167	178.5
G	-	NWMN_0367	phosphoglycerate mutase	1247.2	791.85		SA0361	histidine phosphatase family protein	38.5	25
	-	NWMN_0368	hypothetical protein	1258.5	893.8		SA0362
	-	NWMN_0369	hypothetical protein	5202.07	3793.21		SA0363	NDxxF motif lipoprotein	143	32
	-	NWMN_0370	hypothetical protein	3353	2184.5		SA0364		-25	-8.5
O	ahpF	NWMN_0371	alkyl hydroperoxide reductase subunit F	37990.5	32609.5		SA0365	alkyl hydroperoxide reductase subunit F	9438	15183.5
O	ahpC	NWMN_0372	alkyl hydroperoxide reductase subunit C	63419.8	48717		SA0366	peroxiredoxin	18823.5	31817
C	nfrA	NWMN_0373	NAD(P)H-flavin oxidoreductase	2133	1333.85		SA0367	NADPH-dependent oxidoreductase	502.5	859
R	tcyP	NWMN_0374	sodium:dicarboxylate symporter	2071.5	2856.5		SA0368	L-cystine transporter	165.5	203.5
	-	NWMN_0375	hypothetical protein	8901.25	6305.75		SA0370	hypothetical protein	57.5	21
	-	NWMN_0376	hypothetical protein	23952.5	14429		SA0371	hypothetical protein	348.5	393
	yflT	NWMN_0377	hypothetical protein	4931	9410		SA0372	hypothetical protein	629.5	1469
F	xprT	NWMN_0378	xanthine phosphoribosyltransferase	38005	23800		SA0373	xanthine phosphoribosyltransferase	1433.5	316
F	pbuX	NWMN_0379	xanthine permease	50550	29151		SA0374	purine permease	1737.5	872.5
F	guaB	NWMN_0380	inosine-5'-monophosphate dehydrogenase	64452.5	49939.5		SA0375	IMP dehydrogenase	6724.5	5661
F	guaA	NWMN_0381	bifunctional GMP synthase/glutamine amidotransferase protein	31688	27467		SA0376	glutamine-hydrolyzing GMP synthase	3209.5	3256.75
	-	NWMN_0382	hypothetical protein	837.55	432.05		SA0377	hypothetical protein	32	-50
T	-	NWMN_0383	hypothetical protein	282.7	204.125		SA0378	type II toxin-antitoxin system PemK/MazF family toxin	966	22
L	tnp	NWMN_0384	transposase	412.75	265.65		SA0379	transposase	-37.5	-36.5
S	-	NWMN_0386	hypothetical protein	663.2	403.45		SA0380	DUF1304 domain-containing protein	-41	-17
M	-	NWMN_0387	hypothetical protein	1340.57	699.883		SA0381	SDR family oxidoreductase	179.5	22.5
	ssl1	NWMN_0388	superantigen-like protein	2362.5	1843		SA0382	superantigen-like protein SSL1	42.5	-13.5
	ssl2	NWMN_0389	superantigen-like protein	88.245	94.51		SA0383	superantigen-like protein SSL2	4.5	-46
	ssl3	NWMN_0390	superantigen-like protein	734.65	363.1		SA0384	superantigen-like protein SSL3	-50	-91.5
	ssl4	NWMN_0391	superantigen-like protein	127.6	89.035		SA0385	superantigen-like protein SSL4	-39	-37.5
	ssl5	NWMN_0392	superantigen-like protein 5	37.045	59.625		SA0386	superantigen-like protein SSL5	9	-23.5
	ssl6	NWMN_0393	superantigen-like protein	64.665	92.035
	ssl7	NWMN_0394	superantigen-like protein 7	80.395	58.895		SA0387	superantigen-like protein SSL7	-68.5	-86
	ssl8	NWMN_0395	superantigen-like protein	161.35	153.05		SA0388	superantigen-like protein SSL8	149.5	113
	ssl9	NWMN_0396	superantigen-like protein	99.83	59.255		SA0389	superantigen-like protein SSL9	-31.5	-22
	ssl10	NWMN_0397	superantigen-like protein	417.25	372.9		SA0390	superantigen-like protein SSL10	-58	-89
V	hsdM	NWMN_0398	type I restriction-modification system M subunit	5095.5	2744		SA0391	type I restriction-modification system subunit M	1564	1212.75
V	hsdS	NWMN_0399	restriction modification system specificity subunit	2857.5	1422		SA0392	restriction endonuclease subunit S	180.5	70
	ssl11	NWMN_0400	superantigen-like protein	160.55	160.58		SA0393	superantigen-like protein SSL11	147	-36
	-	NWMN_0401	hypothetical protein	505.69	499.46		SA0394	FKLRK protein	-54	-50.5
	-	NWMN_0402	hypothetical protein	3161	3773.21		SA0395	myeloperoxidase inhibitor SPIN	-44.5	1.5
	lpl1	NWMN_0403	hypothetical protein	337.2	191.3		SA0396	tandem-type lipoprotein Lpl1	-18.5	-79.5
		NWMN_0404	staphylococcal tandem lipoprotein	776.5	511.3
	lpl3	NWMN_0405	staphylococcal tandem lipoprotein	511.35	332.6
	lpl7	NWMN_0406	staphylococcal tandem lipoprotein	194.2	221.6		SA0403	tandem-type lipoprotein	48	8.5
	lpl5nm	NWMN_0408	staphylococcal tandem lipoprotein	579.55	335.5		SA0398	tandem-type lipoprotein	-51	-59
	lpl13	NWMN_0409	staphylococcal tandem lipoprotein	575.9	335.95		SA0399	tandem-type lipoprotein	19.5	4
	lpl7nm	NWMN_0410	staphylococcal tandem lipoprotein	1679.5	1172.9		SA0405
	lpl2	NWMN_0412	staphylococcal tandem lipoprotein	7587	4103.5		SA0397	tandem-type lipoprotein	275.5	231.5
U	-	NWMN_0413	hypothetical protein	8284	6017		SA0406	membrane protein	1950	1737.5
	-	NWMN_0414	hypothetical protein	9021.5	6610.5		SA0407	hypothetical protein	1081	1124
	-	NWMN_0415	hypothetical protein	4480.5	3504.5		SA0408	hypothetical protein	265.5	273
	-	NWMN_0416	hypothetical protein	1788.5	1548.5		SA0409
R	cobW	NWMN_0417	cobalamin synthesis protein	116.45	89.925		SA0410	GTP-binding protein	155	128
C	ndhF	NWMN_0418	NADH dehydrogenase subunit 5	3418	1810		SA0411	NADH dehydrogenase subunit 5	570	2441.5
S	-	NWMN_0419	hypothetical protein	2535.25	1643.5		SA0412	DUF2309 family protein	2489.5	10926.5
S	-	NWMN_0420	hypothetical protein	4460	3278.5		SA0413	DUF2294 domain-containing protein	213	580
I	-	NWMN_0421	hypothetical protein	1884.5	1196.5		SA0415	phosphatase PAP2 family protein	890.5	1102.5
R	est	NWMN_0422	hypothetical protein	1532.14	1074.23		SA0416	alpha/beta fold hydrolase	376.5	567
R	-	NWMN_0423	sodium-dependent symporter protein	80.0575	48.0475		SA0417	sodium-dependent transporter	266	29
E	cysM	NWMN_0424	cysteine synthase	113.47	103.085		SA0418	cysteine synthase family protein	105	-13.5
E	yrhB	NWMN_0425	trans-sulfuration enzyme	193.65	170.7		SA0419	bifunctional cystathionine gamma-lyase/homocysteine desulfhydrase	127	16
P	metN	NWMN_0426	ABC transporter ATP-binding protein	255.25	293.45		SA0420	methionine ABC transporter ATP-binding protein	173	15
P	metI	NWMN_0427	ABC transporter permease protein	578.761	461.589		SA0421	ABC transporter permease	265.5	167
P	-	NWMN_0428	ABC transporter substrate-binding protein	1690.5	1420.3		SA0422	dipeptide ABC transporter glycylmethionine-binding lipoprotein	113	14
M	sle1	NWMN_0429	secretory antigen SsaA-like protein	18499.5	7261		SA0423	autolysin/adhesin Aaa	30446.2	9172.25
	-	NWMN_0430	hypothetical protein	392.7	185.905		SA0424	hypothetical protein	428	227
L	-	NWMN_0431	MutT/nudix	1553	1258		SA0425	NUDIX domain-containing protein	97.5	86.5
K	-	NWMN_0432	hypothetical protein	577.7	420.35		SA0426	GNAT family N-acetyltransferase	39	30
S	-	NWMN_0433	hypothetical protein	2051	1374		SA0427	YibE/F family protein	90.5	196
S	-	NWMN_0434	hypothetical protein	2135	1064.95		SA0428	YibE/F family protein	244.5	282
K	gltC	NWMN_0435	LysR family transcriptional regulator	411.65	186.6		SA0429	LysR family transcriptional regulator	-44.5	-65
E	gltB	NWMN_0436	glutamate synthase large subunit	430.65	267.1		SA0430	glutamate synthase large subunit	0.75	-12.75
E	gltD	NWMN_0437	glutamate synthase subunit beta	687.807	463.157		SA0431
G	treP	NWMN_0438	PTS system trehalose-specific IIBC component	1033.2	1266.85		SA0432	PTS trehalose transporter subunit IIBC	10954.5	13993
G	treC	NWMN_0439	alpha amylase	581.65	585.6		SA0433	alpha,alpha-phosphotrehalase	5820.5	8201.25
K	treR	NWMN_0440	trehalose operon repressor	444.8	452.3		SA0434	trehalose operon repressor	431.5	718.5
R	-	NWMN_0441	acetyltransferase GNAT	1974.29	1273.21		SA0435	N-acetyltransferase	347	266
L	dnaX	NWMN_0442	DNA polymerase III gamma subunit	6501	3674.5		SA0436	DNA polymerase III subunit gamma/tau	1928.25	1498.5
S	-	NWMN_0443	hypothetical protein	21801	17228.5		SA0437	YbaB/EbfC family nucleoid-associated protein	2211	2344.5
L	recR	NWMN_0444	recombination protein RecR	4707	2353.05		SA0438	recombination protein RecR	1562	919.5
E	ldcC	NWMN_0445	Orn/Lys/Arg decarboxylase	737.55	608.05		SA0439	aminotransferase class V-fold PLP-dependent enzyme	26	8.5
F	tmk	NWMN_0446	thymidylate kinase	1181.5	910.55		SA0440	dTMP kinase	132.5	126
S	-	NWMN_0447	hypothetical protein	5102.5	3401.5		SA0441	hypothetical protein	2218	2664
L	holB	NWMN_0448	DNA polymerase III delta prime subunit	5206.5	3027		SA0442	DNA polymerase III subunit delta'	542.5	381
S	-	NWMN_0449	hypothetical protein	5200.5	3552		SA0443		1273.5	1106.5
S	yabA	NWMN_0450	DNA replication intiation control protein YabA	934.4	718.6		SA0444	DNA replication initiation control protein YabA	81.5	45
R	-	NWMN_0451	hypothetical protein	142.25	82.095		SA0445	tRNA1(Val) (adenine(37)-N6)-methyltransferase	200.5	137
R	-	NWMN_0452	tetrapyrrole methylase	512.85	312.3		SA0447	16S rRNA (cytidine(1402)-2'-O)-methyltransferase	292	145
R	metS	NWMN_0453	methionyl-tRNA synthetase	4914.5	3235		SA0448	methionine--tRNA ligase	2320.75	2579.25
L	ycfH	NWMN_0454	TatD related DNase	4463	3673.5		SA0449	TatD family deoxyribonuclease	3074	3468.5
L	rnmV	NWMN_0455	hypothetical protein	2865.21	2001.14		SA0450	ribonuclease M5	1343	482.5
J	ksgA	NWMN_0456	dimethyladenosine transferase	1881.5	1386.7		SA0451	16S rRNA (adenine(1518)-N(6)/adenine(1519)-N(6))- dimethyltransferase RsmA	586	296.5
S	veg	NWMN_0457	hypothetical protein	1579.5	3237		SA0452	hypothetical protein	2425	1112
I	ipk	NWMN_0458	4-diphosphocytidyl-2-C-methyl-D-erythritol kinase	8234.5	6452.5		SA0453	4-(cytidine 5'-diphospho)-2-C-methyl-D-erythritol kinase	668.5	434
F	purR	NWMN_0459	purine operon repressor	65173.5	65171		SA0454	pur operon repressor	5106.5	3608
J	yabJ	NWMN_0460	endoribonuclease L-PSP	65175	65168.5		SA0455
M	spoVG	NWMN_0461	regulatory protein SpoVG	14309	23784		SA0456	septation protein SpoVG	1305	1396.5
M	glmU	NWMN_0462	UDP-N-acetylglucosamine pyrophosphorylase	14893	9210		SA0457	bifunctional UDP-N-acetylglucosamine diphosphorylase/glucosamine-1-phosphate N-acetyltransferase GlmU	3941	5358.5
F	prs	NWMN_0463	ribose-phosphate pyrophosphokinase	15908	11539		SA0458	ribose-phosphate diphosphokinase	4873.5	7190.5
J	rplY	NWMN_0464	50S ribosomal protein L25/general stress protein Ctc	3461	2732.5		SA0459	50S ribosomal protein L25	5639	6114.5
J	pth	NWMN_0465	peptidyl-tRNA hydrolase	7249.5	5164		SA0460	aminoacyl-tRNA hydrolase	308.5	228.5
L	mfd	NWMN_0466	transcription-repair coupling factor	3029.5	2133		SA0461	transcription-repair coupling factor	947.5	784
R	-	NWMN_0467	hypothetical protein	4975	3155.5		SA0462	polysaccharide biosynthesis protein	1694.75	1718
R	mazG	NWMN_0468	tetrapyrrole methylase	13847.5	10262.5		SA0463	nucleotide pyrophosphohydrolase	305	359
J	-	NWMN_0470	hypothetical protein	3178	1828.5		SA0466	RNA-binding protein S1	1063.5	914
D	tilS	NWMN_0471	hypothetical protein	11676	8269.5		SA0467	tRNA lysidine(34) synthetase TilS	1989.5	560
F	hpt	NWMN_0472	hypoxanthine phosphoribosyltransferase	8833	6402		SA0468	hypoxanthine phosphoribosyltransferase	3606.5	1533.5
O	ftsH	NWMN_0473	ATP-dependent metalloprotease FtsH	16309.5	11768.5		SA0469	ATP-dependent metallopeptidase FtsH/Yme1/Tma family protein	2441.25	1759
O	hslO	NWMN_0474	chaperonin HSP33	14846.5	6955		SA0470	Hsp33 family molecular chaperone HslO	337	192.5
E	cysK	NWMN_0475	cysteine synthase-like protein	5067	7795.5		SA0471	cysteine synthase A	891.5	1397.5
H	folP	NWMN_0476	dihydropteroate synthase	784.35	654.7		SA0472	dihydropteroate synthase	503.5	472
H	folB	NWMN_0477	dihydroneopterin aldolase	1319	584.5		SA0473	dihydroneopterin aldolase	653	603.5
H	folK	NWMN_0478	2-amino-4-hydroxy-6-hydroxymethyldihydropteridine pyrophosphokinase	1474	909.75		SA0474	2-amino-4-hydroxy-6- hydroxymethyldihydropteridine diphosphokinase	604.5	460.5
J	lysS	NWMN_0479	lysyl-tRNA synthetase	5636.07	4111.71		SA0475	lysine--tRNA ligase	1223	583.5
K	-	NWMN_0480	GntR family regulatory protein	200.736	192.983		SA0476	PLP-dependent aminotransferase family protein	-22.5	-43.5
H	pdxS	NWMN_0481	pyridoxine biosynthesis protein	3591	4446.5		SA0477	pyridoxal 5'-phosphate synthase lyase subunit PdxS	1135.5	1372.5
H	pdxT	NWMN_0482	glutamine amidotransferase subunit PdxT	343.75	770.95		SA0478	pyridoxal 5'-phosphate synthase glutaminase subunit PdxT	1472.5	1774
F	nupC	NWMN_0483	pyrimidine nucleoside transport protein	7212.5	4375		SA0479	NupC/NupG family nucleoside CNT transporter	500	383.5
K	ctsR	NWMN_0484	transcription repressor of class III stress genes	5011.64	2938.21		SA0480	CtsR family transcriptional regulator	2449.5	6636.5
S	cstR	NWMN_0485	UvrB/UvrC motif-containing protein	12383.5	6455.5		SA0481	excinuclease ABC subunit B	1416	2737
E	-	NWMN_0486	ATP:guanido phosphotransferase	7419.5	3924.5		SA0482	protein arginine kinase	806.5	1606.5
O	clpC	NWMN_0487	ATP-dependent Clp protease ATP-binding subunit ClpC	3764	3304		SA0483	ATP-dependent Clp protease ATP-binding subunit ClpC	885.75	2072.25
O	radA	NWMN_0488	DNA repair protein RadA	8827.5	6325		SA0484	DNA repair protein RadA	2282.5	2488
R	pilT	NWMN_0489	PIN/TRAM domain-containing protein	4670.5	3213.5		SA0485	PIN/TRAM domain-containing protein	898.5	1031.5
J	gltX	NWMN_0490	glutamyl-tRNA synthetase	11780.5	8228.29		SA0486	glutamate--tRNA ligase	4837.5	3991.5
E	cysE	NWMN_0491	serine acetyltransferase	18132	9794		SA0487	serine O-acetyltransferase	4088.5	3390.5
J	cysS	NWMN_0492	cysteinyl-tRNA synthetase	11060.5	6213.5		SA0488	cysteine--tRNA ligase	3867	3820
S	cysS	NWMN_0493	hypothetical protein	16882	9680		SA0489
J	yacO	NWMN_0494	hypothetical protein	12709.5	7681		SA0490
R	-	NWMN_0495	hypothetical protein	11340	7029.5		SA0491	NYN domain-containing protein	1764	1812.5
K	sigH	NWMN_0496	hypothetical protein	10148.5	6105.5		SA0492	RNA polymerase sigma factor	1112.5	878.5
U	secE	NWMN_0497	preprotein translocase subunit SecE	14846	9126.5		SA0493	preprotein translocase subunit SecE	12863.5	9984
K	nusG	NWMN_0498	transcription antitermination protein	19707	13378.5		SA0494	transcription termination/antitermination protein NusG	5773	4670.5
J	rplK	NWMN_0499	50S ribosomal protein L11	15058.5	11466		SA0495	50S ribosomal protein L11	38065	25937
J	rplA	NWMN_0500	50S ribosomal protein L1	3327.5	2587.5		SA0496	50S ribosomal protein L1	5192.5	3844
J	rplJ	NWMN_0501	50S ribosomal protein L10	4035	3637.5		SA0497	50S ribosomal protein L10	39573	46581
J	rplL	NWMN_0502	50S ribosomal protein L7/L12	895	775.65		SA0498	50S ribosomal protein L7/L12	9211	12968.5
J	-	NWMN_0503	hypothetical protein	2140	1391.25		SA0499	class I SAM-dependent methyltransferase	4231.5	4810
K	rpoB	NWMN_0504	DNA-directed RNA polymerase subunit beta	25961.4	17446.6		SA0500	DNA-directed RNA polymerase subunit beta	20902.5	23877.5
K	rpoC	NWMN_0505	DNA-directed RNA polymerase subunit beta	41357	26695.5		SA0501	DNA-directed RNA polymerase subunit beta'	10327.5	12806.2
J	rplL3	NWMN_0506	ribosomal protein L7Ae-like	40029.5	27363.5		SA0502	50S ribosomal protein L7ae-like protein	73752.5	56359.5
J	rpsL	NWMN_0507	30S ribosomal protein S12	33724.5	22718.5		SA0503	30S ribosomal protein S12	75135.5	56335
J	rpsG	NWMN_0508	30S ribosomal protein S7	31664.5	20699.5		SA0504	30S ribosomal protein S7	75158.5	56329
J	fus	NWMN_0509	elongation factor G	37015.8	25393.7		SA0505	elongation factor G	39091	40837
J	tuf	NWMN_0510	elongation factor Tu	53162.5	35406.5		SA0506	elongation factor Tu	16120.5	24862
R	-	NWMN_0511	M20/M25/M40 family peptidase	1982	1362		SA0507
H	kbl	NWMN_0512	2-amino-3-ketobutyrate coenzyme A ligase	16403.5	10685.5		SA0508	glycine C-acetyltransferase	1028.5	2096.5
R	hchA	NWMN_0513	chaperone protein HchA	28091	36302.5		SA0509	protein deglycase HchA	4022.5	3571
C	araB	NWMN_0514	ribulokinase	2780	2073.5		SA0510	ribulokinase	774.25	445.75
M	capD	NWMN_0515	L threonine 3 dehydrogenase	6036.75	5330.5		SA0511	NAD-dependent epimerase/dehydratase family protein	2369	4953
E	ilvE	NWMN_0516	branched-chain amino acid aminotransferase	14978.5	6645.31		SA0512	branched-chain amino acid aminotransferase	2394	2545.5
R	-	NWMN_0517	haloacid dehalogenase-like hydrolase	8298.5	5477		SA0513	HAD family hydrolase	624.5	697
F	dck	NWMN_0518	deoxynucleoside kinase	2768.5	1650		SA0514	deoxynucleoside kinase	108.5	27
F	dgk	NWMN_0519	deoxynucleoside kinase	1101.15	656.1		SA0515	deoxynucleoside kinase	-2	-30.5
F	tadA	NWMN_0520	hypothetical protein	2901	1710		SA0516	nucleoside deaminase	105.5	33.5
R	-	NWMN_0521	hydrolase haloacid dehalogenase-like	8070	4990.5		SA0517	Cof-type HAD-IIB family hydrolase	548.5	294.5
R	azr	NWMN_0522	hypothetical protein	1126.5	942.85		SA0518	FMN-dependent NADPH-azoreductase	88.5	85.5
M	sdrC	NWMN_0523	sdrC protein	127.35	88.305		SA0519	MSCRAMM family adhesin SdrC	-30	-15
M	sdrD	NWMN_0524	sdrD protein	1865.5	956.6		SA0520	MSCRAMM family adhesin SdrD	-48.5	1.5
	sdrE	NWMN_0525	Ser-Asp rich fibrinogen/bone sialoprotein-binding protein SdrE	2576.5	1509.05		SA0521	MSCRAMM family adhesin SdrE	-42	-29.5
M	-	NWMN_0526	glycosyl transferase group 1	1538	1128.5		SA0522
M	-	NWMN_0527	glycosyl transferase group 1	4681.57	3125.78		SA0523	glycosyltransferase	391.5	353.5
S	folE2	NWMN_0529	GTP cyclohydrolase	2778	1962		SA0524	GTP cyclohydrolase I FolE2	962	1037
S	bshB2	NWMN_0530	hypothetical protein	5969.5	2745		SA0525	bacillithiol biosynthesis deacetylase BshB2	798.5	872
	-	NWMN_0531	hypothetical protein	4473	2781		SA0526	DUF1806 family protein	1076	1093
G	nagB	NWMN_0532	glucosamine-6-phosphate isomerase	4924.5	3601.5		SA0527	glucosamine-6-phosphate deaminase	144	316
G	hxlA	NWMN_0533	hexulose-6-phosphate synthase	14790.5	18527		SA0528	3-hexulose-6-phosphate synthase	1678.5	1377.5
M	hxlB	NWMN_0534	SIS domain-containing protein	14914	17406		SA0529	6-phospho-3-hexuloisomerase	1264.5	1676
R	-	NWMN_0535	hydrolase haloacid dehalogenase-like	1040.55	527.85		SA0530	HAD family hydrolase	-9	-12.5
G	proP	NWMN_0536	proline/betaine transporter	785.05	983.1		SA0531	MFS transporter	591.5	197
	-	NWMN_0537	hypothetical protein	145.49	120.115		SA0532
I	vraA	NWMN_0538	long chain fatty acid CoA ligase vraA	198.3	100.465		SA0533	long-chain fatty acid--CoA ligase	149	-12
I	atoB2	NWMN_0539	acetyl-CoA acetyltransferase	1275	922.75		SA0534	thiolase family protein	-0.5	-8
J	vraC	NWMN_0540	hypothetical protein	1108	742.15		SA0535	protein VraC	45	168
	-	NWMN_0541	hypothetical protein	701.475	580.575		SA0536	hypothetical protein	-38.5	79.5
	vraX	NWMN_0542	hypothetical protein	8265.36	15849.3		SAS016
H	thiD1	NWMN_0543	phosphomethylpyrimidine kinase	3696	3136.5		SA0537	bifunctional hydroxymethylpyrimidine kinase/phosphomethylpyrimidine kinase	1178.5	1308
L	ung	NWMN_0544	uracil-DNA glycosylase	2879.5	2146.5		SA0538	uracil-DNA glycosylase	548.5	282
	-	NWMN_0545	hypothetical protein	3077.14	2379.93		SA0539	hypothetical protein	651.5	416.5
S	-	NWMN_0546	hypothetical protein	301	264.55		SA0540	DUF423 domain-containing protein	440.5	470.5
E	-	NWMN_0547	amino acid permease	1558.5	1440.45		SA0541	APC family permease	1344	919
S	-	NWMN_0548	hypothetical protein	4861	3974.5		SA0542	threonine/serine exporter family protein	507	511
S	-	NWMN_0549	hypothetical protein	4102	2812.5		SA0543	threonine/serine exporter ThrE family protein	328	303
S	ywfI	NWMN_0550	heme peroxidase	4788.5	3910.5
C	eutD	NWMN_0551	phosphotransacetylase	6670.36	6664.64		SA0545	phosphate acetyltransferase	2491.5	5911
H	lplA2	NWMN_0552	lipoate-protein ligase A	7176.5	6875		SA0546	lipoate--protein ligase family protein	3266.5	8439.5
I	mvaK1	NWMN_0553	mevalonate kinase	3669	3039.5		SA0547	mevalonate kinase	776.5	753.5
I	mvaD	NWMN_0554	mevalonate diphosphate decarboxylase	2566	2555.45		SA0548	diphosphomevalonate decarboxylase	1449	1742
I	mvaK2	NWMN_0555	phosphomevalonate kinase	4245.5	4818.5		SA0549	phosphomevalonate kinase	767	784.5
	ywzC	NWMN_0556	hypothetical protein	434.1	419.05		SA0550	DUF1450 domain-containing protein	-13.5	-28.5
C	merA	NWMN_0557	pyridine nucleotide-disulfide oxidoreductase	810.85	314.33		SA0551
K	-	NWMN_0558	hypothetical protein	882.5	521.7		SA0552	Rrf2 family transcriptional regulator	-13.5	-16.5
L	-	NWMN_0559	hypothetical protein	4132	3108.5		SA0553	transposase	669	533.5
	-	NWMN_0561	hypothetical protein	4561.5	3214
	-	NWMN_0562	hypothetical protein	3252.5	1203.05
	-	NWMN_0563	hypothetical protein	3318.75	2408
	-	NWMN_0565	hypothetical protein	1853	1535		SA0554	DUF443 domain-containing protein	10	-9.5
	-	NWMN_0566	hypothetical protein	1293.5	1026.5
	-	NWMN_0567	hypothetical protein	1166.2	547.25
	-	NWMN_0568	hypothetical protein	1951.5	1336		SA0556	DUF443 family protein	-92.5	-98.5
	-	NWMN_0570	hypothetical protein	2229.5	1345.5
	-	NWMN_0571	hypothetical protein	2022	1382.5
C	iolS	NWMN_0572	aldo/keto reductase	2438	1584.5		SA0557	aldo/keto reductase	495.5	853
R	ywqN	NWMN_0573	hypothetical protein	4813.5	3335.5		SA0558	flavodoxin family protein	562	863.5
K	-	NWMN_0574	acetyltransferase GNAT	11793.5	6699		SA0559	GNAT family N-acetyltransferase	402.5	373.5
R	-	NWMN_0575	HD domain-containing protein	15557	10649		SA0560	HD domain-containing protein	496	582.5
	-	NWMN_0576	hypothetical protein	5107	4205.5		SA0561	hypothetical protein	12	28.5
R	adh1	NWMN_0577	alcohol dehydrogenase	2913	2959.5		SA0562	alcohol dehydrogenase AdhP	1353	505.5
S	-	NWMN_0578	hypothetical protein	13490.5	6162		SA0563	DUF1934 family protein	382.5	312.5
J	argS	NWMN_0579	arginyl-tRNA synthetase	6797.75	4471.85		SA0564	arginine--tRNA ligase	1157	563.5
L	-	NWMN_0580	endonuclease III	289.05	150.15		SA0565	endonuclease III domain-containing protein	29	16.5
P	btuF	NWMN_0581	iron compound ABC transporter substrate-binding protein	3164.5	1977		SA0566	ABC transporter substrate-binding protein	2009.5	179
P	fecD	NWMN_0582	iron compound ABC transporter permease protein	4478.5	2618		SA0567	iron ABC transporter permease	886	38.5
R	-	NWMN_0583	haloacid dehalogenase-like hydrolase	5144	3868		SA0568	HAD family hydrolase	266	307.5
R	-	NWMN_0584	hydrolase	4415.5	3277.5		SA0569	alpha/beta hydrolase	821	744.5
	-	NWMN_0585	hypothetical protein	9207	14226		SA0570	hypothetical protein	1667.5	3099
	-	NWMN_0586	hypothetical protein	10768.5	7458.75		SA0571	hypothetical protein	663	842
R	-	NWMN_0587	alpha/beta fold family hydrolase	11351	9763.5		SA0572	alpha/beta hydrolase	-26.5	23
K	sarA	NWMN_0588	staphylococcal accessory regulator A	2190.5	2812.5		SA0573	transcriptional regulator	219	187
S	-	NWMN_0590	hypothetical protein	1847.5	974.55		SA0574	DMT family transporter	-7	-18
	-	NWMN_0591	hypothetical protein	325.425	252.275		SA0575	DUF2922 domain-containing protein	-70	-66
L	-	NWMN_0592	integrase/recombinase	5946	6271		SA0577	recombinase	413.5	337
C	mnhA	NWMN_0593	monovalent cation/H+ antiporter subunit A	4332.5	4549		SA0578	DUF4040 family protein	418	411.25
P	mnhB	NWMN_0594	monovalent cation/H+ antiporter subunit B	5557	4667.5		SA0579	monovalent cation/H+ antiporter subunit B	375	321
P	mnhC	NWMN_0595	monovalent cation/H+ antiporter subunit C	6093.5	4895.5		SA0580	cation:proton antiporter	473	398
C	mnhD	NWMN_0596	CPA3 family monovalent cation (K+ or Na+):proton (H+) antiporter-3, MnhD subunit (mnhD1)	5313.5	4506.5		SA0581	Na+/H+ antiporter subunit D	758.25	626
P	mnhE	NWMN_0597	monovalent cation/H+ antiporter subunit E	6060	4613		SA0582
P	mnhF	NWMN_0598	monovalent cation/H+ antiporter subunit F	6151.5	4887.5		SA0583	cation:proton antiporter	1683	1143.5
P	mnhG	NWMN_0599	monovalent cation/H+ antiporter subunit G	1394.9	1165.03		SA0584	Na+/H+ antiporter subunit G	382.5	308
P	-	NWMN_0600	Na+/H+ antiporter	6839.5	3104.5		SA0585	sodium:proton antiporter	877.75	1028.5
P	sitA	NWMN_0601	iron repressed lipoprotein MntC (ABC transporter substrate-binding protein)	65175.1	65168.1		SA0587	metal ABC transporter substrate-binding protein	6025.5	7493
P	mntB	NWMN_0602	iron (chelated) ABC transporter permease protein	65173.5	65174		SA0588	metal ABC transporter permease	3617.5	4123
P	mntA	NWMN_0603	cation ABC transporter ATP-binding protein MntA	65175.2	65171.6		SA0589	metal ABC transporter ATP-binding protein	4717.5	5013
K	sirR	NWMN_0604	iron dependent repressor	8044.5	4467		SA0590	metal-dependent transcriptional regulator	59	28
	-	NWMN_0605	hypothetical protein	438.2	370		SA0591	M50 family metallopeptidase	-1	55
M	tagA	NWMN_0606	teichoic acid biosynthesis protein	3062.57	2158		SA0592	WecB/TagA/CpsF family glycosyltransferase	72.5	3.5
G	tagH	NWMN_0607	teichoic acids export protein ATP-binding subunit	10549	6594.29		SA0593	teichoic acids export ABC transporter ATP-binding subunit TagH	584	559
G	tagG	NWMN_0608	teichoic acid biosynthesis protein	1770	1748.5		SA0594	teichoic acids export ABC transporter permease subunit TagG	272.5	261.5
M	tagB	NWMN_0609	tagB protein	4688.5	2125.5
M	tagX	NWMN_0610	tagX protein	7509	4801		SA0596	glycosyltransferase family 2 protein	1072.5	1327.5
M	tagD	NWMN_0611	glycerol-3-phosphate cytidylyltransferase	3434	2593.5		SA0597	glycerol-3-phosphate cytidylyltransferase	752.5	953
M	pbp4	NWMN_0612	penicillin-binding protein 4	1678.41	1097.97		SA0598	D-alanyl-D-alanine carboxypeptidase	273.75	173.25
V	abcA	NWMN_0613	ABC transporter ATP-binding protein	27222.5	27916		SA0599	ABC transporter ATP-binding protein	2952.75	8089.25
F	nupC2	NWMN_0614	nucleoside permease NupC	3156	2360.5		SA0600	nucleoside permease	547	491.5
S	-	NWMN_0615	hypothetical protein	7184	5506		SA0601		226.5	353.5
P	fhuA	NWMN_0616	iron compound ABC transporter ATP-binding protein	3175.5	2294.5		SA0602	ABC transporter ATP-binding protein	714.5	813
P	fhuB	NWMN_0617	ferrichrome transport permease fhuB	837.65	585.55		SA0603	iron ABC transporter permease	1221.5	522
P	fhuG	NWMN_0618	ferrichrome ABC transporter (permease)	1135.4	893.1		SA0604	iron ABC transporter permease	862.5	1016
G	dhaK	NWMN_0619	dihydroxyacetone kinase	10213.6	6399.29		SA0605	dihydroxyacetone kinase subunit DhaK	1539.5	786
G	dhaL	NWMN_0620	DAK2 domain-containing protein	10684	7001.5		SA0606	dihydroxyacetone kinase subunit L	249	1329.5
S	dhaM	NWMN_0621	hypothetical protein	6717	4912.5		SA0607	PTS-dependent dihydroxyacetone kinase phosphotransferase subunit DhaM	153	941
	-	NWMN_0622	hypothetical protein	5134.5	3323		SA0608	hypothetical protein	1240	2437.5
S	-	NWMN_0623	hypothetical protein	2581	2149.5		SA0609	membrane protein	2536.5	1565
I	lipA	NWMN_0624	lipase/esterase LipA	1341.5	761.45		SA0610	alpha/beta hydrolase	0.5	-27.75
	-	NWMN_0625	hypothetical protein	1636.5	1051.35		SA0611	hypothetical protein	-50.5	-54
K	-	NWMN_0626	acetyltransferase	4122	2568		SA0612	GNAT family N-acetyltransferase	266.5	266.5
M	-	NWMN_0627	hypothetical protein	4214.5	2672		SA0613	NAD(P)-dependent oxidoreductase	324	154.5
T	graR	NWMN_0628	hypothetical protein	2821.5	1971.5		SA0614	response regulator transcription factor	314	229.5
T	graS	NWMN_0629	sensor histidine kinase	1960	1344		SA0615	sensor histidine kinase	212	255
V	vraF	NWMN_0630	ABC transporter ATP-binding protein	5675.5	2948.5		SA0616	ABC transporter ATP-binding protein	934	540
V	vraG	NWMN_0631	ABC transporter permease	6782	3213		SA0617	FtsX-like permease family protein	2091.75	1040.75
P	-	NWMN_0632	hypothetical protein	4930	3680		SA0618	DUF47 domain-containing protein	1100.5	1229
P	pitA	NWMN_0633	phosphate transporter	3715.5	3071		SA0619	inorganic phosphate transporter	408	538.5
M	ssaA	NWMN_0634	secretory antigen SsaA-like protein	7317.5	4948		SA0620	LysM peptidoglycan-binding domain-containing protein	1067	661
R	-	NWMN_0635	membrane protein interacting with FtsH	2788.5	2054		SA0621	hypothetical protein	-29	27.5
K	-	NWMN_0636	AraC family transcription regulator	827.329	430.464		SA0622	helix-turn-helix transcriptional regulator	568.25	507.25
K	sarX	NWMN_0637	hypothetical protein	145.15	107.045		SA0623	MarR family transcriptional regulator	110.5	-10.5
S	yeeN	NWMN_0638	hypothetical protein	5408.5	4449		SA0624
S	-	NWMN_0639	hypothetical protein	1566.5	1482.33
S	-	NWMN_0640	hypothetical protein	17309.5	10154.5		SA0626	DUF402 domain-containing protein	721.5	852.5
K	lysR	NWMN_0641	LysR family transcriptional regulator	8280.5	4900		SA0627		972	1048
G	-	NWMN_0642	major facilitator super superfamily	2785	1856.5		SA0628	MFS transporter	437	550
S	-	NWMN_0643	hypothetical protein	1211.5	895.45		SA0629	DUF456 domain-containing protein	268	472
	-	NWMN_0644	hypothetical protein	3042.5	1879		SA0630	hypothetical protein	951	75
K	-	NWMN_0645	hypothetical protein	812.55	507.45		SA0631	GNAT family N-acetyltransferase	-14.5	-2.5
	-	NWMN_0646	hypothetical protein	3459.5	2040.5		SA0632	hypothetical protein	-3	0.5
	-	NWMN_0647	hypothetical protein	4852.5	4740.5		SA0633
J	rimL	NWMN_0648	acetyltransferase	1880	1081.75		SA0634	GNAT family N-acetyltransferase	412	451.5
R	yvdD	NWMN_0649	hypothetical protein	3739.5	4441.5		SA0635	TIGR00730 family Rossman fold protein	344	634.5
S	-	NWMN_0650	hypothetical protein	6389	6704		SA0636	YaiI/YqxD family protein	607.5	880
	-	NWMN_0651	hypothetical protein	17266.5	13762		SA0637	hypothetical protein	1027	1250.5
V	uppP	NWMN_0652	undecaprenyl pyrophosphate phosphatase	2386.07	2326.36		SA0638	undecaprenyl-diphosphate phosphatase	72	45
C	graA	NWMN_0653	ABC transporter ATP-binding MsbA	3625.5	2614.5		SA0639	ABC transporter ATP-binding protein/permease	1863	1623.5
C	cydC	NWMN_0654	ABC transporter ATP-binding MsbA	2396.5	1974		SA0640	amino acid ABC transporter ATP-binding/permease protein	750.25	697.25
K	mgrA	NWMN_0655	MarR family regulatory protein	2020.5	3999		SA0641	MarR family transcriptional regulator	1940	2222.5
R	cobW2	NWMN_0656	cobalamin synthesis protein P47K	1750	1340.75		SA0642	GTP-binding protein	219.5	56
R	-	NWMN_0657	oxidoreductase	5101.5	3798		SA0643	aldo/keto reductase family oxidoreductase	284.5	119
	-	NWMN_0658	hypothetical protein	3645	1866.3		SA0644	hypothetical protein	830.5	635.5
P	-	NWMN_0659	anion transporter	3254.5	2252.5		SA0645	DASS family sodium-coupled anion symporter	1384.75	2069.5
L	phrB	NWMN_0660	hypothetical protein	3233	3028		SA0646	deoxyribodipyrimidine photo-lyase	154.5	152
	-	NWMN_0661	hypothetical protein	664.05	449.3		SA0647	hypothetical protein	51	75
S	-	NWMN_0662	hypothetical protein	3114.93	2365.57		SA0648	DUF1361 domain-containing protein	87.5	134
R	-	NWMN_0663	hypothetical protein	2419.5	1724.57		SA0649	DNA-binding protein	180	281
G	norA	NWMN_0664	quinolone resistance norA protein	10682.5	8508		SA0650	multidrug efflux MFS transporter NorA	396.5	472.5
	-	NWMN_0665	hypothetical protein	4411.33	3350.67		SA0651	hypothetical protein	28	-33
S	ybaK	NWMN_0666	ebsC protein	2523.5	1452.15		SA0652	Cys-tRNA(Pro) deacylase	393	763.5
K	deoR	NWMN_0667	fructose operon transcriptional repressor	3481.29	2063.14		SA0653	DeoR/GlpR transcriptional regulator	552	1014.5
G	fruB	NWMN_0668	fructose 1-phosphate kinase	4424.5	2754		SA0654	1-phosphofructokinase	397.5	362
G	fruA	NWMN_0669	fructose specific permease	3400.5	2627.5		SA0655	PTS fructose transporter subunit IIC	567.25	655.25
G	nagA	NWMN_0670	N-acetylglucosamine-6-phosphate deacetylase	2254	1655.5		SA0656	N-acetylglucosamine-6-phosphate deacetylase	374	221
R	-	NWMN_0671	hemolysin	6165.5	5029		SA0657	HlyC/CorC family transporter	299.5	228.5
R	yvgN	NWMN_0672	aldo/keto reductase	23258	19493		SA0658	aldo/keto reductase	355.5	450
M	csbB	NWMN_0673	glycosyl transferase group 2	9927.5	9840.5		SA0659	glycosyltransferase family 2 protein	203	268.5
T	saeS	NWMN_0674	sensor histidine kinase SaeS	65173.5	64326.5		SA0660	HAMP domain-containing histidine kinase	1426	1557.5
T	saeR	NWMN_0675	response regulator	60397.5	43639.5		SA0661	response regulator transcription factor	1819	1775
S	saeQ	NWMN_0676	hypothetical protein	62512	49120
	saeP	NWMN_0677	hypothetical protein	19399.5	23216		SA0663	DM13 domain-containing protein	1338	1423.5
	-	NWMN_0678	hypothetical protein	2810.5	2445		SA0664	hypothetical protein	185.5	100
O	queE	NWMN_0679	radical activating enzyme	4820.5	3820		SA0665	7-carboxy-7-deazaguanine synthase QueE	287	176.5
H	queD	NWMN_0680	6-pyruvoyl tetrahydropterin synthase (queuosine biosynthesis)	2908	2065.5		SA0666	6-carboxytetrahydropterin synthase QueD	989.5	713
R	queC	NWMN_0681	7-cyano-7-deazaguanine synthase (queuosine biosynthesis)	2820.5	1436.65		SA0667	7-cyano-7-deazaguanine synthase QueC	282.5	97
E	pabA	NWMN_0682	para-aminobenzoate synthase glutamine amidotransferase component II	5029	3635.5		SA0668	aminodeoxychorismate/anthranilate synthase component II	224	172
E	pabB	NWMN_0683	anthranilate/para-aminobenzoate synthase component I	16586	10963.5		SA0669	anthranilate synthase component I family protein	741.5	633.5
E	pabC	NWMN_0684	chorismate binding enzyme	19225.5	12657.5		SA0670	aminodeoxychorismate lyase	593	421
E	-	NWMN_0685	hypothetical protein	8419	5936.5		SA0672	allophanate hydrolase subunit 1	513.5	523
E	-	NWMN_0686	hypothetical protein	15348.5	5819		SA0673	biotin-dependent carboxyltransferase family protein	1766	1349
M	ltaS	NWMN_0687	sulfatase	24698	19540		SA0674	LTA synthase family protein	1548.5	1524.5
R	-	NWMN_0688	ABC transporter ATP-binding protein	5471	3197.25		SA0675	ABC-F family ATP-binding cassette domain-containing protein	1477.25	1030.75
L	recQ	NWMN_0689	ATP-dependent DNA helicase RecQ	6480.5	3881.5		SA0676	DNA helicase RecQ	786	593.25
E	-	NWMN_0690	ABC transporter	7037	5344		SA0677	ABC transporter ATP-binding protein	53	30
E	opuBB	NWMN_0691	amino acid ABC transporter permease protein	7258	5623.5		SA0678	ABC transporter permease/substrate-binding protein	502.25	606.75
E	hisC	NWMN_0692	histidinol-phosphate aminotransferase HisC1	1462.5	867.3		SA0679	histidinol-phosphate transaminase	217.5	230
S	-	NWMN_0693	hypothetical protein	1305.5	1061.9		SA0680	5'-3'-deoxyribonucleotidase	187	140
I	dgkA1	NWMN_0695	hypothetical protein	7993.5	6878.15		SA0681	lipid kinase	-3	56.5
E	yjdL	NWMN_0696	di-/tripeptide ABC transporter	4949.93	4642.07		SA0682	peptide MFS transporter	1129	1619.25
R	folE	NWMN_0697	7-cyano-7-deazaguanine reductase	921.85	842.85		SA0683	NADPH-dependent 7-cyano-7-deazaguanine reductase QueF	394.5	306
G	-	NWMN_0698	integral membrane domain-containing protein	1693	859.4		SA0684	DMT family transporter	333.5	388
F	nrdI	NWMN_0699	ribonucleotide reductase stimulatory protein	59159.5	40435		SA0685	class Ib ribonucleoside-diphosphate reductase assembly flavoprotein NrdI	4592	4745.5
F	nrdE	NWMN_0700	ribonucleotide-diphosphate reductase subunit alpha	48871	35808.5		SA0686	class 1b ribonucleoside-diphosphate reductase subunit alpha	3262	2268.5
F	nrdF	NWMN_0701	ribonucleotide-diphosphate reductase subunit beta	24328.6	21151.1		SA0687	class 1b ribonucleoside-diphosphate reductase subunit beta	548	356
P	sstA	NWMN_0702	ferrichrome ABC transporter permease	313.45	239.35		SA0688	ABC transporter permease	-3.5	-50.5
P	sstB	NWMN_0703	iron compound ABC transporter permease protein	155.9	86.205		SA0689	iron ABC transporter permease	-40.5	-10.5
P	sstC	NWMN_0704	ABC transporter ATP-binding protein	356.55	266		SA0690	ABC transporter ATP-binding protein	498.5	283
P	sstD	NWMN_0705	ferrichrome ABC transporter lipoprotein	560.2	358.75		SA0691	siderophore ABC transporter substrate-binding protein	50	132
S	-	NWMN_0706	hypothetical protein	6037	3962		SA0692	hypothetical protein	1027.5	1255.5
M	murB	NWMN_0707	UDP-N-acetylenolpyruvoylglucosamine reductase	4124.43	2587.64		SA0693	UDP-N-acetylenolpyruvoylglucosamine reductase	338	353
S	-	NWMN_0708	hypothetical protein	535.25	376.4		SA0694	GrpB family protein	60	53
	-	NWMN_0709	hypothetical protein	2587.5	2501.5		SA0695	EMYY motif lipoprotein	210.5	164.5
	-	NWMN_0710	hypothetical protein	5205.5	4045.5		SA0696	bacillithiol system redox-active protein YtxJ	132.5	219.5
G	-	NWMN_0711	glycerate kinase	2028	1853		SA0697	glycerate kinase	591.5	802.5
E	pepT	NWMN_0712	peptidase T	6290.5	4128		SA0698	peptidase T	2961.5	3844.5
S	-	NWMN_0713	hypothetical protein	1623.5	1046.7		SA0699	threonine/serine exporter family protein	363	512
S	-	NWMN_0714	hypothetical protein	776.286	454.829		SA0700	threonine/serine exporter ThrE family protein	287.5	328.5
T	-	NWMN_0715	GGDEF domain-containing protein	1897.5	1489.5		SA0701	GGDEF domain-containing protein	766.5	583.5
M	llm	NWMN_0716	phospho-N-acetylmuramoyl-pentapeptide-transferase	4973.5	2922.5		SA0702	undecaprenyl/decaprenyl-phosphate alpha-N-acetylglucosaminyl 1-phosphate transferase	2500	2140.5
S	-	NWMN_0717	hypothetical protein	2884	1713.5		SA0703	YigZ family protein	106.5	82
S	-	NWMN_0718	degV	2754.07	2337.56		SA0704	DegV family protein	19.5	-1
L	comFA	NWMN_0719	comf operon protein 1	244.793	339.039		SA0705	comf operon protein 1	-47.5	-79.5
R	comFC	NWMN_0720	hypothetical protein	632.9	363.15		SA0706	ComF family protein	4.5	-24.5
J	raiA	NWMN_0721	sigma 54 modulation protein	30666.5	29409		SA0707	ribosome-associated translation inhibitor RaiA	5008.5	11857.5
U	secA	NWMN_0722	preprotein translocase subunit SecA	6990.64	4492.71		SA0708	preprotein translocase subunit SecA	1892	2315.5
J	prfB	NWMN_0723	peptide chain release factor 2	3662.93	1290.24		SA0709	peptide chain release factor 2	1098.5	1074.5
M	lysM	NWMN_0724	secretory antigen SsaA-like protein	153.2	101.655		SA0710	CHAP domain-containing protein	-38.5	-58
R	yfbR	NWMN_0725	hypothetical protein	3586.5	2304.5		SA0711	HD domain-containing protein	-20.5	-27
L	uvrB	NWMN_0726	excinuclease ABC subunit B	4205.5	2660		SA0713	excinuclease ABC subunit UvrB	1553	1545.25
L	uvrA	NWMN_0727	excinuclease ABC subunit A	8535.5	6249.5		SA0714	excinuclease ABC subunit UvrA	266.5	303
T	hprK	NWMN_0728	HPr kinase/phosphorylase	9329	5462		SA0715	HPr kinase/phosphorylase	2366	2369.5
M	lgt	NWMN_0729	prolipoprotein diacylglyceryl transferase	11431.5	6316.5		SA0716	prolipoprotein diacylglyceryl transferase	322.5	282.5
R	maa	NWMN_0730	acetyltransferase	4748.5	3359		SA0717	acetyltransferase	1109	1087.5
R	-	NWMN_0731	TPR domain-containing protein	6674	4180		SA0718	tetratricopeptide repeat protein	3786.5	3772.5
O	trxB	NWMN_0732	thioredoxin reductase	25366	14469		SA0719	thioredoxin-disulfide reductase	2002	3527.5
R	-	NWMN_0733	hypothetical protein	64877.5	60134.5		SA0720	RNase adapter RapZ	1204	1506
S	-	NWMN_0734	hypothetical protein	36085.5	35327.5		SA0721	YvcK family protein	588.5	809
S	whiA	NWMN_0735	hypothetical protein	18926	19493.5		SA0722	DNA-binding protein WhiA	376	390.5
O	clpP	NWMN_0736	ATP-dependent Clp protease proteolytic subunit ClpP	3218	3339.5		SA0723	ATP-dependent Clp protease proteolytic subunit	375.5	786.5
R	-	NWMN_0737	hypothetical protein	13332	12198		SA0724	TIGR01777 family protein	1203	144.5
	-	NWMN_0738	hypothetical protein	58997.5	42636		SA0725	DUF4887 domain-containing protein	713.5	386
K	gapR	NWMN_0740	glycolytic operon regulator	17074	14279.5		SA0726	sugar-binding transcriptional regulator	7692	8029.5
G	gap	NWMN_0741	glyceraldehyde-3-phosphate dehydrogenase type I	27314.5	21390		SA0727	type I glyceraldehyde-3-phosphate dehydrogenase	7764.5	5246
G	pgk	NWMN_0742	phosphoglycerate kinase	42163.5	13045		SA0728	phosphoglycerate kinase	6362.5	4306
G	tpiA	NWMN_0743	triosephosphate isomerase	38027.5	28553.5		SA0729	triose-phosphate isomerase	10097.5	6246.5
G	pgm	NWMN_0744	phosphoglyceromutase	46078.5	17129		SA0730	2,3-bisphosphoglycerate-independent phosphoglycerate mutase	18151.2	10108
G	eno	NWMN_0745	enolase	19882.5	18737		SA0731	phosphopyruvate hydratase	6934.5	11782.5
	-	NWMN_0746	hypothetical protein	7802.5	6723		SA0732	hypothetical protein	1287.5	1407
U	secG	NWMN_0747	preprotein translocase subunit SecG	17916	15983		SA0733	preprotein translocase subunit SecG	2602	1326
R	est	NWMN_0748	carboxylesterase	6181	3504.5		SA0734	carboxylesterase	5239.5	2901
K	rnr	NWMN_0749	ribonuclease R	7874	7014		SA0735	ribonuclease R	2374.75	1918
O	smpB	NWMN_0750	SsrA-binding protein	6238	6069		SA0736	SsrA-binding protein SmpB	1456	1285.5
	-	NWMN_0751	hypothetical protein	432.85	299.6
	-	NWMN_0752	hypothetical protein	2598.25	2643		SA0738	hypothetical protein	387.5	350
	-	NWMN_0753	hypothetical protein	14173.5	11237		SA0739	DUF5067 domain-containing protein	363	468
	-	NWMN_0754	hypothetical protein	11301	6329		SA0740
R	-	NWMN_0755	acetyltransferase	5872.5	3600.5		SA0741	N-acetyltransferase	176	213.5
M	clfA	NWMN_0756	clumping factor	27341	28713		SA0742	MSCRAMM family adhesin clumping factor ClfA	6261	3446.5
	graB	NWMN_0757	secreted von Willebrand factor-binding protein VWbp	154.593	136.106		SA0743	von Willebrand factor binding protein Vwb	15.75	21
	ssp	NWMN_0758	extracellular matrix and plasma binding protein	1805	1120.9		SA0744	extracellular matrix protein-binding adhesin Emp	-49.5	-70.5
	vwb	NWMN_0759	extracellular matrix and plasma binding like	1186.1	396.6		SA0745	hypothetical protein	32	-78
L	nuc	NWMN_0760	staphylococcal nuclease	22587	22023		SA0746	thermonuclease family protein	178.5	92
K	cspC	NWMN_0761	cold-shock protein CSD	4168.5	4551		SA0747	cold-shock protein	775	593
	-	NWMN_0762	hypothetical protein	2213.71	2106.29		SA0748
	-	NWMN_0763	hypothetical protein	2048.5	2088		SA0749
	-	NWMN_0764	hypothetical protein	897.55	565.6		SA0750	hypothetical protein	-16	-24.5
	-	NWMN_0765	hypothetical protein	631.35	435.2		SAS018
	-	NWMN_0766	hypothetical protein	6613	3709		SA0751
G	gpmA1	NWMN_0768	phosphoglycerate mutase	189.95	226.55		SAS020	histidine phosphatase family protein	262.5	343
R	-	NWMN_0769	LysE/YggA	6576.5	5859		SA0753	amino acid transporter	264.5	129
K	-	NWMN_0770	hypothetical protein	23627	15339		SA0754	GNAT family N-acetyltransferase	-22	35
O	osmC	NWMN_0771	OsmC-like protein	3604.5	4594.5		SA0755	organic hydroperoxide resistance protein	-61.5	-53.5
E	aroD	NWMN_0772	3-dehydroquinate dehydratase	1796.5	1229.5		SA0756	type I 3-dehydroquinate dehydratase	70	183.5
C	-	NWMN_0773	nitroreductase	4716.5	3233.5		SA0757	nitroreductase	168	283
O	-	NWMN_0774	thioredoxin	5384.5	3400.5		SA0758	thioredoxin family protein	250	419.5
P	arsC1	NWMN_0775	hypothetical protein	17576.5	14757		SA0759	arsenate reductase family protein	1229	2226
E	gcvH	NWMN_0776	glycine cleavage system protein H	4869	5127		SA0760	glycine cleavage system protein GcvH	2447.5	3080.5
S	truncated-SA	NWMN_0777	hypothetical protein	1572	878.8		SA0761	DUF1963 domain-containing protein	1415.5	112.5
L	-	NWMN_0778	hypothetical protein	4410	5903.5		SA0768	topiosmerase	16	109.5
O	-	NWMN_0779	hypothetical protein	3623.5	3972.5		SAS023	thioredoxin family protein	379.5	533
P	metN2	NWMN_0780	ABC transporter ATP-binding protein	5284.5	3139.5		SA0769	methionine ABC transporter ATP-binding protein	1076.5	1577
P	metI	NWMN_0781	ABC transporter permease protein	9189.5	5378		SA0770	ABC transporter permease	620	885.5
P	metQ	NWMN_0782	ABC transporter substrate-binding protein	6053.5	3686.24		SA0771	MetQ/NlpA family ABC transporter substrate-binding protein	248.5	273.5
S	-	NWMN_0784	hypothetical protein	2022.75	1295.47		SA0773	DUF368 domain-containing protein	283.5	276.5
O	sufC	NWMN_0785	ABC transporter ATP-binding protein	32884	31096.5		SA0774	Fe-S cluster assembly ATPase SufC	3978	3292.5
O	sufD	NWMN_0786	FeS assembly protein SufD	31994.9	25291.1		SA0775	Fe-S cluster assembly protein SufD	12778	12771
E	nifS	NWMN_0787	aminotransferase	12153.9	10920.6		SA0776	cysteine desulfurase	4603	5058.5
C	nifU	NWMN_0788	nitrogen fixation protein NifU-like protein	22260.5	18993.5		SA0777	SUF system NifU family Fe-S cluster assembly protein	7757	9168.5
O	sufB	NWMN_0789	FeS assembly protein SufB	21400.8	12233		SA0778	Fe-S cluster assembly protein SufB	764.5	1099
	-	NWMN_0790	hypothetical protein	554.4	612.4		SA0779	hypothetical protein	-35.5	-51.5
P	-	NWMN_0791	CBS domain-containing protein	17460.6	11486.9		SA0780	HlyC/CorC family transporter	140	155.5
R	fabK	NWMN_0792	hypothetical protein	12624.5	9095.5		SA0781	nitronate monooxygenase	191.5	128.5
S	-	NWMN_0793	hypothetical protein	2219.5	1453.5		SA0782	DUF72 domain-containing protein	767	643.5
R	-	NWMN_0794	hypothetical protein	1631	1267.2		SA0783	sulfite exporter TauE/SafE family protein	541	614.5
F	-	NWMN_0795	5-nucleotidase	2540	1774		SA0784	bifunctional metallophosphatase/5'-nucleotidase	1158	1623
H	lipA	NWMN_0796	lipoyl synthase	4897.5	4439		SA0785	lipoyl synthase	970.5	514.5
S	-	NWMN_0797	hypothetical protein	657.35	528.25		SA0786	DUF1027 domain-containing protein	-9.5	3.5
	-	NWMN_0798	hypothetical protein	863.575	596.325		SA0788	DUF3055 domain-containing protein	-15.5	5.5
S	-	NWMN_0799	hypothetical protein	8345	6179.8		SA0789	DUF86 domain-containing protein	1438.5	980.5
G	pdxp	NWMN_0800	hydrolase	12118	9014.5		SA0790	TIGR01457 family HAD-type hydrolase	3088.5	2868
C	ghrB	NWMN_0801	D-isomer specific 2-hydroxyacid dehydrogenase NAD binding domain-containing protein	3371.79	2077.5		SA0791	D-glycerate dehydrogenase	9454.5	11861
	dltX	NWMN_0802	hypothetical protein	29613	12804.5		SA0792
Q	dltA	NWMN_0803	D-alanine--D-alanyl carrier protein ligase	20094.9	10934		SA0793	D-alanine--poly(phosphoribitol) ligase subunit DltA	12957	7348.5
M	dltB	NWMN_0804	dltB protein	19250	10700.5		SA0794	PG:teichoic acid D-alanyltransferase DltB	3871	2893
I	dltC	NWMN_0805	D-alanine--poly(phosphoribitol) ligase subunit 2	22278.5	11317		SA0795
M	dltD	NWMN_0806	poly D-alanine transfer protein	12158.5	6199.33		SA0796	D-alanyl-lipoteichoic acid biosynthesis protein DltD	7286.25	5647.75
O	nifU	NWMN_0807	NifU domain-containing protein	2860.5	2616		SA0797	NifU family protein	151	218.5
S	yuzD	NWMN_0808	hypothetical protein	956.4	970		SA0798	DUF1462 family protein	58	68
C	ndh2	NWMN_0809	hypothetical protein	4798.36	4228.86		SA0799	NAD(P)/FAD-dependent oxidoreductase	627.5	1161
S	-	NWMN_0810	hypothetical protein	4402.5	3260.5		SA0800	DUF1450 domain-containing protein	139.5	210
C	ndh	NWMN_0811	NADH dehydrogenase	11428	10888.5		SA0802	NADH dehydrogenase	2908	4052.5
E	ampA	NWMN_0812	cytosol aminopeptidase	1618	1241		SA0803	cytosol aminopeptidase	169	266
R	yuiF	NWMN_0813	NhaC family sodium:proton (Na+:H+) antiporter	1506.5	927.7		SA0804	Na+/H+ antiporter family protein	134.5	82.5
Q	-	NWMN_0814	two-component response regulator/competence factor transporting ATP-binding/permease protein	2156	1156.3		SA0805	PaaI family thioesterase	77.5	171.5
P	-	NWMN_0815	hypothetical protein	201.65	103.745		SA0806	pyridine nucleotide-disulfide oxidoreductase	-40	-22.5
P	mnhG	NWMN_0816	CPA3 family monovalent cation:proton (H+) antiporter-3 subunit G (mnhG2)	4225	3822		SA0807	Na+/H+ antiporter subunit G1	38	156.5
P	mnhF	NWMN_0817	CPA3 family monovalent cation:proton (H+) antiporter-3 subunit F (mnhF2)	2183	2193		SA0808	Na(+)/H(+) antiporter subunit F1	363	636.5
P	mnhE	NWMN_0818	monovalent cation/H+ antiporter subunit E	8596	6976		SA0809
C	mnhD	NWMN_0819	CPA3 family monovalent cation:proton (H+) antiporter-3 subunit D (mnhD2)	10262	6874.5		SA0810	Na+/H+ antiporter subunit D	1552.75	1552.75
P	mnhC	NWMN_0820	CPA3 family monovalent cation:proton (H+) antiporter-3 subunit C (mnhC2)	20300.8	12112.2		SA0811	Na(+)/H(+) antiporter subunit C	10344.5	10683
P	mnhB	NWMN_0821	monovalent cation/H+ antiporter subunit B	29629	13094		SA0812	Na(+)/H(+) antiporter subunit B	10106.5	11264
C	mnhA	NWMN_0822	monovalent cation/H+ antiporter subunit A	15747.1	9455.07		SA0813	Na+/H+ antiporter subunit A	2763.5	2870
	kapB	NWMN_0823	hypothetical protein	6404.5	3508.5		SA0814	kinase	1920.5	696.5
O	ppi	NWMN_0824	peptidyl-prolyl cis-trans isomerase cyclophilin-type	3638	2989.5		SA0815	peptidyl-prolyl cis-trans isomerase	595.5	737.5
J	-	NWMN_0825	general stress protein 13	3151	3196.5		SA0816		119.5	184
C	namA	NWMN_0826	FMN oxidoreductase	5414.5	3597.5		SA0817	NADH-dependent flavin oxidoreductase	484	624.5
E	rocD	NWMN_0827	ornithine--oxo-acid transaminase	38552.2	23074.1		SA0818	Ornithine aminotransferase 2	8169	27355.5
E	gudB	NWMN_0828	glutamate dehydrogenase NAD-specific	29940.6	23321.3
C	glpQ	NWMN_0830	glycerophosphoryl diester phosphodiesterase	2362.71	1217.93		SA0820	glycerophosphodiester phosphodiesterase	621	945.5
E	argH	NWMN_0831	argininosuccinate lyase	218.35	175.75		SA0821	argininosuccinate lyase	0.5	41
E	argG	NWMN_0832	argininosuccinate synthase	409.55	294.3		SA0822	argininosuccinate synthase	51	185
G	pgi	NWMN_0833	glucose-6-phosphate isomerase	18269	12207		SA0823	glucose-6-phosphate isomerase	679	1381.5
S	-	NWMN_0834	hypothetical protein	1750	1234		SA0824	TVP38/TMEM64 family protein	156.5	203
U	spsA	NWMN_0835	Signal peptidase IA	2436.5	1321.4		SA0825	signal peptidase I	256.5	291.5
U	spsB	NWMN_0836	Signal peptidase IB	1907	1563		SA0826	signal peptidase I EC:3.4.21.89	275.5	300.5
L	addB	NWMN_0837	exonuclease RexB	6171.07	3141.07		SA0827	helicase-exonuclease AddAB subunit AddB	699.5	863.5
L	rexA	NWMN_0838	ATP-dependent nuclease subunit A	5786	3897.5		SA0828	helicase-exonuclease AddAB subunit AddA	940.75	1195
Q	mhpD	NWMN_0839	fumarylacetoacetate hydrolase	22226.5	19598		SA0829	fumarylacetoacetate hydrolase family protein	4499.5	5819
	-	NWMN_0840	hypothetical protein	786.75	683.95		SA0830	DUF1516 family protein	492	251
R	cdr	NWMN_0841	coenzyme A disulfide reductase	14348.5	10229.5		SA0831	CoA-disulfide reductase	1058.5	1125.5
R	yitU	NWMN_0842	HAD superfamily hydrolase	8025.25	4217.25		SA0832	Cof-type HAD-IIB family hydrolase	670	630.5
R	yitW	NWMN_0843	hypothetical protein	53508.5	38628		SA0833	metal-sulfur cluster assembly factor	4570.5	6596
I	clpB	NWMN_0844	hypothetical protein	186.45	154.25		SA0834	O-acetyltransferase	-7	-6.25
O	clpB	NWMN_0845	ATP-dependent Clp protease ATP-binding subunit ClpB	3250	2407.5		SA0835	ATP-dependent chaperone ClpB	135	342.75
K	lysR	NWMN_0846	LysR family regulatory protein	1149.54	441.49		SA0836	LysR family transcriptional regulator	24	-2
E	leuA2	NWMN_0847	2-isopropylmalate synthase	192.9	112.4		SA0837	2-isopropylmalate synthase	77.5	0
J	-	NWMN_0848	Sua5/YciO/YrdC/YwlC	237.764	174.379		SA0838	L-threonylcarbamoyladenylate synthase	-32.5	-22.5
G	-	NWMN_0849	hypothetical protein	1054.26	564.207		SA0839	membrane protein	-86.5	-66
R	-	NWMN_0850	hypothetical protein	1187.5	841.15		SA0840	YbhB/YbcL family Raf kinase inhibitor-like protein	32	-12
R	eap	NWMN_0851	MHC class II analog protein	6054.5	9220		SA0841	MAP domain-containing protein	304.5	506
	-	NWMN_0852	hypothetical protein	568.15	383.1
I	FabH	NWMN_0853	3-oxoacyl-(acyl carrier protein) synthase III	4955.5	3531.5		SA0842	ketoacyl-ACP synthase III	12547.5	7274
I	fab	NWMN_0854	3-oxoacyl- synthase	6612.5	5134.5		SA0843	beta-ketoacyl-ACP synthase II EC:2.3.1.179	4387.5	3349
	oppB	NWMN_0855	hypothetical protein	644.2	454.25		SA0844	DUF3899 domain-containing protein	253.5	93
E	oppB	NWMN_0856	oligopeptide transport system permease protein	19797.1	9964.93		SA0845	ABC transporter permease	1103.5	660.5
E	oppC	NWMN_0857	oligopeptide ABC transporter permease protein	24811	11193		SA0846	ABC transporter permease	3595.5	2056.5
E	oppD	NWMN_0858	oligopeptide transport ATP-binding protein	19836.1	7604.21		SA0847	ABC transporter ATP-binding protein	1968	527
E	oppF	NWMN_0859	oligopeptide ABC transporter ATP-binding protein	45090.5	20105.5		SA0848	ATP-binding cassette domain-containing protein	2502	1222.5
E	oppA	NWMN_0860	oligopeptide ABC transporter substrate-binding protein	27826	14975		SA0849	peptide ABC transporter substrate-binding protein	1425.25	613
E	oppA	NWMN_0861	oligopeptide ABC transporter substrate-binding protein	158.75	54.515		SA0850	oligopeptide ABC transporter substrate-binding protein	-1.5	-43
E	dppD	NWMN_0862	oligopeptide ABC transporter ATP-binding protein	120.75	72.425		SA0851	ABC transporter ATP-binding protein	-3.5	-89.5
E	appF	NWMN_0863	oligopeptide ABC transporter ATP-binding protein	319.3	199.4		SA0852	dipeptide ABC transporter ATP-binding protein	-34.5	-111.5
E	appB	NWMN_0864	oligopeptide ABC transporter permease protein	255.9	205.9		SA0853	ABC transporter permease	-24.5	-28.5
E	oppC	NWMN_0865	oligopeptide ABC transporter permease protein	604.771	475.271		SA0854	ABC transporter permease	1699.5	150
J	trpS	NWMN_0866	tryptophanyl-tRNA synthetase	9260.5	7701		SA0855	tryptophan--tRNA ligase	1182.5	1213.5
P	spxA	NWMN_0867	transcriptional regulator Spx	3866	9166.5		SA0856	transcriptional regulator Spx	1827	2691
O	mecA2	NWMN_0868	adaptor protein	13364	7959		SA0857	adaptor protein MecA	440	573.5
R	coiA	NWMN_0869	competence protein	230	142.05		SA0858	competence protein CoiA	-25	-25
E	pepF	NWMN_0870	oligoendopeptidase F	22017.5	5953.01		SA0859	oligoendopeptidase F	314	160.5
Q	yjbM	NWMN_0872	hypothetical protein	7510.5	4939.5		SA0860	DsbA family protein	369.5	478
R	hbo	NWMN_0873	hypothetical protein	11658	7648		SA0861	hypothetical protein	208	358.5
S	cyaA	NWMN_0874	hypothetical protein	3981.5	2838.5		SA0862	CYTH domain-containing protein	1366.5	28.5
	-	NWMN_0875	hypothetical protein	9568	5006.5		SA0863	hypothetical protein	684.5	1059
S	relQ	NWMN_0876	GTP pyrophosphokinase	8831.5	2326		SA0864	GTP pyrophosphokinase family protein	1304.5	1992
G	ppnK	NWMN_0877	inorganic polyphosphate/ATP-NAD kinase	8019.75	4966.25		SA0865	NAD(+) kinase	1302	1990
J	yjbO	NWMN_0878	RNA pseudouridylate synthase	2579.5	1051.55		SA0866	RluA family pseudouridine synthase	910.5	1099.5
P	mgtE	NWMN_0879	magnesium transporter	6297	3481		SA0867	magnesium transporter	1311.5	1839
P	-	NWMN_0880	monovalent cation/H+ antiporter-2 (CPA2)	6426.5	3825		SA0868	sodium:proton antiporter	861.25	1239.75
I	fabI	NWMN_0881	enoyl-(acyl carrier protein) reductase	16352	10561		SA0869	enoyl-ACP reductase FabI	3194.5	4171.5
R	-	NWMN_0882	hypothetical protein	6224.75	5241.5		SA0870	AI-2E family transporter	931	811
E	agcS	NWMN_0883	Na+/alanine symporter	828.75	420.35		SA0871	alanine:cation symporter family protein	372.5	234.75
P	fes	NWMN_0884	hypothetical protein	1101.85	663.25		SA0872	esterase family protein	5.5	2
J	-	NWMN_0885	hypothetical protein	20674	15160		SA0873	hypothetical protein	2513	5498.5
G	ltaA	NWMN_0886	hypothetical protein	1439	1020.98		SA0874	MFS transporter	350	295
M	ypfP	NWMN_0887	diacylglycerol glucosyltransferase	4265.17	2660		SA0875	diglucosyl diacylglycerol synthase	366	368.5
M	murE	NWMN_0888	UDP-N-acetylmuramoylalanyl-D-glutamate--2 6-diaminopimelate ligase	6154.5	3447		SA0876	UDP-N-acetylmuramoyl-L-alanyl-D-glutamate--L- lysine ligase	1889.5	1266
	-	NWMN_0889	hypothetical protein	4842.5	3180.5		SAS026	hypothetical protein	3333	2306.5
J	prfC	NWMN_0890	peptide chain release factor 3	531.85	509.6		SA0877	peptide chain release factor 3	1005.25	852.5
P	terC	NWMN_0891	hypothetical protein	1386	1054.05		SA0878	membrane protein	573.5	592
O	htrA	NWMN_0892	serine protease HtrA	2542	1249		SA0879	serine protease	237.25	259
P	ktrD	NWMN_0893	Na+ transporting ATP synthase	419.3	361		SA0880	TrkH family potassium uptake protein	316.5	228
F	-	NWMN_0894	5' nucleotidase	3944	2363.5		SA0881	bifunctional metallophosphatase/5'-nucleotidase	445.75	489.75
K	comK	NWMN_0895	competence transcription factor ComK-like protein	12916	6969		SA0882	competence protein ComK	29.5	40.5
	-	NWMN_0896	hypothetical protein	21888	22569		SA0883
H	lplJ	NWMN_0897	lipoyltransferase and lipoate-protein ligase	4599.5	2826		SA0884	lipoate--protein ligase	3467	3485.5
R	-	NWMN_0899	protease	1109.42	876.921		SA0885	CPBP family intramembrane metalloprotease	158	33
	-	NWMN_0900	hypothetical protein	312.9	123.376
J	-	NWMN_0901	membrane protein	471.35	241.2		SA0886	bacteriocin-associated integral membrane family protein	-15.5	-37.75
S	-	NWMN_0902	hypothetical protein	389.279	263.757		SA0887	YxeA family protein	-33.5	-22.5
V	-	NWMN_0903	ABC transporter ATP-binding protein	622.8	253.55		SA0888	ABC transporter ATP-binding protein	5.5	-4
	-	NWMN_0904	hypothetical protein	3642.5	2896		SA0889
	-	NWMN_0905	hypothetical protein	1907	2101
M	-	NWMN_0906	glycosyl transferase group 1	1331.1	1325.63
S	-	NWMN_0907	hypothetical protein	1143.5	810.4		SA0890	DoxX family protein	35	17.5
P	-	NWMN_0908	iron compound ABC transporter iron compound-binding protein	1450.5	992.35		SA0891	ABC transporter substrate-binding protein	-1	-17
S	-	NWMN_0909	hypothetical protein	2021	1203.5		SA0892
K	-	NWMN_0910	acetyltransferase	5308	3717.5		SA0893	GNAT family N-acetyltransferase	46.5	162.5
H	menA	NWMN_0911	1,4-dihydroxy-2-naphthoate octaprenyltransferase	4383	3394.7		SA0894	1,4-dihydroxy-2-naphthoate polyprenyltransferase	1179.5	1116.5
H	menF	NWMN_0912	hypothetical protein	7737.5	2501.9		SA0895	isochorismate synthase EC:5.4.4.2	800.25	485.75
H	menD	NWMN_0913	2-succinyl-6-hydroxy-2,4-cyclohexadiene-1-carboxylic acid synthase/2-oxoglutarate decarboxylase	13491.5	10176.5		SA0896	2-succinyl-5-enolpyruvyl-6-hydroxy-3- cyclohexene-1-carboxylic-acid synthase	1803.75	1225.5
R	menH	NWMN_0914	alpha/beta fold family hydrolase	17180	14612		SA0897	2-succinyl-6-hydroxy-2, 4-cyclohexadiene-1-carboxylate synthase	926.5	751
H	menB	NWMN_0915	naphthoate synthase	4553.75	5191		SA0898	1,4-dihydroxy-2-naphthoyl-CoA synthase	4167.25	3430.5
	sspC	NWMN_0916	cysteine protease	3995	4925.5		SA0899
	sspB	NWMN_0917	cysteine protease	3178.5	4121		SA0900	cysteine protease staphopain B	7.5	58
E	sspA	NWMN_0918	glutamyl endopeptidase	3742.4	4390.9		SA0901	serine protease	401.25	469.5
E	patA	NWMN_0919	aminotransferase class I	2817.5	1898		SA0902	aminotransferase class I/II-fold pyridoxal phosphate-dependent enzyme	266.5	255
G	-	NWMN_0920	hypothetical protein	1217.45	852		SA0903	acyltransferase family protein	79	45
K	-	NWMN_0921	MarR family transcriptional regulator	4012.75	2308.3		SA0904	MarR family transcriptional regulator	-61.5	-48
G	atl	NWMN_0922	bifunctional autolysin	21984.2	11380.8		SA0905	bifunctional autolysin	6076.75	2756.25
K	-	NWMN_0923	acetyltransferase GNAT	2011.5	1031.75		SA0906	GNAT family N-acetyltransferase	148.5	31.5
R	-	NWMN_0924	hypothetical protein	2779.5	2212.5		SA0907
K	-	NWMN_0925	hypothetical protein	5860.07	3386		SA0908	polyisoprenyl-teichoic acid--peptidoglycan teichoic acid transferase	619.5	540
V	fmtA	NWMN_0926	fmt protein	1896.5	1561.5		SA0909	teichoic acid D-Ala esterase FmtA	151.5	371.5
C	qoxD	NWMN_0927	quinol oxidase subunit IV	2712.5	3683.5		SA0910	cytochrome aa3 quinol oxidase subunit IV	25342.5	37216.5
C	qoxC	NWMN_0928	cytochrome c oxidase subunit III	44414.8	48917.8		SA0911	cytochrome aa3 quinol oxidase subunit III	54892	56344
C	qoxB	NWMN_0929	quinol oxidase subunit I	65164	62591		SA0912	cytochrome aa3 quinol oxidase subunit I	55083.5	55910.2
C	qoxB	NWMN_0930	quinol oxidase AA3 subunit II	64312	59435.8		SA0913	cytochrome aa3 quinol oxidase subunit II	49313	56337.5
	-	NWMN_0931	hypothetical protein	18652.5	17031		SA0914	DUF5011 domain-containing protein	399	933.5
H	folD	NWMN_0932	FolD bifunctional protein	11411.5	16309		SA0915	bifunctional methylenetetrahydrofolate dehydrogenase/methenyltetrahydrofolate cyclohydrolase FolD	723	1671
F	purE	NWMN_0933	phosphoribosylaminoimidazole carboxylase catalytic subunit	4194	2258.5		SA0916	5-(carboxyamino)imidazole ribonucleotide mutase	201.5	394.5
F	purK	NWMN_0934	phosphoribosylaminoimidazole carboxylase ATPase subunit	5213.5	2673.5		SA0917	5-(carboxyamino)imidazole ribonucleotide synthase	40	46.5
F	purC	NWMN_0935	phosphoribosylaminoimidazole-succinocarboxamide synthase	4836	3016		SA0918	phosphoribosylaminoimidazolesuccinocarboxamide synthase	131.5	12
F	purQ	NWMN_0936	phosphoribosylformylglycinamidine synthase I	2446.5	1427.5		SA0920	phosphoribosylformylglycinamidine synthase subunit PurQ	601.5	203.5
F	purL	NWMN_0937	phosphoribosylformylglycinamidine synthase II	3488.5	2492.5		SA0921	phosphoribosylformylglycinamidine synthase subunit PurL	712.75	236
F	purF	NWMN_0938	amidophosphoribosyltransferase	2388	1723		SA0922	amidophosphoribosyltransferase	1271	178.5
F	purM	NWMN_0939	phosphoribosylaminoimidazole synthetase	3077	1948.5		SA0923	phosphoribosylformylglycinamidine cyclo-ligase	1198.5	246.5
F	purN	NWMN_0940	phosphoribosylglycinamide formyltransferase	7418.5	4155.5		SA0924	phosphoribosylglycinamide formyltransferase	1180.5	307
F	purH	NWMN_0941	bifunctional phosphoribosylaminoimidazolecarboxamide formyltransferase/IMP cyclohydrolase	5538.93	2609.16		SA0925	bifunctional phosphoribosylaminoimidazolecarboxamide formyltransferase/IMP cyclohydrolase	1134	413
F	purD	NWMN_0942	phosphoribosylamine--glycine ligase	2083.5	2019.5		SA0926	phosphoribosylamine--glycine ligase	1357.5	130.5
P	ykoC	NWMN_0943	cobalt transport	10990.5	2428.2		SA0927	energy-coupling factor transporter transmembrane protein EcfT	17	21.5
P	ykoD	NWMN_0944	hypothetical protein	42197.5	27539.5		SA0928	ABC transporter ATP-binding protein	566.5	362
S	ykoE	NWMN_0945	hypothetical protein	31582	20193.5		SA0929	thiamine ABC transporter permease	663	409
	-	NWMN_0946	hypothetical protein	3654.5	3622		SA0931	hypothetical protein	1791	2049.5
R	rlmI	NWMN_0947	hypothetical protein	8017.57	4810.43		SA0932	class I SAM-dependent rRNA methyltransferase	1116.5	1238.5
	-	NWMN_0948	hypothetical protein	11139	12086		SA0933	hypothetical protein	872	1135
G	ptsH	NWMN_0949	phosphocarrier protein HPr	25744	31764.2		SA0934
G	ptsI	NWMN_0950	phosphoenolpyruvate-protein phosphotransferase	14985.5	16140.5		SA0935	phosphoenolpyruvate--protein phosphotransferase	17169.8	17653.8
O	-	NWMN_0951	glutaredoxin	359.55	278.85		SA0936
C	cydA	NWMN_0952	cytochrome d ubiquinol oxidase subunit I	2083	1272.5		SA0937	cytochrome ubiquinol oxidase subunit I	559	249.5
C	cydB	NWMN_0953	cytochrome d ubiquinol oxidase subunit II	1780	1326.5		SA0938	cytochrome d ubiquinol oxidase subunit II	875	281
P	trkA	NWMN_0954	TrkA potassium uptake	15296.8	8686.75		SA0939	TrkA family potassium uptake protein	1072	513.5
R	rnjA	NWMN_0956	hypothetical protein	18888	13851.8		SA0940	ribonuclease J	3835.75	3562.75
J	def	NWMN_0957	peptide deformylase	1066.6	1045.17		SA0942	peptide deformylase	323.5	12
	-	NWMN_0958	hypothetical protein	5237	3904.5		SA0943	cell-wall-binding lipoprotein	52	19.5
C	pdhA	NWMN_0959	pyruvate dehydrogenase complex E1 component alpha subunit	34141.1	22728.5		SA0943-1
C	pdhB	NWMN_0960	pyruvate dehydrogenase complex E1 component pyruvate dehydrogenase beta subunit	64814.5	36433		SA0944	alpha-ketoacid dehydrogenase subunit beta	62654.5	56343.5
C	pdhC	NWMN_0961	branched-chain alpha-keto acid dehydrogenase subunit E2	47321	25206		SA0945	2-oxo acid dehydrogenase subunit E2	24216	42897.5
C	pdhD	NWMN_0962	dihydrolipoamide dehydrogenase	18501.5	17461.5		SA0946	dihydrolipoyl dehydrogenase	3961	7642
S	-	NWMN_0963	hypothetical protein	2300.5	1663.5		SA0947
K	-	NWMN_0964	Cro/CI family transcriptional regulator	782.6	495		SA0949	helix-turn-helix transcriptional regulator	708	421
E	potA	NWMN_0965	ABC transporter	694.45	450.3		SA0950	ABC transporter ATP-binding protein	525.5	403.5
E	potB	NWMN_0966	spermidine/putrescine ABC transporter permease protein	933.9	685.7		SA0951	ABC transporter permease	227.5	186
E	potC	NWMN_0967	spermidine/putrescine ABC transporter permease protein	869.7	654.6
E	potD	NWMN_0968	spermidine/putrescine ABC transporter spermidine/putrescine-binding protein	2373	1727		SA0953	spermidine/putrescine ABC transporter substrate-binding protein	1282	1264
	-	NWMN_0969	hypothetical protein	46682.9	46603.8		SA0954	DUF4064 domain-containing protein	2814.5	2683.5
	-	NWMN_0970	hypothetical protein	5047.5	3853.5		SA0955	DUF4064 domain-containing protein	-0.5	60
P	mntH	NWMN_0971	Mn2+/Fe2+ transporter NRAMP	19387.5	13432		SA0956	divalent metal cation transporter	191	93
S	-	NWMN_0972	hypothetical protein	9058.86	5302.43		SA0957	DUF1054 family protein	207	67
G	suhB2	NWMN_0973	inositol monophosphatase	18621.9	11345.9		SA0958	inositol monophosphatase	678.5	1352.5
T	typA	NWMN_0974	GTP-binding protein TypA	865.55	632		SA0959	translational GTPase TypA	2341.25	888.5
S	-	NWMN_0975	hypothetical protein	1927.14	1530.07		SAS032
	-	NWMN_0976	hypothetical protein	1976.88	1182.49		SA0960	hypothetical protein	166	309.5
S	-	NWMN_0977	hypothetical protein	3345	5198.43		SA0961	DUF1507 family protein	181.5	182
D	ftsW	NWMN_0978	cell division protein	5995.5	4005		SA0962	FtsW/RodA/SpoVE family cell cycle protein	890	636.5
C	pycA	NWMN_0979	pyruvate carboxylase	9386	5620.71		SA0963	pyruvate carboxylase	1757.25	1665.75
O	ctaA	NWMN_0980	heme A synthase	2089	2045		SA0964	heme A synthase	229	283.5
O	ctaB	NWMN_0981	protoheme IX farnesyltransferase	10278.5	6887		SA0965	protoheme IX farnesyltransferase	1268.5	862.5
S	-	NWMN_0982	hypothetical protein	14745	10580		SA0966	DUF420 domain-containing protein	2024	1546
S	-	NWMN_0983	hypothetical protein	9693.5	6594		SA0967	hypothetical protein	273	234.5
C	-	NWMN_0984	glycerophosphoryl diester phosphodiesterase	3631.07	2047.83		SA0969	glycerophosphodiester phosphodiesterase	1418.5	399.5
S	-	NWMN_0985	hypothetical protein	2934.14	1805.93		SA0970
	-	NWMN_0986	hypothetical protein	1123.5	687.15		SA0971
L	rsmD	NWMN_0987	hypothetical protein	1151.5	844.55		SA0972	16S rRNA (guanine(966)-N(2))-methyltransferase RsmD	358	315.5
H	coaD	NWMN_0988	pantetheine-phosphate adenylyltransferase	1266.5	883.5		SA0973	pantetheine-phosphate adenylyltransferase	119	105.5
R	-	NWMN_0989	hypothetical protein	1679	1077.85		SA0974	nucleotidyltransferase	270	205
R	ylbN	NWMN_0990	hypothetical protein	11658	8319.5		SA0975	DUF177 domain-containing protein	16069	8492.5
J	rpmF	NWMN_0991	50S ribosomal protein L32	16822.5	13724.5		SAS033
L		NWMN_0992	integrase	570.85	376.75
K	-	NWMN_0994	phage cI-like repressor	8806.5	6027
K	-	NWMN_0995	bacteriophage L54a antirepressor	1526.5	653.2
	-	NWMN_0996	hypothetical protein	1355	426.5
	-	NWMN_0998	hypothetical protein	1322.5	565.8
L	-	NWMN_0999	hypothetical protein	1094.6	489.4
S	-	NWMN_1038	phage holin	235.75	106.82
M	-	NWMN_1039	phage protein	534.35	380.55
M	isdB	NWMN_1040	neurofilament protein	655.35	305.6
M	isdA	NWMN_1041	iron-regulated heme-iron binding protein IsdA	3124.23	2553.45		SA0977
M	isdC	NWMN_1042	iron-regulated cell surface protein	773.043	452.507		SA0978	heme uptake protein IsdC	-9.5	-21
	isdD	NWMN_1043	hypothetical protein	683.1	211.05		SA0979	hypothetical protein	-4	7
P	isdE	NWMN_1044	iron compound ABC transporter	676.1	300.25		SA0980	heme ABC transporter substrate-binding protein IsdE	56	49
P	isdF	NWMN_1045	iron compound ABC transporter permease protein	1419	740.729		SA0981	iron ABC transporter permease	-22	-63
S	srtB	NWMN_1046	NPQTN-specific sortase B	723.793	326.358		SA0982	class B sortase	10.5	-7.5
R	isdG	NWMN_1047	heme-degrading monooxygenase IsdG	844.675	527.825		SA0983	staphylobilin-forming heme oxygenase IsdG	-33	-20.5
J	spoU/trmH	NWMN_1048	SpoU rRNA methylase	1568.89	1427.01		SA0984	RNA methyltransferase	1.5	-13
J	pheS	NWMN_1049	phenylalanyl-tRNA synthetase subunit alpha	2953	2051		SA0985	phenylalanine--tRNA ligase subunit alpha	1493.5	1351.5
J	pheT	NWMN_1050	phenylalanyl-tRNA synthetase beta subunit	3174.5	2160.5		SA0986	phenylalanine--tRNA ligase subunit beta	3165.5	3873.5
L	rnhC	NWMN_1051	ribonuclease HIII	977.7	363.77		SA0987	ribonuclease HIII	325.5	160
S	zapA	NWMN_1053	hypothetical protein	1577.5	1271.6		SA0988
R	cvpA	NWMN_1054	hypothetical protein	785.45	635.05		SA0989	CvpA family protein	213.5	146.5
E	polX	NWMN_1055	hypothetical protein	1542.5	1011.25		SA0990	DNA polymerase/3'-5' exonuclease PolX	1372.25	1208.75
L	mutS2	NWMN_1056	recombination and DNA strand exchange inhibitor protein	1301	958.35		SA0991	endonuclease MutS2	1112.75	1480
O	trxA	NWMN_1057	thioredoxin	4329.5	4606.79		SA0992	thioredoxin	303	348.5
L	uvrC	NWMN_1058	excinuclease ABC subunit C	10522	9207		SA0993	excinuclease ABC subunit UvrC	255.5	166.5
	-	NWMN_1059	hypothetical protein	51368	32284
C	sdhC	NWMN_1060	succinate dehydrogenase cytochrome b-558 subunit	50697	35656.5		SA0994	succinate dehydrogenase cytochrome B558	23926	32399.5
C	sdhA	NWMN_1061	succinate dehydrogenase flavoprotein subunit	54092	20680		SA0995	succinate dehydrogenase flavoprotein subunit	19750.2	32072.8
C	sdhB	NWMN_1062	succinate dehydrogenase iron-sulfur subunit	14975	16514.5		SA0996	succinate dehydrogenase iron-sulfur subunit	2495	6017.5
M	murI	NWMN_1063	glutamate racemase	7330.5	4457.5		SA0997	glutamate racemase	626	135
F	rdgB	NWMN_1064	hypothetical protein	5959.07	3970.5		SA0998	XTP/dITP diphosphatase	620.5	731
R	-	NWMN_1065	hypothetical protein	7517.93	5667.5		SA0999	metallophosphoesterase	212	229.5
	efb	NWMN_1066	fibrinogen-binding protein-related	4559.5	3096.5		SA1000	fibrinogen-binding protein
	flr	NWMN_1067	formyl peptide receptor-like 1 inhibitory protein	462.5	277.6		SA1001	FPRL1 inhibitory protein	531	2629
	-	NWMN_1068	hypothetical protein	2153.5	1728		SA1002	hypothetical protein	-9.5	1
M	efb	NWMN_1069	fibrinogen-binding protein	23147	15403		SA1003	fibrinogen-binding protein	0	-20
	scc	NWMN_1070	fibrinogen-binding protein -related protein	12427.5	12252.5		SA1004	fibrinogen-binding protein	30.5	12.5
	-	NWMN_1071	hypothetical protein	3431.5	2148		SAS035	hypothetical protein
	-	NWMN_1072	hypothetical protein	3471	2913		SA1005	hypothetical protein
	hla	NWMN_1073	alpha-hemolysin	22533	33147		SA1007	beta-channel forming cytolysin	23.5	303.75
	-	NWMN_1074	hypothetical protein	586	513.25		SA1008	hypothetical protein
	ssl12	NWMN_1075	superantigen-like protein	100.285	83.695		SA1009	superantigen-like protein SSL12	-90.5	-78.5
	ssl13	NWMN_1076	superantigen-like protein	165.6	77.535		SA1010	superantigen-like protein SSL13	19.5	-14.5
	ssl14	NWMN_1077	superantigen-like set3 protein	142.35	113.66		SA1011	superantigen-like protein SSL14	-118	-104
E	argF	NWMN_1078	ornithine carbamoyltransferase	634.857	438.2		SA1012	ornithine carbamoyltransferase	135	211
E	arcC1	NWMN_1079	carbamate kinase	552.8	446.55		SA1013	carbamate kinase	-11.5	-12.5
S	arcD	NWMN_1080	hypothetical protein	1389.85	1308.5		SA1014	YfcC family protein	174.5	166
	-	NWMN_1081	hypothetical protein	1351	701
P	eta	NWMN_1082	exfoliative toxin A	1092.3	660.975		SA1016	TDT family transporter	29.5	21.5
	psm�1	NWMN_1084	antibacterial protein	55860	56855.5
R	yjjG	NWMN_1085	HAD superfamily hydrolase	1386.5	974.8		SA1018	noncanonical pyrimidine nucleotidase, YjjG family	209	338.5
K	-	NWMN_1086	hypothetical protein	29496.5	19875.5		SA1019	N-acetyltransferase	1257	3322
S	bshC	NWMN_1087	hypothetical protein	2531.29	1751.64		SA1020	bacillithiol biosynthesis cysteine-adding enzyme BshC	628	424.75
S	mraZ	NWMN_1088	cell division protein MraZ	25353	9033.8		SA1021	transcriptional regulator MraZ	3054	3984
M	mraW	NWMN_1089	S-adenosyl-methyltransferase MraW	34169.5	29511.5		SA1022	16S rRNA (cytosine(1402)-N(4))-methyltransferase RsmH	3490.5	3803.5
D	ftsL	NWMN_1090	cell division protein	35407.5	21977		SA1023	cell division protein FtsL	2484.5	2044
M	pbpA	NWMN_1091	penicillin-binding protein 1	1519.5	1919		SA1024	penicillin-binding protein	1046.75	1185.25
M	mraY	NWMN_1092	phospho-N-acetylmuramoyl-pentapeptide-transferase	4776	4800		SA1025	phospho-N-acetylmuramoyl-pentapeptide- transferase	4734.5	4519.5
M	murD	NWMN_1093	UDP-N-acetylmuramoyl-L-alanyl-D-glutamate synthetase	9040	7691.5		SA1026	UDP-N-acetylmuramoyl-L-alanine--D-glutamate ligase	3487.75	4077.25
M	div1b	NWMN_1094	cell division protein	6632.5	5752		SA1027	cell division protein FtsQ/DivIB	5271.5	6258.5
D	ftsA	NWMN_1095	cell division protein	19311	15674.5		SA1028	cell division protein FtsA	14805.5	16046.5
D	ftsZ	NWMN_1096	cell division protein FtsZ	25495.5	21722		SA1029	cell division protein FtsZ	13341.5	16907
S	-	NWMN_1097	hypothetical protein	21426.8	12398.2		SA1030	peptidoglycan editing factor PgeF	1060	962
R	ylmE	NWMN_1098	hypothetical protein	24550.2	17275.5		SA1031	YggS family pyridoxal phosphate-dependent enzyme	4169.5	3348.5
S	ylmF	NWMN_1099	hypothetical protein	5098.75	3239.78		SA1032	cell division protein SepF	1910	1355
S	ylmG	NWMN_1100	hypothetical protein	1998	2179.5		SA1033	YggT family protein	928.5	504
S	ylmH	NWMN_1101	hypothetical protein	1095	693.4		SA1034		476	191.5
D	-	NWMN_1102	hypothetical protein	19042.5	10669		SA1035	DivIVA domain-containing protein	1156	715
J	ileS	NWMN_1103	isoleucyl-tRNA synthetase	2360.5	1755		SA1036	isoleucine--tRNA ligase	6498.75	6031.5
	-	NWMN_1104	hypothetical protein	84.685	64.295
R	gloA2	NWMN_1105	glyoxalase	1530	1106.7		SA1037	VOC family protein	234.5	283
M	lspA	NWMN_1107	lipoprotein signal peptidase	1961	1392.5		SA1039	lipoprotein signal peptidase	2667.5	1385.5
J	rluD	NWMN_1108	pseudouridylate synthase	1444.36	1170.81		SA1040	RluA family pseudouridine synthase	2670	2230
F	pyrR	NWMN_1109	pyrimidine regulatory protein PyrR	3921.79	2908.71		SA1041	bifunctional pyr operon transcriptional regulator/uracil phosphoribosyltransferase PyrR	1869	541
F	pyrP	NWMN_1110	uracil permease	1571	943.8		SA1042	uracil permease	12680.5	2066
F	pyrB	NWMN_1111	aspartate carbamoyltransferase catalytic subunit PyrB	3209.36	1469.93		SA1043	aspartate carbamoyltransferase	35951.5	5902.5
F	pyrC	NWMN_1112	dihydroorotase	4010	1933.25		SA1044	dihydroorotase	23817	3708
E	carA	NWMN_1113	carbamoyl phosphate synthase small subunit	2440	1292		SA1045	carbamoyl-phosphate synthase small subunit	16215	1674.5
E	carB	NWMN_1114	carbamoyl phosphate synthase large subunit	3625	1958.5		SA1046	carbamoyl-phosphate synthase large subunit	24818	2129.25
F	pyrF	NWMN_1115	orotidine 5'-phosphate decarboxylase	2514	1494		SA1047	orotidine-5'-phosphate decarboxylase	9633.5	791
F	pyrE	NWMN_1116	orotate phosphoribosyltransferase	1625	827.675		SA1048	orotate phosphoribosyltransferase	13238	1260
	-	NWMN_1117	hypothetical protein	714.286	501.843		SA1049	hypothetical protein	9078	771.5
S	-	NWMN_1118	hypothetical protein	5337	3329.5		SA1050	VOC family protein	1190	970.5
K	fbpA	NWMN_1119	fibronectin-binding protein A-related	3660	2411.5		SA1051	fibronectin-binding domain-containing protein	367.5	437.5
F	gmk	NWMN_1120	guanylate kinase	20917	16181		SA1052	guanylate kinase	536	474
H	coaBC	NWMN_1121	phosphopantothenoylcysteine decarboxylase/phosphopantothenate--cysteine ligase	3658.5	2348		SA1054	bifunctional phosphopantothenoylcysteine decarboxylase/phosphopantothenate--cysteine ligase CoaBC	337	359
L	priA	NWMN_1122	primosomal protein N	8882.5	4970		SA1055	primosomal protein N'	528.25	619.25
	-	NWMN_1123	hypothetical protein	1022.9	653.5		SA1056	hypothetical protein	219	144
S	xynA	NWMN_1124	hypothetical protein	53909.5	49012		SA1057	hypothetical protein
J	def2	NWMN_1125	polypeptide deformylase	7532.64	4410.86		SA1058	peptide deformylase	676.5	470.5
J	fmt	NWMN_1126	methionyl-tRNA formyltransferase	11465	6927		SA1059	methionyl-tRNA formyltransferase	2758	1779
J	sun	NWMN_1127	sun protein	12760.2	8542.93		SA1060	16S rRNA (cytosine(967)-C(5))-methyltransferase RsmB	4855	3327
R	rlmN	NWMN_1128	hypothetical protein	7774	5224		SA1061	23S rRNA (adenine(2503)-C(2))-methyltransferase RlmN	2096	1399.5
T	prpC	NWMN_1129	protein phosphatase 2C domain-containing protein	7460	5246.5		SA1062	protein-serine/threonine phosphatase Stp1	2423.5	1785.5
R	prkC	NWMN_1130	serine/threonine-protein kinase	6763	47.015		SA1063	serine/threonine protein kinase Stk1	2315.25	206.25
R	engC	NWMN_1131	hypothetical protein	3104.5	2405.5		SA1064	ribosome small subunit-dependent GTPase A	963	1196.5
G	cfxE	NWMN_1132	ribulose-phosphate 3-epimerase	4500.88	3916.88		SA1065	ribulose-phosphate 3-epimerase	1141	1484.5
H	yloS	NWMN_1133	hypothetical protein	2385.5	2116		SA1066	thiamine diphosphokinase	356.5	448.5
J	rpmB	NWMN_1134	50S ribosomal protein L28	1365.29	2818.07		SA1067	Ribosomal L28 family
S	vfrA	NWMN_1135	hypothetical protein	16508	11986		SA1068	Asp23/Gls24 family envelope stress response protein	6427.5	5282.5
R	vfrB	NWMN_1136	DAK2 domain-containing protein	12257.9	9010.43		SA1069	DAK2 domain-containing protein	4121.75	3362.75
L	recG	NWMN_1137	ATP-dependent DNA helicase RecG	6754	4605		SA1070	ATP-dependent DNA helicase RecG	340.25	295
Q	fapR	NWMN_1138	fatty acid biosynthesis transcriptional regulator	6028.5	2385.65		SA1071	transcription factor FapR	9688.5	5059.5
I	plsX	NWMN_1139	glycerol-3-phosphate acyltransferase PlsX	7158	5078		SA1072	phosphate acyltransferase PlsX	19197	12999
I	fabD	NWMN_1140	malonyl CoA-acyl carrier protein transacylase	4344.75	3325.25		SA1073	ACP S-malonyltransferase	11418.5	8650.5
I	fabG	NWMN_1141	3-oxoacyl-(acyl-carrier-protein) reductase	2505	2297.5		SA1074	3-oxoacyl-[acyl-carrier-protein] reductase	16060.5	12798.5
I	acpP	NWMN_1142	acyl carrier protein	1626	2314.5		SA1075	acyl carrier protein	1761.5	2891.5
K	rnc	NWMN_1143	ribonuclease III	2925	1144.25		SA1076	ribonuclease III	755	873
D	smc	NWMN_1144	SMC domain-containing protein	3687.33	1917.17		SA1077	chromosome segregation protein SMC	952.5	904.25
U	ftsY	NWMN_1145	signal recognition particle-docking protein FtsY	5250	3001.5		SA1078	signal recognition particle-docking protein FtsY	2317	2158
S	-	NWMN_1146	hypothetical protein	5446	3198		SA1079	putative DNA-binding protein	4770	4382
U	ffh	NWMN_1147	signal recognition particle protein	5212	3632.5
J	rpsP	NWMN_1148	30S ribosomal protein S16	1331	1591.5		SA1081	30S ribosomal protein S16	880.5	235.5
J	rimM	NWMN_1149	16S rRNA processing protein	1150	836.9		SA1082	ribosome maturation factor RimM	314.5	92.5
J	trmD	NWMN_1150	tRNA (guanine-N1)-methyltransferase	1335	1179		SA1083	tRNA (guanosine(37)-N1)-methyltransferase TrmD	1536.5	564.5
J	rplS	NWMN_1151	50S ribosomal protein L19	790.1	871.65		SA1084	Ribosomal protein L19; Region
S	yfhO	NWMN_1152	hypothetical protein	4716	2865.5		SA1085	YfhO family protein	213	276.5
R	rbgA	NWMN_1153	ribosomal biogenesis GTPase	1543.5	1052.95		SA1086	ribosome biogenesis GTPase YlqF	672	436.5
L	rnhB	NWMN_1154	ribonuclease HII	2187.21	1156.14		SA1087	ribonuclease HII	2292	1727.5
C	sucC	NWMN_1155	succinyl-CoA synthetase subunit beta	49590.5	46885.8		SA1088	ADP-forming succinate--CoA ligase subunit beta	15878	39322
C	sucD	NWMN_1156	succinyl-CoA synthetase subunit alpha	36837	31837		SA1089	succinate--CoA ligase subunit alpha	12339.5	38220
M	lytN	NWMN_1157	cell wall hydrolase	340	334.45		SA1090	LysM peptidoglycan-binding domain-containing protein	-30.5	11
V	fmhC	NWMN_1158	methicillin resistance-related protein FmhC	291.9	235.85		SA1091	FemA/FemB family glycyltransferase FmhC	-17.5	-41.5
L	smf	NWMN_1159	hypothetical protein	1065.5	511.35		SA1092	DNA-protecting protein DprA	-28.5	-89
L	topA	NWMN_1160	DNA topoisomerase I	24819.5	15880		SA1093	type I DNA topoisomerase	3504.75	1596
J	gid	NWMN_1161	tRNA (uracil-5-)-methyltransferase Gid	9247.86	8492.86		SA1094	methylenetetrahydrofolate--tRNA-(uracil(54)- C(5))-methyltransferase (FADH(2)-oxidizing) TrmFO	390	214.5
L	xerC	NWMN_1162	site-specific recombinase	18877.5	12303		SA1095	tyrosine recombinase XerC	2275	2056.5
O	clpQ	NWMN_1163	ATP-dependent protease peptidase subunit	15775	9607.25		SA1096	ATP-dependent protease subunit HslV	1112	796.5
O	hslU	NWMN_1164	ATP-dependent protease ATP-binding subunit	12746	8169.5		SA1097	heat shock protein, ATP-dependent protease
K	codY	NWMN_1165	transcriptional repressor CodY	8584.5	6015.5		SA1098	GTP-sensing pleiotropic transcriptional regulator CodY	2143	2669
J	rpsB	NWMN_1166	30S ribosomal protein S2	6347	4072		SA1099	30S ribosomal protein S2	10786	6933
J	tsf	NWMN_1167	elongation factor Ts	22866.5	16971.8		SA1100	elongation factor Ts	6832	5561
F	pyrH	NWMN_1168	uridylate kinase	9357	6310.6		SA1101	UMP kinase	794.5	470.5
J	frr	NWMN_1169	ribosome recycling factor	6321.5	5249.5		SA1102	ribosome recycling factor	2649	1872.5
I	uppS	NWMN_1170	undecaprenyl diphosphate synthase	3599	3361.5		SA1103	isoprenyl transferase	2861	1299.5
I	cdsA	NWMN_1171	phosphatidate cytidylyltransferase	1139.5	838		SA1104	phosphatidate cytidylyltransferase	738.5	292.5
M	rseP	NWMN_1172	membrane-associated zinc metalloprotease	2791.5	2152		SA1105	RIP metalloprotease RseP	2129	1858.5
J	proS	NWMN_1173	prolyl-tRNA synthetase	2478.5	2154		SA1106	proline--tRNA ligase	592.75	551
L	polC	NWMN_1174	DNA polymerase III PolC	10590	6226.5		SA1107	DNA polymerase III subunit alpha (polC)	1515	1227.25
S	rimP	NWMN_1175	hypothetical protein	7666.14	4769.64		SA1108	ribosome maturation factor RimP	7052	5684
K	nusA	NWMN_1176	transcription elongation factor NusA	4932.5	3034		SA1109	transcription termination/antitermination protein NusA	1030	840
J	rpl7AE	NWMN_1177	ribosomal protein L7Ae	12585	7615		SA1111	ribosomal protein L7AE family
J	infB	NWMN_1178	translation initiation factor IF-2	3991.5	2863.5		SA1112	translation initiation factor IF-2	4601.5	4885.75
J	rbfA	NWMN_1179	ribosome-binding factor A	3029	2852.5		SA1113	30S ribosome-binding factor RbfA	241.5	288.5
J	truB	NWMN_1180	tRNA pseudouridine synthase B	6968.5	5920		SA1114	tRNA pseudouridine(55) synthase TruB	59	33.5
H	ribC	NWMN_1181	riboflavin biosynthesis protein RibF	7582.43	6687.86		SA1115	riboflavin biosynthesis protein RibF	269.5	88.5
J	rpsO	NWMN_1182	30S ribosomal protein S15	8500.5	8557.5		SA1116	30S ribosomal protein S15	1621	1351.5
J	pnpA	NWMN_1183	polynucleotide phosphorylase/polyadenylase	16524	10330		SA1117	polyribonucleotide nucleotidyltransferase	6052.75	3097.75
R	rnjB	NWMN_1184	RNA-metabolising metallo-beta-lactamase	7304.5	6619.5		SA1118	ribonuclease J	3354	2531.5
D	spoIIIE	NWMN_1185	DNA translocase FtsK/SpoIIIE	6017	4750.5		SA1119	DNA translocase FtsK	9360.5	8385.5
K	-	NWMN_1186	transcriptional regulator GntR	3956.5	2259.6		SA1120	GntR family transcriptional regulator	469.5	224
R	-	NWMN_1187	hypothetical protein	1974.5	1661.75		SA1121	insulinase family protein	534	147
R	-	NWMN_1188	peptidase M16	3644.5	3179.5		SA1122	insulinase family protein	1327	994.5
I	phbB	NWMN_1189	acetoacetyl-CoA reductase	4315.5	3024.5		SA1123	SDR family NAD(P)-dependent oxidoreductase	2561	1870
	-	NWMN_1190	ACT domain-containing protein	6062	4307		SA1124	DUF3388 domain-containing protein	1476.5	1500.5
S	-	NWMN_1191	transcriptional regulator Cro/CI	3975.5	3511.5		SA1125	helix-turn-helix domain-containing protein	754	946
I	pgsA	NWMN_1192	CDP-diacylglycerol--glycerol-3-phosphate 3-phosphatidyltransferase	5877.5	4547.5		SA1126	CDP-diacylglycerol--glycerol-3-phosphate 3-phosphatidyltransferase	520	614
I	cinA	NWMN_1193	competence-damage inducible protein cinA	2568	1849.5		SA1127	CinA family nicotinamide mononucleotide deamidase-related protein	373.5	383.5
L	recA	NWMN_1194	recombinase A	13714.5	10597		SA1128	recombinase RecA	603.5	667.5
R	cvfA	NWMN_1195	phosphodiesterase	3312	3439.5		SA1129	ribonuclease Y	2257.5	2228
	-	NWMN_1196	hypothetical protein	528.1	432.55		SAS037	hypothetical protein
S	-	NWMN_1197	hypothetical protein	1857.5	1239.75		SA1130	TIGR00282 family metallophosphoesterase	486	302
C	porA	NWMN_1198	pyruvate flavodoxin ferredoxin oxidoreductase alpha subunit	9111.5	4737		SA1131	2-oxoacid:acceptor oxidoreductase subunit alpha	1897.5	2031.25
C	porB	NWMN_1199	2-oxoglutarate ferredoxin oxidoreductase subunit beta	7377	4659		SA1132	2-oxoacid:ferredoxin oxidoreductase subunit beta	1343.5	1744
S	-	NWMN_1200	hypothetical protein	4755.43	2759.07		SA1133	hypothetical protein	318.5	347.5
J	miaB	NWMN_1201	tRNA-i(6)A37 modification enzyme MiaB	5078	4730		SA1134	tRNA (N6-isopentenyl adenosine(37)-C2)-methylthiotransferase MiaB	1010.25	716.75
S	-	NWMN_1202	hypothetical protein	4016.5	3181.5		SA1135	hypothetical protein	1345	935.5
S	thiW	NWMN_1203	hypothetical protein	1642.36	1278.2		SA1136	energy coupling factor transporter S component ThiW	539	499.5
L	mutS	NWMN_1204	DNA mismatch repair protein	2959.29	1857.86		SA1137	DNA mismatch repair protein MutS	2026	1642.75
L	mutL	NWMN_1205	DNA mismatch repair protein HexB	2016	1460.5		SA1138	DNA mismatch repair endonuclease MutL	1927.5	1576.5
K	glpP	NWMN_1206	glycerol uptake operon antiterminator regulatory protein	1375.5	1027		SA1139	glycerol-3-phosphate responsive antiterminator	586	561.5
G	glpF	NWMN_1207	glycerol uptake facilitator protein	25470	20275.5		SA1140	aquaporin family protein	1527	1787
C	glpK	NWMN_1208	glycerol kinase	3075	2462.5		SA1141	glycerol kinase GlpK	1918	4187
C	glpD	NWMN_1209	aerobic glycerol-3-phosphate dehydrogenase	11609.5	9016.5		SA1142	glycerol-3-phosphate dehydrogenase/oxidase	1944	3603.5
I	-	NWMN_1210	hydrolase alpha/beta fold domain-containing protein	2789.5	1027.45		SA1143	alpha/beta hydrolase	294.5	284
J	miaA	NWMN_1211	tRNA delta(2)-isopentenylpyrophosphate transferase	2999.25	1923		SA1144	tRNA (adenosine(37)-N6)-dimethylallyltransferase MiaA	314	138.5
R	hfq	NWMN_1212	host factor 1 protein	670.7	416.225		SA1145	RNA chaperone Hfq	-0.5	27.5
O	bsaA	NWMN_1213	glutathione peroxidase	17805.5	13846.5		SA1146	glutathione peroxidase	281.5	348.5
R	hflX	NWMN_1214	GTP-binding protein	1426.25	739.778		SA1147	GTPase HflX	361	352
P	Alu-2	NWMN_1215	hypothetical protein	1309.5	863.95		SA1148	aminotransferase class I/II-fold pyridoxal phosphate-dependent enzyme	431.5	357
K	glnR	NWMN_1216	glutamine synthetase repressor	19559.5	12307.5		SA1149	MerR family transcriptional regulator	2601	3029.5
E	glnA	NWMN_1217	glutamine synthetase	14523	13388		SA1150	type I glutamate--ammonia ligase	3667.5	2166.5
	-	NWMN_1218	hypothetical protein	566	279.9
	-	NWMN_1222	hypothetical protein	69.811	25.1896		SA1153	hypothetical protein
T	-	NWMN_1223	hypothetical protein	518.017	450.027
	-	NWMN_1224	hypothetical protein	752.18	407.45
K	-	NWMN_1225	hypothetical protein	1596.5	1319.5
	-	NWMN_1226	hypothetical protein	636.95	418.4
E	gLY1	NWMN_1228	hypothetical protein	1346.3	1590.5		SA1154	low specificity L-threonine aldolase	-51.5	-75.5
	-	NWMN_1229	hypothetical protein	490.9	222.9
I	cls1	NWMN_1230	cardiolipin synthetase	6927.5	3972		SA1155	cardiolipin synthase	411	516.25
V	-	NWMN_1231	ABC transporter ATP-binding protein	642.557	386.986		SA1156	ABC transporter ATP-binding protein	-21.5	-9
V	-	NWMN_1232	ABC transporter permease protein	858.571	635.686		SA1157	ABC transporter permease	20	-3.5
T	-	NWMN_1233	histidine kinase	3599.5	2298		SA1158	sensor histidine kinase	112	124.5
T	-	NWMN_1234	two-component response regulator	1271.5	984.7		SA1159	two-component response regulator
	-	NWMN_1235	hypothetical protein	1937	2426.5		SAS041	hypothetical protein
L	nucI	NWMN_1236	thermonuclease	380.3	297.85		SA1160	thermonuclease	1.5	-2
	-	NWMN_1237	hypothetical protein	5631.5	4405		SA1161	hypothetical protein	85.5	112
	-	NWMN_1238	hypothetical protein	4025.29	2287		SA1162	hypothetical protein	0	-67
E	thrA	NWMN_1239	aspartate kinase (lysC1/ThrA)	7456.5	4058		SA1163	aspartate kinase	226	265.5
E	dhoM	NWMN_1240	homoserine dehydrogenase	27922	17868		SA1164	homoserine dehydrogenase	453	429
E	thrC	NWMN_1241	threonine synthase	11842.5	7760		SA1165	threonine synthase	353	221
E	thrB	NWMN_1242	homoserine kinase	20768.1	13736.9		SA1166	homoserine kinase	-14	-39.5
R	-	NWMN_1243	haloacid dehalogenase-like hydrolase	12741.5	9432.5		SA1167	Cof-type HAD-IIB family hydrolase	189	152.5
	-	NWMN_1244	hypothetical protein	4167	3775.5		SA1168	hypothetical protein	-17.5	53
E	lysP2	NWMN_1245	amino acid permease	10935.8	6562.25		SA1169	amino acid permease	408	212.5
P	katA	NWMN_1246	catalase	65174.5	65172		SA1170	catalase	4138.75	5428.25
J	rpmG	NWMN_1247	50S ribosomal protein L33	3730	4606.5		SAS042	50S ribosomal protein L33	1267	1950
J	rpsN	NWMN_1248	30S ribosomal protein S14	665.95	761.6		SA1171	Ribosomal protein S14p/S29e
F	guaC	NWMN_1249	guanosine 5'-monophosphate oxidoreductase	299.983	158.833		SA1172	GMP reductase	266.5	245.5
S	-	NWMN_1250	hypothetical protein	4161	3053		SA1173	CAP domain-containing protein	238	241.5
K	lexA	NWMN_1251	LexA repressor	8968	8470.5		SA1174	transcriptional repressor LexA	626.5	186.5
	-	NWMN_1252	hypothetical protein	488.85	423.35		SA1175	hypothetical protein
S	-	NWMN_1253	hypothetical protein	9880.5	5010.5		SA1176	hypothetical protein
G	tkt	NWMN_1254	transketolase	12805.2	11214		SA1177	transketolase	4389	6810
S	-	NWMN_1255	hypothetical protein	1055.55	1049.2		SA1178	hypothetical protein
O	ccdC	NWMN_1256	hypothetical protein	602.971	529.501		SA1179	DUF1453 family protein	3024.5	3579
L	sbcD	NWMN_1257	exonuclease SbcD	802.3	449.65		SA1180	exonuclease SbcCD subunit D	69	28
L	sbcC	NWMN_1258	exonuclease SbcC	1053.54	350.05		SA1181	SMC family ATPase	73.25	118
	-	NWMN_1259	hypothetical protein	3392.5	2386.5
M	mscL	NWMN_1260	large conductance mechanosensitive channel	5171	6708.5		SA1182	large conductance mechanosensitive channel protein MscL	1807.5	1501
M	opuD	NWMN_1261	glycine betaine transporter	467.6	540.35		SA1183	BCCT family transporter	2553.5	2609.75
C	citB	NWMN_1263	aconitate hydratase	6226	4896.5		SA1184	aconitate hydratase AcnA	7995.75	16094
R	-	NWMN_1264	hypothetical protein	4086.5	3086		SA1185	acyl-CoA thioesterase	712	796
S	-	NWMN_1265	hypothetical protein	539.85	492.3		SA1186	hypothetical protein	160	177.5
S	plsY	NWMN_1266	hypothetical protein	2956	2919.5		SA1187	hypothetical protein
L	parE	NWMN_1267	DNA topoisomerase IV subunit B	2440.5	1616		SA1188	DNA topoisomerase IV subunit B	1400.25	885.75
L	parC	NWMN_1268	DNA topoisomerase IV subunit A	1395	1071.65		SA1189	DNA topoisomerase 4 subunit A	6248	7802.5
E	alsT	NWMN_1269	sodium:alanine symporter	390.2	344.85		SA1190	alanine:cation symporter family protein	605	397
K	glcT	NWMN_1270	transcription antiterminator	8761	5398.5		SA1191	transcription antiterminator	338	10
R	yrrI	NWMN_1271	hypothetical protein	17487.5	12324.5		SA1192	AI-2E family transporter	1566.5	1640.5
S	fmtC	NWMN_1272	oxacillin resistance-related FmtC protein	21606	11663.5		SA1193	bifunctional lysylphosphatidylglycerol flippase/synthetase MprF	2092.5	1984
O	msrA	NWMN_1273	methionine sulfoxide reductase A	8880	5259.5		SA1194	peptide-methionine (S)-S-oxide reductase MsrA	239.5	160.5
K	msrR	NWMN_1274	transcriptional regulator	631.25	572.5		SA1195	LytR family transcriptional regulator	52	103.75
R	dmpI	NWMN_1275	4-oxalocrotonate tautomerase	6185	7019		SAS044	4-oxalocrotonate tautomerase	80.5	170.5
L	dinB2	NWMN_1276	ImpB/MucB/SamB family DNA-damage repair protein	1134.5	655.7		SA1196	Y-family DNA polymerase	28.5	-3.5
E	tyrA	NWMN_1277	prephenate dehydrogenase	2626.5	1899.5		SA1197	prephenate dehydrogenase	212	185
G	-	NWMN_1278	hypothetical protein	3313.5	2532		SA1198	M42 family metallopeptidase	130.5	156.5
E	trpE	NWMN_1279	anthranilate synthase component I	904.464	304.157		SA1199
E	trpG	NWMN_1280	anthranilate synthase component II	633.086	531.564		SA1200	aminodeoxychorismate/anthranilate synthase component II	-9.5	-32
E	trpD	NWMN_1281	anthranilate phosphoribosyltransferase	610.9	411.7		SA1201	anthranilate phosphoribosyltransferase	-39.5	-58
E	trpC	NWMN_1282	indole-3-glycerol-phosphate synthase	754.817	468.8
E	trpF	NWMN_1283	N-(5'phosphoribosyl)anthranilate isomerase	701.2	434.85		SA1203	phosphoribosylanthranilate isomerase	74.5	38
E	trpB	NWMN_1284	tryptophan synthase subunit beta	910.65	592.35		SA1204	tryptophan synthase subunit beta	-14	-29.5
E	trpA	NWMN_1285	tryptophan synthase subunit alpha	1281.5	864.1		SA1205	tryptophan synthase subunit alpha	-34.5	-62.5
V	femA	NWMN_1286	methicillin resistance factor FemA	20136.5	17483.5		SA1206	glycine glycyltransferase FemA	1036.25	977.25
V	femB	NWMN_1287	methicillin resistance factor	12213	14714		SA1207	glycine glycyltransferase FemB	1050	1085.75
R	-	NWMN_1288	hydrolase-related protein	1196.9	886.35		SA1209	Cof-type HAD-IIB family hydrolase	88.5	32.5
S	-	NWMN_1289	hypothetical protein	2817	1996		SA1210	SWIM zinc finger family protein	38.5	30.5
E	opp-2F	NWMN_1290	oligopeptide ABC transporter ATP-binding protein	3954.5	2999		SA1211	ABC transporter ATP-binding protein	124	113
E	nikD	NWMN_1291	peptide ABC transporter ATP-binding protein	1293.5	903.3		SA1212	ABC transporter ATP-binding protein	155	178.5
E	opp-2C	NWMN_1292	oligopeptide transporter permease	838.929	642.893		SA1213	ABC transporter permease	317	303.5
E	opp-2B	NWMN_1293	oligopeptide transporter permease	747.2	606.4		SA1214	ABC transporter permease	153.5	206.5
G	-	NWMN_1294	hypothetical protein	964.6	631.5		SA1215	hypothetical protein
E	pepF	NWMN_1295	oligoendopeptidase F	4547.25	2450.5		SA1216	oligoendopeptidase F	247.75	157
P	phoU	NWMN_1296	PhoU family transcriptional regulator	399.85	346.5		SA1217	phosphate signaling complex protein PhoU	-11.5	1.5
P	pstB	NWMN_1297	phosphate ABC transporter ATP-binding protein	416.5	344.5		SA1218	phosphate ABC transporter ATP-binding protein	144	85.5
P	pstA	NWMN_1298	phosphate ABC transporter permease protein	110.815	68.785		SA1219	phosphate ABC transporter permease PstA	-2.5	20
P	pstC	NWMN_1299	phosphate ABC transporter permease protein	67.585	29.955		SA1220	phosphate ABC transporter permease subunit PstC	-9.5	-1.5
P	pstS	NWMN_1300	phosphate ABC transporter phosphate-binding protein PstS	240.3	176.185		SA1221	phosphate ABC transporter substrate-binding protein PstS	-5	4
S	cvfB	NWMN_1302	hypothetical protein	6115	4848.5		SA1223	RNA-binding virulence regulatory protein CvfB	759.5	745
R	-	NWMN_1303	ABC transporter ATP-binding protein	1819.5	1784		SA1224	ATP-binding cassette domain-containing protein	2185	1915.25
E	lysC	NWMN_1304	aspartate kinase II LysC	983.25	710		SA1225	aspartate kinase	317.5	233.5
E	asd	NWMN_1305	aspartate semialdehyde dehydrogenase	3972.5	1056.25		SA1226	aspartate-semialdehyde dehydrogenase	431	349
E	dapA	NWMN_1306	dihydrodipicolinate synthase	7244.5	3658.5		SA1227	4-hydroxy-tetrahydrodipicolinate synthase	481	424.5
E	dapB	NWMN_1307	dihydrodipicolinate reductase	2161.5	1444		SA1228	4-hydroxy-tetrahydrodipicolinate reductase	254.5	122.5
E	dapD	NWMN_1308	2,3,4,5-tetrahydropyridine-2-carboxylate N-succinyltransferase	2883	1619		SA1229	2,3,4,5-tetrahydropyridine-2,6-dicarboxylate N-acetyltransferase	944	166
R	hipO	NWMN_1309	hippurate hydrolase	3132	1724		SA1230	hydrolase	453	301.5
M	dal	NWMN_1310	alanine racemase	1766	1033		SA1231	alanine racemase	181.5	11.5
E	lysA	NWMN_1311	diaminopimelate decarboxylase	1652	1384		SA1232	diaminopimelate decarboxylase	917.5	589
V	msa	NWMN_1312	hypothetical protein	1978.5	1187.8		SA1233
K	cspA	NWMN_1313	cold shock protein	3982	4884		SA1234
S	-	NWMN_1314	hypothetical protein	949.15	493.925		SA1235	DUF1033 family protein	-21.5	-21.5
C	acyP	NWMN_1315	acylphosphatase	13184	8212.71		SA1236
R	xpaC	NWMN_1316	hypothetical protein	10642.5	8211.5		SA1237	5-bromo-4-chloroindolyl phosphate hydrolysis protein	1357	1727
P	telA	NWMN_1317	tellurite resistance protein	14014	10367.5		SA1238	toxic anion resistance protein	640	1117
E	braB	NWMN_1320	branched-chain amino acid transport system II carrier protein	923.55	342.81		SA1239	branched-chain amino acid transport system II carrier protein	150	29
P	norD	NWMN_1321	hypothetical protein	1239	1258.95		SA1240	nitric oxide reductase activation protein NorD	881	496.5
R	norQ	NWMN_1322	CbbQ/NirQ/NorQ/GpvN	5553	3586.5		SA1241	MoxR family ATPase	292	198
E	-	NWMN_1324	hypothetical protein	34495.5	23696		SA1243	hypothetical protein	2284.5	4011.5
C	odhB	NWMN_1325	dihydrolipoamide acetyltransferase	49162.5	41393.5		SA1244	dihydrolipoyllysine-residue succinyltransferase	1876	7270
C	sucA	NWMN_1326	alpha-ketoglutarate decarboxylase	65174	62750.5		SA1245	2-oxoglutarate dehydrogenase E1 component	11858.8	38324.5
T	arlS	NWMN_1327	two-component sensor histidine kinase	15553.5	14875		SA1246	sensor histidine kinase ArlS	219.25	236.75
T	truncated-arlR	NWMN_1328	DNA-binding response regulator ArlR	9823.5	8716		SA1247
I	-	NWMN_1329	hypothetical protein	9157	6864		SA1250	phosphatase PAP2 family protein	1237.5	1709.5
M	murG	NWMN_1330	N-acetylglucosaminyl transferase	10038	6936.5		SA1251	undecaprenyldiphospho-muramoylpentapeptide beta-N-acetylglucosaminyltransferase	836.5	899
K	-	NWMN_1331	acetyltransferase GNAT	10055	4272		SA1252	GNAT family N-acetyltransferase	176.5	155.5
M	ctpA	NWMN_1332	carboxyl-terminal protease	4018.5	3299.5		SA1253
G	ptbA	NWMN_1333	phosphotransferase system enzyme IIA	13095	10987		SA1255	PTS glucose transporter subunit IIA	266	863
O	msrB	NWMN_1334	methionine sulfoxide reductase B	19438.5	17624		SA1256	peptide-methionine (R)-S-oxide reductase MsrB	1248.5	2849.5
O	msrA	NWMN_1335	methionine sulfoxide reductase A	22190.2	18107.8		SA1257	peptide-methionine (S)-S-oxide reductase MsrA	1348	2570.5
S	-	NWMN_1336	hypothetical protein	24016	17795		SA1258	fatty acid kinase FakB2	2677	3604
H	dfrA	NWMN_1337	dihydrofolate reductase	52335.5	34622.5		SA1259	dihydrofolate reductase	2893	2481
F	thyA	NWMN_1338	thymidylate synthase	30283	18657.5		SA1260	thymidylate synthase	599.5	287
	-	NWMN_1339	hypothetical protein	8614.5	6270		SA1261	BrxA/BrxB family bacilliredoxin	441.5	593
C	cvfC	NWMN_1340	hypothetical protein	7780.86	5463		SA1262	virulence factor C	684	874.5
O	-	NWMN_1341	hypothetical protein	10984	7391.5		SA1263	hypothetical protein	2044.5	2252
S	-	NWMN_1342	hypothetical protein	443.45	291.1		SA1265	VUT family protein	115.5	102
L	rnhA	NWMN_1343	hypothetical protein	845.75	471.1		SA1266	ribonuclease HI family protein	475	334
	ebh2	NWMN_1344	cell wall associated fibronectin-binding protein	265.443	194.579
	ebh	NWMN_1345	hypothetical protein	500.95	155.063
G	norB	NWMN_1346	major facilitator transporter	2038.86	2100		SA1269	multidrug efflux MFS transporter NorB	53	-5
E	steT	NWMN_1347	amino acid permease	5158.75	5594.75		SA1270	amino acid permease	15.5	-28.5
E	ilvA1	NWMN_1348	threonine dehydratase	7780.5	6961.5		SA1271	bifunctional threonine ammonia-lyase/L-serine ammonia-lyase TdcB	-2	-67.5
E	ald	NWMN_1349	alanine dehydrogenase	8852	8080		SA1272	alanine dehydrogenase	12.5	-3
L	ypcP	NWMN_1350	5'-3' exonuclease	3991.5	2980		SA1273	5'-3' exonuclease	1659.5	2551.5
R	-	NWMN_1351	hypothetical protein	3903	2794		SA1274	hypothetical protein	1022	1118.25
S	piuB	NWMN_1352	hypothetical protein	211	180.9		SA1275	PepSY domain-containing protein	367	104.5
	-	NWMN_1353	hypothetical protein	1001.5	731.4		SA1276	DUF4889 domain-containing protein	500.5	357
L	-	NWMN_1354	hypothetical protein	500.4	401		SA1277	class I SAM-dependent RNA methyltransferase	508	325.5
	-	NWMN_1355	hypothetical protein	27029.5	52489		SA1278	hypothetical protein
S	-	NWMN_1357	hypothetical protein	24601	23675		SA1280	DUF1273 domain-containing protein	837.5	1363.5
	-	NWMN_1358	hypothetical protein	19695	14714		SA1281	DUF1798 family protein	376	694
R	recU	NWMN_1360	Holliday junction-specific endonuclease	11333	7141		SA1282	Holliday junction resolvase RecU	10150	10889
M	pbp2	NWMN_1361	penicillin-binding protein 2	19038.2	12767		SA1283	penicillin-binding protein	3765.25	4944.5
	-	NWMN_1362	hypothetical protein	2444	1936.5		SA1284	hypothetical protein	51.5	102
L	nth	NWMN_1363	endonuclease III	1618	1400.5		SA1285	endonuclease III	-12.5	1
L	dnaD	NWMN_1364	DNA replication protein DnaD	5908.5	3543		SA1286	DnaD domain-containing protein	402.5	398
J	asnC	NWMN_1365	asparaginyl-tRNA synthetase	4893.43	4982.57		SA1287	asparagine--tRNA ligase (asnC)	207	321
L	dinG	NWMN_1366	DnaQ family exonuclease/DinG family helicase	2483.4	1989.6		SA1288	ATP-dependent helicase DinG	941.75	881.75
H	birA	NWMN_1367	BirA bifunctional protein	2931	1973.25		SA1289	biotin--[acetyl-CoA-carboxylase] ligase	485	306
J	papS	NWMN_1368	tRNA CCA-pyrophosphorylase	895.85	619.9		SA1290	CCA tRNA nucleotidyltransferase	366	194.5
M	bshA	NWMN_1369	glycosyl transferase group 1	1634.07	1065.24		SA1291	N-acetyl-alpha-D-glucosaminyl L-malate synthase BshA	498	398
R	mazG	NWMN_1370	hypothetical protein	800.275	507.375		SA1292	nucleotide pyrophosphohydrolase	-0.5	31.5
R	-	NWMN_1371	hypothetical protein	33271.5	14489		SA1293	zinc metallopeptidase	6111.5	8147
S	-	NWMN_1372	hypothetical protein	1817.5	1188.3		SA1294	DUF1405 domain-containing protein	223	179
S	-	NWMN_1373	hypothetical protein	2810.5	1495		SA1295	IDEAL domain-containing protein	531	329
R	-	NWMN_1374	hypothetical protein	4464.43	1740.4		SA1296	hypothetical protein	606.5	511
E	aroA	NWMN_1375	3-phosphoshikimate 1-carboxyvinyltransferase	3131	1937.5		SA1297	3-phosphoshikimate 1-carboxyvinyltransferase	926	881
E	aroB	NWMN_1376	3-dehydroquinate synthase	3599	2118.5		SA1298	3-dehydroquinate synthase	49.5	25.5
E	aroC	NWMN_1377	chorismate synthase	3682.5	2041		SA1299	chorismate synthase	950.5	202.5
F	ndk	NWMN_1378	nucleoside diphosphate kinase	1490.95	1302.05		SA1301	nucleoside-diphosphate kinase	346.5	195
H	gerCC	NWMN_1379	heptaprenyl diphosphate syntase component II	5489	4591.5		SA1302	heptaprenyl diphosphate synthase subunit II EC:2.5.1.30	573	165.5
H	ubiE	NWMN_1380	ubiquinone/menaquinone biosynthesis methyltransferase	9858	8034.5		SA1303	demethylmenaquinone methyltransferase	1696	1169
	-	NWMN_1381	hypothetical protein	10287.5	7361		SA1304	heptaprenyl pyrophosphate synthase subunit A	1618	1270
L	hu	NWMN_1382	DNA-binding protein HU	63928	65174		SA1305	DNA-binding protein HU	4955	9018.5
C	gpsA	NWMN_1383	glycerol-3-phosphate dehydrogenase NAD-dependent	6381.93	4847.14		SA1306	NAD(P)H-dependent glycerol-3-phosphate dehydrogenase	3624	3537
R	engA	NWMN_1384	GTP-binding protein EngA	6089	4080.5		SA1307	ribosome biogenesis GTPase Der	2904.5	2357
J	rpsA	NWMN_1385	30S ribosomal protein S1	26582.2	28796.1		SA1308	30S ribosomal protein S1	1742	3786.5
F	cmk	NWMN_1386	cytidylate kinase	1860	1445		SA1309	(d)CMP kinase	204.5	249
E	ansA	NWMN_1387	L-asparaginase	213.9	149.85		SA1310	asparaginase	360	652.5
O	-	NWMN_1388	pyridine nucleotide-disulphide oxidoreductase	1153.5	671.85		SA1311	YpdA family putative bacillithiol disulfide reductase	665	857.5
	ebpS	NWMN_1389	elastin binding protein	65173.9	60358.8		SA1312	elastin-binding protein EbpS	730.5	967
L	recQ2	NWMN_1390	ATP-dependent DNA helicase RecQ	8217.5	5523		SA1313	ATP-dependent DNA helicase RecQ	497.5	601.5
S	ypbB	NWMN_1391	hypothetical protein	3251	2008.5		SA1314	hypothetical protein	466	382
C	fer	NWMN_1392	ferredoxin	3292.25	2221.25		SA1315	ferredoxin	316.5	445.5
S	ribU	NWMN_1393	hypothetical protein	3836.09	3202.77		SA1316	ECF transporter S component	257.5	244.5
	-	NWMN_1394	hypothetical protein	438.25	344.7
	-	NWMN_1397	hypothetical protein	1242.04	982.15		SA1320	hypothetical protein	378.75	294.75
	-	NWMN_1398	hypothetical protein	2043	1212.5		SA1317	hypothetical protein
T	srrB	NWMN_1399	staphylococcal respiratory response protein SrrB	7109.17	5024.5		SA1322	HAMP domain-containing protein	300	349
T	srrA	NWMN_1400	DNA-binding response regulator SsrA	17716.5	14646.5		SA1323	response regulator transcription factor	7124.5	7227
J	rluB	NWMN_1401	ribosomal large subunit pseudouridine synthase B	4827.5	3372		SA1324	rRNA pseudouridine synthase	426.5	245.5
K	scpB	NWMN_1402	segregation and condensation protein B	5397.5	3785.36		SA1325	SMC-Scp complex subunit ScpB	669.5	610
S	scpA	NWMN_1403	hypothetical protein	5807	3783		SA1326	segregation and condensation protein A	433.5	340
S	-	NWMN_1404	hypothetical protein	1161.25	638.85		SA1327	DUF309 domain-containing protein	-3.5	-12
L	xerD	NWMN_1405	integrase/recombinase XerD	3611.5	2915		SA1328	tyrosine recombinase XerD	1239.5	80.5
P	fur	NWMN_1406	transcriptional regulator Fur	13130.5	8753.5		SA1329	transcriptional repressor	957	738
L	nudF	NWMN_1407	NUDIX domain-containing protein	3375.14	2048.79		SA1330	NUDIX hydrolase	188	127
C	-	NWMN_1408	aldo/keto reductase	1939.64	1516.5		SA1331	aldo/keto reductase	314.5	687
R	-	NWMN_1409	short-chain oxidoreductase	4559.5	2956		SA1333	SDR family oxidoreductase	4.5	12.5
E	proC	NWMN_1410	pyrroline-5-carboxylate reductase	21706.5	13207		SA1334	pyrroline-5-carboxylate reductase	518.5	486.5
R	rnz	NWMN_1411	AtsA/ElaC	2249.5	1663		SA1335	ribonuclease Z	167.5	85.5
G	zwf	NWMN_1412	glucose-6-phosphate 1-dehydrogenase	11418	8364		SA1336	glucose-6-phosphate dehydrogenase	800.5	1275.5
K	graE	NWMN_1413	transcriptional regulator AraC	7133	6359.5		SA1337	AraC family transcriptional regulator	188.5	241.5
G	malA	NWMN_1414	alpha-D-1,4-glucosidase	2997.5	2190		SA1338	alpha-glucosidase	57.75	167.25
K	malR	NWMN_1415	maltose operon transcriptional repressor	3571	2226.5		SA1339	LacI family transcriptional regulator	-10.5	26
E	-	NWMN_1416	glyoxalase	4209	2805		SA1340	glyoxalase	347.5	71.5
G	gnd	NWMN_1417	6-phosphogluconate dehydrogenase	16917.2	12159.1		SA1342	NADP-dependent phosphogluconate dehydrogenase	2362	2768.5
E	-	NWMN_1418	peptidase T	10424.5	6218		SA1343	M20/M25/M40 family metallo-hydrolase	520	764.5
S	-	NWMN_1419	hypothetical protein	2874.5	2231		SA1344	aromatic acid exporter family protein	523	438
	-	NWMN_1420	hypothetical protein	1169.5	1004.2		SA1345	BrxA/BrxB family bacilliredoxin	494	474.5
C	bmfBB	NWMN_1421	2-oxoisovalerate dehydrogenase E2 component dihydrolipoamide acetyltransferase	3193	3010.5		SA1346	branched-chain alpha-keto acid dehydrogenase E2
C	bfmBAB	NWMN_1422	2-oxoisovalerate dehydrogenase E1 component beta subunit	4048	3492		SA1347	alpha-ketoacid dehydrogenase subunit beta	3108.5	3542
C	bfmBAA	NWMN_1423	2-oxoisovalerate dehydrogenase E1 component alpha subunit	6119.5	4111		SA1348	thiamine pyrophosphate-dependent dehydrogenase E1 component subunit alpha	4283.5	7272
C	lpdA	NWMN_1424	dihydrolipoamide dehydrogenase	8325.5	6534		SA1349	dihydrolipoyl dehydrogenase	1180	1196
L	recN	NWMN_1425	DNA repair protein RecN	6410	3683.5		SA1350	DNA repair protein RecN	1290.25	1408.75
K	ahrC	NWMN_1426	arginine repressor	6188.5	3677		SA1351	transcriptional regulator ArgR	1075.5	674
H	ispA	NWMN_1427	geranyltranstransferase	7749	5046		SA1352	polyprenyl synthetase family protein	1564	1143
L	xseA	NWMN_1428	exodeoxyribonuclease VII large subunit	6062.5	3740.5		SA1354	exodeoxyribonuclease VII large subunit	4201	2889
K	nusB	NWMN_1429	transcription antitermination protein NusB	7942	5208.5		SA1355	transcription antitermination factor NusB	2311	1745
S	-	NWMN_1430	hypothetical protein	5330	3793		SA1356	Asp23/Gls24 family envelope stress response protein	11016	9132.5
I	accC	NWMN_1431	acetyl-CoA carboxylase biotin carboxylase subunit	5532	3817.5		SA1357	acetyl-CoA carboxylase biotin carboxylase subunit	4475	3429
I	accB	NWMN_1432	acetyl-CoA carboxylase biotin carboxyl carrier protein	10350	6754		SA1358	acetyl-CoA carboxylase biotin carboxyl carrier protein	2662	1877.5
J	efp	NWMN_1433	elongation factor P	3025.5	2571.73		SA1359	elongation factor P	507	801.5
E	ypdF	NWMN_1434	proline dipeptidase	10881	8251.5		SA1360	aminopeptidase P family protein	1410	2348
	-	NWMN_1435	hypothetical protein	4817.14	3204.57		SA1361	hypothetical protein	83.5	63
H	lipM	NWMN_1437	biotin/lipoate A/B protein ligase	3882	2622.5		SA1363	lipoate--protein ligase family protein	195	171.5
P	-	NWMN_1438	rhodanese-like domain-containing protein	4500.5	3690		SA1364	rhodanese-like domain-containing protein	457	724
E	gcvPB	NWMN_1439	glycine dehydrogenase subunit 2	2534.5	2274.5		SA1365	glycine dehydrogenase subunit 2	290	1154.5
E	gcvPA	NWMN_1440	glycine dehydrogenase subunit 1	2503.5	2557.5		SA1366	aminomethyl-transferring glycine dehydrogenase subunit GcvPA	4168.5	13115
E	gcvT	NWMN_1441	glycine cleavage system aminomethyltransferase T	2771.5	2450		SA1367	glycine cleavage system aminomethyltransferase GcvT	2306.5	3501
E	aroK	NWMN_1442	shikimate kinase	5483.5	2354.45		SA1368	shikimate kinase	104	160
R	comGF	NWMN_1443	hypothetical protein	499.05	322.25		SA1369	hypothetical protein, similar to ComYC protein
	comGE	NWMN_1444	hypothetical protein	353.8	266.65		SA1370	competence protein ComGE	-41.5	-40.5
N	comGD	NWMN_1445	late competance protein comGD	234.75	146.55		SA1371	type II secretion system protein	-69	-64.5
U	comGC	NWMN_1446	competence protein ComGC-like protein	227	165.55		SA1372	prepilin-type N-terminal cleavage/methylation domain-containing protein	-54.5	-39.5
N	comGB	NWMN_1447	competence protein ComGB-like protein	104.166	64.231		SA1373	type II secretion system F family protein	836.5	-8.5
N	comGA	NWMN_1448	competence protein ComGA-like protein	165.3	136.4		SA1374	type II/IV secretion system protein	206	323
R	-	NWMN_1449	metallo-beta-lactamase super	4092	4396		SA1375	MBL fold metallo-hydrolase	793.5	1159
S	-	NWMN_1450	hypothetical protein	4633	2849.05		SA1376	MTH1187 family thiamine-binding protein	2137.5	2543
K	glcK	NWMN_1451	glucokinase	18668.5	14322		SA1377	ROK family glucokinase	4315	4344
R	gluP	NWMN_1452	rhomboid	9059.25	5889.25		SA1379	rhomboid family intramembrane serine protease	3025.5	2698.5
H	fthC	NWMN_1453	5-formyltetrahydrofolate cyclo-ligase	7128.56	3896		SA1380	5-formyltetrahydrofolate cyclo-ligase	663	786.5
J	rpmG	NWMN_1454	50S ribosomal protein L33	1841	1846		SAS047	Ribosomal protein L33
M	pbp3	NWMN_1455	penicillin-binding protein 3	8903	5840.5		SA1381	penicillin-binding protein 2	1234.75	1304.5
P	sodA	NWMN_1456	superoxide dismutase Mn	17177.5	22786.5		SA1382	superoxide dismutase	1318.5	2537.5
P	zur	NWMN_1457	zinc-specific metalloregulatory protein	329.6	250.05		SA1383	transcriptional repressor	125	131.5
P	znuB	NWMN_1458	ABC transporter permease	406.05	325.9		SA1384	metal ABC transporter permease	174.5	124
P	znuC	NWMN_1459	ABC transporter	573	411.1		SA1385	metal ABC transporter ATP-binding protein	-6	-54
L	nfo	NWMN_1460	endonuclease IV	3549	3019		SA1386	deoxyribonuclease IV	1755.5	1286
L	yqfR	NWMN_1461	ATP-dependent RNA helicase DEAD/DEAH box	6287	1696.51		SA1387	DEAD/DEAH box helicase	3699.5	2368.5
S	-	NWMN_1462	hypothetical protein	5171.5	4157		SA1388	Nif3-like dinuclear metal center hexameric protein	1153.5	830.5
R	trmK	NWMN_1463	hypothetical protein	3550.43	2765.97		SA1389	tRNA (adenine-N(1))-methyltransferase	1170.5	744
K	sigA	NWMN_1464	RNA polymerase sigma factor RpoD	7792	8145		SA1390	RNA polymerase sigma factor RpoD	1839	1789
L	dnaG	NWMN_1465	DNA primase	13315.8	9081.25		SA1391	DNA primase	3687	2916.75
S	yqfL	NWMN_1466	hypothetical protein	6788.5	3835		SA1392	kinase/pyrophosphorylase	338.5	242.5
R	ccpN	NWMN_1467	CBS domain-containing protein	4252.5	2698		SA1393	hypothetical protein	537.5	446.5
J	glyS	NWMN_1468	glycyl-tRNA synthetase	13993	10223		SA1394	glycine--tRNA ligase	971.5	1360
L	recO	NWMN_1469	DNA repair protein RecO	2492.36	2234.73		SA1395	DNA repair protein RecO	772.5	987.5
R	era	NWMN_1470	GTP-binding protein Era	10043.5	8024.25		SA1396	GTPase Era	1526	1848
F	cdd	NWMN_1471	cytidine deaminase	9544.5	6355		SA1397	cytidine deaminase	2221	2301
M	dgkA	NWMN_1472	diacylglycerol kinase	12024	7924.5		SA1398	diacylglycerol kinase	1530.5	1500
R	-	NWMN_1473	hypothetical protein	8760	4180.6		SA1399	hypothetical protein
T	phoH	NWMN_1474	phosphate starvation-induced protein PhoH-like protein	15214.5	10721		SA1400	PhoH family protein	159	190
	-	NWMN_1475	hypothetical protein	4388	6512.5		SA1401	hypothetical protein	4152	6099
S	-	NWMN_1476	hypothetical protein	40757.5	34470.5		SA1402	UPF0365 family protein	8272.5	12112
O	-	NWMN_1477	hypothetical protein	44025.9	35543.2		SA1403	hypothetical protein	8874	13122.5
J	rpsU	NWMN_1478	30S ribosomal protein S21	6280	8049		SA1404	30S ribosomal protein
J	-	NWMN_1479	hypothetical protein	5545.5	3976		SA1405	tRNA (N(6)-L-threonylcarbamoyladenosine(37)-C(2))- methylthiotransferase MtaB	894	505
S	rsmE	NWMN_1480	hypothetical protein	7554.5	4443		SA1406	16S rRNA (uracil(1498)-N(3))-methyltransferase	1127	726
J	prmA	NWMN_1481	ribosomal protein L11 methyltransferase	1554.5	1115		SA1407	50S ribosomal protein L11 methyltransferase	901.5	1343
O	dnaJ	NWMN_1482	DnaJ protein	4855.5	3141		SA1408	molecular chaperone DnaJ	1247.5	1721
O	dnaK	NWMN_1483	DnaK protein	11329.9	8221.21		SA1409	molecular chaperone DnaK	5705.25	8312.5
O	grpE	NWMN_1484	Hsp-70 cofactor GrpE protein	9307.25	5872.5		SA1410	nucleotide exchange factor GrpE	2328	3697
K	hrcA	NWMN_1485	heat-inducible transcription repressor HrcA	10459.5	7210		SA1411	heat-inducible transcription repressor HrcA	1593.5	2747.5
H	hemN	NWMN_1486	coproporphyrinogen III oxidase	306.05	238.7		SA1412	oxygen-independent coproporphyrinogen III oxidase	123.5	40.5
M	lepA	NWMN_1487	GTP-binding protein LepA	2351	1965.5		SA1413	elongation factor 4	1740.25	1185.5
J	rpsT	NWMN_1488	30S ribosomal protein S20	3635	3151		SA1414	30S ribosomal protein
L	holA	NWMN_1489	DNA polymerase III subunit delta	669.8	395.15		SA1415	DNA polymerase III subunit delta	4	-6
R	comEC	NWMN_1490	DNA internalization-related competence protein ComEC/Rec2	129.05	88.56		SA1416	DNA internalization-related competence protein ComEC/Rec2	-64.75	-87
F	comEB	NWMN_1491	competence protein ComEB required for DNA binding and uptake	1050.05	792.1		SA1417	ComE operon protein 2	169.5	58
L	comEA	NWMN_1492	competence protein ComEA	495.25	385.1		SA1418	ComEA family DNA-binding protein	213	13.5
Q	ubiE	NWMN_1493	hypothetical protein	2197	1372.45		SA1419	class I SAM-dependent methyltransferase	2360.5	2302.5
S	-	NWMN_1494	hypothetical protein	2335	2026		SA1420	ribosome silencing factor	3705	3433.5
H	yqeK	NWMN_1495	hypothetical protein	4133	3046.5		SA1421	HD domain-containing protein	3374	3127.5
H	nadD	NWMN_1496	nicotinate (nicotinamide) nucleotide adenylyltransferase	3531.64	2577.64		SA1422	nicotinate (nicotinamide) nucleotide adenylyltransferase	1919.5	1610.5
J	yhbY	NWMN_1497	hypothetical protein	3320.5	2125		SA1423	hypothetical protein
E	aroE	NWMN_1498	shikimate 5-dehydrogenase	4096.07	2782		SA1424	shikimate dehydrogenase	1877	1612
R	yqeH	NWMN_1499	GTP-binding protein YqeH	2936.5	2038		SA1425	ribosome biogenesis GTPase YqeH	2579	2234.5
R	yqeG	NWMN_1500	HAD superfamily hydrolase	4683.71	3197.07		SA1426	YqeG family HAD IIIA-type phosphatase	1894.5	1690
F	pfs	NWMN_1501	MTA/SAH nucleosidase	3030.5	2003		SA1427	5'-methylthioadenosine/S-adenosylhomocysteine nucleosidase	1965.5	2104
	-	NWMN_1502	hypothetical protein	187.6	189.5		SA1428	hypothetical protein
	entA	NWMN_1503	enterotoxin	277.925	165.05		SA1430	enterotoxin A precursor	325	517.5
S	-	NWMN_1504	hypothetical protein	846.457	666.379		SA1431	Fic family protein	-18.5	-20
P	mntH	NWMN_1505	hypothetical protein	1365.5	1385.6		SA1432	divalent metal cation transporter	2997	6229.5
R	lamB	NWMN_1506	hypothetical protein	6436	4152		SA1433	5-oxoprolinase subunit PxpA	8689.5	15381
I	accC	NWMN_1507	acetyl-CoA carboxylase biotin carboxylase	5977	4074.5		SA1434	acetyl-CoA carboxylase biotin carboxylase subunit	3163.5	5255.5
I	accB	NWMN_1508	acetyl-CoA carboxylase biotin carboxyl carrier protein	6193	2769.5		SA1435	acetyl-CoA carboxylase biotin carboxyl carrier protein subunit	3692	4258
E	ahs2	NWMN_1509	hypothetical protein	4535.5	3533		SA1436	biotin-dependent carboxyltransferase family protein	2812.5	3595
E	dur1	NWMN_1510	hypothetical protein	3872.71	3265.43		SA1437	5-oxoprolinase subunit PxpB	2430	2656.5
K	greA	NWMN_1511	transcription elongation factor	511.2	295.35		SA1438	transcription elongation factor GreA	974.5	721
F	udk	NWMN_1512	uridine kinase	5030.5	3678.5		SA1439	uridine kinase	2683	637.5
O	-	NWMN_1513	peptidase U32	4005	3194.5		SA1440	U32 family peptidase	2683.5	1736.5
O	-	NWMN_1514	peptidase U32	3506.5	2073		SA1441	U32 family peptidase	581.5	137
R	-	NWMN_1515	O-methyltransferase	2273	1223.5		SA1442	O-methyltransferase	1208	512.5
S	-	NWMN_1516	hypothetical protein	815.15	733.35		SA1443	DUF1292 domain-containing protein	1076.5	1300.5
L	yrrK	NWMN_1517	hypothetical protein	12071	8903.5		SA1444	Holliday junction resolvase RuvX	3201	4051.5
S	-	NWMN_1518	hypothetical protein	13007	5692.15		SA1445	IreB family regulatory phosphoprotein	4096.5	4580
J	alaS	NWMN_1519	alanyl-tRNA synthetase	2984	2276		SA1446	alanine--tRNA ligase	2452.75	2711.75
L	recD	NWMN_1520	helicase RecD/TraA	3170	2278.5		SA1447	ATP-dependent RecD-like DNA helicase	272.25	220.75
R	-	NWMN_1521	TPR domain-containing protein	1660	1055.75		SA1448	tetratricopeptide repeat protein	65	19.5
	-	NWMN_1522	hypothetical protein	4696.5	3294
J	mnmA	NWMN_1523	tRNA (5-methylaminomethyl-2-thiouridylate)- methyltransferase	3989	2834		SA1449	tRNA 2-thiouridine(34) synthase MnmA	920.5	1078
E	iscS2	NWMN_1524	aminotransferase class V	6755.5	4437.5		SA1450	cysteine desulfurase	1172	1246.5
C	-	NWMN_1525	luciferase	781.75	441.55		SA1451	LLM class flavin-dependent oxidoreductase	33	-2.5
K	cymR	NWMN_1528	Rrf2	9216.57	6058.57		SA1453	Rrf2 family transcriptional regulator	432.5	280
L	rarA	NWMN_1529	recombination factor protein RarA	7295	4872		SA1454	replication-associated recombination protein A	324	378
H	-	NWMN_1530	hypothetical protein	3465	1723.5		SA1455	tRNA threonylcarbamoyladenosine dehydratase	52.5	2.5
	-	NWMN_1531	hypothetical protein	20876.5	37865.5		SAS050	hypothetical protein
J	aspS	NWMN_1532	aspartyl-tRNA synthetase	1452.49	1354.67		SA1456	aspartate--tRNA ligase	1226.25	512
J	hisS	NWMN_1533	histidyl-tRNA synthetase	2670.5	1773.5		SA1457	histidine--tRNA ligase	2366.5	1639.5
M	lytH	NWMN_1534	N-acetylmuramoyl-L-alanine amidase	3499.9	2368.9		SA1458	cell wall amidase	222	168
J	dtd	NWMN_1535	D-tyrosyl-tRNA deacylase	10314.5	8971.5		SA1459	D-tyrosyl-tRNA(Tyr) deacylase	1367	1253.5
T	relA	NWMN_1536	GTP pyrophosphokinase	13810	9438.5		SA1460	bifunctional (p)ppGpp synthetase/guanosine-3',5'-bis(diphosphate) 3'-pyrophosphohydrolase	1842	1269.25
F	apt	NWMN_1537	adenine phosphoribosyltransferase	794.807	608.407		SA1461	adenine phosphoribosyltransferase	1854.5	582.5
L	recJ	NWMN_1538	single-stranded-DNA-specific exonuclease RecJ	1790	1374.5		SA1462	single-stranded-DNA-specific exonuclease RecJ	385.25	295
U	secF	NWMN_1539	bifunctional preprotein translocase subunit SecD/SecF	3172	2352		SA1463	protein translocase subunit SecDF	1195.75	912.25
U	yajC	NWMN_1540	preprotein translocase YajC subunit	3322.5	2204.5		SA1464	Preprotein translocase subunit YajC
J	tgt	NWMN_1541	queuine tRNA-ribosyltransferase	4343.5	3203.21		SA1465	tRNA guanosine(34) transglycosylase Tgt	6799.5	6389.5
J	queA	NWMN_1542	S-adenosylmethionine:tRNA ribosyltransferase-isomerase	5918	3635.5		SA1466	tRNA preQ1(34) S-adenosylmethionine ribosyltransferase-isomerase QueA	2608.5	1900.5
L	ruvB	NWMN_1543	Holliday junction DNA helicase B	9295.75	4793.5		SA1467	Holliday junction branch migration DNA helicase RuvB	2681.5	2522.5
L	ruvA	NWMN_1544	Holliday junction DNA helicase RuvA	9224.5	6241		SA1468	Holliday junction branch migration protein RuvA	3613.5	3546.5
R	pheB	NWMN_1545	hypothetical protein	8006.5	5114		SA1469	ACT domain-containing protein	2612	2575
R	obgE	NWMN_1546	GTPase ObgE	8964	5561.5		SA1470	GTPase ObgE	1141	1197
J	rpmA	NWMN_1547	50S ribosomal protein L27	6189.5	5988		SA1471	50S ribosomal protein L27	11677.5	12317.5
J	-	NWMN_1548	hypothetical protein	8709.5	7664		SA1472	ribosomal-processing cysteine protease Prp	23399	21557
J	rplU	NWMN_1549	50S ribosomal protein L21	7103	6609.5		SA1473	50S ribosomal protein L21	22662.5	21177
M	mreD	NWMN_1550	rod shape-determining protein MreD	3079.5	2630.5		SA1474	rod shape-determining protein MreD	2631	3163.5
M	mreC	NWMN_1551	rod shape-determining protein MreC	3301.5	2820.25		SA1475	rod shape-determining protein MreC	1277.5	1363.5
	-	NWMN_1552	hypothetical protein	2451.5	1636.5		SA1476	DUF4930 family protein	-4	293.5
	-	NWMN_1553	hypothetical protein	384.05	235.65		SA1477	hypothetical protein
	-	NWMN_1554	hypothetical protein	491.4	280.5		SA1478	hypothetical protein	70	148
L	radC	NWMN_1555	DNA repair protein RadC	260.9	175.1		SA1485	JAB domain-containing protein	-28.5	-35
N	comC	NWMN_1556	type III leader peptidase	334.2	232.567		SA1486	prepilin peptidase	-31.5	-107
H	folC	NWMN_1557	folylpolyglutamate synthase/dihydrofolate synthase	5655	4878		SA1487	bifunctional folylpolyglutamate synthase/dihydrofolate synthase	1573.5	1858
J	valS	NWMN_1558	valyl-tRNA synthetase	3873.5	3452.5		SA1488	valine--tRNA ligase	2228.75	1858.25
L	tag	NWMN_1559	DNA-3-methyladenine glycosidase	5145.5	3012		SA1489	DNA-3-methyladenine glycosylase I	154	151
R	abrB	NWMN_1560	ammonia monooxygenase	4215.29	3594.65		SA1490	AbrB family transcriptional regulator	313	387.5
H	hemL	NWMN_1561	glutamate-1-semialdehyde aminotransferase	11271.5	7310		SA1491	glutamate-1-semialdehyde 2,1-aminomutase	7629.5	10338
H	hemB	NWMN_1562	delta-aminolevulinic acid dehydratase	6512.86	4761.79		SA1492	porphobilinogen synthase	3800.25	4522.5
H	hemD	NWMN_1563	uroporphyrinogen III synthase	4554.5	3313.5		SA1493	uroporphyrinogen-III synthase	3328	3267.5
H	hemC	NWMN_1564	porphobilinogen deaminase	8316.5	6604.5		SA1494	hydroxymethylbilane synthase	2842	2458.5
O	hemX	NWMN_1565	HemA concentration negative effector HemX	8054.75	5883.25		SA1495	cytochrome c assembly protein	1369.5	1184.5
H	hemA	NWMN_1566	glutamyl-tRNA reductase	25069.3	24395.1		SA1496	glutamyl-tRNA reductase	3248.25	3506.25
R	engB	NWMN_1567	GTPase EngB	1967	1155.5		SA1497	YihA family ribosome biogenesis GTP-binding protein	655.5	361
O	clpX	NWMN_1568	ATP-dependent protease ATP-binding subunit	3457	3189.5		SA1498	ATP-dependent Clp protease ATP-binding subunit ClpX	2500	2435
O	tig	NWMN_1569	trigger factor	10541.5	9092		SA1499	trigger factor	2338	2375.5
R	-	NWMN_1570	hypothetical protein	5357.5	3366.5		SA1500	hypothetical protein	959.5	759
R	-	NWMN_1571	MutT/nudix	6139.36	3606.93		SA1501	NUDIX domain-containing protein	1908.5	1577
J	rplT	NWMN_1572	50S ribosomal protein L20	5655.5	3943		SA1502	50S ribosomal protein L20	5708.5	3458
J	rpmI	NWMN_1573	50S ribosomal protein L35	13241.5	8807.5		SA1503	Ribosomal protein L35
J	infC	NWMN_1574	translation initiation factor IF-3	18104.5	10749.5		SA1504	translation initiation factor IF-3	12526	5785
E	lysP	NWMN_1575	lysine-specific permease	6039.93	3990.07		SA1505	amino acid permease	311.75	380.25
J	thrS	NWMN_1576	threonyl-tRNA synthetase	10843	6354.5		SA1506	threonine--tRNA ligase	1330	1771.75
L	dnaI	NWMN_1577	primosomal protein DnaI	9706.5	4226.5		SA1507	primosomal protein DnaI	615	880.5
L	dnaB	NWMN_1578	replication initiation and membrane attachment protein	10957	6749.5		SA1508	helicase DnaB	506	571.5
K	nrdR	NWMN_1579	transcriptional regulator NrdR	15190	9145		SA1509	transcriptional repressor NrdR	1563.5	1896
G	gapB	NWMN_1580	glyceraldehyde 3-phosphate dehydrogenase 2	6297	9868.86		SA1510	type I glyceraldehyde-3-phosphate dehydrogenase	25	18.5
H	coaE	NWMN_1581	dephospho-CoA kinase	1768.5	1282		SA1511	dephospho-CoA kinase	685	1336
L	fpg	NWMN_1582	formamidopyrimidine-DNA glycosylase	5014	3367		SA1512	bifunctional DNA-formamidopyrimidine glycosylase/DNA-(apurinic or apyrimidinic site) lyase	1480	2443
L	polA	NWMN_1583	DNA polymerase I	6714	4691.5		SA1513	DNA polymerase I	865.75	1307.25
	-	NWMN_1584	hypothetical protein	6133	4191		SA1514	hypothetical protein
T	phoR	NWMN_1585	histidine kinase	4225	4838		SA1515	PAS domain S-box protein	659.75	1020.5
T	phoP	NWMN_1586	alkaline phosphatase synthesis transcriptional regulatory protein	11489.5	8787.5		SA1516	response regulator transcription factor	336	900.5
C	citC	NWMN_1587	isocitrate dehydrogenase	25303.5	15519.5		SA1517	NADP-dependent isocitrate dehydrogenase	5122	8081.5
C	citZ	NWMN_1588	methylcitrate synthase	16727.1	9829.9		SA1518	citrate synthase	3509.5	3636.5
E	aapA	NWMN_1589	D-serine/D-alanine/glycine transporter	8653	7507		SA1519	amino acid permease	2745	3284
G	pykA	NWMN_1592	pyruvate kinase	5695.5	5082.5		SA1520	pyruvate kinase	760	1016.25
G	pfkA	NWMN_1593	6-phosphofructokinase	12464.5	8749.5		SA1521	ATP-dependent 6-phosphofructokinase	529.5	639
I	accA	NWMN_1594	acetyl-CoA carboxylase carboxyltransferase subunit alpha	4168	3201.5		SA1522	acetyl-CoA carboxylase carboxyltransferase subunit alpha	3370	2801
I	accD	NWMN_1595	acetyl-CoA carboxylase subunit beta	2042	1826		SA1523	acetyl-CoA carboxylase carboxyltransferase subunit beta	1216	752
C	maeB	NWMN_1596	NADP-dependent malic enzyme	4074	3039		SA1524	NAD-dependent malic enzyme 4	1384	1016
L	dnaE	NWMN_1597	DNA polymerase III alpha subunit super	3225.01	1632.61		SA1525	DNA polymerase III subunit alpha	575.75	761.25
R	-	NWMN_1598	hypothetical protein	3331.5	2047.5		SA1526	pApA hydrolase Pde2	2301.5	2854
K	-	NWMN_1599	CBS domain-containing protein	5879.71	3410.64		SA1527	CBS domain-containing protein	416	405.5
T	uspA_2	NWMN_1600	universal stress protein	9302	9142.5		SA1528	universal stress protein	1410.5	2695
R	-	NWMN_1601	metallo-beta-lactamase super	17099.5	22418.5		SA1529	metal-dependent hydrolase	1238.5	2740
E	pepQ	NWMN_1602	proline dipeptidase-like protein	6730.43	4733.86		SA1530	aminopeptidase P family protein	1005.5	1660.5
E	ald	NWMN_1603	alanine dehydrogenase	7415	9015.5		SA1531	alanine dehydrogenase	2854	9496
T	uspA_1	NWMN_1604	universal stress protein	14514	15857.5		SA1532	universal stress protein	2194	5037
C	ackA	NWMN_1605	acetate kinase	979.75	1023.35		SA1533	acetate kinase	127.5	244
L	-	NWMN_1606	hypothetical protein	3330.5	2271.5		SA1534	class I SAM-dependent methyltransferase	488.5	437
O	tpx	NWMN_1607	thiol peroxidase	11138.5	8370		SA1535	thiol peroxidase	2379.5	2968
R	-	NWMN_1608	hypothetical protein	900	602.325		SA1536	membrane protein	1781.5	1368
H	thiI	NWMN_1609	thiamine biosynthesis protein ThiI	829.7	501.1		SA1537	tRNA 4-thiouridine(8) synthase ThiI	759	506.5
E	nifZ	NWMN_1610	aminotransferase class V	626.264	435.05		SA1538	cysteine desulfurase	759	366.5
D	ezrA	NWMN_1611	septation ring formation regulator EzrA	19022.5	17797		SA1539	septation ring formation regulator EzrA	3870.75	3982.5
T	-	NWMN_1612	GAF domain-containing protein	3054.29	2234.14		SA1540	GAF domain-containing protein	225	269
J	rpsD	NWMN_1613	30S ribosomal protein S4	1479.21	1535.29		SAS052	30S ribosomal protein S4	3603.5	3581.5
C	ugpQ2	NWMN_1614	glycerophosphoryl diester phosphodiesterase	2392.64	1694.57		SA1542	glycerophosphoryl diester phosphodiesterase	-30	-13.5
O	ohr	NWMN_1615	osmotic stress-related protein	3267	2437.5		SA1543	OsmC family protein	91	203.5
E	-	NWMN_1616	aminotransferase class V	16092.5	9460		SA1544	alanine--glyoxylate aminotransferase family protein	257.5	238
H	serA	NWMN_1617	D-3-phosphoglycerate dehydrogenase	4169.5	2471.5		SA1545	phosphoglycerate dehydrogenase	478.75	395.5
R	-	NWMN_1618	HAD superfamily hydrolase	6205	5206.5		SA1546	HAD family hydrolase	66.5	77.5
G	ptaA	NWMN_1619	PTS system N-acetylglucosamine-specific IIBC component	1965.21	1795.5		SA1547	PTS glucose transporter subunit IIBC	2789.5	4232
I	plsC	NWMN_1620	1-acyl-sn-glycerol-3-phosphate acyltransferase domain-containing protein	2325	1863.5		SA1548	1-acyl-sn-glycerol-3-phosphate acyltransferase	1300.5	1367
O	htrA1	NWMN_1621	serine protease HtrA	8182	5329.5		SA1549	trypsin-like serine protease	352.5	677
J	tyrS	NWMN_1622	tyrosyl-tRNA synthetase	1425	1141		SA1550	tyrosine--tRNA ligase	315	125.5
M	sgtA	NWMN_1623	transglycosylase domain-containing protein	1294.36	872.443		SA1551	penicillin-binding protein	142	180.5
M	isdH	NWMN_1624	haptoglobin-binding surface anchored protein	320.25	164.975		SA1552	haptoglobin-binding heme uptake protein HarA	49	83.5
F	fhs	NWMN_1625	formate--tetrahydrofolate ligase	15989.2	12200.6		SA1553	formate--tetrahydrofolate ligase	6923.75	21612.5
I	acsA	NWMN_1626	acetyl-CoA synthetase	11599.5	6645		SA1554	acetate--CoA ligase	415.75	561.75
	acuA	NWMN_1627	acetoin utilization protein	9542.5	5221		SA1555	hypothetical protein	40	28
B	acuC	NWMN_1628	acetoin utilization protein AcuC	11832	6347.5		SA1556	acetoin utilization protein AcuC	65	135.5
K	ccpA	NWMN_1629	catabolite control protein A	19036	16817		SA1557	catabolite control protein A	195.5	448.5
E	aroA	NWMN_1630	bifunctional 3-deoxy-7-phosphoheptulonate synthase/chorismate mutase	3171.5	2043		SA1558	3-deoxy-7-phosphoheptulonate synthase	366	304.5
	-	NWMN_1631	hypothetical protein	26651.5	32192.5		SA1559	hypothetical protein	7095.5	7616.5
R	-	NWMN_1632	hypothetical protein	10642.3	10060.9		SA1560	DUF948 domain-containing protein	3145.5	3991
M	murC	NWMN_1633	UDP-N-acetylmuramate--L-alanine ligase	12260	9127.5		SA1561	UDP-N-acetylmuramate--L-alanine ligase	9847.5	10429.5
D	ftsK	NWMN_1634	FtsK/SpoIIIE (DNA translocase stage III)	12045.5	9087		SA1562	DNA translocase FtsK	2820.75	2587.5
R	pheT2	NWMN_1635	hypothetical protein	10470	8221.5		SA1563	DUF4479 domain-containing protein	1346.5	882
S	-	NWMN_1636	hypothetical protein	5996	4603.5		SA1564	DUF1444 domain-containing protein	1732.5	1208
O	-	NWMN_1637	thioredoxin-like protein	6753	5497.5		SA1565	thioredoxin family protein	474.5	444
G	pepA1	NWMN_1638	glutamyl-aminopeptidase	3904	2717		SA1566	M42 family metallopeptidase	537	664
S	-	NWMN_1639	hypothetical protein	1452.38	892.4		SA1567	peptidase	-27.5	6.5
R	-	NWMN_1640	hypothetical protein	2144.5	1582		SA1568	MBL fold metallo-hydrolase	-4	25
R	trmB	NWMN_1641	tRNA (guanine-N(7)-)-methyltransferase	9762.5	6966		SA1569	tRNA (guanosine(46)-N7)-methyltransferase TrmB	2191.5	1136.5
M	-	NWMN_1642	hypothetical protein	12578	9318		SA1570	phosphotransferase	3440.5	3074
E	dat	NWMN_1643	D-alanine aminotransferase	11995	8737.5		SA1571	D-alanine aminotransferase	1116	616.5
E	pepV	NWMN_1644	dipeptidase PepV	37268.5	20823		SA1572	Mn(2+)-dependent dipeptidase Sapep	4248	2732.5
	-	NWMN_1645	hypothetical protein	20714	25330.5		SA1573	YtxH domain-containing protein	1363.5	1886.5
J	rsuA	NWMN_1646	ribosomal small subunit pseudouridine synthase A	5800	3745.5		SA1574	rRNA pseudouridine synthase	1043.5	1055
R	-	NWMN_1647	polysaccharide biosynthesis protein	3109.5	1994		SA1575	polysaccharide biosynthesis protein	1037.5	966.25
R	-	NWMN_1648	hypothetical protein	809.3	615.55		SA1576	NAD(P)/FAD-dependent oxidoreductase	379	385.5
	mrp	NWMN_1649	hypothetical protein	1296.5	916.2		SA1577	LPXTG-anchored repetitive surface protein SasC	-18.25	-36.75
P	-	NWMN_1650	rhodanese-like domain-containing protein	4282.5	3132.5		SA1578	rhodanese-like domain-containing protein	4218.5	5417
J	leuS	NWMN_1651	leucyl-tRNA synthetase	2384.5	1802.5		SA1579	leucine--tRNA ligase	1670.5	1948.75
G	-	NWMN_1652	multidrug resistance transporter protein B	452.1	326.5		SA1580	MFS transporter	107	59.5
R	-	NWMN_1653	hypothetical protein	2250.67	1158.2		SA1581	TIGR01212 family radical SAM protein	429	296
Q	-	NWMN_1654	hypothetical protein	1674.5	1122		SA1582	methyltransferase domain-containing protein	391	206.5
K	rot	NWMN_1655	staphylococcal accessory regulator Rot	26641.5	27997.5		SA1583	MarR family transcriptional regulator	286.5	508.5
I	pldB	NWMN_1657	lysophospholipase	2594.5	1705.1		SA1584	alpha/beta hydrolase	55.25	106.5
E	putA	NWMN_1658	proline dehydrogenase	21614.7	17703.6		SA1585	proline dehydrogenase	925	3592.5
H	ribH	NWMN_1659	riboflavin synthase beta subunit	7560.5	7044.75		SA1586	6,7-dimethyl-8-ribityllumazine synthase	389	822.5
H	ribA	NWMN_1660	riboflavin biosynthesis protein	37737	27036.4		SA1587	3,4-dihydroxy-2-butanone-4-phosphate synthase	612.5	1431
H	ribB	NWMN_1661	riboflavin synthase subunit alpha	34617.8	24442.6		SA1588	riboflavin synthase	812	1503.5
H	ribD	NWMN_1662	riboflavin biosynthesis protein RibD	41653.8	21945.3		SA1589	bifunctional diaminohydroxyphosphoribosylaminopyrimidine deaminase/5-amino-6-(5-phosphoribosylamino)uracil reductase RibD	359	473.5
S	-	NWMN_1663	hypothetical protein	1530.35	1441		SA1590	pyridine nucleotide-disulfide oxidoreductase	2	11.75
K	arsR	NWMN_1664	arsenate operon regulator	1399	936.9		SA1591	winged helix-turn-helix transcriptional regulator	614	406
P	arsB	NWMN_1665	Ars family arsenical pump	1788.5	1248.5		SA1592	arsenic transporter	404.5	338
T	arsC	NWMN_1666	arsenate reductase	927	505
G	-	NWMN_1667	mannosyl-glycoprotein endo-beta-N-acetylglucosamidase	15563.7	9336.5		SA1593	autolysin	1909.5	1219
K	rpoE1	NWMN_1668	RNA polymerase sigma-70	320.25	178.3		SA1595	RNA polymerase sigma factor SigS	35	1.5
	-	NWMN_1669	hypothetical protein	730.9	513		SA1596	competence protein ComK	152	46
	-	NWMN_1670	hypothetical protein	5701.5	1903.55		SA1597	hypothetical protein	38	31
R	-	NWMN_1671	CAAX amino terminal protease	1466.5	683.2		SA1598	CPBP family intramembrane metalloprotease SdpA	-13.5	-4.5
G	tal	NWMN_1672	translaldolase	290.7	253.4		SA1599	transaldolase	372	577
	-	NWMN_1673	hypothetical protein	281.7	186.65		SA1600
D	crcB	NWMN_1674	CrcB-like protein	529.45	310.79		SA1601	fluoride efflux transporter CrcB	-33	-36
D	crcB_1	NWMN_1675	CrcB-like protein	226.15	248.2		SA1602	Ribosomal protein L35;	-34	-3
R	dkgB	NWMN_1678	oxidoreductase	5989.5	4349.21		SA1606	aldo/keto reductase	200	872
	-	NWMN_1679	hypothetical protein	2761.56	2101.56		SA1607	NERD domain-containing protein	295	297.5
H	metK	NWMN_1680	S-adenosylmethionine synthetase	1334.5	1068		SA1608	methionine adenosyltransferase	743	524
C	pckA	NWMN_1681	phosphoenolpyruvate carboxykinase	22600.5	20714		SA1609	phosphoenolpyruvate carboxykinase (ATP)	333.25	1327
E	-	NWMN_1683	Dipeptidyl aminopeptidases/acylaminoacyl-peptidases DAP2	650.3	413.45		SA1611	S9 family peptidase	62.5	-14
L	ytkD	NWMN_1684	MutT/Nudix Hydrolase 8	501.95	288.4		SA1612	nucleoside triphosphatase YtkD	1464.5	1130.5
M	menC	NWMN_1685	o-succinylbenzoic acid synthetase	1681.25	1041.95		SA1614	o-succinylbenzoate synthase	1789	1290
I	menE	NWMN_1686	o-succinylbenzoic acid--coa ligase	1857.5	1011		SA1615	o-succinylbenzoate--CoA ligase	1198.25	1329
	-	NWMN_1687	lipoprotein	242.15	175.35		SA1616	DUF4909 domain-containing protein	31	28
	-	NWMN_1688	hypothetical protein	65174.5	61467
	-	NWMN_1689	hypothetical protein	29695	31335		SA1618	DUF4352 domain-containing protein	341.5	561
	-	NWMN_1690	hypothetical protein	548.2	341.35		SA1619	hypothetical protein	35.5	26
	-	NWMN_1691	hypothetical protein	686.8	438.05		SA1620
	-	NWMN_1692	hypothetical protein	558.05	338.05		SA1621	hypothetical protein	3	-15.5
E	-	NWMN_1693	hypothetical protein	1142.45	951.15
	-	NWMN_1694	hypothetical protein	3202	2517
L	-	NWMN_1695	transposase	1155.05	746.1
	-	NWMN_1696	hypothetical protein	204.6	143.5
	-	NWMN_1698	hypothetical protein	1778.1	1160.15
V	hsdS	NWMN_1699	type I restriction-modification enzyme S subunit EcoA	4420.5	2629		SA1625	restriction endonuclease subunit S	488.5	416
V	hsdM2	NWMN_1700	type I restriction-modification system M subunit	117.417	70.535		SA1626	type I restriction-modification system subunit M	788.25	619.75
O	splF	NWMN_1701	serine protease SplF	4739.5	5816.5		SA1627
O	splE	NWMN_1702	serine protease SplE	2258	8172.5
O	splD	NWMN_1703	serine protease SplD	3181.25	9475.5		SA1628	serine protease SplD	32	150.5
O	splC	NWMN_1704	serine protease SplC	3884	12281		SA1629	serine protease SplC	-25.5	76.5
O	splB	NWMN_1705	serine protease SplB	4762.5	13257.5		SA1630	serine protease SplB	43	38.5
O	splA	NWMN_1706	serine protease SplA	5137.5	14713.5		SA1631	serine protease SplA	20.5	58.5
	-	NWMN_1707	hypothetical protein	161.35	185.9
	-	NWMN_1708	hypothetical protein	994.1	1789		SA1633	DUF4888 domain-containing protein	181	-33.5
	epiG	NWMN_1709	lantibiotic ABC transporter protein	29606	12669.7
C	epiE	NWMN_1710	lantibiotic ABC transporter protein	26490	21337
V	epiF	NWMN_1711	ABC transporter	33924.5	26922.5
O	epiP	NWMN_1712	intracellular serine protease	1571	860.4
H	epiD	NWMN_1713	flavoprotein epiD	2352.5	1185.3
	epiC	NWMN_1714	epidermin biosynthesis protein EpiC authentic point mutation	1344	361.7
	bsaB	NWMN_1715	lantibiotic epidermin biosynthesis protein EpiB	1092.6	720.4
	epiA	NWMN_1716	gallidermin superfamily epiA protein	2075	1267
	bsaA1	NWMN_1717	lantibiotic precursor	3631.5	3609.5
	lukD	NWMN_1718	leukotoxin LukD	699.3	1364.7		SA1637	bi-component leukocidin LukED subunit D	21	-18
	lukE	NWMN_1719	leukotoxin LukE	1059.25	1829		SA1638	beta-channel forming cytolysin	-19.5	-11.5
	-	NWMN_1720	hypothetical protein	1085.2	895.9
	-	NWMN_1721	hypothetical protein	3447.5	2635		SA1639	DUF1828 domain-containing protein	156	152.5
R	-	NWMN_1722	hypothetical protein	4557.5	2982.5		SA1649	serine hydrolase family protein	764.5	145.5
H	hemY	NWMN_1723	protoporphyrinogen oxidase	2562.93	1534.43		SA1650	protoporphyrinogen oxidase	406	419
H	hemH	NWMN_1724	ferrochelatase	3872	2572.5		SA1651	ferrochelatase	2719	2296
H	hemE	NWMN_1725	uroporphyrinogen decarboxylase	3281	1822		SA1652	uroporphyrinogen decarboxylase	1416	1255.25
R	TRAP	NWMN_1726	RNAIII-activating protein TRAP	54590	41925.2		SA1653	signal transduction protein TRAP	2721	5200.5
U	ecsB	NWMN_1727	hypothetical protein	8800	6058		SA1654	ABC transporter permease	553.5	612
V	ecsA	NWMN_1728	ABC transporter ATP-binding protein	9190	4426		SA1655	ABC transporter ATP-binding protein	155.5	28
F	hit	NWMN_1729	Hit- involved in cell-cycle regulation	16394.8	10605.9		SA1656	HIT family protein	1015	1801
R	gvpP	NWMN_1730	hypothetical protein	28487	34212.5		SA1657	YtxH domain-containing protein	1561.5	2639.5
	-	NWMN_1732	hypothetical protein	466.65	256.75		SA1658	DUF3267 domain-containing protein	-39	-43.5
O	prsA	NWMN_1733	protein export protein PrsA	9639	7445		SA1659	foldase	1096.75	2744.75
R	cbf1	NWMN_1734	3'-5' exoribonuclease YhaM	1522	1455.5		SA1660	3'-5' exoribonuclease YhaM	423.5	627
S	-	NWMN_1735	hypothetical protein	26971.5	17341		SA1661	DNA double-strand break repair Rad50 ATPase	3706.25	4696
L	sbcD	NWMN_1736	DNA repair exonuclease	26943	15070.5		SA1662	exonuclease SbcCD subunit D	4158.5	3534
S	-	NWMN_1737	hypothetical protein	2385.5	3777		SA1663	YlbF/YmcA family competence regulator	218.5	303
S	-	NWMN_1738	hypothetical protein	2172.5	2042.25		SA1664
K	-	NWMN_1739	transcriptional regulator	3383.5	2114.5		SA1665	helix-turn-helix transcriptional regulator	926	31
T	yhcR	NWMN_1740	DNA-binding response regulator LuxR	2190	1428.5		SA1666	response regulator transcription factor	242.5	161.5
T	yhcS	NWMN_1741	sensor histidine kinase	2830	1563		SA1667	GAF domain-containing sensor histidine kinase	62	20.5
J	yhcT	NWMN_1742	ribosomal large subunit pseudouridine synthase D	2102	1680		SA1668	RluA family pseudouridine synthase	112	195
C	fumC	NWMN_1743	fumarate hydratase	3433	2929.5		SA1669	class II fumarate hydratase	592	1513.5
	-	NWMN_1744	hypothetical protein	315	214.3		SA1670	hypothetical protein	-38.5	-55
	-	NWMN_1745	hypothetical protein	75.83	43.53
G	-	NWMN_1746	hypothetical protein	34235	45356.5		SA1671	glucosamine-6-phosphate isomerase	807	1112
J	-	NWMN_1747	SpoU rRNA methylase	3332	2581.5		SA1672	tRNA (uridine(34)/cytosine(34)/5- carboxymethylaminomethyluridine(34)-2'-O)- methyltransferase TrmL	1067.5	1357
C	-	NWMN_1748	iron-sulfur cluster-binding protein	2847.5	2059		SA1673	tRNA epoxyqueuosine(34) reductase QueG	871	1025
E	glnQ	NWMN_1749	amino acid ABC transporter ATP-binding protein	1589	1393.9		SA1674	amino acid ABC transporter ATP-binding protein	-45.5	-28.5
E	-	NWMN_1750	ABC transporter permease protein	203.95	152.9		SA1675	ABC transporter permease subunit	77.5	195.5
R	pfoS/R	NWMN_1751	phosphotransferase system EIIC domain-containing protein	1278.5	1166.7		SA1676	PTS transporter subunit IIC	44.5	31.5
P	perR	NWMN_1753	ferric uptake regulator-like protein	5079.5	6053.5		SA1678	peroxide-responsive transcriptional repressor PerR	112	298
H	-	NWMN_1754	D-isomer specific 2-hydroxyacid dehydrogenase	7933.5	5644		SA1679	2-hydroxyacid dehydrogenase	987	1792.5
O	bcp	NWMN_1755	bacterioferritin comigratory protein	13287	9288.5		SA1680	thioredoxin-dependent thiol peroxidase	1011	1831.5
H	gsaB	NWMN_1756	glutamate-1-semialdehyde aminotransferase	1963.86	1375.29		SA1681	glutamate-1-semialdehyde 2,1-aminomutase	999.5	1280.5
S	-	NWMN_1757	hypothetical protein	13038	8070		SA1682	aromatic acid exporter family protein	494.5	932
V	msbA	NWMN_1758	ABC transporter ATP-binding/permease protein	165.15	128.545		SA1683	SAV1866 family putative multidrug efflux ABC transporter	415.75	489.25
J	-	NWMN_1759	hypothetical protein	3242	1833.75		SA1684	DUF402 domain-containing protein	579.5	535.5
L	mutY	NWMN_1760	A/G-specific adenine glycosylase	1842.5	1245.25		SA1685	A/G-specific adenine glycosylase	78	44.5
R	yfhP	NWMN_1761	hypothetical protein	5125.5	3566		SA1686	metal-dependent hydrolase	83	105.5
	tagG	NWMN_1762	hypothetical protein	1138.8	799.65		SA1687	membrane protein	1448.5	1931.5
G	tagH	NWMN_1763	ABC transporter ATP-binding protein	9122.14	5086.07		SA1688	ABC transporter ATP-binding protein	1204	1339.25
L	-	NWMN_1764	hypothetical protein	8404.5	4563		SA1689	DUF1811 family protein	321	365
R	recX	NWMN_1765	recombination regulator RecX	2880.5	1865		SA1690	recombination regulator RecX	30	11.5
M	sgtB	NWMN_1766	glycosyltransferase	2808.5	2622		SA1691	glycosyltransferase	187	549
R	pfpI	NWMN_1767	ThiJ/PfpI	16402	23501		SA1692	type 1 glutamine amidotransferase	1231.5	1369.5
E	-	NWMN_1778	hypothetical protein	220.05	126.45
K	-	NWMN_1811	phage anti-repressor	1576	753.6
K	-	NWMN_1812	phage repressor	11308	8616.5
L	int	NWMN_1814	phage family integrase	1405.5	974.3
R	-	NWMN_1815	hypothetical protein	1035.8	726.65		SA1693	radical SAM/CxCxxxxC motif protein YfkAB	31	42
I	-	NWMN_1816	hypothetical protein	8043.5	6269.5		SA1694	acyl-CoA thioesterase	702.5	963.5
E	ampS	NWMN_1817	aminopeptidase PepS	16044	11966.5		SA1695	aminopeptidase	1009	1176
S	yfkK	NWMN_1818	hypothetical protein	11666	7653		SA1696
T	ptpA	NWMN_1819	low molecular weight phosphotyrosine protein phosphatase	48970	48254		SA1697	low molecular weight phosphotyrosine protein phosphatase	623.5	1120
	-	NWMN_1820	hypothetical protein	7431.5	13447.5		SA1698	hypothetical protein	220	285
S	yihY	NWMN_1821	ribonuclease BN (tRNA maturation)	27003.5	30507.8		SA1699	YihY/virulence factor BrkB family protein	1762	1775.5
T	vraR	NWMN_1822	DNA-binding response regulator VraR	3816	2982.5		SA1700	response regulator transcription factor	770	2105.5
T	vraS	NWMN_1823	histidine kinase	5164.5	3585.5		SA1701	sensor histidine kinase	550.5	1352
S	yvqF	NWMN_1824	hypothetical protein	3706	2719.5		SA1702	transporter	532	1460
	-	NWMN_1825	ORF-X	3650.75	1610.38		SA1703	hypothetical protein	376	721.5
J	map	NWMN_1826	methionine aminopeptidase	4571.5	2644.5		SA1704	type I methionyl aminopeptidase	336.5	161.5
	-	NWMN_1828	hypothetical protein	185.15	110.42		SA1706	hypothetical protein	-81	-72
R	cobQ	NWMN_1829	CobB/CobQ-like glutamine amidotransferase	1463	1271.5		SA1707	glutamine amidotransferase	810.5	529.5
M	murE2	NWMN_1830	UDP-N-acetylmuramyl tripeptide synthetase	3475.25	2448.88		SA1708	Mur ligase family protein	1580	1008.5
P	ftn	NWMN_1831	ferritin	18474.2	25518.1		SA1709	H-type ferritin FtnA	946	444
L	polC	NWMN_1832	exonuclease	2097	1476.9		SA1710	3'-5' exonuclease	138.5	29.5
L	dinP	NWMN_1833	ImpB/MucB/SamB	664.771	400.95		SA1711	DNA polymerase IV	-67.5	-59
	-	NWMN_1834	hypothetical protein	3820.5	1978		SA1712	DUF3267 domain-containing protein	134	314.5
J	rumA	NWMN_1835	RNA methyltransferase	504.7	374.05		SA1713	RNA methyltransferase	422	367
I	dagK	NWMN_1836	lipid kinase	3897.5	3011		SA1714	diacylglycerol kinase	483.5	362.5
J	gatB	NWMN_1837	aspartyl/glutamyl-tRNA amidotransferase subunit B	3161.5	3288.5		SA1715	Asp-tRNA(Asn)/Glu-tRNA(Gln) amidotransferase subunit GatB	4587	5125.5
J	gatA	NWMN_1838	glutamyl-tRNA(Gln) amidotransferase A subunit	8723.86	6874.86		SA1716	Asp-tRNA(Asn)/Glu-tRNA(Gln) amidotransferase subunit GatA	14361.5	11796
J	gatC	NWMN_1839	aspartyl/glutamyl-tRNA amidotransferase subunit C	7258.5	4986		SA1717	Asp-tRNA(Asn)/Glu-tRNA(Gln) amidotransferase subunit GatC	6330	2631.5
E	putP	NWMN_1840	high affinity proline permease	9824	6224.5		SA1718	sodium/proline symporter PutP	104	362.75
R	camS	NWMN_1841	CamS sex pheromone cAM373	11380.5	7020		SA1719	CamS family sex pheromone protein	685	931.5
L	lig	NWMN_1842	DNA ligase NAD-dependent	3909.43	2445.93		SA1720	NAD-dependent DNA ligase LigA	5691.5	6750.25
L	pcrA	NWMN_1843	ATP-dependent DNA helicase PcrA	1974	1325.5		SA1721	DNA helicase PcrA	2060	2044.5
R	pcrB	NWMN_1844	geranylgeranylglyceryl phosphate synthase-like protein	6101.07	3315.36		SA1722	heptaprenylglyceryl phosphate synthase	216.5	117
S	-	NWMN_1845	hypothetical protein	2270	1636		SA1723	hypothetical protein	450	464
F	purB	NWMN_1846	adenylosuccinate lyase	3880.5	2922		SA1724	adenylosuccinate lyase	225	204
	sspB2	NWMN_1847	staphopain thiol proteinase	8474	9352		SA1725	cysteine protease staphopain A	228	170.5
	sspA	NWMN_1848	hypothetical protein	3853.5	4439.5		SA1726	staphostatin A	138	303
S	-	NWMN_1849	hypothetical protein	1419.5	1222		SA1727	DUF2179 domain-containing protein	374.5	551
H	nadE	NWMN_1850	NAD synthetase	7009	4735.5		SA1728	ammonia-dependent NAD(+) synthetase	1011	926.5
H	pncB	NWMN_1851	nicotinate phosphoribosyltransferase	5863	3288		SA1729	nicotinate phosphoribosyltransferase	2629	2541.5
P	nos	NWMN_1852	nitric oxide synthase oxygenase subunit	1576	1460.5		SA1730	nitric oxide synthase oxygenase	149	34
E	pheA	NWMN_1853	prephenate dehydratase	552.45	448		SA1731	prephenate dehydratase	178.5	167.5
P	sdcS	NWMN_1854	sodium-dependent transporter (huNaDC-1)	13091.5	9323		SA1732	SLC13 family permease	404.75	599.5
	-	NWMN_1855	hypothetical protein	9438	7873		SA1733
Q	entB3	NWMN_1856	pyrazinamidase/nicotinamidase	13310.5	10018		SA1734	cysteine hydrolase	630.5	426
C	ppaC	NWMN_1857	manganese-dependent inorganic pyrophosphatase	3572.5	2846.5		SA1735	manganese-dependent inorganic pyrophosphatase	345.5	420
C	aldH	NWMN_1858	aldehyde dehydrogenase	16699.5	12278.5		SA1736	aldehyde dehydrogenase	601.5	707.5
G	ykgB	NWMN_1859	hypothetical protein	872.1	659.8		SA1737	lactonase family protein	1811	2360
	yolD	NWMN_1860	hypothetical protein	760.4	668.35		SA1738	YolD-like family protein	-15	-27.5
R	-	NWMN_1862	hypothetical protein	3597.5	2055		SA1739	linear amide C-N hydrolase	25.5	-1.5
	-	NWMN_1863	hypothetical protein	6119.5	5212		SA1740	hypothetical protein	596	487
S	-	NWMN_1864	hypothetical protein	6215.5	4332.5		SA1741	DUF1700 domain-containing protein	953	745.5
	-	NWMN_1865	hypothetical protein	8747	5377		SA1742	membrane protein	560	315.5
	-	NWMN_1866	hypothetical protein	2019.21	1950.36		SA1744	phenol-soluble modulin export ABC transporter permease subunit PmtD	4326	17560.5
V	-	NWMN_1867	ABC transporter ATP-binding protein	5171.43	5644.21		SA1745	phenol-soluble modulin export ABC transporter ATP-binding protein PmtC	3620	12353.5
	-	NWMN_1868	hypothetical protein	3792	4464.5		SA1746	phenol-soluble modulin export ABC transporter permease subunit PmtB	2943	9075
V	-	NWMN_1869	ABC transporter ATP-binding protein	3317.5	4005		SA1747
K	-	NWMN_1870	GntR family regulatory protein	5957.5	6779.5		SA1748	GntR family transcriptional regulator	2150	5850.5
E	-	NWMN_1871	hypothetical protein	14075.8	9580.5		SA1749	aminotransferase class I/II-fold pyridoxal phosphate-dependent enzyme	1433	270.5
	truncated mapW	NWMN_1872	cell surface protein mapW2	16843.5	8184.5		SA1751	MAP domain-containing protein	0.5	18.5
	hlb	NWMN_1873	beta-hemolysin	2559.29	3753.36		SA1752	hypothetical protein	50	2235
	-	NWMN_1874	hypothetical protein	4626.5	4303.5		SA1753	hypothetical protein
	-	NWMN_1875	hypothetical protein	956.3	1133.5
	scn	NWMN_1876	hypothetical protein	16671	27217.5		SA1754	Staphylococcal complement inhibitor SCIN
	chp	NWMN_1877	chemotaxis-inhibiting protein CHIPS	2001	2888.5		SA1755	chemotaxis-inhibiting protein CHIPS	15	1
	truncated lytA	NWMN_1879	phage amidase	5194.5	4471		SA1757	truncated amidase lytA	3324.5	-6.5
	sak	NWMN_1880	staphylokinase	816.6	955.05		SA1758	staphylokinase precursor
	ami	NWMN_1881	amidase	47.2014	32.7543		SA1759	CHAP domain-containing protein	-74	-104
S	-	NWMN_1882	phage phi LC3 family holin	44.565	58.27		SA1760	phage holin	49.5	6
	sep	NWMN_1883	enterotoxin type A precursor	1410	1296.75		SA1761	staphylococcal enterotoxin type P	-76.5	-98.5
	-	NWMN_1884	hypothetical protein	25.945	17.52		SA1762	hypothetical protein	-84.5	-60
	-	NWMN_1885	phi PVL orf 22-like protein	61.295	85.395		SA1763	hypothetical protein
	-	NWMN_1886	phage minor structural protein	307.917	255.233		SA1764	hypothetical protein	-55.75	-50.25
J	-	NWMN_1887	phi PVL orfs 18-19-like protein	119.295	77.93		SA1765	phage tail protein	7	-14.5
M	-	NWMN_1888	hypothetical protein	2036.5	1064.2		SA1766	phage tail tape measure protein	-40.75	-69
	-	NWMN_1889	hypothetical protein	7.816	24.01		SA1767	hypothetical protein	-11.5	-10.5
	-	NWMN_1890	hypothetical protein	202.85	145.9		SA1768	phage tail protein	451	220
	-	NWMN_1891	hypothetical protein	463.7	183.865
		NWMN_1892	hypothetical protein	455.5	265.6
	-	NWMN_1893	hypothetical protein	274.7	149.7
	-	NWMN_1894	hypothetical protein	270.25	142.2
	-	NWMN_1895	hypothetical protein	429.55	234.45
	-	NWMN_1896	hypothetical protein	315.7	193.4
O	-	NWMN_1897	hypothetical protein	223.55	127.45
	-	NWMN_1898	hypothetical protein	458.55	250
R	-	NWMN_1899	hypothetical protein	117.45	69.515
	-	NWMN_1900	hypothetical protein	62.795	28.36
V	-	NWMN_1901	hypothetical protein	44.255	86.68
	-	NWMN_1902	hypothetical protein	254.2	200.15
	-	NWMN_1903	hypothetical protein	499.1	286.58
F		NWMN_1904	phage dUTP pyrophosphatase	530.5	333
		NWMN_1906	phi PVL orf 50-like protein	323.8	213.75
L	rusA	NWMN_1907	endodeoxyribonuclease RusA	250.2	186.7
L	dnaD2	NWMN_1908	hypothetical protein	419.05	258.875
L	ssb	NWMN_1909	phage single-strand DNA-binding protein	3737	2954.5		SA1792	single-stranded DNA-binding protein	-55	-38.5
R	-	NWMN_1910	hypothetical protein	356.55	173		SA1793	MBL fold metallo-hydrolase	-83	-75
L	recT	NWMN_1911	hypothetical protein	453.65	208.65
	-	NWMN_1912	hypothetical protein	149.023	91.1475
	-	NWMN_1913	hypothetical protein	150.15	55.68
	-	NWMN_1915	hypothetical protein	89.795	50.61
S	-	NWMN_1916	hypothetical protein	117.814	85.8921
	-	NWMN_1917	hypothetical protein	557.5	501.47
K	-	NWMN_1918	anti repressor	31.115	8.757		SA1801	oxidoreductase	-43	-72
	-	NWMN_1919	hypothetical protein	153.15	129.6		SA1802	hypothetical protein	-86	-60
K	-	NWMN_1920	helix-turn-helix domain-containing protein	150.4	97.96		SA1804	helix-turn-helix transcriptional regulator	-56.5	-46
K	-	NWMN_1921	helix-turn-helix domain-containing protein	3533.83	2341.5		SA1805	helix-turn-helix transcriptional regulator	210.5	193.5
L	-	NWMN_1922	exonuclease	5325.5	3160		SA1806	ATP-dependent helicase	152	135.5
	-	NWMN_1923	hypothetical protein	4594	2850
	hlb	NWMN_1924	hypothetical protein	5208.5	3393
L	int	NWMN_1925	integrase	392.2	245.8		SA1810	site-specific integrase	127	-37.5
	hlb	NWMN_1926	beta-hemolysin	350.1	182.998		SA1811	sphingomyelin phosphodiesterase	70	3134.25
	lukF	NWMN_1927	leukocidin/hemolysin toxin subunit F	4376.57	6444.21		SA1812	bi-component leukocidin LukGH subunit G	1000.5	11.5
	lukS	NWMN_1928	leukocidin/hemolysin toxin subunit S	9976	13693		SA1813	bi-component leukocidin LukGH subunit H	105.5	90.5
E	dapE	NWMN_1929	succinyl-diaminopimelate desuccinylase	32767.1	29968.6		SA1814	ArgE/DapE family deacylase	-13	4.5
Q	-	NWMN_1930	hypothetical protein	380.7	263.3
P	fhuD1	NWMN_1931	iron compound ABC transporter iron compound-binding protein	259.4	115.5
P	ktrB	NWMN_1932	cation transport protein	5405.5	2949.5		SA1815	TrkH family potassium uptake protein	0	2.5
K	-	NWMN_1933	acetyltransferase GNAT	6200.5	5777
	-	NWMN_1934	hypothetical protein	2978	2535.5
L	-	NWMN_1935	phage terminase small subunit	437.7	281.35		SA1820	terminase small subunit	32	-15.5
L	-	NWMN_1936	integrase	59.87	42.545
O	groEL	NWMN_1937	chaperonin GroEL	5643.5	3772.5		SA1836	chaperonin GroEL	961.75	2783.5
O	groES	NWMN_1938	co-chaperonin GroES	4841.5	3141		SA1837	10 kDa chaperonin GroES
R	-	NWMN_1939	hypothetical protein	1264.79	1184.84		SA1838	CPBP family intramembrane metalloprotease	-18.5	-43
	sdrH	NWMN_1940	SdrH protein	3147	2063		SA1839	hypothetical protein	295	227
R	-	NWMN_1941	hypothetical protein	1866.5	1230		SA1840	nitroreductase family protein	71.5	94
R	amiE	NWMN_1942	hydrolase	10502.5	6961		SA1841	carbon-nitrogen family hydrolase	622	1237.5
O	agrB	NWMN_1943	accessory gene regulator protein B	65174.5	65171.5		SA1842	accessory gene regulator AgrB	10.5	-8.5
	agrD	NWMN_1944	accessory gene regulator protein D	65173	65172.5		SAS066	Staphylococcal AgrD protein
T	argC2	NWMN_1945	accessory gene regulator protein C	27972.5	31415.5		SA1843	accessory gene regulator C
K	agrA	NWMN_1946	accessory gene regulator protein A	8981	11324.5		SA1844	response regulator transcription factor	1248	3249.5
G	frk1	NWMN_1947	fructokinase	11311.6	7006.14		SA1845	carbohydrate kinase	1731	1761
G	scrB	NWMN_1948	sucrose-6-phosphate hydrolase	10333	5512		SA1846	glycoside hydrolase family 32 protein	755.5	795
K	scrR	NWMN_1949	sucrose operon repressor	2164.5	1267		SA1847	LacI family transcriptional regulator	178	150.5
P	nrgA	NWMN_1950	ammonium transporter	93.965	67.97		SA1848	ammonium transporter	-4	10
O	-	NWMN_1951	hypothetical protein	117.25	98.255		SA1849	oxidoreductase	0	9
R	-	NWMN_1952	hypothetical protein	123.035	91.975		SA1850	YeeE/YedE family protein	9	-63
R	rex	NWMN_1953	redox-sensing transcriptional repressor Rex	1288.5	1035.6		SA1851	redox-sensing transcriptional repressor Rex	85.5	74.5
R	vga	NWMN_1954	ABC transporter ATP-binding protein	3959	2524.75		SA1852	ABC-F type ribosomal protection protein	786	544
L	mutS	NWMN_1955	MutS domain-containing protein	1424	969.35		SA1853	MutS family DNA mismatch repair protein	246	257.25
O	gcp	NWMN_1956	O-sialoglycoprotein endopeptidase	2214	1700		SA1854	tRNA (adenosine(37)-N6)-threonylcarbamoyltransferase complex transferase subunit TsaD	1359.5	1083.5
R	rimI	NWMN_1957	ribosomal-protein-alanine acetyltransferase	1996.5	1487		SA1855	ribosomal-protein-alanine N-acetyltransferase EC:2.3.1.128	1201.5	705
O	yeaZ	NWMN_1958	hypothetical protein	2845.21	1799.79		SA1856	tRNA (adenosine(37)-N6)-threonylcarbamoyltransferase complex dimerization subunit type 1 TsaB	421	296
R	yjeE	NWMN_1959	hypothetical protein	3877.57	2477.21		SA1857	tRNA (adenosine(37)-N6)-threonylcarbamoyltransferase complex ATPase subunit type 1 TsaE	508	432.5
E	ilvD	NWMN_1960	dihydroxy-acid dehydratase IlvD	815.1	486.8		SA1858	dihydroxy-acid dehydratase	381.5	319
E	ilvB	NWMN_1961	acetolactate synthase large subunit	1186	602.15		SA1859	biosynthetic-type acetolactate synthase large subunit	492	86.25
E	ilvC	NWMN_1962	ketol-acid reductoisomerase	2957.5	1578.5		SA1861	ketol-acid reductoisomerase	435	68
E	leuA	NWMN_1963	2-isopropylmalate synthase	879.65	359.65		SA1862	2-isopropylmalate synthase	495.5	105.75
C	leuB	NWMN_1964	3-isopropylmalate dehydrogenase	3166.93	1476.71		SA1863	3-isopropylmalate dehydrogenase	353	-7.5
E	leuC	NWMN_1965	isopropylmalate isomerase large subunit	1667.57	939.936		SA1864	3-isopropylmalate dehydratase large subunit	224.5	-14.5
E	leuD	NWMN_1966	isopropylmalate isomerase small subunit	1347.5	772.575		SA1865	3-isopropylmalate dehydratase small subunit	111	-36
E	ilvA	NWMN_1967	threonine dehydratase	438.4	138.615		SA1866	L-threonine dehydratase biosynthetic IlvA	-6	-49
S	-	NWMN_1968	hypothetical protein	126.55	111.8		SA1867	SprT family protein	3083.5	4624
K	tex	NWMN_1969	S1 RNA-binding domain-containing protein	3654	2695.5		SA1868	RNA-binding transcriptional accessory protein	2666.5	3603.75
K	sigB	NWMN_1970	RNA polymerase sigma factor SigB	65177.5	57769.5		SA1869	RNA polymerase sigma factor SigB	2627.25	2339.5
T	rsbW	NWMN_1971	serine-protein kinase RsbW	55389.5	43767.5		SA1870	anti-sigma B factor RsbW EC:2.7.11.1	2216	2110.5
T	rsbV	NWMN_1972	anti-sigma B factor antagonist	63938.5	46995		SA1871	anti-sigmaB factor antagonist
T	rsbU	NWMN_1973	sigmaB regulation protein RsbU	36390	24095.5		SA1872	serine phosphatase	2472.75	1959.5
T	ydcE	NWMN_1974	PemK family DNA-binding protein	36381.5	26896.5		SA1873	type II toxin-antitoxin system PemK/MazF family toxin	4058.5	4347
M	alr	NWMN_1975	alanine racemase	6963	4413.5		SA1874	alanine racemase	823.5	937.5
I	acpS	NWMN_1976	holo-(acyl-carrier-protein) synthase	5548	3828.5		SA1875	holo-ACP synthase	1310	1601.5
S	ydbS	NWMN_1977	hypothetical protein	8098	5152.5		SA1876	membrane protein	1675.5	1904.5
S	ydbT	NWMN_1978	hypothetical protein	5942.86	3827.5		SA1877	hypothetical protein	1789.25	1823.25
S	-	NWMN_1979	hypothetical protein	3929	2392.5		SA1878	hypothetical protein	544.5	504
P	kdpC	NWMN_1980	potassium-transporting ATPase C subunit	331.65	218.96		SA1879	K(+)-transporting ATPase subunit C	38.5	85
P	kdpB	NWMN_1981	potassium-translocating P-type ATPase B subunit	631.2	410.9		SA1880	potassium-transporting ATPase subunit KdpB	257.25	213.5
P	kdpA	NWMN_1982	potassium-transporting ATPase subunit A	434.15	281		SA1881	potassium-transporting ATPase subunit A	419.5	177.75
T	kdpD	NWMN_1983	sensor protein KdpD	4786.5	2976		SA1882	sensor histidine kinase KdpD	110	278.75
T	kdpE	NWMN_1984	DNA-binding response regulator KdpE	4950.5	3055.5		SA1883	response regulator transcription factor	41.5	258
L	cshA	NWMN_1985	DEAD-box ATP dependent DNA helicase	2969	2025		SA1885	DEAD/DEAH box helicase	1097	522.75
M	murF	NWMN_1986	UDP-N-acetylmuramoylalanyl-D-glutamyl-2,6-diaminopimelate--D-alanyl-D-alanyl ligase	16068.5	10318.5		SA1886	UDP-N-acetylmuramoyl-tripeptide--D-alanyl-D- alanine ligase	1452.5	1947
M	ddl	NWMN_1987	D-alanyl-alanine synthetase A	10852.5	6859.5		SA1887	D-alanine--D-alanine ligase	4385.5	5436
D	ftsW	NWMN_1988	cell division protein	3088.5	2342		SA1888	rod shape-determining protein RodA	519	385.5
	-	NWMN_1989	hypothetical protein	3767.5	7294.5		SAS068	hypothetical protein
P	-	NWMN_1990	hypothetical protein	1808.5	1406.5		SA1889	hypothetical protein
S	csoR	NWMN_1991	hypothetical protein	1867.5	1497		SA1890	copper-sensing transcriptional repressor CsoR	504.5	271
I	cls2	NWMN_1992	cardiolipin synthetase	4133.5	3245.5		SA1891	cardiolipin synthase	602.5	664.5
R	-	NWMN_1993	HD domain-containing protein	2870.5	2063		SA1892	HD domain-containing protein	359.5	339
U	oxaI	NWMN_1994	membrane protein oxaA	10081	6848		SA1893	membrane protein insertase YidC	6629.5	3528
H	thiE	NWMN_1995	thiamine-phosphate pyrophosphorylase	3356.5	2152.5		SA1894	thiamine phosphate synthase	1.5	214.5
H	thiM	NWMN_1996	hydroxyethylthiazole kinase	3029.5	1760.5		SA1895	hydroxyethylthiazole kinase	-12.5	153.5
H	thiD	NWMN_1997	phosphomethylpyrimidine kinase	5023.75	1799.93		SA1896	bifunctional hydroxymethylpyrimidine kinase/phosphomethylpyrimidine kinase	2.5	65.5
K	tenA	NWMN_1998	transcriptional regulator TenA	7013.5	3623.5		SA1897	thiaminase II	124	55
	sceD	NWMN_1999	transglycosylase SceD protein	329	160.5		SA1898	lytic transglycosylase SceD	30.5	-17.5
	-	NWMN_2000	hypothetical protein	122.75	82.47			hypothetical protein
L	ssb	NWMN_2001	bacteriophage L54a single-stranded DNA binding protein	2118	1877.5		SA1899	single-stranded DNA-binding protein	-50.5	-19
	ywpF	NWMN_2002	hypothetical protein	2125.5	1507		SA1900	hypothetical protein	-54.5	-19
I	fabZ	NWMN_2003	beta-hydroxyacyl-ACP dehydratase	1778	1324.7		SA1901	3-hydroxyacyl-ACP dehydratase FabZ	1929.5	1343.5
M	murA	NWMN_2004	UDP-N-acetylglucosamine 1-carboxyvinyltransferase	42557	31946.5		SA1902	UDP-N-acetylglucosamine 1-carboxyvinyltransferase	2241.5	1528.5
S	-	NWMN_2005	hypothetical protein	35869	26260.5		SA1903	hypothetical protein
C	atpC	NWMN_2006	F0F1 ATP synthase subunit epsilon	9293	9712.5		SA1904	F0F1 ATP synthase subunit epsilon	6874	11735.5
C	atpD	NWMN_2007	F0F1 ATP synthase subunit beta	28741.5	22132.5		SA1905	F0F1 ATP synthase subunit beta	7766.5	12763
C	atpG	NWMN_2008	F0F1 ATP synthase subunit gamma	50638.5	30630		SA1906	F0F1 ATP synthase subunit gamma	48203.5	56337.5
C	atpA	NWMN_2009	F0F1 ATP synthase subunit alpha	65174	62046		SA1907	F0F1 ATP synthase subunit alpha	47250.2	46335.2
C	atpH	NWMN_2010	F0F1 ATP synthase subunit delta	49872.5	35080		SA1908	F0F1 ATP synthase subunit delta	57494	56344
C	atpF	NWMN_2011	F0F1 ATP synthase subunit B	50324.5	34470		SA1909	F0F1 ATP synthase subunit B	60174	56351.5
C	atpE	NWMN_2012	F0F1 ATP synthase subunit C	55960.5	36984		SA1910	F0F1 ATP synthase subunit C	21054	25206
C	atpB	NWMN_2013	F0F1 ATP synthase subunit A	39204.4	19851.8		SA1911	F0F1 ATP synthase subunit A	53983	56338.5
	atpI	NWMN_2014	hypothetical protein	36145.8	25480.2		SA1912	ATP synthase	40567.5	53214.5
M	mnaA	NWMN_2015	UDP-GlcNAc 2-epimerase	38264	27379.5		SA1913	UDP-N-acetylglucosamine 2-epimerase (non-hydrolyzing)	6824.5	9222.5
F	upp	NWMN_2016	uracil phosphoribosyltransferase	50161.5	38645.5		SA1914	uracil phosphoribosyltransferase	16161.5	24759.5
E	glyA	NWMN_2017	serine hydroxymethyltransferase	65174	60223		SA1915	serine hydroxymethyltransferase	27895.5	41680.5
S	ywlG	NWMN_2018	hypothetical protein	65172.5	38228.5		SA1916	TIGR01440 family protein	58637	56344
T	ptpB	NWMN_2019	phosphotyrosine protein phosphatase	909.5	709.15		SA1917	low molecular weight protein arginine phosphatase	1740	616
J	sua5	NWMN_2020	Sua5/YciO/YrdC/YwlC	1716.5	1250		SA1918	threonylcarbamoyl-AMP synthase	783	484
J	hemK	NWMN_2021	HemK family modification methylase	6274	4087.5		SA1919	peptide chain release factor N(5)-glutamine methyltransferase	2912	1579.5
J	prfA	NWMN_2022	peptide chain release factor 1	5734	3668		SA1920	peptide chain release factor 1	3250.5	1509.5
F	tdk	NWMN_2023	thymidine kinase	4720.71	2978.79		SA1921	thymidine kinase	1638	878
J	rpmE2	NWMN_2024	50S ribosomal protein L31 type B	652.05	658.9		SA1922	type B 50S ribosomal protein L31	574.5	734.5
K	rho	NWMN_2025	transcription termination factor Rho	3396.5	2105.5		SA1923	transcription termination factor Rho	2385.5	2142
C	aldA	NWMN_2026	aldehyde dehydrogenase	24170	25129.5		SA1924	aldehyde dehydrogenase family protein	393	704
K	-	NWMN_2027	hypothetical protein	14259.5	13910.5		SA1925	helix-turn-helix transcriptional regulator	3181.5	4686
M	murZ	NWMN_2028	UDP-N-acetylglucosamine 1-carboxyvinyltransferase	8593.79	5557.64		SA1926	UDP-N-acetylglucosamine 1-carboxyvinyltransferase	3053	4413.5
G	fbaA	NWMN_2029	fructose-bisphosphate aldolase	56483	49107		SA1927	fructose-bisphosphate aldolase	8092.5	14689.5
	-	NWMN_2030	hypothetical protein	2351.5	1861.5		SA1928	DUF2529 domain-containing protein	18	14
F	pyrG	NWMN_2031	CTP synthetase	1218.69	1036.19		SA1929	CTP synthase	7156.5	4102
K	rpoE	NWMN_2032	DNA-directed RNA polymerase subunit beta	3194.5	2871.5		SA1930	DNA-directed RNA polymerase subunit delta	959.5	1709.5
K	blt	NWMN_2033	acetyltransferase GNAT	1251.35	1201.03		SA1931	GNAT family N-acetyltransferase	442	744.5
H	coaA	NWMN_2034	pantothenate kinase	896.264	702.314		SA1932	type II pantothenate kinase	432.5	454
G	-	NWMN_2035	hypothetical protein	787.65	436.485		SA1933	DUF2750 domain-containing protein	134.5	90.5
E	-	NWMN_2036	hypothetical protein	4227	2667.5		SA1934	hypothetical protein	19	22.5
R	hmrA	NWMN_2037	aminobenzoyl-glutamate utilization protein B	3178	2043.5		SA1935	M20 family metallopeptidase	486	407.5
T	luxS	NWMN_2038	S-ribosylhomocysteinase	5604.5	4990.5		SA1936	S-Ribosylhomocysteinase
S	-	NWMN_2039	hypothetical protein	19540	13558.5		SA1937	membrane protein	1475.5	3101.5
F	pdp	NWMN_2040	pyrimidine-nucleoside phosphorylase	27614	18073		SA1938	pyrimidine-nucleoside phosphorylase (deoA)	702.5	1586.5
F	deoD	NWMN_2042	purine nucleoside phosphorylase	10743.5	9328.5		SA1940	purine-nucleoside phosphorylase	455.5	447.5
P	dps	NWMN_2043	general stress protein 20U	6533	9160.5		SA1941	DNA starvation/stationary phase protection protein	538	512
S	-	NWMN_2044	hypothetical protein	11137	9053		SA1942	thiol-disulfide oxidoreductase DCC family protein	325.5	1237.5
R	-	NWMN_2045	hypothetical protein	20737	10791		SA1943	EVE domain-containing protein	537.5	472
C	-	NWMN_2046	hypothetical protein	1836	1659.5		SA1944	hypothetical protein	410.5	206.5
G	manA	NWMN_2047	mannose-6-phosphate isomerase class I	4970	4398		SA1945	class I mannose-6-phosphate isomerase	680.5	152.5
M	ylbE	NWMN_2048	hypothetical protein	41766.5	29022		SA1946	SDR family oxidoreductase	1023	797.5
K	czrA	NWMN_2049	zinc and cobalt transport repressor protein	4870.29	3350.14		SA1947	Zn(II)-responsive metalloregulatory transcriptional repressor CzrA	153	197
P	czrB	NWMN_2050	cation efflux	4126.5	2869.5		SA1948	CDF family zinc efflux transporter CzrB	773.5	663
	truncated-SA	NWMN_2051	lytic regulatory protein	5793	5541.5		SA1956	hypothetical protein	3601	1370
L	-	NWMN_2052	resolvase	4710	2936
	-	NWMN_2053	SAP domain-containing protein	4691	2877.5
R	-	NWMN_2054	haloacid dehalogenase-like hydrolase	3906	2800.93		SA1957	Cof-type HAD-IIB family hydrolase	1081	1357
P	-	NWMN_2055	ABC transporter ATP-binding protein	2640.07	1566.86		SA1958	ABC transporter ATP-binding protein	508.5	480
M	glmS	NWMN_2056	D-fructose-6-phosphate amidotransferase	2210.72	2282.58		SA1959	glutamine--fructose-6-phosphate transaminase (isomerizing)	2232	1488.75
G	mtlF	NWMN_2057	PTS system mannitol-specific IIBCcomponent	561.95	328.45		SA1960	PTS mannitol transporter subunit IICB	2284.75	318.25
G	bglG	NWMN_2058	transcriptional antiterminator BglG	4680.75	3905.75		SA1961	BglG family transcription antiterminator	796	285.75
G	mtlA	NWMN_2059	PTS system mannitol-specific IIA component	16047	13331.5		SA1962	mannitol-specific phosphotransferase enzyme IIA component	1162.5	577
G	mtlD	NWMN_2060	mannitol-1-phosphate 5-dehydrogenase	14462.6	14010.5		SA1963	mannitol-1-phosphate 5-dehydrogenase	168	26.5
	fmtB	NWMN_2061	methicillin resistance determinant FmtB protein	2606.75	1148.45		SA1964	DUF1542 domain-containing protein	-32.25	-56.25
G	glmM	NWMN_2062	phosphoglucosamine mutase	24466.8	15648.5		SA1965	phosphoglucosamine mutase	960.5	1418
S	-	NWMN_2063	hypothetical protein	30425.3	19258		SA1966	YbbR-like domain-containing protein	4770.5	5594
S	disA	NWMN_2064	hypothetical protein	19574.7	12834.8		SA1967	TIGR00159 family protein	4756	5664
E	arg	NWMN_2065	arginase	13421.7	9479.21		SA1968	arginase	116	418
D	apbC	NWMN_2067	ATP-binding Mrp/Nbp35	3352.15	2561.62		SA1969	chromosome partitioning protein ParA	1639.5	1516
G	lmrB3	NWMN_2068	drug resistance transporter EmrB/QacA sub	2016	2099		SA1970	multidrug efflux MFS transporter LmrS	-29.5	-33.5
	sepA	NWMN_2069	hypothetical protein	1716	1290		SA1971	multidrug efflux transporter SepA	64	109
G	-	NWMN_2070	drug transporter	1018.5	851.1		SA1972	MFS transporter	896.5	509.5
R	-	NWMN_2071	hemolysin III	5729	4456.5		SA1973	hemolysin III family protein	567	406.5
G	-	NWMN_2072	UDP-N-acetylglucosamine pyrophosphorylase	5685.64	4222.29		SA1974	UDPGP type 1 family protein	1120	952.5
R	-	NWMN_2073	hypothetical protein	4306.5	3040.5		SA1975	metal-dependent hydrolase	301.5	283
C	-	NWMN_2074	hypothetical protein	4291.5	8159.5		SAS074	hypothetical protein
S	-	NWMN_2075	hypothetical protein	663.65	490.9		SA1976	YjiH family protein	251	971
P	htsC	NWMN_2076	FecCD iron compound ABC transporter permease	432.85	282.75		SA1977	iron-dicitrate ABC transporter permease (fecD)	646.5	1194.5
P	htsB	NWMN_2077	iron compound ABC transporter permease protein	440.114	245.557		SA1978	iron ABC transporter permease	1061.5	1393
P	htsA	NWMN_2078	ABC transporter periplasmic binding protein	1072.59	641.636		SA1979	ABC transporter substrate-binding protein	599	591.5
E	-	NWMN_2079	hypothetical protein	1555.36	1499.4		SA1980	staphyloferrin A biosynthesis protein SfaC	68.5	13.5
Q	-	NWMN_2080	aerobactin biosynthesis protein	9488.5	5980.5		SA1981	staphyloferrin A synthetase SfaB	271	242.25
G	-	NWMN_2081	hypothetical protein	658.85	327.05		SA1982	staphyloferrin A export MFS transporter	212.5	227
Q	-	NWMN_2082	aerobactin biosynthesis protein	3642.5	2071		SA1983	D-ornithine--citrate ligase SfnaD	332.25	524.75
S	asp23	NWMN_2086	alkaline shock protein 23	2130.5	4190		SA1984	Asp23/Gls24 family envelope stress response protein	3362	5060.5
	-	NWMN_2087	hypothetical protein	65175	65171		SA1985	DUF2273 domain-containing protein	4045	5799.5
	-	NWMN_2088	hypothetical protein	65173.1	65170.4		SA1986	alkaline shock response membrane anchor protein AmaP	5378.5	7587
M	opuD2	NWMN_2089	BCCT family osmoprotectant transporter	19778	23410.5		SA1987	BCCT family transporter	460.25	403.5
C	-	NWMN_2090	alcohol dehydrogenase zinc-containing	5278	3133		SA1988	zinc-binding alcohol dehydrogenase family protein	301.5	549.5
R	-	NWMN_2091	alcohol dehydrogenase zinc-containing	4217.29	3322.43		SA1989	NADP-dependent oxidoreductase	224	449
R	-	NWMN_2092	hypothetical protein	3362.5	2032.5		SA1990	alpha/beta hydrolase	315	337
G	lacG	NWMN_2093	6-phospho-beta-galactosidase	248.6	219.1		SA1991	6-phospho-beta-galactosidase	135	54.5
G	lacE	NWMN_2094	pts system lactose-specific IIBC component	353.95	278.5		SA1992	PTS lactose transporter subunit IIBC	246.25	691.75
G	lacF	NWMN_2095	PTS system lactose-specific IIA component	65177	21277.5		SA1993	PTS lactose/cellobiose transporter subunit IIA	120.5	450
G	lacD	NWMN_2096	tagatose 1,6-diphosphate aldolase	199	168.4		SA1994	tagatose 1,6-diphosphate aldolase	382	1035.5
G	lacC	NWMN_2097	tagatose-6-phosphate kinase	214.9	146.5		SA1995	tagatose-6-phosphate kinase	194	461.5
G	lacB	NWMN_2098	galactose-6-phosphate isomerase subunit LacB	201.45	115.85		SA1996	galactose-6-phosphate isomerase subunit LacB	554.5	1125.5
G	lacA	NWMN_2099	galactose-6-phosphate isomerase subunit LacA	109.58	65.7		SA1997	galactose-6-phosphate isomerase subunit LacA	589	1204.5
K	lacR	NWMN_2100	lactose phosphotransferase system repressor	2319	1945.5		SA1998	DeoR/GlpR transcriptional regulator	-22	-23.5
K	-	NWMN_2101	NAD-dependent deacetylase	1968	1318		SA1999	NAD-dependent protein deacylase	142.5	275
	-	NWMN_2102	hypothetical protein	432.05	265.7		SAS075	hypothetical protein
	-	NWMN_2103	hypothetical protein	1341.5	735.15
R	akr5F	NWMN_2104	aldo/keto reductase	474.9	405.05		SA2001	aldo/keto reductase	-31	-22
K	-	NWMN_2105	MerR family transcriptional regulator	131	57.455		SA2002	MerR family transcriptional regulator	-40.5	-20
	hysA	NWMN_2106	hyaluronate lyase	119.975	187.634		SA2003	polysaccharide lyase 8 family protein	222.25	50
M	-	NWMN_2107	M23/M37 peptidase domain-containing protein	3882	2333		SA2004	M23 family metallopeptidase	422	634.5
R	-	NWMN_2108	HAD family hydrolase IIB	4307	2725.5		SA2005	hydrolase	738	1060
	map-w	NWMN_2109	MHC class II analog protein	56175.5	63541.5		SA2006	MAP domain-containing protein	-8.5	51.5
Q	budA1	NWMN_2110	alpha-acetolactate decarboxylase	276.164	197.993		SA2007	acetolactate decarboxylase	-3	17
E	alsS	NWMN_2111	acetolactate synthase	252.05	241.4		SA2008	acetolactate synthase AlsS	203.5	155.75
	-	NWMN_2113	hypothetical protein	13341	10424.5
	-	NWMN_2114	hypothetical protein	12032	9852.5
O	clpA	NWMN_2115	hypothetical protein	13124	10667.5
	-	NWMN_2116	hypothetical protein	19475.8	14622.8
R	-	NWMN_2117	hypothetical protein	19019	13216.5
R	-	NWMN_2118	hypothetical protein	1185	651.3
J	rpsI	NWMN_2119	30S ribosomal protein S9	4992	4274.5		SA2016	30S ribosomal protein S9	10449.5	8782
J	rplM	NWMN_2120	50S ribosomal protein L13	9549.75	6675		SA2017	50S ribosomal protein L13	32952.5	23026
J	truA	NWMN_2121	tRNA pseudouridine synthase A	4865.5	2807.5		SA2018	tRNA pseudouridine(38-40) synthase TruA	3437	2520
P	ecfT	NWMN_2122	cobalt transport protein	5783.5	3341		SA2019	energy-coupling factor transporter transmembrane protein EcfT	2415.5	1687
P	cbiO	NWMN_2123	cobalt transporter ATP-binding subunit	4869.71	3144.57		SA2020		101.5	49
P	cbiO	NWMN_2124	cobalt transporter ATP-binding subunit	5998	3487.5		SA2021	energy-coupling factor transporter ATPase	591.5	471
J	rplQ	NWMN_2125	50S ribosomal protein L17	21635.5	16517		SA2022	50S ribosomal protein L17	9003	11500.5
K	rpoA	NWMN_2126	DNA-directed RNA polymerase subunit alpha	20638	14364.5		SA2023	DNA-directed RNA polymerase subunit alpha	14539	18402.5
J	rpsK	NWMN_2127	30S ribosomal protein S11	21297	14581.5		SA2024	30S ribosomal protein S11	70884	56333
J	rpsM	NWMN_2128	30S ribosomal protein S13	28754	19832.5		SA2025	30S ribosomal protein S13	73832.5	56342.5
J	infA	NWMN_2130	translation initiation factor IF-1	31345.1	22247.4		SA2026
F	adk	NWMN_2131	adenylate kinase	35753.5	23394.5		SA2027	adenylate kinase	75182	56367.5
U	secY	NWMN_2132	preprotein translocase subunit SecY	31990.5	19982.1		SA2028	preprotein translocase subunit SecY	75156.5	56361.5
J	rplO	NWMN_2133	50S ribosomal protein L15	17467.5	8621.5		SA2029	50S ribosomal protein L15	75185	56355
J	rpmD	NWMN_2134	50S ribosomal protein L30	20854	13897		SA2030	50S ribosomal protein L30	75150	56346
J	rpsE	NWMN_2135	30S ribosomal protein S5	29015.5	17709.5		SA2031	30S ribosomal protein S5	69193.5	56366.5
J	rplR	NWMN_2136	50S ribosomal protein L18	25724	15604.5		SA2032	50S ribosomal protein L18	75174	56364
J	rplF	NWMN_2137	50S ribosomal protein L6	18354	9494.5		SA2033	50S ribosomal protein L6	74962.5	56341
J	rpsH	NWMN_2138	30S ribosomal protein S8	20240.8	12996.6		SA2034	30S ribosomal protein S8	75153.5	56340.5
J	rpsN	NWMN_2139	30S ribosomal protein S14	24355.5	16940.5		SAS079	type Z 30S ribosomal protein S14 (rpsN)	74962.5	56338
J	rplE	NWMN_2140	50S ribosomal protein L5	16169	10049		SA2035	50S ribosomal protein L5	75158	56340.5
J	rplX	NWMN_2141	50S ribosomal protein L24	16474	9445.5		SA2036	50S ribosomal protein L24	75147	56325
J	rplN	NWMN_2142	50S ribosomal protein L14	22522	14412		SA2037	50S ribosomal protein L14	75178	56346.5
J	rpsQ	NWMN_2143	30S ribosomal protein S17	16269.5	11081.5		SA2038	30S ribosomal protein S17	71507	56032
J	rpmC	NWMN_2144	50S ribosomal protein L29	19456.8	11204		SA2039	50S ribosomal protein L29	75172	56333.5
J	rplP	NWMN_2145	50S ribosomal protein L16	6912.5	4588		SA2040	50S ribosomal protein L16	75102.5	56317.5
J	rpsC	NWMN_2146	30S ribosomal protein S3	22326.5	6220.75		SA2041	30S ribosomal protein S3	74159	56367
J	rplV	NWMN_2147	50S ribosomal protein L22	29635	17259		SA2042	50S ribosomal protein L22	75106.5	56328.5
J	rpsS	NWMN_2148	30S ribosomal protein S19	21590.5	12746.5		SA2043	30S ribosomal protein S19	61462.5	46953.5
J	rplB	NWMN_2149	50S ribosomal protein L2	17053.5	10152		SA2044	50S ribosomal protein L2	75143	56338
J	rplW	NWMN_2150	50S ribosomal protein L23	12904.5	8437.5		SA2045	50S ribosomal protein L23	33219.5	24797
J	rplD	NWMN_2151	50S ribosomal protein L4	13739.5	8590.5		SA2046	50S ribosomal protein L4	68175	47210.5
J	rplC	NWMN_2152	50S ribosomal protein L3	18388.5	12351		SA2047	50S ribosomal protein L3	67785.5	44089.5
J	rpsJ	NWMN_2153	30S ribosomal protein S10	15965.2	9854.25		SA2048	30S ribosomal protein S10	75107	56220.5
	-	NWMN_2154	hypothetical protein	18530	14261.5		SA2049	hypothetical protein	1691	2846.5
R	pbuG	NWMN_2155	xanthine/uracil permeases	1125.71	975.807		SA2050	NCS2 family permease	559.5	468
L	topB	NWMN_2156	DNA topoisomerase III	1815.5	1363.5		SA2051	DNA topoisomerase III	425.25	436.75
J	-	NWMN_2157	GCN5-related N-acetyltransferase	2163	1656		SA2052	GNAT family N-acetyltransferase	150	-51
G	glcU	NWMN_2158	sugar transporter	755.5	610.45		SA2053	glucose uptake protein GlcU	589.5	298.5
R	-	NWMN_2159	hypothetical protein	366.4	215.75		SA2054	AEC family transporter	34.5	13.5
	-	NWMN_2160	hypothetical protein	5849.5	4000.5		SAS081	hypothetical protein
	-	NWMN_2161	hypothetical protein	2564	1954.5		SA2055	hypothetical protein
V	-	NWMN_2162	acriflavin resistance protein	5158.75	2977.94		SA2056	efflux RND transporter permease subunit	1166	765.5
V	fmhB	NWMN_2163	FmhB protein	10881.1	7705.57		SA2057	lipid II:glycine glycyltransferase FemX	768.25	688.75
	-	NWMN_2164	hypothetical protein	6328	3825.5		SA2059	VOC family protein	47.5	-23.5
K	marR	NWMN_2165	MarR family regulatory protein	604.95	324.8		SA2060	winged helix DNA-binding protein	-20.5	-33.5
G	-	NWMN_2166	hypothetical protein	396.35	398.95		SA2061	MFS transporter	-12	-38
K	sarV	NWMN_2167	hypothetical protein	1527	873.15		SA2062	HTH-type transcriptional regulator SarV	302	157.5
H	moaA	NWMN_2168	molybdenum cofactor biosynthesis protein A	12241.5	10327.5		SA2063	GTP 3',8-cyclase MoaA	747	1083.5
H	mobA	NWMN_2169	molybdopterin-guanine dinucleotide biosynthesis protein A	7871.5	5587.5		SA2064	molybdenum cofactor guanylyltransferase MobA	1188	1575
H	moaD	NWMN_2170	molybdopterin converting factor subunit 1	11160	8670		SA2065	molybdopterin converting factor subunit 1	778	1215
H	moaE	NWMN_2171	molybdopterin converting factor moa	6730.71	4012.21		SA2066	molybdenum cofactor biosynthesis protein MoaE	2634	3792
H	mobB	NWMN_2172	molybdopterin-guanine dinucleotide biosynthesis protein MobB	9923.5	5896.5		SA2067	molybdopterin-guanine dinucleotide biosynthesis protein B	3323	4100.5
H	moeA	NWMN_2173	molybdopterin biosynthesis protein moeA	6595	4129.83		SA2068	molybdopterin molybdotransferase MoeA	1290	1457
H	moaC	NWMN_2174	molybdenum cofactor biosynthesis protein C	4689.5	4062		SA2069	cyclic pyranopterin monophosphate synthase MoaC	2678.5	3182.5
H	moaB	NWMN_2175	molybdopterin biosynthesis moaB	3698	2294.5		SA2070	molybdenum cofactor biosynthesis protein MoaB	3589	4265.5
H	moeB	NWMN_2176	molybdopterin biosynthesis MoeB	3822.5	2180.5		SA2071	molybdopterin biosynthesis protein MoeB	1942	1951.5
P	modC	NWMN_2177	molybdenum transport ATP-binding protein ModC	2614	1949.5		SA2072	ATP-binding cassette domain-containing protein	884	1047.5
P	modB	NWMN_2178	molybdenum ABC transporter permease protein	2365.5	2022.75		SA2073	molybdate ABC transporter permease subunit	940	939
P	modA	NWMN_2179	molybdenum ABC transporter periplasmic molybdate-binding protein	8823.5	6268		SA2074	molybdate ABC transporter substrate-binding protein	729.5	732
[truncated: 417 more rows]
